# Supplementary material for: Trends in adult body-mass index in 200 countries from 1975 to 2014: a pooled analysis of 1698 population-based measurement studies with 19·2 million participants
Source: PubMed Central journal article supplement (PMC7615134; doi:10.1016/s0140-6736(16)30054-x), 2016-04-02
Supplement: EMS187842-supplement-Appendix.pdf [file EMS187842-supplement-Appendix.pdf]

# THE LANCET

## Supplementary appendix

This appendix formed part of the original submission and has been peer reviewed. We post it as supplied by the authors.

Supplement to: NCD Risk Factor Collaboration (NCD-RisC). Trends in adult body-mass index in 200 countries from 1975 to 2014: a pooled analysis of 1698 population-based measurement studies with 19·2 million participants. *Lancet* 2016; **387**: 1377–96.

## **Appendix**

### **Trends in adult body-mass index in 200 countries from 1975 to 2014: a pooled analysis of 1698 population-based measurement studies with 19·2 million participants**

NCD Risk Factor Collaboration (NCD-RisC)

## Table of contents

|                                                                                                                                                                                                                                                                                                                           |     |
|---------------------------------------------------------------------------------------------------------------------------------------------------------------------------------------------------------------------------------------------------------------------------------------------------------------------------|-----|
| Appendix 1: Data sources .....                                                                                                                                                                                                                                                                                            | 2   |
| Appendix 2: Converting among mean BMI and prevalences of different BMI categories .....                                                                                                                                                                                                                                   | 6   |
| Appendix 3: Validation of statistical model .....                                                                                                                                                                                                                                                                         | 8   |
| Appendix Table 1: List of analysis regions and “super-regions”, and countries in each region. .                                                                                                                                                                                                                           | 10  |
| Appendix Table 2: Data sources used in the analysis.....                                                                                                                                                                                                                                                                  | 12  |
| Appendix Table 3: Coefficients of regressions to estimate the prevalences of different BMI categories when information was available on mean BMI.....                                                                                                                                                                     | 41  |
| Appendix Table 4: Age-standardised mean BMI by sex and country in 1975, 1985, 1995, 2005, and 2014.....                                                                                                                                                                                                                   | 56  |
| Appendix Table 5: Age-standardised prevalences of BMI <18.5 kg/m <sup>2</sup> , 18.5 to <20 kg/m <sup>2</sup> , 20 to <25 kg/m <sup>2</sup> , 25 to <30 kg/m <sup>2</sup> , 30 to <35 kg/m <sup>2</sup> , 35 to <40 kg/m <sup>2</sup> , ≥40 kg/m <sup>2</sup> by sex and country in 1975, 1985, 1995, 2005, and 2014..... | 65  |
| Appendix Table 6: Results of model validation.. ..                                                                                                                                                                                                                                                                        | 108 |
| Appendix Figure 1: Flowchart of secondary search for data sources.....                                                                                                                                                                                                                                                    | 141 |
| Appendix Figure 2: Number of data sources used in the analysis, by country.....                                                                                                                                                                                                                                           | 143 |
| Appendix Figure 3: Number of data sources by region and year. ....                                                                                                                                                                                                                                                        | 145 |
| Appendix Figure 4: Comparison of age-standardised mean BMI estimated using models with and without covariates. ....                                                                                                                                                                                                       | 147 |
| Appendix Figure 5: Standard deviation (SD) of BMI in 1975 vs. 2014, for ages 20-24 years, 45-49 years and 70-74 years.....                                                                                                                                                                                                | 149 |
| Appendix Figure 6: Male vs. female age standardised mean BMI in 1975 and 2014, and change from 1975 to 2014.....                                                                                                                                                                                                          | 151 |
| Appendix Figure 7: Probability of achieving the target of halting the rise of obesity compared to its 2010 levels by country if post-2000 trends continue. ....                                                                                                                                                           | 153 |
| Appendix Figure 8: Trends in age-standardised mean BMI and prevalences of BMI categories by sex and country. ....                                                                                                                                                                                                         | 155 |

## **Appendix 1: Data sources**

### *Data inclusion and exclusion*

Data sources were included in NCD-RisC database if:

- measured data on height, weight, waist circumference, or hip circumference were available;
- study participants were five years of age and older;
- data were collected using a probabilistic sampling method with a defined sampling frame;
- data were representative of the general population at the national, subnational, or community level;
- data were collected in or after 1950;
- data were from the countries and territories listed in Appendix Table 1.

We excluded all self-reported data because they are subject to bias. We also excluded data sources on population subgroups whose anthropometric status may differ systematically from the general population, including:

- studies that had included or excluded people based on their health status or cardiovascular risk;
- ethnic minorities;
- specific educational, occupational, or socioeconomic subgroups of the population; and
- those recruited through health facilities, with the exception noted below.

We used school-based data in countries where secondary school enrolment was 70% or higher, and used data whose sampling frame was health insurance schemes in countries where at least 80% of the population were insured. In addition, we used data collected through general practice and primary care clinics in high-income countries with universal insurance, because in these

settings contact with the primary care systems tends to be at least as good as response rates for population-based surveys. No studies were excluded based on the level of BMI. In this paper, we used BMI data on data from the NCD-RisC database for years 1975 through 2014, and among participants aged 18 years and older.

#### *Primary data access*

We used multiple routes for identifying and accessing data. We accessed publicly available population-based multi-country and national measurement surveys (e.g., Demographic and Health Surveys, and surveys identified via the Inter-University Consortium for Political and Social Research and European Health Interview & Health Examination Surveys Database) as well as the World Health Organization (WHO) STEPwise approach to Surveillance (STEPS) surveys. We requested, via WHO and its regional offices, from ministries of health and other national health agencies to identify and access population-based surveys. Requests were also sent via the World Heart Federation to its national partners. We made a similar request to the NCD Risk Factor Collaboration (NCD-RisC), a worldwide network of health researchers and practitioners working on NCD risk factors. To identify major sources not accessed through the above routes, we searched and reviewed published studies, as detailed below, and invited all eligible studies to join NCD-RisC.

Anonymised individual record data from sources included in NCD-RisC were re-analysed by the Pooling and Writing Group or by data holders according to a common protocol. All re-analysed data sources included mean BMI and prevalences for the BMI categories listed in Methods section of the main paper, in standard age groups (18 years, 19 years, 20-29 years, followed by

10 year age groups and 80+ years), as well as sample sizes and standard errors. Before calculating means and prevalences, we dropped participants with implausible BMI levels, defined as BMI < 10 kg/m<sup>2</sup> or BMI > 80 kg/m<sup>2</sup> (<0.2% of all subjects). All analyses incorporated appropriate sample weights and complex survey design when applicable. To ensure summaries were prepared according to the study protocol, the Pooling and Writing Group provided computer code to NCD-RisC members who requested assistance. We also recorded information about the study population, period of measurement, sampling approach, and measurement methods. This information was used to establish that each data source was population-based, and to assess whether it covered the whole country, multiple subnational regions, or one or a small number of communities, and whether it was rural, urban, or combined. All submitted data were checked by at least two independent members of the Pooling and Writing Group. Questions and clarifications were discussed with the Collaborating Group members and resolved before data were incorporated in the database.

Finally, we obtained data not accessed through the above routes by extracting from published reports all additional national health surveys identified through the above-described strategies, three subnational STEPS surveys, and six MONICA sites. We also extracted data compiled for a previous global pooling.<sup>11</sup> These sources had information on only some of our quantities of interest, e.g., only on mean and/or some prevalences. We used data that had all of the relevant quantities of interest (mean BMI as well as all the above-mentioned prevalences) to develop regression equations for predicting the missing metrics from those available. These regression equations are described in Appendix 2 and their coefficients are provided in Appendix Table 3.

We identified duplicate data sources by comparing studies from the same country and year. Additionally, NCD-RisC members received the list of all data sources in the database and were asked to ensure that the included data from their country met the inclusion criteria and that there were no duplicates. Data sources used in the analysis are listed in Appendix Table 2.

### *Secondary search for additional data sources*

To identify any major sources not accessed through the above routes, we searched Medline (via PubMed) for articles published between 1<sup>st</sup> January 1950 and 12<sup>th</sup> March 2013 using the search terms “body size”[mh:noexp] OR “body height”[mh:noexp] OR “body weight”[mh:noexp] OR “birth weight”[mh:noexp] OR “overweight”[mh:noexp] OR “obesity”[mh] OR “thinness”[mh:noexp] OR “Waist-Hip Ratio”[mh:noexp] or “Waist Circumference”[mh:noexp] or “body mass index” [mh:noexp]) AND (“Humans”[mh]) AND (“1950”[PDAT] : “2013”[PDAT]) AND (“Health Surveys”[mh] OR “Epidemiological Monitoring”[mh] OR “Prevalence”[mh]) NOT Comment[ptyp] NOT Case Reports[ptyp]. Articles were screened according to the inclusion and exclusion criteria described above. The number of articles identified and retained is summarised in Appendix Figure 1. As described above, we contacted the corresponding authors of all eligible studies and invited them to join NCD-RisC. We did similar searches for other cardio-metabolic risk factors including blood pressure, serum cholesterol, and blood glucose. All eligible studies were invited to join NCD-RisC and were requested to analyse data on all cardio-metabolic risk factors.

## **Appendix 2: Converting among mean BMI and prevalences of different BMI categories**

As described in the main text, we estimated mean BMI as well as prevalences of the following BMI categories:  $<18.5 \text{ kg/m}^2$ ,  $18.5 \text{ to } <20 \text{ kg/m}^2$ ,  $20 \text{ to } <25 \text{ kg/m}^2$ ,  $25 \text{ to } <30 \text{ kg/m}^2$ ,  $30 \text{ to } <35 \text{ kg/m}^2$ ,  $35 \text{ to } <40 \text{ kg/m}^2$ ,  $\geq 40 \text{ kg/m}^2$ . In 19.4% of our data points, those extracted from published studies or from a previous global pooling, data were available for a subset of these outcomes, and/or were available for prevalences of other BMI ranges. In order to use these data, we developed conversion (or cross-walking) regressions to estimate all of our outcome variables from the available data. All sources of uncertainty in the conversion, including the sampling uncertainty of the original data, the uncertainty of the regression coefficients and random effects, and the regression residuals, were carried forward by using repeated draws from their respective distributions. We accounted for the correlation among the uncertainties of regression coefficients and random effects, by drawing from their joint posterior distribution.

### *Estimating prevalences for BMI categories from mean BMI*

15.9% of all data used in the analysis had information on mean BMI but not on some or all of the prevalence outcomes. For these data, the cross-walking regressions used information on mean to estimate the missing prevalences. The dependent variable in each of the seven regressions for estimating prevalences of BMI categories from mean BMI was prevalence, fitted using generalised linear mixed models with a probit link; the independent variables were mean BMI (transformed as detailed in Appendix Table 3 to provide better fit to data), age, sex, year of data, and natural logarithm of per-capita gross domestic product (GDP). There were also statistical interactions between mean BMI and age and sex. The regression also included random effects for regions, to allow for the possibility that at each mean BMI level, prevalences of various BMI



categories may vary across regions. The coefficients of these regressions were estimated from the 80.6% of data for which all outcomes of interest were available, excluding data points for which there were fewer than 25 subjects. The regression coefficients and number of data points used in estimating the coefficients are shown in Appendix Table 3.

*Estimating mean BMI from prevalences of various BMI ranges*

3.5% of our data had information on prevalences of only selected BMI categories, some of which overlapped with our outcomes of interest (e.g., BMI of 25 to  $<30 \text{ kg/m}^2$ ) and others that were different from those for which we made estimates (e.g., BMI  $\geq 30 \text{ kg/m}^2$ ). We first converted these data to mean BMI, which was then used to estimate the prevalences used in our analysis as described above. The dependent variable in these regressions was the inverse of mean BMI; the independent variables were the probit-transformed prevalence, age, sex, year and  $\ln(\text{GDP})$ . We used this specification because the relationship between inverse mean BMI and the probit of prevalence was found to be closer to linear than relationships between other functions of mean BMI and prevalence. There were also statistical interactions between probit-transformed prevalence and age and sex. As above, the regressions also included random effects for regions.

### **Appendix 3: Validation of statistical model**

We tested how well our statistical model, which is described in the main text, predicts missing data in two different tests. In Test 1, we held out all data from 10% of countries with data (i.e., created the appearance of countries with no data where we actually had data). The countries whose data were withheld were randomly selected from the following three groups: data-rich (6 years or more of data for women and 5 years or more for men, with at least one year of data after 2000), data-poor (2 years of data for women and 1 year for men), and average data availability (3 to 5 years of data or 6 years or more of data with no data after 2000 for women, and one fewer year of data for men). In total, there were 66 data-rich countries for women and 72 for men; 52 data-poor countries for women and 48 for men; and 68 countries for women and 58 for men had average data availability.

We fitted the model to the data from the remaining 90% of countries and made estimates of the held-out observations. In Test 2, we assessed other patterns of missing data by holding out 10% of our data sources, again from a mix of data-rich, data-poor, and average-data countries, as defined above. For a given country, we either held out a random one third of the country's data or all of the country's 2000-2014 data to determine, respectively, how well we filled in the gaps for countries with intermittent data and how well we estimated in countries without recent data. We fitted the model to the remaining 90% of the dataset and made estimates of the held-out observations. We repeated each test five times, holding out a different subset of data in each repetition. In both tests, we calculated the differences between the held-out data and the estimates. We also checked the 95% CrIs of the estimates; in a model with good external predictive validity, 95% of held-out values would be included in the 95% CrIs.

The estimates of mean BMI were unbiased as evidenced by median errors that were very close to zero globally, and less than  $\pm 0.13 \text{ kg/m}^2$  in every subset of withheld data except for those in relation to age group in Test 1 where median errors ranged from  $-0.63$  to  $0.17 \text{ kg/m}^2$  (Appendix Table 6). Even the 25<sup>th</sup> and 75<sup>th</sup> percentiles of errors rarely exceeded  $\pm 0.8 \text{ kg/m}^2$ . The 95% credible intervals of estimated mean BMIs covered 94-98% of true data, which implies good estimation of uncertainty; among subgroups of data, coverage was rarely  $< 90\%$ . Median errors for prevalences of different BMI categories were also small, and ranged between  $-0.24$  percentage points (BMI 18.5 to  $< 20 \text{ kg/m}^2$  in men) to  $1.95$  percentage points (BMI 20 to  $< 25 \text{ kg/m}^2$  in men). Median absolute errors ranged from  $0.15$  to  $6.33$  percentage points. Estimates for women had slightly larger errors than those for men, possibly because there is more variation in female BMI within and across regions (see below) making it harder to estimate missing country-years. For comparison, median absolute differences for the same BMI categories between pairs of nationally representative surveys done in the same country and in the same year ranged  $0.9$ - $5.4$  percentage points, indicating that our estimates perform as well as running two parallel surveys in the same country and year. Coverage for different prevalence categories ranged between  $56\%$  and  $99\%$ , and was generally smaller at the tails of the distribution, because some age-sex groups had zero prevalences of extreme categories; the estimates, and their CrIs, can become very close to zero but not precisely zero.

**Appendix Table 1:** List of analysis regions and “super-regions”, and countries in each region. The hierarchical structure of the statistical model consisted of country, region, super-region, and world.

We did not have data on population by age group for American Samoa, Bermuda, French Polynesia, Greenland and Tokelau. Country-specific estimates were made but were not used in calculation regional and global prevalences because the latter requires weighting by age-specific population.

| <b>Super-region</b>                                    | <b>Region</b>                                                                                                                                                                                                                                                         |
|--------------------------------------------------------|-----------------------------------------------------------------------------------------------------------------------------------------------------------------------------------------------------------------------------------------------------------------------|
| <b>Sub-Saharan Africa (48)</b>                         | <b>Central Africa (6):</b> Angola, Central African Republic, Congo, DR Congo, Equatorial Guinea, Gabon                                                                                                                                                                |
|                                                        | <b>East Africa (17):</b> Burundi, Comoros, Djibouti, Eritrea, Ethiopia, Kenya, Madagascar, Malawi, Mauritius, Mozambique, Rwanda, Seychelles, Somalia, Sudan, Tanzania, Uganda, Zambia                                                                                |
|                                                        | <b>Southern Africa (6):</b> Botswana, Lesotho, Namibia, South Africa, Swaziland, Zimbabwe                                                                                                                                                                             |
|                                                        | <b>West Africa (19):</b> Benin, Burkina Faso, Cabo Verde, Cameroon, Chad, Cote d'Ivoire, Gambia, Ghana, Guinea, Guinea Bissau, Liberia, Mali, Mauritania, Niger, Nigeria, Sao Tome and Principe, Senegal, Sierra Leone, Togo                                          |
| <b>Central Asia, Middle East and North Africa (28)</b> | <b>Central Asia (9):</b> Armenia, Azerbaijan, Georgia, Kazakhstan, Kyrgyzstan, Mongolia, Tajikistan, Turkmenistan, Uzbekistan                                                                                                                                         |
|                                                        | <b>Middle East and North Africa (19):</b> Algeria, Bahrain, Egypt, Iran, Iraq, Jordan, Kuwait, Lebanon, Libya, Morocco, Occupied Palestinian Territory, Oman, Qatar, Saudi Arabia, Syrian Arab Republic, Tunisia, Turkey, United Arab Emirates, Yemen                 |
| <b>South Asia (6)</b>                                  | <b>South Asia (6):</b> Afghanistan, Bangladesh, Bhutan, India, Nepal, Pakistan                                                                                                                                                                                        |
| <b>East and South East Asia (16)</b>                   | <b>East Asia (4):</b> China, China (Hong Kong SAR), North Korea, Taiwan                                                                                                                                                                                               |
|                                                        | <b>South East Asia (12):</b> Brunei Darussalam, Cambodia, Indonesia, Lao PDR, Malaysia, Maldives, Myanmar, Philippines, Sri Lanka, Thailand, Timor-Leste, Viet Nam                                                                                                    |
| <b>Oceania (17)</b>                                    | <b>Polynesia and Micronesia (13):</b> American Samoa, Cook Islands, French Polynesia, Kiribati, Marshall Islands, Micronesia (Federated States of), Nauru, Niue, Palau, Samoa, Tokelau, Tonga, Tuvalu                                                                 |
|                                                        | <b>Melanesia (4):</b> Fiji, Papua New Guinea, Solomon Islands, Vanuatu                                                                                                                                                                                                |
| <b>High-income Asia Pacific (3)</b>                    | <b>High-income Asia Pacific (3):</b> Japan, Singapore, South Korea                                                                                                                                                                                                    |
| <b>Latin America and Caribbean (35)</b>                | <b>Andean Latin America (3):</b> Bolivia, Ecuador, Peru                                                                                                                                                                                                               |
|                                                        | <b>Caribbean (18):</b> Antigua and Barbuda, Bahamas, Barbados, Belize, Bermuda, Cuba, Dominica, Dominican Republic, Grenada, Guyana, Haiti, Jamaica, Puerto Rico, Saint Kitts and Nevis, Saint Lucia, Saint Vincent and the Grenadines, Suriname, Trinidad and Tobago |
|                                                        | <b>Central Latin America (9):</b> Colombia, Costa Rica, El Salvador, Guatemala, Honduras, Mexico, Nicaragua, Panama, Venezuela                                                                                                                                        |
|                                                        | <b>Southern Latin America (5):</b> Argentina, Brazil, Chile, Paraguay, Uruguay                                                                                                                                                                                        |
| <b>High-income Western countries (27)</b>              | <b>High-income English-speaking countries* (6):</b> Australia, Canada, Ireland, New Zealand, United Kingdom, United States of America                                                                                                                                 |
|                                                        | <b>North Western Europe (12):</b> Austria, Belgium, Denmark, Finland, Germany, Greenland, Iceland, Luxembourg, Netherlands, Norway, Sweden, Switzerland                                                                                                               |
|                                                        | <b>South Western Europe (9):</b> Andorra, Cyprus, France, Greece, Israel, Italy, Malta, Portugal, Spain                                                                                                                                                               |
| <b>Central and Eastern Europe (20)</b>                 | <b>Central Europe (13):</b> Albania, Bosnia and Herzegovina, Bulgaria, Croatia, Czech Republic, Hungary, Macedonia (TFYR), Montenegro, Poland, Romania, Serbia, Slovakia, Slovenia                                                                                    |
|                                                        | <b>Eastern Europe (7):</b> Belarus, Estonia, Latvia, Lithuania, Moldova, Russian Federation, Ukraine                                                                                                                                                                  |

\* Although high-income English-speaking countries are geographically separated, they exhibit remarkably similar trends in cardio-metabolic risk factors and outcomes. They were therefore grouped together so that the statistical model shares information amongst them more than it does with other countries that are geographically closer but epidemiologically more distinct. This similarity is also seen in results, e.g., in Figure 2 in the main paper.

**Appendix Table 2:** Data sources used in the analysis.

| Country        | Data years | Survey/study name                                                  | Level of representativeness | Age range as used for global analysis |       | Sample size |       |        |
|----------------|------------|--------------------------------------------------------------------|-----------------------------|---------------------------------------|-------|-------------|-------|--------|
|                |            |                                                                    |                             | Rural, urban, or both                 | Male  | Female      | Male  | Female |
| Afghanistan    | 2013       | National Nutrition Survey                                          | National                    | both                                  | 18-49 |             |       | 12987  |
| Albania        | 2001       | Shapo et al., Public Health Nutr 6:471-77, 2003                    | Community                   | urban                                 | 24+   | 24+         | 535   | 585    |
| Albania        | 2008-2009  | DHS                                                                | National                    | both                                  | 18-49 | 18-49       | 2534  | 6372   |
| Algeria        | 2003       | STEPS                                                              | Community                   | both                                  | 25-64 | 25-64       | 1612  | 2435   |
| Algeria        | 2005       | Transition and Health Impact in North Africa                       | National                    | both                                  | 35-70 | 35-70       | 2004  | 2737   |
| Algeria        | 2007-2009  | The ISOR (Insulino-resistance in ORan) study                       | Community                   | urban                                 | 30-64 | 30-64       | 378   | 409    |
| American Samoa | 1976-1978  | McGarvey, Am J Clin Nutr 53(6 Suppl):1586S-1594S, 1991             | National                    | both                                  | 18+   | 18+         | 850   | 1191   |
| American Samoa | 1990       | McGarvey, Pac Health Dialog 8(1):157-62, 2001                      | National                    | both                                  | 25+   | 25+         | 359   | 484    |
| American Samoa | 1994       | McGarvey, Pac Health Dialog 8(1):157-62, 2001                      | National                    | both                                  | 25+   | 25+         | 165   | 241    |
| American Samoa | 2004       | STEPS                                                              | National                    | both                                  | 25-64 | 25-64       | 949   | 1060   |
| Argentina      | 1981-1985  | Hernandez et al., Diabetes Res Clin Pract 3:277-83, 1987           | Community                   | urban                                 | 20-74 | 20-74       | 395   | 414    |
| Argentina      | 1985-1986  | INTERSALT                                                          | Community                   | urban                                 | 20-59 | 20-59       | 100   | 100    |
| Argentina      | 1995-1998  | de Sereday et al., Diabetes Metab 30:335-9, 2004                   | Subnational                 | urban                                 | 18-74 | 18-74       | 924   | 1246   |
| Argentina      | 2003       | CEDES-Programa VIGIA-Banco Mundial, 2004                           | Community                   | urban                                 | 18-74 | 18-74       | 151   | 176    |
| Argentina      | 2004-2005  | Cardiovascular Risk factors Multiple Evaluation in Latin America   | Community                   | urban                                 | 25-64 | 25-64       | 733   | 742    |
| Argentina      | 2005       | Encuesta Nacional de Nutricion y Salud 2005                        | National                    | both                                  |       | 18-49       |       | 4803   |
| Argentina      | 2006       | Virasoro Survey                                                    | Community                   | urban                                 | 18-84 | 18-84       | 261   | 306    |
| Argentina      | 2008-2011  | The VELA Project                                                   | Community                   | rural                                 | 18+   | 18+         | 146   | 273    |
| Argentina      | 2011-2012  | CESCAS Study                                                       | Community                   | urban                                 | 35-74 | 35-74       | 1584  | 2395   |
| Armenia        | 1998       | The health and nutritional status of children and women in Armenia | National                    | both                                  |       | 18-45       |       | 2420   |
| Armenia        | 2000       | DHS                                                                | National                    | both                                  |       | 18-49       |       | 5264   |
| Armenia        | 2005       | DHS                                                                | National                    | both                                  | 18-49 | 18-49       | 1025  | 5545   |
| Australia      | 1975       | Busselton Health Study                                             | Community                   | urban                                 | 18+   | 18+         | 373   | 418    |
| Australia      | 1978       | Busselton Health Study                                             | Community                   | urban                                 | 18+   | 18+         | 462   | 550    |
| Australia      | 1980       | Sydney coronary heart disease prevention program                   | Community                   | urban                                 | 25-64 | 25-64       | 705   | 689    |
| Australia      | 1980       | Risk Factor Prevalence Survey                                      | National                    | urban                                 | 25-64 | 25-64       | 2764  | 2839   |
| Australia      | 1981       | Busselton Health Study                                             | Community                   | urban                                 | 18+   | 18+         | 225   | 290    |
| Australia      | 1983       | MONICA, Newcastle                                                  | Subnational                 | urban                                 | 35-64 | 35-64       | 1215  | 1244   |
| Australia      | 1983       | MONICA, Perth inner                                                | Community                   | urban                                 | 25-64 | 25-64       | 861   | 921    |
| Australia      | 1983       | Risk Factor Prevalence Survey                                      | National                    | urban                                 | 25-64 | 25-64       | 3733  | 3863   |
| Australia      | 1988-1989  | Dubbo Study of Australian Elderly                                  | Community                   | urban                                 | 59+   | 59+         | 877   | 1219   |
| Australia      | 1988-1989  | MONICA, Newcastle                                                  | Subnational                 | urban                                 | 35-64 | 35-64       | 672   | 671    |
| Australia      | 1988-1989  | MONICA, Newcastle                                                  | Community                   | urban                                 | 25-34 | 25-34       | 70    | 84     |
| Australia      | 1988-1989  | MONICA, Perth inner                                                | Community                   | urban                                 | 25-64 | 25-64       | 403   | 405    |
| Australia      | 1988-1989  | MONICA, Perth outer                                                | Community                   | urban                                 | 25-64 | 25-64       | 412   | 419    |
| Australia      | 1989       | Risk Factor Prevalence Surveys 1989                                | National                    | urban                                 | 18+   | 18+         | 4497  | 4678   |
| Australia      | 1992-1993  | Australia Longitudinal Study of Ageing                             | Community                   | urban                                 | 65+   | 65+         | 814   | 746    |
| Australia      | 1994       | MONICA, Newcastle                                                  | Subnational                 | urban                                 | 35-64 | 35-64       | 637   | 688    |
| Australia      | 1994       | MONICA, Perth inner                                                | Community                   | urban                                 | 25-64 | 25-64       | 363   | 349    |
| Australia      | 1994       | MONICA, Perth outer                                                | Community                   | urban                                 | 25-64 | 25-64       | 373   | 387    |
| Australia      | 1995-1996  | National Nutrition Study                                           | National                    | both                                  | 18+   | 18+         | 4864  | 5352   |
| Australia      | 1996-1998  | Western Australian AAA Screening Program                           | Community                   | urban                                 | 65-84 |             | 12194 |        |
| Australia      | 1999-2000  | The Australian Diabetes, Obesity and Lifestyle Study 1999-2000     | National                    | both                                  | 25+   | 25+         | 4991  | 6070   |
| Australia      | 1999-2003  | North West Adelaide Health Study                                   | Community                   | urban                                 | 18+   | 18+         | 1932  | 2122   |
| Australia      | 2000       | Perth children                                                     | Community                   | both                                  | 25    | 25          | 266   | 334    |
| Australia      | 2004-2005  | Janus et al., Med J Aust 187:147-52, 2007                          | Community                   | rural                                 | 25-74 | 25-74       | 383   | 423    |
| Australia      | 2004-2005  | The Australian Diabetes, Obesity and Lifestyle Study 2004-2005     | National                    | both                                  | 30+   | 30+         | 2874  | 3472   |
| Australia      | 2004-2006  | North West Adelaide Health Study                                   | Community                   | urban                                 | 20+   | 20+         | 1523  | 1679   |
| Australia      | 2007-2008  | National Health Survey                                             | National                    | both                                  | 18+   | 18+         | 5279  | 5655   |
| Australia      | 2008-2010  | North West Adelaide Health Study                                   | Community                   | urban                                 | 24+   | 24+         | 1168  | 1318   |
| Australia      | 2011-2012  | Australian Health Survey                                           | National                    | both                                  | 18+   | 18+         | 9975  | 10849  |
| Australia      | 2012       | The Australian Diabetes, Obesity and Lifestyle Study 2012          | National                    | both                                  | 37+   | 37+         | 2048  | 2526   |
| Austria        | 1977       | Rhomberg, Wien Klin Wochenschr Suppl 127:1-30, 1981                | Community                   | rural                                 | 20-64 | 20-64       | 295   | 316    |
| Austria        | 1986       | CINDI                                                              | Community                   | both                                  | 25-64 | 25-64       | 657   | 715    |
| Austria        | 1992       | Vorarlberg Health Monitoring and Promotion Programme               | Subnational                 | rural                                 | 18+   | 18+         | 14161 | 18835  |
| Austria        | 1998       | Vorarlberg Health Monitoring and Promotion Programme               | Subnational                 | rural                                 | 18+   | 18+         | 16153 | 20915  |
| Austria        | 2004       | Vorarlberg Health Monitoring and Promotion Programme               | Subnational                 | rural                                 | 18+   | 18+         | 20160 | 23893  |
| Azerbaijan     | 1996       | Health and Nutrition Survey                                        | National                    | both                                  | 19-59 | 19-59       | 121   | 295    |
| Azerbaijan     | 2001       | Reproductive Health Survey (RHS)                                   | National                    | both                                  |       | 18-44       |       | 1726   |
| Azerbaijan     | 2006       | DHS                                                                | National                    | both                                  | 18-59 | 18-49       | 2208  | 7044   |
| Bahrain        | 1991-1992  | al-Mannai et al., J R Soc Health 116:30-2, 7-40, 1996              | Community                   | both                                  | 20+   | 20+         | 137   | 153    |

| Country                | Data years | Survey/study name                                                                      | Level of representativeness | Age range as used for global analysis |        | Sample size |      |        |
|------------------------|------------|----------------------------------------------------------------------------------------|-----------------------------|---------------------------------------|--------|-------------|------|--------|
|                        |            |                                                                                        |                             | Rural, urban, or both                 | Male   | Female      | Male | Female |
| Bahrain                | 1998-1999  | National Nutrition Survey                                                              | National                    | both                                  | 19+    | 19+         | 1120 | 1181   |
| Bahrain                | 2007       | STEPS                                                                                  | National                    | both                                  | 20-64  | 20-64       | 854  | 858    |
| Bahrain                |            | Musaiger et al., Ann Hum Biol 28:346-50, 2001                                          | Community                   | both                                  | 30+    | 30+         | 298  | 216    |
| Bangladesh             | 1996-1997  | DHS                                                                                    | National                    | both                                  |        | 18-49       |      | 3761   |
| Bangladesh             | 1998       | Zaman et al., J Health Popul Nutr 21:162-63, 2003                                      | Community                   | rural                                 | 20+    | 20+         | 290  | 379    |
| Bangladesh             | 1999-2000  | Hussain et al., Eur J Public Health, 17:291-96, 2007                                   | Community                   | rural                                 | 20-59  | 20-59       | 2037 | 2720   |
| Bangladesh             | 1999-2000  | DHS                                                                                    | National                    | both                                  |        | 18-49       |      | 4324   |
| Bangladesh             | 2000-2004  | Nutritional Surveillance Project                                                       | National                    | rural                                 |        | 18-45       |      | 224251 |
| Bangladesh             | 2002       | STEPS                                                                                  | National                    | rural                                 | 25-64  | 25-64       | 2086 | 2038   |
| Bangladesh             | 2002       | STEPS                                                                                  | National                    | urban                                 | 25-64  | 25-64       | 3533 | 3737   |
| Bangladesh             | 2004       | DHS                                                                                    | National                    | both                                  |        | 18-49       |      | 9798   |
| Bangladesh             | 2007       | DHS                                                                                    | National                    | both                                  |        | 18-49       |      | 9669   |
| Bangladesh             | 2011       | DHS                                                                                    | National                    | both                                  | 18+    | 18+         | 5252 | 17642  |
| Bangladesh             |            | Rahman et al., Hypertension 33:74-8, 1999                                              | Community                   | rural                                 | 30+    | 30+         | 965  | 643    |
| Barbados               | 1987-1992  | Barbados Eye Study                                                                     | National                    | both                                  | 40-84  | 40-84       | 1980 | 2627   |
| Barbados               | 1991-1994  | Cooper et al., Am J Public Health 87(2):160-68, 1997                                   | Community                   | urban                                 | 25-100 | 25-100      | 329  | 482    |
| Barbados               | 1997-2002  | The Barbados Incidence Studies of Eye Diseases II                                      | National                    | both                                  | 40-84  | 40-84       | 1004 | 1441   |
| Barbados               | 1999-2000  | The Survey on Health, Well-Being, and Aging in Latin America and the Caribbean (SABE)  | Community                   | urban                                 | 60+    | 60+         | 559  | 866    |
| Belgium                | 1983-1985  | MONICA, Luxembourg                                                                     | Community                   | urban                                 | 35-64  | 35-64       | 944  | 936    |
| Belgium                | 1984-1985  | Belgian Interuniversity Research on Nutrition and Health                               | National                    | both                                  | 25-74  | 25-74       | 5897 | 5289   |
| Belgium                | 1985-1986  | INTERSALT, Ghent                                                                       | Community                   | urban                                 | 20-59  | 20-59       | 100  | 100    |
| Belgium                | 1985-1987  | INTERSALT, Charleroi                                                                   | Community                   | urban                                 | 20-59  | 20-59       | 82   | 75     |
| Belgium                | 1985-1987  | MONICA, Charleroi                                                                      | Community                   | urban                                 | 25-64  | 25-64       | 347  | 327    |
| Belgium                | 1985-1987  | MONICA, Ghent                                                                          | Community                   | urban                                 | 25-64  | 25-64       | 549  | 459    |
| Belgium                | 1985-1990  | Flemish Study on Environment, Genes and Health Outcomes                                | Community                   | rural                                 | 20-90  | 20-90       | 656  | 692    |
| Belgium                | 1987-1990  | MONICA, Charleroi                                                                      | Community                   | urban                                 | 25-64  | 25-64       | 325  | 301    |
| Belgium                | 1988-1990  | MONICA, Ghent                                                                          | Community                   | urban                                 | 25-64  | 25-64       | 456  | 449    |
| Belgium                | 1990-1992  | MONICA, Ghent                                                                          | Community                   | urban                                 | 25-64  | 25-64       | 507  | 475    |
| Belgium                | 1990-1993  | MONICA, Charleroi                                                                      | Community                   | urban                                 | 25-64  | 25-64       | 337  | 332    |
| Belgium                | 1991-1994  | Flemish Study on Environment, Genes and Health Outcomes                                | Community                   | rural                                 | 26-88  | 26-88       | 393  | 416    |
| Belgium                | 1992-1995  | Flemish Study on Environment, Genes and Health Outcomes                                | Community                   | rural                                 | 27-89  | 27-89       | 298  | 312    |
| Belgium                | 1994-1996  | BIRNH Elderly: Belgian Interuniversity Research on Nutrition and Health in the Elderly | National                    | both                                  | 65-89  | 65-89       | 1142 | 953    |
| Belgium                | 1996-1998  | Flemish Study on Environment, Genes and Health Outcomes                                | Community                   | rural                                 | 18-84  | 18-84       | 354  | 347    |
| Belgium                | 1998       | Flemish Study on Environment, Genes and Health Outcomes                                | Community                   | rural                                 | 32-86  | 32-86       | 320  | 349    |
| Belgium                | 1998-2000  | Flemish Study on Environment, Genes and Health Outcomes                                | Community                   | rural                                 | 18-80  | 18-80       | 198  | 196    |
| Belgium                | 1999-2001  | Flemish Study on Environment, Genes and Health Outcomes                                | Community                   | rural                                 | 18-81  | 18-81       | 213  | 227    |
| Belgium                | 2001       | Flemish Study on Environment, Genes and Health Outcomes                                | Community                   | rural                                 | 18-78  | 18-78       | 230  | 200    |
| Belgium                | 2002-2003  | Flemish Study on Environment, Genes and Health Outcomes                                | Community                   | rural                                 | 18-81  | 18-81       | 169  | 181    |
| Belgium                | 2002-2004  | SPAH                                                                                   | Subnational                 | both                                  | 18-75  | 18-75       | 2595 | 2308   |
| Belgium                | 2002-2005  | Flemish Study on Environment, Genes and Health Outcomes                                | Community                   | rural                                 | 18-88  | 18-88       | 391  | 404    |
| Belgium                | 2003       | The European Male Ageing Study                                                         | Community                   | both                                  | 40+    |             | 433  |        |
| Belgium                | 2005-2008  | Flemish Study on Environment, Genes and Health Outcomes                                | Community                   | rural                                 | 18-89  | 18-89       | 449  | 455    |
| Belgium                | 2008       | The European Male Ageing Study                                                         | Community                   | both                                  | 40+    |             | 383  |        |
| Belgium                | 2009-2013  | Flemish Study on Environment, Genes and Health Outcomes                                | Community                   | rural                                 | 20-88  | 20-88       | 330  | 335    |
| Belgium                | 2010-2015  | Flemish Study on Environment, Genes and Health Outcomes                                | Community                   | rural                                 | 18-87  | 18-87       | 388  | 409    |
| Belize                 | 2004-2005  | CAMDI                                                                                  | National                    | both                                  | 20+    | 20+         | 599  | 1019   |
| Benin                  | 1996       | DHS                                                                                    | National                    | both                                  |        | 18-49       |      | 2292   |
| Benin                  | 2001       | DHS                                                                                    | National                    | both                                  |        | 18-49       |      | 4787   |
| Benin                  | 2006       | DHS                                                                                    | National                    | both                                  |        | 18-49       |      | 13299  |
| Benin                  | 2007       | STEPS                                                                                  | Community                   | urban                                 | 25-64  | 25-64       | 955  | 1508   |
| Benin                  | 2008       | STEPS                                                                                  | National                    | both                                  | 25-64  | 25-64       | 3430 | 3365   |
| Benin                  | 2011-2012  | DHS                                                                                    | National                    | both                                  |        | 18-49       |      | 12836  |
| Bhutan                 | 2007       | STEPS                                                                                  | Community                   | urban                                 | 25-74  | 25-74       | 1125 | 1318   |
| Bhutan                 | 2014       | STEPS                                                                                  | National                    | both                                  | 18-69  | 18-69       | 1069 | 1674   |
| Bolivia                | 1994       | DHS                                                                                    | National                    | both                                  |        | 18-49       |      | 2286   |
| Bolivia                | 1998       | DHS                                                                                    | National                    | both                                  |        | 18-49       |      | 4126   |
| Bolivia                | 2003       | DHS                                                                                    | National                    | both                                  |        | 18-49       |      | 13974  |
| Bolivia                | 2005       | Reyes-Garcia et al., Soc Sci Med 69:571-78, 2009                                       | Community                   | rural                                 | 18-84  |             | 206  |        |
| Bolivia                | 2005-2007  | Baya Botti et al., Nutr Hosp 24(3):304-11, 2009                                        | National                    | both                                  | 18-18  | 18-18       | 137  | 131    |
| Bolivia                | 2008       | DHS                                                                                    | National                    | both                                  |        | 18-49       |      | 13497  |
| Bosnia and Herzegovina | 2002       | Non-communicable disease risk factor survey, Federation of B&H                         | Subnational                 | both                                  | 25-64  | 25-64       | 1118 | 1613   |



| Country                | Data years | Survey/study name                                                                         | Level of representativeness | Age range as used for global analysis |       | Sample size |       |        |
|------------------------|------------|-------------------------------------------------------------------------------------------|-----------------------------|---------------------------------------|-------|-------------|-------|--------|
|                        |            |                                                                                           |                             | Rural, urban, or both                 | Male  | Female      | Male  | Female |
| Bosnia and Herzegovina | 2012       | Non-communicable disease risk factor survey, Federation of B&H                            | Subnational                 | rural                                 | 18+   | 18+         | 1191  | 1274   |
| Bosnia and Herzegovina | 2012       | Non-communicable disease risk factor survey, Federation of B&H                            | Subnational                 | urban                                 | 18+   | 18+         | 591   | 697    |
| Botswana               | 2007       | STEPS                                                                                     | National                    | both                                  | 25-64 | 25-64       | 1243  | 2577   |
| Brazil                 | 1989       | Pesquisa Nacional sobre Saude e Nutricao                                                  | National                    | both                                  | 18+   | 18+         | 16783 | 17897  |
| Brazil                 | 1990-1991  | Fornes et al., Rev Saude Publica 36:12-8, 2002                                            | Community                   | urban                                 | 20+   | 20+         | 432   | 613    |
| Brazil                 | 1991-1993  | EPIDOSO                                                                                   | Community                   | urban                                 | 65+   | 65+         | 269   | 473    |
| Brazil                 | 1992-1998  | Moraes et al., Int J Cardiol 90:205-11, 2003                                              | Community                   | urban                                 | 18+   | 18+         | 438   | 543    |
| Brazil                 | 1995       | Health and Nutrition Survey of Rio de Janeiro                                             | Community                   | urban                                 | 60+   | 60+         | 248   | 385    |
| Brazil                 | 1995-1996  | Cohort study from Porto Alegre                                                            | Community                   | both                                  | 18+   | 18+         | 489   | 596    |
| Brazil                 | 1996       | DHS                                                                                       | National                    | both                                  |       | 18-49       |       | 3081   |
| Brazil                 | 1996-1997  | The Bambui Cohort Study of Ageing                                                         | Community                   | urban                                 | 18+   | 18+         | 931   | 1335   |
| Brazil                 | 1997       | PPV                                                                                       | Subnational                 | both                                  | 20+   | 20+         | 8063  | 9121   |
| Brazil                 | 1998       | Belo Horizonte Heart Study                                                                | Community                   | urban                                 | 18-19 | 18-19       | 31    | 43     |
| Brazil                 | 1999-2000  | Pelotas cross-sectional survey                                                            | Community                   | urban                                 | 20-69 | 20-69       | 839   | 1096   |
| Brazil                 | 1999-2000  | The Survey on Health, Well-Being, and Aging in Latin America and the Caribbean (SABE)     | Community                   | urban                                 | 60+   | 60+         | 732   | 1064   |
| Brazil                 | 2001       | de Freitas et al., Arq Bras Cardiol 88:191-99                                             | Community                   | urban                                 | 18+   | 18+         | 310   | 331    |
| Brazil                 | 2001-2003  | Bustos et al., Nutr Metab Cardiovasc Dis 17:581-89, 2007                                  | Community                   | both                                  | 22-28 | 22-28       | 992   | 1064   |
| Brazil                 | 2002-2003  | Pesquisa de Orcamentos Familiares                                                         | National                    | both                                  | 18+   | 18+         | 55681 | 56389  |
| Brazil                 | 2003       | PNAFS                                                                                     | Community                   | urban                                 | 20+   | 20+         | 1155  | 1941   |
| Brazil                 | 2003       | Women health in Southern Brazil                                                           | Community                   | urban                                 |       | 20-60       |       | 986    |
| Brazil                 | 2003-2005  | São Paulo Health & Ageing Study                                                           | Community                   | urban                                 | 65+   | 65+         | 783   | 1198   |
| Brazil                 | 2004-2005  | Pimenta et al., Arq Bras Cardiol 88:386-92, 2008                                          | Community                   | rural                                 | 18+   | 18-84       | 291   | 286    |
| Brazil                 | 2004-2006  | Hearts of Brazil                                                                          | National                    | urban                                 | 18+   | 18+         | 550   | 626    |
| Brazil                 | 2006       | Krause et al., J Aging Phys Act 17:387-97, 2009                                           | Community                   | urban                                 | 60+   | 60+         | 93    | 1069   |
| Brazil                 | 2006       | ATITUDE                                                                                   | Subnational                 | both                                  | 18-21 | 18-21       | 1325  | 1734   |
| Brazil                 | 2006       | Pesquisa Nacional de Demografia e Saude 2006                                              | National                    | both                                  |       | 18-49       |       | 13375  |
| Brazil                 | 2006-2007  | SOFT study                                                                                | Community                   | urban                                 | 18+   | 18+         | 739   | 1099   |
| Brazil                 | 2008       | The Bambui Cohort Study of Ageing                                                         | Community                   | urban                                 | 71+   | 71+         | 248   | 456    |
| Brazil                 | 2008-2009  | Pesquisa de Orcamentos Familiares                                                         | National                    | both                                  | 18+   | 18+         | 62035 | 65691  |
| Brazil                 | 2009-2010  | EPIFLORIPA Adults                                                                         | Community                   | urban                                 | 25-59 | 25-59       | 631   | 795    |
| Brazil                 | 2009-2010  | Condições de Saúde de Idosos de Florianópolis - EpiFloripa Idoso                          | Community                   | urban                                 | 60+   | 60+         | 594   | 1052   |
| Brazil                 | 2010-2013  | Baependi Heart Study                                                                      | Community                   | rural                                 | 18+   | 18+         | 607   | 884    |
| Brazil                 | 2011       | ATITUDE                                                                                   | Subnational                 | both                                  | 18-19 | 18-19       | 688   | 844    |
| Brazil                 | 2012-2013  | Prevalence of Leptin Polymorphism Gln223Arg                                               | Community                   | urban                                 | 18+   | 18+         | 282   | 523    |
| Brazil                 | 2014       | Brazilian Guide to the Physical Fitness related to Health Assessment and Lifestyle Habits | Community                   | urban                                 | 18-19 | 18-19       | 73    | 45     |
| Bulgaria               | 2004       | National Nutrition Survey                                                                 | National                    | both                                  | 18+   | 18+         | 515   | 515    |
| Burkina Faso           | 1992-1993  | DHS                                                                                       | National                    | both                                  |       | 18-49       |       | 3410   |
| Burkina Faso           | 1998-1999  | DHS                                                                                       | National                    | both                                  |       | 18-49       |       | 3300   |
| Burkina Faso           | 2003       | DHS                                                                                       | National                    | both                                  |       | 18-49       |       | 9360   |
| Burkina Faso           | 2004       | Ouedraogo et al., Public Health Nutr 11:1280-87, 2008                                     | Community                   | urban                                 | 35+   | 35+         | 956   | 1066   |
| Burkina Faso           | 2010       | DHS                                                                                       | National                    | both                                  |       | 18-49       |       | 6730   |
| Burkina Faso           | 2013       | STEPS                                                                                     | National                    | both                                  | 25-64 | 25-64       | 2223  | 2250   |
| Burundi                | 2010       | DHS                                                                                       | National                    | both                                  |       | 18-49       |       | 3471   |
| Cabo Verde             | 2007       | STEPS                                                                                     | National                    | both                                  | 25-64 | 25-64       | 658   | 1066   |
| Cambodia               | 2000       | DHS                                                                                       | National                    | both                                  |       | 18-49       |       | 5888   |
| Cambodia               | 2005       | DHS                                                                                       | National                    | both                                  |       | 18-49       |       | 6952   |
| Cambodia               | 2008       | Anthropometrics Survey                                                                    | National                    | both                                  |       | 18-49       |       | 5955   |
| Cambodia               | 2010       | DHS                                                                                       | National                    | both                                  |       | 18-49       |       | 7650   |
| Cambodia               | 2010       | STEPS                                                                                     | National                    | both                                  | 25-64 | 25-64       | 1881  | 3343   |
| Cameroon               | 1998       | DHS                                                                                       | National                    | both                                  |       | 18-49       |       | 1574   |
| Cameroon               | 1998-1999  | ENHIP                                                                                     | Community                   | rural                                 | 18+   | 18+         | 490   | 683    |
| Cameroon               | 1998-1999  | ENHIP                                                                                     | Community                   | urban                                 | 18+   | 18+         | 431   | 538    |
| Cameroon               | 2003       | STEPS                                                                                     | Subnational                 | urban                                 | 18+   | 18+         | 3331  | 4991   |
| Cameroon               | 2004       | DHS                                                                                       | National                    | both                                  |       | 18-49       |       | 3924   |
| Cameroon               | 2007       | Cameroon Burden of Diabetes - Second Survey                                               | Subnational                 | urban                                 | 18+   | 18+         | 3122  | 4123   |
| Cameroon               | 2009       | National Survey of Micronutrient Status and Consumption of Fortifiable Foods              | National                    | both                                  |       | 18-49       |       | 788    |
| Cameroon               | 2011       | DHS                                                                                       | National                    | both                                  |       | 18-49       |       | 6281   |
| Canada                 | 1981       | Canada Fitness Survey                                                                     | National                    | both                                  | 18-64 | 18-64       | 5133  | 5774   |
| Canada                 | 1985-1986  | INTERSAL, St Johns                                                                        | Community                   | urban                                 | 20-59 | 20-59       | 100   | 100    |
| Canada                 | 1985-1988  | MONICA, Halifax                                                                           | Community                   | both                                  | 25-64 | 25-64       | 438   | 420    |
| Canada                 | 1986-1992  | Canada Heart Health Survey                                                                | National                    | both                                  | 18-74 | 18-74       | 9644  | 9777   |

| Country                  | Data years | Survey/study name                                                                     | Level of representativeness | Age range as used for global analysis |       | Sample size |          |          |
|--------------------------|------------|---------------------------------------------------------------------------------------|-----------------------------|---------------------------------------|-------|-------------|----------|----------|
|                          |            |                                                                                       |                             | Rural, urban, or both                 | Male  | Female      | Male     | Female   |
| Canada                   | 1991-1992  | Canadian Study of Health and Aging                                                    | Community                   | both                                  | 70+   | 70+         | 236      | 348      |
| Canada                   | 1993       | Chen et al., Int J Obes Relat Metab Disord 22:771-77, 1998                            | Community                   | rural                                 | 18-74 | 18-74       | 803      | 988      |
| Canada                   | 1995       | MONICA, Halifax                                                                       | Community                   | both                                  | 25-64 | 25-64       | 274      | 287      |
| Canada                   | 1995-1997  | CaMos                                                                                 | Subnational                 | both                                  | 25+   | 25+         | 2792     | 6302     |
| Canada                   | 1996       | Canadian Study of Health and Aging                                                    | Community                   | both                                  | 70+   | 70+         | 236      | 348      |
| Canada                   | 2005       | CCHS                                                                                  | National                    | both                                  | 18+   | 18+         | 1684.112 | 2030.825 |
| Canada                   | 2007-2011  | Canadian Health Measures Survey                                                       | National                    | both                                  | 18-79 | 18-79       | 3528     | 3994     |
| Canada                   | 2008       | CCHS                                                                                  | National                    | both                                  | 18+   | 18+         | 1689.482 | 1987.779 |
| Canada                   |            | PEI Nutrition Survey                                                                  | Subnational                 | both                                  | 18-74 | 18-74       | 1000     | 995      |
| Central African Republic | 1994-1995  | DHS                                                                                   | National                    | both                                  | 18-49 | 18-49       |          | 1945     |
| Central African Republic | 2010       | STEPS                                                                                 | Community                   | both                                  | 25-64 | 25-64       | 1846     | 1967     |
| Chad                     | 1996-1997  | DHS                                                                                   | National                    | both                                  |       | 18-49       |          | 3581     |
| Chad                     | 2004       | DHS                                                                                   | National                    | both                                  |       | 18-49       |          | 2840     |
| Chad                     | 2008       | STEPS                                                                                 | Community                   | urban                                 | 25-64 | 25-64       | 995      | 845      |
| Chile                    | 1989       | INCLEN                                                                                | Community                   | urban                                 | 35-65 |             | 199      |          |
| Chile                    | 1992-1993  | Miquel et al., Gastroenterology 115: 937-46, 1998                                     | Community                   | urban                                 | 18+   | 18+         | 657      | 1031     |
| Chile                    | 1999-2000  | The Survey on Health, Well-Being, and Aging in Latin America and the Caribbean (SABE) | Community                   | urban                                 | 60+   | 60+         | 410      | 806      |
| Chile                    | 2000       | Nervi et al., J Hepatol 45: 299-305, 2006                                             | Community                   | urban                                 | 18+   | 18+         | 335      | 624      |
| Chile                    | 2001-2003  | Bustos et al., Nutr Metab Cardiovasc Dis 17:581-89, 2007                              | Community                   | both                                  | 22-28 | 22-28       | 436      | 562      |
| Chile                    | 2003       | Encuesta Nacional de Salud                                                            | National                    | both                                  | 18+   | 18+         | 1545     | 1849     |
| Chile                    | 2004-2005  | Cardiovascular Risk factors Multiple Evaluation in Latin America                      | Community                   | urban                                 | 25-64 | 25-64       | 783      | 865      |
| Chile                    | 2005       | Palomo et al., Rev Med Chil 135:904-12, 2007                                          | Community                   | urban                                 | 18-74 | 18-74       | 339      | 668      |
| Chile                    | 2009-2010  | Encuesta Nacional de Salud                                                            | National                    | both                                  | 18+   | 18+         | 1871     | 2833     |
| Chile                    | 2011-2012  | CECSCAS Study                                                                         | Community                   | urban                                 | 35-74 | 35-74       | 922      | 1027     |
| Chile                    | 2013       | Global School-based Student Health Survey                                             | National                    | both                                  | 18-19 | 18-19       | 82       | 55       |
| China                    | 1979-1982  | East Beijing Study 1                                                                  | Community                   | urban                                 | 20-84 | 20-84       | 361      | 380      |
| China                    | 1982       | China National Nutritional Survey                                                     | National                    | both                                  | 18-94 | 18-94       | 8918     | 8753     |
| China                    | 1983       | Sino-MONICA Shanghai                                                                  | Subnational                 | both                                  | 30-64 | 30-64       | 624      | 630      |
| China                    | 1983-1984  | Wang et al., Zhonghua Liu Xing Bing Xue Za Zhi 24:272-75, 2003                        | Community                   | both                                  | 25-64 | 25-64       | 877      | 832      |
| China                    | 1984-1985  | MONICA, Beijing                                                                       | Community                   | both                                  | 25-64 | 25-64       | 813      | 856      |
| China                    | 1984-1985  | Sino-MONICA Beijing                                                                   | Subnational                 | both                                  | 25-64 | 25-64       | 813      | 857      |
| China                    | 1986       | INTERSALT, Beijing                                                                    | Community                   | urban                                 | 20-59 | 20-59       | 100      | 100      |
| China                    | 1986       | INTERSALT, Nanning                                                                    | Community                   | both                                  | 20-59 | 20-59       | 100      | 100      |
| China                    | 1986       | INTERSALT, Tianjin                                                                    | Community                   | urban                                 | 20-59 | 20-59       | 100      | 100      |
| China                    | 1986-1989  | Ewang et al., Zhonghua Liu Xing Bing Xue Za Zhi 26:394-9, 2005                        | Community                   | both                                  | 45-64 |             | 18244    |          |
| China                    | 1986-1989  | Sino-MONICA Shanghai                                                                  | Subnational                 | both                                  | 25-64 | 25-64       | 675      | 753      |
| China                    | 1987       | INCLEN                                                                                | Community                   | urban                                 | 35-65 |             | 989      |          |
| China                    | 1988       | Sino-MONICA Hebei                                                                     | Subnational                 | both                                  | 25-64 |             | 800      |          |
| China                    | 1988       | Sino-MONICA Heilongjiang                                                              | Subnational                 | both                                  | 25-64 | 25-64       | 800      | 800      |
| China                    | 1988       | Sino-MONICA Henan                                                                     | Subnational                 | both                                  | 25-64 | 25-64       | 345      | 427      |
| China                    | 1988       | Sino-MONICA Neimenggu                                                                 | Subnational                 | both                                  | 25-64 | 25-64       | 396      | 400      |
| China                    | 1988       | Sino-MONICA Sichuan                                                                   | Subnational                 | both                                  | 25-64 | 25-64       | 312      | 334      |
| China                    | 1988       | Sino-MONICA Shandong                                                                  | Subnational                 | both                                  | 25-64 | 25-64       | 211      | 225      |
| China                    | 1988-1989  | Wang et al., Zhonghua Liu Xing Bing Xue Za Zhi 24:272-75, 2003                        | Community                   | both                                  | 25-64 | 25-64       | 873      | 731      |
| China                    | 1988-1989  | MONICA, Beijing                                                                       | Community                   | both                                  | 25-64 | 25-64       | 701      | 862      |
| China                    | 1988-1989  | Sino-MONICA Beijing                                                                   | Subnational                 | both                                  | 25-64 | 25-64       | 701      | 862      |
| China                    | 1988-1989  | Sino-MONICA Jilin                                                                     | Subnational                 | both                                  | 25-64 | 25-64       | 380      | 400      |
| China                    | 1988-1989  | Sino-MONICA Jiangxi                                                                   | Subnational                 | both                                  | 25-64 | 25-64       | 379      | 386      |
| China                    | 1988-1989  | Sino-MONICA Liaoning                                                                  | Subnational                 | both                                  | 25-64 | 25-64       | 728      | 734      |
| China                    | 1988-1990  | East Beijing Study 2                                                                  | Community                   | urban                                 | 20-84 | 20-84       | 135      | 148      |
| China                    | 1989       | The Tianjin Project                                                                   | Community                   | urban                                 | 18-64 | 18-64       | 3894     | 3971     |
| China                    | 1989†      | China Health and Nutrition Survey                                                     | National                    | both                                  | 18-45 | 18-45       | 2356     | 2549     |
| China                    | 1989       | Sino-MONICA Fujian                                                                    | Subnational                 | both                                  | 25-64 | 25-64       | 179      | 191      |
| China                    | 1989       | Sino-MONICA Jiangsu                                                                   | Subnational                 | both                                  | 25-64 | 25-64       | 398      | 399      |
| China                    | 1990-1991  | China Prospective Study                                                               | National                    | both                                  | 40-79 |             | 221194   |          |
| China                    | 1991       | China National Hypertension Survey Epidemiology Follow-up Study                       | National                    | both                                  | 40+   | 40+         | 75696    | 79040    |
| China                    | 1991†      | China Health and Nutrition Survey                                                     | National                    | both                                  | 18+   | 18+         | 4047     | 4470     |
| China                    | 1991       | Sino-MONICA Shanghai                                                                  | Subnational                 | both                                  | 30-64 | 30-64       | 564      | 624      |
| China                    | 1991-1992  | Fangshan Cohort Study                                                                 | Community                   | urban                                 | 34-86 | 34-86       | 871      | 1736     |
| China                    | 1992       | Huashan Study                                                                         | Community                   | urban                                 | 35-75 | 35-75       | 892      | 965      |
| China                    | 1992       | China National Nutritional Survey                                                     | National                    | both                                  | 18-92 | 18-92       | 23814    | 27157    |

| Country               | Data years | Survey/study name                                                                            | Level of representativeness | Age range as used for global analysis |        | Sample size |         |         |
|-----------------------|------------|----------------------------------------------------------------------------------------------|-----------------------------|---------------------------------------|--------|-------------|---------|---------|
|                       |            |                                                                                              |                             | Rural, urban, or both                 | Male   | Female      | Male    | Female  |
| China                 | 1992       | Sino-MONICA Sichuan                                                                          | Subnational                 | both                                  | 25-64  | 25-64       | 608     | 526     |
| China                 | 1992-1993  | Anzhen 02 Cohort Study                                                                       | Community                   | urban                                 | 34-65  | 34-65       | 2032    | 2120    |
| China                 | 1993       | Wang et al., Zhonghua Liu Xing Bing Xue Za Zhi 24:272-75, 2003                               | Community                   | both                                  | 25-64  | 25-64       | 822     | 617     |
| China                 | 1993†      | China Health and Nutrition Survey                                                            | National                    | both                                  | 18+    | 18+         | 3864    | 4235    |
| China                 | 1993       | MONICA, Beijing                                                                              | Community                   | both                                  | 25-64  | 25-64       | 613     | 816     |
| China                 | 1993       | Sino-MONICA Anhui                                                                            | Subnational                 | both                                  | 25-64  | 25-64       | 193     | 195     |
| China                 | 1993       | Sino-MONICA Beijing                                                                          | Subnational                 | both                                  | 25-64  | 25-64       | 613     | 816     |
| China                 | 1993       | Sino-MONICA Jiangsu                                                                          | Subnational                 | both                                  | 25-64  | 25-64       | 462     | 365     |
| China                 | 1993       | Sino-MONICA Liaoning                                                                         | Subnational                 | both                                  | 25-64  | 25-64       | 493     | 500     |
| China                 | 1996       | Wang et al., Zhonghua Liu Xing Bing Xue Za Zhi 24:272-75, 2003                               | Community                   | both                                  | 25-64  | 25-64       | 735     | 721     |
| China                 | 1996       | The Tianjin Project                                                                          | Community                   | urban                                 | 18-64  | 18-64       | 722     | 717     |
| China                 | 1996-2003  | Wu et al., Osteoporos Int 15:751-59, 2004                                                    | Community                   | urban                                 |        | 18+         |         | 3418    |
| China                 | 1997†      | China Health and Nutrition Survey                                                            | National                    | both                                  | 18+    | 18+         | 4164    | 4401    |
| China                 | 1997       | International collaborative study of macronutrients, micronutrients and blood pressure       | Community                   | rural                                 | 40-59  | 40-59       | 133     | 139     |
| China                 | 1997       | International collaborative study of macronutrients, micronutrients and blood pressure       | Community                   | rural                                 | 40-59  | 40-59       | 140     | 138     |
| China                 | 1997       | International collaborative study of macronutrients, micronutrients and blood pressure       | Community                   | rural                                 | 40-59  | 40-59       | 143     | 146     |
| China                 | 1997-2000  | Shanghai Women's Study                                                                       | Community                   | urban                                 |        | 40-70       |         | 74881   |
| China                 | 1998       | Shanghai Diabetes Study                                                                      | Community                   | urban                                 | 25+    | 25+         | 1264    | 1768    |
| China                 | 1998-2000  | Jia et al., Obes Rev 3:157-65, 2002                                                          | Community                   | urban                                 | 20+    | 20+         | 1106    | 1670    |
| China                 | 1999       | Wang et al., Zhonghua Liu Xing Bing Xue Za Zhi 24:272-75, 2003                               | Community                   | both                                  | 25-64  | 25-64       | 818     | 685     |
| China                 | 1999-2000  | Xu et al., Public Health Nutr 8:47-51, 2005                                                  | Community                   | both                                  | 35+    | 35+         | 18194   | 18902   |
| China                 | 2000†      | China Health and Nutrition Survey                                                            | National                    | both                                  | 18+    | 18+         | 4515    | 4934    |
| China                 | 2000-2001  | The International Collaborative Study of Cardiovascular Disease in ASIA                      | National                    | both                                  | 35-74  | 35-74       | 7511    | 8006    |
| China                 | 2001       | Shanghai Diabetes Study                                                                      | Community                   | urban                                 | 25+    | 25+         | 1264    | 1768    |
| China                 | 2001-2006  | Shanghai Men's Study                                                                         | Community                   | urban                                 | 40-74  |             | 61392   |         |
| China                 | 2002       | Ma et al., Zhonghua Liu Xing Bing Xue Za Zhi 25:1035-8, 2004                                 | Subnational                 | both                                  | 18+    | 18+         | 7352    | 7352    |
| China                 | 2002       | China National Nutritional and Health Survey                                                 | National                    | both                                  | 18-101 | 18-101      | 64630   | 75015   |
| China                 | 2002-2003  | Fan et al., J Gastroenterol Hepatol 20:1825-32, 2005                                         | Community                   | urban                                 | 18+    | 18-74       | 5502    | 7767    |
| China                 | 2002-2006  | SMHS                                                                                         | Community                   | urban                                 | 40-65  |             | 48018   |         |
| China                 | 2004       | Tian et al., Prev Med 48:59-63, 2009                                                         | Community                   | rural                                 | 18+    | 18+         | 1022669 | 1163313 |
| China                 | 2004       | Beijing Child and Adolescent Metabolic Syndrome study                                        | Community                   | both                                  | 18-18  | 18-18       | 248     | 258     |
| China                 | 2004†      | China Health and Nutrition Survey                                                            | National                    | both                                  | 18+    | 18+         | 4345    | 4748    |
| China                 | 2004-2006  | Pang et al., Intern Med 47:893-97, 2008                                                      | Community                   | rural                                 | 35+    | 35+         | 22963   | 22962   |
| China                 | 2004-2008  | Xinjiang Children and Adolescent Survey                                                      | Subnational                 | both                                  | 18-18  | 18-18       | 113     | 123     |
| China                 | 2005       | Ye et al., J Am Coll Cardiol 49:1798-805, 2007                                               | Community                   | urban                                 | 50-70  | 50-70       | 743     | 906     |
| China                 | 2005-2006  | Zhou et al., World J Gastroenterol 13:6419-24, 2007                                          | Community                   | urban                                 | 18-79  | 18-79       | 1101    | 2063    |
| China                 | 2005-2006  | Hong Kong Growth Survey                                                                      | Subnational                 | both                                  | 18-19  | 18-19       | 920     | 951     |
| China                 | 2006       | Beijing Eye Study                                                                            | Community                   | both                                  | 45+    | 45+         | 1394    | 1820    |
| China                 | 2006†      | China Health and Nutrition Survey                                                            | National                    | both                                  | 18+    | 18+         | 4250    | 4781    |
| China                 | 2007       | Beijing Child and Adolescent Metabolic Syndrome study                                        | Community                   | urban                                 | 18-18  | 18-18       | 20      | 18      |
| China                 | 2007-2008  | China National Diabetes & Metabolic Disorders Study                                          | National                    | both                                  | 20+    | 20+         | 18419   | 27820   |
| China                 | 2007-2010  | SAGE                                                                                         | National                    | both                                  | 50+    | 50+         | 5759    | 6617    |
| China                 | 2008-2010  | Fangshan Family-based Ischemic Stroke Study in China (FISSIC) program                        | Community                   | rural                                 | 40+    | 40+         | 19478   | 36449   |
| China                 | 2009†      | China Health and Nutrition Survey                                                            | National                    | both                                  | 18+    | 18+         | 4489    | 4936    |
| China                 | 2010       | China Noncommunicable Disease Surveillance                                                   | National                    | both                                  | 18+    | 18+         | 45066   | 53452   |
| China                 | 2011       | Beijing Eye Study                                                                            | Community                   | both                                  | 50+    | 50+         | 1467    | 1895    |
| China                 | 2011       | Beijing Pediatric Eye Study                                                                  | Community                   | both                                  | 18-18  | 18-18       | 615     | 588     |
| China                 | 2011†      | China Health and Nutrition Survey                                                            | National                    | both                                  | 18+    | 18+         | 5886    | 6645    |
| China                 | 2011       | Nutrition and Health of Aging Population in China                                            | Community                   | both                                  | 55-77  | 55-77       | 952     | 1296    |
| China                 | 2012       | Shandong Children Study                                                                      | Community                   | rural                                 | 18-18  | 18-18       | 53      | 44      |
| China                 | 2012       | Shandong Children Study                                                                      | Community                   | urban                                 | 18-18  |             |         | 4       |
| China                 | 2012-2013  | The Kailuan Study                                                                            | Community                   | urban                                 | 18+    | 18+         | 80921   | 21385   |
| China                 | 2013       | Ejina Children Study                                                                         | Community                   | both                                  | 18-21  | 18-21       | 28      | 25      |
| China                 |            | Hua et al., Zhonghua Nei Ke Za Zhi 36:18-20, 1997                                            | Community                   | rural                                 | 60+    | 60+         | 288     | 335     |
| China                 |            | Chen et al., Zhonghua Yi Xue Za Zhi 85(40):2830-4, 2005                                      | Subnational                 | both                                  | 35-85  | 35-85       | 13549   | 10315   |
| China (Hong Kong SAR) | 1985-1986  | Shatin New Town Study                                                                        | Community                   | urban                                 | 70+    | 70+         | 276     | 669     |
| China (Hong Kong SAR) | 1991       | The Hong Kong study on Health, health risk and quality of life in the Chinese elderly cohort | Community                   | both                                  | 70+    | 70+         | 943     | 944     |
| China (Hong Kong SAR) | 1995-1996  | Hong Kong Cardiovascular Risk Factor Prevalence Study 1995-1996                              | National                    | both                                  | 25-74  | 25-74       | 1412    | 1478    |
| Colombia              | 1986       | INTERSALT                                                                                    | Community                   | rural                                 | 20-59  | 20-59       | 96      | 95      |
| Colombia              | 1995       | DHS                                                                                          | National                    | both                                  |        | 18-49       |         | 3242    |
| Colombia              | 2000       | DHS                                                                                          | National                    | both                                  |        | 18-49       |         | 3158    |

| Country        | Data years | Survey/study name                                                                     | Level of representativeness | Age range as used for global analysis |        | Sample size |         |         |
|----------------|------------|---------------------------------------------------------------------------------------|-----------------------------|---------------------------------------|--------|-------------|---------|---------|
|                |            |                                                                                       |                             | Rural, urban, or both                 | Male   | Female      | Male    | Female  |
| Colombia       | 2001       | CINDI/CARMEN - Bucaramaga                                                             | Community                   | urban                                 | 18-74  | 18-74       | 627     | 1218    |
| Colombia       | 2002       | CINDI/CARMEN - Bogota                                                                 | Community                   | urban                                 | 18-74  | 18-74       | 322     | 570     |
| Colombia       | 2004-2005  | CArdiovascular Risk factors Multiple Evaluation in Latin America                      | Community                   | urban                                 | 25-64  | 25-64       | 738     | 812     |
| Colombia       | 2005       | DHS                                                                                   | National                    | both                                  | 18-64  | 18-64       | 25094   | 38620   |
| Colombia       | 2005       | Encuesta Nacional de Situacion Nutricional                                            | National                    | both                                  |        | 18-49       |         | 2783    |
| Colombia       | 2007       | Encuesta Nacional de Salud                                                            | National                    | both                                  | 18-69  | 18-69       | 5462    | 7686    |
| Colombia       | 2010       | DHS                                                                                   | National                    | both                                  | 18-64  | 18-64       | 39546   | 51623   |
| Colombia       | 2010       | STEPS                                                                                 | Subnational                 | both                                  | 18-64  | 18-64       | 922     | 1239    |
| Comoros        | 1996       | DHS                                                                                   | National                    | both                                  |        | 18-49       |         | 773     |
| Comoros        | 2011       | STEPS                                                                                 | National                    | both                                  | 25-64  | 25-64       | 1541    | 3500    |
| Comoros        | 2012       | DHS                                                                                   | National                    | both                                  |        | 18-49       |         | 4105    |
| Congo          | 1986       | Maire et al., Rev Epidemiol Sante Publique 40:252-58, 1992                            | Community                   | urban                                 |        | 18-45       |         | 558     |
| Congo          | 1986       | Enquête Brazzaville 1986                                                              | Community                   | urban                                 |        | 18-50       |         | 935     |
| Congo          | 1987       | Maire et al., Rev Epidemiol Sante Publique 40:252-58, 1992                            | Community                   | rural                                 |        | 18-45       |         | 750     |
| Congo          | 1987       | Enquête Nationale Congo 1987                                                          | National                    | rural                                 |        | 18-49       |         | 1264    |
| Congo          | 1991       | Enquête Brazzaville 1991                                                              | Community                   | urban                                 | 18-90  | 18-90       | 1200    | 1806    |
| Congo          | 1996       | Enquête Brazzaville 1996                                                              | Community                   | urban                                 | 18-90  | 18-90       | 1346    | 1818    |
| Congo          | 2004       | STEPS                                                                                 | Community                   | urban                                 | 25-64  | 25-64       | 1013    | 956     |
| Congo          | 2005       | DHS                                                                                   | National                    | both                                  |        | 18-49       |         | 5390    |
| Congo          | 2011-2012  | DHS                                                                                   | National                    | both                                  |        | 18-49       |         | 4415    |
| Cook Islands   | 2003       | STEPS                                                                                 | National                    | both                                  | 25-64  | 25-64       | 925     | 958     |
| Costa Rica     | 2004       | CAMDI                                                                                 | Community                   | urban                                 | 20+    | 20+         | 304     | 624     |
| Costa Rica     | 2004-2006  | Costa Rican Longevity and Healthy Aging Study Pre-1945 Cohort Wave 1                  | National                    | both                                  | 60+    | 60+         | 1163    | 1350    |
| Costa Rica     | 2006-2008  | Costa Rican Longevity and Healthy Aging Study Pre-1945 Cohort Wave 2                  | National                    | both                                  | 62+    | 62+         | 944     | 1102    |
| Costa Rica     | 2008-2009  | Encuesta Nacional de Nutricion 2008-2009                                              | National                    | both                                  |        | 45+         |         | 661     |
| Costa Rica     | 2009-2010  | Costa Rican Longevity and Healthy Aging Study Pre-1945 Cohort Wave 3                  | National                    | both                                  | 64+    | 64+         | 737     | 890     |
| Costa Rica     | 2010-2011  | Costa Rican Longevity and Healthy Aging Study 1945-1955 Cohort Wave 1                 | National                    | both                                  | 54-66  | 54-66       | 1058    | 1676    |
| Costa Rica     | 2012-2014  | Costa Rican Longevity and Healthy Aging Study 1945-1955 Cohort Wave 2                 | National                    | both                                  | 56-68  | 56-68       | 867     | 1470    |
| Cote d'Ivoire  | 1994       | DHS                                                                                   | National                    | both                                  |        | 18-49       |         | 2981    |
| Cote d'Ivoire  | 1998-1999  | DHS                                                                                   | National                    | both                                  |        | 18-49       |         | 2278    |
| Cote d'Ivoire  | 2005       | STEPS                                                                                 | National                    | rural                                 | 18-64  | 18-64       | 853     | 963     |
| Cote d'Ivoire  | 2005       | STEPS                                                                                 | National                    | urban                                 | 18-64  | 18-64       | 982     | 1289    |
| Cote d'Ivoire  | 2011-2012  | DHS                                                                                   | National                    | both                                  |        | 18-49       |         | 4023    |
| Croatia        | 1997-1999  | Budak A et al., Lijec Vjesn 125(1-2):32-5, 2003                                       | National                    | both                                  | 25-100 | 25-100      | 1763    | 2684    |
| Croatia        | 2006-2008  | The Cardiovascular risk factors in school age – intervention model development        | National                    | both                                  | 18-20  | 18-20       | 190     | 202     |
| Cuba           | 1981-1982  | Berdasco, Eur J Clin Nutr 1994; 48 Suppl 3:S155-63; discussion S64, 1994              | Subnational                 | both                                  | 20-59  | 20-59       | 11355   | 18708   |
| Cuba           | 1999-2000  | The Survey on Health, Well-Being, and Aging in Latin America and the Caribbean (SABE) | Community                   | urban                                 | 60+    | 60+         | 630     | 1044    |
| Cuba           | 2001-2002  | National Survey of Risk Factors                                                       | National                    | both                                  | 20-60  | 20-60       | 11425.5 | 11425.5 |
| Cuba           | 2010       | National Risk Factor Survey                                                           | National                    | both                                  | 18+    | 18+         | 3200    | 3731    |
| Cuba           | 2011       | Non communicable disease risk factor in Cienfuegos                                    | Community                   | urban                                 | 18-80  | 18-80       | 593     | 849     |
| Cyprus         | 1999-2000  | Countrywide Integrated Noncommunicable Diseases Intervention Programme Cyprus         | National                    | both                                  | 25-65  | 25-65       | 457     | 546     |
| Cyprus         | 2007-2008  | Asthma Study Cyprus                                                                   | National                    | both                                  | 18-18  | 18-18       | 13      | 22      |
| Czech Republic | 1985       | Czech-MONICA                                                                          | National                    | both                                  | 25-64  | 25-64       | 1243    | 1303    |
| Czech Republic | 1988       | Czech-MONICA                                                                          | National                    | both                                  | 25-64  | 25-64       | 1357    | 1408    |
| Czech Republic | 1992       | Czech-MONICA                                                                          | National                    | both                                  | 25-64  | 25-64       | 1131    | 1207    |
| Czech Republic | 1997-1998  | post-Czech-MONICA                                                                     | National                    | both                                  | 25-64  | 25-64       | 1527    | 1665    |
| Czech Republic | 2000-2001  | post-Czech-MONICA                                                                     | National                    | both                                  | 25-64  | 25-64       | 1628    | 1690    |
| Czech Republic | 2002-2005  | Health, Alcohol and Psychosocial factors in Eastern Europe                            | Subnational                 | urban                                 | 45-69  | 45-69       | 3247    | 3888    |
| Czech Republic | 2007-2008  | post-Czech-MONICA                                                                     | National                    | both                                  | 25-64  | 25-64       | 1717    | 1861    |
| Denmark        | 1972*      | The Danish Conscript Database                                                         | National                    | both                                  | 18-26  |             |         | 22013   |
| Denmark        | 1973*      | The Danish Conscript Database                                                         | National                    | both                                  | 18-26  |             |         | 13980   |
| Denmark        | 1974*      | The Danish Conscript Database                                                         | National                    | both                                  | 18-26  |             |         | 14824   |
| Denmark        | 1974-1975  | Drivsholm et al., Diabet Med 18:126-32, 2001                                          | Subnational                 | urban                                 | 60     | 60          | 360     | 306     |
| Denmark        | 1975       | The Danish Conscript Database                                                         | National                    | both                                  | 18-26  |             |         | 21359   |
| Denmark        | 1976       | The Danish Conscript Database                                                         | National                    | both                                  | 18-26  |             |         | 27366   |
| Denmark        | 1977       | The Danish Conscript Database                                                         | National                    | both                                  | 18-26  |             |         | 25629   |
| Denmark        | 1978       | The Danish Conscript Database                                                         | National                    | both                                  | 18-26  |             |         | 13576   |
| Denmark        | 1979       | The Danish Conscript Database                                                         | National                    | both                                  | 18-26  |             |         | 6660    |
| Denmark        | 1980       | The Danish Conscript Database                                                         | National                    | both                                  | 18-26  |             |         | 2895    |
| Denmark        | 1981       | The Danish Conscript Database                                                         | National                    | both                                  | 18-26  |             |         | 1749    |
| Denmark        | 1982       | The Danish Conscript Database                                                         | National                    | both                                  | 18-26  |             |         | 1184    |

| Country            | Data years | Survey/study name                                                                                 | Level of representativeness | Age range as used for global analysis |       | Sample size |       |        |
|--------------------|------------|---------------------------------------------------------------------------------------------------|-----------------------------|---------------------------------------|-------|-------------|-------|--------|
|                    |            |                                                                                                   |                             | Rural, urban, or both                 | Male  | Female      | Male  | Female |
| Denmark            | 1982-1984  | MONICA, Glostrup                                                                                  | Community                   | urban                                 | 30-61 | 30-61       | 1940  | 1844   |
| Denmark            | 1982-1984  | Obesity Research Group-Copenhagen City Heart Study 2                                              | Subnational                 | both                                  | 22-63 |             | 1140  |        |
| Denmark            | 1983       | The Danish Conscript Database                                                                     | National                    | both                                  | 18-26 |             | 761   |        |
| Denmark            | 1984       | The Danish Conscript Database                                                                     | National                    | both                                  | 18-26 |             | 378   |        |
| Denmark            | 1984-1985  | The Epidemiology of Gallstones in a 70 Year-Old Danish Population                                 | Community                   | both                                  | 70    | 70          | 202   | 172    |
| Denmark            | 1985       | INTERSALT                                                                                         | Community                   | urban                                 | 20-59 | 20-59       | 99    | 100    |
| Denmark            | 1986-1987  | MONICA, Glostrup                                                                                  | Community                   | urban                                 | 29-61 | 29-61       | 746   | 753    |
| Denmark            | 1987       | Nilsson et al., J Intern Med 237:479-86, 1995                                                     | Community                   | urban                                 | 51    |             | 439   |        |
| Denmark            | 1991-1992  | MONICA, Glostrup                                                                                  | Community                   | urban                                 | 29-61 | 29-61       | 808   | 816    |
| Denmark            | 1992-1994  | Obesity Research Group-Copenhagen City Heart Study 3                                              | Subnational                 | both                                  | 32-73 |             | 922   |        |
| Denmark            | 1993-1997  | EPIC Aarhus                                                                                       | Community                   | urban                                 | 50-65 | 50-65       | 8430  | 8717   |
| Denmark            | 1993-1997  | EPIC Copenhagen                                                                                   | Community                   | urban                                 | 50-65 | 50-65       | 18729 | 21133  |
| Denmark            | 1996-1997  | Drivsholm et al., Diabet Med 18:126-32, 2001                                                      | Subnational                 | urban                                 | 60    | 60          | 325   | 370    |
| Denmark            | 2002-2003  | Odense Androgen Study                                                                             | Community                   | urban                                 | 20-29 |             | 783   |        |
| Denmark            | 2006-2008  | The Health2006 Cohort                                                                             | Community                   | urban                                 | 18-71 | 18-71       | 1553  | 1916   |
| Denmark            | 2007-2008  | The Danish Health Examination Survey 2007-2008                                                    | National                    | both                                  | 18+   | 18+         | 7349  | 10648  |
| Denmark            | 2009-2010  | The European Youth Heart Study                                                                    | Community                   | both                                  | 18-28 | 18-28       | 305   | 333    |
| Dominica           | 2007       | STEPS                                                                                             | National                    | both                                  | 18-64 | 18-64       | 417   | 526    |
| Dominican Republic | 1991       | DHS                                                                                               | National                    | both                                  | 18-49 |             | 2112  |        |
| Dominican Republic | 1993       | Aono et al., J Epidemiol 7(4):238-43, 1997                                                        | National                    | both                                  | 20-70 | 20-70       | 767   | 1149   |
| Dominican Republic | 1996       | DHS                                                                                               | National                    | both                                  | 18-49 |             | 6431  |        |
| Dominican Republic | 1996-1998  | Estudio De Los Factores De Riesgo Cardiovascular Y Sindrome Metabolico En La Republica Dominicana | National                    | both                                  | 18-85 | 18-85       | 1349  | 2613   |
| Dominican Republic | 2013       | DHS                                                                                               | National                    | both                                  | 18-59 | 18-49       | 9281  | 7906   |
| DR Congo           | 2001       | Multiple Indicator Cluster Survey Round 2                                                         | National                    | both                                  | 18-49 |             | 5399  |        |
| DR Congo           | 2005       | STEPS                                                                                             | Community                   | urban                                 | 18+   | 18+         | 677   | 1031   |
| DR Congo           | 2007       | DHS                                                                                               | National                    | both                                  | 18-49 |             | 3614  |        |
| DR Congo           | 2013-2014  | DHS                                                                                               | National                    | both                                  | 18-49 |             | 7034  |        |
| Ecuador            | 2003-2004  | Garcia et al., Int J Cardiol 110:263-4, 2006                                                      | Community                   | urban                                 | 25-64 |             | 166   |        |
| Ecuador            | 2004       | Ecuador Encuesta Demografica y de Salud Materna e Infantil                                        | National                    | both                                  | 18-50 |             | 3533  |        |
| Ecuador            | 2004-2005  | Cardiovascular Risk factors Multiple Evaluation in Latin America                                  | Community                   | urban                                 | 25-64 | 25-64       | 813   | 814    |
| Ecuador            | 2011-2013  | Encuesta Nacional de Salud y Nutricion                                                            | National                    | both                                  | 18-59 | 18-59       | 13188 | 17273  |
| Egypt              | 1991-1993  | The Egyptian National Hypertension Study                                                          | National                    | both                                  | 25+   | 25+         | 970   | 1322   |
| Egypt              | 1992       | DHS                                                                                               | National                    | both                                  | 18-49 |             | 4818  |        |
| Egypt              | 1995       | DHS                                                                                               | National                    | both                                  | 18-49 |             | 6705  |        |
| Egypt              | 2000       | DHS                                                                                               | National                    | both                                  | 18-49 |             | 13906 |        |
| Egypt              | 2002       | National Survey of Smoking, Obesity, Blood Pressure and Blood Glucose                             | National                    | both                                  | 18+   | 18+         | 2913  | 3643   |
| Egypt              | 2003       | DHS                                                                                               | National                    | both                                  | 18-49 |             | 8134  |        |
| Egypt              | 2003-2004  | Marzouk et al., Gut 56(8):1105-10, 2007                                                           | Community                   | rural                                 | 25+   | 25+         | 322   | 456    |
| Egypt              | 2005       | DHS                                                                                               | National                    | both                                  | 18-49 |             | 17299 |        |
| Egypt              | 2005       | STEPS                                                                                             | National                    | both                                  | 18-65 | 18-65       | 4273  | 4032   |
| Egypt              | 2007-2009  | Mostafa et al., Gut 59(8):1135-40, 2010                                                           | Community                   | rural                                 | 35+   | 35+         | 642   | 843    |
| Egypt              | 2008       | DHS                                                                                               | National                    | both                                  | 18-59 | 18-49       | 6480  | 17059  |
| Egypt              | 2011       | STEPS                                                                                             | National                    | both                                  | 18-65 | 18-65       | 1659  | 2842   |
| Egypt              | 2014       | DHS                                                                                               | National                    | both                                  | 18-49 |             | 19241 |        |
| El Salvador        | 2002-2003  | Ecuesta Nacional de Salud Familiar                                                                | National                    | both                                  | 18-49 |             | 3748  |        |
| El Salvador        | 2004       | CAMDI                                                                                             | Community                   | urban                                 | 20+   | 20+         | 396   | 811    |
| El Salvador        | 2008       | Ecuesta Nacional de Salud Familiar                                                                | National                    | both                                  | 18-49 |             | 6283  |        |
| Equatorial Guinea  | 2011       | DHS                                                                                               | National                    | both                                  | 18-49 |             | 1074  |        |
| Eritrea            | 1995       | DHS                                                                                               | National                    | both                                  | 18-49 |             | 1621  |        |
| Eritrea            | 2002       | DHS                                                                                               | National                    | both                                  | 18-49 |             | 3223  |        |
| Eritrea            | 2004       | STEPS                                                                                             | National                    | both                                  | 18-64 | 18-64       | 1044  | 1025   |
| Eritrea            | 2010       | STEPS                                                                                             | National                    | both                                  | 25-74 | 25-74       | 1712  | 4283   |
| Estonia            | 1984-1986  | Abina et al., Blood Press 12:111-21, 2003                                                         | Community                   | urban                                 | 20-54 | 30-54       | 2477  | 851    |
| Estonia            | 1992-1994  | Abina et al., Blood Press 12:111-21, 2003                                                         | Community                   | urban                                 | 20-54 | 20-54       | 921   | 678    |
| Estonia            | 1997       | Pomerleau et al., Public Health Nutrition 3: 3-10, 2000                                           | National                    | both                                  | 19-64 | 19-64       | 525   | 629    |
| Estonia            | 1999-2001  | Abina et al., Blood Press 12:111-21, 2003                                                         | Community                   | urban                                 | 20-54 | 20-54       | 635   | 692    |
| Estonia            | 2002       | Estonian Biobank                                                                                  | National                    | both                                  | 18+   | 18+         | 89    | 217    |
| Estonia            | 2003       | The European Male Ageing Study                                                                    | Community                   | both                                  | 40+   |             | 416   |        |
| Estonia            | 2003       | Estonian Biobank                                                                                  | National                    | both                                  | 18+   | 18+         | 2695  | 5688   |
| Estonia            | 2004       | Estonian Biobank                                                                                  | National                    | both                                  | 18+   | 18+         | 527   | 947    |
| Estonia            | 2007       | Estonian Biobank                                                                                  | National                    | both                                  | 18+   | 18+         | 1000  | 2187   |

| Country  | Data years | Survey/study name                                                     | Level of representativeness | Age range as used for global analysis |       | Sample size |       |        |
|----------|------------|-----------------------------------------------------------------------|-----------------------------|---------------------------------------|-------|-------------|-------|--------|
|          |            |                                                                       |                             | Rural, urban, or both                 | Male  | Female      | Male  | Female |
| Estonia  | 2008       | The European Male Ageing Study                                        | Community                   | both                                  | 40+   |             | 305   |        |
| Estonia  | 2008       | Estonian Biobank                                                      | National                    | both                                  | 18+   | 18+         | 5147  | 10990  |
| Estonia  | 2009       | Estonian Biobank                                                      | National                    | both                                  | 18+   | 18+         | 3963  | 6493   |
| Estonia  | 2010       | Estonian Biobank                                                      | National                    | both                                  | 18+   | 18+         | 4052  | 7045   |
| Estonia  | 2011       | Estonian Biobank                                                      | National                    | both                                  | 18+   | 18+         | 111   | 176    |
| Estonia  | 2012       | Estonian Biobank                                                      | National                    | both                                  | 18+   | 18+         | 85    | 130    |
| Estonia  | 2013       | Estonian Biobank                                                      | National                    | both                                  | 18+   | 18+         | 106   | 143    |
| Ethiopia | 2000       | DHS                                                                   | National                    | both                                  |       | 18-49       |       | 11776  |
| Ethiopia | 2005       | DHS                                                                   | National                    | both                                  |       | 18-49       |       | 5248   |
| Ethiopia | 2006       | STEPS                                                                 | Community                   | urban                                 | 25-64 | 25-64       | 1643  | 2309   |
| Ethiopia | 2011       | DHS                                                                   | National                    | both                                  | 18-59 | 18-49       | 12625 | 12836  |
| Fiji     | 2002       | STEPS                                                                 | National                    | both                                  | 18-64 | 18-64       | 2498  | 3605   |
| Fiji     | 2005-2007  | Pacific Obesity Prevention in Communities - Ma'alaha Youth Project    | Subnational                 | both                                  | 18-19 | 18-19       | 288   | 329    |
| Fiji     | 2007-2008  | Pacific Obesity Prevention in Communities - Ma'alaha Youth Project    | Subnational                 | both                                  | 18-22 | 18-22       | 398   | 458    |
| Fiji     | 2009       | Fiji Eye Health Survey 2009                                           | National                    | both                                  | 40+   | 40+         | 582   | 776    |
| Fiji     | 2011       | STEPS                                                                 | National                    | both                                  | 25-64 | 25-64       | 1124  | 1416   |
| Finland  | 1980       | Young Finns Study 1980                                                | National                    | rural                                 | 18-18 | 18-18       | 121   | 149    |
| Finland  | 1980       | Young Finns Study 1980                                                | National                    | urban                                 | 18-18 | 18-18       | 131   | 130    |
| Finland  | 1982       | MONICA, North Karelia/Kuopio/Turku/Loimaa                             | Subnational                 | both                                  | 25-64 | 25-64       | 4550  | 4659   |
| Finland  | 1983       | Young Finns Study 1983                                                | National                    | rural                                 | 18-21 | 18-21       | 166   | 198    |
| Finland  | 1983       | Young Finns Study 1983                                                | National                    | urban                                 | 18-21 | 18-21       | 184   | 204    |
| Finland  | 1984       | Finnish cohort of the FINE study                                      | Community                   | rural                                 | 65-84 |             | 673   |        |
| Finland  | 1984-1989  | Kuopio Ischaemic Heart Disease Risk factor Study                      | Subnational                 | both                                  | 42-61 |             | 2670  |        |
| Finland  | 1985       | INTERSALT, Turku                                                      | Community                   | urban                                 | 20-59 | 20-59       | 100   | 100    |
| Finland  | 1985-1986  | INTERSALT, Joensuu                                                    | Community                   | urban                                 | 20-59 | 20-59       | 100   | 100    |
| Finland  | 1986       | Young Finns Study 1986                                                | National                    | rural                                 | 18-24 | 18-24       | 205   | 236    |
| Finland  | 1986       | Young Finns Study 1986                                                | National                    | urban                                 | 18-24 | 18-24       | 262   | 331    |
| Finland  | 1987       | MONICA, North Karelia/Kuopio/Turku/Loimaa                             | Subnational                 | both                                  | 25-64 | 25-64       | 2896  | 3151   |
| Finland  | 1989       | Finnish cohort of the FINE study                                      | Community                   | rural                                 | 70-89 |             | 446   |        |
| Finland  | 1991-1993  | Kuopio Ischaemic Heart Disease Risk factor Study                      | Subnational                 | both                                  | 46-64 |             | 1037  |        |
| Finland  | 1992       | The National FINRISK Study                                            | Subnational                 | both                                  | 25-64 | 25-64       | 2849  | 3201   |
| Finland  | 1994       | Finnish cohort of the FINE study                                      | Community                   | rural                                 | 75-94 |             | 266   |        |
| Finland  | 1997       | The National FINRISK Study                                            | National                    | both                                  | 25-75 | 25-74       | 4128  | 4131   |
| Finland  | 1998-2001  | Kuopio Ischaemic Heart Disease Risk factor Study                      | Subnational                 | both                                  | 53-73 | 53-73       | 854   | 920    |
| Finland  | 2000       | Finnish cohort of the FINE study                                      | Community                   | rural                                 | 81-96 |             | 92    |        |
| Finland  | 2000-2001  | Health Survey                                                         | National                    | both                                  | 30+   | 30+         | 3247  | 3928   |
| Finland  | 2001       | Young Finns Study 2001                                                | National                    | rural                                 | 24-39 | 24-39       | 346   | 393    |
| Finland  | 2001       | Young Finns Study 2001                                                | National                    | urban                                 | 24-39 | 24-39       | 658   | 769    |
| Finland  | 2002       | The National FINRISK Study                                            | National                    | both                                  | 25-74 | 25-74       | 3299  | 3826   |
| Finland  | 2004-2005  | FIN-D2D                                                               | Subnational                 | both                                  | 45-74 | 45-74       | 1364  | 1461   |
| Finland  | 2005       | Mantyselka et al., Rheumatology (Oxford) 47(8):1235-38, 2008          | Community                   | rural                                 | 30-65 | 30-65       | 230   | 241    |
| Finland  | 2005-2008  | Kuopio Ischaemic Heart Disease Risk factor Study                      | Subnational                 | both                                  | 62-82 | 60-82       | 1241  | 634    |
| Finland  | 2007       | The National FINRISK Study                                            | National                    | both                                  | 25-74 | 25-74       | 2934  | 3323   |
| Finland  | 2007       | Young Finns Study 2007                                                | National                    | rural                                 | 30-45 | 30-45       | 374   | 431    |
| Finland  | 2007       | Young Finns Study 2007                                                | National                    | urban                                 | 30-45 | 30-45       | 602   | 714    |
| Finland  | 2011       | Young Finns Study 2011                                                | National                    | rural                                 | 34-49 | 34-49       | 364   | 424    |
| Finland  | 2011       | Young Finns Study 2011                                                | National                    | urban                                 | 34-49 | 34-49       | 506   | 636    |
| Finland  | 2011-2012  | Health Survey                                                         | National                    | both                                  | 30+   | 30+         | 2587  | 3180   |
| Finland  | 2012       | The National FINRISK Study                                            | National                    | both                                  | 25-74 | 25-74       | 2774  | 3052   |
| France   | 1985-1987  | MONICA, Strasbourg                                                    | Subnational                 | both                                  | 35-64 | 35-64       | 664   | 713    |
| France   | 1985-1987  | MONICA, Strasbourg                                                    | Community                   | both                                  | 25-34 | 25-34       | 65    | 78     |
| France   | 1985-1987  | MONICA, Toulouse                                                      | Subnational                 | both                                  | 35-64 | 35-64       | 675   | 644    |
| France   | 1986-1989  | MONICA, Lille                                                         | Community                   | urban                                 | 25-64 | 25-64       | 878   | 732    |
| France   | 1988-1991  | MONICA, Toulouse                                                      | Subnational                 | both                                  | 35-64 |             | 586   |        |
| France   | 1994-1996  | MONICA, Toulouse                                                      | Subnational                 | both                                  | 35-64 | 35-64       | 608   | 566    |
| France   | 1995-1997  | MONICA, Lille                                                         | Community                   | urban                                 | 36-67 | 36-67       | 598   | 590    |
| France   | 1995-1997  | MONICA, Strasbourg                                                    | Subnational                 | both                                  | 35-64 | 35-64       | 526   | 523    |
| France   | 1996-2003  | Jaquet et al., Diabetologia 48(5):849-55, 2005                        | Community                   | urban                                 | 18-34 | 18-34       | 173   | 164    |
| France   | 1999-2001  | The Three city Study                                                  | Community                   | urban                                 | 65+   | 65+         | 2423  | 3778   |
| France   | 2004-2006  | National Monitoring of Arterial Risk in Lille (MONA LISA Lille)       | Community                   | urban                                 | 35-75 | 35-75       | 783   | 795    |
| France   | 2005-2007  | National Monitoring of Arterial Risk in Bas-Rhin (MONA LISA Bas-Rhin) | Community                   | both                                  | 35-74 | 35-74       | 780   | 787    |

| Country          | Data years | Survey/study name                                                                                                                                 | Level of representativeness | Age range as used for global analysis |       | Sample size |       |        |
|------------------|------------|---------------------------------------------------------------------------------------------------------------------------------------------------|-----------------------------|---------------------------------------|-------|-------------|-------|--------|
|                  |            |                                                                                                                                                   |                             | Rural, urban, or both                 | Male  | Female      | Male  | Female |
| France           | 2006-2007  | Etude Nationale Nutrition Santé                                                                                                                   | National                    | both                                  | 18-74 | 18-74       | 876   | 1512   |
| France           | 2006-2008  | The Three city Study                                                                                                                              | Community                   | urban                                 | 72+   | 72+         | 768   | 1217   |
| France           | 2011-2013  | Enquête Littorale Souffle Air Biologie Environnement (ELISABET) Dunkerque                                                                         | Community                   | urban                                 | 40-64 | 40-64       | 761   | 812    |
| France           | 2011-2013  | Enquête Littorale Souffle Air Biologie Environnement (ELISABET) Lille                                                                             | Community                   | urban                                 | 40-64 | 40-64       | 758   | 857    |
| French Polynesia | 2010       | STEPS                                                                                                                                             | National                    | both                                  | 18-64 | 18-64       | 1458  | 1916   |
| Gabon            | 2000       | DHS                                                                                                                                               | National                    | both                                  |       | 18-49       |       | 2314   |
| Gabon            | 2009       | STEPS                                                                                                                                             | Community                   | urban                                 | 18-64 | 18-64       | 1009  | 1443   |
| Gabon            | 2012       | DHS                                                                                                                                               | National                    | both                                  |       | 18-49       |       | 4365   |
| Gambia           | 1996-1997  | National Survey of Blindness and Low Vision                                                                                                       | National                    | both                                  | 18+   | 18+         | 1733  | 2071   |
| Gambia           | 2003       | Siervo et al., Eur J Clin Nutr 60(4):455-63, 2006                                                                                                 | Community                   | urban                                 | 18-50 | 18-50       | 50    | 50     |
| Gambia           | 2010       | STEPS                                                                                                                                             | National                    | both                                  | 25-64 | 25-64       | 1610  | 1917   |
| Gambia           | 2013       | DHS                                                                                                                                               | National                    | both                                  |       | 18-49       |       | 3605   |
| Georgia          | 2010       | STEPS                                                                                                                                             | National                    | both                                  | 18-64 | 18-64       | 1842  | 4460   |
| Germany          | 1982       | MONICA, Erfurt                                                                                                                                    | Community                   | urban                                 | 25-64 | 25-64       | 106   | 103    |
| Germany          | 1982-1984  | MONICA, Chemnitz                                                                                                                                  | Community                   | urban                                 | 25-64 | 25-64       | 267   | 295    |
| Germany          | 1982-1984  | MONICA, Zwickau                                                                                                                                   | Community                   | urban                                 | 25-64 | 25-64       | 246   | 276    |
| Germany          | 1982-1985  | MONICA, Rest of Karl-Marx-Stadt County                                                                                                            | Subnational                 | urban                                 | 25-64 | 25-64       | 592   | 657    |
| Germany          | 1982-1985  | MONICA, Rest of DDR-MONICA                                                                                                                        | Subnational                 | urban                                 | 25-64 | 25-64       | 235   | 232    |
| Germany          | 1983-1984  | MONICA, Halle County                                                                                                                              | Subnational                 | urban                                 | 25-64 | 25-64       | 1110  | 1172   |
| Germany          | 1983-1987  | MONICA, Rhein-Neckar Region                                                                                                                       | Community                   | urban                                 | 35-64 | 35-64       | 1489  | 1609   |
| Germany          | 1984       | German Cardiovascular Prevention Study (GCP) - National Health Survey 1984                                                                        | Subnational                 | both                                  | 25-69 | 25-69       | 2415  | 2366   |
| Germany          | 1984       | MONICA, Bremen North/West                                                                                                                         | Community                   | urban                                 | 25-64 | 25-64       | 813   | 852    |
| Germany          | 1984-1985  | MONICA, Berlin-Lichtenberg                                                                                                                        | Community                   | urban                                 | 25-64 | 25-64       | 593   | 635    |
| Germany          | 1984-1985  | MONICA, Augsburg                                                                                                                                  | Community                   | both                                  | 25-64 | 25-64       | 2005  | 1961   |
| Germany          | 1984-1986  | MONICA, Cottbus County                                                                                                                            | Community                   | urban                                 | 25-64 | 25-64       | 657   | 739    |
| Germany          | 1985-1986  | INTERSALT, Cottbus                                                                                                                                | Community                   | urban                                 | 20-59 | 20-59       | 99    | 99     |
| Germany          | 1985-1986  | INTERSALT, Heidelberg                                                                                                                             | Community                   | urban                                 | 20-59 | 20-59       | 97    | 99     |
| Germany          | 1985-1986  | CINDI                                                                                                                                             | Subnational                 | both                                  | 25-64 | 25-64       | 1875  | 1990   |
| Germany          | 1985-1986  | INTERSALT, Bernried                                                                                                                               | Community                   | urban                                 | 20-59 | 20-59       | 99    | 98     |
| Germany          | 1987-1988  | MONICA, Erfurt                                                                                                                                    | Community                   | urban                                 | 25-64 | 25-64       | 871   | 909    |
| Germany          | 1988       | German Cardiovascular Prevention Study (GCP) - National Health Survey 1988                                                                        | Subnational                 | both                                  | 25-69 | 25-69       | 2642  | 2678   |
| Germany          | 1988       | MONICA, Berlin-Lichtenberg                                                                                                                        | Community                   | urban                                 | 25-64 | 25-64       | 690   | 728    |
| Germany          | 1988       | MONICA, Bremen North/West                                                                                                                         | Community                   | urban                                 | 25-69 | 25-69       | 619   | 632    |
| Germany          | 1988       | MONICA, Bremen Center/South/East                                                                                                                  | Community                   | urban                                 | 25-69 | 25-69       | 499   | 582    |
| Germany          | 1988       | MONICA, Chemnitz                                                                                                                                  | Community                   | urban                                 | 25-64 | 25-64       | 288   | 382    |
| Germany          | 1988       | MONICA, Zwickau                                                                                                                                   | Community                   | urban                                 | 25-64 | 25-64       | 193   | 250    |
| Germany          | 1988-1989  | CINDI                                                                                                                                             | Subnational                 | both                                  | 25-64 | 25-64       | 1361  | 1435   |
| Germany          | 1988-1989  | MONICA, Halle County                                                                                                                              | Subnational                 | urban                                 | 25-64 | 25-64       | 959   | 1201   |
| Germany          | 1988-1989  | MONICA, Rest of Karl-Marx-Stadt County                                                                                                            | Subnational                 | urban                                 | 25-64 | 25-64       | 541   | 626    |
| Germany          | 1989-1990  | MONICA, Cottbus County                                                                                                                            | Community                   | urban                                 | 25-64 | 25-64       | 539   | 529    |
| Germany          | 1989-1990  | MONICA, Augsburg                                                                                                                                  | Community                   | both                                  | 25-64 | 25-64       | 1933  | 1944   |
| Germany          | 1990-1992  | European Community Respiratory Health Survey, Hamburg                                                                                             | Community                   | urban                                 | 20-47 | 20-47       | 146   | 138    |
| Germany          | 1990-1992  | European Community Respiratory Health Survey, Erfurt                                                                                              | Community                   | urban                                 | 20-47 | 20-47       | 146   | 124    |
| Germany          | 1991-1992  | MONICA, Bremen North/West                                                                                                                         | Community                   | urban                                 | 25-69 | 25-69       | 599   | 671    |
| Germany          | 1991-1992  | MONICA, Bremen Center/South/East                                                                                                                  | Community                   | urban                                 | 25-69 | 25-69       | 524   | 546    |
| Germany          | 1991-1992  | CINDI                                                                                                                                             | Subnational                 | both                                  | 25-64 | 25-64       | 1326  | 1400   |
| Germany          | 1991-1992  | German Cardiovascular Prevention Study (GCP) - National Health Survey 1991                                                                        | Subnational                 | both                                  | 25-69 | 25-69       | 2599  | 2670   |
| Germany          | 1991-1992  | First National Examination of life conditions, Environment and Health in East Germany 1991/92                                                     | Subnational                 | both                                  | 25-69 | 25-69       | 1042  | 1155   |
| Germany          | 1991-1992  | MONICA, Erfurt                                                                                                                                    | Community                   | urban                                 | 25-64 | 25-64       | 587   | 572    |
| Germany          | 1993-1994  | MONICA, Chemnitz                                                                                                                                  | Community                   | urban                                 | 25-64 | 25-64       | 408   | 424    |
| Germany          | 1993-1994  | MONICA, Zwickau                                                                                                                                   | Community                   | urban                                 | 25-64 | 25-64       | 139   | 186    |
| Germany          | 1994-1995  | MONICA, Augsburg                                                                                                                                  | Community                   | both                                  | 25-64 | 25-64       | 1898  | 1968   |
| Germany          | 1994-1998  | EPIC Heidelberg                                                                                                                                   | Community                   | urban                                 | 40-64 | 35-64       | 11680 | 13458  |
| Germany          | 1994-1998  | EPIC Potsdam                                                                                                                                      | Community                   | urban                                 | 40-64 | 35-64       | 10224 | 15995  |
| Germany          | 1997-1999  | German National Health Interview and Examination Survey                                                                                           | National                    | both                                  | 18-79 | 18-79       | 3435  | 3608   |
| Germany          | 1997-2001  | Study of Health in Pomerania (SHIP-0) baseline study                                                                                              | Subnational                 | both                                  | 20-80 | 20-80       | 2111  | 2187   |
| Germany          | 1999-2001  | KORA S4 Study: Kooperative Research in the Region of Augsburg Survey 4                                                                            | Subnational                 | both                                  | 24-75 | 24-75       | 2076  | 2148   |
| Germany          | 2000-2001  | European Community Respiratory Health Survey, Hamburg                                                                                             | Community                   | urban                                 | 30-57 | 30-57       | 146   | 138    |
| Germany          | 2000-2001  | European Community Respiratory Health Survey, Erfurt                                                                                              | Community                   | urban                                 | 30-57 | 30-57       | 146   | 124    |
| Germany          | 2000-2002  | Epidemiological study of the chances of prevention, early recognition and optimal treatment of chronic diseases in an elderly population (ESTHER) | Subnational                 | both                                  | 50-75 | 50-75       | 4420  | 5361   |
| Germany          | 2000-2003  | Heinz Nixdorf RECALL Study                                                                                                                        | Community                   | urban                                 | 45-74 | 45-74       | 2375  | 2393   |

| Country       | Data years | Survey/study name                                                                                                                                 | Level of representativeness | Age range as used for global analysis |       | Sample size |       |        |
|---------------|------------|---------------------------------------------------------------------------------------------------------------------------------------------------|-----------------------------|---------------------------------------|-------|-------------|-------|--------|
|               |            |                                                                                                                                                   |                             | Rural, urban, or both                 | Male  | Female      | Male  | Female |
| Germany       | 2002       | Echinococcus Multilocularis and Internal Diseases in Leutkirch                                                                                    | Community                   | urban                                 | 18-65 | 18-65       | 840   | 950    |
| Germany       | 2002-2006  | Study of Health in Pomerania (SHIP-1) 5-year follow-up                                                                                            | Subnational                 | both                                  | 25-85 | 25-85       | 1583  | 1707   |
| Germany       | 2006-2008  | KORA F4 Study: Kooperative Research in the Region of Augsburg Follow-Up of Survey 4                                                               | Subnational                 | both                                  | 31-81 | 31-81       | 1480  | 1583   |
| Germany       | 2008-2011  | Epidemiological study of the chances of prevention, early recognition and optimal treatment of chronic diseases in an elderly population (ESTHER) | Subnational                 | both                                  | 58-84 | 58-84       | 1468  | 1622   |
| Germany       | 2008-2011  | German Health Interview and Examination Survey for adults 2008-11 (DEGS1)                                                                         | National                    | both                                  | 18-79 | 18-79       | 3389  | 3650   |
| Ghana         | 1993       | DHS                                                                                                                                               | National                    | both                                  |       | 18-49       |       | 1754   |
| Ghana         | 1998       | DHS                                                                                                                                               | National                    | both                                  |       | 18-49       |       | 2053   |
| Ghana         | 2001       | Addo et al., Ethn Dis 16(4):894-99, 2006                                                                                                          | Community                   | rural                                 | 18+   | 18+         | 89    | 206    |
| Ghana         | 2001-2002  | Cappuccio et al., Hypertension 43(5):1017-22, 2004                                                                                                | Community                   | both                                  | 35-84 | 35-84       | 194   | 338    |
| Ghana         | 2002       | Amoah et al., Ethn Dis 13(2 Suppl 2):S97-101, 2003                                                                                                | Community                   | both                                  | 25+   | 25+         | 1859  | 2947   |
| Ghana         | 2003       | Women's Health Study of Accra                                                                                                                     | Community                   | urban                                 |       | 18+         |       | 1328   |
| Ghana         | 2003       | DHS                                                                                                                                               | National                    | both                                  |       | 18-49       |       | 4311   |
| Ghana         | 2006       | STEPS                                                                                                                                             | Community                   | urban                                 | 25+   | 25+         | 841   | 1634   |
| Ghana         | 2007-2008  | SAGE                                                                                                                                              | National                    | both                                  | 50+   | 50+         | 2192  | 1987   |
| Ghana         | 2008       | DHS                                                                                                                                               | National                    | both                                  |       | 18-49       |       | 3884   |
| Ghana         |            | Amoah, Public Health Nutr 6(8):751-7,2003                                                                                                         | Community                   | both                                  | 25+   | 25+         | 1857  | 2875   |
| Greece        | 1991       | Seven Countries Study                                                                                                                             | Subnational                 | both                                  | 70-89 |             |       | 177    |
| Greece        | 1991-1999  | EPIC                                                                                                                                              | National                    | both                                  | 19-86 | 19-86       | 11578 | 16477  |
| Greece        | 2000-2001  | Karalis et al., BMC Public Health7:351, 2007                                                                                                      | Community                   | rural                                 | 18+   | 18+         | 73    | 87     |
| Greece        | 2003       | National Epidemiological Survey                                                                                                                   | National                    | both                                  | 18-19 | 18-19       | 987   | 1150   |
| Greece        | 2010-2012  | ADONUT                                                                                                                                            | National                    | both                                  | 18-19 | 18-19       | 1531  | 1641   |
| Greenland     | 2005-2010  | Population Health Survey in Greenland                                                                                                             | National                    | both                                  | 18+   | 18+         | 1336  | 1714   |
| Grenada       | 2011       | STEPS                                                                                                                                             | National                    | both                                  | 25-64 | 25-64       | 438   | 636    |
| Guatemala     | 1995       | DHS                                                                                                                                               | National                    | both                                  |       | 18-49       |       | 4864   |
| Guatemala     | 1998-1999  | DHS                                                                                                                                               | National                    | both                                  |       | 18-49       |       | 2322   |
| Guatemala     | 2001-2002  | CAMDI                                                                                                                                             | Community                   | urban                                 | 20+   | 20+         | 293   | 638    |
| Guatemala     | 2002       | Guatemala Reproductive Health Survey                                                                                                              | National                    | both                                  | 18-60 | 18-50       | 1775  | 6049   |
| Guatemala     | 2003-2005  | The Institute of Nutrition of Central America and Panama Nutrition Supplementation Trial Cohort                                                   | Community                   | both                                  | 25-41 | 25-41       | 268   | 288    |
| Guatemala     | 2008-2009  | Encuesta Nacional de Salud Materno Infantil                                                                                                       | National                    | both                                  |       | 18-49       |       | 13669  |
| Guinea        | 1999       | DHS                                                                                                                                               | National                    | both                                  |       | 18-49       |       | 3233   |
| Guinea        | 2005       | DHS                                                                                                                                               | National                    | both                                  |       | 18-49       |       | 3091   |
| Guinea        | 2009       | STEPS                                                                                                                                             | Subnational                 | both                                  | 18-64 | 18-64       | 1044  | 1119   |
| Guinea        | 2012       | DHS                                                                                                                                               | National                    | both                                  |       | 18-49       |       | 3624   |
| Guinea Bissau | 2010       | Multiple Indicator Cluster Survey                                                                                                                 | National                    | both                                  |       | 18-49       |       | 6654   |
| Guyana        | 2009       | DHS                                                                                                                                               | National                    | both                                  | 18-49 | 18-49       | 2954  | 4009   |
| Haiti         | 1994-1995  | DHS                                                                                                                                               | National                    | both                                  |       | 18-49       |       | 1868   |
| Haiti         | 2000       | DHS                                                                                                                                               | National                    | both                                  |       | 18-49       |       | 7781   |
| Haiti         | 2005-2006  | DHS                                                                                                                                               | National                    | both                                  |       | 18-49       |       | 4192   |
| Haiti         | 2012       | DHS                                                                                                                                               | National                    | both                                  |       | 18-49       |       | 7565   |
| Honduras      | 1996       | Honduras National Micronutrient Survey                                                                                                            | National                    | both                                  |       | 20-40       |       | 722    |
| Honduras      | 2003-2004  | CAMDI                                                                                                                                             | Community                   | urban                                 | 20+   | 20+         | 428   | 764    |
| Honduras      | 2005-2006  | DHS                                                                                                                                               | National                    | both                                  |       | 18-49       |       | 15463  |
| Honduras      | 2011-2012  | DHS                                                                                                                                               | National                    | both                                  |       | 18-49       |       | 18078  |
| Hungary       | 1982-1983  | MONICA, Pecs                                                                                                                                      | Community                   | urban                                 | 35-64 | 35-64       | 823   | 861    |
| Hungary       | 1982-1984  | MONICA, Budapest                                                                                                                                  | Community                   | urban                                 | 35-64 | 35-64       | 774   | 737    |
| Hungary       | 1985       | INTERSALT                                                                                                                                         | Community                   | rural                                 | 20-59 | 20-59       | 100   | 100    |
| Hungary       | 1985-1988  | First Hungarian Representative Nutrition Survey                                                                                                   | National                    | both                                  | 18+   | 18+         | 3079  | 8916   |
| Hungary       | 1987-1988  | MONICA, Budapest                                                                                                                                  | Community                   | urban                                 | 35-64 | 35-64       | 1413  | 1594   |
| Hungary       | 1987-1988  | MONICA, Pecs                                                                                                                                      | Community                   | urban                                 | 35-64 | 35-64       | 1573  | 1510   |
| Hungary       | 1992-1994  | Nutrition survey of the Hungarian population in a Randomized Trial between 1992-1994                                                              | National                    | both                                  | 18-35 | 18-35       | 388   | 1281   |
| Hungary       | 2003       | The European Male Ageing Study                                                                                                                    | Community                   | both                                  | 40+   |             |       | 428    |
| Hungary       | 2008       | The European Male Ageing Study                                                                                                                    | Community                   | both                                  | 40+   |             |       | 349    |
| Iceland       | 1983       | MONICA, Arnes County                                                                                                                              | Community                   | rural                                 | 25-64 | 25-64       | 388   | 450    |
| Iceland       | 1983       | MONICA, Reykjavik                                                                                                                                 | Subnational                 | urban                                 | 25-64 | 25-64       | 434   | 461    |
| Iceland       | 1985-1986  | INTERSALT                                                                                                                                         | Community                   | urban                                 | 20-59 | 20-59       | 100   | 100    |
| Iceland       | 1988-1989  | MONICA, Arnes County                                                                                                                              | Community                   | rural                                 | 25-64 | 25-64       | 385   | 435    |
| Iceland       | 1988-1989  | MONICA, Reykjavik                                                                                                                                 | Subnational                 | urban                                 | 25-64 | 25-64       | 414   | 443    |
| Iceland       | 1993-1994  | MONICA, Arnes County                                                                                                                              | Community                   | rural                                 | 25-64 | 25-64       | 422   | 484    |
| Iceland       | 1993-1994  | MONICA, Reykjavik                                                                                                                                 | Subnational                 | urban                                 | 25-64 | 25-64       | 441   | 448    |
| India         | 1975-1979  | Diet and Nutritional status of Rural population and Prevalence of Hypertension                                                                    | National                    | rural                                 | 18+   | 18+         | 22574 | 17782  |
| India         | 1986       | INTERSALT                                                                                                                                         | Community                   | urban                                 | 20-59 | 20-59       | 100   | 99     |



| Country   | Data years | Survey/study name                                                                                                                     | Level of representativeness | Age range as used for global analysis |       | Sample size |        |        |
|-----------|------------|---------------------------------------------------------------------------------------------------------------------------------------|-----------------------------|---------------------------------------|-------|-------------|--------|--------|
|           |            |                                                                                                                                       |                             | Rural, urban, or both                 | Male  | Female      | Male   | Female |
| India     | 1988-1989  | Rmchandran et al., Diabetes Res Clin Pract 58(1):55-60, 2002                                                                          | Community                   | urban                                 | 20-74 | 20-74       | 455    | 437    |
| India     | 1988-1990  | NNMB survey                                                                                                                           | Subnational                 | rural                                 | 20+   | 20+         | 9447   | 11914  |
| India     | 1991-1994  | Prabhakaran et al., Chronic Illn 3(1):8-19, 2007                                                                                      | Community                   | rural                                 | 35-64 | 35-64       | 542    | 630    |
| India     | 1991-1994  | Prabhakaran et al., Chronic Illn 3(1):8-19, 2007                                                                                      | Community                   | urban                                 | 35-64 | 35-64       | 1388   | 1455   |
| India     | 1991-1995  | Reddy et al., Obes Rev 3(3):197-202, 2002                                                                                             | Community                   | rural                                 | 35-64 | 35-64       | 1070   | 1332   |
| India     | 1991-1995  | Reddy et al., Obes Rev 3(3):197-202, 2002                                                                                             | Community                   | urban                                 | 35-64 | 35-64       | 1456   | 1594   |
| India     | 1991-1997  | Mumbai Cohort Study                                                                                                                   | Community                   | urban                                 | 35+   | 35+         | 88658  | 59515  |
| India     | 1992-1994  | JHW-Rural                                                                                                                             | Community                   | rural                                 | 20-59 | 20-59       | 1700   | 1063   |
| India     | 1993-1994  | Khongsdier, Eur J Clin Nutr 56(6):484-89, 2002                                                                                        | Community                   | both                                  | 18-59 |             | 575    |        |
| India     | 1993-1995  | JHW-1                                                                                                                                 | Community                   | urban                                 | 20-59 | 20-59       | 1294   | 655    |
| India     | 1995       | Shobana et al., Diabetes Res Clin Pract 42(3):181-86, 1998                                                                            | Community                   | urban                                 | 20-74 | 20-74       | 1061   | 1093   |
| India     | 1995-1996  | Kusuma et al., Ann Hum Biol 29(5):502-12, 2002                                                                                        | Community                   | both                                  | 18-84 | 18-84       | 747    | 737    |
| India     | 1995-1996  | Epidemiology of blood pressure across cross-cultural populations of Visakhapatnam district, Andhra Pradesh, India                     | Community                   | rural                                 | 19-76 | 19-76       | 209    | 228    |
| India     | 1995-1997  | Aravind Comprehensive Eye Survey                                                                                                      | Community                   | rural                                 | 40-90 | 40-90       | 2308   | 2830   |
| India     | 1995-1997  | Kashmiri Adults                                                                                                                       | Subnational                 | both                                  | 40+   | 40+         | 2496   | 2587   |
| India     | 1996-1997  | Diet and Nutritional status of Rural population and Prevalence of Hypertension                                                        | National                    | rural                                 | 18+   | 18+         | 12735  | 17890  |
| India     | 1996-1999  | Chennai Urban Population Study                                                                                                        | Community                   | urban                                 | 20+   | 20+         | 557    | 705    |
| India     | 1997       | Ramachandran et al., Diabetes Res Clin Pract 44(3):207-13, 1999                                                                       | Community                   | rural                                 | 20-74 | 20-74       | 738    | 879    |
| India     | 1998-1999  | DHS                                                                                                                                   | National                    | both                                  | 18-49 |             |        | 75599  |
| India     | 1998-2001  | Chennai Prospective Study                                                                                                             | Community                   | urban                                 | 35+   | 35+         | 264848 | 235968 |
| India     | 1999-2001  | JHW-2                                                                                                                                 | Community                   | urban                                 | 20-59 | 20-59       | 468    | 486    |
| India     | 1999-2002  | New Delhi Birth Cohort                                                                                                                | Community                   | urban                                 | 26-33 | 26-33       | 886    | 638    |
| India     | 2000       | Ramachandran et al., Diabet Med,20(3):220-24, 2003                                                                                    | Subnational                 | urban                                 | 20-75 | 20-75       | 4640   | 5257   |
| India     | 2001       | Diet and Nutritional status of Rural population and Prevalence of Hypertension                                                        | National                    | rural                                 | 18+   | 18+         | 11074  | 17317  |
| India     | 2001-2004  | Chennai Urban Rural Epidemiology Study                                                                                                | Community                   | urban                                 | 20+   | 20+         | 1094   | 1254   |
| India     | 2002-2003  | JHW-3                                                                                                                                 | Community                   | urban                                 | 20-59 | 20-59       | 179    | 195    |
| India     | 2002-2003  | Blood Pressure epidemiology in tribal, rural and urban communities of Orissa with special reference to physical and social parameters | Community                   | rural                                 | 18-80 | 18-80       | 200    | 186    |
| India     | 2003-2005  | WHO-ICMR NCD risk factor surveillance study                                                                                           | National                    | rural                                 | 18-69 | 18-69       | 6266   | 6478   |
| India     | 2003-2005  | WHO-ICMR NCD risk factor surveillance study                                                                                           | National                    | urban                                 | 18-69 | 18-69       | 7164   | 7296   |
| India     | 2004-2005  | JHW-4                                                                                                                                 | Community                   | urban                                 | 20-59 | 20-59       | 413    | 473    |
| India     | 2005-2006  | DHS                                                                                                                                   | National                    | both                                  | 18-54 | 18-49       | 64045  | 102354 |
| India     | 2005-2006  | Diet and Nutritional status of Rural population and Prevalence of Hypertension                                                        | National                    | rural                                 | 18+   | 18+         | 14036  | 18598  |
| India     | 2005-2007  | Prevalence of cardiovascular risk factors in rural Tamil Nadu                                                                         | Community                   | rural                                 | 25-65 | 25-65       | 4927   | 5573   |
| India     | 2006       | Ramachandran et al., Diabetes Care 31(5):893-98, 2008                                                                                 | Community                   | both                                  | 20+   | 20+         | 3321   | 3745   |
| India     | 2006-2007  | Kusuma et al., Asia Pac J Public Health 21(4):497-507, 2009                                                                           | Community                   | urban                                 | 18-74 | 18-74       | 182    | 192    |
| India     | 2006-2008  | Central India Eye and Medical Study                                                                                                   | Community                   | rural                                 | 30+   | 30+         | 2190   | 2520   |
| India     | 2006-2008  | Kashmiri Young Adults                                                                                                                 | Subnational                 | both                                  | 20-40 | 20-40       | 2119   | 905    |
| India     | 2006-2009  | New Delhi Birth Cohort                                                                                                                | Community                   | urban                                 | 33-38 | 33-38       | 650    | 445    |
| India     | 2007-2008  | Integrated Disease Surveillance Project Non-communicable Disease Risk Factors Survey                                                  | Subnational                 | both                                  | 18-64 | 18-64       | 2494   | 3196   |
| India     | 2007-2008  | Integrated Disease Surveillance Project Non-communicable Disease Risk Factors Survey                                                  | Subnational                 | both                                  | 18-64 | 18-64       | 1525   | 2931   |
| India     | 2007-2008  | Integrated Disease Surveillance Project Non-communicable Disease Risk Factors Survey                                                  | Subnational                 | both                                  | 18-64 | 18-64       | 2489   | 2641   |
| India     | 2007-2008  | Integrated Disease Surveillance Project Non-communicable Disease Risk Factors Survey                                                  | Subnational                 | both                                  | 18-64 | 18-64       | 2767   | 2701   |
| India     | 2007-2008  | Integrated Disease Surveillance Project Non-communicable Disease Risk Factors Survey                                                  | Subnational                 | both                                  | 18-64 | 18-64       | 2023   | 1884   |
| India     | 2007-2008  | Integrated Disease Surveillance Project Non-communicable Disease Risk Factors Survey                                                  | Subnational                 | both                                  | 18-64 | 18-64       | 1895   | 2773   |
| India     | 2007-2008  | Integrated Disease Surveillance Project Non-communicable Disease Risk Factors Survey                                                  | Subnational                 | both                                  | 18-64 | 18-64       | 1821   | 2827   |
| India     | 2007-2008  | SAGE                                                                                                                                  | National                    | both                                  | 50+   | 50+         | 3214   | 3149   |
| India     | 2007-2009  | Prevalence of NCD risk factor in people above 15 year in Rural area Nagpur using WHO STEP approach                                    | Community                   | rural                                 | 18+   | 18+         | 1828   | 1681   |
| India     | 2008-2010  | ICMR India Diabetes Study                                                                                                             | National                    | both                                  | 20+   | 20+         | 6959   | 6847   |
| India     | 2009-2010  | Baseline Survey for the assessment of prevalence of risk factors of NCDs in Gandhinagar District                                      | Community                   | rural                                 | 18-64 | 18-64       | 679    | 654    |
| India     | 2009-2010  | Baseline Survey for the assessment of prevalence of risk factors of NCDs in Gandhinagar District                                      | Community                   | urban                                 | 18-64 | 18-64       | 696    | 723    |
| India     | 2011-2012  | Diet and Nutritional status of Rural population and Prevalence of Hypertension                                                        | National                    | rural                                 | 18+   | 18+         | 24079  | 32208  |
| Indonesia | 1983-1987  | Strickland et al., Eur J Clin Nutr 48 Suppl 3: 598-108; discussion 5-9, 1994                                                          | Community                   | both                                  | 18+   | 18+         | 447    | 564    |
| Indonesia | 1993-1994  | Indonesian Family Life Surveys                                                                                                        | National                    | both                                  | 18+   | 18+         | 5739   | 7059   |
| Indonesia | 1997-1998  | Indonesian Family Life Surveys                                                                                                        | National                    | both                                  | 18+   | 18+         | 7712   | 9482   |
| Indonesia | 2000-2001  | Indonesian Family Life Surveys                                                                                                        | National                    | both                                  | 18+   | 18+         | 10549  | 11431  |
| Indonesia | 2001       | Ng et al., Bull World Health Organ 84(4):305-13, 2006                                                                                 | Community                   | both                                  | 18-74 | 18-74       | 1261   | 1234   |
| Indonesia | 2001       | STEPS/SURKESNAS                                                                                                                       | National                    | both                                  | 18-64 | 18-64       | 4100   | 4775   |
| Indonesia | 2006       | Jakarta Non Communicable Disease Risk Factor Surveillance                                                                             | Community                   | urban                                 | 25-64 | 25-64       | 641    | 950    |
| Indonesia | 2007-2008  | Indonesian Family Life Surveys                                                                                                        | National                    | both                                  | 18+   | 18+         | 12615  | 14101  |
| Indonesia | 2013       | Population Health Basic Health Research 2013 (Riskeudas 2013)                                                                         | National                    | both                                  | 18+   | 18+         | 314793 | 342182 |
| Iran      | 1990-1991  | National Health Survey I                                                                                                              | National                    | both                                  | 18-18 | 18-18       | 284    | 405    |

| Country | Data years | Survey/study name                                                                                | Level of representativeness | Age range as used for global analysis |       | Sample size |       |        |
|---------|------------|--------------------------------------------------------------------------------------------------|-----------------------------|---------------------------------------|-------|-------------|-------|--------|
|         |            |                                                                                                  |                             | Rural, urban, or both                 | Male  | Female      | Male  | Female |
| Iran    | 1997-1998  | Khadivzadeh, East Mediterr Health J 8(4-5):612-18, 2002                                          | Community                   | urban                                 | 18-49 |             | 1513  | 377    |
| Iran    | 1999-2000  | National Health Survey II                                                                        | National                    | both                                  | 18-99 | 18-99       | 13702 | 16618  |
| Iran    | 1999-2001  | Tehran Lipid and Glucose Study                                                                   | Community                   | urban                                 | 18+   | 18+         | 4555  | 6125   |
| Iran    | 2000       | ASADABADI Study                                                                                  | Community                   | urban                                 | 18+   | 18+         | 132   | 168    |
| Iran    | 2001       | Isfahan Healthy Heart Program, Arak rural                                                        | Community                   | rural                                 | 19+   | 19+         | 1023  | 1080   |
| Iran    | 2001       | Isfahan Healthy Heart Program, Arak urban                                                        | Community                   | urban                                 | 19+   | 19+         | 2084  | 2124   |
| Iran    | 2001       | Isfahan Healthy Heart Program, Isfahan rural                                                     | Community                   | rural                                 | 19+   | 19+         | 232   | 233    |
| Iran    | 2001       | Isfahan Healthy Heart Program, Isfahan urban                                                     | Community                   | urban                                 | 19+   | 19+         | 1760  | 1912   |
| Iran    | 2001       | Isfahan Healthy Heart Program, Najaf Abad rural                                                  | Community                   | rural                                 | 19+   | 19+         | 405   | 416    |
| Iran    | 2001       | Isfahan Healthy Heart Program, Najaf Abad urban                                                  | Community                   | urban                                 | 19+   | 19+         | 573   | 571    |
| Iran    | 2002-2005  | Tehran Lipid and Glucose Study                                                                   | Community                   | urban                                 | 18+   | 18+         | 2153  | 2766   |
| Iran    | 2003-2004  | The Persian Gulf Healthy Heart Study                                                             | Subnational                 | urban                                 | 25-64 | 25-64       | 1615  | 1528   |
| Iran    | 2003-2004  | Childhood and Adolescence Surveillance and Prevention of Adult Noncommunicable Disease R1        | National                    | both                                  | 18-18 | 18-18       | 370   | 362    |
| Iran    | 2004       | Hajian-Tilaki et al., Obes Rev 8(1):3-10, 2007                                                   | Community                   | urban                                 | 20-70 | 20-70       | 1800  | 1800   |
| Iran    | 2004-2008  | Golestan Cohort Study                                                                            | Subnational                 | both                                  | 40-75 | 40-75       | 21229 | 28808  |
| Iran    | 2005       | Provincial Non-Communicable Disease Surveillance Survey 2005                                     | National                    | both                                  | 18-64 | 18-64       | 37998 | 37520  |
| Iran    | 2005-2006  | Rashidy-Pour, Obes Rev (1):2-6, 2009                                                             | Subnational                 | both                                  | 30-70 | 30-70       | 1695  | 2104   |
| Iran    | 2005-2008  | Tehran Lipid and Glucose Study                                                                   | Community                   | urban                                 | 18+   | 18+         | 2531  | 3259   |
| Iran    | 2006       | Provincial Non-Communicable Disease Surveillance Survey 2006                                     | National                    | both                                  | 18-65 | 18-65       | 14130 | 14008  |
| Iran    | 2007       | Isfahan Healthy Heart Program, Arak rural                                                        | Community                   | rural                                 | 19+   | 19+         | 1028  | 1024   |
| Iran    | 2007       | Isfahan Healthy Heart Program, Arak urban                                                        | Community                   | urban                                 | 19+   | 19+         | 1424  | 1359   |
| Iran    | 2007       | Isfahan Healthy Heart Program, Isfahan rural                                                     | Community                   | rural                                 | 19+   | 19+         | 155   | 151    |
| Iran    | 2007       | Isfahan Healthy Heart Program, Isfahan urban                                                     | Community                   | urban                                 | 19+   | 19+         | 1309  | 1302   |
| Iran    | 2007       | Isfahan Healthy Heart Program, Najaf Abad rural                                                  | Community                   | rural                                 | 19+   | 19+         | 254   | 253    |
| Iran    | 2007       | Isfahan Healthy Heart Program, Najaf Abad urban                                                  | Community                   | urban                                 | 19+   | 19+         | 494   | 542    |
| Iran    | 2007       | Provincial Non-Communicable Disease Surveillance Survey 2007                                     | National                    | both                                  | 18-64 | 18-64       | 2211  | 2209   |
| Iran    | 2007       | Provincial Non-Communicable Disease Surveillance Survey 2007                                     | National                    | both                                  | 18-64 | 18-64       | 13840 | 13805  |
| Iran    | 2008       | Provincial Non-Communicable Disease Surveillance Survey 2008                                     | National                    | both                                  | 18-64 | 18-64       | 13692 | 13601  |
| Iran    | 2008-2011  | Tehran Lipid and Glucose Study                                                                   | Community                   | urban                                 | 20+   | 20+         | 4622  | 5884   |
| Iran    | 2009       | Provincial Non-Communicable Disease Surveillance Survey 2009                                     | National                    | both                                  | 18-64 | 18-64       | 13919 | 13717  |
| Iran    | 2009-2010  | Childhood and Adolescence Surveillance and Prevention of Adult Noncommunicable Disease R3        | National                    | both                                  | 18-18 | 18-18       | 497   | 532    |
| Iran    | 2011       | Provincial Non-Communicable Disease Surveillance Survey 2011                                     | National                    | both                                  | 18-69 | 18-69       | 4075  | 5738   |
| Iran    | 2011-2012  | Childhood and Adolescence Surveillance and Prevention of Adult Noncommunicable Disease R4        | National                    | both                                  | 18-18 | 18-18       | 287   | 269    |
| Iraq    | 2006       | STEPS                                                                                            | National                    | both                                  | 25-64 | 25-64       | 2251  | 2252   |
| Ireland | 1997-1999  | North/South Ireland Food Consumption Survey                                                      | National                    | both                                  | 18-64 | 18-64       | 613   | 698    |
| Ireland | 1998       | Survey of Lifestye, Attitudes and Nutritional in Ireland 1998                                    | National                    | both                                  | 18+   | 18+         | 123   | 296    |
| Ireland | 2002       | Survey of Lifestye, Attitudes and Nutritional in Ireland 2002                                    | National                    | both                                  | 18+   | 18+         | 164   | 215    |
| Ireland | 2006-2007  | Survey of Lifestye, Attitudes and Nutritional in Ireland 2006-2007                               | National                    | both                                  | 40+   | 18+         | 524   | 675    |
| Ireland | 2008-2010  | National Adult Nutrition Survey                                                                  | National                    | both                                  | 18+   | 18+         | 658   | 696    |
| Ireland | 2009-2011  | The Irish Longitudinal Study on Ageing                                                           | National                    | both                                  | 50+   | 50+         | 2693  | 3170   |
| Israel  | 1985-1986  | MONICA, Tel Aviv                                                                                 | Community                   | urban                                 | 35-64 | 35-64       | 653   | 685    |
| Israel  | 1990-1991  | The Jerusalem Longitudinal Cohort Study                                                          | Community                   | urban                                 | 69-70 | 69-70       | 244   | 199    |
| Israel  | 1997-1998  | The Jerusalem Longitudinal Cohort Study                                                          | Community                   | urban                                 | 76-77 | 76-77       | 418   | 425    |
| Israel  | 1999-2001  | Mabat First Israeli National Health and Nutrition Survey                                         | National                    | both                                  | 25-64 | 25-64       | 1371  | 1410   |
| Israel  | 1999-2005  | The Israel Glucose Intolerance, Obesity and Hypertention Study                                   | National                    | urban                                 | 58-94 | 58-94       | 514   | 527    |
| Israel  | 2002-2007  | Hadera District Study                                                                            | Subnational                 | urban                                 | 25-78 | 25-78       | 548   | 538    |
| Israel  | 2003-2004  | Mabat Youth First Israeli National Health and Nutrition Survey in 7th-12th grade students 2003-4 | National                    | both                                  | 18-18 | 18-18       | 50    | 34     |
| Israel  | 2005-2006  | The Jerusalem Longitudinal Cohort Study                                                          | Community                   | urban                                 | 83-85 | 83-85       | 490   | 583    |
| Israel  | 2005-2006  | Mabat Zahav National Health and Nutrition Survey ages 65 and over 2005-6                         | National                    | both                                  | 65+   | 65+         | 743   | 819    |
| Italy   | 1980-1982  | Po river delta Epidemiological Study - first survey                                              | Community                   | rural                                 | 18-64 | 18-64       | 1212  | 1333   |
| Italy   | 1982-1987  | MONICA, Latina                                                                                   | Community                   | rural                                 | 24-66 | 24-66       | 852   | 868    |
| Italy   | 1983-1996  | Malattie cardiovascolari ATerosclerotiche Istituto Superiore di Sanità                           | Community                   | rural                                 | 18-77 | 18-77       | 3948  | 4488   |
| Italy   | 1985       | Finland, Italy, Netherlands, Elderly (Fine-Italy)                                                | Community                   | rural                                 | 65-84 |             | 650   |        |
| Italy   | 1985       | INTERSALT, Naples                                                                                | Community                   | urban                                 | 20-59 | 20-59       | 100   | 100    |
| Italy   | 1985-1988  | Pisa Epidemiological Study - first survey                                                        | Community                   | urban                                 | 18-90 | 18-90       | 1502  | 1755   |
| Italy   | 1986       | INTERSALT, Bassiano                                                                              | Community                   | urban                                 | 20-59 | 20-59       | 99    | 100    |
| Italy   | 1986       | INTERSALT, Gubbio                                                                                | Community                   | urban                                 | 20-59 | 20-59       | 99    | 100    |
| Italy   | 1986       | INTERSALT, Mirano                                                                                | Community                   | urban                                 | 20-59 | 20-59       | 100   | 100    |
| Italy   | 1986       | MONICA, Friuli                                                                                   | Subnational                 | urban                                 | 25-64 | 25-64       | 921   | 918    |
| Italy   | 1986-1987  | MONICA, Brianza                                                                                  | Subnational                 | urban                                 | 25-64 | 25-64       | 814   | 832    |
| Italy   | 1988-1991  | Po river delta Epidemiological Study - second survey                                             | Community                   | rural                                 | 18-73 | 18-73       | 1142  | 1307   |

| Country | Data years | Survey/study name                                                                   | Level of representativeness | Age range as used for global analysis |        | Sample size |       |        |
|---------|------------|-------------------------------------------------------------------------------------|-----------------------------|---------------------------------------|--------|-------------|-------|--------|
|         |            |                                                                                     |                             | Rural, urban, or both                 | Male   | Female      | Male  | Female |
| Italy   | 1989       | MONICA, Friuli                                                                      | Subnational                 | urban                                 | 25-64  | 25-64       | 902   | 900    |
| Italy   | 1989       | Ventimiglia Heart Study                                                             | Community                   | rural                                 | 18+    | 18+         | 486   | 594    |
| Italy   | 1989-1990  | MONICA, Brianza                                                                     | Subnational                 | urban                                 | 25-64  | 25-64       | 787   | 786    |
| Italy   | 1990       | Bruneck Study                                                                       | Community                   | rural                                 | 40-79  | 40-79       | 469   | 450    |
| Italy   | 1991-1993  | Pisa Epidemiological Study - second survey                                          | Community                   | urban                                 | 18-97  | 18-97       | 1164  | 1440   |
| Italy   | 1992-1993  | Italian Longitudinal Study on Aging                                                 | National                    | both                                  | 65-84  | 65-84       | 1666  | 1455   |
| Italy   | 1992-1998  | Vobarno Study                                                                       | Community                   | both                                  | 25-64  | 35-64       | 265   | 309    |
| Italy   | 1993-1994  | MONICA, Brianza                                                                     | Subnational                 | urban                                 | 25-64  | 25-64       | 801   | 856    |
| Italy   | 1993-1998  | EPIC Florence                                                                       | Community                   | urban                                 | 24-72  | 24-72       | 3498  | 9968   |
| Italy   | 1994       | MONICA, Friuli                                                                      | Subnational                 | urban                                 | 25-64  | 25-64       | 882   | 888    |
| Italy   | 1995       | Bruneck Study                                                                       | Community                   | rural                                 | 45-84  | 45-84       | 411   | 408    |
| Italy   | 1995-1996  | Italian Longitudinal Study on Aging                                                 | National                    | both                                  | 69-90  | 69-90       | 970   | 779    |
| Italy   | 1995-1999  | PROgetto Veneto Anziani                                                             | Subnational                 | both                                  | 65+    | 65+         | 1187  | 1722   |
| Italy   | 1997-1999  | Lucca CUORE Study                                                                   | Community                   | urban                                 | 18-84  | 18-84       | 897   | 1123   |
| Italy   | 1998-1999  | progetto VIP                                                                        | Community                   | both                                  | 25-74  | 25-74       | 599   | 600    |
| Italy   | 1998-2000  | InCHIANTI study                                                                     | Community                   | both                                  | 18+    | 18+         | 560   | 681    |
| Italy   | 1998-2002  | Osservatorio Epidemiologico Cardiovascolare/Health Examination Survey               | National                    | both                                  | 35-74  | 35-74       | 4870  | 4752   |
| Italy   | 2000       | Bruneck Study                                                                       | Community                   | rural                                 | 50-89  | 50-89       | 331   | 361    |
| Italy   | 2000-2001  | Italian Longitudinal Study on Aging                                                 | National                    | both                                  | 73-93  | 73-93       | 557   | 473    |
| Italy   | 2000-2003  | PROgetto Veneto Anziani                                                             | Subnational                 | both                                  | 67+    | 67+         | 795   | 1331   |
| Italy   | 2001-2003  | The Study of Asti                                                                   | Community                   | both                                  | 45-64  | 45-64       | 780   | 878    |
| Italy   | 2002-2005  | PROgetto Veneto Anziani                                                             | Subnational                 | both                                  | 68+    | 68+         | 621   | 1138   |
| Italy   | 2003       | The European Male Ageing Study                                                      | Community                   | both                                  | 40+    |             |       | 433    |
| Italy   | 2004-2005  | Italian Project on the Epidemiology of Alzheimer's disease                          | National                    | both                                  | 65-84  | 65-84       | 1569  | 1421   |
| Italy   | 2004-2005  | Vobarno study                                                                       | Community                   | both                                  | 55-74  | 55-74       | 99    | 113    |
| Italy   | 2004-2008  | Cardiolab project                                                                   | National                    | urban                                 | 40+    | 40+         | 19152 | 14782  |
| Italy   | 2005       | Bruneck Study                                                                       | Community                   | rural                                 | 55-93  | 55-93       | 264   | 307    |
| Italy   | 2005-2010  | Moli-sani Study                                                                     | Subnational                 | both                                  | 35+    | 35+         | 11694 | 12614  |
| Italy   | 2008       | The European Male Ageing Study                                                      | Community                   | both                                  | 40+    |             |       | 346    |
| Italy   | 2008-2009  | progetto VIP                                                                        | Community                   | both                                  | 25-74  | 25-74       | 596   | 596    |
| Italy   | 2008-2012  | Osservatorio Epidemiologico Cardiovascolare/Health Examination Survey               | National                    | both                                  | 35-80  | 35-80       | 4368  | 4332   |
| Italy   | 2010       | Bruneck Study                                                                       | Community                   | rural                                 | 60-98  | 60-98       | 225   | 259    |
| Italy   | 2010-2012  | Cardiovascular risk MEtabolic syndrome Liver and Autoimmunity diseases (CA.ME.LI.A) | Community                   | both                                  | 18-75  | 18-75       | 477   | 514    |
| Italy   | 2011-2012  | Vobarno study                                                                       | Community                   | both                                  | 49-62  | 49-62       | 107   | 143    |
| Jamaica | 1993       | Zohoori et al., West Indian Med J 52(2):111-17, 2003                                | Community                   | urban                                 | 25-74  | 25-74       | 845   | 1245   |
| Jamaica | 1994-1995  | Cooper et al., Am J Public Health 87(2):160-68, 1997                                | Community                   | urban                                 | 25-100 | 25-100      | 597   | 833    |
| Jamaica | 1998       | Ragoobirsingh et al., Diabetes Obes Metab 6(1):23-27, 2004                          | National                    | both                                  | 18+    | 18+         | 552   | 945    |
| Jamaica | 2000-2001  | Jamaica Health and Lifestyle Survey                                                 | National                    | both                                  | 18-74  | 18-74       | 608   | 1231   |
| Jamaica | 2006-2007  | Jamaica Youth Risk and Resiliency Behaviour Survey 2006                             | National                    | both                                  | 18-19  | 18-19       | 150   | 188    |
| Jamaica | 2007-2008  | Jamaica Health and Lifestyle Survey                                                 | National                    | both                                  | 18-74  | 18-74       | 821   | 1822   |
| Japan   | 1975       | National Nutrition Survey                                                           | National                    | both                                  | 18-99  | 18-99       | 4611  | 6628   |
| Japan   | 1976       | National Nutrition Survey                                                           | National                    | both                                  | 18-99  | 18-99       | 5521  | 7789   |
| Japan   | 1977       | National Nutrition Survey                                                           | National                    | both                                  | 18-99  | 18-99       | 4434  | 6240   |
| Japan   | 1978       | National Nutrition Survey                                                           | National                    | both                                  | 18-99  | 18-99       | 4782  | 6613   |
| Japan   | 1979       | National Nutrition Survey                                                           | National                    | both                                  | 18-99  | 18-99       | 5068  | 6923   |
| Japan   | 1980       | National Nutrition Survey                                                           | National                    | both                                  | 18-99  | 18-99       | 5806  | 7337   |
| Japan   | 1980-1983  | Aito Town Study                                                                     | Community                   | rural                                 | 20-77  | 20-77       | 741   | 970    |
| Japan   | 1981       | National Nutrition Survey                                                           | National                    | both                                  | 18-99  | 18-99       | 4126  | 6034   |
| Japan   | 1982       | National Nutrition Survey                                                           | National                    | both                                  | 18-99  | 18-99       | 4755  | 6709   |
| Japan   | 1983       | National Nutrition Survey                                                           | National                    | both                                  | 18-99  | 18-99       | 4579  | 6548   |
| Japan   | 1984       | National Nutrition Survey                                                           | National                    | both                                  | 18-99  | 18-99       | 4537  | 6286   |
| Japan   | 1985       | INTERSALT, Osaka                                                                    | Community                   | urban                                 | 20-59  | 20-59       | 100   | 97     |
| Japan   | 1985       | INTERSALT, Tochigi                                                                  | Community                   | urban                                 | 20-59  | 20-59       | 95    | 99     |
| Japan   | 1985       | INTERSALT, Toyama                                                                   | Community                   | urban                                 | 20-59  | 20-59       | 100   | 100    |
| Japan   | 1985       | National Nutrition Survey                                                           | National                    | both                                  | 18-99  | 18-99       | 5383  | 6869   |
| Japan   | 1985-1986  | Akabane Study                                                                       | Community                   | urban                                 | 40-69  | 40-69       | 812   | 1022   |
| Japan   | 1986       | National Nutrition Survey                                                           | National                    | both                                  | 18-99  | 18-99       | 5275  | 6741   |
| Japan   | 1987       | Konan Town Study                                                                    | Community                   | rural                                 | 20-79  | 20-79       | 70    | 88     |
| Japan   | 1987       | National Nutrition Survey                                                           | National                    | both                                  | 18-99  | 18-99       | 4719  | 6485   |
| Japan   | 1988       | Konan Town Study                                                                    | Community                   | rural                                 | 20-79  | 20-79       | 76    | 85     |
| Japan   | 1988       | National Nutrition Survey                                                           | National                    | both                                  | 18-99  | 18-99       | 5126  | 6397   |

| Country | Data years | Survey/study name                                                                      | Level of representativeness | Age range as used for global analysis |       | Sample size |         |         |
|---------|------------|----------------------------------------------------------------------------------------|-----------------------------|---------------------------------------|-------|-------------|---------|---------|
|         |            |                                                                                        |                             | Rural, urban, or both                 | Male  | Female      | Male    | Female  |
| Japan   | 1989       | Aito Town Study                                                                        | Community                   | rural                                 | 18-74 | 18-84       | 529     | 525     |
| Japan   | 1989       | Konan Town Study                                                                       | Community                   | rural                                 | 20-79 | 20-79       | 58      | 63      |
| Japan   | 1989       | National Nutrition Survey                                                              | National                    | both                                  | 18-99 | 18-99       | 4325    | 5571    |
| Japan   | 1990       | Konan Town Study                                                                       | Community                   | rural                                 | 20-79 | 20-79       | 27      | 51      |
| Japan   | 1990       | National Nutrition Survey                                                              | National                    | both                                  | 18-99 | 18-99       | 4583    | 5928    |
| Japan   | 1991       | Konan Town Study                                                                       | Community                   | rural                                 | 20-79 | 20-79       | 93      | 116     |
| Japan   | 1991       | Shigaraki Town Study                                                                   | Community                   | rural                                 | 30-89 | 30-89       | 230     | 319     |
| Japan   | 1991       | National Nutrition Survey                                                              | National                    | both                                  | 18-99 | 18-99       | 4667    | 5860    |
| Japan   | 1992       | Konan Town Study                                                                       | Community                   | rural                                 | 20-79 | 20-79       | 45      | 47      |
| Japan   | 1992       | Shigaraki Town Study                                                                   | Community                   | rural                                 | 30-89 | 30-89       | 288     | 385     |
| Japan   | 1992       | National Nutrition Survey                                                              | National                    | both                                  | 18-99 | 18-99       | 4348    | 5458    |
| Japan   | 1993       | Konan Town Study                                                                       | Community                   | rural                                 | 20-79 | 20-79       | 54      | 65      |
| Japan   | 1993       | Shigaraki Town Study                                                                   | Community                   | rural                                 | 30-89 | 30-89       | 301     | 452     |
| Japan   | 1993       | National Nutrition Survey                                                              | National                    | both                                  | 18-99 | 18-99       | 4414    | 5519    |
| Japan   | 1994       | Konan Town Study                                                                       | Community                   | rural                                 | 20-79 | 20-79       | 43      | 59      |
| Japan   | 1994       | Shigaraki Town Study                                                                   | Community                   | rural                                 | 30-89 | 30-89       | 251     | 336     |
| Japan   | 1994       | National Nutrition Survey                                                              | National                    | both                                  | 18-99 | 18-99       | 4303    | 5318    |
| Japan   | 1995       | Konan Town Study                                                                       | Community                   | rural                                 | 20-79 | 20-79       | 45      | 61      |
| Japan   | 1995       | Shigaraki Town Study                                                                   | Community                   | rural                                 | 30-89 | 30-89       | 300     | 470     |
| Japan   | 1995       | National Nutrition Survey                                                              | National                    | both                                  | 18-99 | 18-99       | 4326    | 5286    |
| Japan   | 1996       | Shigaraki Town Study                                                                   | Community                   | rural                                 | 30-89 | 30-89       | 86      | 152     |
| Japan   | 1996       | National Nutrition Survey                                                              | National                    | both                                  | 18-99 | 18-99       | 4303    | 5230    |
| Japan   | 1996-1997  | International collaborative study of macronutrients, micronutrients and blood pressure | Community                   | both                                  | 40-59 | 40-59       | 130     | 129     |
| Japan   | 1997       | Shigaraki Town Study                                                                   | Community                   | rural                                 | 30-89 | 30-89       | 61      | 100     |
| Japan   | 1997       | National Nutrition Survey                                                              | National                    | both                                  | 18-99 | 18-99       | 4173    | 5161    |
| Japan   | 1997-1998  | International collaborative study of macronutrients, micronutrients and blood pressure | Community                   | urban                                 | 40-59 | 40-59       | 149     | 148     |
| Japan   | 1997-1998  | International collaborative study of macronutrients, micronutrients and blood pressure | Community                   | urban                                 | 40-59 | 40-59       | 149     | 150     |
| Japan   | 1997-1998  | International collaborative study of macronutrients, micronutrients and blood pressure | Community                   | urban                                 | 40-59 | 40-59       | 146     | 144     |
| Japan   | 1997-2000  | Sudo et al., J Orthop Sci 13(5):413-18, 2008                                           | Community                   | rural                                 | 55+   | 45+         | 261     | 785     |
| Japan   | 1998       | Niigata Study                                                                          | Community                   | both                                  | 70    | 70          | 287     | 284     |
| Japan   | 1998       | National Nutrition Survey                                                              | National                    | both                                  | 18-99 | 18-99       | 4407    | 5327    |
| Japan   | 1999       | Niigata Study                                                                          | Community                   | both                                  | 71    | 71          | 245     | 216     |
| Japan   | 1999       | National Nutrition Survey                                                              | National                    | both                                  | 18-99 | 18-99       | 3610    | 4635    |
| Japan   | 2000       | Niigata Study                                                                          | Community                   | both                                  | 72    | 72          | 233     | 202     |
| Japan   | 2000       | National Nutrition Survey                                                              | National                    | both                                  | 18-99 | 18-99       | 3863    | 4612    |
| Japan   | 2001       | The Japan Association of Health Service Database                                       | Subnational                 | both                                  | 20+   | 20+         | 1471868 | 1231378 |
| Japan   | 2001       | Niigata Study                                                                          | Community                   | both                                  | 73    | 73          | 235     | 201     |
| Japan   | 2001       | National Nutrition Survey                                                              | National                    | both                                  | 18-99 | 18-99       | 3708    | 4675    |
| Japan   | 2002       | Niigata Study                                                                          | Community                   | both                                  | 74    | 74          | 228     | 202     |
| Japan   | 2002       | National Nutrition Survey                                                              | National                    | both                                  | 18-99 | 18-99       | 3472    | 4279    |
| Japan   | 2002-2003  | The Hisayama Study                                                                     | Community                   | both                                  | 40+   | 40+         | 1414    | 1884    |
| Japan   | 2003       | National Health and Nutrition Survey                                                   | National                    | both                                  | 18-99 | 18-99       | 3432    | 4307    |
| Japan   | 2003       | Niigata Study                                                                          | Community                   | both                                  | 75    | 75          | 215     | 189     |
| Japan   | 2004       | National Health and Nutrition Survey                                                   | National                    | both                                  | 18-99 | 18-99       | 2816    | 3468    |
| Japan   | 2004       | Niigata Study                                                                          | Community                   | both                                  | 76    | 76          | 215     | 185     |
| Japan   | 2005       | National Health and Nutrition Survey                                                   | National                    | both                                  | 18-99 | 18-99       | 2698    | 3315    |
| Japan   | 2005       | Niigata Study                                                                          | Community                   | both                                  | 77    | 77          | 203     | 184     |
| Japan   | 2006       | National Health and Nutrition Survey                                                   | National                    | both                                  | 18-99 | 18-99       | 2964    | 3641    |
| Japan   | 2006       | Niigata Study                                                                          | Community                   | both                                  | 78    | 78          | 199     | 194     |
| Japan   | 2007       | National Health and Nutrition Survey                                                   | National                    | both                                  | 18-99 | 18-99       | 2990    | 3607    |
| Japan   | 2007       | Niigata Study                                                                          | Community                   | both                                  | 79    | 79          | 183     | 192     |
| Japan   | 2008       | National Health and Nutrition Survey                                                   | Community                   | urban                                 | 40+   | 40+         | 6562    | 11944   |
| Japan   | 2008       | National Health and Nutrition Survey                                                   | National                    | both                                  | 18-99 | 18-99       | 3059    | 3740    |
| Japan   | 2008       | Niigata Study                                                                          | Community                   | both                                  | 80    | 80          | 174     | 180     |
| Japan   | 2009       | National Health and Nutrition Survey                                                   | National                    | both                                  | 18-99 | 18-99       | 2979    | 3685    |
| Japan   | 2010       | National Health and Nutrition Survey                                                   | National                    | both                                  | 18-99 | 18-99       | 2770    | 3410    |
| Japan   | 2011       | National Health and Nutrition Survey                                                   | National                    | both                                  | 18-99 | 18-99       | 2620    | 3178    |
| Japan   | 2011       | The Tokyo Health Service Association Database                                          | Community                   | urban                                 | 20+   | 20+         | 82453   | 54028   |
| Japan   | 2012       | National Health and Nutrition Survey                                                   | National                    | both                                  | 18-99 | 18-99       | 9817    | 12182   |
| Japan   |            | Japanese Population-Based Osteoporosis Study                                           | Subnational                 | both                                  |       | 18-79       |         | 3222    |
| Jordan  | 1994-1996  | Ajlouni, Int J Obes Relat Metab Disord 22(7), 1998                                     | Subnational                 | both                                  | 25+   | 25+         | 1047    | 1787    |

| Country          | Data years | Survey/study name                                                                     | Level of representativeness | Age range as used for global analysis |       | Sample size |           |
|------------------|------------|---------------------------------------------------------------------------------------|-----------------------------|---------------------------------------|-------|-------------|-----------|
|                  |            |                                                                                       |                             | Rural, urban, or both                 | Male  | Female      | Male      |
| Jordan           | 1997       | DHS                                                                                   | National                    | both                                  | 18-49 |             | 3067      |
| Jordan           | 2002       | DHS                                                                                   | National                    | both                                  | 18-49 |             | 4910      |
| Jordan           | 2004       | Khader et al., Metab Syndr Relat Disord 6(2):113-20, 2008                             | Community                   | both                                  | 25+   | 25-59       | 394 548   |
| Jordan           | 2004       | Behavioural Risk Factor Surveillance Survey                                           | National                    | both                                  | 18+   | 18+         | 236 473   |
| Jordan           | 2007       | Behavioural Risk Factor Surveillance Survey                                           | National                    | both                                  | 18+   | 18+         | 332 433   |
| Jordan           | 2007       | DHS                                                                                   | National                    | both                                  | 18-49 |             | 4504      |
| Jordan           | 2009       | DHS                                                                                   | National                    | both                                  | 18-49 |             | 4112      |
| Jordan           | 2009       | Metabolic abnormalities and vitamin D study                                           | National                    | both                                  | 18+   | 18+         | 1144 3350 |
| Jordan           | 2012       | DHS                                                                                   | National                    | both                                  | 18-49 |             | 6434      |
| Kazakhstan       | 1995       | DHS                                                                                   | National                    | both                                  | 18-49 |             | 3138      |
| Kazakhstan       | 1999       | DHS                                                                                   | National                    | both                                  | 18-49 |             | 2005      |
| Kazakhstan       |            | Balakhmetova et al., Ter Arkh 63(1):17-20, 1991                                       | Community                   | urban                                 | 20-54 |             | 2886      |
| Kenya            | 1985       | INTERSALT                                                                             | Community                   | rural                                 | 20-59 | 20-59       | 90 86     |
| Kenya            | 1993       | DHS                                                                                   | National                    | both                                  | 18-49 |             | 3308      |
| Kenya            | 1998       | DHS                                                                                   | National                    | both                                  | 18-49 |             | 3233      |
| Kenya            | 2003       | DHS                                                                                   | National                    | both                                  | 18-49 |             | 6227      |
| Kenya            | 2008-2009  | DHS                                                                                   | National                    | both                                  | 18-49 |             | 6796      |
| Kiribati         | 1981       | Epidemiological survey of Kiribati                                                    | Subnational                 | rural                                 | 20+   | 20+         | 473 531   |
| Kiribati         | 1981       | Epidemiological survey of Kiribati                                                    | Subnational                 | urban                                 | 20+   | 20+         | 939 906   |
| Kiribati         | 2004       | STEPS                                                                                 | National                    | both                                  | 18-64 | 18-64       | 729 895   |
| Kuwait           | 1980-1981  | al-Isa, Ann Nutr Metab 41(5):307-14, 1997                                             | Community                   | both                                  | 18+   |             | 959       |
| Kuwait           | 1993-1994  | al-Isa, Ann Nutr Metab 41(5):307-14, 1997                                             | Community                   | both                                  | 18+   |             | 1730      |
| Kuwait           | 1995-1996  | Abdella et al., Diabetes Res Clin Pract 42(3):187-96, 1998                            | Subnational                 | both                                  | 20-84 | 20-84       | 1099 1892 |
| Kuwait           | 1995-1996  | Abdella et al., Diabetes Res and Clin Pract 42(3):187-196, 1998                       | Subnational                 | both                                  | 20-84 | 20-84       | 1099 1892 |
| Kuwait           | 1998       | Abiaka et al., Biol Trace Elem Res 91(1):33-43, 2003                                  | National                    | both                                  | 18-80 | 18-80       | 178 233   |
| Kuwait           | 2006       | STEPS                                                                                 | National                    | both                                  | 20-65 | 20-65       | 918 1298  |
| Kuwait           | 2008-2009  | National Nutrition Program for the State of Kuwait                                    | National                    | both                                  | 18+   | 18+         | 484 568   |
| Kuwait           | 2008-2010  | World Health Survey                                                                   | National                    | both                                  | 18+   | 18+         | 1842 1619 |
| Kyrgyzstan       | 1993       | Kyrgyzstan Multipurpose Poverty Surveys                                               | National                    | both                                  | 18-60 | 18-60       | 2457 2457 |
| Kyrgyzstan       | 1997       | DHS                                                                                   | National                    | both                                  | 18-49 |             | 3120      |
| Kyrgyzstan       | 2012       | DHS                                                                                   | National                    | both                                  | 18-49 |             | 6489      |
| Kyrgyzstan       | 2013       | STEPS                                                                                 | National                    | both                                  | 25-64 | 25-64       | 942 1600  |
| Lao PDR          | 2006       | Multiple Indicator Cluster Survey 3                                                   | National                    | both                                  | 18-49 |             | 698       |
| Lao PDR          | 2008       | STEPS                                                                                 | Community                   | urban                                 | 25-64 | 25-64       | 1568 2352 |
| Lao PDR          | 2013       | STEPS                                                                                 | National                    | both                                  | 18-64 | 18-64       | 984 1461  |
| Latvia           | 1997       | Pomerleau et al., Public Health Nutrition 3: 3-10, 2000                               | National                    | both                                  | 19-50 | 19-50       | 703 732   |
| Latvia           | 2008-2009  | Erġlis et al., Medicina (Kaunas) 48(6):310-16, 2012                                   | National                    | both                                  | 25-74 | 25-74       | 1376 2431 |
| Lebanon          | 1997       | Population and Housing Survey                                                         | National                    | both                                  | 18+   | 18+         | 501 715   |
| Lebanon          | 2008-2009  | STEPS                                                                                 | National                    | both                                  | 18+   | 18+         | 1261 1365 |
| Lesotho          | 1993       | National survey on iodine, vitamin A and iron status of women and children in Lesotho | National                    | both                                  | 20-65 |             | 792       |
| Lesotho          | 2004-2005  | DHS                                                                                   | National                    | both                                  | 18-49 |             | 2703      |
| Lesotho          | 2009-2010  | DHS                                                                                   | National                    | both                                  | 18-59 | 18-49       | 2704 3200 |
| Lesotho          | 2012       | STEPS                                                                                 | National                    | both                                  | 25-64 | 25-64       | 726 1442  |
| Liberia          | 2006-2007  | DHS                                                                                   | National                    | both                                  | 18-49 |             | 5675      |
| Liberia          | 2011       | STEPS                                                                                 | National                    | both                                  | 25-64 | 25-64       | 998 1253  |
| Liberia          | 2013       | DHS                                                                                   | National                    | both                                  | 18-49 | 18-49       | 3675 4143 |
| Libya            | 1998-1999  | Kadiki et al., Diabetes Metab 27(6):647-54, 2001                                      | Community                   | both                                  | 18+   | 18+         | 228 398   |
| Libya            | 2009       | STEPS                                                                                 | National                    | both                                  | 25-64 | 25-64       | 1678 1563 |
| Lithuania        | 1977-1980  | Multifactorial Prevention of Ishaemic Heart Disease, Kaunas                           | Community                   | urban                                 | 45-59 |             | 5691      |
| Lithuania        | 1983-1985  | MONICA, Kaunas                                                                        | Community                   | urban                                 | 35-64 | 35-64       | 728 735   |
| Lithuania        | 1986-1987  | MONICA, Kaunas                                                                        | Community                   | urban                                 | 35-64 | 35-64       | 894 868   |
| Lithuania        | 1992-1993  | MONICA, Kaunas                                                                        | Community                   | urban                                 | 35-64 | 35-64       | 610 621   |
| Lithuania        | 1997       | Pomerleau et al., Public Health Nutrition 3: 3-10, 2000                               | National                    | both                                  | 19-49 | 19-49       | 697 751   |
| Lithuania        | 2001-2002  | MONICA4                                                                               | Community                   | urban                                 | 35-69 | 35-69       | 625 776   |
| Lithuania        | 2002       |                                                                                       | National                    | both                                  | 24-70 | 24-70       | 977 927   |
| Lithuania        | 2006-2008  | Health, Alcohol and Psychosocial factors in Eastern Europe                            | Community                   | urban                                 | 45-75 | 45-75       | 3231 3874 |
| Luxembourg       | 2007-2009  | Observation of cardiovascular risk factors in Luxembourg (ORISCAV-LUX)                | National                    | both                                  | 18-69 | 18-69       | 656 695   |
| Macedonia (TFYR) | 1999       | Multiple Indicator Cluster Survey                                                     | National                    | both                                  | 18-45 |             | 1029      |
| Madagascar       | 1997       | Mauny et al., Ann Trop Med Parasitol 97(6):645-54, 2003                               | Community                   | both                                  | 18+   | 18+         | 248 283   |
| Madagascar       | 1997       | DHS                                                                                   | National                    | both                                  | 18-49 |             | 2506      |
| Madagascar       | 2003-2004  | DHS                                                                                   | National                    | both                                  | 18-49 |             | 6367      |

| Country                          | Data years | Survey/study name                                                                     | Level of representativeness | Age range as used for global analysis |       | Sample size |       |        |
|----------------------------------|------------|---------------------------------------------------------------------------------------|-----------------------------|---------------------------------------|-------|-------------|-------|--------|
|                                  |            |                                                                                       |                             | Rural, urban, or both                 | Male  | Female      | Male  | Female |
| Madagascar                       | 2005       | STEPS                                                                                 | Community                   | urban                                 | 25-64 | 25-64       | 2596  | 2490   |
| Madagascar                       | 2008-2009  | DHS                                                                                   | National                    | both                                  |       | 18-49       |       | 6723   |
| Malawi                           | 1992       | DHS                                                                                   | National                    | both                                  |       | 18-49       |       | 2267   |
| Malawi                           | 1996       | Chilima et al., Eur J Clin Nutr 52(9):643-9                                           | Community                   | rural                                 | 55-94 | 55-94       | 86    | 185    |
| Malawi                           | 2000       | DHS                                                                                   | National                    | both                                  |       | 18-49       |       | 9973   |
| Malawi                           | 2004       | DHS                                                                                   | National                    | both                                  |       | 18-49       |       | 8563   |
| Malawi                           | 2009       | STEPS                                                                                 | National                    | both                                  | 25-64 | 25-64       | 1666  | 3185   |
| Malawi                           | 2010       | DHS                                                                                   | National                    | both                                  |       | 18-49       |       | 6006   |
| Malaysia                         | 1996       | National Health and Morbidity Survey                                                  | National                    | both                                  | 30+   | 30+         | 9925  | 10943  |
| Malaysia                         | 2002-2003  | Malaysian Adult Nutrition Survey                                                      | National                    | both                                  | 18-59 | 18-59       | 3302  | 3395   |
| Malaysia                         | 2004       | Variation in the prevalence, awareness, and control of diabetes in a multiethnic      | National                    | both                                  | 18+   | 18+         | 5879  | 8056   |
| Malaysia                         | 2005       | STEPS                                                                                 | National                    | both                                  | 25-64 | 25-64       | 1286  | 1286   |
| Malaysia                         | 2006       | The third national health and morbidity survey (NHMS III)                             | National                    | both                                  | 18+   | 18+         | 15029 | 17828  |
| Malaysia                         | 2008       | Metabolic Syndrome Study in Malaysia                                                  | National                    | both                                  | 18+   | 18+         | 1522  | 2814   |
| Malaysia                         | 2009-2012  | Foo LH et al. APJCN                                                                   | Community                   | urban                                 | 18-19 | 18-19       | 21    | 30     |
| Malaysia                         | 2011       | The National Health and Morbidity Survey                                              | National                    | both                                  | 18+   | 18+         | 8029  | 8782   |
| Malaysia                         | 2012       | Global School-based Student Health Survey                                             | National                    | both                                  |       | 18-18       |       | 84     |
| Maldives                         | 2001       | Multiple Indicator Cluster Survey                                                     | National                    | both                                  |       | 18-50       |       | 1145   |
| Maldives                         | 2004       | STEPS                                                                                 | Subnational                 | urban                                 | 25-64 | 25-64       | 933   | 1086   |
| Maldives                         | 2009       | DHS                                                                                   | National                    | both                                  |       | 18-49       |       | 5213   |
| Maldives                         | 2011       | STEPS                                                                                 | National                    | both                                  | 18-64 | 18-64       | 588   | 999    |
| Maldives                         | 2014       | Global School-based Student Health Survey                                             | National                    | both                                  | 18-19 | 18-19       | 122   | 161    |
| Mali                             | 1995-1996  | DHS                                                                                   | National                    | both                                  |       | 18-49       |       | 4116   |
| Mali                             | 1997       | Torheim et al., Eur J Clin Nutr 58(4):594-604, 2004                                   | Subnational                 | rural                                 | 18-44 | 18-44       | 237   | 337    |
| Mali                             | 1999       | Torheim et al., Public Health Nutr 8(4):387-94, 2005                                  | Subnational                 | rural                                 |       | 18-44       |       | 191    |
| Mali                             | 2001       | DHS                                                                                   | National                    | both                                  |       | 18-49       |       | 9281   |
| Mali                             | 2006       | DHS                                                                                   | National                    | both                                  |       | 18-49       |       | 10726  |
| Mali                             | 2007       | STEPS                                                                                 | Community                   | both                                  | 18-64 | 18-64       | 931   | 1313   |
| Mali                             | 2012-2013  | DHS                                                                                   | National                    | both                                  |       | 18-49       |       | 4156   |
| Malta                            | 1984       | MONICA, Malta                                                                         | Community                   | urban                                 | 25-64 | 25-64       | 948   | 929    |
| Malta                            | 1986       | INTERSALT                                                                             | Community                   | rural                                 | 20-59 | 20-59       | 100   | 100    |
| Marshall Islands                 | 2002       | STEPS                                                                                 | National                    | both                                  | 18-64 | 18-64       | 686   | 1057   |
| Mauritania                       | 2000-2001  | DHS                                                                                   | National                    | both                                  |       | 18-49       |       | 2635   |
| Mauritania                       | 2006       | STEPS                                                                                 | Community                   | urban                                 | 18-64 | 18-64       | 1065  | 1218   |
| Mauritius                        | 1987       | Mauritius non communicable disease survey                                             | National                    | both                                  | 25-74 | 25-74       | 2347  | 2653   |
| Mauritius                        | 1992       | Mauritius non communicable disease survey                                             | National                    | both                                  | 25-74 | 25-74       | 2985  | 3477   |
| Mauritius                        | 1998       | Mauritius non communicable disease survey                                             | National                    | both                                  | 25-74 | 25-74       | 2566  | 3248   |
| Mauritius                        | 2009       | Mauritius non communicable diseases survey                                            | National                    | both                                  | 19+   | 19+         | 2860  | 3389   |
| Mexico                           | 1988-1989  | Encuesta Nacional de Nutrición                                                        | National                    | both                                  |       | 18-49       |       | 12043  |
| Mexico                           | 1992-1993  | Encuesta Nacional de Enfermedades Crónicas                                            | National                    | urban                                 | 20-69 | 20-69       | 6040  | 8287   |
| Mexico                           | 1996       | Sanchez-Castillo et al., Eur J Clin Nutr 55(10):833-40, 2001                          | Community                   | rural                                 | 18+   | 18+         | 104   | 149    |
| Mexico                           | 1998-1999  | Encuesta Nacional de Nutrición                                                        | National                    | both                                  |       | 18-49       |       | 13886  |
| Mexico                           | 1998-2004  | Mexico City Prospective Study                                                         | Community                   | urban                                 | 35-84 | 35-84       | 51768 | 105313 |
| Mexico                           | 1999-2000  | The Survey on Health, Well-Being, and Aging in Latin America and the Caribbean (SABE) | Community                   | urban                                 | 60+   | 60+         | 359   | 548    |
| Mexico                           | 2000       | Encuesta Nacional de Salud                                                            | National                    | both                                  | 18+   | 18+         | 14702 | 30283  |
| Mexico                           | 2001       | The Mexican Health and Aging Study                                                    | National                    | both                                  | 50+   | 50+         | 1031  | 1224   |
| Mexico                           | 2002       | Encuesta Nacional Sobre Niveles de vida de los Hogares                                | National                    | both                                  | 18+   | 18+         | 7334  | 9089   |
| Mexico                           | 2003       | The Mexican Health and Aging Study                                                    | National                    | both                                  | 50+   | 50+         | 893   | 1162   |
| Mexico                           | 2004-2005  | CArdiovascular Risk factors Multiple Evaluation in Latin America                      | Community                   | urban                                 | 25-64 | 25-64       | 833   | 894    |
| Mexico                           | 2005       | Encuesta Nacional Sobre Niveles de vida de los Hogares                                | National                    | both                                  | 18+   | 18+         | 7551  | 9084   |
| Mexico                           | 2006       | Encuesta Nacional de Salud y Nutrición                                                | National                    | both                                  | 18+   | 18+         | 14471 | 21429  |
| Mexico                           | 2006       | PREVENIMSS National Coverage Surveys                                                  | Subnational                 | both                                  | 20+   | 20+         | 8715  | 11315  |
| Mexico                           | 2009-2010  | SAGE                                                                                  | National                    | both                                  | 50+   | 50+         | 796   | 1236   |
| Mexico                           | 2011-2012  | Encuesta Nacional de Salud Y Nutricion                                                | National                    | both                                  | 18+   | 18+         | 17511 | 23418  |
| Mexico                           | 2012       | The Mexican Health and Aging Study                                                    | National                    | both                                  | 50+   | 50+         | 786   | 1106   |
| Micronesia (Federated States of) | 2002       | STEPS                                                                                 | Subnational                 | both                                  | 25-64 | 25-64       | 591   | 892    |
| Micronesia (Federated States of) | 2006       | STEPS                                                                                 | Subnational                 | both                                  | 25-64 | 25-64       | 628   | 1160   |
| Micronesia (Federated States of) | 2008       | STEPS                                                                                 | Subnational                 | both                                  | 25-64 | 25-64       | 876   | 1264   |
| Micronesia (Federated States of) | 2009       | STEPS                                                                                 | Subnational                 | both                                  | 18-64 | 18-64       | 208   | 411    |
| Micronesia (Federated States of) | 2009       | STEPS                                                                                 | Subnational                 | both                                  | 18-64 | 18-64       | 392   | 518    |
| Moldova                          | 2005       | DHS                                                                                   | National                    | both                                  |       | 18-49       |       | 6268   |

| Country     | Data years | Survey/study name                                                                                                | Level of representativeness | Age range as used for global analysis |       | Sample size |      |        |
|-------------|------------|------------------------------------------------------------------------------------------------------------------|-----------------------------|---------------------------------------|-------|-------------|------|--------|
|             |            |                                                                                                                  |                             | Rural, urban, or both                 | Male  | Female      | Male | Female |
| Moldova     | 2013       | STEPS                                                                                                            | National                    | both                                  | 18-69 | 18-69       | 1712 | 2776   |
| Mongolia    | 1999       | National Nutrition Survey                                                                                        | National                    | both                                  | 35-65 | 35-65       | 907  | 1317   |
| Mongolia    | 2004       | National Nutrition Survey                                                                                        | National                    | both                                  | 18-74 | 18-74       | 248  | 360    |
| Mongolia    | 2005       | STEPS                                                                                                            | National                    | both                                  | 18-64 | 18-64       | 1513 | 1590   |
| Mongolia    | 2009       | STEPS                                                                                                            | National                    | both                                  | 18-64 | 18-64       | 2079 | 2965   |
| Mongolia    | 2013       | Global School-based Student Health Survey                                                                        | National                    | both                                  | 18-19 | 18-19       | 86   | 100    |
| Mongolia    | 2013       | STEPS                                                                                                            | National                    | both                                  | 18-64 | 18-64       | 2317 | 2807   |
| Morocco     | 1992       | DHS                                                                                                              | National                    | both                                  |       | 18-49       |      | 2873   |
| Morocco     | 2000       | National Survey 2000                                                                                             | National                    | both                                  | 20+   | 20+         | 755  | 1047   |
| Morocco     | 2003-2004  | DHS                                                                                                              | National                    | both                                  |       | 18-49       |      | 13944  |
| Mozambique  | 1997       | DHS                                                                                                              | National                    | both                                  |       | 18-49       |      | 3132   |
| Mozambique  | 2003       | DHS                                                                                                              | National                    | both                                  |       | 18-49       |      | 9241   |
| Mozambique  | 2005       | STEPS                                                                                                            | National                    | both                                  | 25-64 | 25-64       | 1276 | 1684   |
| Mozambique  | 2011       | DHS                                                                                                              | National                    | both                                  |       | 18-49       |      | 10396  |
| Myanmar     | 2003-2004  | STEPS                                                                                                            | Subnational                 | both                                  | 25-74 | 25-74       | 1992 | 2454   |
| Myanmar     | 2009-2010  | STEPS                                                                                                            | National                    | both                                  | 18-64 | 18-64       | 2732 | 4276   |
| Myanmar     | 2013-2014  | STEPS                                                                                                            | Subnational                 | both                                  | 25-74 | 25-74       | 745  | 741    |
| Namibia     | 1992       | DHS                                                                                                              | National                    | both                                  |       | 18-49       |      | 2221   |
| Namibia     | 2005       | STEPS                                                                                                            | National                    | both                                  | 24-64 | 24-64       | 1390 | 1776   |
| Namibia     | 2006-2007  | DHS                                                                                                              | National                    | both                                  |       | 18-49       |      | 7700   |
| Namibia     | 2006-2009  | Okambillimbili Survey                                                                                            | Community                   | urban                                 | 18+   | 18+         | 752  | 949    |
| Namibia     | 2013       | DHS                                                                                                              | National                    | both                                  |       | 18-64       |      | 4632   |
| Nauru       | 1975-1976  | Trends in the prevalence and incidence of non-insulin-dependent diabetes mellitus and impaired glucose tolerance | Subnational                 | both                                  | 18+   | 18+         | 233  | 240    |
| Nauru       | 1982       | Trends in the prevalence and incidence of non-insulin-dependent diabetes mellitus and impaired glucose tolerance | National                    | both                                  | 20+   | 20+         | 701  | 773    |
| Nauru       | 1987       | Trends in the prevalence and incidence of non-insulin-dependent diabetes mellitus and impaired glucose tolerance | National                    | both                                  | 20+   | 20+         | 555  | 667    |
| Nauru       | 1994       | Trends in the prevalence and incidence of non-insulin-dependent diabetes mellitus and impaired glucose tolerance | National                    | both                                  | 25+   | 25+         | 647  | 731    |
| Nauru       | 2004       | STEPS                                                                                                            | National                    | both                                  | 18-64 | 18-64       | 1011 | 1078   |
| Nauru       | 2006       | STEPS                                                                                                            | National                    | both                                  | 18-65 | 18-65       | 244  | 230    |
| Nepal       | 1996       | DHS                                                                                                              | National                    | both                                  |       | 18-49       |      | 3333   |
| Nepal       | 1997       | Ohno et al., Asia Pac J Public Health 18(3):20-9, 2006                                                           | Community                   | rural                                 | 18-75 | 18-75       | 36   | 41     |
| Nepal       | 2001       | DHS                                                                                                              | National                    | both                                  |       | 18-49       |      | 7646   |
| Nepal       | 2003       | STEPS                                                                                                            | Subnational                 | both                                  | 25-64 | 25-64       | 1010 | 996    |
| Nepal       | 2005       | STEPS                                                                                                            | Subnational                 | both                                  | 18-64 | 18-64       | 3650 | 4084   |
| Nepal       | 2006       | DHS                                                                                                              | National                    | both                                  |       | 18-49       |      | 8677   |
| Nepal       | 2011       | DHS                                                                                                              | National                    | both                                  |       | 18-49       |      | 5076   |
| Nepal       | 2013       | STEPS                                                                                                            | National                    | both                                  | 18-69 | 18-69       | 1276 | 2703   |
| Netherlands | 1985       | INTERSALT                                                                                                        | Community                   | urban                                 | 20-59 | 20-59       | 100  | 99     |
| Netherlands | 1985       | Zutphen Elderly Study                                                                                            | Community                   | both                                  | 65+   |             | 886  |        |
| Netherlands | 1989-1993  | The Rotterdam Study, first subcohort                                                                             | Community                   | urban                                 | 55+   | 55+         | 2807 | 4103   |
| Netherlands | 1992-1993  | LASA                                                                                                             | Subnational                 | both                                  | 55+   | 55+         | 1197 | 1206   |
| Netherlands | 1993-1995  | The Rotterdam Study, first subcohort                                                                             | Community                   | urban                                 | 56+   | 56+         | 2214 | 3105   |
| Netherlands | 1993-1997  | EPIC Bilthoven                                                                                                   | Community                   | urban                                 | 20-59 | 20-59       | 9941 | 12021  |
| Netherlands | 1993-1997  | EPIC Utrecht                                                                                                     | Community                   | both                                  |       | 49-70       |      | 17335  |
| Netherlands | 1997-1999  | The Rotterdam Study, first subcohort                                                                             | Community                   | urban                                 | 61+   | 61+         | 1718 | 2361   |
| Netherlands | 1998-2001  | Regenboog Project                                                                                                | National                    | both                                  | 18-89 | 18-89       | 2582 | 2490   |
| Netherlands | 2000-2001  | The Rotterdam Study, second subcohort                                                                            | Community                   | urban                                 | 55+   | 55+         | 1210 | 1468   |
| Netherlands | 2001-2003  | Surinamese in the Netherlands: Study on Ethnicity and Health                                                     | Community                   | urban                                 | 35-60 | 35-60       | 251  | 257    |
| Netherlands | 2002-2004  | The Rotterdam Study, first subcohort                                                                             | Community                   | urban                                 | 64+   | 64+         | 1206 | 1708   |
| Netherlands | 2003-2007  | Doetinchem Cohort Study (4th measurement)                                                                        | Subnational                 | urban                                 | 36-74 | 36-74       | 2125 | 2352   |
| Netherlands | 2004-2005  | The Rotterdam Study, second subcohort                                                                            | Community                   | urban                                 | 58+   | 58+         | 964  | 1244   |
| Netherlands | 2005-2006  | LASA (Wave F)                                                                                                    | National                    | both                                  | 55+   | 55+         | 789  | 958    |
| Netherlands | 2006-2008  | The Rotterdam Study, third subcohort                                                                             | Community                   | urban                                 | 45+   | 45+         | 1547 | 2029   |
| Netherlands | 2009-2010  | Measuring the Netherlands (NL de Maat)                                                                           | Subnational                 | both                                  | 30-70 | 30-70       | 1781 | 2014   |
| Netherlands | 2009-2011  | The Rotterdam Study, first subcohort                                                                             | Community                   | urban                                 | 72+   | 72+         | 690  | 1006   |
| Netherlands | 2011-2012  | The Rotterdam Study, second subcohort                                                                            | Community                   | urban                                 | 65+   | 65+         | 735  | 934    |
| Netherlands | 2011-2013  | Healthy Life in an Urban Setting                                                                                 | Community                   | urban                                 | 18-71 | 18-71       | 858  | 1011   |
| Netherlands | 2012-2014  | The Rotterdam Study, third subcohort                                                                             | Community                   | urban                                 | 52+   | 52+         | 1256 | 1639   |
| New Zealand | 1982       | MONICA, Auckland                                                                                                 | Community                   | urban                                 | 35-64 | 35-64       | 1019 | 568    |
| New Zealand | 1989       | The Life in New Zealand Survey                                                                                   | National                    | both                                  | 18+   | 18+         | 1345 | 1485   |
| New Zealand | 1990-1993  | Williams, N Z Med J 113(1114):308-11, 2000                                                                       | Community                   | both                                  | 18-21 | 18-21       | 932  | 859    |
| New Zealand | 1993-1994  | MONICA, Auckland                                                                                                 | Community                   | urban                                 | 35-64 | 35-64       | 723  | 674    |

| Country                        | Data years | Survey/study name                                                                                                               | Level of representativeness | Age range as used for global analysis |        | Sample size |          |          |
|--------------------------------|------------|---------------------------------------------------------------------------------------------------------------------------------|-----------------------------|---------------------------------------|--------|-------------|----------|----------|
|                                |            |                                                                                                                                 |                             | Rural, urban, or both                 | Male   | Female      | Male     | Female   |
| New Zealand                    | 1996-1997  | National Nutrition Survey                                                                                                       | National                    | both                                  | 18+    | 18+         | 1776     | 2423     |
| New Zealand                    | 2002-2003  | New Zealand Health Survey                                                                                                       | National                    | both                                  | 18+    | 18+         | 4438     | 6550     |
| New Zealand                    | 2006-2007  | New Zealand Health Survey                                                                                                       | National                    | both                                  | 18+    | 18+         | 4864     | 6271     |
| New Zealand                    | 2008-2009  | The Adult Nutrition Survey                                                                                                      | National                    | both                                  | 18+    | 18+         | 1754     | 2215     |
| New Zealand                    | 2011-2012  | New Zealand Health Survey                                                                                                       | National                    | both                                  | 18+    | 18+         | 4396     | 5948     |
| New Zealand                    | 2012-2013  | New Zealand Health Survey                                                                                                       | National                    | both                                  | 18+    | 18+         | 4967     | 6602     |
| New Zealand                    | 2013-2014  | New Zealand Health Survey                                                                                                       | National                    | both                                  | 18+    | 18+         | 5396     | 6807     |
| Nicaragua                      | 1997-1998  | DHS                                                                                                                             | National                    | both                                  |        | 18-49       |          | 10322    |
| Nicaragua                      | 2001       | DHS                                                                                                                             | National                    | both                                  |        | 18-49       |          | 10195    |
| Nicaragua                      | 2003-2004  | CAMDI                                                                                                                           | Community                   | urban                                 | 20+    | 20+         | 773      | 916      |
| Nicaragua                      | 2003-2005  | Sistema Integrado de Vigilancia de Intervenciones Nutricionales (SIVIN)                                                         | National                    | both                                  |        | 18-50       |          | 1115     |
| Nicaragua                      | 2006-2007  | Encuesta Nicaraguense de Demografía y Salud                                                                                     | National                    | both                                  |        | 18-49       |          | 11765    |
| Niger                          | 1992       | DHS                                                                                                                             | National                    | both                                  |        | 18-49       |          | 3207     |
| Niger                          | 1998       | DHS                                                                                                                             | National                    | both                                  |        | 18-49       |          | 3257     |
| Niger                          | 2006       | DHS                                                                                                                             | National                    | both                                  |        | 18-49       |          | 3590     |
| Niger                          | 2007       | STEPS                                                                                                                           | National                    | both                                  | 18-64  | 18-64       | 1356     | 1131     |
| Niger                          | 2012       | DHS                                                                                                                             | National                    | both                                  |        | 18-49       |          | 3936     |
| Nigeria                        | 1990       | Non-communicable diseases National Survey                                                                                       | National                    | rural                                 | 18+    | 18+         | 3618.915 | 3681.719 |
| Nigeria                        | 1990       | Non-communicable diseases National Survey                                                                                       | National                    | urban                                 | 18+    | 18+         | 1616.934 | 1644.995 |
| Nigeria                        | 1991-1994  | Cooper et al., Am J Public Health 87(2):160-68, 1997                                                                            | Community                   | both                                  | 20-100 | 20-100      | 910      | 1080     |
| Nigeria                        | 1999       | DHS                                                                                                                             | National                    | both                                  |        | 18-49       |          | 2134     |
| Nigeria                        | 1999-2009  | Prostate cancer dietary risk factors study                                                                                      | Subnational                 | both                                  | 35+    |             | 627      |          |
| Nigeria                        | 2003       | DHS                                                                                                                             | National                    | both                                  |        | 18-49       |          | 5664     |
| Nigeria                        | 2006       | Senbanjo et al., West Afr J Med 30(6):425-31, 2011                                                                              | Community                   | urban                                 | 18-19  | 18-19       | 10       | 12       |
| Nigeria                        | 2007       | Ibadan Study of Ageing                                                                                                          | Subnational                 | both                                  | 60+    | 60+         | 642      | 914      |
| Nigeria                        | 2008       | DHS                                                                                                                             | National                    | both                                  |        | 18-49       |          | 25420    |
| Nigeria                        | 2008       | Ibadan Study of Ageing                                                                                                          | Subnational                 | both                                  | 61+    | 61+         | 453      | 656      |
| Nigeria                        | 2009       | Ibadan Study of Ageing                                                                                                          | Subnational                 | both                                  | 62+    | 62+         | 420      | 619      |
| Nigeria                        | 2009       | Community Health Plan - Kwara Central Survey                                                                                    | Community                   | rural                                 | 18+    | 18+         | 1247     | 1418     |
| Nigeria                        | 2011       | Community Health Plan - Kwara Central Survey                                                                                    | Community                   | rural                                 | 18+    | 18+         | 396      | 494      |
| Nigeria                        | 2013       | DHS                                                                                                                             | National                    | both                                  |        | 18-49       |          | 29350    |
| Nigeria                        | 2013       | Community Health Plan - Kwara Central Survey                                                                                    | Community                   | rural                                 | 18+    | 18+         | 358      | 422      |
| Niue                           | 2011       | STEPS                                                                                                                           | National                    | both                                  | 18-100 | 18-100      | 376      | 454      |
| Norway                         | 1979-1980  | Jacobsen et al., Scand J Soc Med 16(2):101-4, 1988                                                                              | Community                   | urban                                 | 20-54  | 20-49       | 8309     | 7820     |
| Norway                         | 1984-1986  | HUNT1 Study                                                                                                                     | Subnational                 | rural                                 | 20+    | 20+         | 36517    | 37811    |
| Norway                         | 1986-1987  | Tromsø Study 3                                                                                                                  | Community                   | urban                                 | 20-61  | 20-56       | 10367    | 9798     |
| Norway                         | 1994-1995  | Tromsø Study 4                                                                                                                  | Community                   | urban                                 | 25+    | 25+         | 12774    | 13813    |
| Norway                         | 1995-1997  | HUNT2 study                                                                                                                     | Subnational                 | rural                                 | 20+    | 20+         | 30285    | 33599    |
| Norway                         | 1995-1997  | Young-HUNT1 Study                                                                                                               | Subnational                 | rural                                 | 18-21  | 18-21       | 634      | 686      |
| Norway                         | 1997-1999  | HUSK                                                                                                                            | Community                   | urban                                 | 47-73  | 47-73       | 1635     | 1670     |
| Norway                         | 2000-2001  | Young-HUNT2 Study                                                                                                               | Subnational                 | rural                                 | 18-21  | 18-21       | 379      | 498      |
| Norway                         | 2000-2003  | the Oslo cohort (HUBBRO), the Oppland and Hedmark cohort (OPPHED), and the Troms and Finnmark cohort (TROFINN) of COHORT NORWAY | Subnational                 | both                                  | 30-76  | 30-76       | 16825    | 20592    |
| Norway                         | 2001-2002  | Tromsø Study 5                                                                                                                  | Community                   | urban                                 | 30-84  | 30-84       | 2974     | 4152     |
| Norway                         | 2006-2008  | HUNT3 Study                                                                                                                     | Subnational                 | rural                                 | 20+    | 20+         | 22860    | 27553    |
| Norway                         | 2006-2008  | Young-HUNT3 Study                                                                                                               | Subnational                 | rural                                 | 18-21  | 18-21       | 442      | 519      |
| Norway                         | 2007-2008  | Tromsø Study 6                                                                                                                  | Community                   | urban                                 | 30-87  | 30-87       | 6044     | 6880     |
| Occupied Palestinian Territory | 1996       | Stene et al., Eur J Clin Nutr 55(9):805-11, 2001                                                                                | Community                   | rural                                 | 30-65  | 30-65       | 208      | 269      |
| Occupied Palestinian Territory | 1996-1998  | Ramallah study                                                                                                                  | Community                   | rural                                 | 18-64  | 18-64       | 206      | 442      |
| Occupied Palestinian Territory | 1996-1998  | Ramallah study                                                                                                                  | Community                   | urban                                 | 18-64  | 18-64       | 182      | 458      |
| Occupied Palestinian Territory | 1999-2000  | The First National Health and Nutrition Survey                                                                                  | National                    | both                                  | 18-64  | 18-64       | 1736     | 1869     |
| Occupied Palestinian Territory | 2010       | STEPS                                                                                                                           | National                    | both                                  | 18-64  | 18-64       | 1851     | 3364     |
| Oman                           | 1991       | Oman National Health survey                                                                                                     | National                    | both                                  | 20+    | 20+         | 2128     | 2958     |
| Oman                           | 2000       | Oman National Health survey                                                                                                     | National                    | both                                  | 20+    | 20+         | 3069     | 3331     |
| Oman                           | 2001       | Al-Lawati et al., Diabetes Care 26(6):1781-85, 2003                                                                             | Community                   | urban                                 | 20+    | 20+         | 755      | 756      |
| Oman                           | 2006       | STEPS                                                                                                                           | Community                   | urban                                 | 20-59  | 20-59       | 540      | 732      |
| Oman                           | 2008       | The Oman World Health Survey                                                                                                    | National                    | both                                  | 18+    | 18+         | 2258.548 | 2227.527 |
| Pakistan                       | 1990-1994  | MHS                                                                                                                             | Community                   | urban                                 | 18+    | 18+         | 432      | 478      |
| Pakistan                       | 1990-1994  | National Health Survey Of Pakistan 1990-1994                                                                                    | National                    | both                                  | 18+    | 18+         | 3789     | 4346     |
| Pakistan                       | 1999       | Shah et al., Trop Med Int Health 9(4):526-32, 2004                                                                              | Community                   | both                                  | 18+    | 18+         | 1391     | 2754     |
| Pakistan                       | 2004-2005  | COBRA-1                                                                                                                         | Community                   | urban                                 | 40+    | 40+         | 1500     | 1635     |
| Pakistan                       | 2005       | STEPS                                                                                                                           | National                    | both                                  | 25-65  | 25-65       | 787      | 1071     |



| Country          | Data years | Survey/study name                                                                                                                                  | Level of representativeness | Age range as used for global analysis |       | Sample size |       |
|------------------|------------|----------------------------------------------------------------------------------------------------------------------------------------------------|-----------------------------|---------------------------------------|-------|-------------|-------|
|                  |            |                                                                                                                                                    |                             | Rural, urban, or both                 | Male  | Female      | Male  |
| Pakistan         | 2011       | National and Nutritional Survey                                                                                                                    | National                    | both                                  | 18-49 |             | 21848 |
| Pakistan         | 2012-2013  | DHS                                                                                                                                                | National                    | both                                  | 18-49 |             | 4105  |
| Palau            | 2013       | STEPS                                                                                                                                              | National                    | both                                  | 25-64 | 25-64       | 1029  |
| Panama           | 2003       | Second Living Standards Survey                                                                                                                     | National                    | both                                  | 18-75 | 18-75       | 6844  |
| Panama           | 2010-2011  | Prevalencia de factores de riesgo asociados a enfermedad cardiovascular 2010-2011                                                                  | Subnational                 | both                                  | 18+   | 18+         | 1067  |
| Papua New Guinea | 1985-1986  | INTERSALT                                                                                                                                          | Community                   | rural                                 | 20-59 | 20-59       | 88    |
| Papua New Guinea | 2007       | STEPS                                                                                                                                              | National                    | both                                  | 18-64 | 18-64       | 1281  |
| Peru             | 1991-1992  | DHS                                                                                                                                                | National                    | both                                  |       | 18-49       | 5120  |
| Peru             | 1996       | DHS                                                                                                                                                | National                    | both                                  |       | 18-49       | 10616 |
| Peru             | 2000       | DHS                                                                                                                                                | National                    | both                                  |       | 18-49       | 22078 |
| Peru             | 2002-2003  | Mohanna et al., High Alt Med Biol 7(3):245-55, 2006                                                                                                | Community                   | rural                                 | 25-74 | 25-74       | 38    |
| Peru             | 2003-2007  | FRENT                                                                                                                                              | Subnational                 | urban                                 | 18+   | 18+         | 1052  |
| Peru             | 2004-2005  | Cardiovascular Risk factors Multiple Evaluation in Latin America                                                                                   | Community                   | urban                                 | 25-64 | 25-64       | 769   |
| Peru             | 2004-2005  | Encuesta Nacional de Indicadores Nutricionales, Bioquímicos, Socioeconómicos y Culturales Relacionados con las Enfermedades Crónicas Degenerativas | National                    | both                                  | 20-95 | 20-95       | 2087  |
| Peru             | 2004-2006  | DHS                                                                                                                                                | National                    | both                                  |       | 18-49       | 5030  |
| Peru             | 2007-2008  | DHS                                                                                                                                                | National                    | both                                  |       | 18-49       | 18357 |
| Peru             | 2007-2008  | PERU MIGRANT Study                                                                                                                                 | Community                   | both                                  | 35+   | 35+         | 405   |
| Peru             | 2009       | DHS                                                                                                                                                | National                    | both                                  |       | 18-49       | 20119 |
| Peru             | 2009-2010  | Componente Nutricional Encuesta Nacional de Hogares                                                                                                | National                    | both                                  | 18+   | 18+         | 17730 |
| Peru             | 2009-2012  | CRONICAS Cohort Study                                                                                                                              | Subnational                 | both                                  | 35+   | 35+         | 1557  |
| Peru             | 2010       | DHS                                                                                                                                                | National                    | both                                  |       | 18-49       | 19529 |
| Peru             | 2011       | DHS                                                                                                                                                | National                    | both                                  |       | 18-49       | 19429 |
| Peru             | 2012       | DHS                                                                                                                                                | National                    | both                                  |       | 18-49       | 20859 |
| Peru             | 2013       | DHS                                                                                                                                                | National                    | both                                  |       | 18-49       | 20063 |
| Peru             | 2014       | DHS                                                                                                                                                | National                    | both                                  |       | 18-49       | 21991 |
| Philippines      | 1983-1984  | Cebu Longitudinal Health and Nutrition Survey Baseline 2-Month Followup                                                                            | Community                   | both                                  |       | 18-50       | 2783  |
| Philippines      | 1983-1984  | Cebu Longitudinal Health and Nutrition Survey Baseline 4-Month Followup                                                                            | Community                   | both                                  |       | 18-50       | 2659  |
| Philippines      | 1983-1984  | Cebu Longitudinal Health and Nutrition Survey Baseline 6-Month Followup                                                                            | Community                   | both                                  |       | 18-50       | 2545  |
| Philippines      | 1984-1985  | Cebu Longitudinal Health and Nutrition Survey Baseline 8-Month Followup                                                                            | Community                   | both                                  |       | 18-50       | 2435  |
| Philippines      | 1984-1985  | Cebu Longitudinal Health and Nutrition Survey Baseline 10-Month Followup                                                                           | Community                   | both                                  |       | 18-50       | 2317  |
| Philippines      | 1984-1985  | Cebu Longitudinal Health and Nutrition Survey Baseline 12-Month Followup                                                                           | Community                   | both                                  |       | 18-50       | 2235  |
| Philippines      | 1984-1985  | Cebu Longitudinal Health and Nutrition Survey Baseline 14-Month Followup                                                                           | Community                   | both                                  |       | 18-50       | 2169  |
| Philippines      | 1984-1985  | Cebu Longitudinal Health and Nutrition Survey Baseline 16-Month Followup                                                                           | Community                   | both                                  |       | 18-50       | 2113  |
| Philippines      | 1984-1985  | Cebu Longitudinal Health and Nutrition Survey Baseline 18-Month Followup                                                                           | Community                   | both                                  |       | 18-50       | 2066  |
| Philippines      | 1985-1986  | Cebu Longitudinal Health and Nutrition Survey Baseline 20-Month Followup                                                                           | Community                   | both                                  |       | 18-50       | 2038  |
| Philippines      | 1985-1986  | Cebu Longitudinal Health and Nutrition Survey Baseline 22-Month Followup                                                                           | Community                   | both                                  |       | 18-50       | 2006  |
| Philippines      | 1985-1986  | Cebu Longitudinal Health and Nutrition Survey Baseline 24-Month Followup                                                                           | Community                   | both                                  |       | 18-50       | 2015  |
| Philippines      | 1988       | INCLIN                                                                                                                                             | Community                   | rural                                 | 35-65 |             | 274   |
| Philippines      | 1991-1992  | Cebu Longitudinal Health and Nutrition Survey 1991 Mother Followup                                                                                 | Community                   | both                                  |       | 22-55       | 2195  |
| Philippines      | 1993       | 4th National Nutrition Survey Philippine                                                                                                           | National                    | both                                  | 20-70 | 20-70       | 4383  |
| Philippines      | 1993       | National Safe Motherhood Survey                                                                                                                    | National                    | both                                  |       | 18-49       | 7181  |
| Philippines      | 1994-1995  | Cebu Longitudinal Health and Nutrition Survey 1994-1995 Mother Followup                                                                            | Community                   | both                                  |       | 18-59       | 2552  |
| Philippines      | 1998       | 5th National Nutrition Survey Philippine                                                                                                           | National                    | both                                  | 20-60 | 20-60       | 1323  |
| Philippines      | 1998-1999  | Cebu Longitudinal Health and Nutrition Survey 1998-1999 Mother Followup                                                                            | Community                   | both                                  |       | 18-59       | 1911  |
| Philippines      | 2002       | Cebu Longitudinal Health and Nutrition Survey 2002 Child Followup                                                                                  | Community                   | both                                  | 18-19 | 18-19       | 1084  |
| Philippines      | 2002       | Cebu Longitudinal Health and Nutrition Survey 2002 Mother Followup                                                                                 | Community                   | both                                  |       | 32-66       | 2080  |
| Philippines      | 2003-2004  | National Nutrition and Health Survey                                                                                                               | National                    | both                                  | 18+   | 18+         | 30231 |
| Philippines      | 2005       | Cebu Longitudinal Health and Nutrition Survey 2005 Child Followup                                                                                  | Community                   | both                                  | 20-22 | 20-22       | 1006  |
| Philippines      | 2005       | Cebu Longitudinal Health and Nutrition Survey 2005 Mother Followup                                                                                 | Community                   | both                                  |       | 35-69       | 2001  |
| Philippines      | 2007       | Cebu Longitudinal Health and Nutrition Survey 2007 Child Followup                                                                                  | Community                   | both                                  | 23-24 | 23-24       | 937   |
| Philippines      | 2007       | Cebu Longitudinal Health and Nutrition Survey 2007 Mother Followup                                                                                 | Community                   | both                                  |       | 38-71       | 1925  |
| Philippines      | 2009       | Cebu Longitudinal Health and Nutrition Survey 2009 Child Followup                                                                                  | Community                   | both                                  | 24-26 | 24-26       | 864   |
| Philippines      | 2009       | Life Course Study in Cardiovascular Disease Epidemiology                                                                                           | Subnational                 | both                                  | 20-50 | 20-50       | 1329  |
| Poland           | 1983-1984  | MONICA, Tarnobrzeg Voivodship                                                                                                                      | Community                   | rural                                 | 35-64 | 35-64       | 1236  |
| Poland           | 1983-1985  | MONICA, Warsaw                                                                                                                                     | Community                   | urban                                 | 35-64 | 35-64       | 1297  |
| Poland           | 1986       | Poland Conscripts 10% Sample Cohort                                                                                                                | National                    | both                                  | 18-19 |             | 29421 |
| Poland           | 1986       | INTERSALT, Krakow                                                                                                                                  | Community                   | urban                                 | 20-59 | 20-59       | 100   |
| Poland           | 1986       | INTERSALT, Warsaw                                                                                                                                  | Community                   | urban                                 | 20-59 | 20-59       | 100   |
| Poland           | 1987-1988  | MONICA, Tarnobrzeg Voivodship                                                                                                                      | Community                   | rural                                 | 35-64 | 35-64       | 616   |
| Poland           | 1988-1989  | MONICA, Warsaw                                                                                                                                     | Community                   | urban                                 | 35-64 | 35-64       | 705   |
| Poland           | 1992-1993  | MONICA, Tarnobrzeg Voivodship                                                                                                                      | Community                   | rural                                 | 35-64 | 35-64       | 618   |

| Country            | Data years | Survey/study name                                                                                                      | Level of representativeness | Age range as used for global analysis |       | Sample size |        |        |
|--------------------|------------|------------------------------------------------------------------------------------------------------------------------|-----------------------------|---------------------------------------|-------|-------------|--------|--------|
|                    |            |                                                                                                                        |                             | Rural, urban, or both                 | Male  | Female      | Male   | Female |
| Poland             | 1993       | MONICA, Warsaw                                                                                                         | Community                   | urban                                 | 35-64 | 35-64       | 751    | 763    |
| Poland             | 1995       | Poland Conscripts 10% Sample Cohort                                                                                    | National                    | both                                  | 18-19 |             | 31043  |        |
| Poland             | 2000       | Binkowska-Bury et al., Neuro Endocrinol Lett 34(8):814-20, 2013                                                        | Subnational                 | both                                  | 19-20 |             | 3003   |        |
| Poland             | 2000-2001  | Household Food Consumption and Anthropometric Survey                                                                   | National                    | both                                  | 18+   | 18+         | 1287   | 1613   |
| Poland             | 2001       | Binkowska-Bury et al., Neuro Endocrinol Lett 34(8):814-20, 2013                                                        | Subnational                 | both                                  | 19-20 |             | 3420   |        |
| Poland             | 2001       | Poland Conscripts 10% Sample Cohort                                                                                    | National                    | both                                  | 18-19 |             | 31213  |        |
| Poland             | 2002       | Binkowska-Bury et al., Neuro Endocrinol Lett 34(8):814-20, 2013                                                        | Subnational                 | both                                  | 19-20 |             | 3544   |        |
| Poland             | 2002-2005  | Health, Alcohol and Psychosocial factors In Eastern Europe                                                             | Community                   | urban                                 | 45-69 | 45-69       | 4454   | 4720   |
| Poland             | 2003       | Binkowska-Bury et al., Neuro Endocrinol Lett 34(8):814-20, 2013                                                        | Subnational                 | both                                  | 19-20 |             | 3633   |        |
| Poland             | 2003       | The European Male Ageing Study                                                                                         | Community                   | both                                  | 40+   |             | 406    |        |
| Poland             | 2003-2005  | National Multicenter Health Survey in Poland. Project WOBASZ                                                           | National                    | both                                  | 20-74 | 20-74       | 6245   | 6907   |
| Poland             | 2003-2013  | Mogielica Human Ecology Study                                                                                          | Community                   | rural                                 | 21+   | 21+         | 353    | 896    |
| Poland             | 2004       | Binkowska-Bury et al., Neuro Endocrinol Lett 34(8):814-20, 2013                                                        | Subnational                 | both                                  | 19-20 |             | 3538   |        |
| Poland             | 2005       | Binkowska-Bury et al., Neuro Endocrinol Lett 34(8):814-20, 2013                                                        | Subnational                 | both                                  | 19-20 |             | 3308   |        |
| Poland             | 2006       | Binkowska-Bury et al., Neuro Endocrinol Lett 34(8):814-20, 2013                                                        | Subnational                 | both                                  | 19-20 |             | 3701   |        |
| Poland             | 2006-2007  | National Multicenter Health Survey in Poland. Project WOBASZ                                                           | National                    | both                                  | 75+   | 75+         | 541    | 533    |
| Poland             | 2007       | Binkowska-Bury et al., Neuro Endocrinol Lett 34(8):814-20, 2013                                                        | Subnational                 | both                                  | 19-20 |             | 3612   |        |
| Poland             | 2007-2009  | Elaboration of the reference range of arterial blood pressure for the population of children and adolescents in Poland | National                    | both                                  | 18-19 | 18-19       | 435    | 591    |
| Poland             | 2007-2011  | Medical, psychological and socioeconomic aspects of aging in Poland                                                    | National                    | both                                  | 55+   | 55+         | 2750   | 2582   |
| Poland             | 2008       | Binkowska-Bury et al., Neuro Endocrinol Lett 34(8):814-20, 2013                                                        | Subnational                 | both                                  | 19-20 |             | 3435   |        |
| Poland             | 2008       | The European Male Ageing Study                                                                                         | Community                   | both                                  | 40+   |             | 310    |        |
| Poland             | 2009       | Binkowska-Bury et al., Neuro Endocrinol Lett 34(8):814-20, 2013                                                        | Subnational                 | both                                  | 19-20 |             | 3405   |        |
| Poland             | 2010       | Binkowska-Bury et al., Neuro Endocrinol Lett 34(8):814-20, 2013                                                        | Subnational                 | both                                  | 19-20 |             | 3317   |        |
| Poland             | 2011       | NATPOL                                                                                                                 | National                    | both                                  | 18-79 | 18-79       | 1158   | 1235   |
| Portugal           | 1985       | Body Mass Index of Portuguese Conscript                                                                                | National                    | both                                  | 18-20 |             | 29420  |        |
| Portugal           | 1986       | Body Mass Index of Portuguese Conscript                                                                                | National                    | both                                  | 18-20 |             | 70504  |        |
| Portugal           | 1986       | INTERSALT                                                                                                              | Community                   | both                                  | 20-59 | 20-59       | 99     | 99     |
| Portugal           | 1987       | Body Mass Index of Portuguese Conscript                                                                                | National                    | both                                  | 18-20 |             | 68079  |        |
| Portugal           | 1988       | Body Mass Index of Portuguese Conscript                                                                                | National                    | both                                  | 18-20 |             | 67573  |        |
| Portugal           | 1989       | Body Mass Index of Portuguese Conscript                                                                                | National                    | both                                  | 18-20 |             | 68827  |        |
| Portugal           | 1990       | Body Mass Index of Portuguese Conscript                                                                                | National                    | both                                  | 18-20 |             | 44359  |        |
| Portugal           | 1991       | Body Mass Index of Portuguese Conscript                                                                                | National                    | both                                  | 18-20 |             | 19552  |        |
| Portugal           | 1992       | Body Mass Index of Portuguese Conscript                                                                                | National                    | both                                  | 18-20 |             | 52393  |        |
| Portugal           | 1993       | Body Mass Index of Portuguese Conscript                                                                                | National                    | both                                  | 18-20 |             | 59780  |        |
| Portugal           | 1994       | Body Mass Index of Portuguese Conscript                                                                                | National                    | both                                  | 18-20 |             | 55511  |        |
| Portugal           | 1995       | Body Mass Index of Portuguese Conscript                                                                                | National                    | both                                  | 18-20 |             | 68221  |        |
| Portugal           | 1996       | Body Mass Index of Portuguese Conscript                                                                                | National                    | both                                  | 18-21 |             | 106097 |        |
| Portugal           | 1997       | Body Mass Index of Portuguese Conscript                                                                                | National                    | both                                  | 18-21 |             | 61215  |        |
| Portugal           | 1998       | Body Mass Index of Portuguese Conscript                                                                                | National                    | both                                  | 18-21 |             | 41027  |        |
| Portugal           | 1999       | Body Mass Index of Portuguese Conscript                                                                                | National                    | both                                  | 18-21 |             | 54187  |        |
| Portugal           | 1999-2003  | EPIPorto                                                                                                               | Community                   | urban                                 | 18+   | 18+         | 932    | 1507   |
| Portugal           | 2000       | Body Mass Index of Portuguese Conscript                                                                                | National                    | both                                  | 18-21 |             | 53326  |        |
| Portugal           | 2003-2005  | Estudo de Prevalencia da Obesidade e Consumos Alimentares em Portugal                                                  | National                    | both                                  | 18-64 | 18-64       | 3796   | 4320   |
| Portugal           | 2007-2009  | Portuguese National Survey of Physical Activity and Physical Fitness                                                   | National                    | both                                  | 18+   | 18+         | 4693   | 7178   |
| Portugal           | 2010-2012  | Exercise for Elderly                                                                                                   | Community                   | urban                                 | 60-84 | 60-84       | 48     | 104    |
| Puerto Rico        | 2002-2003  | Puerto Rican Elderly: Health Conditions                                                                                | National                    | both                                  | 60+   | 60+         | 1914   | 2850   |
| Puerto Rico        | 2005-2007  | Perez et al., Ethn Dis 18(4):434-41, 2008                                                                              | Community                   | urban                                 | 18-84 | 18-84       | 275    | 529    |
| Puerto Rico        | 2006-2007  | Puerto Rican Elderly: Health Conditions                                                                                | National                    | both                                  | 60+   | 60+         | 1056   | 1669   |
| Puerto Rico        | 2010-2013  | HPV Infection in a Population-Based Sample of Puerto Rican Women                                                       | Subnational                 | both                                  |       | 18-64       |        | 557    |
| Qatar              | 2006       | GCC                                                                                                                    | National                    | both                                  | 18+   | 18+         | 1859   | 2018   |
| Qatar              | 2012       | STEPS                                                                                                                  | National                    | both                                  | 18-64 | 18-64       | 1034   | 1352   |
| Romania            | 1986-1987  | MONICA, Bucharest                                                                                                      | Community                   | urban                                 | 35-64 | 35-64       | 702    | 873    |
| Romania            | 1997       | Somatometria                                                                                                           | National                    | both                                  | 18-75 | 18-75       | 3142   | 4063   |
| Romania            | 2009-2011  | Study on children in Dolj County, South Romania                                                                        | Subnational                 | both                                  | 18-21 | 18-21       | 87     | 38     |
| Romania            | 2014       | Timis County Study                                                                                                     | Community                   | urban                                 | 18-19 | 18-19       | 8      | 5      |
| Russian Federation | 1984-1986  | MONICA, Moscow (control)                                                                                               | Community                   | urban                                 | 35-64 | 35-64       | 774    | 642    |
| Russian Federation | 1984-1986  | MONICA, Moscow, Leninsky district                                                                                      | Community                   | urban                                 | 35-64 | 35-64       | 553    | 622    |
| Russian Federation | 1984-1986  | MONICA, Moscow, Chermushkinsky district                                                                                | Community                   | urban                                 | 35-64 | 35-64       | 580    | 579    |
| Russian Federation | 1985       | MONICA, Novosibirsk (intervention)                                                                                     | Community                   | urban                                 | 25-64 | 25-64       | 797    | 818    |
| Russian Federation | 1985-1986  | MONICA, Novosibirsk, Kirowsky district                                                                                 | Community                   | urban                                 | 25-64 | 25-64       | 758    | 774    |
| Russian Federation | 1985-1986  | MONICA, Novosibirsk, Leninsky district                                                                                 | Community                   | urban                                 | 25-64 | 25-64       | 624    | 624    |

| Country               | Data years | Survey/study name                                                                  | Level of representativeness | Age range as used for global analysis |        | Sample size |          |          |
|-----------------------|------------|------------------------------------------------------------------------------------|-----------------------------|---------------------------------------|--------|-------------|----------|----------|
|                       |            |                                                                                    |                             | Rural, urban, or both                 | Male   | Female      | Male     | Female   |
| Russian Federation    | 1986       | INTERSALT                                                                          | Community                   | urban                                 | 20-59  | 20-59       | 97       | 97       |
| Russian Federation    | 1988       | MONICA, Novosibirsk (intervention)                                                 | Community                   | urban                                 | 25-64  | 25-64       | 837      | 852      |
| Russian Federation    | 1988-1989  | MONICA, Moscow (control)                                                           | Community                   | urban                                 | 35-64  | 35-64       | 620      | 581      |
| Russian Federation    | 1988-1989  | MONICA, Moscow, Leninsky district                                                  | Community                   | urban                                 | 35-64  | 35-64       | 597      | 612      |
| Russian Federation    | 1988-1989  | MONICA, Novosibirsk, Kirowsky district                                             | Community                   | urban                                 | 25-64  | 25-64       | 871      | 705      |
| Russian Federation    | 1992       | CINDI                                                                              | Community                   | rural                                 | 25-64  | 25-64       | 377      | 453      |
| Russian Federation    | 1992       | Puska et al., Int J Epidemiol 22(6):1048-55, 1993                                  | Community                   | both                                  | 25-64  | 25-64       | 379      | 458      |
| Russian Federation    | 1992-1993  | Russia Longitudinal Monitoring Survey-Higher School of Economics Round II          | National                    | both                                  | 18+    | 18+         | 4362     | 5940     |
| Russian Federation    | 1992-1995  | MONICA, Moscow (control)                                                           | Community                   | urban                                 | 35-64  | 35-64       | 556      | 527      |
| Russian Federation    | 1992-1995  | MONICA, Moscow, Leninsky district                                                  | Community                   | urban                                 | 35-64  | 35-64       | 538      | 858      |
| Russian Federation    | 1993       | Russia Longitudinal Monitoring Survey-Higher School of Economics Round III         | National                    | both                                  | 18+    | 18+         | 4522     | 6327     |
| Russian Federation    | 1993-1994  | Russia Longitudinal Monitoring Survey-Higher School of Economics Round IV          | National                    | both                                  | 18+    | 18+         | 4037     | 5669     |
| Russian Federation    | 1994       | Russia Longitudinal Monitoring Survey-Higher School of Economics Round V           | National                    | both                                  | 18+    | 18+         | 3575     | 4704     |
| Russian Federation    | 1994-1995  | MONICA, Novosibirsk (intervention)                                                 | Community                   | urban                                 | 25-64  | 25-64       | 820      | 860      |
| Russian Federation    | 1995       | MONICA, Novosibirsk, Kirowsky district                                             | Community                   | urban                                 | 25-64  | 25-64       | 771      | 787      |
| Russian Federation    | 1995       | Russia Longitudinal Monitoring Survey-Higher School of Economics Round VI          | National                    | both                                  | 18+    | 18+         | 3365     | 4459     |
| Russian Federation    | 1996       | Russia Longitudinal Monitoring Survey-Higher School of Economics Round VII         | National                    | both                                  | 18+    | 18+         | 3318     | 4428     |
| Russian Federation    | 1998-1999  | Russia Longitudinal Monitoring Survey-Higher School of Economics Round VIII        | National                    | both                                  | 18+    | 18+         | 3433     | 4553     |
| Russian Federation    | 2000       | Russia Longitudinal Monitoring Survey-Higher School of Economics Round IX          | National                    | both                                  | 18+    | 18+         | 3521     | 4771     |
| Russian Federation    | 2001       | Russia Longitudinal Monitoring Survey-Higher School of Economics Round X           | National                    | both                                  | 18+    | 18+         | 3881     | 5387     |
| Russian Federation    | 2002       | Russia Longitudinal Monitoring Survey-Higher School of Economics Round XI          | National                    | both                                  | 18+    | 18+         | 4070     | 5542     |
| Russian Federation    | 2002-2005  | Health, Alcohol and Psychosocial Factors In Eastern Europe                         | Community                   | urban                                 | 45-69  | 45-69       | 4208     | 5040     |
| Russian Federation    | 2003       | Russia Longitudinal Monitoring Survey-Higher School of Economics Round XII         | National                    | both                                  | 18+    | 18+         | 4132     | 5631     |
| Russian Federation    | 2004       | Russia Longitudinal Monitoring Survey-Higher School of Economics Round XIII        | National                    | both                                  | 18+    | 18+         | 4149     | 5645     |
| Russian Federation    | 2005       | Russia Longitudinal Monitoring Survey-Higher School of Economics Round XIV         | National                    | both                                  | 18+    | 18+         | 4025     | 5498     |
| Russian Federation    | 2007-2010  | SAGE                                                                               | National                    | both                                  | 50+    | 50+         | 1254     | 2251     |
| Rwanda                | 2000       | DHS                                                                                | National                    | both                                  |        | 18-49       |          | 7591     |
| Rwanda                | 2005       | DHS                                                                                | National                    | both                                  |        | 18-49       |          | 4381     |
| Rwanda                | 2010       | DHS                                                                                | National                    | both                                  | 18-59  | 18-49       | 5536     | 5559     |
| Rwanda                | 2012       | STEPS                                                                              | National                    | both                                  | 18-64  | 18-64       | 2486     | 3995     |
| Saint Kitts and Nevis | 2007       | STEPS                                                                              | Subnational                 | both                                  | 25-64  | 25-64       | 511      | 849      |
| Saint Lucia           | 1981       | Population Study of Blood Pressure and Associated Factors in St Lucia, West Indies | National                    | both                                  | 18+    | 18+         | 168      | 191      |
| Saint Lucia           | 1991-1994  | Cooper et al., Am J Public Health 87(2):160-68, 1997                               | Community                   | urban                                 | 25-100 | 25-100      | 491      | 593      |
| Saint Lucia           | 2012       | STEPS                                                                              | National                    | both                                  | 25-64  | 25-64       | 587      | 939      |
| Samoa                 | 1979-1982  | McGarvey, Am J Clin Nutr 53(6 Suppl):1586S-1594S, 1991                             | National                    | both                                  | 18+    | 18+         | 247      | 297      |
| Samoa                 | 1991       | McGarvey, Pac Health Dialog 8(1):157-62, 2001                                      | National                    | both                                  | 25+    | 25+         | 347      | 381      |
| Samoa                 | 1995       | McGarvey, Pac Health Dialog 8(1):157-62, 2001                                      | National                    | both                                  | 25+    | 25+         | 156      | 153      |
| Samoa                 | 2002       | STEPS                                                                              | National                    | both                                  | 25-64  | 25-64       | 1181     | 1334     |
| Samoa                 | 2010       | Samoa Genome-Wide Association Study                                                | National                    | both                                  | 24-65  | 24-65       | 1402     | 2061     |
| Samoa                 | 2013       | STEPS                                                                              | National                    | both                                  | 18-64  | 18-64       | 605      | 918      |
| Sao Tome and Principe | 2008-2009  | DHS                                                                                | National                    | both                                  | 18-59  | 18-49       | 1896     | 1961     |
| Sao Tome and Principe | 2009       | STEPS                                                                              | National                    | both                                  | 25-64  | 25-64       | 998      | 1287     |
| Saudi Arabia          | 1985-1988  | National Nutrition Survey                                                          | National                    | both                                  | 18-75  | 18-75       | 4356     | 5944     |
| Saudi Arabia          | 1987-1992  | Evaluation of the nutritional status of the people of Saudi Arabia                 | National                    | both                                  | 18-60  | 18-60       | 2318     | 3429     |
| Saudi Arabia          | 1989-1994  | National Nutrition Survey                                                          | National                    | both                                  | 18-40  | 18-40       | 2481     | 3294     |
| Saudi Arabia          | 1990-1993  | National Epidemiological Household Survey                                          | National                    | both                                  | 18-60  | 18-60       | 4882     | 4509     |
| Saudi Arabia          | 1990-1993  | Saudi National Survey                                                              | National                    | both                                  | 30-70  | 30-70       | 1612     | 1648     |
| Saudi Arabia          | 1992-1995  | Saudi Health Information Survey                                                    | National                    | both                                  | 18-50  | 18-50       | 2812     | 5223     |
| Saudi Arabia          | 1995       | National Household Survey                                                          | National                    | both                                  | 20-70  | 20-70       | 7121.212 | 7073.522 |
| Saudi Arabia          | 1995-2000  | National Epidemiological Health Survey                                             | National                    | both                                  | 30-70  | 30-70       | 8215     | 9008     |
| Saudi Arabia          | 2004-2005  | Al-Baghli et al., Saudi Med J 29(9):1319-25, 2008                                  | Subnational                 | both                                  | 30+    | 30+         | 97254    | 97254    |
| Saudi Arabia          | 2005       | STEPS                                                                              | National                    | both                                  | 18-64  | 18-64       | 2245     | 2345     |
| Saudi Arabia          | 2007       | World Health Survey                                                                | National                    | both                                  | 18+    | 18+         | 93       | 77       |
| Saudi Arabia          | 2013       | Saudi Health Interview Survey                                                      | National                    | both                                  | 18+    | 18+         | 4694     | 4948     |
| Senegal               | 1984       | Maire et al., Rev Epidemiol Sante Publique 40:252-58, 1992                         | National                    | rural                                 |        | 18-45       |          | 1628     |
| Senegal               | 1986       | Maire et al., Rev Epidemiol Sante Publique 40:252-58, 1992                         | Community                   | urban                                 |        | 18-45       |          | 616      |
| Senegal               | 1992-1993  | DHS                                                                                | National                    | both                                  |        | 18-49       |          | 2867     |
| Senegal               | 2003       | Holdsworth et al., Int J Obes Relat Metab Disord 28(12):1561-68, 2004              | Community                   | urban                                 |        | 20-49       |          | 301      |
| Senegal               | 2005       | DHS                                                                                | National                    | both                                  |        | 18-49       |          | 3451     |
| Senegal               | 2010-2011  | DHS                                                                                | National                    | both                                  | 18-59  | 18-49       | 3944     | 4705     |
| Senegal               |            | Astagneau et al., J Hypertens 10(9):1095-101, 1992                                 | Community                   | urban                                 | 18+    | 18+         | 651      | 707      |

| Country         | Data years | Survey/study name                                                                                 | Level of representativeness | Age range as used for global analysis |       | Sample size |          |          |
|-----------------|------------|---------------------------------------------------------------------------------------------------|-----------------------------|---------------------------------------|-------|-------------|----------|----------|
|                 |            |                                                                                                   |                             | Rural, urban, or both                 | Male  | Female      | Male     | Female   |
| Serbia          | 1984       | MONICA, Novi Sad                                                                                  | Community                   | urban                                 | 25-64 | 25-64       | 798      | 777      |
| Serbia          | 1988-1989  | MONICA, Novi Sad                                                                                  | Community                   | urban                                 | 25-64 | 25-64       | 778      | 791      |
| Serbia          | 1994-1995  | MONICA, Novi Sad                                                                                  | Community                   | urban                                 | 25-64 | 25-64       | 600      | 670      |
| Serbia          | 2000       | Health Status, Health Needs and Utilization of Health Care of the Population of Serbia            | National                    | both                                  | 18+   | 18+         | 4279     | 5375     |
| Serbia          | 2006       | National Health Survey                                                                            | National                    | both                                  | 18+   | 18+         | 6766     | 7445     |
| Serbia          | 2013       | National Health Survey                                                                            | National                    | both                                  | 18+   | 18+         | 6262     | 7202     |
| Serbia          | 2013-2014  | Stay Fit for Lifelong Health; The Prevalence of Lifestyle Health Conditions in Serbian Population | National                    | urban                                 | 18-65 |             | 1366     |          |
| Seychelles      | 1989       | Seychelles Heart Survey I                                                                         | National                    | both                                  | 25-64 | 25-64       | 513      | 568      |
| Seychelles      | 1994       | Seychelles Heart Survey II                                                                        | National                    | both                                  | 25-64 | 25-64       | 499      | 563      |
| Seychelles      | 2003       | School Screening Program                                                                          | National                    | both                                  | 18-19 | 18-19       | 177      | 229      |
| Seychelles      | 2004       | Seychelles Heart Survey III                                                                       | National                    | both                                  | 25-64 | 25-64       | 568      | 687      |
| Seychelles      | 2013-2014  | Seychelles Heart Survey IV                                                                        | National                    | both                                  | 25-64 | 25-64       | 531      | 698      |
| Sierra Leone    | 2008       | DHS                                                                                               | National                    | both                                  | 18-49 |             |          | 2964     |
| Sierra Leone    | 2009       | STEPS                                                                                             | National                    | both                                  | 25-64 | 25-64       | 2200     | 2318     |
| Sierra Leone    | 2013       | DHS                                                                                               | National                    | both                                  | 18-59 | 18-49       | 6127     | 6408     |
| Singapore       | 1982-1985  | Thyroid Heart Study                                                                               | National                    | both                                  | 18-91 | 18-91       | 1030     | 990      |
| Singapore       | 1992       | National Health Survey 1992                                                                       | National                    | both                                  | 18-64 | 18-64       | 1743.208 | 1704.147 |
| Singapore       | 1993-1995  | NUH Heart Study                                                                                   | National                    | both                                  | 26-89 | 26-89       | 498      | 484      |
| Singapore       | 1998       | National Health Survey 1998                                                                       | National                    | both                                  | 18-69 | 18-69       | 2283.741 | 2264.736 |
| Singapore       | 2004       | National Health Survey 2004                                                                       | National                    | both                                  | 18-74 | 18-74       | 2059.15  | 2094.5   |
| Singapore       | 2004-2007  | Combined follow up of Singapore Cardiovascular Cohort study and Singapore Prospective study       | National                    | both                                  | 24-95 | 24-95       | 2471     | 2686     |
| Singapore       | 2009       | Social Isolation, Health and Lifestyles Survey (SIHLS) 2009                                       | National                    | both                                  | 60+   | 60+         | 2038     | 2382     |
| Singapore       | 2009-2011  | The Singapore Chinese Eye Study                                                                   | Community                   | both                                  | 40+   | 40+         | 1652     | 1679     |
| Singapore       | 2012-2013  | Singapore Health Study 2012                                                                       | National                    | both                                  | 18-79 | 18-79       | 956      | 1026     |
| Slovakia        | 1993       | Countrywide Integrated Noncommunicable Diseases Intervention Programme                            | National                    | both                                  | 18-64 | 18-64       | 762      | 1217     |
| Slovakia        | 1998       | Countrywide Integrated Noncommunicable Diseases Intervention Programme                            | National                    | both                                  | 18-64 | 18-64       | 857      | 1046     |
| Slovakia        | 2003       | Countrywide Integrated Noncommunicable Diseases Intervention Programme                            | National                    | both                                  | 18-64 | 18-64       | 622      | 867      |
| Slovakia        | 2008       | Countrywide Integrated Noncommunicable Diseases Intervention Programme                            | National                    | both                                  | 18-64 | 18-64       | 391      | 561      |
| Slovakia        | 2011-2012  | European Health Examination Survey                                                                | National                    | both                                  | 18-64 | 18-64       | 884      | 1080     |
| Slovenia        | 2014       | Analysis of Children's Development in Slovenia (ACDSI), 15-19 year olds                           | National                    | urban                                 | 18-19 | 18-19       | 144      | 126      |
| Slovenia        | 2014       | the SLOFIT monitoring system                                                                      | National                    | both                                  | 18-21 | 18-21       | 6460     | 6410     |
| Solomon Islands | 2006       | STEPS                                                                                             | Subnational                 | both                                  | 18-64 | 18-64       | 990      | 1305     |
| Solomon Islands | 2009-2010  | Furusawa et al., N Z Med J 124(1333):17-28, 2011                                                  | Subnational                 | rural                                 | 18-87 | 18-87       | 153      | 215      |
| Solomon Islands | 2009-2010  | Furusawa et al., N Z Med J 124(1333):17-28, 2011                                                  | Community                   | urban                                 | 18-70 | 18-70       | 22       | 57       |
| South Africa    | 1989       | Temple et al., Ethn Dis 11(3):431-7, 2001                                                         | Community                   | both                                  | 18+   | 18+         | 457      | 614      |
| South Africa    | 1990       | Steyn et al., East Afr Med J 75(1):35-40, 1998                                                    | Community                   | urban                                 | 18-64 | 18-64       | 292      | 373      |
| South Africa    | 1996       | Temple et al., Ethn Dis 11(3):431-7, 2001                                                         | Community                   | both                                  | 18+   | 18+         | 302      | 406      |
| South Africa    | 1998       | DHS                                                                                               | National                    | both                                  | 18+   | 18+         | 4987     | 7107     |
| South Africa    | 2002       | The 1st South African National Youth Risk Behaviour Survey                                        | National                    | both                                  | 18-18 | 18-18       | 475      | 420      |
| South Africa    | 2002-2003  | SASPI                                                                                             | Community                   | rural                                 | 35+   | 35+         | 80       | 275      |
| South Africa    | 2003       | DHS                                                                                               | National                    | both                                  | 18+   | 18+         | 2825     | 4121     |
| South Africa    | 2003-2004  | Africa Centre Biomeasure Survey                                                                   | Community                   | rural                                 | 25-49 | 25-49       | 778      | 1693     |
| South Africa    | 2004-2006  | Li et al., Curationis 30(4):79-87, 2007                                                           | Community                   | both                                  | 18-40 | 18-40       | 334      | 270      |
| South Africa    | 2007-2008  | SAGE                                                                                              | National                    | both                                  | 50+   | 50+         | 1543     | 2061     |
| South Africa    | 2008       | National Income Dynamics Study Wave I                                                             | National                    | both                                  | 18+   | 18+         | 4813     | 7327     |
| South Africa    | 2008       | The 2nd South African National Youth Risk Behaviour Survey                                        | National                    | both                                  | 18-18 | 18-18       | 526      | 431      |
| South Africa    | 2008-2009  | Cape Town Bellville South Cohort Study - Baseline evaluation I                                    | Community                   | urban                                 | 18+   | 18+         | 220      | 715      |
| South Africa    | 2010       | Africa Centre Biomeasure Survey                                                                   | Community                   | rural                                 | 18+   | 18+         | 2271     | 5718     |
| South Africa    | 2010-2011  | National Income Dynamics Study Wave II                                                            | National                    | both                                  | 18+   | 18+         | 30799    | 49072    |
| South Africa    | 2012       | National Income Dynamics Study Wave III                                                           | National                    | both                                  | 18+   | 18+         | 33193    | 54314    |
| South Africa    | 2012       | South African National Health and Nutrition Examination Survey                                    | National                    | both                                  | 18+   | 18+         | 2274     | 4320     |
| South Korea     | 1986       | INTERSALT                                                                                         | Community                   | urban                                 | 20-59 | 20-59       | 100      | 98       |
| South Korea     | 1990       | Korean National Blood Pressure Survey                                                             | National                    | both                                  | 30+   | 30+         | 9734     | 12620    |
| South Korea     | 1992-1993  | Park et al., Diabetes Res Clin Pract 34 Suppl:S65-72, 1996                                        | Subnational                 | both                                  | 30-89 | 30+         | 1077     | 1392     |
| South Korea     | 1998       | Korea National Health and Nutrition Examination Survey                                            | National                    | both                                  | 18+   | 18+         | 3741     | 4482     |
| South Korea     | 2001       | Kim et al., Br J Psychiatry 185:102-7, 2004                                                       | Community                   | both                                  | 65+   | 65+         | 300      | 432      |
| South Korea     | 2001       | Korea National Health and Nutrition Examination Survey                                            | National                    | both                                  | 18+   | 18+         | 2974     | 3762     |
| South Korea     | 2005       | Korea National Health and Nutrition Examination Survey                                            | National                    | both                                  | 18+   | 18+         | 2392     | 3157     |
| South Korea     | 2007       | Korea National Health and Nutrition Examination Survey                                            | National                    | both                                  | 18+   | 18+         | 1277     | 1756     |
| South Korea     | 2008       | Korea National Health and Nutrition Examination Survey                                            | National                    | both                                  | 18+   | 18+         | 2875     | 3944     |
| South Korea     | 2009       | Korea National Health and Nutrition Examination Survey                                            | National                    | both                                  | 18+   | 18+         | 3313     | 4266     |

| Country     | Data years | Survey/study name                                                   | Level of representativeness | Age range as used for global analysis |       | Sample size |       |        |
|-------------|------------|---------------------------------------------------------------------|-----------------------------|---------------------------------------|-------|-------------|-------|--------|
|             |            |                                                                     |                             | Rural, urban, or both                 | Male  | Female      | Male  | Female |
| South Korea | 2010       | Korea National Health and Nutrition Examination Survey              | National                    | both                                  | 18+   | 18+         | 2755  | 3585   |
| South Korea | 2011       | Korea National Health and Nutrition Examination Survey              | National                    | both                                  | 18+   | 18+         | 2678  | 3561   |
| South Korea | 2012       | Korea National Health and Nutrition Examination Survey              | National                    | both                                  | 18+   | 18+         | 2530  | 3481   |
| South Korea | 2013       | Korea National Health and Nutrition Examination Survey              | National                    | both                                  | 18+   | 18+         | 2514  | 3309   |
| Spain       | 1985       | INTERSALT, Manresa                                                  | Community                   | urban                                 | 20-59 | 20-59       | 100   | 100    |
| Spain       | 1986       | INTERSALT, Torrejo                                                  | Community                   | urban                                 | 20-59 | 20-59       | 100   | 100    |
| Spain       | 1986-1988  | MONICA, Catalonia                                                   | Community                   | urban                                 | 25-64 | 25-64       | 1251  | 1271   |
| Spain       | 1989       | Cardiovascular Risk Study in Catalonia                              | Subnational                 | both                                  | 18+   | 18+         | 316   | 362    |
| Spain       | 1989-1994  | SEEDO                                                               | Subnational                 | both                                  | 25-60 | 25-60       | 2533  | 2855   |
| Spain       | 1990       | Banegas et al., Hypertension 32(6):998-1002, 1998                   | National                    | both                                  | 35-65 | 35-65       | 810   | 1203   |
| Spain       | 1990-1992  | MONICA, Catalonia                                                   | Community                   | urban                                 | 25-64 | 25-64       | 1719  | 1191   |
| Spain       | 1990-2000  | SEEDO                                                               | Subnational                 | both                                  | 25-60 | 25-60       | 4707  | 5178   |
| Spain       | 1992       | CINDI                                                               | Subnational                 | both                                  | 25-64 | 25-64       | 1194  | 1454   |
| Spain       | 1992       | ENCAT                                                               | Community                   | both                                  | 18-80 | 18-80       | 786   | 952    |
| Spain       | 1994       | HNSV                                                                | Community                   | both                                  | 18+   | 18+         | 602   | 749    |
| Spain       | 1994-1996  | MONICA, Catalonia                                                   | Community                   | urban                                 | 25-64 | 25-64       | 1800  | 1628   |
| Spain       | 1996       | Guía Study                                                          | Community                   | urban                                 | 30+   | 30+         | 305   | 384    |
| Spain       | 1996-2002  | Castells et al., J Epidemiol Community Health 60(4):316-21, 2006    | Community                   | urban                                 |       | 50-69       |       | 26963  |
| Spain       | 1999-2000  | ENIB                                                                | Community                   | both                                  | 20-60 | 20-60       | 498   | 702    |
| Spain       | 1999-2000  | Factores de riesgo en las islas Baleares: Estudio CORSAIB           | Subnational                 | both                                  | 35-75 | 35-75       | 811   | 864    |
| Spain       | 2000-2001  | Regidor et al., J Hum Hypertens 20(1):73-82, 2006                   | National                    | both                                  | 60+   | 60+         | 1318  | 2281   |
| Spain       | 2000-2001  | EUREYE Study                                                        | Subnational                 | both                                  | 65+   | 65+         | 274   | 324    |
| Spain       | 2000-2005  | CDC of the Canary Islands                                           | Community                   | both                                  | 18-75 | 18-75       | 2883  | 3770   |
| Spain       | 2001-2002  | Catalan Health Interview Survey                                     | Subnational                 | both                                  | 18-74 | 18-74       | 597   | 745    |
| Spain       | 2002-2003  | ENCAT                                                               | Community                   | both                                  | 18-80 | 18-80       | 712   | 813    |
| Spain       | 2003       | The European Male Ageing Study                                      | Community                   | both                                  | 40+   |             | 405   |        |
| Spain       | 2003-2005  | Registre Gironi del Cor                                             | Subnational                 | both                                  | 35-79 | 35-79       | 2951  | 3266   |
| Spain       | 2004       | Vioque J et al. Obesity 2008; 16: 664-670                           | Community                   | urban                                 | 24+   | 24+         | 87    | 115    |
| Spain       | 2004       | Cardiovascular Risk Study in Castilla y León                        | Subnational                 | both                                  | 18+   | 18+         | 1842  | 2019   |
| Spain       | 2004-2006  | PREVICTUS                                                           | National                    | both                                  | 60+   | 60+         | 3193  | 3640   |
| Spain       | 2007-2009  | Harmonizing Equation of Risk in Mediterranean countries Extremadura | Subnational                 | both                                  | 25-79 | 25-79       | 1298  | 1498   |
| Spain       | 2008       | The European Male Ageing Study                                      | Community                   | both                                  | 40+   |             | 272   |        |
| Spain       | 2008-2010  | Study on Nutrition and Cardiovascular Risk in Spain                 | National                    | both                                  | 18+   | 18+         | 5756  | 6397   |
| Spain       |            | Soriguer et al., Eur J Epidemiol 19(1):33-40, 2004                  | Community                   | rural                                 | 18-65 | 18-65       | 613   | 613    |
| Sri Lanka   | 2003       | Wijewardene et al., Ceylon Med J 50:62-70, 2005                     | Subnational                 | both                                  | 30-65 | 30-65       | 275   | 296    |
| Sri Lanka   | 2003       | Wijewardene et al., Ceylon Med J 50:62-70, 2005                     | Subnational                 | both                                  | 30-65 | 30-65       | 139   | 192    |
| Sri Lanka   | 2003       | Wijewardene et al., Ceylon Med J 50:62-70, 2005                     | Subnational                 | both                                  | 30-65 | 30-65       | 1891  | 2410   |
| Sri Lanka   | 2003       | Wijewardene et al., Ceylon Med J 50:62-70, 2005                     | Subnational                 | both                                  | 30-65 | 30-65       | 387   | 457    |
| Sri Lanka   | 2006       | STEPS                                                               | National                    | both                                  | 18-64 | 18-64       | 5682  | 5920   |
| Sri Lanka   | 2006-2007  | DHS                                                                 | National                    | both                                  | 18-49 | 18-49       |       | 12539  |
| Sudan       | 2005       | STEPS                                                               | National                    | both                                  | 25-64 | 25-64       | 626   | 881    |
| Swaziland   | 2006-2007  | DHS                                                                 | National                    | both                                  | 18-49 | 18-49       | 3252  | 3970   |
| Sweden      | 1972*      | The Swedish Conscription Study                                      | National                    | both                                  | 18-19 |             | 47452 |        |
| Sweden      | 1973*      | The Swedish Conscription Study                                      | National                    | both                                  | 18-19 |             | 49837 |        |
| Sweden      | 1974*      | The Swedish Conscription Study                                      | National                    | both                                  | 18-19 |             | 44124 |        |
| Sweden      | 1975       | The Swedish Conscription Study                                      | National                    | both                                  | 18-19 |             | 39347 |        |
| Sweden      | 1976       | The Swedish Conscription Study                                      | National                    | both                                  | 18-19 |             | 35965 |        |
| Sweden      | 1977       | The Swedish Conscription Study                                      | National                    | both                                  | 18-19 |             | 33234 |        |
| Sweden      | 1978       | The Swedish Conscription Study                                      | National                    | both                                  | 18-19 |             | 12356 |        |
| Sweden      | 1979       | The Swedish Conscription Study                                      | National                    | both                                  | 18-19 |             | 20636 |        |
| Sweden      | 1980       | The Swedish Conscription Study                                      | National                    | both                                  | 18-19 |             | 31886 |        |
| Sweden      | 1980-1984  | Uppsala Longitudinal Study of Adult Men                             | Community                   | both                                  | 60    |             | 1841  |        |
| Sweden      | 1981       | The Swedish Conscription Study                                      | National                    | both                                  | 18-19 |             | 32417 |        |
| Sweden      | 1982       | The Swedish Conscription Study                                      | National                    | both                                  | 18-19 |             | 32166 |        |
| Sweden      | 1983       | The Swedish Conscription Study                                      | National                    | both                                  | 18-19 |             | 32130 |        |
| Sweden      | 1984       | The Swedish Conscription Study                                      | National                    | both                                  | 18-19 |             | 20326 |        |
| Sweden      | 1985       | MONICA Gothenburg                                                   | Community                   | urban                                 | 25-64 | 25-64       | 666   | 702    |
| Sweden      | 1985       | The Swedish Conscription Study                                      | National                    | both                                  | 18-19 |             | 10362 |        |
| Sweden      | 1985-1989  | Västerbotten Intervention Project                                   | Subnational                 | both                                  | 25-64 | 25-64       | 1676  | 1554   |
| Sweden      | 1985-1996  | EPIC Umea                                                           | Subnational                 | both                                  | 24-72 | 24-72       | 12359 | 13217  |
| Sweden      | 1986       | MONICA, Northern Sweden                                             | Subnational                 | urban                                 | 25-64 | 25-64       | 819   | 795    |

| Country     | Data years | Survey/study name                                                       | Level of representativeness | Age range as used for global analysis |       | Sample size |       |        |
|-------------|------------|-------------------------------------------------------------------------|-----------------------------|---------------------------------------|-------|-------------|-------|--------|
|             |            |                                                                         |                             | Rural, urban, or both                 | Male  | Female      | Male  | Female |
| Sweden      | 1986       | The Swedish Conscript Study                                             | National                    | both                                  | 18-19 |             | 34680 |        |
| Sweden      | 1987       | The Swedish Conscript Study                                             | National                    | both                                  | 18-19 |             | 39485 |        |
| Sweden      | 1988       | The Swedish Conscript Study                                             | National                    | both                                  | 18-19 |             | 35942 |        |
| Sweden      | 1989       | The Swedish Conscript Study                                             | National                    | both                                  | 18-19 |             | 38408 |        |
| Sweden      | 1990       | MONICA, Northern Sweden                                                 | Subnational                 | urban                                 | 25-64 | 25-64       | 761   | 793    |
| Sweden      | 1990       | MONICA Gothenburg                                                       | Community                   | urban                                 | 25-64 | 25-64       | 775   | 775    |
| Sweden      | 1990       | The Swedish Conscript Study                                             | National                    | both                                  | 18-19 |             | 39863 |        |
| Sweden      | 1990-1992  | Västerbotten Intervention Project                                       | Subnational                 | both                                  | 25-64 | 25-64       | 7263  | 7804   |
| Sweden      | 1991       | The Swedish Conscript Study                                             | National                    | both                                  | 18-19 |             | 40433 |        |
| Sweden      | 1991-1995  | Uppsala Longitudinal Study of Adult Men                                 | Community                   | both                                  | 70    |             | 1215  |        |
| Sweden      | 1991-1996  | Malmö Diet and Cancer                                                   | Community                   | urban                                 | 45-73 | 45-73       | 12096 | 18293  |
| Sweden      | 1992       | The Swedish Conscript Study                                             | National                    | both                                  | 18-19 |             | 38470 |        |
| Sweden      | 1993       | The Swedish Conscript Study                                             | National                    | both                                  | 18-19 |             | 36756 |        |
| Sweden      | 1993-1995  | Västerbotten Intervention Project                                       | Subnational                 | both                                  | 25-64 | 25-64       | 9804  | 10727  |
| Sweden      | 1994       | Helicobacter Pylori                                                     | Community                   | urban                                 | 56-65 | 56-65       | 170   | 217    |
| Sweden      | 1994       | MONICA, Northern Sweden                                                 | Subnational                 | urban                                 | 25-64 | 25-64       | 736   | 761    |
| Sweden      | 1994       | The Swedish Conscript Study                                             | National                    | both                                  | 18-19 |             | 34653 |        |
| Sweden      | 1994-1996  | Kungsholmen Project                                                     | Community                   | urban                                 | 75+   | 75+         | 160   | 160    |
| Sweden      | 1995       | MONICA Gothenburg                                                       | Community                   | urban                                 | 25-64 | 25-64       | 745   | 867    |
| Sweden      | 1995       | The Swedish Conscript Study                                             | National                    | both                                  | 18-19 |             | 33711 |        |
| Sweden      | 1996       | The Swedish Conscript Study                                             | National                    | both                                  | 18-19 |             | 31145 |        |
| Sweden      | 1996-1998  | Västerbotten Intervention Project                                       | Subnational                 | both                                  | 25-64 | 25-64       | 8327  | 8893   |
| Sweden      | 1997       | The Swedish Conscript Study                                             | National                    | both                                  | 18-19 |             | 29332 |        |
| Sweden      | 1997-2001  | Uppsala Longitudinal Study of Adult Men                                 | Community                   | both                                  | 77    |             | 783   |        |
| Sweden      | 1998       | The Swedish Conscript Study                                             | National                    | both                                  | 18-19 |             | 35718 |        |
| Sweden      | 1998-2001  | The Kalixanda study                                                     | Community                   | both                                  | 20+   | 20+         | 508   | 483    |
| Sweden      | 1999       | MONICA Northern Sweden                                                  | Subnational                 | both                                  | 25-74 | 25-74       | 889   | 930    |
| Sweden      | 1999       | The Swedish Conscript Study                                             | National                    | both                                  | 18-19 |             | 31841 |        |
| Sweden      | 1999-2003  | Västerbotten Intervention Project                                       | Subnational                 | both                                  | 25-64 | 25-64       | 6354  | 6384   |
| Sweden      | 2000       | The Swedish Conscript Study                                             | National                    | both                                  | 18-19 |             | 25534 |        |
| Sweden      | 2000-2001  | H70 Study                                                               | Community                   | urban                                 | 70    | 70          | 242   | 270    |
| Sweden      | 2001       | The Swedish Conscript Study                                             | National                    | both                                  | 18-19 |             | 25241 |        |
| Sweden      | 2001-2003  | Uppsala Longitudinal Study of Adult Men                                 | Community                   | both                                  | 82    |             | 511   |        |
| Sweden      | 2001-2004  | Swedish INTERGENE Cohort Study                                          | Subnational                 | both                                  | 24-76 | 24-76       | 1694  | 1906   |
| Sweden      | 2001-2004  | Prospective Investigation of the Vasculature in Uppsala Seniors (PIVUS) | Community                   | both                                  | 70    | 70          | 507   | 509    |
| Sweden      | 2002       | The Swedish Conscript Study                                             | National                    | both                                  | 18-19 |             | 21219 |        |
| Sweden      | 2003       | The European Male Ageing Study                                          | Community                   | both                                  | 40+   |             | 396   |        |
| Sweden      | 2003       | The Swedish Conscript Study                                             | National                    | both                                  | 18-19 |             | 26570 |        |
| Sweden      | 2003-2004  | Welin et al., BMC Public Health 8:403, 2008                             | Community                   | urban                                 | 50    | 50          | 595   | 655    |
| Sweden      | 2003-2004  | Welin et al., BMC Public Health 8:403, 2008                             | Community                   | urban                                 | 60    |             | 667   |        |
| Sweden      | 2004       | MONICA Northern Sweden                                                  | Subnational                 | both                                  | 25-74 | 25-74       | 908   | 958    |
| Sweden      | 2004       | The Swedish Conscript Study                                             | National                    | both                                  | 18-19 |             | 24904 |        |
| Sweden      | 2004-2005  | Population Study of Women in Gothenburg                                 | Community                   | urban                                 |       | 38-50       |       | 494    |
| Sweden      | 2005-2006  | H70 Study                                                               | Community                   | urban                                 | 75    | 75          | 320   | 422    |
| Sweden      | 2006-2009  | Prospective Investigation of the Vasculature in Uppsala Seniors (PIVUS) | Community                   | both                                  | 75    | 75          | 407   | 419    |
| Sweden      | 2008       | The European Male Ageing Study                                          | Community                   | both                                  | 40+   |             | 353   |        |
| Sweden      | 2009       | MONICA Northern Sweden                                                  | Subnational                 | both                                  | 25-74 | 25-74       | 849   | 861    |
| Sweden      | 2014       | MONICA Northern Sweden                                                  | Subnational                 | both                                  | 25-74 | 25-74       | 753   | 801    |
| Switzerland | 1984-1986  | The Swiss MONICA Study Wave I                                           | Subnational                 | both                                  | 25-74 | 25-74       | 1744  | 1689   |
| Switzerland | 1988-1989  | The Swiss MONICA Study Wave II                                          | Subnational                 | both                                  | 25-74 | 25-74       | 1778  | 1684   |
| Switzerland | 1992-1993  | The Swiss MONICA Study Wave III                                         | Subnational                 | both                                  | 25-74 | 25-74       | 1577  | 1672   |
| Switzerland | 2003-2006  | Cohorte Lausannoise                                                     | Community                   | urban                                 | 35-75 | 35-75       | 3186  | 3536   |
| Switzerland | 2004       | Body Mass Index of Swiss conscripts                                     | National                    | both                                  | 18-20 |             | 20491 |        |
| Switzerland | 2005       | Body Mass Index of Swiss conscripts                                     | National                    | both                                  | 18-21 |             | 32131 |        |
| Switzerland | 2006       | Body Mass Index of Swiss conscripts                                     | National                    | both                                  | 18-22 |             | 34530 |        |
| Switzerland | 2007       | Body Mass Index of Swiss conscripts                                     | National                    | both                                  | 18-23 |             | 36194 |        |
| Switzerland | 2007-2012  | Bus Santé Study                                                         | Subnational                 | both                                  | 20-80 | 20-80       | 1884  | 1911   |
| Switzerland | 2008       | Body Mass Index of Swiss conscripts                                     | National                    | both                                  | 18-24 |             | 34497 |        |
| Switzerland | 2009       | Body Mass Index of Swiss conscripts                                     | National                    | both                                  | 18-25 |             | 34896 |        |
| Switzerland | 2009-2012  | Cohorte Lausannoise                                                     | Community                   | urban                                 | 40-81 | 40-81       | 2176  | 2494   |
| Switzerland | 2010       | Body Mass Index of Swiss conscripts                                     | National                    | both                                  | 18-26 |             | 37214 |        |

| Country              | Data years | Survey/study name                                                                    | Level of representativeness | Age range as used for global analysis |       | Sample size |       |        |
|----------------------|------------|--------------------------------------------------------------------------------------|-----------------------------|---------------------------------------|-------|-------------|-------|--------|
|                      |            |                                                                                      |                             | Rural, urban, or both                 | Male  | Female      | Male  | Female |
| Switzerland          | 2011       | Body Mass Index of Swiss conscripts                                                  | National                    | both                                  | 18-27 |             | 38108 |        |
| Switzerland          | 2012       | Body Mass Index of Swiss conscripts                                                  | National                    | both                                  | 18-28 |             | 36938 |        |
| Syrian Arab Republic | 2002       | National Survey on non-communicable diseases and factors affecting their development | National                    | both                                  | 18-64 | 18-64       | 3155  | 4045   |
| Taiwan               | 1985       | INTERSALT                                                                            | Community                   | rural                                 | 20-59 | 20-59       | 89    | 92     |
| Taiwan               | 1989-1991  | Chiu et al., J Gerontol A Biol Sci Med Sci 55(11):M684-90, 2000                      | Subnational                 | both                                  | 65+   | 65+         | 1322  | 1308   |
| Taiwan               | 1993-1994  | The Kinmen Neurological Disorders Survey                                             | Community                   | urban                                 | 50+   | 50+         | 672   | 593    |
| Taiwan               | 1993-1996  | Nutrition and Health Survey in Taiwan 1993-1996                                      | National                    | both                                  | 18+   | 18+         | 1506  | 1704   |
| Taiwan               | 1999-2000  | Nutrition and Health Survey in Taiwan 1999-2000                                      | National                    | both                                  | 65+   | 65+         | 1271  | 1202   |
| Taiwan               | 2002       | Taiwanese Survey on Hypertension, Hyperglycemia and Hyperlipidemia                   | National                    | both                                  | 18+   | 18+         | 3293  | 3313   |
| Taiwan               | 2004-2005  | TCHS                                                                                 | Community                   | urban                                 | 40+   | 40+         | 1147  | 1212   |
| Taiwan               | 2005-2008  | Nutrition and Health Survey in Taiwan 2005-2008                                      | National                    | both                                  | 19+   | 19+         | 1311  | 1355   |
| Taiwan               | 2007       | Taiwanese Survey on Hypertension, Hyperglycemia and Hyperlipidemia                   | National                    | both                                  | 20+   | 20+         | 2155  | 2469   |
| Tajikistan           | 2003       | Micronutrient Status Survey                                                          | National                    | both                                  |       | 18-49       |       | 1806   |
| Tajikistan           | 2012       | DHS                                                                                  | National                    | both                                  |       | 18-49       |       | 7724   |
| Tanzania             | 1991-1992  | DHS                                                                                  | National                    | both                                  |       | 18-49       |       | 4405   |
| Tanzania             | 1996       | DHS                                                                                  | National                    | both                                  |       | 18-49       |       | 3766   |
| Tanzania             | 1996-1997  | Aspray et al., Trans R Soc Trop Med Hyg 94:637-44, 2000                              | Community                   | rural                                 | 18+   | 18+         | 251   | 324    |
| Tanzania             | 1996-1997  | Aspray et al., Trans R Soc Trop Med Hyg 94:637-44, 2000                              | Community                   | urban                                 | 18+   | 18+         | 117   | 118    |
| Tanzania             | 1998-1999  | Bovet et al., Int J Epidemiol 31(1):240-7, 2002                                      | Community                   | urban                                 | 25-64 | 25-64       | 3593  | 5646   |
| Tanzania             | 2004-2005  | DHS                                                                                  | National                    | both                                  |       | 18-49       |       | 7854   |
| Tanzania             | 2010       | DHS                                                                                  | National                    | both                                  |       | 18-49       |       | 7746   |
| Tanzania             | 2011       | STEPS                                                                                | Subnational                 | both                                  | 25-64 | 25-64       | 1008  | 1517   |
| Tanzania             | 2012       | STEPS                                                                                | National                    | both                                  | 25-64 | 25-64       | 2581  | 2820   |
| Tanzania             | 2014       | Dar es Salaam Urban Cohort Hypertension Study                                        | Community                   | urban                                 | 40+   | 40+         | 965   | 1266   |
| Thailand             | 1987       | INCLEN                                                                               | Community                   | rural                                 | 35-65 |             | 244   |        |
| Thailand             | 1989       | INCLEN                                                                               | Community                   | rural                                 | 35-65 |             | 209   |        |
| Thailand             | 1989       | INCLEN                                                                               | Community                   | urban                                 | 35-65 |             | 207   |        |
| Thailand             | 1991       | Thailand National Health Examination Survey I                                        | National                    | both                                  | 18+   | 18+         | 5771  | 8140   |
| Thailand             | 1995       | The Fourth National Nutrition Survey of Thailand- 1995                               | National                    | both                                  | 20-60 | 20-60       | 1405  | 3631   |
| Thailand             | 1997       | Thailand National Health Examination Survey II                                       | National                    | both                                  | 18-59 | 18-59       | 1183  | 2023   |
| Thailand             | 2000       | InterASIA                                                                            | National                    | both                                  | 35+   | 35+         | 2092  | 3211   |
| Thailand             | 2003-2004  | The Fifth National Nutrition Survey of Thailand                                      | National                    | both                                  | 19+   | 19+         | 1961  | 3366   |
| Thailand             | 2004       | Thailand National Health Examination Survey III                                      | National                    | both                                  | 18+   | 18+         | 18442 | 19856  |
| Thailand             | 2009       | Thailand National Health Examination Survey IV                                       | National                    | both                                  | 18-98 | 18-98       | 9262  | 10164  |
| Timor-Leste          | 2009-2010  | DHS                                                                                  | National                    | both                                  |       | 18-49       |       | 10009  |
| Timor-Leste          | 2009-2010  | Timor-Leste Eye Health Survey                                                        | Subnational                 | both                                  | 40+   | 40+         | 245   | 247    |
| Togo                 | 1998       | DHS                                                                                  | National                    | both                                  |       | 18-49       |       | 3277   |
| Togo                 | 2010       | STEPS                                                                                | National                    | both                                  | 18-64 | 18-64       | 1897  | 1961   |
| Togo                 | 2013-2014  | DHS                                                                                  | National                    | both                                  |       | 18-49       |       | 3877   |
| Tokelau              | 2005       | STEPS                                                                                | National                    | both                                  | 18-64 | 18-64       | 241   | 267    |
| Tokelau              | 2014       | Global School-based Student Health Survey                                            | National                    | both                                  | 18-19 |             |       | 2      |
| Tonga                | 2004       | STEPS                                                                                | National                    | both                                  | 18-64 | 18-64       | 390   | 546    |
| Tonga                | 2005-2007  | Pacific Obesity Prevention in Communities - Ma'alaha Youth Project                   | Subnational                 | both                                  | 18-19 | 18-19       | 105   | 137    |
| Tonga                | 2007-2008  | Pacific Obesity Prevention in Communities - Ma'alaha Youth Project                   | Subnational                 | both                                  | 18-22 | 18-22       | 144   | 218    |
| Tonga                | 2011       | STEPS                                                                                | National                    | both                                  | 18-64 | 18-64       | 878   | 1401   |
| Trinidad and Tobago  | 1985       | INTERSALT                                                                            | Community                   | urban                                 | 20-59 | 20-59       | 84    | 92     |
| Trinidad and Tobago  | 2001       | Adult Survey                                                                         | National                    | both                                  | 25+   | 25+         | 198   | 267    |
| Tunisia              | 1996-1997  | Arian Healthy Project 1997                                                           | Community                   | both                                  | 35-65 | 35-65       | 2664  | 2711   |
| Tunisia              | 1996-1997  | Tunisian National Nutrition Survey 1996-1997                                         | National                    | both                                  | 18+   | 18+         | 1397  | 2674   |
| Tunisia              | 2005       | Aounallah et al., Public Health 12(1):98, 2012                                       | National                    | both                                  | 18-19 | 18-19       | 451   | 583    |
| Tunisia              | 2005       | Tunisian National Survey                                                             | National                    | both                                  | 35-71 | 35-71       | 3417  | 4590   |
| Tunisia              | 2009-2010  | ObeMaghreb                                                                           | Subnational                 | urban                                 | 18-49 | 18-49       | 998   | 696    |
| Turkey               | 1990       | Turkish Adult Risk Factor Study                                                      | National                    | both                                  | 20+   | 20+         | 1338  | 1369   |
| Turkey               | 1993       | DHS                                                                                  | National                    | both                                  |       | 18-49       |       | 2396   |
| Turkey               | 1998       | DHS                                                                                  | National                    | both                                  |       | 18-49       |       | 2305   |
| Turkey               | 1998       | Turkish Adult Risk Factor Study                                                      | National                    | both                                  | 28+   | 28+         | 877   | 909    |
| Turkey               | 1998-1999  | Erem et al., Diabetes Res Clin Pract 54(3):203-08, 2001                              | Community                   | urban                                 | 20+   | 20+         | 1324  | 1322   |
| Turkey               | 2000       | MDHS                                                                                 | Subnational                 | urban                                 |       | 18-49       |       | 1420   |
| Turkey               | 2000       | Turkish Adult Risk Factor Study                                                      | National                    | both                                  | 30+   | 30+         | 890   | 938    |
| Turkey               | 2000-2002  | The Healthy Nutrition for Healthy Heart Study                                        | National                    | both                                  | 25-84 | 25-84       | 4718  | 10631  |
| Turkey               | 2001       | Yumuk et al., Diabetes Res Clin Pract 70(2):151-58, 2005                             | Community                   | urban                                 | 20+   | 20+         | 1042  | 1789   |

| Country              | Data years | Survey/study name                                                                                              | Level of representativeness | Age range as used for global analysis |       | Sample size |         |         |
|----------------------|------------|----------------------------------------------------------------------------------------------------------------|-----------------------------|---------------------------------------|-------|-------------|---------|---------|
|                      |            |                                                                                                                |                             | Rural, urban, or both                 | Male  | Female      | Male    | Female  |
| Turkey               | 2001-2002  | Turkish Adult Risk Factor Study                                                                                | National                    | both                                  | 32+   | 32+         | 1098    | 1210    |
| Turkey               | 2002       | Onal et al., Blood Press 13(1):31-6, 2004                                                                      | Subnational                 | urban                                 | 25+   | 25+         | 67      | 355     |
| Turkey               | 2003       | DHS                                                                                                            | National                    | both                                  |       | 18-49       |         | 3014    |
| Turkey               | 2003       | Prevalence, awareness, treatment and control of hypertension in Turkey in 2003                                 | National                    | both                                  | 18+   | 18+         | 1988    | 2847    |
| Turkey               | 2003-2004  | Turkish Adult Risk Factor Study                                                                                | National                    | both                                  | 34+   | 34+         | 479     | 987     |
| Turkey               | 2004       | Nationally Representative Cross-sectional Survey                                                               | National                    | both                                  | 20+   | 20+         | 2110    | 2154    |
| Turkey               | 2005-2006  | Turkish Adult Risk Factor Study                                                                                | National                    | both                                  | 33+   | 33+         | 1029    | 1088    |
| Turkey               | 2007       | Natinal Household survey                                                                                       | National                    | both                                  | 20-85 | 20-85       | 2263    | 1842    |
| Turkey               | 2007-2008  | Turkish Adult Risk Factor Study                                                                                | National                    | both                                  | 35+   | 35+         | 1101    | 1133    |
| Turkey               | 2009-2010  | Turkish Adult Risk Factor Study                                                                                | National                    | both                                  | 37+   | 37+         | 466     | 507     |
| Turkey               | 2009-2012  | Prevalence of diabetes and associated risk factors among adult population in Trabzon city                      | Subnational                 | both                                  | 20+   | 20+         | 1583    | 2138    |
| Turkey               | 2011       | Chronic Disease Risk Factor Survey                                                                             | National                    | both                                  | 18+   | 18+         | 7434.65 | 8317.07 |
| Turkey               | 2012-2013  | Turkish Adult Risk Factor Study                                                                                | National                    | both                                  | 37+   | 37+         | 1012    | 1087    |
| Turkmenistan         | 2000       | DHS                                                                                                            | National                    | both                                  |       | 18-49       |         | 2084    |
| Turkmenistan         | 2013       | STEPS                                                                                                          | National                    | both                                  | 18-64 | 18-64       | 1929    | 2858    |
| Tuvalu               | 1976       | The Funafuti Survey                                                                                            | Subnational                 | both                                  | 18+   | 18+         | 280     | 289     |
| Uganda               | 1995       | DHS                                                                                                            | National                    | both                                  |       | 18-49       |         | 3117    |
| Uganda               | 2000-2001  | DHS                                                                                                            | National                    | both                                  |       | 18-49       |         | 4984    |
| Uganda               | 2006       | DHS                                                                                                            | National                    | both                                  | 18-54 | 18-49       | 2092    | 2140    |
| Uganda               | 2011       | DHS                                                                                                            | National                    | both                                  | 18-54 | 18-49       | 1988    | 2120    |
| Uganda               | 2011-2012  | The Prevalence and Distribution of Non-communicable Diseases and Their Risk Factors in Kasese District, Uganda | Subnational                 | both                                  | 25-79 | 25-79       | 277     | 221     |
| Ukraine              | 2002       | National Micronutrient Survey                                                                                  | National                    | both                                  |       | 18-50       |         | 816     |
| United Arab Emirates | 1989-1990  | el Mugamer et al., J Trop Med Hyg 98(6):407-15, 1995                                                           | Community                   | both                                  | 20+   | 20+         | 123     | 199     |
| United Arab Emirates | 1999-2000  | Emirates National Diabetes and Coronary Artery Disease Risk Factor Study                                       | National                    | both                                  | 20-80 | 20-80       | 2822    | 3743    |
| United Arab Emirates | 2000-2001  | carter et al., J Health Popul Nutr 22(1):75-83, 2004                                                           | Community                   | both                                  |       | 20-79       |         | 521     |
| United Kingdom       | 1982       | MRC National Survey of Health and Development                                                                  | National                    | both                                  | 36    | 36          | 1632    | 1648    |
| United Kingdom       | 1983-1984  | MONICA, Belfast                                                                                                | Subnational                 | both                                  | 25-64 | 25-64       | 1158    | 1183    |
| United Kingdom       | 1984-1986  | Scottish Heart Health Survey                                                                                   | Subnational                 | both                                  | 40-59 | 40-59       | 4364    | 4464    |
| United Kingdom       | 1985       | INTERSALT, Birmingham                                                                                          | Community                   | urban                                 | 20-59 | 20-59       | 100     | 100     |
| United Kingdom       | 1985       | INTERSALT, Wales                                                                                               | Community                   | urban                                 | 20-59 | 20-59       | 100     | 99      |
| United Kingdom       | 1985-1986  | INTERSALT, Belfast                                                                                             | Community                   | urban                                 | 20-59 | 20-59       | 99      | 100     |
| United Kingdom       | 1986-1987  | Dietary and Nutritional Survey of British Adults 1986-1987                                                     | National                    | both                                  | 18-64 | 18-64       | 1100    | 1125    |
| United Kingdom       | 1986-1987  | MONICA, Belfast                                                                                                | Subnational                 | both                                  | 25-64 | 25-64       | 1155    | 1185    |
| United Kingdom       | 1987-1988  | Edinburgh Artery Study                                                                                         | Community                   | urban                                 | 54-75 | 54-75       | 808     | 783     |
| United Kingdom       | 1989       | MRC National Survey of Health and Development                                                                  | National                    | both                                  | 43    | 43          | 1617    | 1608    |
| United Kingdom       | 1991       | National Child Development Study (1958 British Cohort Study)                                                   | National                    | both                                  | 33    | 33          | 5426    | 5606    |
| United Kingdom       | 1991-1992  | Health Survey for England                                                                                      | National                    | both                                  | 18+   | 18+         | 3004    | 3331    |
| United Kingdom       | 1991-1992  | MONICA, Belfast                                                                                                | Subnational                 | both                                  | 25-64 | 25-64       | 998     | 996     |
| United Kingdom       | 1992       | MONICA, Glasgow                                                                                                | Community                   | urban                                 | 25-64 | 25-64       | 696     | 775     |
| United Kingdom       | 1992-1993  | Whickham Survey                                                                                                | Community                   | urban                                 | 35+   | 35+         | 676     | 784     |
| United Kingdom       | 1992-1994  | Edinburgh Artery Study                                                                                         | Community                   | urban                                 | 60-81 | 60-81       | 580     | 582     |
| United Kingdom       | 1993       | Health Survey for England                                                                                      | National                    | both                                  | 18+   | 18+         | 7225    | 8060    |
| United Kingdom       | 1993-1997  | EPIC Norfolk                                                                                                   | Subnational                 | both                                  | 40-79 | 40-79       | 11574   | 13995   |
| United Kingdom       | 1993-2000  | EPIC Oxford                                                                                                    | Subnational                 | both                                  | 20-98 | 20-98       | 10851   | 37605   |
| United Kingdom       | 1994       | Health Survey for England                                                                                      | National                    | both                                  | 18+   | 18+         | 6628    | 7725    |
| United Kingdom       | 1994-1995  | National Diet and Nutrition Survey 1994-1995                                                                   | National                    | both                                  | 65+   | 65+         | 701     | 687     |
| United Kingdom       | 1995       | Health Survey for England                                                                                      | National                    | both                                  | 18+   | 18+         | 6525    | 7483    |
| United Kingdom       | 1995       | MONICA, Glasgow                                                                                                | Community                   | urban                                 | 25-64 | 25-64       | 855     | 958     |
| United Kingdom       | 1995       | Scottish Healthy Survey 1995                                                                                   | Subnational                 | both                                  | 18-64 | 18-64       | 3208    | 3903    |
| United Kingdom       | 1996       | Health Survey for England                                                                                      | National                    | both                                  | 18+   | 18+         | 6751    | 7793    |
| United Kingdom       | 1997       | Health Survey for England                                                                                      | National                    | both                                  | 18+   | 18+         | 3583    | 4109    |
| United Kingdom       | 1997       | National Diet and Nutrition Survey 1997                                                                        | National                    | both                                  | 18-18 | 18-18       | 49      | 53      |
| United Kingdom       | 1997-1999  | International collaborative study of macronutrients, micronutrients and blood pressure                         | Community                   | urban                                 | 40-59 | 40-59       | 141     | 138     |
| United Kingdom       | 1998       | Health Survey for England                                                                                      | National                    | both                                  | 18+   | 18+         | 6382    | 7497    |
| United Kingdom       | 1998       | Scottish Healthy Survey 1998                                                                                   | Subnational                 | both                                  | 18-74 | 18-74       | 3506    | 4444    |
| United Kingdom       | 1998-1999  | International collaborative study of macronutrients, micronutrients and blood pressure                         | Community                   | urban                                 | 40-59 | 40-59       | 125     | 97      |
| United Kingdom       | 1998-2000  | The British Regional Heart Study                                                                               | National                    | urban                                 | 60-79 |             | 4138    |         |
| United Kingdom       | 1999       | Health Survey for England                                                                                      | National                    | both                                  | 18+   | 18+         | 3104    | 3574    |
| United Kingdom       | 1999       | MRC National Survey of Health and Development                                                                  | National                    | both                                  | 53    | 53          | 1452    | 1496    |
| United Kingdom       | 1999-2001  | British Women's Heart and Health Study                                                                         | National                    | both                                  |       | 60-79       |         | 3678    |
| United Kingdom       | 1999-2001  | Edinburgh Artery Study                                                                                         | Community                   | urban                                 | 66-87 | 66-87       | 373     | 404     |



| Country                  | Data years | Survey/study name                                                                      | Level of representativeness | Age range as used for global analysis |       | Sample size |      |        |
|--------------------------|------------|----------------------------------------------------------------------------------------|-----------------------------|---------------------------------------|-------|-------------|------|--------|
|                          |            |                                                                                        |                             | Rural, urban, or both                 | Male  | Female      | Male | Female |
| United Kingdom           | 1999-2004  | Hertfordshire Cohort Study                                                             | Subnational                 | both                                  | 59-73 | 59-73       | 1571 | 1416   |
| United Kingdom           | 2000       | Health Survey for England                                                              | National                    | both                                  | 18+   | 18+         | 3254 | 3830   |
| United Kingdom           | 2000-2001  | National Diet and Nutrition Survey 2000-2001                                           | National                    | both                                  | 19-64 | 19-64       | 807  | 973    |
| United Kingdom           | 2001       | Health Survey for England                                                              | National                    | both                                  | 18+   | 18+         | 6073 | 7197   |
| United Kingdom           | 2002       | Health Survey for England                                                              | National                    | both                                  | 18+   | 18+         | 3703 | 4507   |
| United Kingdom           | 2003       | The European Male Ageing Study                                                         | Community                   | both                                  | 40+   |             | 394  |        |
| United Kingdom           | 2003       | Health Survey for England                                                              | National                    | both                                  | 18+   | 18+         | 5787 | 6856   |
| United Kingdom           | 2003       | Scottish Healthy Survey 2003                                                           | Subnational                 | both                                  | 18+   | 18+         | 2922 | 3583   |
| United Kingdom           | 2004       | Health Survey for England                                                              | National                    | both                                  | 18+   | 18+         | 2365 | 3050   |
| United Kingdom           | 2004-2005  | English Longitudinal Study of Ageing Wave 2 2004-2005                                  | National                    | both                                  | 52+   | 52+         | 3259 | 3966   |
| United Kingdom           | 2005       | Health Survey for England                                                              | National                    | both                                  | 18+   | 18+         | 3768 | 4422   |
| United Kingdom           | 2006       | Health Survey for England                                                              | National                    | both                                  | 18+   | 18+         | 5359 | 6298   |
| United Kingdom           | 2006-2011  | MRC National Survey of Health and Development                                          | National                    | both                                  | 60-64 | 60-64       | 1061 | 1157   |
| United Kingdom           | 2007       | Health Survey for England                                                              | National                    | both                                  | 18+   | 18+         | 2633 | 3122   |
| United Kingdom           | 2008       | The European Male Ageing Study                                                         | Community                   | both                                  | 40+   |             | 301  |        |
| United Kingdom           | 2008       | Health Survey for England                                                              | National                    | both                                  | 18+   | 18+         | 5660 | 6767   |
| United Kingdom           | 2008       | Scottish Healthy Survey 2008                                                           | Subnational                 | both                                  | 18+   | 18+         | 2392 | 2950   |
| United Kingdom           | 2008-2009  | English Longitudinal Study of Ageing Wave 4 2008-2009                                  | National                    | both                                  | 50+   | 50+         | 3540 | 4296   |
| United Kingdom           | 2008-2011  | National Diet and Nutrition Survey 2008/09-2010/11                                     | National                    | both                                  | 18+   | 18+         | 638  | 803    |
| United Kingdom           | 2009       | Health Survey for England                                                              | National                    | both                                  | 18+   | 18+         | 1790 | 2054   |
| United Kingdom           | 2009       | Scottish Healthy Survey 2009                                                           | Subnational                 | both                                  | 18+   | 18+         | 2757 | 3380   |
| United Kingdom           | 2010       | Health Survey for England                                                              | National                    | both                                  | 18+   | 18+         | 3046 | 3737   |
| United Kingdom           | 2010       | Scottish Healthy Survey 2010                                                           | Subnational                 | both                                  | 18+   | 18+         | 2616 | 3257   |
| United Kingdom           | 2011       | Health Survey for England                                                              | National                    | both                                  | 18+   | 18+         | 3099 | 3769   |
| United Kingdom           | 2011       | Scottish Healthy Survey 2011                                                           | Subnational                 | both                                  | 18+   | 18+         | 2688 | 3311   |
| United Kingdom           | 2012       | Health Survey for England                                                              | National                    | both                                  | 18+   | 18+         | 3033 | 3687   |
| United Kingdom           | 2012       | Scottish Healthy Survey 2012                                                           | Subnational                 | both                                  | 18+   | 18+         | 1835 | 2175   |
| United Kingdom           | 2012-2013  | English Longitudinal Study of Ageing Wave 6 2012-2013                                  | National                    | both                                  | 50+   | 50+         | 3257 | 4015   |
| United Kingdom           | 2013       | Health Survey for England                                                              | National                    | both                                  | 18+   | 18+         | 3246 | 3882   |
| United States of America | 1971-1975* | US NHANES I                                                                            | National                    | both                                  | 18-74 | 18-74       | 5250 | 8195   |
| United States of America | 1976-1980  | US NHANES II                                                                           | National                    | both                                  | 18-74 | 18-74       | 5919 | 6583   |
| United States of America | 1979-1980  | MONICA, Stanford                                                                       | Subnational                 | urban                                 | 25-64 | 25-64       | 703  | 806    |
| United States of America | 1980-1982  | The Minnesota Heart Survey                                                             | Community                   | both                                  | 25-75 | 25-75       | 1611 | 1837   |
| United States of America | 1985-1986  | INTERSALT, Chicago                                                                     | Community                   | urban                                 | 20-59 | 20-59       | 97   | 99     |
| United States of America | 1985-1986  | MONICA, Stanford                                                                       | Subnational                 | urban                                 | 25-64 | 25-64       | 713  | 848    |
| United States of America | 1985-1987  | The Minnesota Heart Survey                                                             | Community                   | both                                  | 25-75 | 25-75       | 5220 | 2421   |
| United States of America | 1986       | INTERSALT, Goodman                                                                     | Community                   | urban                                 | 20-59 | 20-59       | 192  | 192    |
| United States of America | 1986       | INTERSALT, Jackson                                                                     | Community                   | urban                                 | 20-59 | 20-59       | 184  | 199    |
| United States of America | 1988-1994  | US NHANES III                                                                          | National                    | both                                  | 18+   | 18+         | 8271 | 9096   |
| United States of America | 1989-1990  | MONICA, Stanford                                                                       | Subnational                 | urban                                 | 25-64 | 25-64       | 720  | 842    |
| United States of America | 1996       | National Longitudinal Study of Adolescent Health Wave II                               | National                    | both                                  | 18-21 | 18-21       | 503  | 449    |
| United States of America | 1996-1997  | International collaborative study of macronutrients, micronutrients and blood pressure | Community                   | urban                                 | 40-59 | 40-59       | 146  | 134    |
| United States of America | 1996-1997  | International collaborative study of macronutrients, micronutrients and blood pressure | Community                   | urban                                 | 40-59 | 40-59       | 132  | 134    |
| United States of America | 1996-1997  | International collaborative study of macronutrients, micronutrients and blood pressure | Community                   | urban                                 | 40-59 | 40-59       | 132  | 128    |
| United States of America | 1996-1997  | Study of Women's Health Across the Nation                                              | National                    | both                                  |       | 40-55       |      | 3199   |
| United States of America | 1996-1998  | International collaborative study of macronutrients, micronutrients and blood pressure | Community                   | urban                                 | 40-59 | 40-59       | 130  | 130    |
| United States of America | 1997-1998  | International collaborative study of macronutrients, micronutrients and blood pressure | Community                   | urban                                 | 40-59 | 40-59       | 271  | 276    |
| United States of America | 1997-1998  | International collaborative study of macronutrients, micronutrients and blood pressure | Community                   | urban                                 | 40-59 | 40-59       | 156  | 159    |
| United States of America | 1997-1999  | Study of Women's Health Across the Nation                                              | National                    | both                                  |       | 40-55       |      | 2760   |
| United States of America | 1998-2000  | Study of Women's Health Across the Nation                                              | National                    | both                                  |       | 40-55       |      | 2596   |
| United States of America | 1999-2000  | US NHANES 1999-2000                                                                    | National                    | both                                  | 18+   | 18+         | 2301 | 2319   |
| United States of America | 1999-2001  | Study of Women's Health Across the Nation                                              | National                    | both                                  |       | 40-56       |      | 2507   |
| United States of America | 2000-2002  | Study of Women's Health Across the Nation                                              | National                    | both                                  |       | 40-57       |      | 2440   |
| United States of America | 2001-2002  | National Longitudinal Study of Adolescent Health Wave III                              | National                    | both                                  | 18-28 | 18-28       | 2139 | 2443   |
| United States of America | 2001-2002  | US NHANES 2001-2002                                                                    | National                    | both                                  | 18+   | 18+         | 2506 | 2419   |
| United States of America | 2003-2004  | US NHANES 2003-2004                                                                    | National                    | both                                  | 18+   | 18+         | 2503 | 2446   |
| United States of America | 2005-2006  | US NHANES 2005-2006                                                                    | National                    | both                                  | 18+   | 18+         | 2511 | 2372   |
| United States of America | 2005-2006  | National Social Life Health and Aging Project                                          | National                    | both                                  | 57-85 | 57-85       | 1355 | 1435   |
| United States of America | 2007-2008  | US NHANES 2007-2008                                                                    | National                    | both                                  | 18+   | 18+         | 2902 | 2925   |
| United States of America | 2008-2009  | National Longitudinal Study of Adolescent Health Wave IV                               | National                    | both                                  | 24-34 | 24-34       | 2317 | 2725   |
| United States of America | 2009-2010  | US NHANES 2009-2010                                                                    | National                    | both                                  | 18+   | 18+         | 3051 | 3165   |

| Country                  | Data years | Survey/study name                                                                     | Level of representativeness | Age range as used for global analysis |       | Sample size |       |        |
|--------------------------|------------|---------------------------------------------------------------------------------------|-----------------------------|---------------------------------------|-------|-------------|-------|--------|
|                          |            |                                                                                       |                             | Rural, urban, or both                 | Male  | Female      | Male  | Female |
| United States of America | 2010-2011  | National Social Life Health and Aging Project                                         | National                    | both                                  | 36-99 | 36-99       | 1452  | 1738   |
| United States of America | 2011-2012  | US NHANES 2011-2012                                                                   | National                    | both                                  | 18+   | 18+         | 2737  | 2731   |
| Uruguay                  | 1999-2000  | The Survey on Health, Well-Being, and Aging in Latin America and the Caribbean (SABE) | Community                   | urban                                 | 60+   | 60+         | 492   | 828    |
| Uruguay                  | 2006       | STEPS                                                                                 | National                    | both                                  | 25-64 | 25-64       | 261   | 641    |
| Uruguay                  | 2011-2012  | CESCAS Study                                                                          | Community                   | urban                                 | 35-74 | 35-74       | 650   | 927    |
| Uzbekistan               | 1996       | DHS                                                                                   | National                    | both                                  |       | 18-49       |       | 3499   |
| Uzbekistan               | 2002       | DHS                                                                                   | National                    | both                                  | 18-59 | 18-49       | 2062  | 4559   |
| Vanuatu                  | 1996       | Second National Nutrition Survey                                                      | National                    | both                                  |       | 18-50       |       | 1353   |
| Vanuatu                  | 1998       | Vanuatu Non-communicable Disease Survey                                               | National                    | both                                  | 20-60 | 20-60       | 533   | 730    |
| Vanuatu                  | 2005       | STEPS                                                                                 | Subnational                 | both                                  | 18-60 | 18-60       | 583   | 701    |
| Vanuatu                  | 2011       | STEPS                                                                                 | National                    | both                                  | 25-64 | 25-64       | 2251  | 2181   |
| Venezuela                | 1999-2001  | Florez et al., Diabetes Res Clin Pract 69(1):63-77, 2005                              | Subnational                 | both                                  | 18+   | 18+         | 1134  | 2599   |
| Venezuela                | 2000       | Diaz et al., Invest Clin 46(2):111-19, 2005                                           | Community                   | urban                                 | 60+   | 60+         | 42    | 59     |
| Venezuela                | 2004-2005  | Cardiovascular Risk factors Multiple Evaluation in Latin America                      | Community                   | urban                                 | 25-64 | 25-64       | 713   | 1123   |
| Venezuela                | 2005-2006  | Brajkovich et al., Rev Ven Endoc Metab 4(3):31-32, 2006                               | Community                   | urban                                 | 20-65 | 20-65       | 205   | 439    |
| Venezuela                | 2007-2008  | Venezuelan Study of Metabolic Syndrome, Obesity and Lifestyle (VEMSOLS)               | Community                   | urban                                 | 20+   | 20+         | 107   | 230    |
| Venezuela                | 2008-2009  | Venezuelan Study of Metabolic Syndrome, Obesity and Lifestyle (VEMSOLS)               | Community                   | rural                                 | 20+   | 20+         | 51    | 89     |
| Venezuela                | 2010-2011  | Venezuelan Study of Metabolic Syndrome, Obesity and Lifestyle (VEMSOLS)               | Community                   | urban                                 | 20+   | 20+         | 66    | 193    |
| Viet Nam                 | 1981-1985  | National Nutrition Survey                                                             | Subnational                 | rural                                 | 18+   | 18+         | 4815  | 7985   |
| Viet Nam                 | 1987-1989  | General Nutrition Survey                                                              | National                    | both                                  | 18-70 | 18-70       | 13776 | 17271  |
| Viet Nam                 | 1992-1993  | Living Standard Survey                                                                | National                    | both                                  | 18+   | 18+         | 5620  | 6497   |
| Viet Nam                 | 1997-1998  | Living Standard Survey                                                                | National                    | both                                  | 18+   | 18+         | 7509  | 8761   |
| Viet Nam                 | 2000       | General Nutrition Study                                                               | National                    | both                                  | 20-59 | 20-59       | 9039  | 9328   |
| Viet Nam                 | 2000       | National Nutrition Survey                                                             | National                    | both                                  | 20+   | 20+         | 8985  | 9464   |
| Viet Nam                 | 2001-2002  | Viet Nam National Health Survey 2001-2002                                             | National                    | both                                  | 18+   | 18+         | 42413 | 48738  |
| Viet Nam                 | 2004       | Cuong et al., Eur J Clin Nutr 61(5):673-81, 2007                                      | Community                   | urban                                 | 20-60 | 20-60       | 717   | 771    |
| Viet Nam                 | 2005       | STEPS Bavi district                                                                   | Subnational                 | rural                                 | 25-64 | 25-64       | 987   | 997    |
| Viet Nam                 | 2005       | National Adult Overweight Survey                                                      | National                    | both                                  | 25-64 | 25-64       | 8474  | 8725   |
| Viet Nam                 | 2005       | Non-communicable disease risk factors in Ho Chi Minh City                             | Community                   | both                                  | 25-64 | 25-64       | 908   | 1063   |
| Viet Nam                 | 2008-2009  | The survey on diabetes and its risk factors in 2 northern provinces of Vietnam (DM-S) | Subnational                 | both                                  | 25+   | 25+         | 830   | 1446   |
| Viet Nam                 | 2009       | STEPS                                                                                 | National                    | both                                  | 25-64 | 25-64       | 6738  | 7804   |
| Viet Nam                 | 2009-2010  | General Nutrition Survey                                                              | National                    | both                                  | 20+   | 20+         | 10810 | 11729  |
| Viet Nam                 | 2013       | Global School-based Student Health Survey                                             | National                    | both                                  | 18-19 | 18-19       | 121   | 140    |
| Yemen                    | 1997       | DHS                                                                                   | National                    | both                                  | 18-49 | 18-49       |       | 5123   |
| Yemen                    | 2005-2006  | Yemen Household Budget Survey 2005-2006                                               | National                    | both                                  | 18+   | 18+         | 1557  | 1738   |
| Yemen                    | 2013       | DHS                                                                                   | National                    | both                                  |       | 18-49       |       | 18900  |
| Zambia                   | 1992       | DHS                                                                                   | National                    | both                                  |       | 18-49       |       | 3175   |
| Zambia                   | 1996       | DHS                                                                                   | National                    | both                                  |       | 18-49       |       | 3789   |
| Zambia                   | 2001-2002  | DHS                                                                                   | National                    | both                                  |       | 18-49       |       | 5800   |
| Zambia                   | 2003       | Kelly et al., Am J Clin Nutr 88(4):1010-17, 2008                                      | Community                   | urban                                 | 18-74 | 18-84       | 132   | 217    |
| Zambia                   | 2007       | DHS                                                                                   | National                    | both                                  |       | 18-49       |       | 5459   |
| Zambia                   | 2008       | STEPS                                                                                 | Community                   | urban                                 | 25+   | 25+         | 626   | 1214   |
| Zambia                   | 2013-2014  | DHS                                                                                   | National                    | both                                  |       | 18-49       |       | 12813  |
| Zimbabwe                 | 1985-1986  | INTERSALT                                                                             | Community                   | urban                                 | 20-59 | 20-59       | 100   | 95     |
| Zimbabwe                 | 1991       | Zinyowera et al., Cent Afr J Med 40(2):33-8, 1994                                     | Community                   | both                                  | 18+   | 18+         | 775   | 734    |
| Zimbabwe                 | 1994       | DHS                                                                                   | National                    | both                                  |       | 18-49       |       | 1934   |
| Zimbabwe                 | 1995       | Mufunda et al., J Hum Hypertens 14(1):65-73, 2000                                     | Community                   | urban                                 | 25+   | 25+         | 384   | 391    |
| Zimbabwe                 | 1999       | DHS                                                                                   | National                    | both                                  |       | 18-49       |       | 4324   |
| Zimbabwe                 | 2005       | STEPS                                                                                 | National                    | both                                  | 25-64 | 25-64       | 431   | 1556   |
| Zimbabwe                 | 2005-2006  | DHS                                                                                   | National                    | both                                  |       | 18-49       |       | 7017   |
| Zimbabwe                 | 2010-2011  | DHS                                                                                   | National                    | both                                  | 18-54 | 18-49       | 6284  | 7216   |

\* National studies for the 3 years prior to 1975 were assigned to 1975 so that they can inform the estimates in countries with older national data.

† This research uses data from China Health and Nutrition Survey (CHNS). We thank the National Institute of Nutrition and Food Safety, China Center for Disease Control and Prevention, Carolina Population Center (5 R24 HD050924), the University of North Carolina at Chapel Hill, the NIH (R01-HD30880, DK056350, R24 HD050924, and R01-HD38700) and the Fogarty International Center, NIH for financial support for the CHNS data collection and analysis files from 1989 to 2011 and future surveys, and the China-Japan Friendship Hospital, Ministry of Health for support for CHNS 2009.

**Appendix Table 3:** Coefficients of regressions to estimate the prevalences of different BMI categories when information was available on mean BMI. The dependent variables in all regressions were prevalences, fitted using a generalised linear mixed model fitted with a probit link. For each regression, 11,595 data points were used to fit the model.

| <b>BMI &lt;18.5 kg/m<sup>2</sup></b>                         |                              |
|--------------------------------------------------------------|------------------------------|
| <b>Variable</b>                                              | <b>Coefficient (95% CI)</b>  |
| Intercept                                                    | -7.38 (-7.49, -7.26)         |
| Inverse mean BMI                                             | 121.0 (120.0, 122.0)         |
| Mean age of age group                                        | -0.00061 (-0.00144, 0.00023) |
| Male sex                                                     | -0.79 (-0.82, -0.76)         |
| Study mid-year (per one more recent year since 1975)         | 0.00091 (0.00075, 0.00107)   |
| Natural logarithm of per-capita gross domestic product (GDP) | 0.074 (0.071, 0.077)         |
| Inverse mean BMI * mean age of age group                     | 0.078 (0.059, 0.097)         |
| Inverse mean BMI * male sex                                  | 14.4 (13.8, 15.1)            |

Traditional  $R^2$  is not clearly defined for mixed-effect models. The pseudo- $R^2$  for the model, which describes the proportion of variance explained by both fixed and random factors, was 0.90.

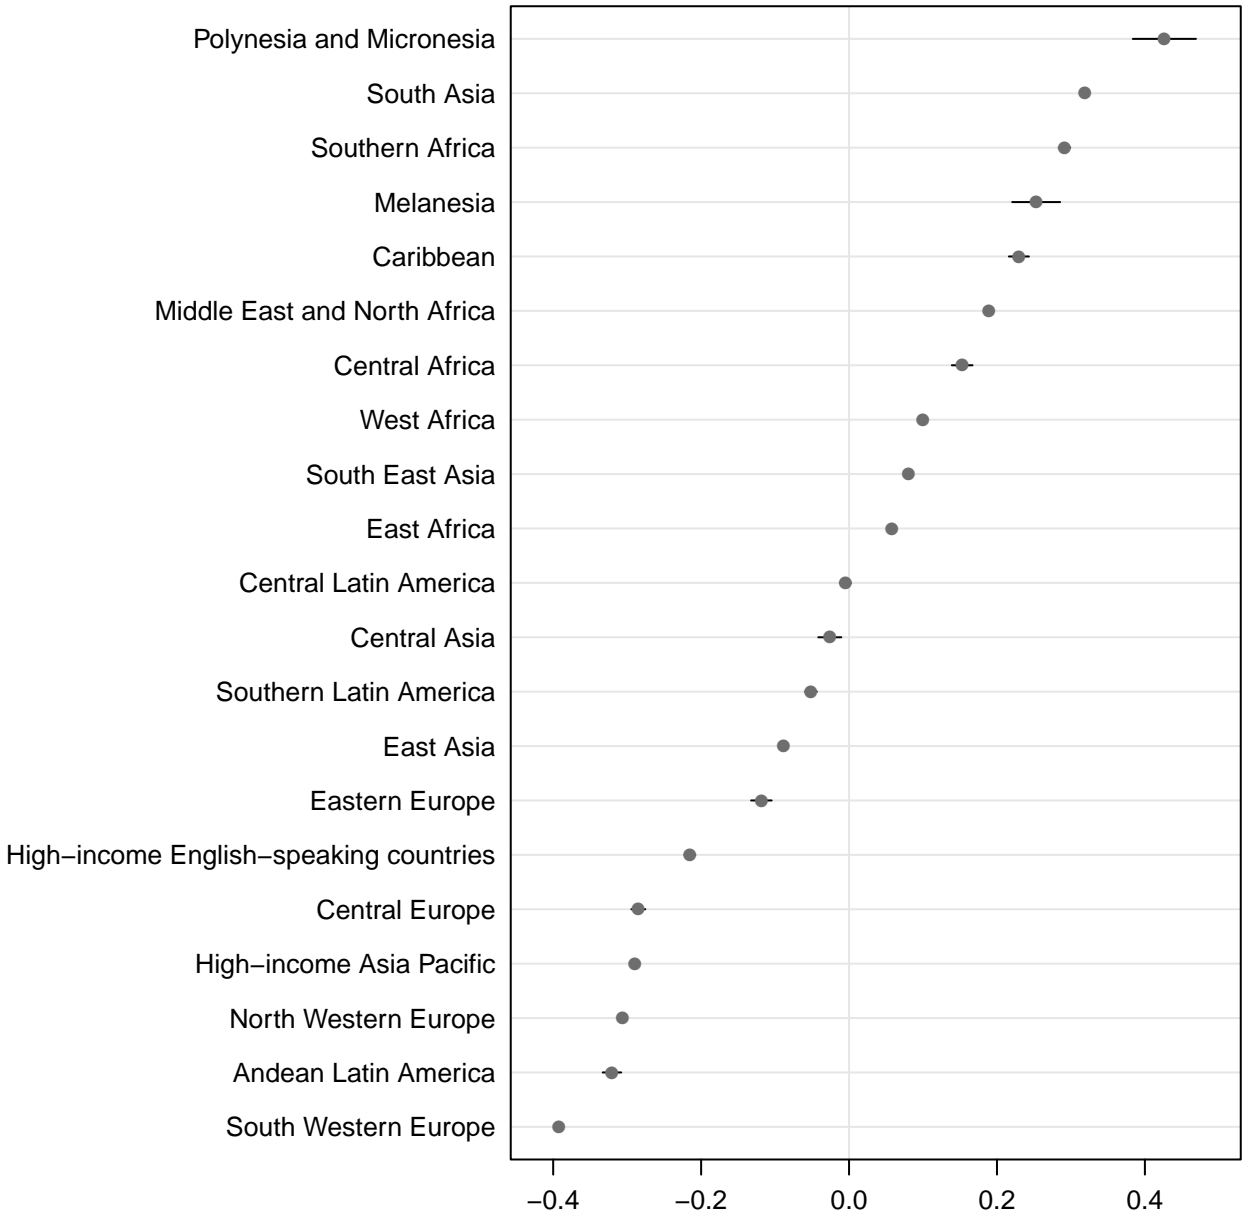

| <b>18.5 ≤ BMI &lt;20 kg/m<sup>2</sup></b>                    |                             |
|--------------------------------------------------------------|-----------------------------|
| <b>Variable</b>                                              | <b>Coefficient (95% CI)</b> |
| Intercept                                                    | -0.40 (-0.44, -0.35)        |
| Inverse (mean BMI – 19.25)                                   | -90.7 (-91.6, -89.8)        |
| Mean age of age group                                        | -0.0030 (-0.0031, -0.0028)  |
| Male sex                                                     | 0.155 (0.150, 0.161)        |
| Study mid-year (per one more recent year since 1975)         | 0.00027 (0.00013, 0.00040)  |
| Natural logarithm of per-capita gross domestic product (GDP) | 0.0134 (0.0108, 0.0160)     |
| [Inverse (mean BMI – 19.25)] * mean age of age group         | -0.054 (-0.071, -0.036)     |
| [Inverse (mean BMI – 19.25)] * male sex                      | -26.3 (-26.9, -25.7)        |

Traditional  $R^2$  is not clearly defined for mixed-effect models. The pseudo- $R^2$  for the model, which describes the proportion of variance explained by both fixed and random factors, was 0.87.

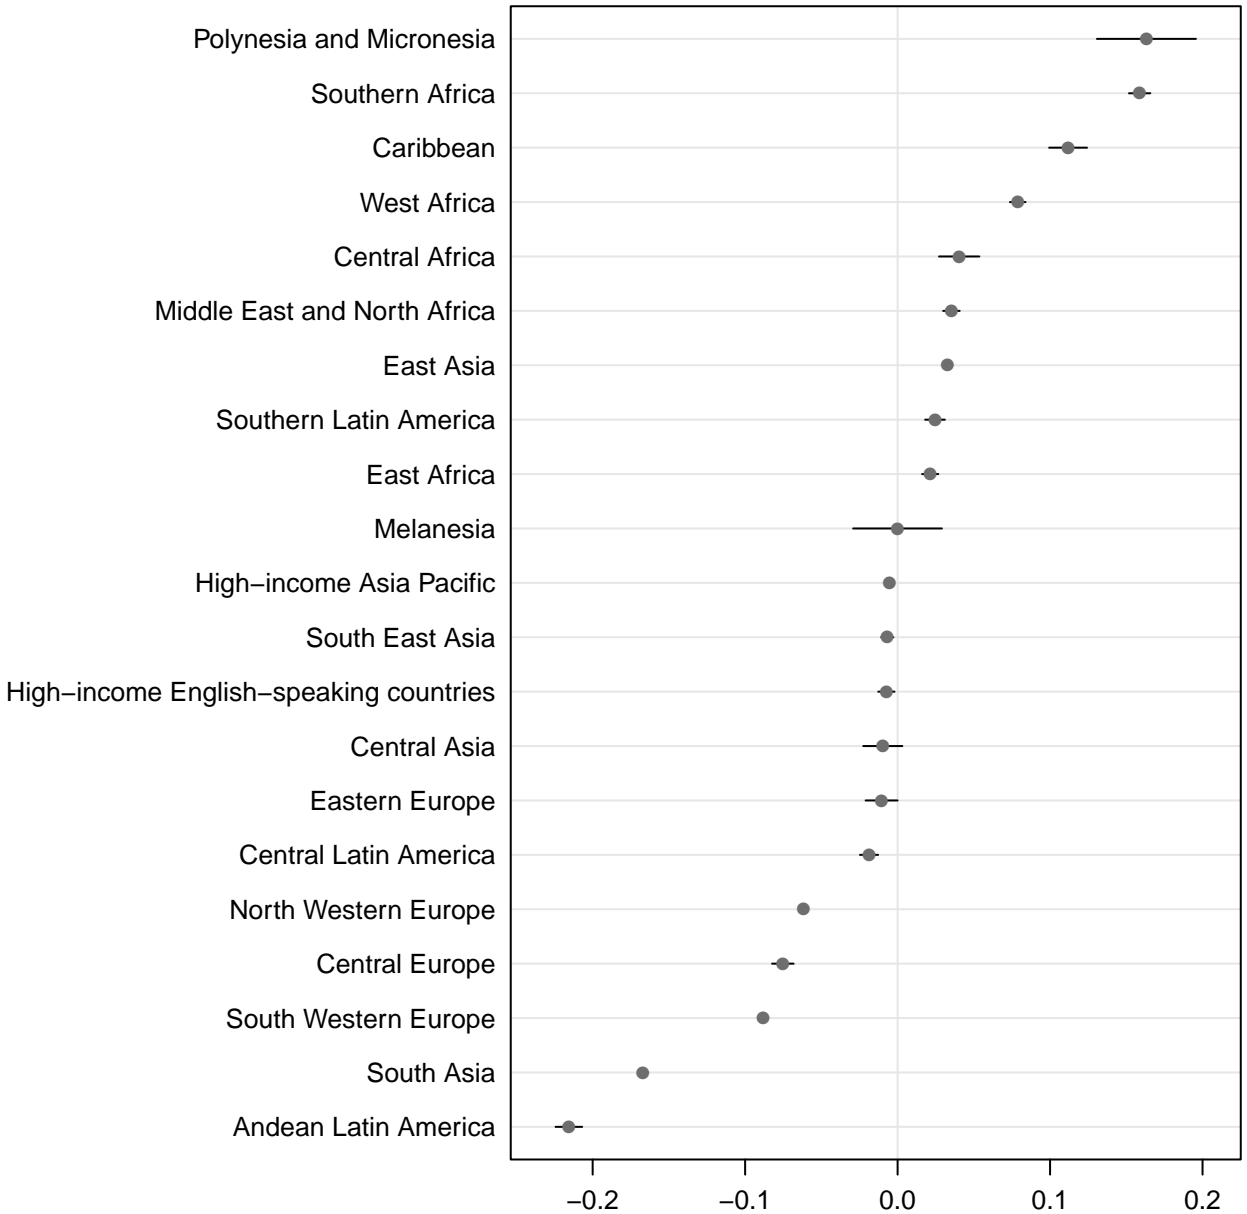

| <b>20 ≤ BMI &lt;25 kg/m<sup>2</sup></b>                      |                             |
|--------------------------------------------------------------|-----------------------------|
| <b>Variable</b>                                              | <b>Coefficient (95% CI)</b> |
| Intercept                                                    | 0.46 (0.42, 0.50)           |
| Inverse (mean BMI – 22.5)                                    | -58.3 (-59.2, -57.4)        |
| Mean age of age group                                        | 0.00049 (0.00041, 0.00057)  |
| Male sex                                                     | 0.144 (0.142, 0.147)        |
| Study mid-year (per one more recent year since 1975)         | -0.0024 (-0.0025, -0.0023)  |
| Natural logarithm of per-capita gross domestic product (GDP) | -0.020 (-0.022, -0.018)     |
| [Inverse (mean BMI – 22.5)] * mean age of age group          | -0.69 (-0.71, -0.67)        |
| [Inverse (mean BMI – 22.5)] * male sex                       | -25.7 (-26.2, -25.1)        |

Traditional  $R^2$  is not clearly defined for mixed-effect models. The pseudo- $R^2$  for the model, which describes the proportion of variance explained by both fixed and random factors, was 0.85.



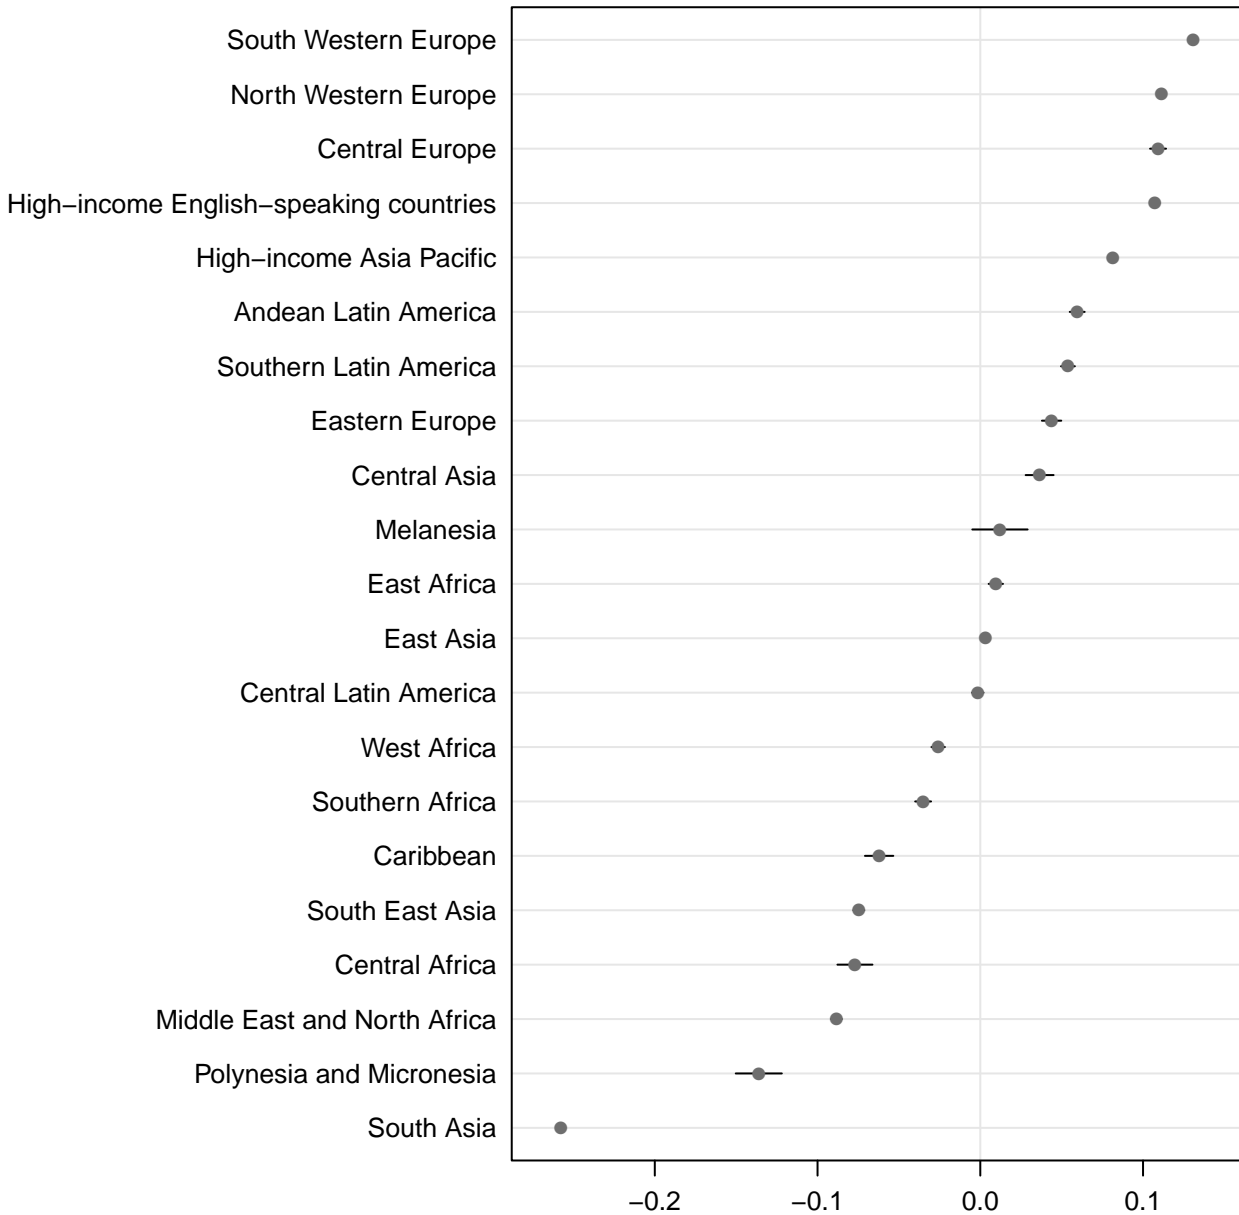

| <b>25 ≤ BMI &lt;30 kg/m<sup>2</sup></b>                      |                               |
|--------------------------------------------------------------|-------------------------------|
| <b>Variable</b>                                              | <b>Coefficient (95% CI)</b>   |
| Intercept                                                    | -0.41 (-0.45, -0.38)          |
| Inverse (mean BMI – 27.5)                                    | -120.0 (-121.0, -120.0)       |
| Mean age of age group                                        | 0.00089 (0.00079, 0.00100)    |
| Male sex                                                     | 0.290 (0.287, 0.293)          |
| Study mid-year (per one more recent year since 1975)         | -0.00025 (-0.00036, -0.00013) |
| Natural logarithm of per-capita gross domestic product (GDP) | 0.022 (0.020, 0.024)          |
| [Inverse (mean BMI – 27.5)] * mean age of age group          | 0.44 (0.43, 0.46)             |
| [Inverse (mean BMI – 27.5)] * male sex                       | -36.2 (-36.6, -35.7)          |

Traditional  $R^2$  is not clearly defined for mixed-effect models. The pseudo- $R^2$  for the model, which describes the proportion of variance explained by both fixed and random factors, was 0.91.

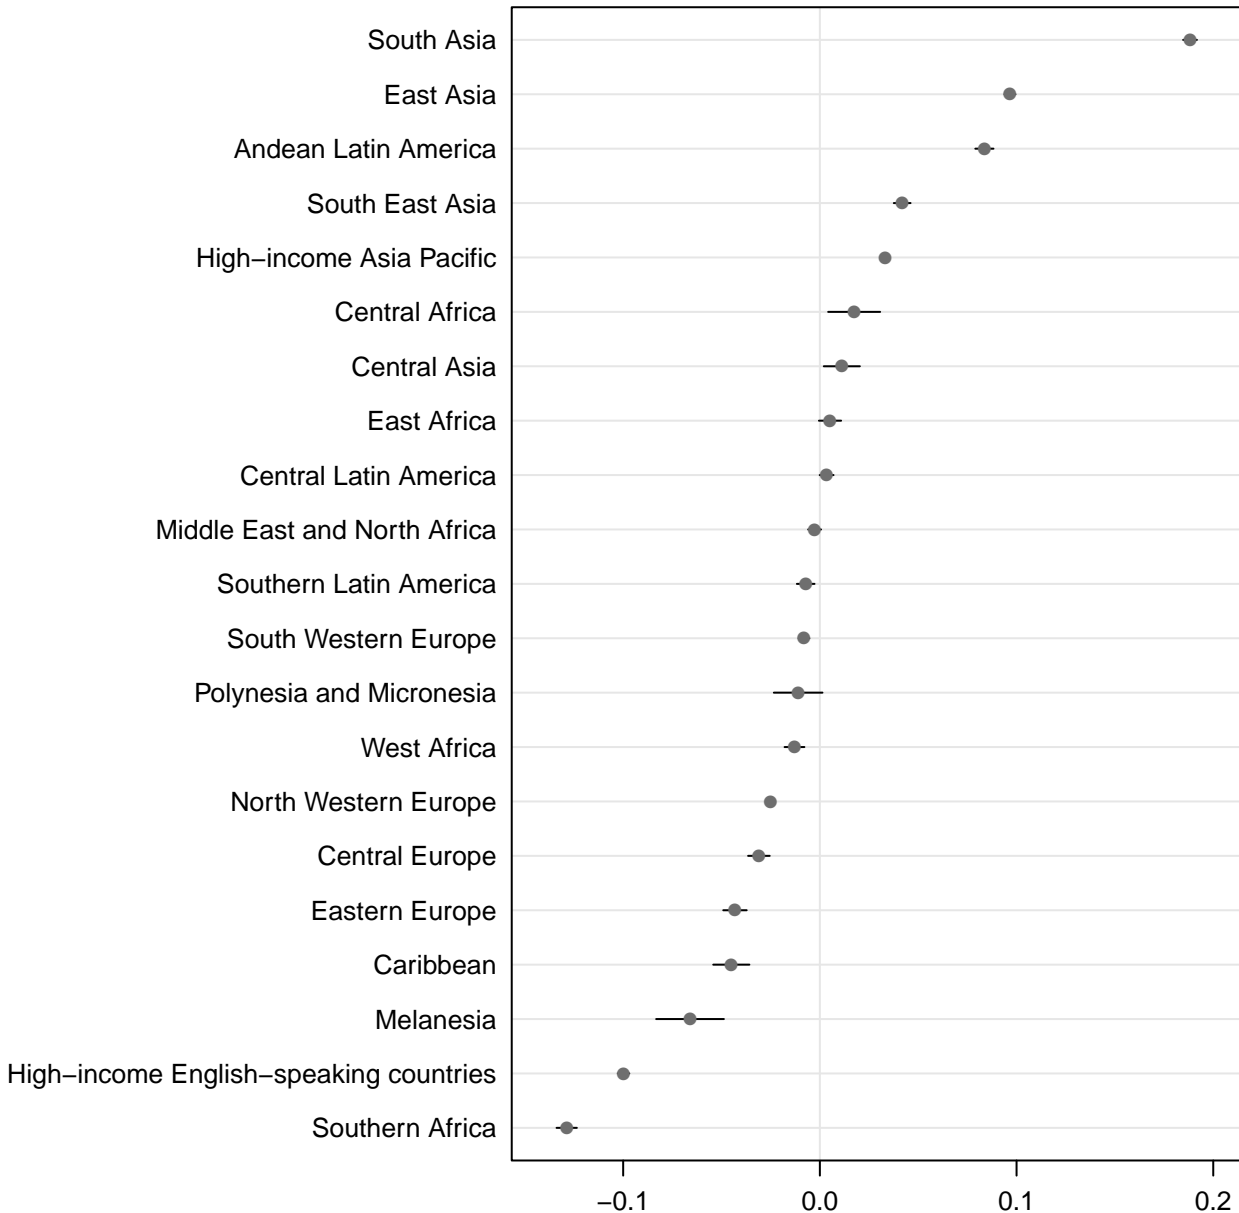

| <b>30 ≤ BMI &lt;35 kg/m<sup>2</sup></b>                      |                             |
|--------------------------------------------------------------|-----------------------------|
| <b>Variable</b>                                              | <b>Coefficient (95% CI)</b> |
| Intercept                                                    | -0.74 (-0.78, -0.70)        |
| Inverse (mean BMI – 32.5)                                    | -97.2 (-98.2, -96.2)        |
| Mean age of age group                                        | 0.0021 (0.0019, 0.0023)     |
| Male sex                                                     | 0.158 (0.152, 0.165)        |
| Study mid-year (per one more recent year since 1975)         | 0.0028 (0.0026, 0.0030)     |
| Natural logarithm of per-capita gross domestic product (GDP) | 0.022 (0.019, 0.025)        |
| [Inverse (mean BMI – 32.5)] * mean age of age group          | -0.20 (-0.22, -0.18)        |
| [Inverse (mean BMI – 32.5)] * male sex                       | -25.7 (-26.3, -25.1)        |

Traditional  $R^2$  is not clearly defined for mixed-effect models. The pseudo- $R^2$  for the model, which describes the proportion of variance explained by both fixed and random factors, was 0.91.

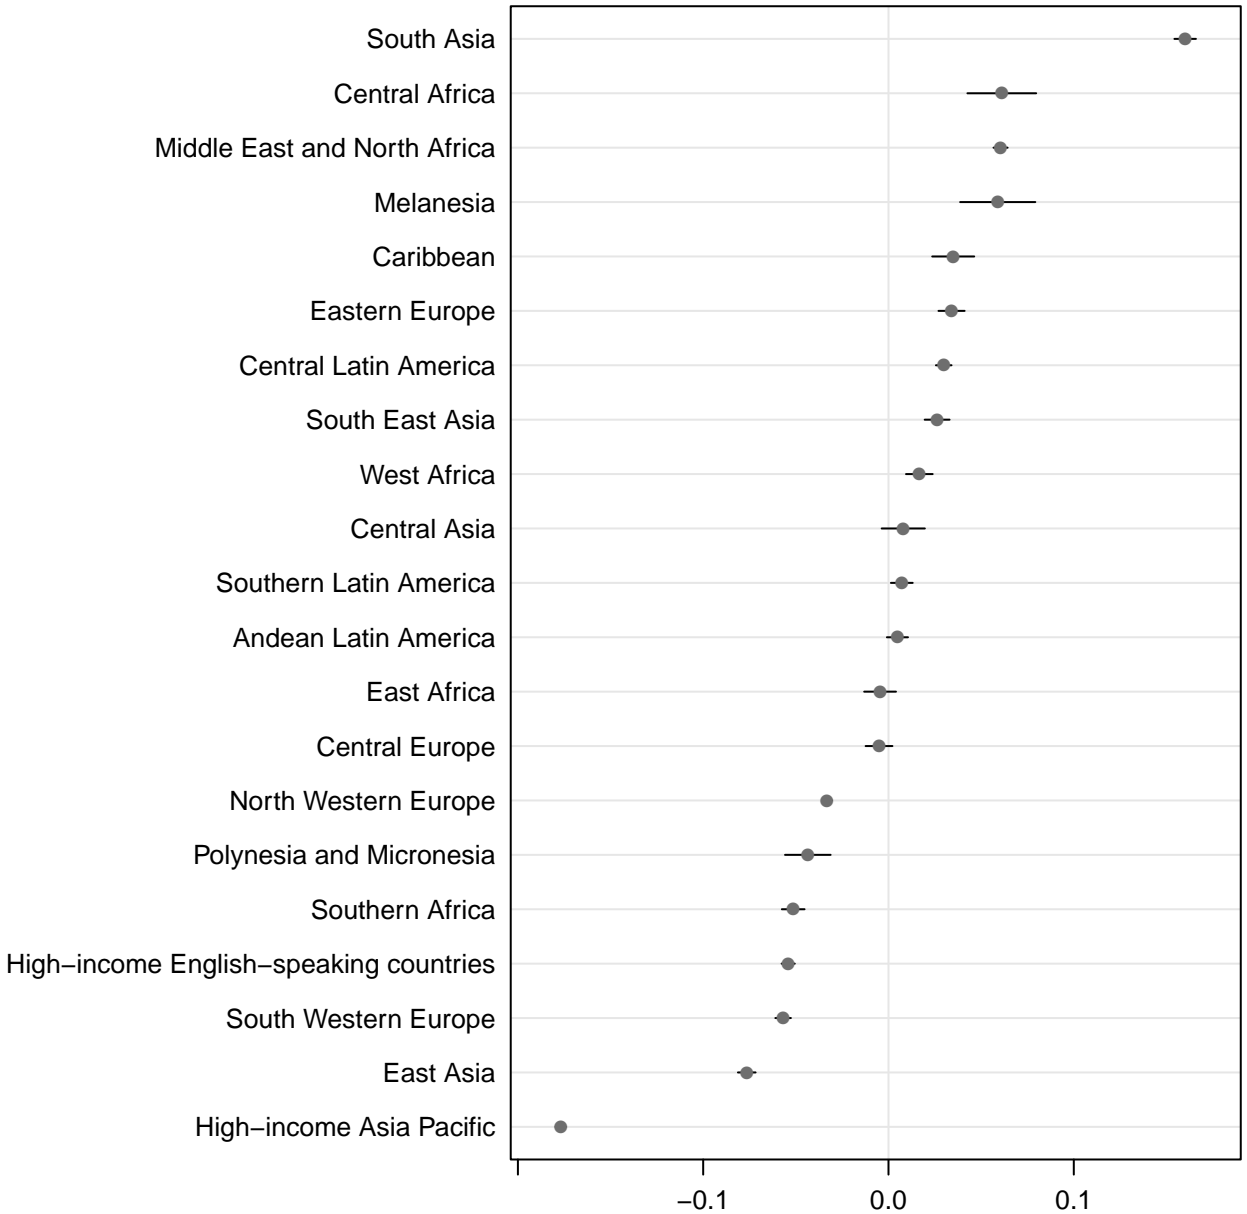

| <b>35 ≤ BMI &lt;40 kg/m<sup>2</sup></b>                      |                             |
|--------------------------------------------------------------|-----------------------------|
| <b>Variable</b>                                              | <b>Coefficient (95% CI)</b> |
| Intercept                                                    | -1.07 (-1.13, -1.00)        |
| Inverse (mean BMI – 37.5)                                    | -85.4 (-87.0, -83.7)        |
| Mean age of age group                                        | 0.0047 (0.0042, 0.0051)     |
| Male sex                                                     | -0.167 (-0.181, -0.152)     |
| Study mid-year (per one more recent year since 1975)         | 0.0051 (0.0048, 0.0054)     |
| Natural logarithm of per-capita gross domestic product (GDP) | 0.022 (0.017, 0.027)        |
| [Inverse (mean BMI – 37.5)] * mean age of age group          | -0.61 (-0.64, -0.57)        |
| [Inverse (mean BMI – 37.5)] * male sex                       | -4.89 (-6.01, -3.77)        |

Traditional  $R^2$  is not clearly defined for mixed-effect models. The pseudo- $R^2$  for the model, which describes the proportion of variance explained by both fixed and random factors, was 0.86.

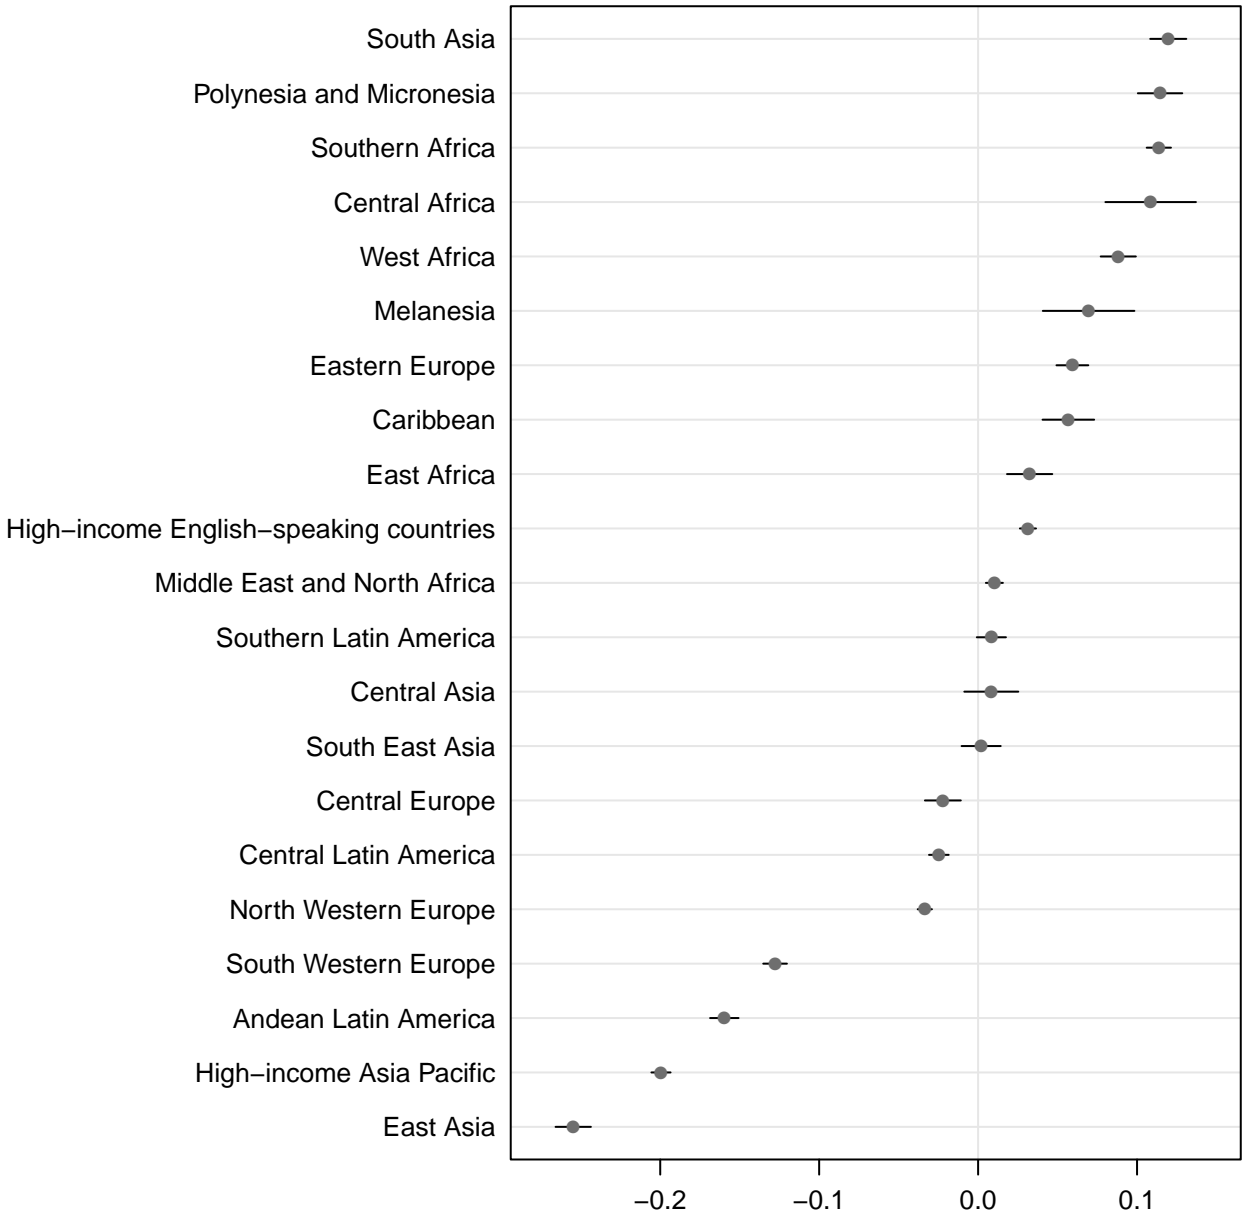

| <b>BMI <math>\geq</math>40 kg/m<sup>2</sup></b>              |                             |
|--------------------------------------------------------------|-----------------------------|
| <b>Variable</b>                                              | <b>Coefficient (95% CI)</b> |
| Intercept                                                    | 1.16 (1.02, 1.29)           |
| Inverse mean BMI                                             | -97.4 (-99.9, -94.8)        |
| Mean age of age group                                        | 0.0068 (0.0047, 0.0090)     |
| Male sex                                                     | -0.66 (-0.73, -0.59)        |
| Study mid-year (per one more recent year since 1975)         | 0.0060 (0.0056, 0.0064)     |
| Natural logarithm of per-capita gross domestic product (GDP) | 0.042 (0.036, 0.048)        |
| Inverse mean BMI * mean age of age group                     | -0.295 (-0.352, -0.238)     |
| Inverse mean BMI * male sex                                  | 9.74 (7.98, 11.50)          |

Traditional  $R^2$  is not clearly defined for mixed-effect models. The pseudo- $R^2$  for the model, which describes the proportion of variance explained by both fixed and random factors, was 0.81.



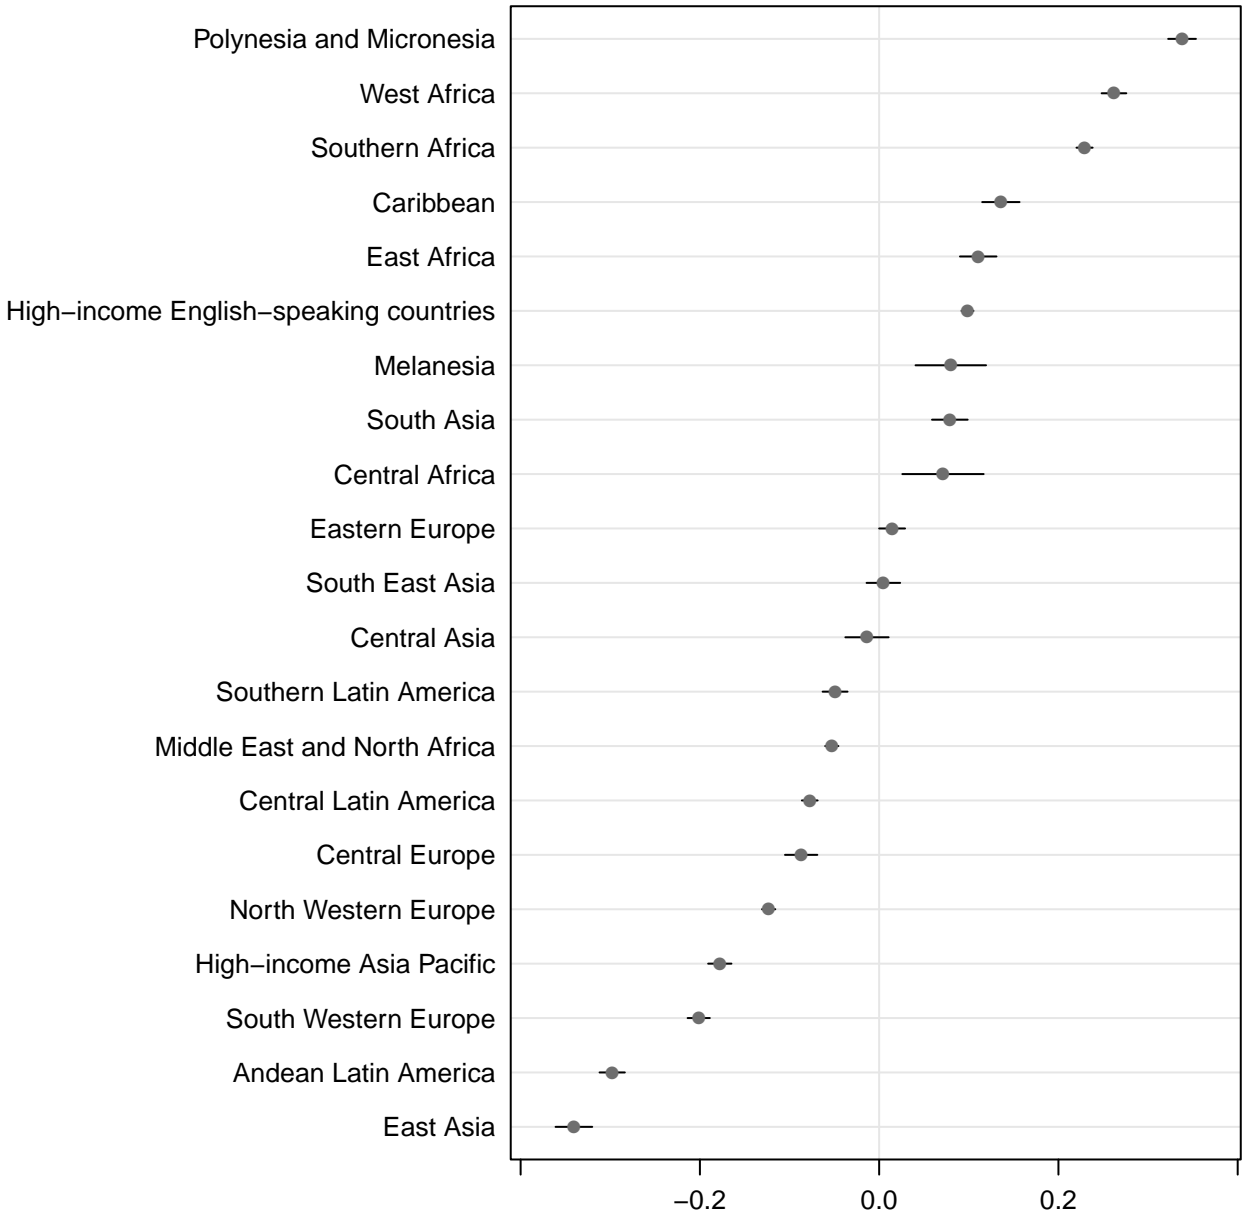

**Appendix Table 4:** Age-standardised mean BMI by sex and country in 1975, 1985, 1995, 2005, and 2014. Numbers in brackets show 95% credible intervals. Estimates for all countries and years can be downloaded from [www.ncdrisc.org](http://www.ncdrisc.org).

## Men

| Country                  | Year             |                  |                  |                  |                  |
|--------------------------|------------------|------------------|------------------|------------------|------------------|
|                          | 1975             | 1985             | 1995             | 2005             | 2014             |
| Afghanistan              | 19.5 (17.0-21.8) | 20.1 (18.1-22.2) | 20.6 (18.7-22.6) | 21.0 (19.1-23.0) | 21.6 (19.4-23.8) |
| Albania                  | 23.7 (21.7-25.7) | 24.4 (23.1-25.8) | 24.9 (23.9-25.9) | 25.8 (25.1-26.5) | 26.5 (25.5-27.6) |
| Algeria                  | 21.4 (19.3-23.5) | 22.4 (21.2-23.7) | 23.2 (22.4-24.2) | 23.8 (23.2-24.5) | 24.3 (23.0-25.5) |
| American Samoa           | 29.0 (28.1-30.0) | 31.6 (31.0-32.3) | 33.2 (32.5-33.8) | 32.9 (32.2-33.6) | 32.2 (30.5-33.7) |
| Andorra                  | 25.2 (22.7-27.6) | 25.9 (23.9-27.9) | 26.4 (24.4-28.3) | 27.2 (25.2-29.1) | 27.7 (25.4-29.9) |
| Angola                   | 19.9 (17.2-22.7) | 20.7 (18.4-22.9) | 21.2 (19.1-23.3) | 21.8 (19.8-23.9) | 22.8 (20.4-25.1) |
| Antigua and Barbuda      | 23.0 (20.4-25.5) | 23.9 (21.9-25.9) | 25.0 (23.1-27.0) | 26.1 (24.2-28.0) | 27.2 (25.0-29.5) |
| Argentina                | 24.7 (23.0-26.4) | 25.4 (24.5-26.2) | 26.0 (25.2-26.7) | 26.7 (26.1-27.4) | 27.6 (26.5-28.6) |
| Armenia                  | 23.0 (20.8-25.3) | 23.7 (22.3-25.1) | 24.0 (22.9-25.1) | 24.8 (24.0-25.6) | 25.9 (24.5-27.3) |
| Australia                | 24.6 (23.9-25.4) | 25.2 (24.9-25.6) | 26.1 (25.8-26.4) | 27.0 (26.7-27.3) | 27.5 (26.9-28.1) |
| Austria                  | 24.1 (22.9-25.4) | 24.7 (24.0-25.5) | 25.4 (24.7-26.1) | 26.1 (25.2-26.9) | 26.6 (25.1-28.1) |
| Azerbaijan               | 23.2 (21.1-25.3) | 24.1 (23.0-25.3) | 24.6 (23.8-25.4) | 25.1 (24.4-25.7) | 26.4 (25.1-27.6) |
| Bahamas                  | 23.9 (21.5-26.3) | 24.7 (22.7-26.7) | 25.6 (23.6-27.5) | 26.5 (24.6-28.4) | 27.2 (25.0-29.4) |
| Bahrain                  | 23.1 (20.9-25.3) | 24.1 (23.1-25.3) | 25.1 (24.4-25.8) | 25.3 (24.7-25.9) | 24.9 (23.6-26.2) |
| Bangladesh               | 18.9 (17.1-20.7) | 19.6 (18.7-20.7) | 20.2 (19.6-20.8) | 20.6 (20.2-21.1) | 20.8 (20.0-21.7) |
| Barbados                 | 23.2 (21.3-25.1) | 24.1 (23.1-25.0) | 24.8 (24.1-25.5) | 25.7 (24.8-26.6) | 26.7 (25.0-28.3) |
| Belarus                  | 24.0 (21.5-26.5) | 24.7 (22.6-26.7) | 25.1 (23.1-27.1) | 25.8 (23.9-27.8) | 26.7 (24.6-28.9) |
| Belgium                  | 24.4 (23.2-25.7) | 24.9 (24.5-25.4) | 25.5 (25.1-25.9) | 26.2 (25.8-26.7) | 26.9 (25.9-27.9) |
| Belize                   | 23.6 (21.4-25.7) | 24.4 (23.0-25.8) | 25.3 (24.2-26.4) | 26.4 (25.5-27.3) | 27.3 (25.9-28.7) |
| Benin                    | 20.2 (18.0-22.3) | 20.8 (19.4-22.1) | 21.3 (20.2-22.4) | 22.0 (21.3-22.7) | 22.5 (21.5-23.6) |
| Bermuda                  | 24.7 (22.1-27.2) | 25.4 (23.3-27.5) | 26.1 (24.1-28.1) | 26.9 (25.0-28.9) | 28.0 (25.7-30.2) |
| Bhutan                   | 19.6 (17.6-21.5) | 20.5 (19.0-22.0) | 21.6 (20.2-22.8) | 22.5 (21.6-23.5) | 23.3 (22.5-24.0) |
| Bolivia                  | 21.8 (19.5-24.1) | 22.5 (21.0-24.2) | 23.2 (21.9-24.6) | 24.1 (23.0-25.2) | 25.0 (23.5-26.6) |
| Bosnia and Herzegovina   | 22.4 (20.2-24.6) | 23.2 (21.7-24.6) | 23.8 (22.6-25.0) | 25.3 (24.4-26.1) | 25.9 (24.9-26.8) |
| Botswana                 | 19.1 (16.9-21.3) | 20.2 (18.8-21.7) | 21.3 (20.2-22.5) | 22.0 (21.2-22.8) | 22.7 (21.4-23.9) |
| Brazil                   | 22.2 (20.5-24.0) | 23.3 (22.6-24.0) | 24.1 (23.7-24.5) | 24.9 (24.6-25.2) | 25.6 (24.9-26.3) |
| Brunei Darussalam        | 22.7 (19.9-25.6) | 23.5 (21.3-25.7) | 24.1 (22.1-26.1) | 24.9 (22.8-26.8) | 25.5 (23.2-27.8) |
| Bulgaria                 | 24.1 (22.1-26.0) | 25.0 (23.8-26.3) | 25.6 (24.6-26.6) | 26.0 (25.2-26.8) | 26.6 (25.3-28.0) |
| Burkina Faso             | 19.6 (17.3-21.8) | 20.1 (18.6-21.6) | 20.6 (19.4-21.9) | 21.4 (20.5-22.3) | 22.1 (21.3-22.9) |
| Burundi                  | 18.5 (15.8-21.3) | 19.3 (17.1-21.6) | 20.1 (18.0-22.1) | 20.4 (18.4-22.3) | 20.8 (18.5-22.9) |
| Cabo Verde               | 20.2 (17.9-22.3) | 21.0 (19.5-22.3) | 21.8 (20.7-23.0) | 23.1 (22.3-23.9) | 24.0 (22.7-25.2) |
| Cambodia                 | 19.0 (16.8-21.1) | 19.5 (18.0-20.9) | 20.1 (18.8-21.3) | 20.9 (20.0-21.7) | 21.8 (20.8-22.8) |
| Cameroon                 | 20.7 (18.6-22.8) | 21.6 (20.3-22.8) | 22.1 (21.3-23.0) | 22.9 (22.1-23.6) | 23.5 (22.1-24.8) |
| Canada                   | 24.6 (23.5-25.7) | 25.5 (25.0-25.9) | 26.4 (25.9-26.8) | 27.1 (26.7-27.6) | 27.4 (26.5-28.3) |
| Central African Republic | 19.8 (17.3-22.3) | 20.2 (18.3-22.1) | 20.6 (18.9-22.3) | 21.0 (19.6-22.4) | 21.5 (19.9-23.0) |
| Chad                     | 19.6 (17.3-21.9) | 20.0 (18.3-21.6) | 20.5 (19.0-21.9) | 21.2 (20.0-22.5) | 22.0 (20.4-23.5) |
| Chile                    | 24.2 (22.3-26.2) | 24.9 (23.9-25.9) | 25.8 (25.2-26.4) | 26.8 (26.3-27.2) | 27.7 (26.9-28.4) |
| China                    | 21.0 (19.9-22.1) | 21.5 (21.2-21.8) | 22.1 (21.9-22.3) | 23.0 (22.7-23.2) | 24.3 (23.7-24.8) |
| China (Hong Kong SAR)    | 22.1 (20.3-24.0) | 22.8 (21.9-23.8) | 23.6 (22.9-24.3) | 24.2 (23.2-25.3) | 25.1 (23.3-27.0) |
| Colombia                 | 21.9 (19.9-23.7) | 22.7 (21.7-23.7) | 23.6 (22.8-24.4) | 24.6 (24.2-25.0) | 25.5 (24.7-26.4) |
| Comoros                  | 20.8 (18.4-22.9) | 21.4 (19.8-22.9) | 22.0 (20.7-23.3) | 22.6 (21.6-23.5) | 23.1 (22.2-24.0) |
| Congo                    | 19.7 (17.7-21.8) | 20.6 (19.4-21.9) | 21.2 (20.3-22.1) | 21.7 (20.6-22.7) | 22.2 (20.5-24.0) |
| Cook Islands             | 27.5 (25.6-29.5) | 29.5 (28.2-30.8) | 31.0 (29.9-32.0) | 31.4 (30.5-32.3) | 31.5 (29.8-33.0) |
| Costa Rica               | 22.9 (20.7-25.1) | 24.0 (22.6-25.5) | 25.0 (23.9-26.1) | 25.9 (25.2-26.6) | 26.5 (25.7-27.4) |
| Cote d'Ivoire            | 21.0 (18.9-23.1) | 21.6 (20.3-22.8) | 22.0 (21.1-23.0) | 22.7 (22.1-23.3) | 23.3 (22.0-24.5) |
| Croatia                  | 23.6 (21.6-25.6) | 24.6 (23.4-25.7) | 25.2 (24.4-26.1) | 26.2 (25.3-27.0) | 27.0 (25.5-28.5) |
| Cuba                     | 22.1 (20.5-23.7) | 23.1 (22.2-24.0) | 23.7 (22.9-24.5) | 24.3 (23.8-24.9) | 25.3 (24.3-26.1) |
| Cyprus                   | 23.9 (21.9-25.9) | 25.1 (23.9-26.3) | 26.2 (25.3-27.1) | 27.2 (26.3-28.1) | 27.8 (26.3-29.4) |
| Czech Republic           | 25.6 (24.1-27.0) | 26.4 (25.8-26.9) | 26.7 (26.3-27.1) | 27.1 (26.7-27.6) | 27.6 (26.5-28.7) |
| Denmark                  | 23.2 (22.7-23.6) | 24.1 (23.7-24.4) | 24.9 (24.4-25.4) | 25.6 (25.1-26.1) | 26.0 (25.0-26.9) |
| Djibouti                 | 21.1 (18.6-23.7) | 21.5 (19.4-23.7) | 22.0 (20.0-24.0) | 22.2 (20.2-24.1) | 22.4 (20.2-24.6) |
| Dominica                 | 21.4 (19.3-23.7) | 22.2 (20.8-23.7) | 23.2 (22.0-24.4) | 24.1 (23.2-24.9) | 24.9 (23.7-26.2) |
| Dominican Republic       | 21.7 (19.7-23.7) | 22.8 (21.9-23.8) | 23.7 (23.2-24.3) | 24.8 (24.1-25.4) | 25.4 (24.6-26.2) |
| DR Congo                 | 19.3 (17.0-21.7) | 19.9 (18.2-21.6) | 20.2 (18.7-21.7) | 20.3 (19.0-21.6) | 20.8 (19.1-22.6) |
| Ecuador                  | 22.4 (20.2-24.6) | 23.4 (21.8-24.9) | 24.2 (23.0-25.5) | 25.2 (24.4-26.0) | 26.4 (25.6-27.2) |
| Egypt                    | 24.1 (22.1-26.0) | 25.4 (24.5-26.3) | 26.3 (25.8-26.9) | 26.9 (26.5-27.2) | 27.3 (26.5-28.1) |

|                   |                  |                  |                  |                  |                  |
|-------------------|------------------|------------------|------------------|------------------|------------------|
| El Salvador       | 23.1 (20.8-25.4) | 23.9 (22.3-25.6) | 24.8 (23.4-26.2) | 25.8 (24.6-27.1) | 26.5 (24.8-28.2) |
| Equatorial Guinea | 19.7 (16.9-22.5) | 20.4 (18.2-22.7) | 21.0 (18.9-23.2) | 23.1 (21.0-25.2) | 24.2 (21.7-26.6) |
| Eritrea           | 18.7 (16.6-20.9) | 19.4 (18.1-20.7) | 20.0 (19.0-21.0) | 20.3 (19.7-20.9) | 20.2 (19.3-21.1) |
| Estonia           | 24.2 (22.4-25.9) | 24.7 (23.8-25.5) | 25.1 (24.6-25.6) | 26.1 (25.8-26.4) | 26.8 (26.2-27.3) |
| Ethiopia          | 18.6 (16.4-20.8) | 19.2 (17.8-20.7) | 19.6 (18.4-20.8) | 19.8 (19.0-20.6) | 20.1 (19.2-21.0) |
| Fiji              | 22.8 (20.7-24.8) | 23.9 (22.7-25.2) | 24.8 (23.9-25.7) | 25.7 (25.1-26.2) | 26.2 (25.4-27.0) |
| Finland           | 24.4 (23.3-25.5) | 25.2 (24.8-25.6) | 25.9 (25.5-26.2) | 26.3 (26.1-26.6) | 26.4 (25.9-26.9) |
| France            | 24.3 (22.7-25.9) | 24.8 (24.1-25.4) | 25.1 (24.6-25.6) | 25.6 (25.1-26.1) | 26.1 (25.2-27.0) |
| French Polynesia  | 26.5 (24.5-28.7) | 28.3 (26.8-29.9) | 29.5 (28.2-30.9) | 29.7 (28.8-30.6) | 29.5 (28.5-30.5) |
| Gabon             | 20.8 (18.3-23.3) | 22.1 (20.3-24.0) | 22.9 (21.3-24.6) | 23.6 (22.2-24.9) | 24.1 (22.5-25.7) |
| Gambia            | 19.9 (17.6-22.1) | 20.2 (19.0-21.4) | 20.8 (20.0-21.5) | 22.0 (21.3-22.6) | 23.1 (22.1-24.2) |
| Georgia           | 23.9 (21.7-26.1) | 24.9 (23.3-26.4) | 25.2 (23.9-26.5) | 26.0 (25.1-26.8) | 27.0 (26.0-28.0) |
| Germany           | 24.3 (23.3-25.4) | 25.1 (24.7-25.4) | 25.8 (25.4-26.1) | 26.5 (26.1-26.8) | 27.1 (26.2-27.9) |
| Ghana             | 20.6 (18.5-22.7) | 21.1 (19.9-22.3) | 21.7 (20.9-22.5) | 22.5 (21.9-23.1) | 23.3 (22.2-24.5) |
| Greece            | 24.9 (23.2-26.7) | 25.7 (24.9-26.6) | 26.4 (25.8-27.0) | 27.0 (26.3-27.7) | 27.4 (26.1-28.7) |
| Greenland         | 23.3 (21.6-25.1) | 24.2 (23.0-25.5) | 24.9 (23.8-26.0) | 25.6 (24.8-26.4) | 26.1 (25.0-27.2) |
| Grenada           | 21.4 (19.2-23.6) | 22.3 (20.8-23.9) | 23.3 (21.9-24.6) | 24.3 (23.3-25.3) | 25.2 (24.2-26.1) |
| Guatemala         | 22.2 (20.1-24.3) | 23.1 (21.8-24.3) | 23.8 (23.0-24.7) | 24.8 (24.1-25.5) | 25.5 (24.1-26.9) |
| Guinea            | 19.9 (17.6-22.2) | 20.6 (19.0-22.2) | 21.1 (19.6-22.5) | 21.7 (20.6-22.9) | 22.2 (20.8-23.6) |
| Guinea Bissau     | 20.1 (17.4-22.6) | 20.6 (18.6-22.7) | 21.3 (19.3-23.2) | 21.8 (20.0-23.7) | 22.3 (20.1-24.4) |
| Guyana            | 21.6 (19.6-23.8) | 22.4 (21.0-23.9) | 23.1 (21.8-24.3) | 24.1 (23.3-25.0) | 25.0 (23.9-26.1) |
| Haiti             | 21.0 (18.4-23.5) | 21.7 (19.6-23.7) | 22.3 (20.3-24.3) | 23.2 (21.4-25.2) | 24.0 (21.8-26.3) |
| Honduras          | 22.0 (19.8-24.2) | 22.9 (21.4-24.5) | 23.8 (22.5-25.1) | 24.7 (23.5-25.9) | 25.5 (23.8-27.1) |
| Hungary           | 24.5 (23.0-26.0) | 25.4 (24.9-26.0) | 26.1 (25.4-26.8) | 26.8 (26.0-27.7) | 27.4 (26.0-28.9) |
| Iceland           | 24.1 (22.7-25.4) | 25.0 (24.3-25.6) | 25.6 (24.9-26.3) | 26.3 (25.3-27.3) | 26.8 (25.2-28.4) |
| India             | 18.6 (17.8-19.4) | 19.6 (19.2-20.1) | 20.3 (20.0-20.6) | 20.9 (20.7-21.2) | 21.2 (20.5-21.8) |
| Indonesia         | 19.3 (17.6-21.1) | 20.0 (19.2-20.8) | 20.7 (20.3-21.1) | 21.5 (21.1-21.8) | 22.3 (21.7-23.0) |
| Iran              | 21.9 (20.0-23.8) | 22.9 (21.9-23.8) | 23.7 (23.2-24.2) | 24.6 (24.4-24.9) | 25.3 (24.6-25.9) |
| Iraq              | 24.0 (21.9-25.9) | 24.9 (23.6-26.2) | 25.5 (24.5-26.6) | 26.3 (25.5-27.0) | 26.9 (25.7-28.1) |
| Ireland           | 24.0 (22.4-25.8) | 25.0 (24.0-26.0) | 26.1 (25.5-26.7) | 27.3 (26.9-27.7) | 27.8 (27.0-28.6) |
| Israel            | 24.4 (22.7-26.2) | 25.0 (24.1-25.9) | 25.6 (25.0-26.2) | 26.4 (25.9-26.9) | 27.1 (25.9-28.3) |
| Italy             | 24.4 (23.1-25.7) | 24.9 (24.5-25.4) | 25.5 (25.2-25.8) | 26.4 (26.1-26.7) | 27.0 (26.2-27.7) |
| Jamaica           | 21.8 (19.9-23.7) | 22.4 (21.5-23.4) | 23.3 (22.7-23.9) | 24.5 (24.0-25.0) | 25.6 (24.5-26.7) |
| Japan             | 22.0 (21.6-22.4) | 22.3 (22.1-22.6) | 22.8 (22.6-23.0) | 23.3 (23.0-23.5) | 23.6 (23.0-24.1) |
| Jordan            | 23.7 (21.7-25.7) | 25.1 (23.9-26.1) | 26.1 (25.3-26.8) | 27.0 (26.6-27.5) | 27.9 (27.0-28.9) |
| Kazakhstan        | 23.4 (21.5-25.4) | 24.4 (23.1-25.6) | 25.1 (23.8-26.4) | 26.0 (24.5-27.4) | 27.1 (25.2-29.0) |
| Kenya             | 19.5 (17.5-21.4) | 20.4 (19.1-21.7) | 21.2 (19.9-22.5) | 21.8 (20.3-23.2) | 22.3 (20.5-24.1) |
| Kiribati          | 24.8 (23.5-26.2) | 26.6 (25.8-27.4) | 27.8 (27.0-28.7) | 28.3 (27.5-29.1) | 28.2 (26.8-29.7) |
| Kuwait            | 25.1 (23.4-26.8) | 26.1 (25.3-26.9) | 27.0 (26.4-27.5) | 27.9 (27.5-28.4) | 28.2 (27.3-29.1) |
| Kyrgyzstan        | 22.6 (20.6-24.7) | 23.4 (22.3-24.4) | 24.1 (23.2-24.9) | 24.7 (23.9-25.5) | 25.6 (24.8-26.5) |
| Lao PDR           | 19.4 (17.2-21.5) | 19.8 (18.3-21.2) | 20.2 (18.9-21.5) | 21.2 (20.3-22.1) | 22.3 (21.5-23.1) |
| Latvia            | 24.2 (22.3-26.1) | 24.8 (23.7-26.0) | 25.1 (24.3-25.9) | 25.8 (25.1-26.5) | 26.8 (25.6-28.1) |
| Lebanon           | 23.8 (21.8-25.8) | 24.8 (23.7-25.9) | 25.8 (25.1-26.5) | 26.8 (26.2-27.4) | 27.6 (26.5-28.6) |
| Lesotho           | 19.8 (17.5-22.0) | 20.5 (19.0-22.0) | 21.2 (19.9-22.5) | 21.9 (21.1-22.8) | 22.7 (22.0-23.5) |
| Liberia           | 21.6 (19.4-23.8) | 22.2 (20.7-23.8) | 22.0 (20.6-23.5) | 22.7 (21.8-23.6) | 23.2 (22.5-23.9) |
| Libya             | 23.6 (21.4-25.7) | 24.9 (23.6-26.2) | 25.6 (24.6-26.6) | 26.1 (25.4-26.9) | 26.4 (25.3-27.4) |
| Lithuania         | 25.0 (23.6-26.4) | 25.5 (24.8-26.2) | 25.7 (25.1-26.2) | 26.4 (25.7-27.0) | 27.4 (26.0-28.8) |
| Luxembourg        | 24.4 (22.7-26.3) | 25.3 (24.0-26.6) | 26.2 (25.1-27.4) | 27.0 (26.2-27.8) | 27.5 (26.4-28.6) |
| Macedonia (TFYR)  | 23.8 (21.2-26.1) | 24.6 (22.5-26.6) | 25.1 (23.2-27.0) | 25.7 (23.8-27.6) | 26.3 (24.2-28.5) |
| Madagascar        | 19.5 (17.4-21.7) | 20.2 (18.8-21.5) | 20.7 (19.6-21.7) | 20.9 (19.9-22.0) | 21.2 (19.6-22.7) |
| Malawi            | 19.9 (17.7-22.0) | 20.6 (19.2-21.9) | 21.2 (20.1-22.2) | 21.8 (21.1-22.5) | 22.3 (21.3-23.4) |
| Malaysia          | 21.1 (19.1-23.1) | 22.0 (20.9-23.0) | 22.9 (22.3-23.5) | 24.1 (23.8-24.4) | 25.1 (24.4-25.9) |
| Maldives          | 20.1 (17.8-22.1) | 20.8 (19.4-22.1) | 21.6 (20.4-22.7) | 22.8 (22.0-23.6) | 24.0 (23.2-24.9) |
| Mali              | 20.2 (18.0-22.5) | 20.7 (19.3-22.1) | 21.2 (20.1-22.3) | 22.0 (21.0-23.1) | 22.8 (21.3-24.3) |
| Malta             | 25.3 (23.5-27.0) | 26.0 (24.9-27.1) | 26.5 (25.4-27.7) | 27.2 (25.9-28.6) | 27.8 (25.9-29.5) |
| Marshall Islands  | 25.4 (23.5-27.4) | 27.0 (25.8-28.3) | 28.2 (27.2-29.1) | 28.2 (27.4-29.1) | 28.1 (26.5-29.6) |
| Mauritania        | 20.6 (18.3-22.9) | 21.3 (19.7-22.9) | 21.9 (20.5-23.2) | 22.5 (21.3-23.7) | 23.1 (21.5-24.7) |
| Mauritius         | 21.4 (19.7-23.0) | 22.4 (21.8-23.1) | 23.5 (23.0-24.0) | 24.3 (23.8-24.8) | 24.8 (23.8-25.8) |
| Mexico            | 23.8 (21.8-25.6) | 24.9 (23.9-25.8) | 25.8 (25.4-26.3) | 26.8 (26.5-27.0) | 27.5 (26.9-28.0) |

|                                  |                  |                  |                  |                  |                  |
|----------------------------------|------------------|------------------|------------------|------------------|------------------|
| Micronesia (Federated States of) | 24.6 (22.8-26.6) | 26.3 (25.0-27.5) | 27.3 (26.3-28.4) | 27.6 (26.9-28.3) | 27.7 (26.6-28.9) |
| Moldova                          | 23.9 (21.7-26.0) | 24.5 (22.9-26.0) | 24.8 (23.3-26.2) | 25.3 (24.2-26.3) | 26.3 (25.5-27.2) |
| Mongolia                         | 22.2 (20.1-24.3) | 23.0 (21.8-24.2) | 23.6 (22.8-24.3) | 24.2 (23.8-24.7) | 25.3 (24.7-25.9) |
| Montenegro                       | 23.7 (21.2-26.2) | 24.8 (22.8-26.8) | 25.4 (23.5-27.3) | 26.1 (24.2-27.9) | 26.7 (24.6-28.8) |
| Morocco                          | 21.8 (19.7-23.8) | 22.7 (21.5-23.9) | 23.5 (22.7-24.4) | 24.3 (23.4-25.1) | 24.8 (23.3-26.4) |
| Mozambique                       | 19.4 (17.1-21.5) | 20.0 (18.6-21.4) | 20.6 (19.5-21.6) | 21.1 (20.4-21.9) | 21.5 (20.2-22.9) |
| Myanmar                          | 19.3 (17.1-21.5) | 19.7 (18.3-21.1) | 20.1 (19.0-21.3) | 21.0 (20.3-21.7) | 22.0 (21.3-22.8) |
| Namibia                          | 20.2 (17.9-22.3) | 20.8 (19.5-22.3) | 21.4 (20.3-22.4) | 22.1 (21.4-22.8) | 22.8 (21.5-24.0) |
| Nauru                            | 30.7 (29.6-31.8) | 32.6 (32.1-33.2) | 33.4 (32.8-34.0) | 32.5 (31.9-33.1) | 31.6 (30.2-33.1) |
| Nepal                            | 19.7 (17.8-21.5) | 20.4 (19.2-21.6) | 21.2 (20.3-22.1) | 22.0 (21.4-22.7) | 22.7 (21.9-23.4) |
| Netherlands                      | 23.2 (21.8-24.6) | 23.9 (23.2-24.6) | 24.7 (24.2-25.2) | 25.5 (25.2-25.9) | 25.9 (25.1-26.6) |
| New Zealand                      | 24.5 (23.1-25.8) | 25.3 (24.7-25.9) | 26.3 (25.8-26.7) | 27.3 (27.0-27.7) | 28.0 (27.5-28.4) |
| Nicaragua                        | 23.2 (20.9-25.3) | 23.9 (22.3-25.5) | 24.4 (23.0-25.8) | 25.3 (24.0-26.5) | 25.9 (24.3-27.6) |
| Niger                            | 19.7 (17.4-21.8) | 20.0 (18.5-21.4) | 20.4 (19.3-21.5) | 20.9 (20.1-21.7) | 21.3 (20.0-22.5) |
| Nigeria                          | 20.1 (18.2-21.9) | 20.8 (20.1-21.6) | 21.3 (20.8-21.9) | 22.0 (21.5-22.5) | 22.7 (21.9-23.6) |
| Niue                             | 26.8 (24.8-28.8) | 28.9 (27.3-30.4) | 30.3 (28.9-31.7) | 30.9 (29.9-31.9) | 31.2 (30.2-32.3) |
| North Korea                      | 21.1 (18.5-23.7) | 21.6 (19.6-23.7) | 21.9 (19.8-23.9) | 21.8 (19.7-24.0) | 22.3 (19.7-24.8) |
| Norway                           | 23.4 (22.1-24.7) | 24.5 (23.8-25.1) | 25.4 (24.8-25.9) | 26.4 (25.8-26.9) | 27.0 (25.9-28.2) |
| Occupied Palestinian Territory   | 24.3 (22.2-26.2) | 25.1 (24.0-26.2) | 25.9 (25.2-26.6) | 26.9 (26.4-27.5) | 27.5 (26.5-28.6) |
| Oman                             | 22.0 (20.0-23.8) | 23.4 (22.5-24.2) | 24.6 (24.0-25.1) | 25.4 (24.9-25.9) | 26.0 (24.9-27.0) |
| Pakistan                         | 20.0 (18.3-21.7) | 20.8 (19.9-21.7) | 21.6 (21.1-22.2) | 22.6 (22.0-23.2) | 23.4 (22.2-24.7) |
| Palau                            | 27.0 (25.0-29.3) | 28.7 (27.1-30.3) | 29.7 (28.2-31.3) | 29.8 (28.7-30.9) | 29.4 (28.5-30.3) |
| Panama                           | 22.8 (20.7-25.0) | 23.8 (22.4-25.1) | 24.6 (23.6-25.6) | 25.5 (24.7-26.3) | 26.4 (25.2-27.5) |
| Papua New Guinea                 | 21.7 (19.7-23.6) | 22.7 (21.6-23.9) | 23.8 (22.8-24.8) | 24.4 (23.6-25.1) | 24.9 (23.6-26.1) |
| Paraguay                         | 22.4 (19.9-25.0) | 23.3 (21.3-25.4) | 24.3 (22.3-26.3) | 25.2 (23.2-27.2) | 26.0 (23.8-28.2) |
| Peru                             | 22.5 (20.3-24.6) | 23.2 (21.8-24.6) | 23.8 (22.9-24.8) | 24.8 (24.3-25.3) | 25.9 (25.1-26.8) |
| Philippines                      | 20.8 (19.0-22.7) | 21.3 (20.5-22.2) | 21.7 (21.2-22.2) | 22.3 (21.9-22.8) | 23.1 (22.0-24.2) |
| Poland                           | 24.4 (22.9-25.8) | 25.0 (24.5-25.6) | 25.4 (24.9-25.8) | 26.1 (25.8-26.4) | 26.9 (26.3-27.7) |
| Portugal                         | 23.6 (22.2-25.0) | 24.3 (23.8-24.8) | 25.1 (24.7-25.5) | 26.1 (25.7-26.5) | 26.8 (25.8-27.8) |
| Puerto Rico                      | 24.2 (22.2-26.3) | 25.4 (24.0-26.8) | 26.5 (25.4-27.6) | 27.5 (26.6-28.4) | 28.2 (26.9-29.6) |
| Qatar                            | 24.4 (22.3-26.4) | 26.0 (24.6-27.3) | 26.7 (25.7-27.8) | 27.8 (27.1-28.4) | 28.5 (27.7-29.3) |
| Romania                          | 23.3 (21.6-25.1) | 24.2 (23.3-25.1) | 24.6 (23.9-25.3) | 25.3 (24.5-26.0) | 26.2 (24.8-27.6) |
| Russian Federation               | 24.0 (22.5-25.5) | 24.5 (24.0-25.0) | 24.7 (24.5-25.0) | 25.3 (25.0-25.6) | 26.2 (25.2-27.2) |
| Rwanda                           | 18.7 (16.4-20.9) | 19.5 (17.8-21.1) | 20.1 (18.8-21.4) | 20.7 (19.9-21.5) | 21.3 (20.6-22.0) |
| Saint Kitts and Nevis            | 23.5 (21.4-25.6) | 24.6 (23.0-26.1) | 25.7 (24.4-27.1) | 27.1 (25.9-28.3) | 28.2 (26.6-29.8) |
| Saint Lucia                      | 22.7 (21.3-24.1) | 23.5 (22.7-24.3) | 24.9 (23.8-25.8) | 26.9 (26.0-27.7) | 29.1 (28.1-30.0) |
| Saint Vincent and the Grenadines | 22.0 (19.5-24.5) | 22.9 (20.9-24.8) | 23.9 (22.0-25.9) | 25.1 (23.3-27.0) | 26.2 (24.1-28.3) |
| Samoa                            | 25.5 (24.2-26.7) | 27.2 (26.6-27.8) | 28.6 (28.1-29.2) | 29.5 (29.0-30.0) | 30.1 (29.4-30.8) |
| Sao Tome and Principe            | 21.4 (19.2-23.5) | 21.9 (20.4-23.3) | 22.4 (21.3-23.6) | 23.2 (22.5-23.9) | 23.9 (23.0-24.8) |
| Saudi Arabia                     | 23.9 (22.2-25.6) | 25.4 (24.8-26.0) | 26.4 (26.1-26.7) | 27.1 (26.7-27.4) | 27.5 (26.9-28.2) |
| Senegal                          | 19.9 (18.0-21.7) | 20.4 (19.2-21.5) | 20.8 (19.7-21.8) | 21.4 (20.5-22.2) | 21.8 (20.9-22.7) |
| Serbia                           | 23.8 (22.2-25.4) | 24.8 (24.0-25.6) | 25.4 (24.8-26.0) | 25.9 (25.4-26.3) | 26.3 (25.8-26.8) |
| Seychelles                       | 21.5 (19.7-23.3) | 22.6 (21.8-23.4) | 23.7 (23.2-24.2) | 24.7 (24.2-25.2) | 25.5 (24.7-26.2) |
| Sierra Leone                     | 20.4 (18.2-22.5) | 20.9 (19.4-22.4) | 21.2 (20.0-22.4) | 21.5 (20.7-22.4) | 22.0 (21.3-22.7) |
| Singapore                        | 21.9 (20.6-23.3) | 22.8 (22.2-23.3) | 23.4 (23.0-23.8) | 23.8 (23.4-24.2) | 24.2 (23.6-24.9) |
| Slovakia                         | 24.1 (22.4-25.9) | 25.1 (24.3-26.0) | 25.8 (25.3-26.4) | 26.4 (26.0-26.8) | 27.1 (26.4-27.9) |
| Slovenia                         | 23.5 (21.3-25.7) | 24.5 (22.9-26.1) | 25.3 (23.8-26.8) | 26.1 (24.7-27.4) | 26.6 (25.2-28.1) |
| Solomon Islands                  | 21.7 (19.5-24.0) | 23.0 (21.5-24.6) | 24.0 (22.8-25.3) | 24.2 (23.3-25.1) | 24.2 (23.0-25.3) |
| Somalia                          | 20.0 (17.5-22.5) | 20.5 (18.5-22.6) | 20.9 (19.0-22.9) | 21.1 (19.2-23.1) | 21.3 (19.0-23.5) |
| South Africa                     | 22.4 (20.5-24.3) | 23.2 (22.2-24.1) | 23.8 (23.2-24.3) | 24.4 (24.1-24.7) | 24.8 (24.3-25.4) |
| South Korea                      | 20.4 (18.7-22.0) | 21.8 (21.1-22.5) | 23.0 (22.5-23.4) | 23.7 (23.4-24.0) | 24.2 (23.7-24.7) |
| Spain                            | 24.3 (22.7-25.8) | 25.1 (24.6-25.7) | 26.0 (25.6-26.3) | 26.9 (26.6-27.2) | 27.5 (26.5-28.4) |
| Sri Lanka                        | 19.4 (17.4-21.3) | 19.9 (18.6-21.0) | 20.5 (19.7-21.3) | 21.5 (20.9-22.0) | 22.6 (21.4-23.8) |
| Sudan                            | 20.7 (18.5-22.7) | 21.5 (20.2-22.8) | 22.3 (21.3-23.4) | 23.1 (22.3-23.8) | 23.6 (22.2-24.9) |
| Suriname                         | 22.8 (20.3-25.3) | 23.8 (21.8-25.7) | 24.4 (22.4-26.2) | 25.3 (23.4-27.1) | 26.2 (24.0-28.4) |
| Swaziland                        | 20.6 (18.4-22.7) | 21.6 (20.1-23.0) | 22.5 (21.3-23.6) | 23.3 (22.5-24.1) | 24.0 (22.7-25.2) |
| Sweden                           | 23.3 (22.9-23.8) | 24.2 (23.9-24.6) | 25.1 (24.8-25.4) | 26.1 (25.8-26.4) | 26.7 (25.8-27.5) |
| Switzerland                      | 23.9 (22.5-25.5) | 24.7 (23.9-25.5) | 25.4 (24.8-26.0) | 25.9 (25.4-26.4) | 26.5 (25.8-27.2) |
| Syrian Arab Republic             | 23.3 (21.2-25.3) | 24.5 (23.3-25.7) | 25.5 (24.6-26.4) | 26.3 (25.5-27.1) | 26.6 (25.2-28.0) |

|                          |                  |                  |                  |                  |                  |
|--------------------------|------------------|------------------|------------------|------------------|------------------|
| Taiwan                   | 21.2 (19.4-22.8) | 22.2 (21.4-23.0) | 23.1 (22.7-23.6) | 24.0 (23.6-24.4) | 24.9 (23.8-25.9) |
| Tajikistan               | 22.9 (20.3-25.4) | 23.6 (21.6-25.6) | 24.0 (22.1-25.9) | 24.3 (22.4-26.2) | 25.2 (23.1-27.4) |
| Tanzania                 | 20.0 (18.0-22.1) | 20.9 (19.6-22.0) | 21.5 (20.6-22.4) | 21.9 (21.3-22.6) | 22.3 (21.5-23.0) |
| Thailand                 | 20.1 (18.3-21.8) | 20.9 (20.2-21.6) | 21.8 (21.5-22.2) | 22.7 (22.3-23.1) | 23.5 (22.5-24.4) |
| Timor-Leste              | 18.5 (16.3-20.7) | 18.8 (17.2-20.5) | 19.3 (17.8-20.8) | 19.7 (18.4-21.1) | 20.3 (18.9-21.8) |
| Togo                     | 20.3 (18.1-22.4) | 20.8 (19.3-22.3) | 21.3 (20.0-22.5) | 22.0 (21.1-22.8) | 22.5 (21.5-23.5) |
| Tokelau                  | 27.2 (25.1-29.4) | 29.2 (27.7-30.7) | 30.6 (29.4-31.9) | 31.2 (30.3-32.1) | 31.5 (30.0-32.9) |
| Tonga                    | 26.6 (24.8-28.6) | 28.5 (27.3-29.8) | 29.8 (28.8-30.9) | 30.2 (29.6-30.9) | 30.2 (29.2-31.1) |
| Trinidad and Tobago      | 23.0 (21.0-25.0) | 24.0 (22.9-25.2) | 24.8 (23.9-25.6) | 26.1 (25.1-27.1) | 27.4 (25.7-29.2) |
| Tunisia                  | 21.6 (19.7-23.6) | 22.6 (21.6-23.6) | 23.5 (23.0-24.1) | 24.5 (24.0-25.0) | 25.1 (24.0-26.2) |
| Turkey                   | 22.8 (21.0-24.5) | 24.0 (23.2-24.8) | 25.3 (24.9-25.7) | 26.3 (26.1-26.6) | 26.8 (26.3-27.4) |
| Turkmenistan             | 23.0 (20.7-25.2) | 23.7 (22.1-25.2) | 24.5 (23.1-25.9) | 25.2 (24.1-26.2) | 26.3 (25.5-27.1) |
| Tuvalu                   | 26.0 (24.7-27.3) | 27.7 (26.4-29.0) | 29.1 (27.6-30.6) | 29.3 (27.8-30.9) | 29.2 (27.3-31.1) |
| Uganda                   | 19.0 (16.9-21.1) | 19.5 (18.2-21.0) | 20.1 (19.0-21.2) | 20.8 (20.1-21.4) | 21.4 (20.6-22.2) |
| Ukraine                  | 24.2 (21.7-26.7) | 24.8 (22.9-26.8) | 25.1 (23.3-27.1) | 25.5 (23.7-27.4) | 26.3 (24.0-28.5) |
| United Arab Emirates     | 24.7 (22.4-26.8) | 25.6 (24.4-26.7) | 26.4 (25.7-27.1) | 27.3 (26.5-28.1) | 27.4 (25.9-28.9) |
| United Kingdom           | 24.1 (23.0-25.2) | 24.8 (24.5-25.2) | 25.8 (25.6-26.0) | 26.9 (26.7-27.1) | 27.4 (27.0-27.8) |
| United States of America | 25.2 (24.6-25.8) | 25.9 (25.5-26.3) | 27.0 (26.7-27.4) | 28.2 (27.9-28.4) | 28.9 (28.4-29.5) |
| Uruguay                  | 23.9 (21.8-26.0) | 24.5 (23.2-25.8) | 25.1 (24.1-26.2) | 25.9 (25.2-26.7) | 26.8 (25.7-28.0) |
| Uzbekistan               | 22.7 (20.5-24.8) | 23.5 (22.2-24.8) | 24.2 (23.2-25.1) | 24.8 (24.0-25.6) | 25.8 (24.3-27.3) |
| Vanuatu                  | 22.7 (20.7-24.8) | 23.9 (22.7-25.1) | 24.9 (24.1-25.6) | 25.3 (24.7-25.9) | 25.3 (24.4-26.2) |
| Venezuela                | 24.1 (22.0-26.2) | 25.0 (23.8-26.3) | 25.8 (24.9-26.7) | 26.5 (25.9-27.2) | 27.3 (26.2-28.4) |
| Viet Nam                 | 18.7 (17.1-20.2) | 19.0 (18.5-19.6) | 19.5 (19.2-19.9) | 20.4 (20.1-20.7) | 21.2 (20.5-21.8) |
| Yemen                    | 20.8 (18.7-22.9) | 21.7 (20.4-23.1) | 22.5 (21.5-23.6) | 23.1 (22.4-23.9) | 23.4 (22.2-24.6) |
| Zambia                   | 19.5 (17.3-21.7) | 20.1 (18.7-21.6) | 20.5 (19.3-21.7) | 20.8 (19.8-21.8) | 21.3 (19.9-22.7) |
| Zimbabwe                 | 20.5 (18.6-22.4) | 21.2 (20.3-22.2) | 21.6 (20.9-22.4) | 21.9 (21.4-22.5) | 22.0 (21.1-22.9) |

## Women

| Country                  | Year             |                  |                  |                  |                  |
|--------------------------|------------------|------------------|------------------|------------------|------------------|
|                          | 1975             | 1985             | 1995             | 2005             | 2014             |
| Afghanistan              | 19.4 (16.5-22.2) | 20.5 (18.3-22.7) | 21.5 (19.8-23.1) | 22.5 (21.3-23.7) | 23.7 (22.5-24.8) |
| Albania                  | 24.1 (21.4-26.7) | 24.5 (22.7-26.4) | 24.8 (23.5-26.0) | 25.4 (24.5-26.2) | 25.7 (24.6-26.8) |
| Algeria                  | 23.3 (20.7-25.8) | 24.2 (22.5-25.9) | 24.9 (23.8-26.0) | 25.5 (24.7-26.4) | 26.0 (24.7-27.2) |
| American Samoa           | 32.2 (31.2-33.1) | 33.4 (32.7-34.0) | 34.3 (33.7-35.0) | 34.7 (33.9-35.6) | 34.8 (33.2-36.3) |
| Andorra                  | 26.2 (22.8-29.7) | 26.5 (23.6-29.4) | 26.5 (23.8-29.2) | 26.7 (23.9-29.4) | 26.6 (23.6-29.7) |
| Angola                   | 19.6 (16.0-23.1) | 20.7 (17.6-23.7) | 21.8 (18.9-24.6) | 22.9 (20.1-25.8) | 24.1 (21.0-27.2) |
| Antigua and Barbuda      | 24.2 (20.9-27.5) | 25.5 (22.5-28.3) | 26.9 (24.1-29.6) | 28.0 (25.3-30.9) | 29.1 (26.1-32.2) |
| Argentina                | 23.6 (21.8-25.5) | 24.6 (23.5-25.7) | 25.5 (24.7-26.3) | 26.4 (25.7-27.0) | 27.2 (26.2-28.3) |
| Armenia                  | 24.4 (21.7-27.0) | 25.3 (23.6-26.9) | 25.8 (24.7-26.7) | 26.6 (25.6-27.4) | 27.4 (25.8-28.9) |
| Australia                | 23.4 (22.6-24.2) | 24.3 (23.9-24.7) | 25.3 (24.9-25.6) | 26.2 (25.9-26.6) | 26.8 (26.2-27.4) |
| Austria                  | 23.9 (22.4-25.4) | 24.0 (23.0-25.0) | 24.1 (23.3-24.9) | 24.4 (23.3-25.4) | 24.5 (22.8-26.1) |
| Azerbaijan               | 24.2 (21.7-26.8) | 25.2 (23.5-26.8) | 25.8 (24.7-26.8) | 26.7 (25.7-27.6) | 27.9 (26.5-29.4) |
| Bahamas                  | 25.6 (22.3-29.0) | 26.6 (23.8-29.6) | 27.5 (24.8-30.2) | 28.3 (25.6-31.1) | 28.9 (25.8-31.9) |
| Bahrain                  | 26.5 (24.1-29.1) | 26.2 (24.8-27.7) | 26.1 (25.3-27.0) | 25.7 (24.9-26.4) | 25.1 (23.7-26.4) |
| Bangladesh               | 17.2 (15.3-19.1) | 18.2 (17.1-19.3) | 19.2 (18.7-19.8) | 20.4 (20.0-20.7) | 21.4 (20.6-22.2) |
| Barbados                 | 25.5 (23.6-27.5) | 26.4 (25.3-27.6) | 27.2 (26.3-28.1) | 28.1 (27.0-29.3) | 29.0 (27.1-30.9) |
| Belarus                  | 24.6 (21.1-28.1) | 25.4 (22.5-28.3) | 25.8 (23.1-28.5) | 26.2 (23.5-28.9) | 26.6 (23.5-29.6) |
| Belgium                  | 24.9 (23.7-26.2) | 25.0 (24.4-25.5) | 25.0 (24.6-25.4) | 25.1 (24.5-25.8) | 25.1 (24.1-26.2) |
| Belize                   | 25.4 (22.6-28.0) | 26.6 (24.7-28.4) | 27.8 (26.6-29.1) | 29.2 (28.1-30.2) | 30.2 (28.8-31.6) |
| Benin                    | 18.8 (16.5-21.0) | 20.3 (18.9-21.6) | 21.6 (20.8-22.4) | 23.1 (22.5-23.6) | 24.2 (23.4-25.0) |
| Bermuda                  | 26.8 (23.2-30.4) | 27.4 (24.3-30.4) | 27.9 (25.0-30.8) | 28.5 (25.7-31.3) | 29.2 (26.2-32.3) |
| Bhutan                   | 19.0 (16.0-21.8) | 20.3 (18.2-22.4) | 21.8 (20.3-23.2) | 23.1 (22.1-24.1) | 24.2 (23.3-25.0) |
| Bolivia                  | 22.4 (20.1-24.7) | 23.7 (22.4-25.1) | 25.0 (24.2-25.9) | 26.3 (25.5-27.1) | 27.4 (26.1-28.7) |
| Bosnia and Herzegovina   | 22.3 (19.4-25.1) | 22.9 (20.9-24.9) | 23.5 (22.1-24.8) | 24.5 (23.5-25.6) | 24.6 (23.5-25.7) |
| Botswana                 | 22.2 (19.3-25.1) | 23.6 (21.6-25.7) | 25.0 (23.7-26.4) | 25.8 (24.8-26.8) | 26.4 (25.2-27.7) |
| Brazil                   | 22.7 (21.0-24.3) | 23.9 (23.1-24.7) | 24.7 (24.3-25.1) | 25.4 (25.1-25.7) | 26.1 (25.3-26.7) |
| Brunei Darussalam        | 24.4 (20.7-28.2) | 25.1 (21.9-28.2) | 25.6 (22.7-28.5) | 26.0 (23.2-28.9) | 26.1 (23.0-29.3) |
| Bulgaria                 | 24.3 (21.7-26.8) | 24.8 (23.1-26.5) | 25.0 (23.8-26.1) | 25.1 (24.1-26.0) | 25.2 (23.8-26.7) |
| Burkina Faso             | 18.4 (16.5-20.4) | 19.4 (18.3-20.5) | 20.3 (19.7-20.9) | 21.4 (20.9-21.8) | 22.0 (21.3-22.7) |
| Burundi                  | 17.7 (14.7-20.7) | 18.8 (16.6-20.9) | 19.8 (18.3-21.4) | 20.6 (19.5-21.8) | 21.4 (20.1-22.6) |
| Cabo Verde               | 19.7 (17.0-22.5) | 21.3 (19.5-23.2) | 22.8 (21.5-24.2) | 24.4 (23.4-25.5) | 25.3 (24.0-26.6) |
| Cambodia                 | 17.9 (15.4-20.3) | 18.9 (17.4-20.5) | 20.1 (19.1-21.0) | 21.0 (20.5-21.6) | 21.9 (21.0-22.7) |
| Cameroon                 | 20.3 (18.1-22.5) | 21.8 (20.4-23.1) | 22.9 (22.2-23.6) | 24.1 (23.6-24.6) | 25.0 (24.2-25.8) |
| Canada                   | 23.3 (22.3-24.3) | 24.4 (23.8-24.9) | 25.4 (25.0-25.9) | 26.3 (25.8-26.7) | 26.7 (25.8-27.5) |
| Central African Republic | 19.2 (16.9-21.5) | 20.2 (18.8-21.6) | 21.2 (20.2-22.2) | 22.3 (21.2-23.4) | 23.3 (21.7-25.0) |
| Chad                     | 18.3 (16.0-20.5) | 19.2 (17.8-20.6) | 20.3 (19.3-21.1) | 21.5 (20.6-22.3) | 22.6 (21.2-23.9) |
| Chile                    | 24.8 (22.5-27.2) | 25.7 (24.2-27.2) | 26.6 (25.8-27.5) | 27.4 (26.8-27.9) | 28.0 (27.1-28.9) |
| China                    | 21.4 (20.4-22.5) | 21.8 (21.4-22.2) | 22.2 (22.0-22.5) | 22.8 (22.6-23.1) | 23.4 (22.8-23.9) |
| China (Hong Kong SAR)    | 22.3 (20.1-24.5) | 22.7 (21.4-23.9) | 22.9 (22.1-23.7) | 22.8 (21.5-24.1) | 22.8 (20.6-25.0) |
| Colombia                 | 22.7 (20.7-24.7) | 24.0 (22.9-25.2) | 25.1 (24.5-25.7) | 25.9 (25.5-26.3) | 26.4 (25.6-27.2) |
| Comoros                  | 20.2 (17.6-22.5) | 21.3 (19.7-22.7) | 22.5 (21.5-23.4) | 23.8 (23.1-24.5) | 25.1 (24.2-26.0) |
| Congo                    | 19.7 (18.1-21.2) | 21.1 (20.4-21.9) | 22.2 (21.6-22.8) | 23.2 (22.6-23.8) | 24.0 (23.0-24.9) |
| Cook Islands             | 28.7 (26.1-31.2) | 30.2 (28.5-32.0) | 31.5 (30.3-32.8) | 32.2 (31.1-33.4) | 32.5 (30.9-34.1) |
| Costa Rica               | 21.9 (19.2-24.6) | 23.4 (21.6-25.3) | 24.9 (23.7-26.1) | 26.2 (25.4-27.0) | 27.0 (26.1-27.9) |
| Cote d'Ivoire            | 20.5 (18.3-22.7) | 21.5 (20.2-22.8) | 22.4 (21.6-23.1) | 23.3 (22.7-23.9) | 24.0 (23.0-24.9) |
| Croatia                  | 23.2 (20.8-25.5) | 24.0 (22.5-25.4) | 24.4 (23.3-25.3) | 24.8 (23.7-25.8) | 25.2 (23.5-26.8) |
| Cuba                     | 23.3 (21.5-25.1) | 24.4 (23.2-25.5) | 24.9 (24.1-25.7) | 25.4 (24.8-26.0) | 26.0 (25.1-26.9) |
| Cyprus                   | 23.2 (20.5-25.7) | 24.6 (22.9-26.4) | 25.5 (24.4-26.8) | 26.1 (25.0-27.4) | 26.4 (24.7-28.2) |
| Czech Republic           | 26.3 (24.8-27.7) | 26.5 (25.8-27.2) | 26.2 (25.7-26.8) | 26.0 (25.4-26.7) | 25.8 (24.7-26.9) |
| Denmark                  | 24.2 (23.0-25.4) | 24.3 (23.6-25.1) | 24.4 (23.8-25.0) | 24.5 (23.8-25.1) | 24.5 (23.4-25.5) |
| Djibouti                 | 22.5 (19.1-25.9) | 22.7 (19.7-25.6) | 23.2 (20.4-26.0) | 23.4 (20.6-26.3) | 23.7 (20.7-26.8) |
| Dominica                 | 24.0 (21.3-26.6) | 25.3 (23.3-27.2) | 26.7 (25.3-28.1) | 27.7 (26.7-28.9) | 28.8 (27.4-30.1) |
| Dominican Republic       | 22.0 (20.2-23.8) | 23.6 (22.7-24.5) | 24.8 (24.4-25.3) | 26.2 (25.6-26.9) | 27.1 (26.2-28.1) |
| DR Congo                 | 19.0 (16.6-21.6) | 19.9 (18.3-21.6) | 20.8 (19.8-21.8) | 21.5 (20.9-22.1) | 22.5 (21.7-23.3) |
| Ecuador                  | 22.5 (19.6-25.4) | 24.0 (22.1-25.9) | 25.3 (24.0-26.7) | 26.5 (25.7-27.3) | 27.6 (26.6-28.5) |
| Egypt                    | 26.0 (24.2-27.8) | 27.4 (26.5-28.2) | 28.5 (28.1-28.9) | 29.6 (29.3-29.9) | 30.6 (30.0-31.2) |

|                   |                  |                  |                  |                  |                  |
|-------------------|------------------|------------------|------------------|------------------|------------------|
| El Salvador       | 22.7 (20.1-25.3) | 24.1 (22.4-25.8) | 25.6 (24.6-26.7) | 27.0 (26.3-27.7) | 28.0 (26.9-29.1) |
| Equatorial Guinea | 19.6 (16.6-22.6) | 20.9 (18.6-23.1) | 22.2 (20.4-23.9) | 24.7 (23.5-25.9) | 25.8 (24.5-27.1) |
| Eritrea           | 18.4 (16.3-20.5) | 19.0 (17.7-20.2) | 19.7 (19.1-20.4) | 20.5 (20.0-21.0) | 21.0 (20.0-21.9) |
| Estonia           | 24.7 (22.8-26.7) | 25.0 (24.0-26.1) | 25.1 (24.5-25.6) | 25.5 (25.2-25.8) | 25.8 (25.2-26.3) |
| Ethiopia          | 18.5 (16.1-21.0) | 19.1 (17.5-20.7) | 19.7 (18.8-20.6) | 20.3 (19.7-21.0) | 21.0 (20.0-21.9) |
| Fiji              | 24.6 (21.9-27.3) | 25.9 (24.1-27.7) | 27.0 (25.9-28.1) | 28.0 (27.4-28.6) | 28.6 (27.7-29.4) |
| Finland           | 23.6 (22.4-24.8) | 24.4 (23.8-25.0) | 25.1 (24.7-25.4) | 25.4 (25.1-25.7) | 25.4 (24.9-26.0) |
| France            | 24.2 (22.6-25.8) | 24.2 (23.4-25.1) | 24.3 (23.7-24.9) | 24.4 (23.9-25.0) | 24.4 (23.4-25.3) |
| French Polynesia  | 28.2 (25.3-31.3) | 29.0 (26.8-31.3) | 29.5 (27.9-31.2) | 29.6 (28.5-30.7) | 29.6 (28.4-30.7) |
| Gabon             | 20.8 (17.9-23.5) | 22.7 (20.8-24.4) | 23.9 (22.7-25.1) | 25.2 (24.2-26.0) | 26.2 (25.0-27.2) |
| Gambia            | 19.2 (17.0-21.5) | 20.6 (19.2-22.0) | 22.0 (21.2-22.8) | 23.4 (22.8-23.9) | 24.4 (23.6-25.1) |
| Georgia           | 23.7 (20.7-26.8) | 24.9 (22.7-27.1) | 25.3 (23.8-26.8) | 26.2 (25.2-27.2) | 27.2 (26.1-28.2) |
| Germany           | 24.1 (23.0-25.2) | 24.5 (24.0-24.9) | 24.9 (24.5-25.2) | 25.3 (24.8-25.7) | 25.6 (24.7-26.4) |
| Ghana             | 20.2 (18.1-22.1) | 21.3 (20.1-22.4) | 22.6 (22.0-23.2) | 23.9 (23.5-24.3) | 24.9 (24.0-25.8) |
| Greece            | 25.6 (23.4-27.9) | 26.1 (24.8-27.4) | 26.4 (25.6-27.2) | 26.9 (25.9-27.8) | 27.1 (25.5-28.7) |
| Greenland         | 24.9 (22.5-27.4) | 25.5 (23.8-27.3) | 25.9 (24.6-27.2) | 26.3 (25.4-27.2) | 26.5 (25.4-27.7) |
| Grenada           | 23.0 (20.2-25.8) | 24.4 (22.4-26.5) | 25.9 (24.3-27.4) | 27.3 (26.2-28.5) | 28.6 (27.4-29.7) |
| Guatemala         | 21.8 (19.6-24.0) | 23.3 (22.1-24.6) | 24.8 (24.1-25.5) | 26.2 (25.6-26.8) | 27.3 (26.2-28.3) |
| Guinea            | 19.0 (16.6-21.3) | 20.4 (18.9-21.9) | 21.4 (20.5-22.4) | 22.5 (21.8-23.3) | 23.3 (22.4-24.3) |
| Guinea Bissau     | 19.5 (16.7-22.3) | 20.7 (18.7-22.7) | 22.0 (20.5-23.6) | 23.1 (21.9-24.2) | 23.8 (22.5-25.1) |
| Guyana            | 22.6 (19.8-25.4) | 23.8 (21.8-25.8) | 25.0 (23.5-26.5) | 26.4 (25.3-27.5) | 27.5 (26.3-28.8) |
| Haiti             | 19.3 (17.1-21.5) | 20.5 (19.1-21.9) | 21.6 (20.8-22.6) | 22.9 (22.2-23.7) | 23.9 (22.9-25.0) |
| Honduras          | 20.6 (18.2-22.9) | 22.4 (21.0-23.8) | 24.1 (23.3-25.0) | 25.9 (25.3-26.5) | 27.3 (26.4-28.2) |
| Hungary           | 24.6 (23.2-26.2) | 25.1 (24.4-25.8) | 25.2 (24.3-26.1) | 25.4 (24.0-26.9) | 25.5 (23.4-27.8) |
| Iceland           | 23.7 (22.2-25.2) | 24.4 (23.6-25.2) | 24.7 (23.8-25.6) | 25.0 (23.7-26.4) | 25.2 (23.2-27.2) |
| India             | 18.8 (17.8-19.6) | 19.6 (19.1-20.1) | 20.4 (20.0-20.7) | 21.0 (20.8-21.3) | 21.5 (21.0-22.1) |
| Indonesia         | 19.0 (17.2-20.9) | 20.3 (19.4-21.3) | 21.6 (21.1-22.1) | 22.6 (22.2-23.0) | 23.4 (22.7-24.1) |
| Iran              | 23.8 (21.7-25.9) | 24.7 (23.5-25.9) | 25.4 (24.8-26.0) | 26.3 (26.0-26.5) | 27.0 (26.4-27.7) |
| Iraq              | 26.2 (23.5-28.8) | 27.1 (25.2-28.9) | 27.4 (26.1-28.7) | 28.0 (27.0-29.0) | 28.7 (27.4-30.1) |
| Ireland           | 22.4 (20.5-24.5) | 23.8 (22.6-25.0) | 25.1 (24.4-25.8) | 26.4 (25.9-26.8) | 27.0 (26.1-27.8) |
| Israel            | 24.7 (22.6-26.8) | 25.3 (24.1-26.5) | 25.9 (25.2-26.6) | 26.3 (25.7-26.9) | 26.7 (25.4-27.9) |
| Italy             | 24.3 (23.1-25.7) | 24.5 (23.9-25.0) | 24.6 (24.3-25.0) | 24.9 (24.5-25.2) | 25.1 (24.4-25.9) |
| Jamaica           | 23.5 (21.3-25.7) | 24.8 (23.5-26.1) | 26.3 (25.6-27.0) | 27.8 (27.2-28.4) | 29.2 (28.1-30.3) |
| Japan             | 22.0 (21.6-22.4) | 22.1 (21.8-22.3) | 22.1 (21.9-22.3) | 22.0 (21.8-22.2) | 21.7 (21.2-22.2) |
| Jordan            | 26.7 (24.5-28.8) | 28.0 (26.8-29.3) | 28.8 (28.2-29.4) | 29.3 (28.9-29.6) | 29.6 (29.0-30.3) |
| Kazakhstan        | 24.0 (21.5-26.5) | 25.0 (23.5-26.5) | 25.8 (24.8-26.7) | 26.6 (25.3-27.7) | 27.3 (25.3-29.2) |
| Kenya             | 19.7 (17.7-21.5) | 20.9 (19.8-22.0) | 22.0 (21.3-22.8) | 23.0 (22.3-23.8) | 24.0 (22.9-25.1) |
| Kiribati          | 24.9 (23.3-26.4) | 26.6 (25.6-27.6) | 28.3 (27.4-29.2) | 29.8 (28.9-30.8) | 30.8 (29.2-32.3) |
| Kuwait            | 28.7 (26.5-31.1) | 29.0 (27.6-30.3) | 29.3 (28.6-30.1) | 29.9 (29.4-30.4) | 30.3 (29.4-31.1) |
| Kyrgyzstan        | 21.9 (19.7-24.1) | 23.2 (21.9-24.5) | 24.4 (23.6-25.2) | 25.6 (24.9-26.4) | 26.9 (26.1-27.7) |
| Lao PDR           | 18.6 (16.0-21.3) | 19.6 (17.7-21.4) | 20.6 (19.3-21.9) | 21.7 (20.9-22.6) | 22.7 (21.8-23.5) |
| Latvia            | 24.4 (22.0-26.7) | 25.0 (23.5-26.5) | 25.1 (24.2-26.1) | 25.5 (24.7-26.4) | 26.0 (24.7-27.3) |
| Lebanon           | 24.4 (22.1-26.6) | 25.3 (23.9-26.8) | 25.9 (25.1-26.8) | 26.6 (25.9-27.3) | 27.2 (26.1-28.3) |
| Lesotho           | 23.9 (21.7-26.2) | 24.7 (23.4-26.1) | 25.6 (24.7-26.4) | 26.4 (25.6-27.0) | 27.0 (26.1-27.8) |
| Liberia           | 20.3 (17.5-23.0) | 21.7 (19.7-23.5) | 22.1 (20.6-23.5) | 23.5 (22.5-24.3) | 24.9 (23.9-25.7) |
| Libya             | 26.4 (23.7-29.0) | 27.4 (25.7-29.2) | 27.9 (26.6-29.0) | 28.4 (27.4-29.3) | 28.8 (27.7-30.0) |
| Lithuania         | 25.6 (23.7-27.5) | 26.0 (24.9-27.0) | 25.9 (25.2-26.5) | 25.9 (25.2-26.6) | 26.1 (24.7-27.5) |
| Luxembourg        | 23.8 (21.2-26.3) | 24.2 (22.4-26.1) | 24.7 (23.3-26.2) | 25.2 (24.3-26.3) | 25.4 (24.2-26.7) |
| Macedonia (TFYR)  | 24.5 (21.9-27.0) | 25.0 (23.2-26.7) | 25.2 (23.9-26.5) | 25.3 (23.9-26.7) | 25.4 (23.5-27.4) |
| Madagascar        | 19.4 (17.1-21.7) | 19.9 (18.5-21.3) | 20.3 (19.6-21.1) | 20.7 (20.1-21.3) | 21.0 (20.0-22.0) |
| Malawi            | 19.6 (17.6-21.5) | 20.6 (19.5-21.7) | 21.5 (20.9-22.1) | 22.4 (21.9-22.9) | 23.2 (22.4-24.0) |
| Malaysia          | 20.5 (18.3-22.7) | 22.1 (20.8-23.4) | 23.5 (22.8-24.2) | 24.8 (24.5-25.2) | 25.7 (25.0-26.5) |
| Maldives          | 20.4 (17.8-22.7) | 22.1 (20.4-23.7) | 23.4 (22.4-24.4) | 24.7 (24.0-25.3) | 25.4 (24.6-26.3) |
| Mali              | 18.4 (16.3-20.6) | 19.7 (18.3-20.9) | 20.8 (19.9-21.6) | 22.1 (21.3-22.7) | 22.9 (22.0-23.8) |
| Malta             | 26.1 (24.1-28.1) | 26.5 (25.1-28.0) | 26.6 (25.1-28.1) | 26.8 (24.9-28.6) | 26.7 (24.2-29.2) |
| Marshall Islands  | 27.3 (24.8-29.8) | 28.4 (26.7-30.1) | 29.5 (28.3-30.6) | 30.0 (28.9-31.0) | 30.2 (28.4-31.9) |
| Mauritania        | 21.6 (19.0-24.1) | 23.1 (21.3-24.7) | 24.4 (23.2-25.4) | 25.4 (24.4-26.4) | 26.3 (24.7-27.8) |
| Mauritius         | 22.9 (21.2-24.5) | 23.7 (22.9-24.5) | 24.7 (24.1-25.2) | 25.4 (24.8-26.1) | 26.0 (25.0-27.1) |
| Mexico            | 22.9 (21.1-24.6) | 24.7 (23.8-25.6) | 26.3 (25.9-26.8) | 27.7 (27.4-28.0) | 28.6 (28.0-29.2) |



|                                  |                  |                  |                  |                  |                  |
|----------------------------------|------------------|------------------|------------------|------------------|------------------|
| Micronesia (Federated States of) | 27.3 (24.8-29.8) | 28.6 (26.8-30.3) | 29.7 (28.5-30.9) | 30.6 (29.7-31.4) | 31.2 (30.0-32.4) |
| Moldova                          | 24.9 (22.2-27.6) | 25.7 (23.9-27.6) | 26.1 (24.8-27.4) | 26.6 (25.8-27.5) | 27.3 (26.4-28.2) |
| Mongolia                         | 22.4 (20.0-25.0) | 23.6 (22.0-25.2) | 24.4 (23.5-25.3) | 25.2 (24.7-25.7) | 26.1 (25.4-26.9) |
| Montenegro                       | 24.3 (20.8-27.7) | 25.1 (22.2-28.0) | 25.4 (22.6-28.1) | 25.6 (22.7-28.4) | 25.6 (22.5-28.7) |
| Morocco                          | 23.0 (20.9-25.0) | 24.0 (22.9-25.1) | 24.8 (24.2-25.5) | 25.6 (24.9-26.3) | 26.2 (25.0-27.5) |
| Mozambique                       | 19.3 (17.0-21.7) | 20.4 (18.9-21.8) | 21.4 (20.5-22.3) | 22.3 (21.7-22.9) | 22.9 (22.0-23.9) |
| Myanmar                          | 18.7 (15.9-21.5) | 19.8 (17.9-21.8) | 21.0 (19.7-22.3) | 22.2 (21.4-23.0) | 23.3 (22.4-24.2) |
| Namibia                          | 22.4 (20.3-24.5) | 23.0 (21.8-24.2) | 23.7 (22.9-24.4) | 24.5 (24.0-25.1) | 25.1 (24.4-25.9) |
| Nauru                            | 33.6 (32.5-34.7) | 34.1 (33.5-34.7) | 34.0 (33.4-34.6) | 33.3 (32.6-34.1) | 32.9 (31.4-34.2) |
| Nepal                            | 17.2 (15.2-19.3) | 18.4 (17.1-19.6) | 19.7 (19.0-20.4) | 21.0 (20.6-21.5) | 22.2 (21.5-22.9) |
| Netherlands                      | 23.4 (21.7-25.1) | 23.9 (22.9-24.8) | 24.4 (23.8-25.0) | 24.9 (24.5-25.4) | 25.0 (24.2-25.8) |
| New Zealand                      | 23.5 (22.1-24.9) | 24.7 (23.9-25.4) | 25.8 (25.4-26.4) | 27.0 (26.6-27.4) | 27.7 (27.2-28.2) |
| Nicaragua                        | 23.2 (20.8-25.5) | 24.4 (22.9-25.8) | 25.5 (24.7-26.3) | 26.8 (26.2-27.4) | 27.8 (26.7-28.9) |
| Niger                            | 18.7 (16.7-20.7) | 19.5 (18.3-20.7) | 20.4 (19.6-21.2) | 21.4 (20.7-22.0) | 22.1 (21.1-23.0) |
| Nigeria                          | 20.8 (19.1-22.6) | 21.7 (20.8-22.6) | 22.4 (21.9-22.9) | 23.2 (22.8-23.6) | 23.9 (23.3-24.6) |
| Niue                             | 28.4 (25.6-31.2) | 30.2 (28.0-32.3) | 31.5 (29.9-33.2) | 32.5 (31.3-33.7) | 33.2 (32.0-34.4) |
| North Korea                      | 22.0 (18.4-25.5) | 22.3 (19.3-25.3) | 22.3 (19.4-25.1) | 22.1 (19.0-25.0) | 22.2 (18.8-25.6) |
| Norway                           | 22.7 (21.2-24.1) | 23.7 (22.9-24.5) | 24.5 (23.9-25.1) | 25.1 (24.4-25.9) | 25.4 (24.1-26.6) |
| Occupied Palestinian Territory   | 25.8 (23.6-28.0) | 26.8 (25.4-28.1) | 27.7 (26.8-28.5) | 28.7 (28.1-29.4) | 29.5 (28.5-30.5) |
| Oman                             | 23.9 (21.9-26.0) | 25.1 (24.0-26.2) | 25.7 (25.1-26.4) | 26.0 (25.4-26.6) | 26.1 (25.0-27.2) |
| Pakistan                         | 20.0 (18.3-21.8) | 21.2 (20.2-22.2) | 22.3 (21.7-23.0) | 23.4 (23.0-23.9) | 24.4 (23.7-25.1) |
| Palau                            | 28.8 (25.8-31.9) | 29.3 (27.0-31.6) | 29.8 (28.0-31.6) | 29.9 (28.6-31.2) | 29.6 (28.5-30.8) |
| Panama                           | 22.9 (20.2-25.5) | 24.3 (22.5-26.0) | 25.5 (24.4-26.7) | 26.7 (25.8-27.6) | 27.8 (26.5-29.0) |
| Papua New Guinea                 | 20.8 (18.3-23.2) | 22.1 (20.4-23.7) | 23.5 (22.2-24.7) | 24.7 (23.5-25.6) | 25.7 (24.3-27.1) |
| Paraguay                         | 21.4 (17.9-25.1) | 22.8 (19.8-26.0) | 24.1 (21.3-27.1) | 25.2 (22.3-28.1) | 26.1 (22.9-29.2) |
| Peru                             | 23.4 (21.4-25.5) | 24.5 (23.5-25.6) | 25.3 (24.8-25.8) | 26.1 (25.8-26.4) | 27.0 (26.5-27.4) |
| Philippines                      | 19.3 (18.0-20.5) | 20.7 (20.2-21.3) | 21.9 (21.5-22.3) | 22.7 (22.2-23.2) | 23.4 (22.3-24.4) |
| Poland                           | 25.2 (23.7-26.7) | 25.4 (24.6-26.2) | 25.4 (24.9-26.0) | 25.6 (25.2-26.0) | 25.8 (25.1-26.5) |
| Portugal                         | 24.2 (22.1-26.3) | 24.6 (23.2-25.9) | 25.0 (24.2-25.9) | 25.4 (24.8-25.9) | 25.4 (24.4-26.4) |
| Puerto Rico                      | 24.4 (21.8-27.0) | 25.8 (24.0-27.6) | 27.0 (25.8-28.2) | 27.8 (26.9-28.6) | 28.3 (27.2-29.5) |
| Qatar                            | 26.6 (23.9-29.3) | 28.1 (26.3-30.0) | 28.4 (27.2-29.7) | 29.2 (28.4-30.0) | 29.8 (28.9-30.7) |
| Romania                          | 23.8 (21.7-25.9) | 24.5 (23.2-25.7) | 24.7 (23.9-25.4) | 24.9 (23.8-25.9) | 25.1 (23.4-26.8) |
| Russian Federation               | 25.6 (24.2-27.0) | 26.1 (25.5-26.7) | 26.2 (26.0-26.5) | 26.6 (26.2-27.0) | 27.0 (26.1-27.9) |
| Rwanda                           | 18.5 (16.0-20.9) | 19.6 (17.9-21.1) | 20.7 (19.7-21.6) | 21.8 (21.1-22.4) | 22.6 (21.8-23.4) |
| Saint Kitts and Nevis            | 24.9 (22.1-27.8) | 26.5 (24.4-28.7) | 27.9 (26.2-29.7) | 29.3 (27.7-30.9) | 30.5 (28.7-32.4) |
| Saint Lucia                      | 23.3 (21.9-24.7) | 24.9 (24.0-25.8) | 26.6 (25.7-27.5) | 28.3 (27.4-29.2) | 30.0 (29.0-31.1) |
| Saint Vincent and the Grenadines | 22.8 (19.4-26.0) | 24.1 (21.3-27.0) | 25.6 (22.9-28.3) | 26.9 (24.2-29.6) | 27.9 (24.9-30.8) |
| Samoa                            | 27.8 (26.5-29.1) | 29.4 (28.7-30.1) | 31.1 (30.6-31.7) | 32.7 (32.1-33.2) | 33.8 (33.0-34.6) |
| Sao Tome and Principe            | 21.4 (18.5-24.0) | 22.4 (20.4-24.3) | 23.6 (22.2-24.9) | 24.6 (23.8-25.5) | 25.5 (24.5-26.5) |
| Saudi Arabia                     | 26.1 (24.5-27.8) | 27.2 (26.5-27.9) | 27.9 (27.5-28.2) | 28.3 (27.9-28.8) | 28.9 (28.2-29.7) |
| Senegal                          | 20.8 (19.4-22.2) | 21.7 (21.0-22.5) | 22.5 (21.9-23.1) | 23.4 (22.8-24.0) | 24.0 (23.0-24.8) |
| Serbia                           | 24.1 (22.3-26.0) | 24.7 (23.7-25.7) | 24.9 (24.3-25.6) | 25.1 (24.6-25.6) | 25.3 (24.5-26.0) |
| Seychelles                       | 23.8 (22.0-25.6) | 25.1 (24.2-26.1) | 26.2 (25.6-26.8) | 27.2 (26.5-27.8) | 27.8 (27.0-28.7) |
| Sierra Leone                     | 20.6 (18.0-23.3) | 21.5 (19.7-23.4) | 22.2 (20.9-23.4) | 22.9 (22.1-23.7) | 23.6 (22.8-24.4) |
| Singapore                        | 23.1 (21.6-24.4) | 23.4 (22.7-24.1) | 23.5 (23.0-23.9) | 23.2 (22.8-23.6) | 23.1 (22.4-23.7) |
| Slovakia                         | 23.9 (21.9-25.9) | 24.6 (23.5-25.8) | 24.9 (24.2-25.6) | 25.1 (24.5-25.7) | 25.4 (24.5-26.3) |
| Slovenia                         | 24.3 (21.3-27.2) | 25.1 (22.6-27.4) | 25.5 (23.4-27.6) | 26.0 (24.0-27.9) | 26.3 (24.0-28.5) |
| Solomon Islands                  | 22.3 (19.2-25.4) | 23.7 (21.5-25.9) | 24.9 (23.4-26.5) | 25.8 (24.6-26.9) | 26.4 (25.1-27.7) |
| Somalia                          | 20.2 (16.9-23.6) | 20.9 (18.1-23.8) | 21.5 (18.8-24.3) | 22.0 (19.3-24.9) | 22.5 (19.5-25.6) |
| South Africa                     | 26.4 (24.3-28.6) | 27.0 (25.8-28.2) | 27.6 (26.9-28.2) | 28.4 (28.0-28.8) | 29.2 (28.7-29.8) |
| South Korea                      | 19.7 (18.0-21.4) | 21.6 (20.8-22.5) | 22.8 (22.3-23.2) | 22.9 (22.6-23.3) | 23.2 (22.7-23.7) |
| Spain                            | 25.1 (23.6-26.6) | 25.4 (24.7-26.1) | 25.6 (25.2-26.0) | 25.8 (25.4-26.2) | 25.8 (24.9-26.7) |
| Sri Lanka                        | 19.2 (16.7-21.7) | 20.2 (18.5-21.9) | 21.4 (20.4-22.4) | 22.5 (21.9-23.1) | 23.6 (22.5-24.6) |
| Sudan                            | 22.4 (19.6-25.0) | 23.5 (21.6-25.4) | 24.7 (23.4-26.0) | 25.8 (24.7-26.9) | 26.6 (25.1-28.0) |
| Suriname                         | 24.3 (20.9-27.6) | 25.6 (22.7-28.5) | 26.3 (23.5-29.0) | 27.1 (24.4-29.9) | 28.0 (25.1-31.1) |
| Swaziland                        | 24.3 (21.3-27.2) | 25.6 (23.5-27.6) | 26.7 (25.3-28.2) | 27.8 (26.7-29.0) | 28.8 (27.4-30.2) |
| Sweden                           | 23.5 (22.0-25.0) | 23.9 (23.2-24.7) | 24.4 (24.0-24.9) | 25.0 (24.5-25.5) | 25.3 (24.4-26.3) |
| Switzerland                      | 23.2 (21.5-25.0) | 23.5 (22.5-24.6) | 23.9 (23.1-24.7) | 23.9 (23.0-24.7) | 23.7 (22.4-24.9) |
| Syrian Arab Republic             | 25.2 (22.6-27.7) | 26.4 (24.7-28.0) | 27.2 (26.1-28.3) | 28.1 (27.1-29.1) | 28.8 (27.3-30.3) |

|                          |                  |                  |                  |                  |                  |
|--------------------------|------------------|------------------|------------------|------------------|------------------|
| Taiwan                   | 21.3 (19.4-23.1) | 22.2 (21.2-23.2) | 22.7 (22.2-23.2) | 22.9 (22.4-23.4) | 23.0 (21.9-24.1) |
| Tajikistan               | 22.3 (19.4-25.2) | 23.1 (21.0-25.1) | 23.6 (22.3-24.9) | 24.3 (23.3-25.3) | 25.4 (24.3-26.5) |
| Tanzania                 | 19.9 (17.9-21.8) | 21.0 (20.0-22.0) | 22.0 (21.4-22.5) | 22.9 (22.5-23.4) | 23.8 (23.2-24.5) |
| Thailand                 | 20.9 (19.1-22.6) | 22.0 (21.1-23.0) | 23.1 (22.6-23.5) | 23.9 (23.4-24.3) | 24.5 (23.5-25.4) |
| Timor-Leste              | 17.5 (14.9-20.3) | 18.4 (16.5-20.4) | 19.4 (18.1-20.8) | 20.1 (19.2-21.0) | 20.8 (19.8-21.7) |
| Togo                     | 19.1 (16.6-21.5) | 20.4 (18.8-21.9) | 21.6 (20.6-22.6) | 23.1 (22.3-23.8) | 24.3 (23.4-25.1) |
| Tokelau                  | 28.4 (25.5-31.2) | 30.0 (27.9-32.0) | 31.5 (30.0-32.9) | 32.7 (31.5-33.8) | 33.7 (32.0-35.2) |
| Tonga                    | 29.0 (26.3-31.6) | 30.5 (28.6-32.3) | 31.9 (30.5-33.1) | 32.9 (31.9-33.7) | 33.5 (32.3-34.5) |
| Trinidad and Tobago      | 24.0 (21.8-26.2) | 25.2 (23.7-26.7) | 26.2 (25.1-27.2) | 27.6 (26.4-28.8) | 28.8 (26.9-30.7) |
| Tunisia                  | 24.1 (21.8-26.4) | 25.1 (23.8-26.4) | 25.8 (25.1-26.6) | 26.4 (25.8-27.1) | 26.9 (25.8-28.0) |
| Turkey                   | 25.0 (23.2-26.7) | 26.1 (25.3-27.0) | 27.2 (26.8-27.6) | 28.0 (27.7-28.2) | 28.6 (28.0-29.1) |
| Turkmenistan             | 22.3 (19.7-24.8) | 23.2 (21.5-24.8) | 24.2 (23.1-25.3) | 25.2 (24.4-26.0) | 26.4 (25.5-27.4) |
| Tuvalu                   | 27.8 (26.1-29.5) | 29.2 (27.6-30.7) | 30.5 (28.8-32.3) | 31.2 (29.2-33.2) | 31.5 (28.9-34.0) |
| Uganda                   | 19.6 (17.5-21.8) | 20.4 (19.1-21.6) | 21.2 (20.4-21.9) | 22.1 (21.5-22.7) | 23.0 (22.1-23.9) |
| Ukraine                  | 25.0 (22.3-27.7) | 25.5 (23.6-27.5) | 25.7 (24.3-27.1) | 25.8 (24.5-27.1) | 26.1 (24.3-28.0) |
| United Arab Emirates     | 27.8 (25.3-30.3) | 27.9 (26.5-29.3) | 28.2 (27.3-29.0) | 28.8 (27.9-29.7) | 28.9 (27.3-30.5) |
| United Kingdom           | 23.4 (22.3-24.4) | 24.4 (24.0-24.8) | 25.5 (25.3-25.8) | 26.5 (26.3-26.7) | 27.0 (26.6-27.4) |
| United States of America | 24.6 (23.9-25.2) | 25.5 (25.1-26.0) | 26.8 (26.4-27.1) | 27.9 (27.7-28.2) | 28.7 (28.1-29.3) |
| Uruguay                  | 24.2 (21.6-26.9) | 25.0 (23.2-26.8) | 25.7 (24.4-26.9) | 26.3 (25.4-27.2) | 27.0 (25.8-28.2) |
| Uzbekistan               | 22.1 (19.6-24.6) | 23.2 (21.6-24.7) | 24.2 (23.2-25.2) | 25.2 (24.1-26.2) | 26.4 (24.7-28.0) |
| Vanuatu                  | 23.0 (20.5-25.3) | 24.2 (22.6-25.6) | 25.2 (24.3-26.1) | 26.1 (25.3-26.8) | 26.7 (25.5-27.8) |
| Venezuela                | 23.9 (21.4-26.7) | 24.9 (23.3-26.7) | 25.9 (24.8-27.0) | 26.5 (25.8-27.3) | 27.1 (25.9-28.2) |
| Viet Nam                 | 18.0 (16.5-19.4) | 18.7 (18.1-19.4) | 19.6 (19.2-20.0) | 20.5 (20.2-20.8) | 21.1 (20.4-21.8) |
| Yemen                    | 20.1 (17.8-22.3) | 20.9 (19.5-22.3) | 21.9 (21.1-22.7) | 22.8 (22.3-23.4) | 23.5 (22.7-24.4) |
| Zambia                   | 21.0 (19.1-22.9) | 21.8 (20.7-22.8) | 22.2 (21.7-22.8) | 22.8 (22.4-23.3) | 23.6 (22.8-24.3) |
| Zimbabwe                 | 24.1 (22.2-26.1) | 24.4 (23.4-25.5) | 24.7 (24.1-25.2) | 24.9 (24.4-25.4) | 25.0 (24.1-25.9) |

**Appendix Table 5:** Age-standardised prevalences of BMI <18.5 kg/m<sup>2</sup>, 18.5 to <20 kg/m<sup>2</sup>, 20 to <25 kg/m<sup>2</sup>, 25 to <30 kg/m<sup>2</sup>, 30 to <35 kg/m<sup>2</sup>, 35 to <40 kg/m<sup>2</sup>, ≥40 kg/m<sup>2</sup> by sex and country in 1975, 1985, 1995, 2005, and 2014. Numbers in brackets show 95% credible intervals. Estimates for all countries and years can be downloaded from [www.ncdrisc.org](http://www.ncdrisc.org).

Men, BMI <18.5 kg/m<sup>2</sup>

| Country                  | Year                |                     |                     |                     |                     |
|--------------------------|---------------------|---------------------|---------------------|---------------------|---------------------|
|                          | 1975                | 1985                | 1995                | 2005                | 2014                |
| Afghanistan              | 0.295 (0.153-0.446) | 0.277 (0.154-0.402) | 0.255 (0.142-0.375) | 0.232 (0.126-0.350) | 0.210 (0.102-0.335) |
| Albania                  | 0.026 (0.005-0.073) | 0.021 (0.006-0.049) | 0.016 (0.005-0.036) | 0.010 (0.004-0.022) | 0.006 (0.002-0.015) |
| Algeria                  | 0.124 (0.045-0.234) | 0.102 (0.048-0.180) | 0.083 (0.042-0.142) | 0.064 (0.032-0.109) | 0.044 (0.017-0.086) |
| American Samoa           | 0.005 (0.001-0.014) | 0.004 (0.001-0.008) | 0.003 (0.001-0.006) | 0.002 (0.000-0.004) | 0.001 (0.000-0.004) |
| Andorra                  | 0.021 (0.005-0.059) | 0.013 (0.004-0.033) | 0.009 (0.002-0.021) | 0.005 (0.001-0.013) | 0.004 (0.001-0.011) |
| Angola                   | 0.226 (0.091-0.379) | 0.225 (0.107-0.355) | 0.216 (0.106-0.337) | 0.206 (0.099-0.325) | 0.177 (0.068-0.311) |
| Antigua and Barbuda      | 0.093 (0.025-0.201) | 0.074 (0.024-0.153) | 0.051 (0.017-0.108) | 0.039 (0.012-0.084) | 0.026 (0.006-0.068) |
| Argentina                | 0.022 (0.005-0.057) | 0.015 (0.005-0.031) | 0.010 (0.004-0.021) | 0.006 (0.003-0.013) | 0.004 (0.001-0.010) |
| Armenia                  | 0.064 (0.013-0.169) | 0.045 (0.012-0.108) | 0.034 (0.011-0.078) | 0.024 (0.008-0.053) | 0.013 (0.003-0.034) |
| Australia                | 0.018 (0.008-0.034) | 0.010 (0.006-0.016) | 0.008 (0.004-0.012) | 0.006 (0.003-0.009) | 0.004 (0.002-0.008) |
| Austria                  | 0.027 (0.010-0.058) | 0.017 (0.008-0.032) | 0.012 (0.006-0.022) | 0.009 (0.004-0.016) | 0.006 (0.002-0.014) |
| Azerbaijan               | 0.056 (0.014-0.139) | 0.038 (0.012-0.087) | 0.029 (0.010-0.062) | 0.021 (0.007-0.046) | 0.013 (0.003-0.032) |
| Bahamas                  | 0.091 (0.025-0.200) | 0.068 (0.022-0.142) | 0.047 (0.015-0.100) | 0.029 (0.009-0.064) | 0.019 (0.005-0.048) |
| Bahrain                  | 0.105 (0.038-0.206) | 0.077 (0.037-0.137) | 0.055 (0.028-0.093) | 0.035 (0.017-0.063) | 0.023 (0.008-0.050) |
| Bangladesh               | 0.316 (0.189-0.439) | 0.308 (0.218-0.400) | 0.292 (0.217-0.367) | 0.264 (0.194-0.335) | 0.231 (0.147-0.321) |
| Barbados                 | 0.108 (0.040-0.203) | 0.080 (0.037-0.136) | 0.063 (0.033-0.103) | 0.045 (0.021-0.080) | 0.031 (0.010-0.069) |
| Belarus                  | 0.030 (0.006-0.080) | 0.021 (0.005-0.052) | 0.017 (0.004-0.040) | 0.012 (0.003-0.029) | 0.007 (0.002-0.020) |
| Belgium                  | 0.018 (0.006-0.037) | 0.011 (0.006-0.018) | 0.007 (0.004-0.011) | 0.004 (0.002-0.007) | 0.003 (0.001-0.006) |
| Belize                   | 0.125 (0.039-0.252) | 0.096 (0.038-0.179) | 0.074 (0.032-0.134) | 0.051 (0.022-0.093) | 0.038 (0.013-0.081) |
| Benin                    | 0.164 (0.061-0.295) | 0.157 (0.076-0.256) | 0.151 (0.080-0.234) | 0.135 (0.075-0.208) | 0.119 (0.057-0.197) |
| Bermuda                  | 0.074 (0.017-0.178) | 0.049 (0.014-0.114) | 0.033 (0.009-0.077) | 0.024 (0.007-0.055) | 0.015 (0.003-0.039) |
| Bhutan                   | 0.237 (0.108-0.389) | 0.219 (0.113-0.336) | 0.196 (0.104-0.299) | 0.163 (0.085-0.251) | 0.127 (0.058-0.218) |
| Bolivia                  | 0.050 (0.010-0.132) | 0.037 (0.009-0.090) | 0.027 (0.008-0.065) | 0.019 (0.006-0.043) | 0.013 (0.003-0.035) |
| Bosnia and Herzegovina   | 0.033 (0.005-0.099) | 0.025 (0.006-0.062) | 0.019 (0.006-0.043) | 0.011 (0.004-0.023) | 0.007 (0.002-0.015) |
| Botswana                 | 0.200 (0.084-0.337) | 0.191 (0.097-0.298) | 0.170 (0.088-0.266) | 0.145 (0.075-0.237) | 0.114 (0.048-0.210) |
| Brazil                   | 0.093 (0.036-0.181) | 0.067 (0.037-0.108) | 0.046 (0.031-0.067) | 0.031 (0.021-0.043) | 0.021 (0.011-0.037) |
| Brunei Darussalam        | 0.170 (0.045-0.339) | 0.141 (0.045-0.274) | 0.118 (0.044-0.224) | 0.089 (0.033-0.174) | 0.069 (0.020-0.152) |
| Bulgaria                 | 0.020 (0.004-0.055) | 0.012 (0.004-0.029) | 0.008 (0.003-0.020) | 0.007 (0.002-0.016) | 0.005 (0.001-0.014) |
| Burkina Faso             | 0.176 (0.067-0.315) | 0.169 (0.083-0.270) | 0.163 (0.090-0.247) | 0.149 (0.086-0.224) | 0.137 (0.070-0.223) |
| Burundi                  | 0.208 (0.071-0.371) | 0.199 (0.084-0.336) | 0.187 (0.085-0.310) | 0.174 (0.082-0.286) | 0.159 (0.066-0.275) |
| Cabo Verde               | 0.183 (0.068-0.326) | 0.166 (0.079-0.269) | 0.150 (0.076-0.239) | 0.116 (0.057-0.191) | 0.092 (0.037-0.171) |
| Cambodia                 | 0.236 (0.104-0.382) | 0.229 (0.130-0.336) | 0.220 (0.132-0.316) | 0.196 (0.119-0.284) | 0.163 (0.084-0.259) |
| Cameroon                 | 0.132 (0.051-0.244) | 0.118 (0.061-0.191) | 0.108 (0.062-0.166) | 0.096 (0.057-0.144) | 0.079 (0.036-0.139) |
| Canada                   | 0.015 (0.005-0.032) | 0.009 (0.005-0.016) | 0.007 (0.003-0.011) | 0.005 (0.002-0.008) | 0.004 (0.001-0.008) |
| Central African Republic | 0.233 (0.097-0.392) | 0.225 (0.105-0.359) | 0.223 (0.116-0.342) | 0.209 (0.113-0.318) | 0.191 (0.092-0.307) |
| Chad                     | 0.192 (0.079-0.328) | 0.183 (0.093-0.292) | 0.170 (0.091-0.267) | 0.154 (0.084-0.240) | 0.148 (0.070-0.248) |
| Chile                    | 0.028 (0.007-0.076) | 0.018 (0.007-0.041) | 0.011 (0.005-0.022) | 0.006 (0.003-0.011) | 0.003 (0.001-0.007) |
| China                    | 0.114 (0.055-0.193) | 0.108 (0.079-0.140) | 0.093 (0.074-0.112) | 0.060 (0.047-0.077) | 0.034 (0.019-0.054) |
| China (Hong Kong SAR)    | 0.111 (0.035-0.232) | 0.082 (0.035-0.151) | 0.059 (0.026-0.109) | 0.039 (0.015-0.078) | 0.023 (0.006-0.059) |
| Colombia                 | 0.080 (0.026-0.173) | 0.059 (0.026-0.111) | 0.043 (0.022-0.074) | 0.028 (0.016-0.046) | 0.019 (0.008-0.036) |
| Comoros                  | 0.158 (0.057-0.288) | 0.157 (0.074-0.261) | 0.149 (0.074-0.244) | 0.137 (0.069-0.222) | 0.123 (0.056-0.211) |
| Congo                    | 0.226 (0.114-0.354) | 0.211 (0.124-0.308) | 0.194 (0.120-0.281) | 0.181 (0.109-0.264) | 0.157 (0.074-0.260) |
| Cook Islands             | 0.008 (0.001-0.025) | 0.005 (0.001-0.014) | 0.004 (0.001-0.009) | 0.002 (0.001-0.006) | 0.002 (0.000-0.005) |
| Costa Rica               | 0.073 (0.021-0.168) | 0.052 (0.020-0.106) | 0.036 (0.015-0.071) | 0.023 (0.010-0.043) | 0.015 (0.006-0.031) |
| Cote d'Ivoire            | 0.131 (0.047-0.246) | 0.124 (0.058-0.207) | 0.116 (0.058-0.188) | 0.099 (0.051-0.162) | 0.083 (0.036-0.152) |
| Croatia                  | 0.030 (0.007-0.079) | 0.020 (0.006-0.047) | 0.015 (0.005-0.033) | 0.009 (0.003-0.021) | 0.006 (0.001-0.015) |
| Cuba                     | 0.146 (0.063-0.260) | 0.112 (0.058-0.184) | 0.089 (0.048-0.146) | 0.071 (0.040-0.115) | 0.048 (0.022-0.088) |
| Cyprus                   | 0.021 (0.005-0.058) | 0.015 (0.004-0.035) | 0.009 (0.003-0.021) | 0.006 (0.002-0.014) | 0.004 (0.001-0.012) |
| Czech Republic           | 0.009 (0.002-0.022) | 0.006 (0.002-0.012) | 0.004 (0.002-0.008) | 0.003 (0.001-0.006) | 0.002 (0.001-0.006) |
| Denmark                  | 0.025 (0.012-0.045) | 0.015 (0.008-0.025) | 0.010 (0.005-0.016) | 0.006 (0.003-0.011) | 0.005 (0.002-0.009) |
| Djibouti                 | 0.198 (0.072-0.356) | 0.186 (0.074-0.332) | 0.169 (0.076-0.289) | 0.153 (0.066-0.261) | 0.129 (0.044-0.246) |
| Dominica                 | 0.120 (0.042-0.241) | 0.094 (0.037-0.179) | 0.069 (0.028-0.132) | 0.043 (0.017-0.084) | 0.029 (0.009-0.066) |
| Dominican Republic       | 0.131 (0.052-0.244) | 0.109 (0.055-0.181) | 0.087 (0.047-0.140) | 0.057 (0.029-0.094) | 0.037 (0.014-0.074) |
| DR Congo                 | 0.237 (0.109-0.376) | 0.228 (0.124-0.348) | 0.221 (0.124-0.331) | 0.212 (0.120-0.318) | 0.191 (0.089-0.309) |
| Ecuador                  | 0.039 (0.007-0.108) | 0.025 (0.006-0.063) | 0.018 (0.005-0.043) | 0.012 (0.004-0.028) | 0.008 (0.002-0.021) |
| Egypt                    | 0.067 (0.022-0.146) | 0.048 (0.023-0.086) | 0.036 (0.019-0.060) | 0.025 (0.014-0.041) | 0.017 (0.007-0.033) |
| El Salvador              | 0.078 (0.019-0.186) | 0.060 (0.020-0.129) | 0.045 (0.016-0.092) | 0.029 (0.011-0.058) | 0.019 (0.006-0.044) |
| Equatorial Guinea        | 0.223 (0.085-0.386) | 0.208 (0.092-0.339) | 0.197 (0.089-0.320) | 0.169 (0.069-0.295) | 0.145 (0.044-0.294) |
| Eritrea                  | 0.240 (0.117-0.374) | 0.234 (0.136-0.336) | 0.225 (0.141-0.314) | 0.215 (0.140-0.297) | 0.204 (0.118-0.301) |
| Estonia                  | 0.026 (0.008-0.060) | 0.018 (0.008-0.034) | 0.015 (0.008-0.025) | 0.009 (0.005-0.014) | 0.006 (0.003-0.011) |
| Ethiopia                 | 0.226 (0.101-0.369) | 0.218 (0.119-0.329) | 0.212 (0.126-0.307) | 0.209 (0.130-0.295) | 0.202 (0.116-0.301) |
| Fiji                     | 0.058 (0.012-0.139) | 0.044 (0.014-0.096) | 0.036 (0.013-0.075) | 0.028 (0.012-0.055) | 0.022 (0.008-0.048) |
| Finland                  | 0.015 (0.006-0.030) | 0.009 (0.005-0.015) | 0.006 (0.003-0.010) | 0.004 (0.002-0.007) | 0.003 (0.001-0.006) |
| France                   | 0.020 (0.007-0.042) | 0.013 (0.006-0.024) | 0.009 (0.005-0.017) | 0.007 (0.003-0.012) | 0.005 (0.002-0.012) |
| French Polynesia         | 0.008 (0.001-0.025) | 0.006 (0.001-0.016) | 0.004 (0.001-0.010) | 0.002 (0.001-0.006) | 0.002 (0.000-0.005) |

|                                  |                     |                     |                     |                     |                     |
|----------------------------------|---------------------|---------------------|---------------------|---------------------|---------------------|
| Gabon                            | 0.187 (0.068-0.339) | 0.168 (0.071-0.286) | 0.149 (0.064-0.257) | 0.128 (0.053-0.223) | 0.107 (0.039-0.207) |
| Gambia                           | 0.186 (0.080-0.318) | 0.180 (0.099-0.274) | 0.164 (0.094-0.248) | 0.139 (0.080-0.213) | 0.121 (0.056-0.204) |
| Georgia                          | 0.058 (0.014-0.144) | 0.040 (0.012-0.091) | 0.032 (0.010-0.072) | 0.023 (0.008-0.050) | 0.016 (0.005-0.036) |
| Germany                          | 0.015 (0.007-0.029) | 0.009 (0.006-0.014) | 0.007 (0.004-0.010) | 0.005 (0.003-0.007) | 0.003 (0.001-0.006) |
| Ghana                            | 0.165 (0.073-0.279) | 0.158 (0.090-0.240) | 0.146 (0.091-0.211) | 0.120 (0.074-0.173) | 0.095 (0.046-0.161) |
| Greece                           | 0.021 (0.006-0.053) | 0.013 (0.005-0.027) | 0.008 (0.003-0.018) | 0.006 (0.002-0.012) | 0.004 (0.001-0.011) |
| Greenland                        | 0.027 (0.008-0.063) | 0.017 (0.006-0.035) | 0.011 (0.004-0.024) | 0.008 (0.003-0.017) | 0.006 (0.002-0.013) |
| Grenada                          | 0.117 (0.040-0.235) | 0.094 (0.039-0.177) | 0.070 (0.029-0.134) | 0.050 (0.020-0.096) | 0.034 (0.011-0.074) |
| Guatemala                        | 0.089 (0.028-0.195) | 0.071 (0.029-0.137) | 0.056 (0.025-0.102) | 0.037 (0.017-0.069) | 0.026 (0.008-0.055) |
| Guinea                           | 0.176 (0.062-0.318) | 0.166 (0.076-0.272) | 0.160 (0.080-0.253) | 0.144 (0.077-0.224) | 0.129 (0.061-0.214) |
| Guinea Bissau                    | 0.172 (0.063-0.311) | 0.168 (0.077-0.277) | 0.157 (0.077-0.259) | 0.147 (0.072-0.239) | 0.131 (0.054-0.232) |
| Guyana                           | 0.126 (0.043-0.249) | 0.105 (0.043-0.194) | 0.087 (0.037-0.160) | 0.062 (0.025-0.119) | 0.051 (0.017-0.108) |
| Haiti                            | 0.154 (0.050-0.296) | 0.135 (0.053-0.244) | 0.122 (0.049-0.222) | 0.098 (0.036-0.184) | 0.076 (0.021-0.163) |
| Honduras                         | 0.091 (0.025-0.201) | 0.073 (0.026-0.147) | 0.057 (0.022-0.113) | 0.039 (0.015-0.077) | 0.028 (0.008-0.063) |
| Hungary                          | 0.019 (0.006-0.045) | 0.012 (0.005-0.023) | 0.008 (0.004-0.016) | 0.007 (0.003-0.013) | 0.005 (0.001-0.012) |
| Iceland                          | 0.013 (0.004-0.031) | 0.006 (0.002-0.013) | 0.005 (0.002-0.010) | 0.003 (0.001-0.007) | 0.002 (0.001-0.005) |
| India                            | 0.364 (0.265-0.465) | 0.340 (0.277-0.404) | 0.316 (0.275-0.358) | 0.282 (0.244-0.319) | 0.245 (0.181-0.310) |
| Indonesia                        | 0.233 (0.131-0.345) | 0.227 (0.160-0.298) | 0.213 (0.158-0.271) | 0.185 (0.136-0.237) | 0.149 (0.092-0.215) |
| Iran                             | 0.108 (0.040-0.205) | 0.085 (0.048-0.134) | 0.066 (0.045-0.093) | 0.046 (0.034-0.060) | 0.029 (0.016-0.047) |
| Iraq                             | 0.085 (0.025-0.192) | 0.066 (0.025-0.134) | 0.055 (0.022-0.108) | 0.041 (0.016-0.080) | 0.029 (0.010-0.065) |
| Ireland                          | 0.016 (0.004-0.040) | 0.010 (0.003-0.022) | 0.007 (0.003-0.014) | 0.005 (0.002-0.009) | 0.004 (0.001-0.009) |
| Israel                           | 0.021 (0.006-0.049) | 0.014 (0.006-0.028) | 0.009 (0.004-0.018) | 0.006 (0.003-0.012) | 0.005 (0.001-0.011) |
| Italy                            | 0.019 (0.007-0.039) | 0.012 (0.007-0.019) | 0.008 (0.005-0.013) | 0.006 (0.003-0.009) | 0.004 (0.002-0.009) |
| Jamaica                          | 0.132 (0.054-0.234) | 0.113 (0.064-0.175) | 0.091 (0.057-0.134) | 0.062 (0.036-0.096) | 0.042 (0.017-0.080) |
| Japan                            | 0.092 (0.062-0.128) | 0.073 (0.058-0.090) | 0.059 (0.047-0.072) | 0.050 (0.039-0.064) | 0.045 (0.027-0.069) |
| Jordan                           | 0.061 (0.017-0.145) | 0.040 (0.017-0.077) | 0.026 (0.012-0.047) | 0.016 (0.007-0.028) | 0.010 (0.004-0.021) |
| Kazakhstan                       | 0.067 (0.018-0.157) | 0.046 (0.015-0.100) | 0.033 (0.011-0.074) | 0.022 (0.007-0.052) | 0.012 (0.003-0.033) |
| Kenya                            | 0.195 (0.081-0.325) | 0.179 (0.091-0.283) | 0.163 (0.084-0.258) | 0.151 (0.077-0.243) | 0.133 (0.056-0.237) |
| Kiribati                         | 0.010 (0.002-0.028) | 0.008 (0.002-0.019) | 0.006 (0.002-0.015) | 0.004 (0.001-0.010) | 0.003 (0.001-0.010) |
| Kuwait                           | 0.053 (0.016-0.120) | 0.034 (0.016-0.060) | 0.024 (0.013-0.041) | 0.013 (0.007-0.022) | 0.008 (0.003-0.016) |
| Kyrgyzstan                       | 0.066 (0.017-0.160) | 0.048 (0.016-0.105) | 0.037 (0.013-0.078) | 0.028 (0.011-0.060) | 0.020 (0.006-0.046) |
| Lao PDR                          | 0.224 (0.106-0.353) | 0.219 (0.127-0.320) | 0.209 (0.128-0.297) | 0.186 (0.115-0.268) | 0.153 (0.080-0.240) |
| Latvia                           | 0.031 (0.007-0.080) | 0.021 (0.007-0.048) | 0.017 (0.006-0.038) | 0.012 (0.004-0.027) | 0.007 (0.002-0.017) |
| Lebanon                          | 0.066 (0.021-0.144) | 0.047 (0.019-0.094) | 0.028 (0.012-0.056) | 0.015 (0.006-0.031) | 0.010 (0.003-0.023) |
| Lesotho                          | 0.192 (0.077-0.330) | 0.179 (0.090-0.284) | 0.168 (0.090-0.258) | 0.154 (0.086-0.235) | 0.135 (0.067-0.223) |
| Liberia                          | 0.148 (0.056-0.273) | 0.142 (0.064-0.243) | 0.137 (0.061-0.241) | 0.116 (0.059-0.188) | 0.098 (0.045-0.171) |
| Libya                            | 0.080 (0.020-0.185) | 0.054 (0.022-0.106) | 0.040 (0.018-0.076) | 0.029 (0.013-0.054) | 0.020 (0.007-0.044) |
| Lithuania                        | 0.019 (0.005-0.046) | 0.012 (0.004-0.025) | 0.009 (0.004-0.018) | 0.006 (0.003-0.012) | 0.003 (0.001-0.009) |
| Luxembourg                       | 0.018 (0.005-0.046) | 0.011 (0.003-0.026) | 0.006 (0.002-0.016) | 0.005 (0.002-0.011) | 0.004 (0.001-0.009) |
| Macedonia (TFYR)                 | 0.029 (0.006-0.082) | 0.020 (0.005-0.048) | 0.015 (0.004-0.036) | 0.010 (0.003-0.024) | 0.007 (0.002-0.019) |
| Madagascar                       | 0.198 (0.087-0.327) | 0.191 (0.106-0.289) | 0.182 (0.106-0.270) | 0.173 (0.102-0.256) | 0.161 (0.080-0.263) |
| Malawi                           | 0.188 (0.073-0.330) | 0.178 (0.090-0.283) | 0.173 (0.095-0.264) | 0.158 (0.090-0.237) | 0.140 (0.066-0.229) |
| Malaysia                         | 0.194 (0.096-0.310) | 0.165 (0.098-0.243) | 0.131 (0.083-0.189) | 0.099 (0.066-0.140) | 0.075 (0.039-0.122) |
| Maldives                         | 0.185 (0.081-0.319) | 0.178 (0.095-0.275) | 0.150 (0.079-0.237) | 0.114 (0.055-0.193) | 0.093 (0.040-0.169) |
| Mali                             | 0.178 (0.065-0.316) | 0.170 (0.082-0.276) | 0.168 (0.090-0.263) | 0.155 (0.088-0.237) | 0.138 (0.065-0.228) |
| Malta                            | 0.030 (0.006-0.084) | 0.016 (0.005-0.038) | 0.011 (0.004-0.024) | 0.006 (0.002-0.015) | 0.005 (0.001-0.012) |
| Marshall Islands                 | 0.011 (0.002-0.036) | 0.008 (0.002-0.022) | 0.006 (0.002-0.014) | 0.004 (0.001-0.010) | 0.003 (0.001-0.009) |
| Mauritania                       | 0.177 (0.070-0.313) | 0.174 (0.087-0.280) | 0.165 (0.087-0.261) | 0.147 (0.078-0.232) | 0.124 (0.054-0.218) |
| Mauritius                        | 0.164 (0.073-0.280) | 0.138 (0.078-0.209) | 0.113 (0.065-0.172) | 0.089 (0.048-0.141) | 0.071 (0.028-0.133) |
| Mexico                           | 0.069 (0.024-0.153) | 0.045 (0.022-0.082) | 0.027 (0.016-0.044) | 0.016 (0.010-0.024) | 0.010 (0.005-0.018) |
| Micronesia (Federated States of) | 0.016 (0.003-0.045) | 0.012 (0.004-0.030) | 0.010 (0.003-0.023) | 0.008 (0.003-0.017) | 0.006 (0.002-0.015) |
| Moldova                          | 0.037 (0.008-0.094) | 0.028 (0.008-0.065) | 0.025 (0.008-0.056) | 0.023 (0.008-0.050) | 0.015 (0.004-0.036) |
| Mongolia                         | 0.069 (0.018-0.160) | 0.052 (0.020-0.104) | 0.041 (0.019-0.076) | 0.030 (0.015-0.053) | 0.020 (0.008-0.040) |
| Montenegro                       | 0.031 (0.005-0.092) | 0.021 (0.005-0.054) | 0.015 (0.004-0.037) | 0.009 (0.002-0.021) | 0.005 (0.001-0.015) |
| Morocco                          | 0.106 (0.033-0.219) | 0.087 (0.037-0.164) | 0.070 (0.032-0.128) | 0.051 (0.023-0.096) | 0.036 (0.012-0.077) |
| Mozambique                       | 0.183 (0.068-0.336) | 0.178 (0.084-0.294) | 0.174 (0.092-0.270) | 0.162 (0.090-0.249) | 0.153 (0.076-0.252) |
| Myanmar                          | 0.255 (0.109-0.414) | 0.244 (0.140-0.357) | 0.230 (0.146-0.320) | 0.209 (0.140-0.283) | 0.167 (0.098-0.247) |
| Namibia                          | 0.174 (0.065-0.309) | 0.167 (0.083-0.267) | 0.160 (0.086-0.246) | 0.137 (0.075-0.214) | 0.111 (0.050-0.193) |
| Nauru                            | 0.004 (0.001-0.012) | 0.003 (0.001-0.006) | 0.002 (0.001-0.005) | 0.002 (0.000-0.004) | 0.001 (0.000-0.004) |
| Nepal                            | 0.275 (0.145-0.417) | 0.261 (0.163-0.368) | 0.241 (0.157-0.331) | 0.212 (0.135-0.294) | 0.180 (0.098-0.272) |
| Netherlands                      | 0.029 (0.011-0.061) | 0.021 (0.011-0.035) | 0.014 (0.008-0.022) | 0.008 (0.005-0.013) | 0.005 (0.002-0.011) |
| New Zealand                      | 0.016 (0.005-0.036) | 0.009 (0.004-0.017) | 0.006 (0.003-0.011) | 0.005 (0.003-0.009) | 0.004 (0.002-0.008) |
| Nicaragua                        | 0.088 (0.024-0.201) | 0.068 (0.024-0.139) | 0.057 (0.023-0.111) | 0.042 (0.017-0.082) | 0.031 (0.010-0.070) |
| Niger                            | 0.200 (0.087-0.336) | 0.200 (0.106-0.307) | 0.194 (0.110-0.289) | 0.183 (0.106-0.268) | 0.171 (0.087-0.271) |
| Nigeria                          | 0.176 (0.084-0.285) | 0.162 (0.102-0.230) | 0.156 (0.108-0.212) | 0.135 (0.096-0.181) | 0.110 (0.065-0.165) |
| Niue                             | 0.007 (0.001-0.024) | 0.005 (0.001-0.014) | 0.004 (0.001-0.010) | 0.002 (0.001-0.006) | 0.002 (0.000-0.005) |
| North Korea                      | 0.142 (0.047-0.280) | 0.120 (0.047-0.231) | 0.106 (0.041-0.205) | 0.102 (0.035-0.203) | 0.089 (0.022-0.206) |
| Norway                           | 0.036 (0.015-0.072) | 0.021 (0.011-0.035) | 0.014 (0.008-0.023) | 0.009 (0.005-0.014) | 0.006 (0.002-0.012) |

|                                  |                     |                     |                     |                     |                     |
|----------------------------------|---------------------|---------------------|---------------------|---------------------|---------------------|
| Occupied Palestinian Territory   | 0.050 (0.013-0.120) | 0.038 (0.014-0.077) | 0.028 (0.012-0.053) | 0.019 (0.008-0.036) | 0.015 (0.005-0.034) |
| Oman                             | 0.116 (0.039-0.235) | 0.090 (0.045-0.153) | 0.067 (0.038-0.106) | 0.046 (0.025-0.074) | 0.031 (0.012-0.058) |
| Pakistan                         | 0.290 (0.171-0.416) | 0.264 (0.182-0.355) | 0.234 (0.166-0.310) | 0.202 (0.136-0.276) | 0.170 (0.090-0.263) |
| Palau                            | 0.009 (0.001-0.030) | 0.006 (0.001-0.016) | 0.004 (0.001-0.011) | 0.003 (0.001-0.008) | 0.002 (0.000-0.006) |
| Panama                           | 0.073 (0.021-0.168) | 0.050 (0.018-0.103) | 0.037 (0.015-0.074) | 0.025 (0.011-0.048) | 0.017 (0.006-0.036) |
| Papua New Guinea                 | 0.033 (0.005-0.097) | 0.027 (0.007-0.070) | 0.024 (0.007-0.058) | 0.022 (0.007-0.049) | 0.019 (0.005-0.048) |
| Paraguay                         | 0.051 (0.010-0.133) | 0.039 (0.010-0.093) | 0.027 (0.008-0.065) | 0.018 (0.005-0.043) | 0.013 (0.003-0.034) |
| Peru                             | 0.039 (0.010-0.102) | 0.028 (0.009-0.061) | 0.020 (0.008-0.040) | 0.013 (0.006-0.023) | 0.008 (0.003-0.017) |
| Philippines                      | 0.194 (0.094-0.312) | 0.179 (0.108-0.260) | 0.165 (0.104-0.234) | 0.144 (0.090-0.207) | 0.123 (0.063-0.203) |
| Poland                           | 0.025 (0.008-0.055) | 0.017 (0.009-0.030) | 0.014 (0.007-0.022) | 0.010 (0.006-0.016) | 0.007 (0.003-0.014) |
| Portugal                         | 0.026 (0.008-0.060) | 0.020 (0.009-0.036) | 0.013 (0.007-0.021) | 0.008 (0.004-0.013) | 0.006 (0.002-0.012) |
| Puerto Rico                      | 0.087 (0.028-0.187) | 0.063 (0.025-0.124) | 0.042 (0.017-0.082) | 0.024 (0.010-0.049) | 0.015 (0.005-0.035) |
| Qatar                            | 0.079 (0.024-0.177) | 0.047 (0.016-0.098) | 0.032 (0.013-0.061) | 0.018 (0.008-0.036) | 0.011 (0.004-0.025) |
| Romania                          | 0.030 (0.007-0.078) | 0.018 (0.006-0.039) | 0.014 (0.005-0.029) | 0.011 (0.004-0.023) | 0.007 (0.002-0.018) |
| Russian Federation               | 0.036 (0.013-0.073) | 0.024 (0.014-0.037) | 0.020 (0.014-0.027) | 0.016 (0.010-0.023) | 0.010 (0.004-0.020) |
| Rwanda                           | 0.174 (0.060-0.331) | 0.163 (0.068-0.284) | 0.156 (0.075-0.256) | 0.143 (0.076-0.223) | 0.129 (0.062-0.214) |
| Saint Kitts and Nevis            | 0.097 (0.028-0.204) | 0.069 (0.023-0.139) | 0.055 (0.020-0.109) | 0.036 (0.013-0.075) | 0.026 (0.007-0.062) |
| Saint Lucia                      | 0.115 (0.045-0.214) | 0.097 (0.049-0.160) | 0.076 (0.038-0.125) | 0.049 (0.022-0.089) | 0.036 (0.010-0.079) |
| Saint Vincent and the Grenadines | 0.116 (0.035-0.241) | 0.097 (0.037-0.183) | 0.074 (0.028-0.143) | 0.053 (0.019-0.107) | 0.033 (0.009-0.080) |
| Samoa                            | 0.004 (0.001-0.012) | 0.003 (0.001-0.007) | 0.002 (0.000-0.004) | 0.001 (0.000-0.003) | 0.001 (0.000-0.002) |
| Sao Tome and Principe            | 0.131 (0.047-0.249) | 0.124 (0.055-0.213) | 0.107 (0.048-0.184) | 0.086 (0.041-0.146) | 0.066 (0.026-0.126) |
| Saudi Arabia                     | 0.081 (0.026-0.170) | 0.050 (0.026-0.084) | 0.035 (0.021-0.052) | 0.024 (0.014-0.038) | 0.016 (0.007-0.030) |
| Senegal                          | 0.193 (0.087-0.318) | 0.186 (0.102-0.284) | 0.173 (0.097-0.261) | 0.155 (0.088-0.236) | 0.140 (0.068-0.229) |
| Serbia                           | 0.029 (0.008-0.069) | 0.019 (0.008-0.038) | 0.014 (0.007-0.027) | 0.010 (0.005-0.017) | 0.007 (0.003-0.015) |
| Seychelles                       | 0.140 (0.058-0.242) | 0.114 (0.057-0.187) | 0.091 (0.048-0.149) | 0.067 (0.034-0.114) | 0.052 (0.021-0.102) |
| Sierra Leone                     | 0.169 (0.066-0.301) | 0.163 (0.080-0.266) | 0.156 (0.084-0.246) | 0.143 (0.082-0.217) | 0.119 (0.060-0.195) |
| Singapore                        | 0.136 (0.060-0.237) | 0.092 (0.053-0.139) | 0.064 (0.038-0.095) | 0.050 (0.031-0.075) | 0.038 (0.019-0.066) |
| Slovakia                         | 0.017 (0.004-0.043) | 0.011 (0.004-0.023) | 0.008 (0.003-0.015) | 0.006 (0.002-0.011) | 0.004 (0.001-0.009) |
| Slovenia                         | 0.025 (0.005-0.069) | 0.016 (0.004-0.038) | 0.011 (0.003-0.027) | 0.007 (0.002-0.017) | 0.005 (0.001-0.014) |
| Solomon Islands                  | 0.033 (0.005-0.096) | 0.027 (0.006-0.070) | 0.025 (0.007-0.058) | 0.023 (0.008-0.050) | 0.020 (0.006-0.046) |
| Somalia                          | 0.185 (0.066-0.332) | 0.180 (0.080-0.301) | 0.175 (0.083-0.289) | 0.161 (0.074-0.267) | 0.148 (0.060-0.266) |
| South Africa                     | 0.147 (0.068-0.246) | 0.129 (0.078-0.190) | 0.112 (0.075-0.156) | 0.092 (0.065-0.123) | 0.067 (0.040-0.102) |
| South Korea                      | 0.132 (0.058-0.224) | 0.093 (0.057-0.138) | 0.063 (0.041-0.090) | 0.045 (0.031-0.063) | 0.028 (0.015-0.046) |
| Spain                            | 0.023 (0.008-0.048) | 0.013 (0.007-0.021) | 0.008 (0.005-0.012) | 0.005 (0.003-0.008) | 0.004 (0.002-0.008) |
| Sri Lanka                        | 0.226 (0.111-0.349) | 0.214 (0.127-0.303) | 0.203 (0.130-0.280) | 0.182 (0.118-0.255) | 0.159 (0.081-0.255) |
| Sudan                            | 0.168 (0.064-0.303) | 0.158 (0.073-0.263) | 0.154 (0.077-0.248) | 0.136 (0.067-0.223) | 0.118 (0.047-0.212) |
| Suriname                         | 0.122 (0.040-0.246) | 0.100 (0.038-0.193) | 0.083 (0.032-0.163) | 0.054 (0.019-0.111) | 0.037 (0.010-0.086) |
| Swaziland                        | 0.162 (0.058-0.297) | 0.150 (0.067-0.255) | 0.136 (0.063-0.225) | 0.115 (0.052-0.196) | 0.098 (0.037-0.189) |
| Sweden                           | 0.025 (0.012-0.047) | 0.016 (0.010-0.024) | 0.011 (0.007-0.017) | 0.007 (0.004-0.011) | 0.005 (0.002-0.009) |
| Switzerland                      | 0.026 (0.008-0.059) | 0.016 (0.007-0.031) | 0.011 (0.006-0.020) | 0.009 (0.005-0.015) | 0.007 (0.003-0.013) |
| Syrian Arab Republic             | 0.088 (0.026-0.197) | 0.061 (0.022-0.122) | 0.047 (0.019-0.092) | 0.032 (0.013-0.064) | 0.023 (0.007-0.053) |
| Taiwan                           | 0.117 (0.048-0.207) | 0.090 (0.051-0.142) | 0.061 (0.037-0.092) | 0.041 (0.024-0.063) | 0.032 (0.013-0.062) |
| Tajikistan                       | 0.069 (0.016-0.171) | 0.053 (0.015-0.121) | 0.043 (0.012-0.100) | 0.038 (0.011-0.089) | 0.028 (0.007-0.074) |
| Tanzania                         | 0.169 (0.069-0.300) | 0.165 (0.089-0.257) | 0.160 (0.094-0.237) | 0.152 (0.095-0.217) | 0.133 (0.073-0.206) |
| Thailand                         | 0.199 (0.098-0.310) | 0.182 (0.119-0.251) | 0.159 (0.110-0.212) | 0.130 (0.089-0.176) | 0.105 (0.056-0.169) |
| Timor-Leste                      | 0.249 (0.122-0.385) | 0.252 (0.153-0.358) | 0.245 (0.155-0.341) | 0.230 (0.147-0.322) | 0.215 (0.124-0.319) |
| Togo                             | 0.164 (0.063-0.293) | 0.156 (0.075-0.259) | 0.148 (0.077-0.237) | 0.134 (0.073-0.213) | 0.119 (0.055-0.203) |
| Tokelau                          | 0.008 (0.001-0.034) | 0.006 (0.001-0.019) | 0.005 (0.001-0.013) | 0.003 (0.001-0.009) | 0.003 (0.000-0.008) |
| Tonga                            | 0.006 (0.001-0.021) | 0.004 (0.001-0.012) | 0.003 (0.001-0.008) | 0.002 (0.001-0.006) | 0.002 (0.000-0.005) |
| Trinidad and Tobago              | 0.091 (0.019-0.216) | 0.069 (0.020-0.148) | 0.057 (0.021-0.110) | 0.040 (0.013-0.083) | 0.027 (0.005-0.074) |
| Tunisia                          | 0.107 (0.040-0.213) | 0.083 (0.041-0.143) | 0.063 (0.033-0.105) | 0.043 (0.022-0.072) | 0.030 (0.012-0.059) |
| Turkey                           | 0.057 (0.019-0.125) | 0.042 (0.022-0.073) | 0.030 (0.018-0.045) | 0.018 (0.012-0.026) | 0.010 (0.005-0.018) |
| Turkmenistan                     | 0.067 (0.017-0.164) | 0.048 (0.015-0.107) | 0.035 (0.012-0.079) | 0.027 (0.010-0.058) | 0.017 (0.005-0.039) |
| Tuvalu                           | 0.008 (0.001-0.024) | 0.006 (0.001-0.016) | 0.005 (0.001-0.012) | 0.003 (0.001-0.008) | 0.002 (0.000-0.007) |
| Uganda                           | 0.156 (0.055-0.297) | 0.148 (0.067-0.253) | 0.140 (0.068-0.230) | 0.130 (0.069-0.204) | 0.115 (0.057-0.191) |
| Ukraine                          | 0.032 (0.006-0.087) | 0.022 (0.006-0.055) | 0.018 (0.005-0.044) | 0.015 (0.004-0.036) | 0.009 (0.002-0.026) |
| United Arab Emirates             | 0.064 (0.013-0.165) | 0.037 (0.013-0.077) | 0.024 (0.011-0.046) | 0.017 (0.007-0.033) | 0.015 (0.005-0.033) |
| United Kingdom                   | 0.022 (0.009-0.043) | 0.015 (0.010-0.023) | 0.012 (0.008-0.016) | 0.009 (0.006-0.012) | 0.006 (0.004-0.010) |
| United States of America         | 0.021 (0.010-0.039) | 0.013 (0.007-0.020) | 0.009 (0.006-0.014) | 0.007 (0.005-0.011) | 0.006 (0.003-0.011) |
| Uruguay                          | 0.040 (0.008-0.112) | 0.029 (0.009-0.067) | 0.020 (0.007-0.044) | 0.012 (0.004-0.025) | 0.008 (0.002-0.019) |
| Uzbekistan                       | 0.066 (0.015-0.164) | 0.048 (0.015-0.108) | 0.036 (0.012-0.079) | 0.028 (0.010-0.061) | 0.021 (0.005-0.051) |
| Vanuatu                          | 0.031 (0.005-0.089) | 0.025 (0.006-0.061) | 0.022 (0.007-0.048) | 0.019 (0.007-0.040) | 0.016 (0.005-0.037) |
| Venezuela                        | 0.052 (0.014-0.132) | 0.035 (0.013-0.075) | 0.023 (0.010-0.045) | 0.014 (0.006-0.026) | 0.009 (0.003-0.019) |
| Viet Nam                         | 0.277 (0.166-0.389) | 0.273 (0.205-0.343) | 0.260 (0.211-0.313) | 0.231 (0.186-0.280) | 0.184 (0.119-0.253) |
| Yemen                            | 0.106 (0.029-0.231) | 0.091 (0.035-0.174) | 0.078 (0.034-0.144) | 0.064 (0.028-0.118) | 0.051 (0.018-0.105) |
| Zambia                           | 0.194 (0.087-0.322) | 0.189 (0.101-0.290) | 0.178 (0.102-0.268) | 0.162 (0.095-0.242) | 0.139 (0.067-0.229) |
| Zimbabwe                         | 0.177 (0.077-0.298) | 0.166 (0.092-0.251) | 0.155 (0.091-0.225) | 0.136 (0.080-0.203) | 0.121 (0.058-0.202) |

## Women, BMI <18.5 kg/m<sup>2</sup>

| Country                  | Year                |                     |                     |                     |                     |
|--------------------------|---------------------|---------------------|---------------------|---------------------|---------------------|
|                          | 1975                | 1985                | 1995                | 2005                | 2014                |
| Afghanistan              | 0.302 (0.165-0.441) | 0.279 (0.164-0.394) | 0.254 (0.149-0.358) | 0.228 (0.132-0.330) | 0.197 (0.101-0.306) |
| Albania                  | 0.051 (0.014-0.121) | 0.043 (0.016-0.090) | 0.040 (0.016-0.078) | 0.032 (0.014-0.062) | 0.027 (0.010-0.057) |
| Algeria                  | 0.110 (0.039-0.224) | 0.086 (0.038-0.154) | 0.067 (0.033-0.115) | 0.053 (0.026-0.090) | 0.041 (0.018-0.078) |
| American Samoa           | 0.011 (0.003-0.026) | 0.008 (0.003-0.017) | 0.006 (0.002-0.013) | 0.005 (0.002-0.011) | 0.005 (0.001-0.012) |
| Andorra                  | 0.031 (0.008-0.076) | 0.023 (0.007-0.052) | 0.020 (0.007-0.043) | 0.017 (0.006-0.038) | 0.016 (0.004-0.038) |
| Angola                   | 0.181 (0.064-0.326) | 0.168 (0.072-0.287) | 0.155 (0.070-0.262) | 0.141 (0.062-0.243) | 0.117 (0.044-0.222) |
| Antigua and Barbuda      | 0.084 (0.023-0.184) | 0.064 (0.021-0.135) | 0.045 (0.015-0.094) | 0.034 (0.011-0.073) | 0.024 (0.006-0.058) |
| Argentina                | 0.035 (0.011-0.078) | 0.027 (0.012-0.051) | 0.022 (0.011-0.039) | 0.017 (0.008-0.029) | 0.013 (0.005-0.025) |
| Armenia                  | 0.068 (0.018-0.169) | 0.054 (0.020-0.112) | 0.048 (0.020-0.089) | 0.040 (0.018-0.074) | 0.029 (0.011-0.063) |
| Australia                | 0.046 (0.025-0.076) | 0.034 (0.022-0.049) | 0.026 (0.017-0.038) | 0.022 (0.014-0.031) | 0.018 (0.010-0.030) |
| Austria                  | 0.059 (0.025-0.110) | 0.046 (0.024-0.077) | 0.038 (0.021-0.062) | 0.033 (0.017-0.055) | 0.029 (0.012-0.055) |
| Azerbaijan               | 0.071 (0.019-0.161) | 0.053 (0.020-0.111) | 0.045 (0.018-0.085) | 0.037 (0.016-0.070) | 0.027 (0.009-0.057) |
| Bahamas                  | 0.060 (0.016-0.141) | 0.047 (0.016-0.100) | 0.037 (0.013-0.076) | 0.029 (0.010-0.061) | 0.025 (0.008-0.056) |
| Bahrain                  | 0.075 (0.024-0.160) | 0.062 (0.028-0.112) | 0.050 (0.025-0.087) | 0.040 (0.020-0.071) | 0.034 (0.014-0.066) |
| Bangladesh               | 0.373 (0.261-0.489) | 0.357 (0.276-0.443) | 0.337 (0.270-0.400) | 0.305 (0.243-0.364) | 0.265 (0.186-0.343) |
| Barbados                 | 0.094 (0.035-0.187) | 0.072 (0.034-0.126) | 0.056 (0.029-0.095) | 0.040 (0.019-0.071) | 0.029 (0.010-0.061) |
| Belarus                  | 0.037 (0.008-0.096) | 0.030 (0.009-0.069) | 0.028 (0.010-0.062) | 0.027 (0.009-0.057) | 0.023 (0.007-0.053) |
| Belgium                  | 0.033 (0.014-0.063) | 0.027 (0.016-0.041) | 0.022 (0.014-0.033) | 0.019 (0.011-0.030) | 0.019 (0.009-0.034) |
| Belize                   | 0.086 (0.025-0.189) | 0.068 (0.026-0.135) | 0.054 (0.023-0.100) | 0.039 (0.017-0.073) | 0.030 (0.011-0.063) |
| Benin                    | 0.147 (0.060-0.264) | 0.131 (0.069-0.209) | 0.122 (0.071-0.184) | 0.108 (0.065-0.161) | 0.095 (0.051-0.152) |
| Bermuda                  | 0.042 (0.009-0.111) | 0.035 (0.009-0.082) | 0.029 (0.008-0.067) | 0.026 (0.008-0.057) | 0.023 (0.006-0.054) |
| Bhutan                   | 0.256 (0.129-0.399) | 0.230 (0.127-0.344) | 0.197 (0.109-0.295) | 0.157 (0.085-0.243) | 0.120 (0.056-0.202) |
| Bolivia                  | 0.048 (0.012-0.119) | 0.034 (0.012-0.072) | 0.024 (0.010-0.048) | 0.018 (0.008-0.035) | 0.015 (0.005-0.033) |
| Bosnia and Herzegovina   | 0.064 (0.014-0.162) | 0.054 (0.018-0.113) | 0.048 (0.020-0.091) | 0.036 (0.017-0.065) | 0.030 (0.013-0.057) |
| Botswana                 | 0.151 (0.050-0.290) | 0.124 (0.050-0.226) | 0.093 (0.040-0.168) | 0.076 (0.034-0.140) | 0.063 (0.025-0.125) |
| Brazil                   | 0.102 (0.045-0.190) | 0.076 (0.046-0.119) | 0.059 (0.041-0.081) | 0.045 (0.032-0.060) | 0.034 (0.019-0.053) |
| Brunei Darussalam        | 0.163 (0.043-0.339) | 0.131 (0.043-0.258) | 0.104 (0.040-0.196) | 0.082 (0.031-0.159) | 0.071 (0.022-0.149) |
| Bulgaria                 | 0.033 (0.009-0.080) | 0.026 (0.009-0.054) | 0.025 (0.010-0.049) | 0.025 (0.010-0.050) | 0.026 (0.009-0.055) |
| Burkina Faso             | 0.189 (0.087-0.310) | 0.177 (0.103-0.265) | 0.166 (0.106-0.237) | 0.153 (0.100-0.217) | 0.141 (0.082-0.215) |
| Burundi                  | 0.171 (0.057-0.316) | 0.161 (0.065-0.279) | 0.151 (0.067-0.251) | 0.141 (0.068-0.228) | 0.129 (0.057-0.222) |
| Cabo Verde               | 0.149 (0.053-0.282) | 0.132 (0.059-0.227) | 0.110 (0.052-0.189) | 0.089 (0.043-0.152) | 0.075 (0.031-0.141) |
| Cambodia                 | 0.265 (0.139-0.402) | 0.246 (0.155-0.342) | 0.222 (0.144-0.302) | 0.193 (0.126-0.264) | 0.160 (0.093-0.241) |
| Cameroon                 | 0.120 (0.048-0.222) | 0.098 (0.051-0.159) | 0.087 (0.052-0.131) | 0.076 (0.047-0.112) | 0.064 (0.033-0.107) |
| Canada                   | 0.043 (0.020-0.079) | 0.030 (0.017-0.048) | 0.022 (0.013-0.035) | 0.017 (0.009-0.027) | 0.014 (0.006-0.026) |
| Central African Republic | 0.174 (0.065-0.307) | 0.164 (0.076-0.271) | 0.162 (0.084-0.257) | 0.156 (0.084-0.245) | 0.146 (0.067-0.244) |
| Chad                     | 0.194 (0.087-0.323) | 0.182 (0.100-0.278) | 0.172 (0.102-0.251) | 0.157 (0.094-0.231) | 0.142 (0.073-0.228) |
| Chile                    | 0.034 (0.010-0.083) | 0.025 (0.010-0.050) | 0.019 (0.009-0.033) | 0.013 (0.007-0.023) | 0.010 (0.004-0.019) |
| China                    | 0.146 (0.079-0.230) | 0.127 (0.096-0.162) | 0.107 (0.088-0.129) | 0.081 (0.064-0.101) | 0.060 (0.037-0.089) |
| China (Hong Kong SAR)    | 0.093 (0.027-0.203) | 0.079 (0.033-0.149) | 0.072 (0.033-0.126) | 0.067 (0.029-0.126) | 0.061 (0.019-0.137) |
| Colombia                 | 0.065 (0.022-0.137) | 0.049 (0.024-0.087) | 0.040 (0.022-0.064) | 0.033 (0.020-0.050) | 0.028 (0.014-0.049) |
| Comoros                  | 0.137 (0.052-0.255) | 0.127 (0.061-0.215) | 0.115 (0.060-0.189) | 0.105 (0.056-0.168) | 0.094 (0.045-0.159) |
| Congo                    | 0.175 (0.084-0.284) | 0.158 (0.095-0.230) | 0.146 (0.094-0.208) | 0.135 (0.084-0.195) | 0.122 (0.063-0.199) |
| Cook Islands             | 0.026 (0.007-0.067) | 0.017 (0.005-0.039) | 0.012 (0.004-0.025) | 0.008 (0.003-0.018) | 0.007 (0.002-0.016) |
| Costa Rica               | 0.076 (0.022-0.171) | 0.057 (0.023-0.110) | 0.041 (0.019-0.073) | 0.030 (0.015-0.052) | 0.024 (0.010-0.045) |
| Cote d'Ivoire            | 0.119 (0.047-0.225) | 0.107 (0.054-0.178) | 0.100 (0.055-0.156) | 0.088 (0.050-0.138) | 0.079 (0.040-0.136) |
| Croatia                  | 0.049 (0.014-0.112) | 0.038 (0.014-0.077) | 0.034 (0.013-0.066) | 0.028 (0.011-0.057) | 0.025 (0.008-0.056) |
| Cuba                     | 0.110 (0.041-0.211) | 0.085 (0.041-0.147) | 0.071 (0.038-0.117) | 0.059 (0.033-0.096) | 0.046 (0.022-0.083) |
| Cyprus                   | 0.048 (0.013-0.114) | 0.032 (0.011-0.070) | 0.025 (0.009-0.053) | 0.020 (0.007-0.042) | 0.017 (0.005-0.040) |
| Czech Republic           | 0.021 (0.007-0.046) | 0.017 (0.008-0.032) | 0.018 (0.009-0.031) | 0.018 (0.009-0.031) | 0.018 (0.007-0.036) |
| Denmark                  | 0.057 (0.025-0.104) | 0.045 (0.025-0.073) | 0.038 (0.021-0.061) | 0.034 (0.019-0.054) | 0.031 (0.015-0.055) |
| Djibouti                 | 0.131 (0.039-0.274) | 0.125 (0.043-0.249) | 0.123 (0.049-0.225) | 0.124 (0.050-0.223) | 0.116 (0.041-0.223) |
| Dominica                 | 0.097 (0.031-0.204) | 0.072 (0.029-0.138) | 0.052 (0.022-0.099) | 0.039 (0.016-0.075) | 0.031 (0.011-0.064) |
| Dominican Republic       | 0.107 (0.041-0.204) | 0.084 (0.043-0.139) | 0.068 (0.038-0.107) | 0.051 (0.028-0.085) | 0.040 (0.017-0.077) |
| DR Congo                 | 0.183 (0.075-0.311) | 0.171 (0.088-0.271) | 0.163 (0.092-0.249) | 0.157 (0.094-0.233) | 0.143 (0.073-0.228) |
| Ecuador                  | 0.042 (0.010-0.109) | 0.028 (0.009-0.064) | 0.021 (0.008-0.043) | 0.016 (0.006-0.032) | 0.013 (0.004-0.028) |
| Egypt                    | 0.041 (0.012-0.097) | 0.029 (0.013-0.053) | 0.021 (0.012-0.034) | 0.014 (0.008-0.022) | 0.009 (0.004-0.017) |
| El Salvador              | 0.072 (0.022-0.164) | 0.055 (0.022-0.108) | 0.042 (0.019-0.076) | 0.031 (0.015-0.056) | 0.024 (0.010-0.049) |
| Equatorial Guinea        | 0.161 (0.054-0.299) | 0.149 (0.064-0.259) | 0.136 (0.062-0.235) | 0.103 (0.043-0.190) | 0.084 (0.027-0.175) |
| Eritrea                  | 0.237 (0.124-0.363) | 0.229 (0.144-0.323) | 0.220 (0.146-0.300) | 0.207 (0.137-0.284) | 0.197 (0.117-0.288) |
| Estonia                  | 0.032 (0.010-0.070) | 0.029 (0.014-0.052) | 0.030 (0.017-0.048) | 0.027 (0.017-0.041) | 0.024 (0.013-0.040) |
| Ethiopia                 | 0.212 (0.097-0.344) | 0.203 (0.115-0.302) | 0.196 (0.122-0.280) | 0.188 (0.121-0.264) | 0.173 (0.099-0.260) |
| Fiji                     | 0.065 (0.018-0.160) | 0.047 (0.017-0.103) | 0.035 (0.014-0.069) | 0.026 (0.011-0.048) | 0.021 (0.008-0.042) |
| Finland                  | 0.041 (0.019-0.075) | 0.029 (0.017-0.045) | 0.023 (0.014-0.034) | 0.020 (0.013-0.029) | 0.019 (0.010-0.032) |
| France                   | 0.057 (0.024-0.107) | 0.047 (0.026-0.074) | 0.040 (0.023-0.062) | 0.034 (0.020-0.053) | 0.031 (0.015-0.055) |
| French Polynesia         | 0.031 (0.008-0.080) | 0.022 (0.007-0.049) | 0.016 (0.005-0.035) | 0.012 (0.004-0.026) | 0.010 (0.003-0.022) |
| Gabon                    | 0.125 (0.039-0.250) | 0.097 (0.038-0.183) | 0.083 (0.037-0.150) | 0.075 (0.035-0.130) | 0.070 (0.030-0.132) |

|                                  |                     |                     |                     |                     |                     |
|----------------------------------|---------------------|---------------------|---------------------|---------------------|---------------------|
| Gambia                           | 0.168 (0.071-0.291) | 0.153 (0.081-0.243) | 0.138 (0.079-0.209) | 0.121 (0.071-0.183) | 0.111 (0.058-0.183) |
| Georgia                          | 0.074 (0.020-0.176) | 0.055 (0.019-0.119) | 0.049 (0.019-0.100) | 0.041 (0.017-0.083) | 0.035 (0.013-0.074) |
| Germany                          | 0.039 (0.020-0.067) | 0.030 (0.020-0.042) | 0.025 (0.017-0.034) | 0.021 (0.014-0.031) | 0.020 (0.010-0.033) |
| Ghana                            | 0.123 (0.052-0.220) | 0.112 (0.063-0.171) | 0.098 (0.062-0.140) | 0.080 (0.051-0.117) | 0.066 (0.034-0.109) |
| Greece                           | 0.033 (0.011-0.076) | 0.024 (0.010-0.049) | 0.019 (0.008-0.038) | 0.016 (0.006-0.032) | 0.015 (0.005-0.033) |
| Greenland                        | 0.052 (0.017-0.109) | 0.038 (0.015-0.075) | 0.031 (0.013-0.060) | 0.026 (0.011-0.050) | 0.024 (0.009-0.049) |
| Grenada                          | 0.099 (0.032-0.208) | 0.078 (0.030-0.152) | 0.058 (0.024-0.112) | 0.041 (0.017-0.080) | 0.029 (0.010-0.062) |
| Guatemala                        | 0.067 (0.021-0.151) | 0.051 (0.020-0.099) | 0.038 (0.018-0.068) | 0.028 (0.014-0.050) | 0.022 (0.009-0.046) |
| Guinea                           | 0.153 (0.058-0.277) | 0.138 (0.067-0.225) | 0.131 (0.071-0.200) | 0.120 (0.070-0.182) | 0.112 (0.059-0.178) |
| Guinea Bissau                    | 0.155 (0.057-0.283) | 0.143 (0.065-0.240) | 0.126 (0.060-0.214) | 0.120 (0.060-0.199) | 0.112 (0.050-0.196) |
| Guyana                           | 0.116 (0.039-0.231) | 0.093 (0.037-0.176) | 0.075 (0.032-0.140) | 0.053 (0.022-0.101) | 0.041 (0.014-0.087) |
| Haiti                            | 0.162 (0.064-0.292) | 0.140 (0.069-0.235) | 0.121 (0.063-0.195) | 0.099 (0.052-0.163) | 0.082 (0.035-0.155) |
| Honduras                         | 0.087 (0.027-0.187) | 0.067 (0.027-0.128) | 0.051 (0.024-0.090) | 0.038 (0.019-0.067) | 0.030 (0.013-0.058) |
| Hungary                          | 0.040 (0.016-0.081) | 0.034 (0.017-0.059) | 0.033 (0.017-0.057) | 0.033 (0.015-0.060) | 0.033 (0.012-0.067) |
| Iceland                          | 0.035 (0.014-0.072) | 0.025 (0.012-0.045) | 0.022 (0.011-0.038) | 0.020 (0.009-0.036) | 0.018 (0.007-0.037) |
| India                            | 0.374 (0.283-0.471) | 0.349 (0.289-0.412) | 0.322 (0.280-0.363) | 0.287 (0.250-0.325) | 0.249 (0.191-0.311) |
| Indonesia                        | 0.262 (0.161-0.373) | 0.236 (0.168-0.309) | 0.202 (0.150-0.257) | 0.168 (0.123-0.218) | 0.136 (0.084-0.198) |
| Iran                             | 0.096 (0.039-0.183) | 0.072 (0.041-0.113) | 0.056 (0.037-0.078) | 0.042 (0.030-0.055) | 0.031 (0.018-0.048) |
| Iraq                             | 0.069 (0.020-0.156) | 0.053 (0.020-0.107) | 0.047 (0.019-0.093) | 0.040 (0.016-0.079) | 0.033 (0.012-0.071) |
| Ireland                          | 0.050 (0.019-0.103) | 0.034 (0.015-0.062) | 0.024 (0.011-0.043) | 0.017 (0.008-0.030) | 0.014 (0.006-0.027) |
| Israel                           | 0.028 (0.009-0.062) | 0.023 (0.010-0.043) | 0.019 (0.009-0.034) | 0.016 (0.007-0.029) | 0.015 (0.005-0.030) |
| Italy                            | 0.043 (0.020-0.077) | 0.035 (0.022-0.051) | 0.029 (0.020-0.041) | 0.023 (0.015-0.035) | 0.020 (0.010-0.034) |
| Jamaica                          | 0.098 (0.040-0.187) | 0.076 (0.040-0.123) | 0.060 (0.035-0.091) | 0.044 (0.025-0.069) | 0.034 (0.015-0.063) |
| Japan                            | 0.108 (0.077-0.145) | 0.099 (0.081-0.120) | 0.094 (0.078-0.112) | 0.094 (0.076-0.115) | 0.100 (0.068-0.140) |
| Jordan                           | 0.045 (0.014-0.104) | 0.030 (0.014-0.056) | 0.021 (0.011-0.035) | 0.015 (0.008-0.025) | 0.012 (0.006-0.022) |
| Kazakhstan                       | 0.082 (0.024-0.187) | 0.062 (0.023-0.129) | 0.050 (0.020-0.097) | 0.039 (0.016-0.077) | 0.028 (0.009-0.063) |
| Kenya                            | 0.171 (0.075-0.289) | 0.152 (0.082-0.236) | 0.133 (0.077-0.204) | 0.116 (0.066-0.180) | 0.099 (0.047-0.172) |
| Kiribati                         | 0.062 (0.022-0.132) | 0.042 (0.017-0.084) | 0.029 (0.011-0.060) | 0.019 (0.007-0.040) | 0.015 (0.004-0.036) |
| Kuwait                           | 0.031 (0.008-0.080) | 0.024 (0.010-0.046) | 0.021 (0.010-0.035) | 0.016 (0.008-0.027) | 0.013 (0.006-0.025) |
| Kyrgyzstan                       | 0.092 (0.027-0.206) | 0.072 (0.029-0.141) | 0.059 (0.027-0.107) | 0.048 (0.023-0.085) | 0.038 (0.016-0.074) |
| Lao PDR                          | 0.251 (0.132-0.380) | 0.229 (0.137-0.327) | 0.204 (0.125-0.289) | 0.172 (0.106-0.248) | 0.140 (0.076-0.218) |
| Latvia                           | 0.033 (0.008-0.081) | 0.028 (0.010-0.060) | 0.028 (0.011-0.057) | 0.026 (0.011-0.050) | 0.023 (0.008-0.048) |
| Lebanon                          | 0.066 (0.022-0.143) | 0.048 (0.020-0.093) | 0.033 (0.015-0.062) | 0.023 (0.010-0.046) | 0.022 (0.009-0.043) |
| Lesotho                          | 0.122 (0.038-0.250) | 0.102 (0.042-0.186) | 0.084 (0.040-0.147) | 0.069 (0.034-0.117) | 0.057 (0.025-0.105) |
| Liberia                          | 0.129 (0.047-0.242) | 0.114 (0.053-0.199) | 0.111 (0.050-0.194) | 0.101 (0.052-0.164) | 0.090 (0.043-0.153) |
| Libya                            | 0.056 (0.014-0.142) | 0.035 (0.013-0.074) | 0.028 (0.012-0.054) | 0.023 (0.010-0.044) | 0.020 (0.007-0.040) |
| Lithuania                        | 0.026 (0.007-0.061) | 0.020 (0.008-0.040) | 0.019 (0.009-0.036) | 0.018 (0.008-0.033) | 0.015 (0.006-0.033) |
| Luxembourg                       | 0.045 (0.015-0.100) | 0.035 (0.013-0.073) | 0.027 (0.010-0.058) | 0.023 (0.009-0.046) | 0.022 (0.008-0.046) |
| Macedonia (TFYR)                 | 0.045 (0.012-0.109) | 0.037 (0.013-0.078) | 0.035 (0.013-0.069) | 0.032 (0.012-0.065) | 0.029 (0.010-0.065) |
| Madagascar                       | 0.212 (0.103-0.335) | 0.198 (0.119-0.287) | 0.186 (0.120-0.262) | 0.177 (0.115-0.249) | 0.165 (0.093-0.251) |
| Malawi                           | 0.159 (0.065-0.282) | 0.145 (0.076-0.228) | 0.134 (0.080-0.201) | 0.120 (0.073-0.179) | 0.105 (0.054-0.174) |
| Malaysia                         | 0.215 (0.112-0.335) | 0.175 (0.107-0.256) | 0.136 (0.087-0.193) | 0.106 (0.071-0.147) | 0.086 (0.049-0.135) |
| Maldives                         | 0.206 (0.097-0.335) | 0.178 (0.099-0.270) | 0.148 (0.085-0.224) | 0.113 (0.062-0.179) | 0.089 (0.043-0.153) |
| Mali                             | 0.164 (0.071-0.283) | 0.152 (0.085-0.237) | 0.143 (0.086-0.212) | 0.130 (0.079-0.189) | 0.118 (0.064-0.187) |
| Malta                            | 0.031 (0.008-0.078) | 0.024 (0.009-0.050) | 0.020 (0.008-0.041) | 0.016 (0.006-0.035) | 0.015 (0.004-0.035) |
| Marshall Islands                 | 0.030 (0.008-0.078) | 0.021 (0.007-0.048) | 0.015 (0.006-0.033) | 0.012 (0.004-0.026) | 0.011 (0.003-0.026) |
| Mauritania                       | 0.153 (0.060-0.280) | 0.135 (0.065-0.228) | 0.122 (0.061-0.202) | 0.110 (0.056-0.182) | 0.098 (0.044-0.176) |
| Mauritius                        | 0.125 (0.052-0.223) | 0.108 (0.058-0.170) | 0.089 (0.050-0.138) | 0.070 (0.038-0.112) | 0.056 (0.024-0.104) |
| Mexico                           | 0.057 (0.020-0.123) | 0.040 (0.020-0.072) | 0.030 (0.018-0.047) | 0.022 (0.014-0.033) | 0.017 (0.009-0.030) |
| Micronesia (Federated States of) | 0.052 (0.015-0.121) | 0.036 (0.014-0.071) | 0.025 (0.011-0.049) | 0.018 (0.008-0.033) | 0.013 (0.005-0.027) |
| Moldova                          | 0.043 (0.011-0.107) | 0.035 (0.013-0.076) | 0.034 (0.014-0.069) | 0.035 (0.015-0.068) | 0.030 (0.012-0.062) |
| Mongolia                         | 0.077 (0.022-0.178) | 0.060 (0.024-0.120) | 0.050 (0.024-0.088) | 0.042 (0.022-0.070) | 0.034 (0.016-0.062) |
| Montenegro                       | 0.052 (0.012-0.132) | 0.038 (0.011-0.087) | 0.033 (0.011-0.070) | 0.029 (0.010-0.062) | 0.026 (0.008-0.061) |
| Morocco                          | 0.099 (0.033-0.208) | 0.077 (0.034-0.140) | 0.060 (0.030-0.104) | 0.047 (0.023-0.083) | 0.037 (0.015-0.072) |
| Mozambique                       | 0.161 (0.060-0.293) | 0.149 (0.072-0.245) | 0.138 (0.076-0.214) | 0.129 (0.074-0.195) | 0.118 (0.058-0.194) |
| Myanmar                          | 0.255 (0.116-0.411) | 0.236 (0.134-0.345) | 0.213 (0.132-0.297) | 0.185 (0.121-0.257) | 0.148 (0.086-0.223) |
| Namibia                          | 0.157 (0.056-0.293) | 0.139 (0.067-0.227) | 0.124 (0.069-0.193) | 0.104 (0.061-0.159) | 0.087 (0.045-0.145) |
| Nauru                            | 0.007 (0.002-0.018) | 0.006 (0.002-0.012) | 0.005 (0.002-0.011) | 0.006 (0.002-0.012) | 0.006 (0.001-0.014) |
| Nepal                            | 0.316 (0.194-0.440) | 0.296 (0.202-0.391) | 0.268 (0.191-0.345) | 0.231 (0.165-0.298) | 0.190 (0.121-0.269) |
| Netherlands                      | 0.050 (0.021-0.095) | 0.038 (0.020-0.062) | 0.030 (0.017-0.047) | 0.024 (0.014-0.038) | 0.022 (0.011-0.039) |
| New Zealand                      | 0.047 (0.021-0.089) | 0.034 (0.019-0.055) | 0.025 (0.015-0.039) | 0.019 (0.012-0.029) | 0.016 (0.009-0.027) |
| Nicaragua                        | 0.067 (0.021-0.148) | 0.052 (0.022-0.101) | 0.044 (0.021-0.079) | 0.034 (0.017-0.061) | 0.028 (0.012-0.057) |
| Niger                            | 0.189 (0.087-0.311) | 0.177 (0.102-0.267) | 0.169 (0.104-0.242) | 0.158 (0.099-0.226) | 0.144 (0.079-0.223) |
| Nigeria                          | 0.169 (0.080-0.281) | 0.152 (0.095-0.219) | 0.138 (0.095-0.187) | 0.117 (0.082-0.158) | 0.094 (0.057-0.139) |
| Niue                             | 0.039 (0.010-0.102) | 0.023 (0.007-0.054) | 0.015 (0.005-0.034) | 0.010 (0.003-0.022) | 0.007 (0.002-0.016) |
| North Korea                      | 0.140 (0.047-0.277) | 0.120 (0.048-0.225) | 0.110 (0.045-0.206) | 0.111 (0.041-0.212) | 0.108 (0.032-0.228) |
| Norway                           | 0.066 (0.030-0.120) | 0.045 (0.026-0.071) | 0.034 (0.021-0.053) | 0.028 (0.016-0.043) | 0.025 (0.012-0.044) |
| Occupied Palestinian Territory   | 0.038 (0.011-0.091) | 0.028 (0.012-0.057) | 0.023 (0.010-0.042) | 0.018 (0.008-0.033) | 0.016 (0.006-0.033) |
| Oman                             | 0.139 (0.054-0.262) | 0.097 (0.051-0.162) | 0.070 (0.041-0.111) | 0.055 (0.032-0.088) | 0.045 (0.021-0.082) |



|                                  |                     |                     |                     |                     |                     |
|----------------------------------|---------------------|---------------------|---------------------|---------------------|---------------------|
| Pakistan                         | 0.287 (0.177-0.403) | 0.259 (0.180-0.346) | 0.227 (0.163-0.296) | 0.194 (0.134-0.259) | 0.163 (0.097-0.242) |
| Palau                            | 0.026 (0.006-0.068) | 0.019 (0.006-0.043) | 0.014 (0.005-0.031) | 0.011 (0.004-0.025) | 0.010 (0.003-0.023) |
| Panama                           | 0.069 (0.020-0.161) | 0.051 (0.020-0.103) | 0.040 (0.018-0.074) | 0.030 (0.014-0.055) | 0.024 (0.010-0.046) |
| Papua New Guinea                 | 0.099 (0.027-0.226) | 0.077 (0.027-0.162) | 0.060 (0.023-0.121) | 0.046 (0.018-0.092) | 0.035 (0.011-0.078) |
| Paraguay                         | 0.079 (0.020-0.185) | 0.059 (0.018-0.131) | 0.044 (0.015-0.097) | 0.032 (0.011-0.070) | 0.024 (0.007-0.055) |
| Peru                             | 0.036 (0.010-0.089) | 0.026 (0.011-0.053) | 0.021 (0.011-0.035) | 0.016 (0.009-0.024) | 0.012 (0.006-0.020) |
| Philippines                      | 0.252 (0.160-0.350) | 0.219 (0.165-0.278) | 0.188 (0.143-0.237) | 0.164 (0.121-0.214) | 0.143 (0.084-0.212) |
| Poland                           | 0.033 (0.012-0.065) | 0.028 (0.015-0.046) | 0.027 (0.015-0.042) | 0.025 (0.014-0.039) | 0.023 (0.011-0.041) |
| Portugal                         | 0.054 (0.017-0.116) | 0.043 (0.019-0.080) | 0.032 (0.016-0.055) | 0.023 (0.012-0.040) | 0.019 (0.008-0.038) |
| Puerto Rico                      | 0.079 (0.026-0.166) | 0.055 (0.023-0.104) | 0.039 (0.018-0.073) | 0.031 (0.015-0.055) | 0.027 (0.011-0.052) |
| Qatar                            | 0.050 (0.015-0.121) | 0.034 (0.012-0.072) | 0.028 (0.012-0.054) | 0.021 (0.009-0.040) | 0.018 (0.007-0.036) |
| Romania                          | 0.049 (0.015-0.109) | 0.036 (0.015-0.072) | 0.033 (0.015-0.062) | 0.031 (0.014-0.059) | 0.028 (0.010-0.059) |
| Russian Federation               | 0.030 (0.012-0.059) | 0.026 (0.016-0.039) | 0.027 (0.019-0.037) | 0.027 (0.018-0.039) | 0.025 (0.012-0.044) |
| Rwanda                           | 0.136 (0.044-0.263) | 0.123 (0.049-0.218) | 0.114 (0.054-0.188) | 0.102 (0.053-0.165) | 0.090 (0.043-0.153) |
| Saint Kitts and Nevis            | 0.088 (0.026-0.191) | 0.064 (0.024-0.131) | 0.048 (0.019-0.093) | 0.034 (0.013-0.069) | 0.025 (0.007-0.058) |
| Saint Lucia                      | 0.100 (0.038-0.192) | 0.078 (0.038-0.136) | 0.060 (0.030-0.101) | 0.042 (0.020-0.076) | 0.030 (0.011-0.064) |
| Saint Vincent and the Grenadines | 0.110 (0.033-0.229) | 0.086 (0.031-0.170) | 0.065 (0.025-0.125) | 0.047 (0.018-0.094) | 0.034 (0.010-0.075) |
| Samoa                            | 0.024 (0.007-0.060) | 0.015 (0.005-0.032) | 0.010 (0.004-0.020) | 0.006 (0.002-0.012) | 0.004 (0.001-0.009) |
| Sao Tome and Principe            | 0.135 (0.052-0.253) | 0.122 (0.057-0.210) | 0.105 (0.052-0.179) | 0.089 (0.046-0.150) | 0.076 (0.034-0.137) |
| Saudi Arabia                     | 0.069 (0.023-0.146) | 0.043 (0.023-0.072) | 0.033 (0.020-0.050) | 0.027 (0.016-0.041) | 0.022 (0.010-0.038) |
| Senegal                          | 0.161 (0.074-0.272) | 0.154 (0.089-0.233) | 0.145 (0.088-0.211) | 0.132 (0.080-0.195) | 0.119 (0.061-0.191) |
| Serbia                           | 0.049 (0.017-0.104) | 0.040 (0.019-0.070) | 0.037 (0.020-0.060) | 0.034 (0.019-0.056) | 0.032 (0.015-0.058) |
| Seychelles                       | 0.102 (0.038-0.196) | 0.079 (0.037-0.138) | 0.063 (0.031-0.106) | 0.047 (0.023-0.080) | 0.038 (0.015-0.072) |
| Sierra Leone                     | 0.147 (0.058-0.270) | 0.137 (0.066-0.227) | 0.131 (0.069-0.207) | 0.122 (0.068-0.186) | 0.106 (0.054-0.171) |
| Singapore                        | 0.113 (0.051-0.202) | 0.097 (0.058-0.146) | 0.088 (0.055-0.128) | 0.084 (0.054-0.121) | 0.079 (0.045-0.124) |
| Slovakia                         | 0.048 (0.016-0.104) | 0.037 (0.017-0.068) | 0.032 (0.017-0.055) | 0.030 (0.017-0.050) | 0.028 (0.013-0.052) |
| Slovenia                         | 0.052 (0.014-0.123) | 0.039 (0.014-0.083) | 0.034 (0.013-0.068) | 0.028 (0.011-0.058) | 0.026 (0.009-0.058) |
| Solomon Islands                  | 0.079 (0.018-0.196) | 0.058 (0.018-0.133) | 0.043 (0.016-0.091) | 0.033 (0.013-0.066) | 0.026 (0.009-0.056) |
| Somalia                          | 0.164 (0.059-0.305) | 0.157 (0.068-0.271) | 0.152 (0.071-0.256) | 0.147 (0.069-0.250) | 0.141 (0.059-0.253) |
| South Africa                     | 0.067 (0.023-0.137) | 0.056 (0.028-0.093) | 0.047 (0.028-0.070) | 0.039 (0.026-0.056) | 0.033 (0.019-0.050) |
| South Korea                      | 0.135 (0.064-0.231) | 0.098 (0.061-0.144) | 0.074 (0.049-0.104) | 0.064 (0.045-0.086) | 0.052 (0.032-0.079) |
| Spain                            | 0.032 (0.014-0.062) | 0.024 (0.013-0.039) | 0.019 (0.011-0.029) | 0.015 (0.009-0.025) | 0.014 (0.006-0.025) |
| Sri Lanka                        | 0.243 (0.129-0.372) | 0.214 (0.132-0.304) | 0.186 (0.120-0.259) | 0.151 (0.097-0.216) | 0.119 (0.060-0.195) |
| Sudan                            | 0.144 (0.052-0.269) | 0.129 (0.058-0.224) | 0.117 (0.055-0.200) | 0.103 (0.048-0.178) | 0.090 (0.037-0.166) |
| Suriname                         | 0.091 (0.026-0.195) | 0.068 (0.024-0.137) | 0.058 (0.022-0.114) | 0.045 (0.017-0.090) | 0.036 (0.011-0.078) |
| Swaziland                        | 0.121 (0.034-0.256) | 0.098 (0.035-0.189) | 0.078 (0.030-0.148) | 0.061 (0.024-0.116) | 0.048 (0.016-0.102) |
| Sweden                           | 0.044 (0.019-0.084) | 0.035 (0.021-0.054) | 0.030 (0.019-0.043) | 0.025 (0.015-0.038) | 0.022 (0.011-0.038) |
| Switzerland                      | 0.071 (0.028-0.137) | 0.052 (0.026-0.087) | 0.040 (0.022-0.066) | 0.037 (0.020-0.061) | 0.035 (0.016-0.063) |
| Syrian Arab Republic             | 0.079 (0.025-0.176) | 0.056 (0.022-0.112) | 0.046 (0.020-0.086) | 0.034 (0.014-0.065) | 0.027 (0.009-0.057) |
| Taiwan                           | 0.156 (0.073-0.256) | 0.117 (0.068-0.175) | 0.086 (0.054-0.126) | 0.071 (0.043-0.105) | 0.067 (0.032-0.119) |
| Tajikistan                       | 0.098 (0.028-0.216) | 0.080 (0.030-0.163) | 0.069 (0.029-0.134) | 0.061 (0.027-0.116) | 0.048 (0.018-0.099) |
| Tanzania                         | 0.163 (0.070-0.278) | 0.147 (0.081-0.222) | 0.135 (0.085-0.192) | 0.124 (0.082-0.175) | 0.109 (0.064-0.167) |
| Thailand                         | 0.210 (0.110-0.325) | 0.177 (0.111-0.252) | 0.144 (0.096-0.198) | 0.112 (0.074-0.156) | 0.091 (0.049-0.147) |
| Timor-Leste                      | 0.272 (0.149-0.396) | 0.258 (0.160-0.358) | 0.239 (0.151-0.328) | 0.218 (0.138-0.300) | 0.195 (0.110-0.288) |
| Togo                             | 0.146 (0.057-0.262) | 0.134 (0.067-0.219) | 0.123 (0.066-0.195) | 0.110 (0.061-0.171) | 0.097 (0.050-0.162) |
| Tokelau                          | 0.043 (0.007-0.131) | 0.026 (0.006-0.067) | 0.016 (0.005-0.038) | 0.010 (0.003-0.023) | 0.007 (0.001-0.017) |
| Tonga                            | 0.019 (0.004-0.052) | 0.011 (0.003-0.027) | 0.007 (0.002-0.016) | 0.005 (0.001-0.010) | 0.003 (0.001-0.008) |
| Trinidad and Tobago              | 0.096 (0.025-0.218) | 0.070 (0.023-0.146) | 0.053 (0.021-0.101) | 0.035 (0.013-0.070) | 0.023 (0.006-0.058) |
| Tunisia                          | 0.094 (0.033-0.193) | 0.069 (0.032-0.121) | 0.052 (0.027-0.087) | 0.040 (0.021-0.066) | 0.031 (0.014-0.058) |
| Turkey                           | 0.058 (0.022-0.122) | 0.041 (0.023-0.068) | 0.029 (0.019-0.043) | 0.021 (0.014-0.031) | 0.016 (0.009-0.027) |
| Turkmenistan                     | 0.088 (0.025-0.199) | 0.071 (0.027-0.145) | 0.057 (0.024-0.109) | 0.047 (0.021-0.088) | 0.035 (0.014-0.072) |
| Tuvalu                           | 0.033 (0.009-0.081) | 0.022 (0.007-0.047) | 0.014 (0.005-0.031) | 0.010 (0.003-0.022) | 0.008 (0.002-0.019) |
| Uganda                           | 0.157 (0.061-0.277) | 0.142 (0.068-0.232) | 0.128 (0.069-0.203) | 0.116 (0.064-0.180) | 0.104 (0.054-0.170) |
| Ukraine                          | 0.030 (0.007-0.080) | 0.026 (0.008-0.059) | 0.026 (0.009-0.056) | 0.027 (0.009-0.059) | 0.024 (0.007-0.057) |
| United Arab Emirates             | 0.054 (0.013-0.135) | 0.036 (0.014-0.072) | 0.027 (0.013-0.050) | 0.022 (0.010-0.040) | 0.021 (0.008-0.041) |
| United Kingdom                   | 0.046 (0.023-0.082) | 0.034 (0.023-0.048) | 0.026 (0.019-0.034) | 0.021 (0.015-0.027) | 0.018 (0.011-0.026) |
| United States of America         | 0.049 (0.027-0.080) | 0.035 (0.023-0.051) | 0.026 (0.018-0.038) | 0.021 (0.014-0.030) | 0.019 (0.011-0.030) |
| Uruguay                          | 0.042 (0.011-0.106) | 0.033 (0.012-0.072) | 0.027 (0.011-0.053) | 0.020 (0.009-0.039) | 0.015 (0.005-0.032) |
| Uzbekistan                       | 0.092 (0.026-0.212) | 0.072 (0.027-0.149) | 0.059 (0.025-0.114) | 0.049 (0.021-0.096) | 0.038 (0.013-0.082) |
| Vanuatu                          | 0.084 (0.021-0.196) | 0.061 (0.022-0.127) | 0.045 (0.019-0.084) | 0.034 (0.015-0.062) | 0.026 (0.010-0.054) |
| Venezuela                        | 0.036 (0.010-0.087) | 0.027 (0.010-0.054) | 0.021 (0.009-0.039) | 0.017 (0.008-0.030) | 0.014 (0.005-0.028) |
| Viet Nam                         | 0.310 (0.200-0.418) | 0.293 (0.222-0.365) | 0.268 (0.214-0.321) | 0.229 (0.185-0.276) | 0.186 (0.126-0.253) |
| Yemen                            | 0.168 (0.061-0.310) | 0.143 (0.067-0.241) | 0.120 (0.063-0.197) | 0.098 (0.052-0.162) | 0.083 (0.039-0.148) |
| Zambia                           | 0.142 (0.058-0.256) | 0.126 (0.067-0.201) | 0.119 (0.070-0.178) | 0.108 (0.066-0.160) | 0.094 (0.051-0.153) |
| Zimbabwe                         | 0.105 (0.036-0.209) | 0.085 (0.040-0.148) | 0.071 (0.039-0.116) | 0.062 (0.034-0.100) | 0.056 (0.026-0.105) |

Men, 18.5 ≤ BMI < 20 kg/m<sup>2</sup>

| Country                  | Year                |                     |                     |                     |                     |
|--------------------------|---------------------|---------------------|---------------------|---------------------|---------------------|
|                          | 1975                | 1985                | 1995                | 2005                | 2014                |
| Afghanistan              | 0.215 (0.113-0.335) | 0.204 (0.123-0.298) | 0.196 (0.124-0.278) | 0.190 (0.122-0.265) | 0.176 (0.102-0.259) |
| Albania                  | 0.095 (0.042-0.178) | 0.076 (0.040-0.125) | 0.061 (0.034-0.096) | 0.041 (0.024-0.064) | 0.026 (0.013-0.047) |
| Algeria                  | 0.132 (0.067-0.224) | 0.107 (0.065-0.165) | 0.086 (0.054-0.128) | 0.071 (0.045-0.106) | 0.055 (0.031-0.092) |
| American Samoa           | 0.016 (0.006-0.030) | 0.011 (0.005-0.020) | 0.008 (0.004-0.015) | 0.007 (0.003-0.012) | 0.006 (0.002-0.012) |
| Andorra                  | 0.053 (0.023-0.098) | 0.035 (0.018-0.059) | 0.025 (0.014-0.043) | 0.017 (0.010-0.029) | 0.014 (0.007-0.027) |
| Angola                   | 0.250 (0.130-0.380) | 0.232 (0.140-0.339) | 0.214 (0.133-0.309) | 0.199 (0.121-0.289) | 0.170 (0.089-0.276) |
| Antigua and Barbuda      | 0.125 (0.059-0.217) | 0.106 (0.059-0.168) | 0.080 (0.044-0.128) | 0.065 (0.034-0.105) | 0.047 (0.020-0.089) |
| Argentina                | 0.057 (0.025-0.105) | 0.044 (0.024-0.074) | 0.036 (0.021-0.056) | 0.027 (0.016-0.042) | 0.021 (0.011-0.035) |
| Armenia                  | 0.089 (0.033-0.181) | 0.073 (0.034-0.135) | 0.066 (0.033-0.116) | 0.054 (0.028-0.090) | 0.035 (0.016-0.066) |
| Australia                | 0.054 (0.032-0.085) | 0.039 (0.028-0.054) | 0.030 (0.021-0.041) | 0.022 (0.016-0.030) | 0.016 (0.010-0.025) |
| Austria                  | 0.074 (0.039-0.123) | 0.052 (0.032-0.078) | 0.037 (0.024-0.055) | 0.028 (0.018-0.042) | 0.021 (0.011-0.037) |
| Azerbaijan               | 0.095 (0.041-0.178) | 0.075 (0.038-0.130) | 0.064 (0.033-0.108) | 0.054 (0.028-0.088) | 0.034 (0.015-0.063) |
| Bahamas                  | 0.099 (0.046-0.173) | 0.079 (0.042-0.127) | 0.059 (0.032-0.095) | 0.044 (0.024-0.071) | 0.035 (0.016-0.062) |
| Bahrain                  | 0.088 (0.039-0.159) | 0.067 (0.039-0.107) | 0.051 (0.032-0.079) | 0.038 (0.024-0.058) | 0.029 (0.015-0.051) |
| Bangladesh               | 0.219 (0.125-0.331) | 0.210 (0.142-0.286) | 0.200 (0.145-0.261) | 0.187 (0.138-0.243) | 0.170 (0.110-0.241) |
| Barbados                 | 0.128 (0.064-0.212) | 0.103 (0.062-0.156) | 0.087 (0.055-0.128) | 0.067 (0.041-0.101) | 0.051 (0.024-0.090) |
| Belarus                  | 0.086 (0.039-0.156) | 0.063 (0.033-0.105) | 0.050 (0.027-0.082) | 0.038 (0.021-0.062) | 0.024 (0.011-0.045) |
| Belgium                  | 0.053 (0.027-0.090) | 0.037 (0.025-0.054) | 0.026 (0.018-0.036) | 0.018 (0.012-0.026) | 0.014 (0.008-0.023) |
| Belize                   | 0.132 (0.061-0.234) | 0.116 (0.066-0.182) | 0.102 (0.061-0.152) | 0.081 (0.049-0.122) | 0.068 (0.034-0.114) |
| Benin                    | 0.222 (0.121-0.346) | 0.206 (0.131-0.291) | 0.194 (0.131-0.263) | 0.181 (0.126-0.240) | 0.167 (0.106-0.237) |
| Bermuda                  | 0.068 (0.027-0.132) | 0.052 (0.025-0.092) | 0.039 (0.020-0.070) | 0.032 (0.017-0.055) | 0.023 (0.010-0.044) |
| Bhutan                   | 0.228 (0.124-0.355) | 0.215 (0.136-0.307) | 0.195 (0.129-0.268) | 0.169 (0.112-0.232) | 0.140 (0.084-0.211) |
| Bolivia                  | 0.107 (0.044-0.203) | 0.086 (0.042-0.152) | 0.071 (0.036-0.121) | 0.056 (0.029-0.095) | 0.045 (0.021-0.081) |
| Bosnia and Herzegovina   | 0.097 (0.034-0.210) | 0.081 (0.037-0.149) | 0.067 (0.035-0.113) | 0.041 (0.023-0.066) | 0.027 (0.014-0.046) |
| Botswana                 | 0.238 (0.132-0.359) | 0.215 (0.137-0.304) | 0.174 (0.109-0.248) | 0.148 (0.093-0.216) | 0.120 (0.066-0.188) |
| Brazil                   | 0.123 (0.066-0.203) | 0.096 (0.063-0.139) | 0.075 (0.053-0.101) | 0.056 (0.040-0.074) | 0.041 (0.024-0.063) |
| Brunei Darussalam        | 0.190 (0.076-0.336) | 0.156 (0.075-0.261) | 0.123 (0.067-0.194) | 0.093 (0.052-0.146) | 0.074 (0.035-0.131) |
| Bulgaria                 | 0.068 (0.031-0.127) | 0.045 (0.024-0.075) | 0.034 (0.019-0.055) | 0.028 (0.016-0.045) | 0.020 (0.010-0.037) |
| Burkina Faso             | 0.239 (0.128-0.369) | 0.228 (0.149-0.320) | 0.215 (0.149-0.286) | 0.196 (0.140-0.261) | 0.182 (0.115-0.259) |
| Burundi                  | 0.285 (0.151-0.432) | 0.270 (0.163-0.388) | 0.252 (0.159-0.352) | 0.240 (0.156-0.332) | 0.227 (0.138-0.328) |
| Cabo Verde               | 0.225 (0.118-0.354) | 0.207 (0.131-0.292) | 0.182 (0.120-0.252) | 0.146 (0.097-0.205) | 0.121 (0.068-0.187) |
| Cambodia                 | 0.257 (0.142-0.384) | 0.252 (0.171-0.338) | 0.239 (0.168-0.313) | 0.219 (0.156-0.288) | 0.191 (0.122-0.272) |
| Cameroon                 | 0.220 (0.125-0.334) | 0.200 (0.135-0.278) | 0.183 (0.128-0.243) | 0.168 (0.123-0.221) | 0.151 (0.094-0.217) |
| Canada                   | 0.049 (0.027-0.082) | 0.035 (0.022-0.050) | 0.026 (0.016-0.037) | 0.018 (0.011-0.026) | 0.014 (0.008-0.023) |
| Central African Republic | 0.231 (0.116-0.367) | 0.222 (0.126-0.334) | 0.217 (0.135-0.313) | 0.212 (0.136-0.299) | 0.202 (0.117-0.303) |
| Chad                     | 0.228 (0.128-0.352) | 0.215 (0.137-0.306) | 0.201 (0.137-0.276) | 0.185 (0.128-0.252) | 0.172 (0.105-0.251) |
| Chile                    | 0.068 (0.029-0.132) | 0.053 (0.028-0.086) | 0.040 (0.024-0.061) | 0.028 (0.017-0.042) | 0.020 (0.011-0.035) |
| China                    | 0.207 (0.128-0.301) | 0.193 (0.154-0.235) | 0.164 (0.139-0.191) | 0.117 (0.095-0.141) | 0.076 (0.050-0.108) |
| China (Hong Kong SAR)    | 0.120 (0.048-0.218) | 0.100 (0.053-0.164) | 0.079 (0.046-0.126) | 0.062 (0.034-0.101) | 0.043 (0.018-0.085) |
| Colombia                 | 0.101 (0.048-0.179) | 0.081 (0.047-0.126) | 0.066 (0.042-0.098) | 0.053 (0.035-0.076) | 0.042 (0.024-0.068) |
| Comoros                  | 0.217 (0.117-0.334) | 0.207 (0.129-0.295) | 0.195 (0.127-0.271) | 0.186 (0.124-0.254) | 0.175 (0.109-0.252) |
| Congo                    | 0.230 (0.132-0.342) | 0.211 (0.136-0.298) | 0.193 (0.126-0.270) | 0.179 (0.117-0.251) | 0.158 (0.088-0.244) |
| Cook Islands             | 0.020 (0.007-0.043) | 0.016 (0.007-0.028) | 0.011 (0.005-0.020) | 0.008 (0.003-0.014) | 0.006 (0.002-0.011) |
| Costa Rica               | 0.107 (0.050-0.191) | 0.082 (0.046-0.133) | 0.062 (0.037-0.097) | 0.046 (0.028-0.068) | 0.034 (0.018-0.057) |
| Cote d'Ivoire            | 0.208 (0.113-0.318) | 0.190 (0.121-0.271) | 0.175 (0.118-0.243) | 0.159 (0.109-0.215) | 0.142 (0.085-0.209) |
| Croatia                  | 0.087 (0.039-0.162) | 0.061 (0.033-0.102) | 0.046 (0.026-0.074) | 0.030 (0.017-0.049) | 0.018 (0.009-0.034) |
| Cuba                     | 0.120 (0.061-0.200) | 0.097 (0.058-0.146) | 0.083 (0.052-0.124) | 0.076 (0.048-0.112) | 0.058 (0.031-0.095) |
| Cyprus                   | 0.081 (0.037-0.148) | 0.056 (0.030-0.092) | 0.036 (0.020-0.059) | 0.025 (0.014-0.040) | 0.019 (0.009-0.036) |
| Czech Republic           | 0.043 (0.021-0.079) | 0.030 (0.018-0.048) | 0.024 (0.014-0.036) | 0.018 (0.011-0.027) | 0.013 (0.006-0.023) |
| Denmark                  | 0.070 (0.042-0.109) | 0.048 (0.032-0.067) | 0.033 (0.022-0.047) | 0.024 (0.015-0.035) | 0.019 (0.010-0.031) |
| Djibouti                 | 0.179 (0.083-0.303) | 0.167 (0.084-0.275) | 0.159 (0.091-0.244) | 0.155 (0.092-0.235) | 0.144 (0.074-0.235) |
| Dominica                 | 0.138 (0.067-0.232) | 0.114 (0.067-0.177) | 0.090 (0.054-0.138) | 0.069 (0.041-0.107) | 0.054 (0.027-0.094) |
| Dominican Republic       | 0.152 (0.079-0.250) | 0.128 (0.078-0.189) | 0.108 (0.069-0.155) | 0.080 (0.051-0.116) | 0.060 (0.031-0.098) |
| DR Congo                 | 0.237 (0.128-0.359) | 0.223 (0.134-0.326) | 0.213 (0.134-0.307) | 0.212 (0.137-0.297) | 0.201 (0.113-0.302) |
| Ecuador                  | 0.106 (0.044-0.200) | 0.079 (0.037-0.137) | 0.062 (0.031-0.103) | 0.048 (0.026-0.078) | 0.036 (0.017-0.064) |
| Egypt                    | 0.104 (0.050-0.188) | 0.083 (0.051-0.126) | 0.068 (0.044-0.097) | 0.053 (0.035-0.075) | 0.040 (0.022-0.063) |
| El Salvador              | 0.105 (0.047-0.191) | 0.085 (0.045-0.139) | 0.069 (0.039-0.110) | 0.053 (0.030-0.082) | 0.042 (0.021-0.072) |
| Equatorial Guinea        | 0.235 (0.115-0.369) | 0.223 (0.128-0.333) | 0.208 (0.124-0.306) | 0.163 (0.087-0.255) | 0.130 (0.054-0.237) |
| Eritrea                  | 0.230 (0.131-0.344) | 0.220 (0.145-0.307) | 0.208 (0.145-0.279) | 0.196 (0.140-0.260) | 0.188 (0.120-0.264) |
| Estonia                  | 0.070 (0.035-0.126) | 0.053 (0.032-0.080) | 0.043 (0.028-0.063) | 0.031 (0.020-0.043) | 0.021 (0.012-0.034) |
| Ethiopia                 | 0.235 (0.128-0.359) | 0.226 (0.145-0.320) | 0.219 (0.152-0.296) | 0.217 (0.157-0.285) | 0.206 (0.137-0.286) |
| Fiji                     | 0.072 (0.026-0.147) | 0.056 (0.024-0.104) | 0.045 (0.021-0.081) | 0.035 (0.018-0.061) | 0.029 (0.014-0.053) |
| Finland                  | 0.065 (0.036-0.105) | 0.042 (0.029-0.059) | 0.029 (0.020-0.040) | 0.022 (0.015-0.030) | 0.017 (0.010-0.027) |
| France                   | 0.055 (0.028-0.094) | 0.039 (0.024-0.060) | 0.029 (0.018-0.043) | 0.021 (0.013-0.032) | 0.018 (0.009-0.030) |
| French Polynesia         | 0.020 (0.007-0.045) | 0.014 (0.006-0.030) | 0.010 (0.004-0.020) | 0.007 (0.003-0.013) | 0.005 (0.002-0.011) |
| Gabon                    | 0.229 (0.113-0.363) | 0.185 (0.100-0.286) | 0.155 (0.087-0.242) | 0.131 (0.073-0.208) | 0.113 (0.056-0.193) |
| Gambia                   | 0.217 (0.120-0.335) | 0.204 (0.134-0.287) | 0.184 (0.125-0.252) | 0.164 (0.113-0.224) | 0.149 (0.089-0.222) |

|                                  |                     |                     |                     |                     |                     |
|----------------------------------|---------------------|---------------------|---------------------|---------------------|---------------------|
| Georgia                          | 0.093 (0.040-0.179) | 0.073 (0.036-0.128) | 0.065 (0.033-0.110) | 0.053 (0.028-0.089) | 0.039 (0.019-0.071) |
| Germany                          | 0.058 (0.034-0.092) | 0.039 (0.028-0.051) | 0.028 (0.020-0.036) | 0.021 (0.015-0.029) | 0.016 (0.009-0.026) |
| Ghana                            | 0.204 (0.113-0.313) | 0.191 (0.125-0.269) | 0.177 (0.124-0.237) | 0.157 (0.109-0.211) | 0.134 (0.080-0.200) |
| Greece                           | 0.065 (0.031-0.118) | 0.043 (0.025-0.070) | 0.031 (0.018-0.049) | 0.022 (0.013-0.036) | 0.018 (0.008-0.032) |
| Greenland                        | 0.071 (0.037-0.122) | 0.046 (0.028-0.074) | 0.032 (0.019-0.052) | 0.024 (0.014-0.038) | 0.018 (0.009-0.031) |
| Grenada                          | 0.139 (0.067-0.235) | 0.121 (0.070-0.187) | 0.098 (0.058-0.149) | 0.076 (0.045-0.116) | 0.056 (0.028-0.098) |
| Guatemala                        | 0.116 (0.055-0.205) | 0.097 (0.054-0.154) | 0.081 (0.048-0.123) | 0.062 (0.038-0.094) | 0.050 (0.026-0.086) |
| Guinea                           | 0.223 (0.115-0.356) | 0.210 (0.132-0.304) | 0.199 (0.134-0.275) | 0.185 (0.129-0.248) | 0.174 (0.110-0.248) |
| Guinea Bissau                    | 0.224 (0.121-0.344) | 0.211 (0.135-0.302) | 0.192 (0.125-0.270) | 0.182 (0.123-0.251) | 0.172 (0.103-0.253) |
| Guyana                           | 0.143 (0.072-0.240) | 0.124 (0.073-0.193) | 0.111 (0.068-0.167) | 0.087 (0.051-0.134) | 0.073 (0.036-0.125) |
| Haiti                            | 0.180 (0.091-0.297) | 0.164 (0.096-0.248) | 0.149 (0.089-0.220) | 0.130 (0.077-0.196) | 0.113 (0.056-0.192) |
| Honduras                         | 0.128 (0.060-0.230) | 0.107 (0.060-0.175) | 0.090 (0.053-0.140) | 0.071 (0.043-0.110) | 0.058 (0.030-0.099) |
| Hungary                          | 0.054 (0.027-0.096) | 0.038 (0.023-0.058) | 0.028 (0.017-0.043) | 0.022 (0.013-0.034) | 0.016 (0.008-0.028) |
| Iceland                          | 0.051 (0.026-0.089) | 0.030 (0.018-0.048) | 0.024 (0.014-0.037) | 0.018 (0.011-0.029) | 0.013 (0.006-0.024) |
| India                            | 0.211 (0.133-0.298) | 0.202 (0.153-0.257) | 0.192 (0.159-0.228) | 0.178 (0.150-0.207) | 0.159 (0.116-0.210) |
| Indonesia                        | 0.257 (0.166-0.357) | 0.241 (0.180-0.306) | 0.218 (0.170-0.268) | 0.189 (0.146-0.234) | 0.159 (0.107-0.219) |
| Iran                             | 0.133 (0.070-0.221) | 0.105 (0.069-0.150) | 0.087 (0.063-0.115) | 0.067 (0.053-0.085) | 0.050 (0.032-0.073) |
| Iraq                             | 0.098 (0.046-0.176) | 0.079 (0.045-0.126) | 0.070 (0.042-0.107) | 0.060 (0.036-0.092) | 0.047 (0.024-0.079) |
| Ireland                          | 0.062 (0.029-0.113) | 0.042 (0.023-0.068) | 0.030 (0.017-0.047) | 0.020 (0.011-0.031) | 0.016 (0.008-0.028) |
| Israel                           | 0.051 (0.023-0.095) | 0.038 (0.022-0.062) | 0.029 (0.017-0.045) | 0.022 (0.013-0.034) | 0.017 (0.009-0.031) |
| Italy                            | 0.059 (0.032-0.098) | 0.042 (0.029-0.058) | 0.030 (0.022-0.040) | 0.022 (0.016-0.030) | 0.018 (0.010-0.028) |
| Jamaica                          | 0.135 (0.072-0.220) | 0.118 (0.077-0.173) | 0.102 (0.070-0.141) | 0.079 (0.054-0.112) | 0.062 (0.033-0.099) |
| Japan                            | 0.173 (0.131-0.219) | 0.145 (0.122-0.170) | 0.119 (0.100-0.140) | 0.102 (0.084-0.122) | 0.090 (0.063-0.125) |
| Jordan                           | 0.094 (0.042-0.172) | 0.071 (0.042-0.109) | 0.052 (0.032-0.077) | 0.039 (0.025-0.058) | 0.030 (0.016-0.049) |
| Kazakhstan                       | 0.095 (0.041-0.174) | 0.073 (0.036-0.124) | 0.058 (0.029-0.099) | 0.045 (0.023-0.076) | 0.028 (0.012-0.053) |
| Kenya                            | 0.243 (0.139-0.360) | 0.222 (0.146-0.309) | 0.203 (0.138-0.277) | 0.192 (0.131-0.260) | 0.176 (0.105-0.261) |
| Kiribati                         | 0.026 (0.010-0.053) | 0.020 (0.009-0.036) | 0.017 (0.008-0.030) | 0.013 (0.006-0.023) | 0.012 (0.005-0.023) |
| Kuwait                           | 0.065 (0.026-0.129) | 0.041 (0.023-0.064) | 0.032 (0.020-0.047) | 0.021 (0.013-0.031) | 0.016 (0.008-0.027) |
| Kyrgyzstan                       | 0.105 (0.045-0.199) | 0.088 (0.045-0.151) | 0.076 (0.040-0.127) | 0.067 (0.036-0.110) | 0.054 (0.026-0.094) |
| Lao PDR                          | 0.262 (0.160-0.375) | 0.250 (0.172-0.332) | 0.238 (0.171-0.307) | 0.213 (0.154-0.277) | 0.183 (0.118-0.256) |
| Latvia                           | 0.073 (0.033-0.135) | 0.054 (0.029-0.088) | 0.044 (0.025-0.071) | 0.035 (0.020-0.055) | 0.021 (0.010-0.039) |
| Lebanon                          | 0.089 (0.043-0.157) | 0.067 (0.038-0.106) | 0.049 (0.028-0.078) | 0.034 (0.019-0.056) | 0.027 (0.014-0.047) |
| Lesotho                          | 0.235 (0.127-0.362) | 0.224 (0.145-0.317) | 0.208 (0.140-0.286) | 0.191 (0.131-0.261) | 0.173 (0.107-0.252) |
| Liberia                          | 0.211 (0.116-0.328) | 0.193 (0.121-0.280) | 0.190 (0.116-0.278) | 0.185 (0.125-0.252) | 0.169 (0.103-0.245) |
| Libya                            | 0.101 (0.039-0.193) | 0.063 (0.035-0.100) | 0.049 (0.030-0.074) | 0.039 (0.025-0.058) | 0.032 (0.017-0.054) |
| Lithuania                        | 0.079 (0.037-0.139) | 0.054 (0.032-0.085) | 0.043 (0.026-0.064) | 0.032 (0.019-0.048) | 0.019 (0.009-0.034) |
| Luxembourg                       | 0.060 (0.030-0.105) | 0.039 (0.021-0.065) | 0.025 (0.013-0.042) | 0.019 (0.011-0.031) | 0.015 (0.007-0.026) |
| Macedonia (TFYR)                 | 0.082 (0.036-0.152) | 0.059 (0.031-0.100) | 0.046 (0.025-0.075) | 0.034 (0.018-0.056) | 0.024 (0.011-0.044) |
| Madagascar                       | 0.226 (0.127-0.341) | 0.211 (0.139-0.292) | 0.199 (0.137-0.268) | 0.192 (0.137-0.256) | 0.184 (0.115-0.264) |
| Malawi                           | 0.239 (0.128-0.368) | 0.230 (0.146-0.324) | 0.222 (0.153-0.299) | 0.215 (0.152-0.283) | 0.204 (0.131-0.283) |
| Malaysia                         | 0.221 (0.134-0.326) | 0.190 (0.130-0.257) | 0.154 (0.108-0.205) | 0.119 (0.085-0.157) | 0.092 (0.057-0.138) |
| Maldives                         | 0.227 (0.125-0.343) | 0.206 (0.131-0.286) | 0.177 (0.112-0.247) | 0.137 (0.082-0.203) | 0.109 (0.059-0.176) |
| Mali                             | 0.226 (0.122-0.351) | 0.215 (0.137-0.304) | 0.205 (0.138-0.281) | 0.192 (0.132-0.259) | 0.174 (0.107-0.255) |
| Malta                            | 0.051 (0.018-0.109) | 0.035 (0.018-0.060) | 0.027 (0.015-0.044) | 0.018 (0.010-0.030) | 0.014 (0.006-0.026) |
| Marshall Islands                 | 0.020 (0.007-0.044) | 0.016 (0.007-0.030) | 0.012 (0.006-0.023) | 0.011 (0.005-0.019) | 0.009 (0.004-0.019) |
| Mauritania                       | 0.224 (0.123-0.344) | 0.202 (0.127-0.287) | 0.182 (0.119-0.255) | 0.166 (0.110-0.232) | 0.147 (0.086-0.222) |
| Mauritius                        | 0.188 (0.104-0.291) | 0.167 (0.109-0.234) | 0.143 (0.096-0.197) | 0.118 (0.078-0.168) | 0.097 (0.052-0.159) |
| Mexico                           | 0.095 (0.048-0.165) | 0.069 (0.042-0.105) | 0.049 (0.033-0.070) | 0.036 (0.024-0.048) | 0.027 (0.015-0.042) |
| Micronesia (Federated States of) | 0.034 (0.012-0.071) | 0.027 (0.013-0.050) | 0.022 (0.012-0.039) | 0.019 (0.010-0.031) | 0.016 (0.007-0.029) |
| Moldova                          | 0.104 (0.047-0.191) | 0.081 (0.043-0.132) | 0.069 (0.038-0.111) | 0.063 (0.035-0.100) | 0.044 (0.022-0.077) |
| Mongolia                         | 0.097 (0.041-0.187) | 0.080 (0.041-0.136) | 0.069 (0.038-0.111) | 0.058 (0.034-0.089) | 0.043 (0.023-0.072) |
| Montenegro                       | 0.095 (0.038-0.186) | 0.064 (0.032-0.112) | 0.045 (0.025-0.074) | 0.030 (0.016-0.048) | 0.020 (0.010-0.037) |
| Morocco                          | 0.125 (0.059-0.221) | 0.105 (0.062-0.162) | 0.087 (0.054-0.130) | 0.070 (0.044-0.105) | 0.056 (0.029-0.094) |
| Mozambique                       | 0.232 (0.116-0.372) | 0.221 (0.133-0.325) | 0.214 (0.140-0.296) | 0.206 (0.143-0.275) | 0.198 (0.126-0.280) |
| Myanmar                          | 0.238 (0.115-0.386) | 0.235 (0.149-0.330) | 0.229 (0.162-0.303) | 0.213 (0.157-0.275) | 0.180 (0.119-0.248) |
| Namibia                          | 0.225 (0.118-0.346) | 0.206 (0.128-0.294) | 0.188 (0.122-0.262) | 0.161 (0.107-0.224) | 0.136 (0.080-0.207) |
| Nauru                            | 0.009 (0.003-0.018) | 0.006 (0.003-0.012) | 0.005 (0.002-0.010) | 0.005 (0.002-0.010) | 0.005 (0.002-0.012) |
| Nepal                            | 0.223 (0.123-0.341) | 0.212 (0.136-0.297) | 0.197 (0.136-0.265) | 0.180 (0.124-0.243) | 0.163 (0.101-0.237) |
| Netherlands                      | 0.077 (0.042-0.126) | 0.055 (0.036-0.080) | 0.039 (0.026-0.055) | 0.026 (0.018-0.036) | 0.020 (0.012-0.033) |
| New Zealand                      | 0.051 (0.027-0.088) | 0.036 (0.022-0.054) | 0.027 (0.017-0.039) | 0.021 (0.014-0.030) | 0.016 (0.010-0.026) |
| Nicaragua                        | 0.107 (0.049-0.188) | 0.088 (0.046-0.142) | 0.080 (0.045-0.125) | 0.067 (0.040-0.103) | 0.057 (0.029-0.099) |
| Niger                            | 0.239 (0.134-0.359) | 0.232 (0.151-0.322) | 0.221 (0.151-0.296) | 0.212 (0.150-0.280) | 0.207 (0.132-0.289) |
| Nigeria                          | 0.225 (0.135-0.332) | 0.204 (0.145-0.273) | 0.189 (0.143-0.242) | 0.168 (0.127-0.211) | 0.139 (0.093-0.194) |
| Niue                             | 0.028 (0.010-0.061) | 0.019 (0.008-0.037) | 0.014 (0.006-0.025) | 0.010 (0.004-0.017) | 0.006 (0.002-0.013) |
| North Korea                      | 0.179 (0.088-0.290) | 0.164 (0.098-0.245) | 0.156 (0.097-0.232) | 0.163 (0.094-0.247) | 0.159 (0.076-0.267) |
| Norway                           | 0.080 (0.044-0.131) | 0.050 (0.032-0.074) | 0.035 (0.023-0.051) | 0.023 (0.015-0.034) | 0.017 (0.009-0.030) |
| Occupied Palestinian Territory   | 0.086 (0.039-0.158) | 0.071 (0.038-0.115) | 0.060 (0.035-0.092) | 0.049 (0.029-0.073) | 0.043 (0.021-0.076) |
| Oman                             | 0.130 (0.059-0.228) | 0.092 (0.056-0.141) | 0.065 (0.042-0.095) | 0.048 (0.031-0.071) | 0.035 (0.019-0.059) |
| Pakistan                         | 0.204 (0.118-0.305) | 0.189 (0.127-0.258) | 0.173 (0.123-0.231) | 0.158 (0.110-0.213) | 0.141 (0.086-0.211) |
| Palau                            | 0.021 (0.007-0.048) | 0.015 (0.007-0.027) | 0.011 (0.005-0.020) | 0.008 (0.004-0.015) | 0.007 (0.003-0.014) |

|                                  |                     |                     |                     |                     |                     |
|----------------------------------|---------------------|---------------------|---------------------|---------------------|---------------------|
| Panama                           | 0.098 (0.047-0.177) | 0.075 (0.042-0.124) | 0.060 (0.035-0.095) | 0.046 (0.028-0.071) | 0.034 (0.018-0.058) |
| Papua New Guinea                 | 0.088 (0.031-0.183) | 0.075 (0.032-0.140) | 0.065 (0.030-0.116) | 0.058 (0.029-0.101) | 0.050 (0.022-0.094) |
| Paraguay                         | 0.116 (0.052-0.211) | 0.098 (0.051-0.163) | 0.074 (0.041-0.121) | 0.055 (0.030-0.090) | 0.044 (0.021-0.079) |
| Peru                             | 0.092 (0.040-0.169) | 0.072 (0.038-0.121) | 0.059 (0.033-0.095) | 0.046 (0.028-0.071) | 0.034 (0.018-0.057) |
| Philippines                      | 0.222 (0.131-0.324) | 0.204 (0.141-0.273) | 0.186 (0.131-0.243) | 0.169 (0.121-0.222) | 0.149 (0.094-0.215) |
| Poland                           | 0.065 (0.033-0.115) | 0.048 (0.031-0.072) | 0.039 (0.026-0.055) | 0.028 (0.019-0.040) | 0.019 (0.011-0.031) |
| Portugal                         | 0.083 (0.039-0.146) | 0.064 (0.039-0.098) | 0.042 (0.028-0.062) | 0.026 (0.017-0.039) | 0.019 (0.010-0.033) |
| Puerto Rico                      | 0.113 (0.057-0.190) | 0.083 (0.047-0.132) | 0.059 (0.033-0.094) | 0.042 (0.024-0.067) | 0.032 (0.016-0.056) |
| Qatar                            | 0.079 (0.035-0.145) | 0.055 (0.028-0.096) | 0.040 (0.023-0.064) | 0.027 (0.015-0.042) | 0.019 (0.009-0.033) |
| Romania                          | 0.084 (0.038-0.154) | 0.055 (0.031-0.090) | 0.042 (0.025-0.067) | 0.032 (0.019-0.051) | 0.021 (0.010-0.038) |
| Russian Federation               | 0.085 (0.044-0.140) | 0.063 (0.044-0.086) | 0.051 (0.039-0.066) | 0.041 (0.029-0.054) | 0.027 (0.014-0.044) |
| Rwanda                           | 0.275 (0.144-0.418) | 0.262 (0.157-0.375) | 0.245 (0.161-0.338) | 0.229 (0.156-0.309) | 0.214 (0.135-0.302) |
| Saint Kitts and Nevis            | 0.130 (0.064-0.218) | 0.104 (0.057-0.163) | 0.086 (0.050-0.133) | 0.064 (0.036-0.099) | 0.049 (0.023-0.088) |
| Saint Lucia                      | 0.147 (0.076-0.242) | 0.127 (0.078-0.189) | 0.103 (0.065-0.150) | 0.076 (0.046-0.115) | 0.058 (0.027-0.102) |
| Saint Vincent and the Grenadines | 0.140 (0.068-0.239) | 0.122 (0.070-0.189) | 0.100 (0.058-0.153) | 0.077 (0.046-0.119) | 0.057 (0.028-0.097) |
| Samoa                            | 0.022 (0.008-0.048) | 0.016 (0.008-0.030) | 0.012 (0.006-0.021) | 0.009 (0.004-0.015) | 0.006 (0.002-0.013) |
| Sao Tome and Principe            | 0.203 (0.110-0.314) | 0.187 (0.118-0.270) | 0.164 (0.104-0.233) | 0.147 (0.098-0.204) | 0.128 (0.076-0.192) |
| Saudi Arabia                     | 0.103 (0.045-0.190) | 0.064 (0.040-0.097) | 0.045 (0.031-0.061) | 0.034 (0.023-0.048) | 0.025 (0.014-0.041) |
| Senegal                          | 0.204 (0.112-0.318) | 0.193 (0.124-0.276) | 0.181 (0.122-0.254) | 0.168 (0.115-0.232) | 0.156 (0.096-0.228) |
| Serbia                           | 0.090 (0.044-0.161) | 0.065 (0.039-0.099) | 0.049 (0.031-0.072) | 0.035 (0.022-0.051) | 0.026 (0.014-0.042) |
| Seychelles                       | 0.179 (0.095-0.277) | 0.148 (0.090-0.214) | 0.123 (0.077-0.179) | 0.097 (0.060-0.144) | 0.078 (0.041-0.131) |
| Sierra Leone                     | 0.215 (0.117-0.334) | 0.203 (0.131-0.290) | 0.197 (0.135-0.270) | 0.189 (0.136-0.252) | 0.170 (0.110-0.240) |
| Singapore                        | 0.166 (0.090-0.260) | 0.132 (0.089-0.182) | 0.102 (0.072-0.138) | 0.082 (0.058-0.112) | 0.062 (0.038-0.095) |
| Slovakia                         | 0.063 (0.029-0.116) | 0.044 (0.025-0.070) | 0.032 (0.019-0.049) | 0.024 (0.014-0.036) | 0.017 (0.008-0.028) |
| Slovenia                         | 0.082 (0.035-0.154) | 0.055 (0.029-0.092) | 0.040 (0.022-0.066) | 0.027 (0.015-0.044) | 0.019 (0.009-0.035) |
| Solomon Islands                  | 0.091 (0.031-0.186) | 0.077 (0.032-0.144) | 0.067 (0.032-0.121) | 0.063 (0.032-0.107) | 0.056 (0.026-0.104) |
| Somalia                          | 0.213 (0.106-0.340) | 0.203 (0.118-0.305) | 0.198 (0.122-0.282) | 0.192 (0.120-0.272) | 0.187 (0.106-0.283) |
| South Africa                     | 0.180 (0.100-0.274) | 0.158 (0.106-0.219) | 0.138 (0.099-0.183) | 0.119 (0.089-0.153) | 0.096 (0.064-0.135) |
| South Korea                      | 0.229 (0.146-0.324) | 0.169 (0.124-0.220) | 0.119 (0.088-0.156) | 0.092 (0.070-0.119) | 0.061 (0.039-0.090) |
| Spain                            | 0.062 (0.031-0.105) | 0.041 (0.027-0.058) | 0.028 (0.020-0.038) | 0.019 (0.013-0.026) | 0.015 (0.008-0.024) |
| Sri Lanka                        | 0.232 (0.138-0.344) | 0.223 (0.153-0.300) | 0.206 (0.147-0.269) | 0.183 (0.129-0.240) | 0.155 (0.091-0.233) |
| Sudan                            | 0.220 (0.121-0.338) | 0.203 (0.128-0.288) | 0.188 (0.122-0.259) | 0.171 (0.113-0.236) | 0.154 (0.091-0.232) |
| Suriname                         | 0.128 (0.062-0.216) | 0.101 (0.056-0.159) | 0.089 (0.052-0.141) | 0.069 (0.040-0.111) | 0.053 (0.027-0.094) |
| Swaziland                        | 0.232 (0.125-0.351) | 0.207 (0.128-0.299) | 0.185 (0.118-0.263) | 0.162 (0.104-0.232) | 0.142 (0.078-0.224) |
| Sweden                           | 0.067 (0.039-0.106) | 0.048 (0.034-0.065) | 0.036 (0.026-0.047) | 0.026 (0.018-0.035) | 0.019 (0.011-0.030) |
| Switzerland                      | 0.076 (0.036-0.134) | 0.050 (0.029-0.077) | 0.033 (0.020-0.047) | 0.025 (0.016-0.037) | 0.020 (0.011-0.033) |
| Syrian Arab Republic             | 0.113 (0.052-0.198) | 0.085 (0.048-0.134) | 0.072 (0.043-0.109) | 0.057 (0.034-0.086) | 0.047 (0.024-0.080) |
| Taiwan                           | 0.189 (0.108-0.280) | 0.149 (0.101-0.205) | 0.109 (0.075-0.149) | 0.081 (0.055-0.114) | 0.066 (0.035-0.107) |
| Tajikistan                       | 0.109 (0.046-0.201) | 0.093 (0.046-0.157) | 0.084 (0.043-0.140) | 0.082 (0.043-0.137) | 0.066 (0.030-0.119) |
| Tanzania                         | 0.228 (0.121-0.350) | 0.216 (0.139-0.305) | 0.207 (0.144-0.277) | 0.199 (0.143-0.258) | 0.182 (0.118-0.253) |
| Thailand                         | 0.238 (0.147-0.345) | 0.219 (0.158-0.286) | 0.195 (0.147-0.248) | 0.161 (0.121-0.206) | 0.130 (0.080-0.190) |
| Timor-Leste                      | 0.253 (0.152-0.369) | 0.245 (0.168-0.330) | 0.232 (0.165-0.306) | 0.221 (0.158-0.291) | 0.205 (0.132-0.285) |
| Togo                             | 0.222 (0.125-0.344) | 0.209 (0.133-0.296) | 0.196 (0.132-0.269) | 0.184 (0.130-0.244) | 0.172 (0.108-0.246) |
| Tokelau                          | 0.036 (0.009-0.093) | 0.025 (0.009-0.056) | 0.019 (0.008-0.036) | 0.014 (0.006-0.026) | 0.010 (0.004-0.022) |
| Tonga                            | 0.023 (0.008-0.051) | 0.017 (0.008-0.032) | 0.013 (0.006-0.024) | 0.010 (0.005-0.018) | 0.008 (0.003-0.016) |
| Trinidad and Tobago              | 0.154 (0.061-0.277) | 0.125 (0.060-0.208) | 0.104 (0.059-0.162) | 0.076 (0.040-0.123) | 0.052 (0.019-0.106) |
| Tunisia                          | 0.119 (0.058-0.210) | 0.096 (0.059-0.147) | 0.078 (0.051-0.114) | 0.061 (0.040-0.089) | 0.048 (0.027-0.079) |
| Turkey                           | 0.099 (0.049-0.172) | 0.075 (0.048-0.109) | 0.054 (0.038-0.075) | 0.039 (0.028-0.051) | 0.028 (0.017-0.042) |
| Turkmenistan                     | 0.097 (0.040-0.184) | 0.081 (0.040-0.139) | 0.066 (0.034-0.112) | 0.056 (0.030-0.093) | 0.038 (0.018-0.067) |
| Tuvalu                           | 0.026 (0.009-0.054) | 0.020 (0.009-0.037) | 0.015 (0.007-0.027) | 0.012 (0.006-0.021) | 0.010 (0.004-0.019) |
| Uganda                           | 0.244 (0.128-0.373) | 0.238 (0.147-0.338) | 0.231 (0.151-0.316) | 0.218 (0.151-0.294) | 0.198 (0.128-0.277) |
| Ukraine                          | 0.085 (0.038-0.153) | 0.063 (0.033-0.102) | 0.051 (0.028-0.084) | 0.044 (0.024-0.072) | 0.031 (0.014-0.056) |
| United Arab Emirates             | 0.071 (0.023-0.153) | 0.046 (0.022-0.080) | 0.034 (0.019-0.052) | 0.025 (0.015-0.039) | 0.023 (0.011-0.041) |
| United Kingdom                   | 0.058 (0.033-0.093) | 0.044 (0.032-0.059) | 0.034 (0.026-0.043) | 0.025 (0.020-0.032) | 0.019 (0.013-0.028) |
| United States of America         | 0.051 (0.030-0.080) | 0.036 (0.024-0.050) | 0.025 (0.018-0.035) | 0.018 (0.013-0.025) | 0.014 (0.008-0.022) |
| Uruguay                          | 0.070 (0.028-0.139) | 0.057 (0.029-0.099) | 0.047 (0.026-0.075) | 0.036 (0.021-0.056) | 0.029 (0.014-0.050) |
| Uzbekistan                       | 0.102 (0.042-0.197) | 0.085 (0.041-0.149) | 0.073 (0.038-0.122) | 0.065 (0.034-0.107) | 0.050 (0.023-0.091) |
| Vanuatu                          | 0.074 (0.025-0.157) | 0.061 (0.026-0.117) | 0.053 (0.025-0.095) | 0.046 (0.023-0.080) | 0.040 (0.018-0.074) |
| Venezuela                        | 0.074 (0.033-0.138) | 0.054 (0.029-0.088) | 0.042 (0.024-0.064) | 0.032 (0.019-0.048) | 0.024 (0.012-0.040) |
| Viet Nam                         | 0.253 (0.159-0.353) | 0.251 (0.189-0.314) | 0.240 (0.194-0.290) | 0.215 (0.173-0.259) | 0.178 (0.123-0.239) |
| Yemen                            | 0.153 (0.070-0.267) | 0.131 (0.075-0.205) | 0.111 (0.068-0.167) | 0.095 (0.058-0.143) | 0.082 (0.043-0.137) |
| Zambia                           | 0.209 (0.118-0.314) | 0.191 (0.121-0.271) | 0.185 (0.124-0.257) | 0.179 (0.124-0.243) | 0.163 (0.099-0.240) |
| Zimbabwe                         | 0.226 (0.128-0.339) | 0.207 (0.135-0.286) | 0.191 (0.130-0.256) | 0.177 (0.122-0.236) | 0.171 (0.107-0.248) |

**Women, 18.5 ≤ BMI < 20 kg/m<sup>2</sup>**

| Country                  | Year                |                     |                     |                     |                     |
|--------------------------|---------------------|---------------------|---------------------|---------------------|---------------------|
|                          | 1975                | 1985                | 1995                | 2005                | 2014                |
| Afghanistan              | 0.228 (0.132-0.340) | 0.208 (0.139-0.288) | 0.192 (0.136-0.257) | 0.179 (0.127-0.236) | 0.161 (0.103-0.230) |
| Albania                  | 0.119 (0.054-0.207) | 0.104 (0.061-0.157) | 0.095 (0.062-0.136) | 0.083 (0.054-0.117) | 0.074 (0.042-0.118) |
| Algeria                  | 0.122 (0.057-0.221) | 0.094 (0.057-0.147) | 0.073 (0.049-0.102) | 0.056 (0.038-0.078) | 0.044 (0.025-0.069) |
| American Samoa           | 0.021 (0.008-0.042) | 0.016 (0.007-0.029) | 0.013 (0.006-0.023) | 0.012 (0.005-0.020) | 0.011 (0.004-0.022) |
| Andorra                  | 0.064 (0.031-0.113) | 0.053 (0.030-0.082) | 0.049 (0.030-0.074) | 0.045 (0.028-0.067) | 0.044 (0.023-0.073) |
| Angola                   | 0.233 (0.121-0.363) | 0.204 (0.124-0.297) | 0.176 (0.116-0.247) | 0.151 (0.098-0.215) | 0.124 (0.068-0.197) |
| Antigua and Barbuda      | 0.112 (0.051-0.201) | 0.088 (0.050-0.140) | 0.066 (0.039-0.099) | 0.051 (0.030-0.081) | 0.037 (0.016-0.070) |
| Argentina                | 0.068 (0.030-0.125) | 0.059 (0.034-0.093) | 0.053 (0.033-0.076) | 0.048 (0.032-0.067) | 0.044 (0.025-0.069) |
| Armenia                  | 0.098 (0.037-0.197) | 0.083 (0.042-0.143) | 0.077 (0.046-0.117) | 0.067 (0.043-0.097) | 0.054 (0.028-0.088) |
| Australia                | 0.093 (0.058-0.138) | 0.079 (0.058-0.103) | 0.069 (0.052-0.088) | 0.059 (0.045-0.076) | 0.052 (0.034-0.074) |
| Austria                  | 0.104 (0.060-0.161) | 0.092 (0.064-0.128) | 0.083 (0.058-0.112) | 0.073 (0.050-0.099) | 0.065 (0.038-0.099) |
| Azerbaijan               | 0.108 (0.043-0.203) | 0.088 (0.046-0.148) | 0.078 (0.047-0.118) | 0.067 (0.042-0.100) | 0.050 (0.026-0.086) |
| Bahamas                  | 0.077 (0.035-0.139) | 0.062 (0.035-0.097) | 0.050 (0.030-0.076) | 0.042 (0.025-0.063) | 0.037 (0.019-0.063) |
| Bahrain                  | 0.064 (0.027-0.123) | 0.054 (0.031-0.088) | 0.046 (0.029-0.068) | 0.037 (0.024-0.055) | 0.032 (0.017-0.052) |
| Bangladesh               | 0.212 (0.127-0.311) | 0.194 (0.136-0.258) | 0.179 (0.136-0.226) | 0.162 (0.125-0.203) | 0.145 (0.099-0.200) |
| Barbados                 | 0.120 (0.059-0.213) | 0.094 (0.055-0.144) | 0.076 (0.049-0.110) | 0.056 (0.035-0.082) | 0.041 (0.020-0.072) |
| Belarus                  | 0.084 (0.036-0.152) | 0.069 (0.039-0.109) | 0.063 (0.040-0.094) | 0.060 (0.038-0.088) | 0.053 (0.028-0.088) |
| Belgium                  | 0.078 (0.043-0.128) | 0.073 (0.051-0.101) | 0.067 (0.049-0.089) | 0.063 (0.045-0.085) | 0.063 (0.039-0.095) |
| Belize                   | 0.117 (0.054-0.209) | 0.100 (0.059-0.155) | 0.083 (0.053-0.119) | 0.064 (0.041-0.092) | 0.052 (0.028-0.086) |
| Benin                    | 0.215 (0.123-0.325) | 0.185 (0.126-0.256) | 0.162 (0.119-0.211) | 0.139 (0.106-0.178) | 0.119 (0.079-0.164) |
| Bermuda                  | 0.048 (0.018-0.099) | 0.043 (0.021-0.075) | 0.037 (0.020-0.061) | 0.036 (0.020-0.056) | 0.032 (0.015-0.056) |
| Bhutan                   | 0.246 (0.145-0.360) | 0.223 (0.149-0.304) | 0.197 (0.139-0.258) | 0.170 (0.122-0.220) | 0.146 (0.096-0.205) |
| Bolivia                  | 0.088 (0.033-0.170) | 0.067 (0.034-0.113) | 0.052 (0.030-0.081) | 0.043 (0.026-0.064) | 0.038 (0.020-0.064) |
| Bosnia and Herzegovina   | 0.127 (0.050-0.240) | 0.110 (0.059-0.180) | 0.101 (0.064-0.150) | 0.083 (0.054-0.119) | 0.078 (0.046-0.118) |
| Botswana                 | 0.193 (0.091-0.317) | 0.153 (0.089-0.230) | 0.108 (0.069-0.156) | 0.087 (0.057-0.123) | 0.071 (0.040-0.111) |
| Brazil                   | 0.113 (0.057-0.191) | 0.090 (0.058-0.129) | 0.076 (0.056-0.101) | 0.068 (0.051-0.088) | 0.062 (0.040-0.091) |
| Brunei Darussalam        | 0.173 (0.071-0.310) | 0.146 (0.076-0.235) | 0.120 (0.073-0.174) | 0.098 (0.061-0.142) | 0.089 (0.047-0.144) |
| Bulgaria                 | 0.082 (0.039-0.145) | 0.069 (0.041-0.103) | 0.066 (0.043-0.094) | 0.067 (0.044-0.095) | 0.067 (0.037-0.105) |
| Burkina Faso             | 0.236 (0.135-0.350) | 0.211 (0.146-0.284) | 0.186 (0.140-0.239) | 0.158 (0.121-0.204) | 0.139 (0.095-0.195) |
| Burundi                  | 0.265 (0.147-0.397) | 0.241 (0.149-0.341) | 0.211 (0.140-0.287) | 0.182 (0.125-0.246) | 0.156 (0.098-0.224) |
| Cabo Verde               | 0.219 (0.120-0.335) | 0.187 (0.125-0.261) | 0.155 (0.108-0.205) | 0.123 (0.087-0.163) | 0.105 (0.065-0.156) |
| Cambodia                 | 0.264 (0.158-0.386) | 0.243 (0.172-0.324) | 0.216 (0.163-0.273) | 0.186 (0.143-0.233) | 0.155 (0.105-0.212) |
| Cameroon                 | 0.194 (0.106-0.300) | 0.161 (0.107-0.226) | 0.137 (0.099-0.179) | 0.117 (0.085-0.148) | 0.098 (0.062-0.139) |
| Canada                   | 0.087 (0.051-0.136) | 0.070 (0.048-0.096) | 0.057 (0.040-0.077) | 0.047 (0.033-0.063) | 0.041 (0.025-0.063) |
| Central African Republic | 0.212 (0.110-0.338) | 0.191 (0.116-0.281) | 0.177 (0.117-0.245) | 0.160 (0.107-0.220) | 0.142 (0.080-0.217) |
| Chad                     | 0.220 (0.128-0.332) | 0.195 (0.133-0.268) | 0.172 (0.126-0.224) | 0.144 (0.108-0.189) | 0.124 (0.080-0.179) |
| Chile                    | 0.068 (0.029-0.132) | 0.055 (0.030-0.091) | 0.048 (0.030-0.071) | 0.042 (0.027-0.060) | 0.037 (0.020-0.060) |
| China                    | 0.197 (0.119-0.288) | 0.182 (0.143-0.224) | 0.161 (0.137-0.188) | 0.130 (0.105-0.157) | 0.104 (0.070-0.147) |
| China (Hong Kong SAR)    | 0.090 (0.034-0.178) | 0.088 (0.046-0.144) | 0.089 (0.055-0.134) | 0.095 (0.059-0.142) | 0.097 (0.050-0.167) |
| Colombia                 | 0.092 (0.042-0.168) | 0.073 (0.043-0.114) | 0.061 (0.041-0.086) | 0.053 (0.037-0.071) | 0.047 (0.029-0.071) |
| Comoros                  | 0.201 (0.111-0.311) | 0.182 (0.121-0.255) | 0.161 (0.114-0.216) | 0.142 (0.104-0.187) | 0.122 (0.079-0.175) |
| Congo                    | 0.194 (0.105-0.298) | 0.166 (0.108-0.232) | 0.143 (0.101-0.194) | 0.128 (0.090-0.172) | 0.113 (0.066-0.171) |
| Cook Islands             | 0.034 (0.014-0.067) | 0.025 (0.012-0.042) | 0.018 (0.009-0.030) | 0.013 (0.007-0.023) | 0.011 (0.005-0.022) |
| Costa Rica               | 0.106 (0.046-0.194) | 0.082 (0.046-0.132) | 0.062 (0.039-0.092) | 0.048 (0.031-0.069) | 0.041 (0.023-0.066) |
| Cote d'Ivoire            | 0.189 (0.104-0.294) | 0.165 (0.110-0.230) | 0.145 (0.106-0.189) | 0.124 (0.092-0.161) | 0.108 (0.069-0.153) |
| Croatia                  | 0.107 (0.052-0.184) | 0.088 (0.053-0.131) | 0.079 (0.052-0.112) | 0.070 (0.046-0.100) | 0.063 (0.036-0.100) |
| Cuba                     | 0.096 (0.045-0.171) | 0.076 (0.045-0.118) | 0.066 (0.043-0.095) | 0.059 (0.039-0.084) | 0.050 (0.028-0.081) |
| Cyprus                   | 0.110 (0.054-0.186) | 0.080 (0.048-0.121) | 0.064 (0.041-0.092) | 0.054 (0.034-0.078) | 0.048 (0.026-0.079) |
| Czech Republic           | 0.059 (0.028-0.103) | 0.052 (0.031-0.076) | 0.053 (0.035-0.075) | 0.054 (0.036-0.077) | 0.056 (0.032-0.088) |
| Denmark                  | 0.088 (0.049-0.139) | 0.077 (0.052-0.109) | 0.071 (0.050-0.098) | 0.067 (0.046-0.094) | 0.064 (0.038-0.098) |
| Djibouti                 | 0.150 (0.068-0.259) | 0.138 (0.074-0.226) | 0.132 (0.083-0.193) | 0.129 (0.083-0.185) | 0.121 (0.066-0.192) |
| Dominica                 | 0.116 (0.056-0.201) | 0.090 (0.054-0.138) | 0.070 (0.045-0.101) | 0.056 (0.035-0.082) | 0.046 (0.025-0.075) |
| Dominican Republic       | 0.134 (0.067-0.227) | 0.105 (0.066-0.156) | 0.087 (0.059-0.120) | 0.066 (0.045-0.093) | 0.055 (0.031-0.087) |
| DR Congo                 | 0.212 (0.114-0.329) | 0.189 (0.120-0.270) | 0.168 (0.113-0.232) | 0.152 (0.104-0.209) | 0.135 (0.079-0.204) |
| Ecuador                  | 0.090 (0.035-0.178) | 0.065 (0.033-0.111) | 0.050 (0.028-0.079) | 0.042 (0.025-0.063) | 0.036 (0.019-0.060) |
| Egypt                    | 0.100 (0.044-0.190) | 0.074 (0.044-0.114) | 0.055 (0.036-0.076) | 0.038 (0.026-0.052) | 0.026 (0.014-0.041) |
| El Salvador              | 0.107 (0.048-0.192) | 0.085 (0.048-0.133) | 0.067 (0.042-0.097) | 0.053 (0.035-0.076) | 0.045 (0.026-0.072) |
| Equatorial Guinea        | 0.212 (0.110-0.339) | 0.190 (0.118-0.278) | 0.164 (0.108-0.234) | 0.123 (0.075-0.183) | 0.098 (0.048-0.171) |
| Eritrea                  | 0.215 (0.123-0.325) | 0.196 (0.133-0.268) | 0.175 (0.129-0.229) | 0.153 (0.115-0.197) | 0.133 (0.087-0.190) |
| Estonia                  | 0.070 (0.032-0.124) | 0.064 (0.039-0.095) | 0.065 (0.045-0.088) | 0.062 (0.045-0.082) | 0.060 (0.038-0.088) |
| Ethiopia                 | 0.221 (0.125-0.338) | 0.202 (0.137-0.280) | 0.183 (0.134-0.241) | 0.167 (0.126-0.214) | 0.148 (0.099-0.210) |
| Fiji                     | 0.081 (0.027-0.169) | 0.062 (0.027-0.115) | 0.048 (0.024-0.083) | 0.038 (0.020-0.061) | 0.032 (0.015-0.056) |
| Finland                  | 0.109 (0.065-0.167) | 0.088 (0.063-0.117) | 0.075 (0.057-0.096) | 0.069 (0.052-0.089) | 0.067 (0.045-0.097) |
| France                   | 0.085 (0.045-0.142) | 0.076 (0.049-0.112) | 0.069 (0.047-0.097) | 0.060 (0.041-0.085) | 0.056 (0.033-0.087) |
| French Polynesia         | 0.032 (0.012-0.066) | 0.025 (0.011-0.046) | 0.019 (0.009-0.034) | 0.016 (0.008-0.027) | 0.013 (0.006-0.026) |

|                                  |                     |                     |                     |                     |                     |
|----------------------------------|---------------------|---------------------|---------------------|---------------------|---------------------|
| Gabon                            | 0.195 (0.089-0.323) | 0.147 (0.083-0.228) | 0.121 (0.075-0.176) | 0.103 (0.065-0.149) | 0.096 (0.053-0.151) |
| Gambia                           | 0.206 (0.115-0.313) | 0.180 (0.121-0.249) | 0.152 (0.109-0.202) | 0.127 (0.092-0.168) | 0.113 (0.070-0.166) |
| Georgia                          | 0.105 (0.041-0.204) | 0.084 (0.043-0.142) | 0.076 (0.045-0.119) | 0.066 (0.041-0.098) | 0.055 (0.030-0.091) |
| Germany                          | 0.093 (0.057-0.140) | 0.084 (0.063-0.109) | 0.076 (0.059-0.097) | 0.068 (0.051-0.090) | 0.063 (0.040-0.092) |
| Ghana                            | 0.187 (0.104-0.288) | 0.164 (0.111-0.227) | 0.140 (0.103-0.182) | 0.114 (0.083-0.150) | 0.094 (0.058-0.137) |
| Greece                           | 0.085 (0.042-0.142) | 0.068 (0.042-0.101) | 0.059 (0.039-0.084) | 0.052 (0.033-0.074) | 0.049 (0.027-0.079) |
| Greenland                        | 0.092 (0.050-0.150) | 0.077 (0.049-0.112) | 0.068 (0.046-0.095) | 0.061 (0.042-0.085) | 0.057 (0.034-0.089) |
| Grenada                          | 0.129 (0.061-0.224) | 0.104 (0.062-0.160) | 0.080 (0.050-0.116) | 0.059 (0.038-0.087) | 0.043 (0.022-0.073) |
| Guatemala                        | 0.118 (0.052-0.213) | 0.094 (0.054-0.149) | 0.075 (0.049-0.108) | 0.058 (0.039-0.082) | 0.048 (0.027-0.076) |
| Guinea                           | 0.213 (0.115-0.331) | 0.185 (0.122-0.257) | 0.164 (0.119-0.216) | 0.141 (0.106-0.183) | 0.124 (0.082-0.173) |
| Guinea Bissau                    | 0.218 (0.125-0.327) | 0.191 (0.129-0.264) | 0.160 (0.113-0.214) | 0.142 (0.104-0.185) | 0.128 (0.082-0.183) |
| Guyana                           | 0.129 (0.062-0.225) | 0.104 (0.062-0.159) | 0.084 (0.054-0.122) | 0.061 (0.037-0.090) | 0.048 (0.024-0.081) |
| Haiti                            | 0.173 (0.089-0.284) | 0.147 (0.093-0.215) | 0.121 (0.082-0.168) | 0.099 (0.067-0.138) | 0.084 (0.047-0.134) |
| Honduras                         | 0.127 (0.059-0.225) | 0.099 (0.057-0.155) | 0.078 (0.052-0.112) | 0.062 (0.043-0.087) | 0.051 (0.030-0.080) |
| Hungary                          | 0.075 (0.038-0.128) | 0.067 (0.043-0.100) | 0.066 (0.044-0.094) | 0.066 (0.044-0.094) | 0.065 (0.037-0.102) |
| Iceland                          | 0.081 (0.043-0.131) | 0.065 (0.041-0.096) | 0.063 (0.043-0.089) | 0.061 (0.041-0.087) | 0.058 (0.034-0.091) |
| India                            | 0.204 (0.130-0.288) | 0.186 (0.139-0.238) | 0.171 (0.140-0.203) | 0.156 (0.131-0.183) | 0.143 (0.105-0.187) |
| Indonesia                        | 0.250 (0.159-0.349) | 0.221 (0.162-0.285) | 0.188 (0.146-0.233) | 0.156 (0.122-0.192) | 0.131 (0.088-0.182) |
| Iran                             | 0.120 (0.058-0.208) | 0.092 (0.059-0.136) | 0.073 (0.054-0.095) | 0.055 (0.043-0.069) | 0.040 (0.026-0.059) |
| Iraq                             | 0.092 (0.041-0.171) | 0.072 (0.041-0.113) | 0.063 (0.040-0.091) | 0.053 (0.035-0.076) | 0.042 (0.024-0.068) |
| Ireland                          | 0.128 (0.070-0.204) | 0.099 (0.063-0.142) | 0.077 (0.050-0.106) | 0.058 (0.037-0.081) | 0.048 (0.027-0.075) |
| Israel                           | 0.062 (0.029-0.112) | 0.055 (0.033-0.085) | 0.050 (0.032-0.073) | 0.047 (0.030-0.069) | 0.046 (0.024-0.075) |
| Italy                            | 0.089 (0.050-0.139) | 0.078 (0.056-0.106) | 0.069 (0.053-0.090) | 0.060 (0.044-0.080) | 0.053 (0.033-0.081) |
| Jamaica                          | 0.107 (0.052-0.184) | 0.087 (0.055-0.130) | 0.070 (0.048-0.097) | 0.054 (0.036-0.075) | 0.042 (0.023-0.069) |
| Japan                            | 0.173 (0.131-0.219) | 0.164 (0.139-0.191) | 0.160 (0.138-0.184) | 0.162 (0.137-0.189) | 0.170 (0.126-0.218) |
| Jordan                           | 0.089 (0.038-0.173) | 0.064 (0.038-0.098) | 0.047 (0.030-0.066) | 0.036 (0.024-0.049) | 0.028 (0.016-0.045) |
| Kazakhstan                       | 0.112 (0.045-0.208) | 0.091 (0.049-0.153) | 0.077 (0.047-0.116) | 0.065 (0.040-0.095) | 0.050 (0.025-0.084) |
| Kenya                            | 0.225 (0.128-0.339) | 0.194 (0.133-0.264) | 0.166 (0.122-0.215) | 0.142 (0.104-0.183) | 0.118 (0.075-0.171) |
| Kiribati                         | 0.045 (0.019-0.090) | 0.032 (0.016-0.055) | 0.024 (0.012-0.041) | 0.017 (0.008-0.029) | 0.014 (0.006-0.028) |
| Kuwait                           | 0.048 (0.017-0.103) | 0.038 (0.020-0.062) | 0.033 (0.020-0.049) | 0.027 (0.017-0.039) | 0.022 (0.012-0.037) |
| Kyrgyzstan                       | 0.129 (0.054-0.238) | 0.108 (0.059-0.177) | 0.092 (0.057-0.139) | 0.079 (0.050-0.113) | 0.063 (0.035-0.101) |
| Lao PDR                          | 0.274 (0.173-0.381) | 0.249 (0.179-0.324) | 0.222 (0.168-0.279) | 0.188 (0.145-0.237) | 0.157 (0.107-0.218) |
| Latvia                           | 0.067 (0.029-0.124) | 0.058 (0.033-0.092) | 0.057 (0.036-0.086) | 0.056 (0.036-0.082) | 0.051 (0.028-0.084) |
| Lebanon                          | 0.084 (0.038-0.152) | 0.063 (0.036-0.101) | 0.048 (0.029-0.073) | 0.036 (0.021-0.056) | 0.031 (0.017-0.051) |
| Lesotho                          | 0.185 (0.086-0.307) | 0.156 (0.090-0.233) | 0.124 (0.080-0.176) | 0.097 (0.065-0.136) | 0.077 (0.045-0.120) |
| Liberia                          | 0.200 (0.113-0.311) | 0.169 (0.111-0.238) | 0.154 (0.101-0.217) | 0.141 (0.101-0.185) | 0.122 (0.077-0.175) |
| Libya                            | 0.088 (0.034-0.175) | 0.057 (0.031-0.091) | 0.046 (0.029-0.068) | 0.038 (0.024-0.055) | 0.032 (0.017-0.051) |
| Lithuania                        | 0.077 (0.035-0.136) | 0.061 (0.036-0.092) | 0.057 (0.038-0.082) | 0.054 (0.035-0.076) | 0.047 (0.026-0.077) |
| Luxembourg                       | 0.096 (0.052-0.157) | 0.084 (0.052-0.123) | 0.073 (0.046-0.108) | 0.066 (0.043-0.093) | 0.063 (0.037-0.098) |
| Macedonia (TFYR)                 | 0.094 (0.044-0.166) | 0.080 (0.047-0.123) | 0.075 (0.048-0.109) | 0.072 (0.048-0.105) | 0.069 (0.039-0.108) |
| Madagascar                       | 0.207 (0.116-0.315) | 0.185 (0.126-0.254) | 0.165 (0.123-0.217) | 0.147 (0.111-0.189) | 0.131 (0.086-0.188) |
| Malawi                           | 0.226 (0.126-0.350) | 0.203 (0.137-0.282) | 0.181 (0.133-0.235) | 0.158 (0.119-0.201) | 0.134 (0.088-0.189) |
| Malaysia                         | 0.227 (0.136-0.335) | 0.187 (0.131-0.253) | 0.149 (0.110-0.194) | 0.120 (0.090-0.154) | 0.101 (0.065-0.146) |
| Maldives                         | 0.238 (0.141-0.350) | 0.202 (0.138-0.275) | 0.164 (0.113-0.221) | 0.123 (0.081-0.173) | 0.101 (0.060-0.154) |
| Mali                             | 0.222 (0.127-0.334) | 0.197 (0.135-0.268) | 0.174 (0.127-0.226) | 0.151 (0.114-0.192) | 0.132 (0.086-0.185) |
| Malta                            | 0.066 (0.027-0.130) | 0.057 (0.033-0.088) | 0.053 (0.033-0.078) | 0.046 (0.029-0.069) | 0.044 (0.023-0.074) |
| Marshall Islands                 | 0.032 (0.012-0.066) | 0.024 (0.011-0.043) | 0.019 (0.009-0.032) | 0.016 (0.008-0.028) | 0.015 (0.006-0.029) |
| Mauritania                       | 0.225 (0.127-0.343) | 0.188 (0.124-0.262) | 0.159 (0.109-0.215) | 0.138 (0.096-0.183) | 0.120 (0.074-0.176) |
| Mauritius                        | 0.167 (0.091-0.263) | 0.146 (0.095-0.206) | 0.123 (0.085-0.167) | 0.099 (0.067-0.136) | 0.079 (0.043-0.127) |
| Mexico                           | 0.083 (0.037-0.156) | 0.064 (0.038-0.099) | 0.050 (0.034-0.068) | 0.040 (0.028-0.054) | 0.034 (0.020-0.053) |
| Micronesia (Federated States of) | 0.050 (0.020-0.099) | 0.037 (0.018-0.063) | 0.028 (0.015-0.044) | 0.021 (0.011-0.032) | 0.016 (0.007-0.028) |
| Moldova                          | 0.100 (0.045-0.181) | 0.082 (0.047-0.128) | 0.076 (0.049-0.110) | 0.075 (0.049-0.107) | 0.065 (0.037-0.103) |
| Mongolia                         | 0.122 (0.048-0.230) | 0.101 (0.054-0.166) | 0.089 (0.055-0.132) | 0.078 (0.051-0.111) | 0.065 (0.037-0.102) |
| Montenegro                       | 0.116 (0.050-0.212) | 0.089 (0.049-0.142) | 0.077 (0.048-0.113) | 0.070 (0.045-0.102) | 0.066 (0.037-0.106) |
| Morocco                          | 0.130 (0.061-0.233) | 0.101 (0.062-0.155) | 0.078 (0.054-0.110) | 0.060 (0.041-0.084) | 0.046 (0.026-0.074) |
| Mozambique                       | 0.222 (0.118-0.348) | 0.197 (0.127-0.280) | 0.175 (0.125-0.233) | 0.157 (0.117-0.203) | 0.141 (0.094-0.199) |
| Myanmar                          | 0.244 (0.126-0.381) | 0.226 (0.147-0.317) | 0.204 (0.148-0.264) | 0.176 (0.131-0.223) | 0.140 (0.093-0.194) |
| Namibia                          | 0.166 (0.074-0.284) | 0.140 (0.082-0.215) | 0.117 (0.079-0.164) | 0.093 (0.065-0.128) | 0.078 (0.047-0.120) |
| Nauru                            | 0.011 (0.004-0.025) | 0.010 (0.004-0.019) | 0.010 (0.005-0.018) | 0.012 (0.005-0.021) | 0.012 (0.004-0.026) |
| Nepal                            | 0.236 (0.142-0.344) | 0.218 (0.150-0.291) | 0.195 (0.146-0.248) | 0.171 (0.130-0.215) | 0.149 (0.101-0.206) |
| Netherlands                      | 0.109 (0.062-0.169) | 0.095 (0.065-0.129) | 0.080 (0.058-0.107) | 0.067 (0.048-0.090) | 0.063 (0.040-0.093) |
| New Zealand                      | 0.090 (0.052-0.140) | 0.076 (0.052-0.105) | 0.063 (0.045-0.084) | 0.051 (0.037-0.067) | 0.044 (0.029-0.064) |
| Nicaragua                        | 0.104 (0.047-0.189) | 0.083 (0.048-0.131) | 0.070 (0.045-0.101) | 0.058 (0.039-0.081) | 0.050 (0.028-0.080) |
| Niger                            | 0.237 (0.139-0.351) | 0.217 (0.151-0.293) | 0.192 (0.143-0.247) | 0.168 (0.127-0.215) | 0.149 (0.099-0.206) |
| Nigeria                          | 0.208 (0.117-0.317) | 0.178 (0.123-0.241) | 0.153 (0.116-0.195) | 0.126 (0.097-0.158) | 0.101 (0.069-0.142) |
| Niue                             | 0.051 (0.019-0.104) | 0.032 (0.015-0.058) | 0.022 (0.011-0.039) | 0.015 (0.008-0.026) | 0.011 (0.004-0.021) |
| North Korea                      | 0.145 (0.070-0.247) | 0.138 (0.085-0.203) | 0.139 (0.092-0.194) | 0.151 (0.093-0.218) | 0.156 (0.078-0.254) |
| Norway                           | 0.103 (0.058-0.163) | 0.081 (0.055-0.113) | 0.068 (0.049-0.092) | 0.058 (0.041-0.079) | 0.055 (0.033-0.084) |

|                                  |                     |                     |                     |                     |                     |
|----------------------------------|---------------------|---------------------|---------------------|---------------------|---------------------|
| Occupied Palestinian Territory   | 0.088 (0.040-0.163) | 0.069 (0.040-0.111) | 0.057 (0.036-0.083) | 0.045 (0.029-0.064) | 0.037 (0.020-0.061) |
| Oman                             | 0.125 (0.053-0.229) | 0.084 (0.049-0.131) | 0.059 (0.040-0.086) | 0.046 (0.031-0.067) | 0.037 (0.020-0.060) |
| Pakistan                         | 0.210 (0.124-0.310) | 0.190 (0.132-0.255) | 0.171 (0.125-0.219) | 0.154 (0.113-0.197) | 0.139 (0.090-0.196) |
| Palau                            | 0.026 (0.009-0.056) | 0.021 (0.010-0.037) | 0.017 (0.008-0.029) | 0.014 (0.007-0.025) | 0.013 (0.006-0.025) |
| Panama                           | 0.091 (0.039-0.166) | 0.070 (0.039-0.113) | 0.057 (0.035-0.084) | 0.045 (0.029-0.065) | 0.037 (0.020-0.060) |
| Papua New Guinea                 | 0.120 (0.042-0.239) | 0.095 (0.043-0.167) | 0.075 (0.039-0.125) | 0.060 (0.033-0.098) | 0.048 (0.023-0.086) |
| Paraguay                         | 0.128 (0.059-0.222) | 0.106 (0.061-0.162) | 0.084 (0.053-0.123) | 0.070 (0.044-0.101) | 0.060 (0.033-0.095) |
| Peru                             | 0.071 (0.027-0.140) | 0.054 (0.028-0.093) | 0.046 (0.028-0.068) | 0.039 (0.026-0.053) | 0.033 (0.020-0.050) |
| Philippines                      | 0.227 (0.148-0.321) | 0.199 (0.152-0.251) | 0.171 (0.137-0.209) | 0.152 (0.119-0.189) | 0.133 (0.087-0.188) |
| Poland                           | 0.078 (0.040-0.134) | 0.068 (0.044-0.098) | 0.066 (0.045-0.089) | 0.062 (0.043-0.085) | 0.059 (0.036-0.091) |
| Portugal                         | 0.121 (0.060-0.200) | 0.103 (0.064-0.150) | 0.081 (0.055-0.111) | 0.065 (0.044-0.089) | 0.056 (0.032-0.088) |
| Puerto Rico                      | 0.088 (0.041-0.159) | 0.062 (0.036-0.099) | 0.047 (0.028-0.071) | 0.040 (0.024-0.060) | 0.036 (0.019-0.060) |
| Qatar                            | 0.059 (0.025-0.116) | 0.044 (0.021-0.075) | 0.037 (0.022-0.056) | 0.029 (0.017-0.044) | 0.024 (0.012-0.040) |
| Romania                          | 0.099 (0.048-0.171) | 0.079 (0.048-0.118) | 0.072 (0.048-0.102) | 0.069 (0.047-0.098) | 0.064 (0.036-0.102) |
| Russian Federation               | 0.067 (0.033-0.112) | 0.059 (0.040-0.080) | 0.058 (0.044-0.075) | 0.058 (0.042-0.077) | 0.055 (0.032-0.085) |
| Rwanda                           | 0.254 (0.136-0.381) | 0.229 (0.142-0.324) | 0.199 (0.134-0.269) | 0.168 (0.118-0.223) | 0.144 (0.092-0.208) |
| Saint Kitts and Nevis            | 0.120 (0.058-0.209) | 0.091 (0.052-0.140) | 0.073 (0.046-0.107) | 0.055 (0.033-0.081) | 0.041 (0.019-0.074) |
| Saint Lucia                      | 0.134 (0.067-0.227) | 0.107 (0.066-0.159) | 0.084 (0.055-0.117) | 0.061 (0.038-0.089) | 0.043 (0.020-0.075) |
| Saint Vincent and the Grenadines | 0.128 (0.062-0.224) | 0.102 (0.062-0.156) | 0.080 (0.051-0.115) | 0.062 (0.040-0.090) | 0.048 (0.025-0.080) |
| Samoa                            | 0.044 (0.017-0.088) | 0.030 (0.014-0.053) | 0.021 (0.011-0.035) | 0.014 (0.007-0.023) | 0.009 (0.004-0.018) |
| Sao Tome and Principe            | 0.187 (0.102-0.294) | 0.162 (0.106-0.230) | 0.131 (0.090-0.180) | 0.113 (0.080-0.151) | 0.099 (0.062-0.144) |
| Saudi Arabia                     | 0.093 (0.038-0.179) | 0.060 (0.036-0.091) | 0.046 (0.032-0.062) | 0.038 (0.026-0.052) | 0.031 (0.017-0.049) |
| Senegal                          | 0.187 (0.105-0.287) | 0.167 (0.114-0.230) | 0.149 (0.109-0.195) | 0.129 (0.096-0.169) | 0.113 (0.072-0.161) |
| Serbia                           | 0.108 (0.053-0.184) | 0.091 (0.057-0.132) | 0.083 (0.058-0.114) | 0.078 (0.054-0.105) | 0.074 (0.044-0.111) |
| Seychelles                       | 0.149 (0.077-0.246) | 0.118 (0.072-0.175) | 0.098 (0.064-0.138) | 0.076 (0.050-0.109) | 0.061 (0.034-0.099) |
| Sierra Leone                     | 0.198 (0.111-0.306) | 0.176 (0.116-0.246) | 0.159 (0.114-0.212) | 0.141 (0.105-0.181) | 0.118 (0.078-0.163) |
| Singapore                        | 0.147 (0.080-0.233) | 0.132 (0.091-0.179) | 0.126 (0.093-0.162) | 0.130 (0.097-0.165) | 0.125 (0.084-0.173) |
| Slovakia                         | 0.102 (0.051-0.172) | 0.084 (0.053-0.122) | 0.076 (0.051-0.105) | 0.072 (0.050-0.098) | 0.066 (0.039-0.103) |
| Slovenia                         | 0.106 (0.050-0.187) | 0.084 (0.051-0.126) | 0.075 (0.050-0.108) | 0.067 (0.044-0.094) | 0.062 (0.035-0.099) |
| Solomon Islands                  | 0.121 (0.042-0.247) | 0.093 (0.042-0.169) | 0.073 (0.038-0.120) | 0.058 (0.033-0.092) | 0.048 (0.024-0.085) |
| Somalia                          | 0.206 (0.109-0.321) | 0.187 (0.117-0.269) | 0.172 (0.118-0.238) | 0.158 (0.107-0.220) | 0.144 (0.085-0.217) |
| South Africa                     | 0.109 (0.047-0.194) | 0.091 (0.052-0.140) | 0.076 (0.051-0.105) | 0.062 (0.045-0.082) | 0.052 (0.033-0.077) |
| South Korea                      | 0.237 (0.155-0.326) | 0.178 (0.132-0.227) | 0.141 (0.105-0.179) | 0.133 (0.104-0.166) | 0.110 (0.074-0.156) |
| Spain                            | 0.090 (0.049-0.147) | 0.073 (0.049-0.101) | 0.062 (0.045-0.083) | 0.054 (0.038-0.073) | 0.050 (0.030-0.078) |
| Sri Lanka                        | 0.236 (0.139-0.344) | 0.212 (0.148-0.283) | 0.182 (0.135-0.234) | 0.149 (0.111-0.193) | 0.118 (0.070-0.178) |
| Sudan                            | 0.210 (0.116-0.322) | 0.186 (0.122-0.259) | 0.162 (0.113-0.216) | 0.140 (0.100-0.187) | 0.122 (0.076-0.176) |
| Suriname                         | 0.105 (0.049-0.188) | 0.078 (0.044-0.122) | 0.069 (0.043-0.102) | 0.057 (0.035-0.084) | 0.047 (0.025-0.080) |
| Swaziland                        | 0.182 (0.084-0.304) | 0.146 (0.083-0.219) | 0.114 (0.072-0.164) | 0.089 (0.057-0.126) | 0.070 (0.038-0.112) |
| Sweden                           | 0.089 (0.051-0.140) | 0.081 (0.057-0.110) | 0.075 (0.055-0.097) | 0.068 (0.050-0.088) | 0.063 (0.039-0.092) |
| Switzerland                      | 0.109 (0.057-0.181) | 0.090 (0.059-0.132) | 0.073 (0.051-0.102) | 0.068 (0.048-0.094) | 0.066 (0.040-0.101) |
| Syrian Arab Republic             | 0.114 (0.053-0.208) | 0.084 (0.050-0.132) | 0.069 (0.045-0.100) | 0.052 (0.034-0.075) | 0.040 (0.022-0.066) |
| Taiwan                           | 0.159 (0.082-0.253) | 0.130 (0.084-0.184) | 0.112 (0.079-0.151) | 0.104 (0.073-0.142) | 0.106 (0.060-0.165) |
| Tajikistan                       | 0.129 (0.053-0.239) | 0.111 (0.059-0.184) | 0.098 (0.059-0.146) | 0.086 (0.054-0.127) | 0.068 (0.037-0.110) |
| Tanzania                         | 0.215 (0.120-0.326) | 0.189 (0.128-0.259) | 0.168 (0.124-0.216) | 0.147 (0.112-0.186) | 0.125 (0.084-0.172) |
| Thailand                         | 0.244 (0.146-0.354) | 0.210 (0.150-0.276) | 0.178 (0.133-0.222) | 0.142 (0.106-0.177) | 0.117 (0.074-0.166) |
| Timor-Leste                      | 0.261 (0.162-0.366) | 0.239 (0.170-0.313) | 0.214 (0.159-0.274) | 0.191 (0.143-0.242) | 0.170 (0.113-0.233) |
| Togo                             | 0.215 (0.124-0.324) | 0.190 (0.130-0.262) | 0.166 (0.121-0.216) | 0.143 (0.107-0.181) | 0.124 (0.083-0.173) |
| Tokelau                          | 0.070 (0.021-0.163) | 0.046 (0.019-0.089) | 0.030 (0.014-0.052) | 0.019 (0.010-0.034) | 0.013 (0.005-0.027) |
| Tonga                            | 0.044 (0.016-0.091) | 0.030 (0.014-0.053) | 0.020 (0.010-0.034) | 0.014 (0.007-0.023) | 0.010 (0.004-0.019) |
| Trinidad and Tobago              | 0.153 (0.063-0.281) | 0.119 (0.061-0.199) | 0.091 (0.056-0.134) | 0.062 (0.035-0.095) | 0.042 (0.016-0.083) |
| Tunisia                          | 0.108 (0.050-0.196) | 0.081 (0.049-0.126) | 0.063 (0.042-0.091) | 0.048 (0.032-0.068) | 0.037 (0.021-0.059) |
| Turkey                           | 0.108 (0.051-0.191) | 0.078 (0.048-0.116) | 0.055 (0.039-0.074) | 0.040 (0.029-0.053) | 0.031 (0.019-0.046) |
| Turkmenistan                     | 0.115 (0.047-0.219) | 0.099 (0.053-0.161) | 0.084 (0.050-0.126) | 0.071 (0.045-0.104) | 0.055 (0.030-0.091) |
| Tuvalu                           | 0.051 (0.021-0.098) | 0.035 (0.017-0.060) | 0.023 (0.012-0.039) | 0.017 (0.009-0.029) | 0.014 (0.006-0.027) |
| Uganda                           | 0.225 (0.124-0.345) | 0.206 (0.132-0.291) | 0.183 (0.125-0.250) | 0.159 (0.112-0.211) | 0.131 (0.086-0.188) |
| Ukraine                          | 0.073 (0.032-0.133) | 0.062 (0.036-0.097) | 0.060 (0.038-0.088) | 0.061 (0.039-0.088) | 0.057 (0.030-0.093) |
| United Arab Emirates             | 0.059 (0.019-0.130) | 0.044 (0.023-0.077) | 0.036 (0.022-0.055) | 0.028 (0.018-0.042) | 0.026 (0.014-0.043) |
| United Kingdom                   | 0.085 (0.050-0.130) | 0.072 (0.053-0.093) | 0.061 (0.049-0.074) | 0.051 (0.041-0.062) | 0.044 (0.031-0.060) |
| United States of America         | 0.088 (0.056-0.127) | 0.072 (0.053-0.095) | 0.059 (0.045-0.077) | 0.049 (0.037-0.063) | 0.043 (0.028-0.061) |
| Uruguay                          | 0.071 (0.028-0.137) | 0.062 (0.033-0.102) | 0.056 (0.034-0.085) | 0.052 (0.033-0.076) | 0.049 (0.027-0.078) |
| Uzbekistan                       | 0.126 (0.054-0.236) | 0.104 (0.055-0.173) | 0.089 (0.054-0.133) | 0.076 (0.047-0.111) | 0.060 (0.031-0.099) |
| Vanuatu                          | 0.106 (0.036-0.214) | 0.080 (0.036-0.143) | 0.061 (0.033-0.100) | 0.048 (0.028-0.076) | 0.039 (0.019-0.069) |
| Venezuela                        | 0.071 (0.031-0.136) | 0.057 (0.032-0.094) | 0.048 (0.030-0.072) | 0.042 (0.028-0.060) | 0.038 (0.022-0.062) |
| Viet Nam                         | 0.245 (0.154-0.346) | 0.229 (0.170-0.294) | 0.207 (0.166-0.253) | 0.178 (0.144-0.217) | 0.147 (0.101-0.201) |
| Yemen                            | 0.165 (0.078-0.289) | 0.134 (0.078-0.205) | 0.105 (0.069-0.151) | 0.081 (0.054-0.116) | 0.065 (0.037-0.103) |
| Zambia                           | 0.184 (0.100-0.287) | 0.160 (0.106-0.225) | 0.148 (0.107-0.196) | 0.133 (0.099-0.173) | 0.112 (0.074-0.163) |
| Zimbabwe                         | 0.165 (0.077-0.272) | 0.134 (0.081-0.198) | 0.110 (0.074-0.150) | 0.092 (0.064-0.125) | 0.081 (0.048-0.126) |

**Men, 20 ≤ BMI < 25 kg/m<sup>2</sup>**

| Country                  | Year                |                     |                     |                     |                     |
|--------------------------|---------------------|---------------------|---------------------|---------------------|---------------------|
|                          | 1975                | 1985                | 1995                | 2005                | 2014                |
| Afghanistan              | 0.419 (0.299-0.552) | 0.437 (0.342-0.542) | 0.456 (0.371-0.548) | 0.474 (0.388-0.561) | 0.481 (0.383-0.584) |
| Albania                  | 0.543 (0.425-0.655) | 0.527 (0.447-0.608) | 0.509 (0.440-0.578) | 0.448 (0.389-0.506) | 0.384 (0.310-0.461) |
| Algeria                  | 0.485 (0.373-0.596) | 0.469 (0.394-0.543) | 0.449 (0.390-0.507) | 0.423 (0.374-0.473) | 0.386 (0.321-0.454) |
| American Samoa           | 0.328 (0.244-0.423) | 0.284 (0.226-0.346) | 0.241 (0.192-0.294) | 0.210 (0.163-0.259) | 0.190 (0.136-0.251) |
| Andorra                  | 0.459 (0.368-0.550) | 0.410 (0.349-0.474) | 0.364 (0.312-0.417) | 0.309 (0.265-0.356) | 0.284 (0.226-0.347) |
| Angola                   | 0.442 (0.318-0.577) | 0.450 (0.348-0.558) | 0.463 (0.366-0.563) | 0.466 (0.371-0.563) | 0.467 (0.356-0.580) |
| Antigua and Barbuda      | 0.513 (0.394-0.628) | 0.507 (0.421-0.587) | 0.470 (0.397-0.539) | 0.443 (0.374-0.509) | 0.395 (0.304-0.488) |
| Argentina                | 0.481 (0.374-0.591) | 0.447 (0.371-0.528) | 0.410 (0.350-0.472) | 0.362 (0.311-0.413) | 0.309 (0.246-0.374) |
| Armenia                  | 0.541 (0.399-0.675) | 0.524 (0.421-0.623) | 0.517 (0.430-0.604) | 0.479 (0.405-0.551) | 0.402 (0.322-0.490) |
| Australia                | 0.472 (0.397-0.549) | 0.427 (0.380-0.475) | 0.381 (0.343-0.419) | 0.329 (0.296-0.363) | 0.284 (0.236-0.334) |
| Austria                  | 0.508 (0.427-0.590) | 0.462 (0.411-0.516) | 0.418 (0.370-0.467) | 0.379 (0.336-0.425) | 0.348 (0.284-0.416) |
| Azerbaijan               | 0.528 (0.408-0.640) | 0.513 (0.422-0.601) | 0.512 (0.429-0.590) | 0.487 (0.413-0.556) | 0.402 (0.318-0.488) |
| Bahamas                  | 0.476 (0.372-0.580) | 0.456 (0.383-0.532) | 0.416 (0.355-0.481) | 0.373 (0.319-0.429) | 0.338 (0.269-0.410) |
| Bahrain                  | 0.420 (0.315-0.524) | 0.405 (0.341-0.471) | 0.374 (0.324-0.426) | 0.336 (0.294-0.381) | 0.302 (0.244-0.362) |
| Bangladesh               | 0.403 (0.293-0.517) | 0.414 (0.336-0.496) | 0.426 (0.363-0.492) | 0.443 (0.382-0.503) | 0.458 (0.378-0.540) |
| Barbados                 | 0.506 (0.401-0.613) | 0.496 (0.424-0.568) | 0.479 (0.420-0.539) | 0.450 (0.389-0.508) | 0.405 (0.322-0.490) |
| Belarus                  | 0.537 (0.426-0.637) | 0.502 (0.429-0.571) | 0.469 (0.408-0.529) | 0.426 (0.371-0.480) | 0.360 (0.289-0.433) |
| Belgium                  | 0.504 (0.414-0.590) | 0.451 (0.400-0.500) | 0.395 (0.356-0.436) | 0.344 (0.306-0.381) | 0.314 (0.261-0.372) |
| Belize                   | 0.525 (0.400-0.644) | 0.516 (0.432-0.600) | 0.500 (0.434-0.566) | 0.468 (0.409-0.527) | 0.430 (0.351-0.508) |
| Benin                    | 0.536 (0.410-0.657) | 0.544 (0.451-0.634) | 0.547 (0.472-0.621) | 0.551 (0.485-0.615) | 0.546 (0.467-0.625) |
| Bermuda                  | 0.432 (0.321-0.545) | 0.395 (0.315-0.481) | 0.358 (0.291-0.429) | 0.325 (0.267-0.385) | 0.272 (0.206-0.345) |
| Bhutan                   | 0.463 (0.338-0.593) | 0.478 (0.384-0.575) | 0.491 (0.410-0.576) | 0.507 (0.434-0.582) | 0.514 (0.425-0.599) |
| Bolivia                  | 0.585 (0.457-0.701) | 0.571 (0.478-0.660) | 0.544 (0.462-0.622) | 0.500 (0.430-0.569) | 0.452 (0.367-0.535) |
| Bosnia and Herzegovina   | 0.601 (0.442-0.742) | 0.586 (0.480-0.686) | 0.559 (0.476-0.638) | 0.471 (0.406-0.536) | 0.417 (0.343-0.490) |
| Botswana                 | 0.472 (0.351-0.601) | 0.477 (0.384-0.572) | 0.481 (0.400-0.564) | 0.476 (0.401-0.550) | 0.459 (0.371-0.545) |
| Brazil                   | 0.543 (0.439-0.647) | 0.517 (0.452-0.585) | 0.483 (0.429-0.534) | 0.439 (0.395-0.483) | 0.386 (0.323-0.449) |
| Brunei Darussalam        | 0.450 (0.295-0.603) | 0.462 (0.343-0.580) | 0.460 (0.369-0.546) | 0.440 (0.365-0.514) | 0.409 (0.315-0.504) |
| Bulgaria                 | 0.491 (0.389-0.590) | 0.440 (0.375-0.505) | 0.404 (0.348-0.460) | 0.383 (0.331-0.435) | 0.339 (0.272-0.411) |
| Burkina Faso             | 0.513 (0.383-0.645) | 0.523 (0.429-0.616) | 0.525 (0.449-0.601) | 0.530 (0.463-0.597) | 0.531 (0.449-0.611) |
| Burundi                  | 0.469 (0.323-0.622) | 0.484 (0.364-0.607) | 0.502 (0.397-0.608) | 0.518 (0.426-0.615) | 0.527 (0.425-0.632) |
| Cabo Verde               | 0.520 (0.386-0.657) | 0.529 (0.435-0.623) | 0.527 (0.450-0.607) | 0.519 (0.452-0.585) | 0.496 (0.411-0.577) |
| Cambodia                 | 0.458 (0.328-0.590) | 0.466 (0.376-0.559) | 0.476 (0.400-0.556) | 0.497 (0.428-0.568) | 0.521 (0.436-0.606) |
| Cameroon                 | 0.554 (0.437-0.666) | 0.562 (0.480-0.640) | 0.564 (0.500-0.627) | 0.560 (0.505-0.613) | 0.552 (0.474-0.628) |
| Canada                   | 0.490 (0.412-0.567) | 0.442 (0.395-0.489) | 0.389 (0.348-0.432) | 0.331 (0.295-0.369) | 0.293 (0.241-0.348) |
| Central African Republic | 0.471 (0.332-0.621) | 0.480 (0.365-0.598) | 0.475 (0.376-0.576) | 0.479 (0.387-0.573) | 0.480 (0.374-0.587) |
| Chad                     | 0.505 (0.381-0.630) | 0.522 (0.430-0.618) | 0.532 (0.451-0.610) | 0.542 (0.469-0.614) | 0.534 (0.445-0.620) |
| Chile                    | 0.528 (0.413-0.642) | 0.494 (0.413-0.574) | 0.444 (0.386-0.503) | 0.382 (0.335-0.430) | 0.329 (0.270-0.392) |
| China                    | 0.596 (0.497-0.690) | 0.593 (0.547-0.639) | 0.583 (0.551-0.614) | 0.558 (0.524-0.591) | 0.503 (0.443-0.559) |
| China (Hong Kong SAR)    | 0.530 (0.401-0.651) | 0.514 (0.432-0.596) | 0.492 (0.423-0.563) | 0.456 (0.388-0.524) | 0.396 (0.310-0.492) |
| Colombia                 | 0.546 (0.430-0.658) | 0.523 (0.447-0.601) | 0.487 (0.429-0.547) | 0.443 (0.397-0.491) | 0.397 (0.332-0.464) |
| Comoros                  | 0.538 (0.415-0.661) | 0.543 (0.447-0.638) | 0.548 (0.464-0.627) | 0.553 (0.480-0.625) | 0.554 (0.468-0.637) |
| Congo                    | 0.465 (0.346-0.585) | 0.474 (0.383-0.565) | 0.480 (0.398-0.562) | 0.472 (0.389-0.552) | 0.463 (0.363-0.563) |
| Cook Islands             | 0.383 (0.282-0.497) | 0.326 (0.264-0.393) | 0.265 (0.211-0.323) | 0.216 (0.171-0.264) | 0.183 (0.134-0.239) |
| Costa Rica               | 0.536 (0.419-0.649) | 0.513 (0.434-0.590) | 0.472 (0.411-0.534) | 0.422 (0.370-0.470) | 0.367 (0.301-0.433) |
| Cote d'Ivoire            | 0.547 (0.430-0.662) | 0.558 (0.472-0.642) | 0.561 (0.488-0.632) | 0.561 (0.498-0.622) | 0.552 (0.473-0.626) |
| Croatia                  | 0.529 (0.414-0.637) | 0.491 (0.420-0.562) | 0.456 (0.396-0.517) | 0.398 (0.345-0.453) | 0.336 (0.268-0.407) |
| Cuba                     | 0.479 (0.373-0.585) | 0.458 (0.385-0.532) | 0.442 (0.380-0.506) | 0.424 (0.367-0.482) | 0.375 (0.304-0.450) |
| Cyprus                   | 0.537 (0.434-0.635) | 0.494 (0.427-0.560) | 0.422 (0.368-0.479) | 0.367 (0.319-0.417) | 0.334 (0.268-0.406) |
| Czech Republic           | 0.449 (0.352-0.543) | 0.402 (0.343-0.462) | 0.367 (0.316-0.418) | 0.330 (0.285-0.376) | 0.293 (0.231-0.356) |
| Denmark                  | 0.514 (0.438-0.586) | 0.467 (0.422-0.514) | 0.410 (0.368-0.453) | 0.358 (0.317-0.401) | 0.330 (0.273-0.390) |
| Djibouti                 | 0.499 (0.363-0.636) | 0.510 (0.388-0.629) | 0.504 (0.407-0.599) | 0.495 (0.403-0.584) | 0.479 (0.370-0.587) |
| Dominica                 | 0.526 (0.409-0.640) | 0.526 (0.443-0.610) | 0.489 (0.422-0.555) | 0.454 (0.393-0.514) | 0.407 (0.333-0.483) |
| Dominican Republic       | 0.533 (0.416-0.648) | 0.525 (0.446-0.602) | 0.508 (0.444-0.571) | 0.466 (0.409-0.521) | 0.409 (0.331-0.486) |
| DR Congo                 | 0.454 (0.329-0.582) | 0.464 (0.363-0.568) | 0.470 (0.376-0.566) | 0.471 (0.378-0.562) | 0.471 (0.360-0.582) |
| Ecuador                  | 0.591 (0.465-0.709) | 0.570 (0.478-0.659) | 0.533 (0.454-0.610) | 0.488 (0.420-0.556) | 0.431 (0.351-0.513) |
| Egypt                    | 0.529 (0.410-0.641) | 0.497 (0.428-0.565) | 0.468 (0.415-0.520) | 0.435 (0.389-0.480) | 0.389 (0.325-0.457) |
| El Salvador              | 0.552 (0.432-0.667) | 0.538 (0.451-0.620) | 0.510 (0.442-0.576) | 0.463 (0.407-0.519) | 0.417 (0.344-0.490) |
| Equatorial Guinea        | 0.474 (0.333-0.622) | 0.483 (0.371-0.599) | 0.488 (0.386-0.594) | 0.468 (0.362-0.574) | 0.446 (0.317-0.577) |
| Eritrea                  | 0.462 (0.344-0.587) | 0.472 (0.382-0.565) | 0.481 (0.404-0.558) | 0.486 (0.417-0.555) | 0.489 (0.403-0.574) |
| Estonia                  | 0.526 (0.423-0.622) | 0.495 (0.435-0.555) | 0.473 (0.424-0.522) | 0.420 (0.381-0.461) | 0.366 (0.306-0.427) |
| Ethiopia                 | 0.475 (0.349-0.608) | 0.486 (0.390-0.584) | 0.491 (0.408-0.574) | 0.489 (0.419-0.560) | 0.488 (0.400-0.575) |
| Fiji                     | 0.495 (0.356-0.622) | 0.459 (0.355-0.560) | 0.425 (0.337-0.517) | 0.384 (0.309-0.460) | 0.358 (0.276-0.441) |
| Finland                  | 0.540 (0.459-0.621) | 0.486 (0.440-0.534) | 0.432 (0.391-0.473) | 0.389 (0.353-0.426) | 0.360 (0.305-0.418) |
| France                   | 0.471 (0.382-0.556) | 0.426 (0.370-0.483) | 0.381 (0.335-0.429) | 0.337 (0.293-0.382) | 0.308 (0.249-0.371) |
| French Polynesia         | 0.304 (0.212-0.405) | 0.262 (0.194-0.335) | 0.223 (0.169-0.284) | 0.193 (0.148-0.242) | 0.167 (0.120-0.220) |



|                                  |                     |                     |                     |                     |                     |
|----------------------------------|---------------------|---------------------|---------------------|---------------------|---------------------|
| Gabon                            | 0.470 (0.342-0.605) | 0.481 (0.375-0.587) | 0.480 (0.380-0.574) | 0.466 (0.375-0.556) | 0.441 (0.339-0.544) |
| Gambia                           | 0.508 (0.387-0.628) | 0.515 (0.425-0.600) | 0.519 (0.443-0.591) | 0.522 (0.456-0.587) | 0.511 (0.427-0.593) |
| Georgia                          | 0.528 (0.403-0.649) | 0.502 (0.410-0.592) | 0.507 (0.419-0.587) | 0.468 (0.393-0.538) | 0.419 (0.339-0.500) |
| Germany                          | 0.516 (0.437-0.592) | 0.454 (0.411-0.497) | 0.405 (0.368-0.442) | 0.373 (0.338-0.408) | 0.341 (0.286-0.399) |
| Ghana                            | 0.538 (0.424-0.651) | 0.548 (0.466-0.630) | 0.553 (0.485-0.621) | 0.563 (0.499-0.626) | 0.552 (0.470-0.629) |
| Greece                           | 0.495 (0.404-0.586) | 0.439 (0.380-0.499) | 0.392 (0.341-0.444) | 0.344 (0.299-0.391) | 0.311 (0.250-0.376) |
| Greenland                        | 0.502 (0.421-0.586) | 0.449 (0.395-0.504) | 0.403 (0.357-0.451) | 0.359 (0.319-0.402) | 0.321 (0.264-0.386) |
| Grenada                          | 0.535 (0.419-0.649) | 0.531 (0.448-0.611) | 0.509 (0.442-0.574) | 0.480 (0.419-0.538) | 0.435 (0.356-0.516) |
| Guatemala                        | 0.548 (0.426-0.667) | 0.538 (0.454-0.620) | 0.516 (0.449-0.581) | 0.482 (0.425-0.538) | 0.443 (0.365-0.520) |
| Guinea                           | 0.519 (0.383-0.656) | 0.524 (0.426-0.621) | 0.524 (0.441-0.606) | 0.531 (0.461-0.600) | 0.533 (0.450-0.614) |
| Guinea Bissau                    | 0.515 (0.390-0.641) | 0.517 (0.423-0.616) | 0.518 (0.435-0.601) | 0.524 (0.449-0.598) | 0.524 (0.435-0.611) |
| Guyana                           | 0.515 (0.401-0.627) | 0.517 (0.433-0.599) | 0.520 (0.449-0.587) | 0.492 (0.428-0.557) | 0.450 (0.364-0.534) |
| Haiti                            | 0.523 (0.395-0.648) | 0.535 (0.440-0.632) | 0.538 (0.452-0.623) | 0.527 (0.450-0.602) | 0.502 (0.404-0.598) |
| Honduras                         | 0.556 (0.434-0.678) | 0.546 (0.460-0.634) | 0.523 (0.455-0.591) | 0.486 (0.429-0.543) | 0.444 (0.365-0.520) |
| Hungary                          | 0.457 (0.362-0.545) | 0.410 (0.353-0.466) | 0.376 (0.324-0.429) | 0.349 (0.303-0.395) | 0.308 (0.247-0.373) |
| Iceland                          | 0.524 (0.438-0.609) | 0.463 (0.405-0.525) | 0.419 (0.369-0.472) | 0.377 (0.331-0.424) | 0.336 (0.273-0.403) |
| India                            | 0.369 (0.275-0.463) | 0.388 (0.327-0.448) | 0.401 (0.358-0.443) | 0.418 (0.380-0.456) | 0.432 (0.369-0.500) |
| Indonesia                        | 0.452 (0.350-0.555) | 0.461 (0.395-0.530) | 0.472 (0.419-0.527) | 0.489 (0.439-0.540) | 0.494 (0.421-0.566) |
| Iran                             | 0.467 (0.359-0.568) | 0.457 (0.394-0.517) | 0.442 (0.399-0.485) | 0.406 (0.375-0.439) | 0.356 (0.300-0.411) |
| Iraq                             | 0.489 (0.376-0.598) | 0.464 (0.391-0.535) | 0.448 (0.387-0.507) | 0.432 (0.382-0.482) | 0.387 (0.320-0.455) |
| Ireland                          | 0.510 (0.416-0.604) | 0.462 (0.397-0.527) | 0.410 (0.355-0.462) | 0.344 (0.296-0.390) | 0.309 (0.251-0.373) |
| Israel                           | 0.470 (0.373-0.569) | 0.424 (0.360-0.488) | 0.373 (0.322-0.424) | 0.328 (0.283-0.375) | 0.294 (0.236-0.357) |
| Italy                            | 0.490 (0.408-0.574) | 0.446 (0.399-0.493) | 0.401 (0.365-0.440) | 0.353 (0.317-0.389) | 0.321 (0.263-0.379) |
| Jamaica                          | 0.495 (0.392-0.600) | 0.497 (0.430-0.566) | 0.484 (0.430-0.540) | 0.455 (0.405-0.507) | 0.413 (0.341-0.483) |
| Japan                            | 0.597 (0.543-0.647) | 0.609 (0.577-0.640) | 0.606 (0.577-0.635) | 0.594 (0.565-0.624) | 0.576 (0.518-0.630) |
| Jordan                           | 0.514 (0.397-0.631) | 0.473 (0.406-0.540) | 0.430 (0.375-0.482) | 0.385 (0.340-0.430) | 0.335 (0.274-0.400) |
| Kazakhstan                       | 0.510 (0.390-0.624) | 0.490 (0.402-0.574) | 0.468 (0.391-0.544) | 0.431 (0.362-0.500) | 0.362 (0.280-0.447) |
| Kenya                            | 0.486 (0.369-0.612) | 0.503 (0.413-0.599) | 0.515 (0.434-0.597) | 0.519 (0.443-0.593) | 0.520 (0.427-0.611) |
| Kiribati                         | 0.421 (0.314-0.532) | 0.395 (0.318-0.478) | 0.362 (0.292-0.437) | 0.315 (0.258-0.380) | 0.295 (0.222-0.380) |
| Kuwait                           | 0.399 (0.288-0.505) | 0.368 (0.305-0.430) | 0.336 (0.291-0.383) | 0.281 (0.241-0.320) | 0.249 (0.198-0.304) |
| Kyrgyzstan                       | 0.549 (0.413-0.677) | 0.540 (0.443-0.631) | 0.530 (0.447-0.609) | 0.516 (0.440-0.589) | 0.475 (0.388-0.560) |
| Lao PDR                          | 0.458 (0.347-0.573) | 0.472 (0.389-0.558) | 0.485 (0.412-0.562) | 0.504 (0.439-0.575) | 0.520 (0.438-0.602) |
| Latvia                           | 0.511 (0.407-0.611) | 0.475 (0.407-0.538) | 0.453 (0.396-0.510) | 0.412 (0.362-0.462) | 0.339 (0.271-0.408) |
| Lebanon                          | 0.479 (0.373-0.579) | 0.446 (0.377-0.516) | 0.395 (0.336-0.457) | 0.343 (0.287-0.399) | 0.319 (0.258-0.385) |
| Lesotho                          | 0.491 (0.363-0.626) | 0.498 (0.404-0.596) | 0.504 (0.422-0.585) | 0.506 (0.433-0.578) | 0.503 (0.417-0.586) |
| Liberia                          | 0.543 (0.421-0.661) | 0.550 (0.457-0.643) | 0.563 (0.466-0.655) | 0.564 (0.493-0.633) | 0.559 (0.475-0.642) |
| Libya                            | 0.448 (0.328-0.566) | 0.405 (0.339-0.471) | 0.379 (0.328-0.431) | 0.355 (0.312-0.397) | 0.329 (0.270-0.391) |
| Lithuania                        | 0.529 (0.425-0.622) | 0.489 (0.423-0.554) | 0.459 (0.403-0.515) | 0.411 (0.361-0.460) | 0.341 (0.274-0.408) |
| Luxembourg                       | 0.503 (0.421-0.589) | 0.451 (0.393-0.514) | 0.392 (0.334-0.454) | 0.346 (0.300-0.394) | 0.309 (0.250-0.377) |
| Macedonia (TFYR)                 | 0.516 (0.407-0.621) | 0.483 (0.411-0.555) | 0.453 (0.389-0.519) | 0.414 (0.359-0.472) | 0.367 (0.294-0.441) |
| Madagascar                       | 0.486 (0.372-0.606) | 0.500 (0.413-0.589) | 0.510 (0.434-0.587) | 0.514 (0.444-0.584) | 0.511 (0.420-0.599) |
| Malawi                           | 0.507 (0.374-0.643) | 0.517 (0.423-0.614) | 0.521 (0.441-0.603) | 0.530 (0.458-0.601) | 0.539 (0.453-0.624) |
| Malaysia                         | 0.480 (0.374-0.586) | 0.500 (0.424-0.575) | 0.508 (0.445-0.570) | 0.493 (0.442-0.544) | 0.458 (0.385-0.530) |
| Maldives                         | 0.503 (0.385-0.621) | 0.512 (0.424-0.601) | 0.534 (0.452-0.615) | 0.546 (0.464-0.625) | 0.518 (0.431-0.604) |
| Mali                             | 0.510 (0.381-0.637) | 0.518 (0.425-0.610) | 0.513 (0.432-0.592) | 0.515 (0.442-0.584) | 0.513 (0.428-0.598) |
| Malta                            | 0.487 (0.357-0.613) | 0.423 (0.353-0.492) | 0.377 (0.323-0.432) | 0.322 (0.274-0.370) | 0.284 (0.222-0.351) |
| Marshall Islands                 | 0.385 (0.279-0.505) | 0.346 (0.274-0.427) | 0.298 (0.240-0.359) | 0.267 (0.212-0.326) | 0.243 (0.176-0.321) |
| Mauritania                       | 0.498 (0.378-0.623) | 0.509 (0.415-0.604) | 0.508 (0.427-0.593) | 0.507 (0.433-0.579) | 0.497 (0.407-0.586) |
| Mauritius                        | 0.515 (0.403-0.626) | 0.522 (0.446-0.599) | 0.515 (0.448-0.582) | 0.495 (0.431-0.559) | 0.467 (0.377-0.554) |
| Mexico                           | 0.525 (0.415-0.632) | 0.482 (0.413-0.555) | 0.431 (0.379-0.484) | 0.377 (0.335-0.417) | 0.328 (0.272-0.388) |
| Micronesia (Federated States of) | 0.416 (0.308-0.532) | 0.385 (0.311-0.465) | 0.350 (0.286-0.417) | 0.317 (0.265-0.374) | 0.288 (0.221-0.360) |
| Moldova                          | 0.549 (0.436-0.652) | 0.528 (0.452-0.601) | 0.519 (0.455-0.584) | 0.508 (0.446-0.569) | 0.452 (0.375-0.529) |
| Mongolia                         | 0.551 (0.412-0.682) | 0.536 (0.441-0.628) | 0.522 (0.441-0.599) | 0.494 (0.424-0.563) | 0.438 (0.357-0.519) |
| Montenegro                       | 0.490 (0.366-0.609) | 0.451 (0.373-0.530) | 0.424 (0.363-0.484) | 0.382 (0.331-0.434) | 0.339 (0.271-0.410) |
| Morocco                          | 0.513 (0.392-0.632) | 0.502 (0.423-0.580) | 0.480 (0.416-0.543) | 0.452 (0.397-0.506) | 0.412 (0.339-0.483) |
| Mozambique                       | 0.525 (0.380-0.666) | 0.533 (0.423-0.640) | 0.533 (0.445-0.620) | 0.533 (0.458-0.608) | 0.529 (0.440-0.619) |
| Myanmar                          | 0.459 (0.315-0.612) | 0.468 (0.368-0.573) | 0.477 (0.399-0.555) | 0.488 (0.426-0.552) | 0.506 (0.433-0.584) |
| Namibia                          | 0.478 (0.355-0.606) | 0.490 (0.397-0.583) | 0.496 (0.416-0.573) | 0.497 (0.428-0.566) | 0.487 (0.403-0.569) |
| Nauru                            | 0.262 (0.183-0.354) | 0.222 (0.169-0.279) | 0.203 (0.156-0.253) | 0.202 (0.154-0.255) | 0.191 (0.129-0.264) |
| Nepal                            | 0.440 (0.323-0.564) | 0.455 (0.368-0.549) | 0.469 (0.398-0.547) | 0.488 (0.422-0.557) | 0.501 (0.418-0.586) |
| Netherlands                      | 0.518 (0.435-0.598) | 0.484 (0.433-0.535) | 0.440 (0.396-0.484) | 0.384 (0.346-0.423) | 0.348 (0.292-0.405) |
| New Zealand                      | 0.481 (0.396-0.564) | 0.436 (0.381-0.490) | 0.387 (0.343-0.431) | 0.338 (0.302-0.373) | 0.291 (0.246-0.340) |
| Nicaragua                        | 0.541 (0.425-0.657) | 0.533 (0.451-0.617) | 0.523 (0.455-0.593) | 0.491 (0.433-0.548) | 0.453 (0.372-0.533) |
| Niger                            | 0.487 (0.363-0.614) | 0.492 (0.398-0.588) | 0.498 (0.418-0.578) | 0.504 (0.433-0.574) | 0.510 (0.421-0.597) |
| Nigeria                          | 0.499 (0.390-0.609) | 0.516 (0.442-0.587) | 0.519 (0.461-0.577) | 0.525 (0.476-0.574) | 0.515 (0.446-0.582) |
| Niue                             | 0.414 (0.298-0.538) | 0.357 (0.281-0.440) | 0.303 (0.242-0.369) | 0.253 (0.204-0.306) | 0.206 (0.152-0.267) |
| North Korea                      | 0.567 (0.440-0.688) | 0.573 (0.480-0.659) | 0.573 (0.487-0.652) | 0.569 (0.476-0.658) | 0.563 (0.444-0.673) |
| Norway                           | 0.514 (0.433-0.596) | 0.464 (0.413-0.515) | 0.415 (0.372-0.460) | 0.361 (0.322-0.402) | 0.323 (0.266-0.383) |

|                                  |                     |                     |                     |                     |                     |
|----------------------------------|---------------------|---------------------|---------------------|---------------------|---------------------|
| Occupied Palestinian Territory   | 0.499 (0.380-0.609) | 0.482 (0.402-0.561) | 0.461 (0.397-0.524) | 0.425 (0.373-0.479) | 0.397 (0.321-0.477) |
| Oman                             | 0.462 (0.344-0.576) | 0.441 (0.370-0.510) | 0.403 (0.351-0.455) | 0.366 (0.323-0.410) | 0.325 (0.263-0.390) |
| Pakistan                         | 0.426 (0.316-0.539) | 0.444 (0.366-0.522) | 0.458 (0.393-0.525) | 0.472 (0.408-0.536) | 0.479 (0.395-0.561) |
| Palau                            | 0.330 (0.230-0.438) | 0.296 (0.235-0.362) | 0.255 (0.202-0.312) | 0.220 (0.176-0.270) | 0.195 (0.144-0.253) |
| Panama                           | 0.531 (0.417-0.646) | 0.509 (0.432-0.586) | 0.475 (0.415-0.539) | 0.427 (0.377-0.475) | 0.369 (0.302-0.438) |
| Papua New Guinea                 | 0.570 (0.426-0.701) | 0.562 (0.456-0.662) | 0.540 (0.447-0.629) | 0.520 (0.436-0.603) | 0.492 (0.395-0.586) |
| Paraguay                         | 0.584 (0.463-0.698) | 0.562 (0.478-0.644) | 0.525 (0.457-0.593) | 0.477 (0.416-0.536) | 0.428 (0.347-0.502) |
| Peru                             | 0.585 (0.467-0.696) | 0.563 (0.472-0.649) | 0.531 (0.454-0.606) | 0.489 (0.425-0.551) | 0.430 (0.354-0.504) |
| Philippines                      | 0.488 (0.380-0.595) | 0.502 (0.426-0.575) | 0.512 (0.448-0.577) | 0.515 (0.455-0.573) | 0.510 (0.428-0.590) |
| Poland                           | 0.474 (0.378-0.563) | 0.440 (0.382-0.497) | 0.411 (0.362-0.459) | 0.367 (0.325-0.409) | 0.321 (0.264-0.381) |
| Portugal                         | 0.543 (0.441-0.638) | 0.518 (0.453-0.580) | 0.465 (0.413-0.515) | 0.397 (0.353-0.442) | 0.353 (0.291-0.419) |
| Puerto Rico                      | 0.507 (0.402-0.612) | 0.480 (0.405-0.554) | 0.425 (0.357-0.488) | 0.369 (0.312-0.426) | 0.320 (0.252-0.393) |
| Qatar                            | 0.448 (0.339-0.556) | 0.373 (0.299-0.449) | 0.343 (0.289-0.396) | 0.290 (0.244-0.337) | 0.248 (0.193-0.309) |
| Romania                          | 0.500 (0.390-0.605) | 0.455 (0.389-0.523) | 0.430 (0.374-0.486) | 0.390 (0.340-0.441) | 0.332 (0.266-0.400) |
| Russian Federation               | 0.516 (0.421-0.602) | 0.488 (0.438-0.537) | 0.466 (0.428-0.503) | 0.428 (0.388-0.469) | 0.360 (0.296-0.427) |
| Rwanda                           | 0.504 (0.359-0.649) | 0.520 (0.403-0.635) | 0.533 (0.436-0.628) | 0.547 (0.465-0.627) | 0.554 (0.460-0.644) |
| Saint Kitts and Nevis            | 0.534 (0.421-0.643) | 0.526 (0.445-0.606) | 0.490 (0.422-0.556) | 0.450 (0.385-0.513) | 0.404 (0.318-0.491) |
| Saint Lucia                      | 0.532 (0.421-0.638) | 0.528 (0.451-0.601) | 0.505 (0.443-0.568) | 0.472 (0.409-0.534) | 0.426 (0.338-0.515) |
| Saint Vincent and the Grenadines | 0.541 (0.422-0.658) | 0.536 (0.451-0.617) | 0.512 (0.442-0.580) | 0.467 (0.405-0.527) | 0.415 (0.338-0.494) |
| Samoa                            | 0.441 (0.327-0.562) | 0.407 (0.326-0.490) | 0.349 (0.285-0.416) | 0.296 (0.244-0.352) | 0.259 (0.196-0.329) |
| Sao Tome and Principe            | 0.561 (0.443-0.674) | 0.571 (0.482-0.655) | 0.581 (0.505-0.655) | 0.582 (0.518-0.645) | 0.565 (0.485-0.644) |
| Saudi Arabia                     | 0.467 (0.349-0.584) | 0.425 (0.357-0.489) | 0.381 (0.335-0.423) | 0.345 (0.304-0.384) | 0.304 (0.247-0.367) |
| Senegal                          | 0.497 (0.377-0.613) | 0.506 (0.421-0.594) | 0.513 (0.436-0.589) | 0.513 (0.447-0.579) | 0.508 (0.428-0.588) |
| Serbia                           | 0.507 (0.402-0.607) | 0.472 (0.406-0.538) | 0.445 (0.388-0.501) | 0.411 (0.362-0.459) | 0.374 (0.307-0.438) |
| Seychelles                       | 0.524 (0.417-0.631) | 0.528 (0.450-0.607) | 0.514 (0.444-0.584) | 0.489 (0.423-0.556) | 0.452 (0.367-0.538) |
| Sierra Leone                     | 0.516 (0.395-0.636) | 0.524 (0.431-0.614) | 0.528 (0.450-0.605) | 0.534 (0.469-0.599) | 0.542 (0.464-0.617) |
| Singapore                        | 0.587 (0.477-0.690) | 0.590 (0.531-0.646) | 0.576 (0.528-0.621) | 0.554 (0.509-0.597) | 0.521 (0.459-0.582) |
| Slovakia                         | 0.502 (0.396-0.600) | 0.462 (0.399-0.527) | 0.421 (0.370-0.474) | 0.384 (0.338-0.432) | 0.334 (0.268-0.402) |
| Slovenia                         | 0.505 (0.393-0.611) | 0.466 (0.399-0.534) | 0.428 (0.371-0.486) | 0.376 (0.326-0.429) | 0.334 (0.263-0.409) |
| Solomon Islands                  | 0.610 (0.464-0.735) | 0.591 (0.482-0.692) | 0.572 (0.480-0.660) | 0.560 (0.476-0.641) | 0.535 (0.438-0.629) |
| Somalia                          | 0.507 (0.371-0.642) | 0.512 (0.406-0.618) | 0.513 (0.420-0.606) | 0.519 (0.432-0.607) | 0.518 (0.413-0.619) |
| South Africa                     | 0.486 (0.379-0.592) | 0.490 (0.419-0.559) | 0.486 (0.428-0.544) | 0.468 (0.421-0.516) | 0.434 (0.369-0.499) |
| South Korea                      | 0.574 (0.477-0.664) | 0.598 (0.542-0.651) | 0.590 (0.543-0.637) | 0.572 (0.531-0.613) | 0.532 (0.471-0.590) |
| Spain                            | 0.510 (0.418-0.599) | 0.454 (0.401-0.507) | 0.396 (0.356-0.437) | 0.343 (0.306-0.380) | 0.311 (0.255-0.370) |
| Sri Lanka                        | 0.471 (0.362-0.583) | 0.484 (0.405-0.565) | 0.495 (0.427-0.563) | 0.509 (0.446-0.572) | 0.514 (0.422-0.602) |
| Sudan                            | 0.512 (0.387-0.638) | 0.520 (0.428-0.613) | 0.521 (0.438-0.602) | 0.519 (0.444-0.591) | 0.512 (0.421-0.600) |
| Suriname                         | 0.496 (0.388-0.607) | 0.482 (0.404-0.560) | 0.465 (0.397-0.534) | 0.434 (0.373-0.494) | 0.390 (0.314-0.467) |
| Swaziland                        | 0.499 (0.375-0.628) | 0.509 (0.414-0.603) | 0.512 (0.431-0.595) | 0.512 (0.436-0.587) | 0.505 (0.408-0.598) |
| Sweden                           | 0.521 (0.442-0.595) | 0.476 (0.431-0.521) | 0.432 (0.395-0.470) | 0.388 (0.353-0.423) | 0.350 (0.296-0.409) |
| Switzerland                      | 0.487 (0.394-0.581) | 0.445 (0.384-0.504) | 0.393 (0.349-0.439) | 0.361 (0.322-0.401) | 0.331 (0.276-0.391) |
| Syrian Arab Republic             | 0.507 (0.389-0.621) | 0.471 (0.399-0.546) | 0.457 (0.398-0.517) | 0.427 (0.378-0.476) | 0.397 (0.327-0.466) |
| Taiwan                           | 0.558 (0.462-0.653) | 0.561 (0.497-0.624) | 0.543 (0.488-0.599) | 0.507 (0.450-0.562) | 0.478 (0.397-0.559) |
| Tajikistan                       | 0.535 (0.411-0.655) | 0.534 (0.438-0.627) | 0.541 (0.456-0.624) | 0.548 (0.467-0.624) | 0.512 (0.412-0.605) |
| Tanzania                         | 0.526 (0.400-0.655) | 0.531 (0.442-0.624) | 0.533 (0.461-0.605) | 0.531 (0.469-0.592) | 0.533 (0.456-0.608) |
| Thailand                         | 0.478 (0.375-0.582) | 0.496 (0.425-0.563) | 0.512 (0.455-0.568) | 0.522 (0.471-0.571) | 0.506 (0.432-0.580) |
| Timor-Leste                      | 0.451 (0.339-0.570) | 0.454 (0.369-0.545) | 0.464 (0.390-0.543) | 0.477 (0.404-0.552) | 0.484 (0.394-0.577) |
| Togo                             | 0.537 (0.411-0.659) | 0.547 (0.455-0.640) | 0.549 (0.472-0.627) | 0.554 (0.487-0.622) | 0.553 (0.468-0.633) |
| Tokelau                          | 0.419 (0.266-0.579) | 0.388 (0.283-0.497) | 0.347 (0.271-0.428) | 0.303 (0.240-0.371) | 0.262 (0.186-0.349) |
| Tonga                            | 0.399 (0.285-0.520) | 0.362 (0.284-0.442) | 0.318 (0.253-0.385) | 0.275 (0.221-0.331) | 0.246 (0.183-0.316) |
| Trinidad and Tobago              | 0.506 (0.367-0.642) | 0.502 (0.399-0.602) | 0.504 (0.427-0.576) | 0.469 (0.393-0.542) | 0.409 (0.300-0.520) |
| Tunisia                          | 0.489 (0.376-0.602) | 0.467 (0.397-0.541) | 0.442 (0.387-0.498) | 0.409 (0.366-0.456) | 0.371 (0.309-0.433) |
| Turkey                           | 0.495 (0.390-0.595) | 0.468 (0.405-0.529) | 0.422 (0.376-0.468) | 0.376 (0.338-0.413) | 0.331 (0.279-0.385) |
| Turkmenistan                     | 0.533 (0.404-0.652) | 0.523 (0.430-0.615) | 0.502 (0.423-0.579) | 0.481 (0.411-0.551) | 0.419 (0.338-0.503) |
| Tuvalu                           | 0.445 (0.329-0.571) | 0.402 (0.323-0.487) | 0.339 (0.277-0.407) | 0.293 (0.240-0.351) | 0.261 (0.195-0.334) |
| Uganda                           | 0.536 (0.399-0.674) | 0.547 (0.442-0.651) | 0.554 (0.463-0.645) | 0.557 (0.478-0.637) | 0.562 (0.478-0.644) |
| Ukraine                          | 0.524 (0.418-0.623) | 0.491 (0.422-0.557) | 0.466 (0.407-0.526) | 0.447 (0.390-0.508) | 0.386 (0.311-0.464) |
| United Arab Emirates             | 0.383 (0.257-0.510) | 0.356 (0.282-0.432) | 0.328 (0.279-0.381) | 0.296 (0.253-0.340) | 0.285 (0.228-0.345) |
| United Kingdom                   | 0.474 (0.395-0.550) | 0.439 (0.394-0.483) | 0.394 (0.363-0.427) | 0.342 (0.315-0.368) | 0.297 (0.255-0.341) |
| United States of America         | 0.453 (0.378-0.528) | 0.410 (0.363-0.455) | 0.353 (0.315-0.391) | 0.293 (0.261-0.325) | 0.252 (0.208-0.300) |
| Uruguay                          | 0.507 (0.384-0.626) | 0.477 (0.397-0.560) | 0.440 (0.377-0.502) | 0.388 (0.335-0.443) | 0.335 (0.268-0.404) |
| Uzbekistan                       | 0.535 (0.400-0.664) | 0.527 (0.426-0.624) | 0.514 (0.429-0.594) | 0.506 (0.430-0.578) | 0.461 (0.371-0.552) |
| Vanuatu                          | 0.555 (0.410-0.684) | 0.549 (0.443-0.649) | 0.530 (0.438-0.616) | 0.504 (0.425-0.583) | 0.473 (0.379-0.565) |
| Venezuela                        | 0.523 (0.413-0.632) | 0.480 (0.406-0.553) | 0.441 (0.382-0.501) | 0.399 (0.351-0.446) | 0.345 (0.282-0.412) |
| Viet Nam                         | 0.418 (0.318-0.523) | 0.424 (0.360-0.491) | 0.436 (0.384-0.486) | 0.458 (0.410-0.504) | 0.480 (0.407-0.549) |
| Yemen                            | 0.521 (0.392-0.645) | 0.528 (0.437-0.617) | 0.525 (0.452-0.596) | 0.516 (0.451-0.581) | 0.499 (0.414-0.584) |
| Zambia                           | 0.490 (0.376-0.606) | 0.496 (0.408-0.585) | 0.502 (0.424-0.580) | 0.509 (0.441-0.577) | 0.514 (0.430-0.598) |
| Zimbabwe                         | 0.492 (0.376-0.609) | 0.504 (0.422-0.587) | 0.509 (0.440-0.581) | 0.514 (0.448-0.578) | 0.513 (0.430-0.595) |

**Women, 20 ≤ BMI < 25 kg/m<sup>2</sup>**

| Country                  | Year                |                     |                     |                     |                     |
|--------------------------|---------------------|---------------------|---------------------|---------------------|---------------------|
|                          | 1975                | 1985                | 1995                | 2005                | 2014                |
| Afghanistan              | 0.399 (0.285-0.521) | 0.419 (0.331-0.514) | 0.435 (0.361-0.514) | 0.444 (0.375-0.514) | 0.440 (0.361-0.522) |
| Albania                  | 0.487 (0.367-0.604) | 0.481 (0.402-0.561) | 0.482 (0.418-0.545) | 0.463 (0.407-0.518) | 0.445 (0.369-0.522) |
| Algeria                  | 0.412 (0.296-0.530) | 0.389 (0.317-0.466) | 0.364 (0.313-0.416) | 0.329 (0.287-0.373) | 0.301 (0.242-0.362) |
| American Samoa           | 0.223 (0.157-0.298) | 0.198 (0.152-0.247) | 0.173 (0.134-0.214) | 0.155 (0.118-0.196) | 0.145 (0.099-0.198) |
| Andorra                  | 0.451 (0.357-0.546) | 0.427 (0.361-0.492) | 0.407 (0.354-0.462) | 0.374 (0.325-0.423) | 0.360 (0.291-0.431) |
| Angola                   | 0.458 (0.329-0.590) | 0.465 (0.366-0.565) | 0.463 (0.379-0.546) | 0.442 (0.363-0.522) | 0.412 (0.318-0.507) |
| Antigua and Barbuda      | 0.436 (0.325-0.548) | 0.403 (0.327-0.482) | 0.359 (0.298-0.422) | 0.320 (0.261-0.383) | 0.281 (0.202-0.369) |
| Argentina                | 0.474 (0.369-0.575) | 0.451 (0.376-0.523) | 0.418 (0.360-0.476) | 0.386 (0.338-0.437) | 0.347 (0.283-0.416) |
| Armenia                  | 0.481 (0.338-0.617) | 0.461 (0.365-0.559) | 0.450 (0.379-0.525) | 0.418 (0.358-0.479) | 0.385 (0.307-0.465) |
| Australia                | 0.526 (0.457-0.597) | 0.497 (0.454-0.540) | 0.452 (0.416-0.487) | 0.398 (0.365-0.432) | 0.354 (0.301-0.407) |
| Austria                  | 0.537 (0.456-0.617) | 0.521 (0.469-0.573) | 0.496 (0.452-0.543) | 0.462 (0.418-0.505) | 0.434 (0.368-0.502) |
| Azerbaijan               | 0.455 (0.324-0.576) | 0.438 (0.348-0.525) | 0.434 (0.364-0.504) | 0.408 (0.348-0.471) | 0.352 (0.274-0.433) |
| Bahamas                  | 0.388 (0.289-0.491) | 0.354 (0.284-0.422) | 0.320 (0.266-0.379) | 0.287 (0.237-0.340) | 0.267 (0.206-0.334) |
| Bahrain                  | 0.305 (0.213-0.404) | 0.304 (0.243-0.367) | 0.283 (0.240-0.329) | 0.259 (0.223-0.298) | 0.240 (0.189-0.296) |
| Bangladesh               | 0.355 (0.259-0.457) | 0.368 (0.299-0.438) | 0.376 (0.323-0.430) | 0.384 (0.326-0.433) | 0.387 (0.319-0.457) |
| Barbados                 | 0.445 (0.338-0.555) | 0.422 (0.346-0.498) | 0.389 (0.330-0.448) | 0.341 (0.287-0.398) | 0.302 (0.227-0.383) |
| Belarus                  | 0.475 (0.359-0.584) | 0.450 (0.376-0.524) | 0.432 (0.374-0.490) | 0.414 (0.358-0.468) | 0.393 (0.319-0.468) |
| Belgium                  | 0.515 (0.428-0.601) | 0.493 (0.441-0.544) | 0.464 (0.425-0.503) | 0.434 (0.393-0.473) | 0.413 (0.352-0.475) |
| Belize                   | 0.472 (0.350-0.592) | 0.448 (0.369-0.526) | 0.408 (0.350-0.468) | 0.364 (0.312-0.417) | 0.328 (0.256-0.404) |
| Benin                    | 0.516 (0.403-0.629) | 0.519 (0.444-0.594) | 0.502 (0.444-0.557) | 0.472 (0.425-0.518) | 0.435 (0.374-0.497) |
| Bermuda                  | 0.331 (0.232-0.437) | 0.308 (0.237-0.384) | 0.284 (0.226-0.347) | 0.257 (0.206-0.309) | 0.230 (0.169-0.298) |
| Bhutan                   | 0.428 (0.307-0.550) | 0.446 (0.355-0.537) | 0.455 (0.382-0.529) | 0.458 (0.395-0.522) | 0.449 (0.373-0.527) |
| Bolivia                  | 0.535 (0.413-0.648) | 0.512 (0.425-0.594) | 0.469 (0.400-0.535) | 0.419 (0.363-0.476) | 0.374 (0.301-0.449) |
| Bosnia and Herzegovina   | 0.530 (0.378-0.669) | 0.521 (0.421-0.616) | 0.499 (0.424-0.571) | 0.446 (0.383-0.507) | 0.451 (0.379-0.525) |
| Botswana                 | 0.483 (0.349-0.616) | 0.454 (0.360-0.548) | 0.403 (0.334-0.472) | 0.356 (0.300-0.414) | 0.312 (0.246-0.381) |
| Brazil                   | 0.484 (0.379-0.582) | 0.459 (0.395-0.525) | 0.434 (0.387-0.481) | 0.407 (0.367-0.448) | 0.374 (0.312-0.436) |
| Brunei Darussalam        | 0.392 (0.236-0.550) | 0.407 (0.293-0.519) | 0.416 (0.338-0.496) | 0.407 (0.340-0.474) | 0.399 (0.314-0.492) |
| Bulgaria                 | 0.464 (0.356-0.569) | 0.452 (0.382-0.520) | 0.445 (0.391-0.503) | 0.427 (0.373-0.481) | 0.410 (0.333-0.487) |
| Burkina Faso             | 0.489 (0.373-0.606) | 0.496 (0.417-0.577) | 0.492 (0.430-0.551) | 0.472 (0.418-0.523) | 0.442 (0.376-0.508) |
| Burundi                  | 0.487 (0.360-0.617) | 0.497 (0.395-0.602) | 0.502 (0.417-0.587) | 0.498 (0.426-0.570) | 0.481 (0.402-0.560) |
| Cabo Verde               | 0.519 (0.395-0.640) | 0.517 (0.436-0.596) | 0.500 (0.436-0.563) | 0.456 (0.403-0.511) | 0.413 (0.343-0.484) |
| Cambodia                 | 0.415 (0.299-0.538) | 0.434 (0.358-0.516) | 0.454 (0.393-0.519) | 0.471 (0.416-0.526) | 0.478 (0.408-0.548) |
| Cameroon                 | 0.535 (0.425-0.642) | 0.530 (0.458-0.600) | 0.516 (0.464-0.567) | 0.480 (0.436-0.523) | 0.435 (0.372-0.496) |
| Canada                   | 0.532 (0.458-0.603) | 0.487 (0.441-0.534) | 0.435 (0.393-0.475) | 0.382 (0.345-0.421) | 0.346 (0.292-0.403) |
| Central African Republic | 0.494 (0.364-0.623) | 0.497 (0.396-0.596) | 0.485 (0.403-0.566) | 0.468 (0.395-0.541) | 0.445 (0.355-0.537) |
| Chad                     | 0.481 (0.369-0.600) | 0.491 (0.412-0.573) | 0.484 (0.421-0.547) | 0.462 (0.407-0.518) | 0.428 (0.355-0.499) |
| Chile                    | 0.474 (0.359-0.585) | 0.437 (0.359-0.516) | 0.395 (0.339-0.450) | 0.356 (0.310-0.404) | 0.322 (0.262-0.385) |
| China                    | 0.553 (0.452-0.646) | 0.555 (0.505-0.601) | 0.547 (0.515-0.578) | 0.531 (0.496-0.566) | 0.504 (0.439-0.564) |
| China (Hong Kong SAR)    | 0.513 (0.374-0.642) | 0.508 (0.418-0.593) | 0.501 (0.435-0.566) | 0.502 (0.434-0.570) | 0.501 (0.402-0.594) |
| Colombia                 | 0.478 (0.363-0.590) | 0.447 (0.373-0.520) | 0.411 (0.359-0.463) | 0.377 (0.336-0.418) | 0.345 (0.285-0.408) |
| Comoros                  | 0.517 (0.400-0.630) | 0.516 (0.433-0.594) | 0.506 (0.441-0.568) | 0.485 (0.430-0.540) | 0.456 (0.388-0.525) |
| Congo                    | 0.473 (0.361-0.583) | 0.462 (0.381-0.540) | 0.447 (0.380-0.512) | 0.425 (0.362-0.486) | 0.397 (0.317-0.478) |
| Cook Islands             | 0.291 (0.202-0.393) | 0.234 (0.179-0.291) | 0.188 (0.145-0.234) | 0.157 (0.120-0.197) | 0.140 (0.098-0.189) |
| Costa Rica               | 0.479 (0.360-0.595) | 0.455 (0.376-0.533) | 0.411 (0.353-0.467) | 0.361 (0.315-0.408) | 0.321 (0.261-0.382) |
| Cote d'Ivoire            | 0.517 (0.407-0.624) | 0.515 (0.441-0.586) | 0.500 (0.446-0.555) | 0.473 (0.427-0.519) | 0.439 (0.376-0.502) |
| Croatia                  | 0.486 (0.371-0.595) | 0.466 (0.393-0.541) | 0.452 (0.394-0.510) | 0.435 (0.380-0.489) | 0.424 (0.350-0.503) |
| Cuba                     | 0.415 (0.311-0.521) | 0.378 (0.309-0.448) | 0.353 (0.298-0.410) | 0.322 (0.279-0.374) | 0.290 (0.226-0.360) |
| Cyprus                   | 0.549 (0.446-0.645) | 0.492 (0.425-0.559) | 0.444 (0.390-0.498) | 0.406 (0.353-0.459) | 0.381 (0.310-0.458) |
| Czech Republic           | 0.437 (0.334-0.535) | 0.419 (0.354-0.481) | 0.415 (0.364-0.466) | 0.409 (0.360-0.460) | 0.404 (0.333-0.479) |
| Denmark                  | 0.525 (0.442-0.601) | 0.499 (0.446-0.550) | 0.478 (0.433-0.522) | 0.461 (0.415-0.506) | 0.439 (0.375-0.502) |
| Djibouti                 | 0.508 (0.377-0.631) | 0.505 (0.393-0.610) | 0.473 (0.392-0.551) | 0.444 (0.369-0.519) | 0.412 (0.319-0.506) |
| Dominica                 | 0.450 (0.342-0.560) | 0.430 (0.355-0.505) | 0.386 (0.328-0.446) | 0.351 (0.299-0.405) | 0.310 (0.245-0.379) |
| Dominican Republic       | 0.469 (0.358-0.577) | 0.439 (0.365-0.511) | 0.406 (0.351-0.461) | 0.356 (0.309-0.405) | 0.316 (0.248-0.385) |
| DR Congo                 | 0.478 (0.359-0.599) | 0.485 (0.392-0.575) | 0.483 (0.403-0.557) | 0.470 (0.399-0.540) | 0.445 (0.358-0.531) |
| Ecuador                  | 0.533 (0.410-0.646) | 0.497 (0.412-0.580) | 0.452 (0.385-0.519) | 0.410 (0.353-0.468) | 0.370 (0.298-0.444) |
| Egypt                    | 0.447 (0.331-0.568) | 0.399 (0.332-0.470) | 0.355 (0.310-0.401) | 0.306 (0.269-0.343) | 0.263 (0.212-0.317) |
| El Salvador              | 0.473 (0.352-0.590) | 0.454 (0.373-0.534) | 0.414 (0.356-0.473) | 0.367 (0.321-0.413) | 0.333 (0.272-0.398) |
| Equatorial Guinea        | 0.502 (0.369-0.636) | 0.500 (0.403-0.599) | 0.488 (0.406-0.569) | 0.414 (0.334-0.493) | 0.373 (0.270-0.479) |
| Eritrea                  | 0.453 (0.338-0.568) | 0.457 (0.378-0.537) | 0.452 (0.389-0.515) | 0.437 (0.383-0.495) | 0.416 (0.343-0.489) |
| Estonia                  | 0.432 (0.324-0.533) | 0.421 (0.356-0.484) | 0.424 (0.375-0.472) | 0.422 (0.379-0.464) | 0.424 (0.357-0.489) |
| Ethiopia                 | 0.473 (0.353-0.595) | 0.478 (0.393-0.563) | 0.475 (0.409-0.543) | 0.460 (0.401-0.516) | 0.436 (0.363-0.508) |
| Fiji                     | 0.410 (0.272-0.550) | 0.378 (0.275-0.484) | 0.341 (0.260-0.428) | 0.300 (0.232-0.373) | 0.273 (0.201-0.353) |
| Finland                  | 0.563 (0.483-0.637) | 0.530 (0.482-0.576) | 0.488 (0.449-0.527) | 0.449 (0.411-0.488) | 0.428 (0.372-0.486) |
| France                   | 0.514 (0.422-0.601) | 0.493 (0.433-0.552) | 0.463 (0.413-0.513) | 0.429 (0.383-0.478) | 0.398 (0.332-0.467) |
| French Polynesia         | 0.235 (0.154-0.332) | 0.205 (0.148-0.271) | 0.182 (0.136-0.235) | 0.166 (0.125-0.211) | 0.153 (0.108-0.207) |
| Gabon                    | 0.473 (0.339-0.601) | 0.466 (0.372-0.558) | 0.446 (0.371-0.519) | 0.407 (0.340-0.474) | 0.379 (0.297-0.465) |
| Gambia                   | 0.499 (0.384-0.615) | 0.499 (0.422-0.576) | 0.487 (0.426-0.548) | 0.456 (0.404-0.508) | 0.417 (0.348-0.488) |
| Georgia                  | 0.465 (0.334-0.593) | 0.433 (0.343-0.523) | 0.438 (0.362-0.511) | 0.412 (0.349-0.474) | 0.376 (0.297-0.454) |

|                                  |                     |                     |                     |                     |                     |
|----------------------------------|---------------------|---------------------|---------------------|---------------------|---------------------|
| Germany                          | 0.549 (0.472-0.621) | 0.524 (0.481-0.566) | 0.491 (0.456-0.526) | 0.456 (0.419-0.494) | 0.431 (0.373-0.492) |
| Ghana                            | 0.525 (0.417-0.630) | 0.524 (0.451-0.593) | 0.502 (0.447-0.555) | 0.464 (0.413-0.514) | 0.415 (0.351-0.482) |
| Greece                           | 0.499 (0.407-0.591) | 0.467 (0.407-0.528) | 0.439 (0.388-0.490) | 0.404 (0.356-0.453) | 0.384 (0.316-0.453) |
| Greenland                        | 0.522 (0.438-0.603) | 0.493 (0.436-0.548) | 0.466 (0.422-0.512) | 0.434 (0.392-0.477) | 0.408 (0.344-0.472) |
| Grenada                          | 0.472 (0.361-0.584) | 0.444 (0.366-0.521) | 0.402 (0.340-0.461) | 0.354 (0.299-0.408) | 0.310 (0.240-0.386) |
| Guatemala                        | 0.491 (0.368-0.609) | 0.467 (0.386-0.547) | 0.435 (0.377-0.494) | 0.393 (0.343-0.440) | 0.356 (0.288-0.425) |
| Guinea                           | 0.519 (0.400-0.640) | 0.517 (0.437-0.597) | 0.503 (0.441-0.564) | 0.479 (0.429-0.530) | 0.449 (0.384-0.512) |
| Guinea Bissau                    | 0.509 (0.394-0.622) | 0.510 (0.427-0.590) | 0.497 (0.430-0.562) | 0.473 (0.415-0.527) | 0.443 (0.371-0.512) |
| Guyana                           | 0.447 (0.332-0.563) | 0.428 (0.348-0.506) | 0.396 (0.333-0.460) | 0.346 (0.289-0.406) | 0.302 (0.231-0.378) |
| Haiti                            | 0.460 (0.343-0.579) | 0.455 (0.370-0.536) | 0.440 (0.372-0.504) | 0.414 (0.351-0.474) | 0.381 (0.297-0.466) |
| Honduras                         | 0.501 (0.381-0.618) | 0.479 (0.399-0.559) | 0.445 (0.387-0.504) | 0.403 (0.354-0.451) | 0.357 (0.290-0.423) |
| Hungary                          | 0.451 (0.353-0.546) | 0.439 (0.376-0.502) | 0.442 (0.388-0.495) | 0.429 (0.377-0.478) | 0.417 (0.345-0.493) |
| Iceland                          | 0.548 (0.457-0.632) | 0.508 (0.445-0.569) | 0.481 (0.430-0.531) | 0.454 (0.402-0.505) | 0.435 (0.364-0.505) |
| India                            | 0.356 (0.263-0.446) | 0.375 (0.314-0.435) | 0.385 (0.344-0.427) | 0.391 (0.355-0.429) | 0.391 (0.332-0.453) |
| Indonesia                        | 0.412 (0.313-0.513) | 0.432 (0.367-0.500) | 0.448 (0.399-0.500) | 0.455 (0.413-0.500) | 0.450 (0.384-0.516) |
| Iran                             | 0.397 (0.284-0.511) | 0.380 (0.316-0.448) | 0.357 (0.317-0.400) | 0.322 (0.293-0.352) | 0.287 (0.237-0.339) |
| Iraq                             | 0.404 (0.297-0.519) | 0.373 (0.305-0.447) | 0.355 (0.304-0.409) | 0.323 (0.279-0.368) | 0.288 (0.229-0.351) |
| Ireland                          | 0.586 (0.502-0.668) | 0.559 (0.500-0.618) | 0.507 (0.457-0.556) | 0.443 (0.396-0.490) | 0.388 (0.325-0.453) |
| Israel                           | 0.471 (0.367-0.569) | 0.438 (0.372-0.503) | 0.402 (0.351-0.456) | 0.379 (0.330-0.430) | 0.358 (0.291-0.430) |
| Italy                            | 0.506 (0.420-0.591) | 0.484 (0.433-0.533) | 0.455 (0.416-0.495) | 0.423 (0.382-0.463) | 0.395 (0.330-0.460) |
| Jamaica                          | 0.425 (0.323-0.532) | 0.409 (0.341-0.477) | 0.369 (0.318-0.419) | 0.329 (0.283-0.376) | 0.290 (0.227-0.355) |
| Japan                            | 0.566 (0.512-0.617) | 0.570 (0.537-0.602) | 0.568 (0.539-0.597) | 0.558 (0.526-0.590) | 0.542 (0.485-0.598) |
| Jordan                           | 0.432 (0.315-0.553) | 0.371 (0.307-0.438) | 0.331 (0.284-0.378) | 0.292 (0.254-0.330) | 0.258 (0.207-0.314) |
| Kazakhstan                       | 0.459 (0.328-0.580) | 0.442 (0.352-0.530) | 0.422 (0.353-0.493) | 0.395 (0.332-0.457) | 0.367 (0.284-0.453) |
| Kenya                            | 0.494 (0.379-0.608) | 0.502 (0.424-0.579) | 0.499 (0.437-0.559) | 0.477 (0.422-0.531) | 0.443 (0.370-0.515) |
| Kiribati                         | 0.309 (0.211-0.417) | 0.288 (0.220-0.363) | 0.254 (0.199-0.316) | 0.211 (0.165-0.263) | 0.188 (0.134-0.251) |
| Kuwait                           | 0.278 (0.184-0.385) | 0.284 (0.226-0.347) | 0.266 (0.225-0.310) | 0.244 (0.208-0.281) | 0.226 (0.177-0.279) |
| Kyrgyzstan                       | 0.503 (0.366-0.634) | 0.493 (0.398-0.583) | 0.477 (0.406-0.547) | 0.457 (0.394-0.516) | 0.420 (0.339-0.498) |
| Lao PDR                          | 0.410 (0.303-0.524) | 0.437 (0.357-0.517) | 0.460 (0.394-0.526) | 0.476 (0.419-0.533) | 0.480 (0.406-0.550) |
| Latvia                           | 0.430 (0.319-0.539) | 0.407 (0.339-0.475) | 0.407 (0.352-0.465) | 0.399 (0.348-0.451) | 0.396 (0.320-0.472) |
| Lebanon                          | 0.400 (0.296-0.508) | 0.369 (0.302-0.442) | 0.340 (0.285-0.398) | 0.303 (0.252-0.358) | 0.275 (0.219-0.334) |
| Lesotho                          | 0.506 (0.366-0.638) | 0.489 (0.395-0.580) | 0.449 (0.379-0.520) | 0.395 (0.337-0.455) | 0.342 (0.273-0.414) |
| Liberia                          | 0.521 (0.408-0.631) | 0.521 (0.442-0.598) | 0.529 (0.450-0.603) | 0.499 (0.442-0.554) | 0.455 (0.383-0.524) |
| Libya                            | 0.348 (0.230-0.472) | 0.323 (0.259-0.390) | 0.308 (0.263-0.354) | 0.285 (0.248-0.323) | 0.265 (0.213-0.321) |
| Lithuania                        | 0.433 (0.323-0.539) | 0.406 (0.338-0.471) | 0.399 (0.349-0.452) | 0.391 (0.343-0.440) | 0.377 (0.307-0.451) |
| Luxembourg                       | 0.553 (0.470-0.633) | 0.538 (0.477-0.597) | 0.508 (0.447-0.565) | 0.461 (0.412-0.510) | 0.435 (0.368-0.502) |
| Macedonia (TFYR)                 | 0.460 (0.346-0.567) | 0.450 (0.377-0.522) | 0.441 (0.383-0.499) | 0.439 (0.385-0.494) | 0.430 (0.354-0.506) |
| Madagascar                       | 0.465 (0.354-0.581) | 0.475 (0.399-0.554) | 0.473 (0.412-0.534) | 0.455 (0.402-0.510) | 0.427 (0.352-0.501) |
| Malawi                           | 0.512 (0.389-0.633) | 0.517 (0.434-0.597) | 0.513 (0.452-0.573) | 0.497 (0.446-0.549) | 0.470 (0.397-0.540) |
| Malaysia                         | 0.434 (0.326-0.541) | 0.456 (0.382-0.531) | 0.465 (0.406-0.521) | 0.450 (0.403-0.495) | 0.421 (0.354-0.491) |
| Maldives                         | 0.459 (0.345-0.574) | 0.476 (0.394-0.556) | 0.489 (0.418-0.558) | 0.486 (0.414-0.553) | 0.470 (0.392-0.548) |
| Mali                             | 0.504 (0.387-0.619) | 0.506 (0.426-0.584) | 0.493 (0.430-0.554) | 0.469 (0.416-0.520) | 0.439 (0.369-0.509) |
| Malta                            | 0.502 (0.370-0.623) | 0.455 (0.383-0.525) | 0.420 (0.365-0.474) | 0.381 (0.330-0.434) | 0.356 (0.286-0.432) |
| Marshall Islands                 | 0.289 (0.198-0.393) | 0.255 (0.193-0.322) | 0.214 (0.167-0.263) | 0.191 (0.149-0.239) | 0.174 (0.121-0.235) |
| Mauritania                       | 0.502 (0.381-0.619) | 0.509 (0.424-0.590) | 0.492 (0.426-0.559) | 0.463 (0.404-0.522) | 0.425 (0.350-0.500) |
| Mauritius                        | 0.507 (0.394-0.614) | 0.492 (0.421-0.563) | 0.462 (0.403-0.520) | 0.419 (0.363-0.475) | 0.369 (0.291-0.449) |
| Mexico                           | 0.442 (0.331-0.550) | 0.406 (0.337-0.475) | 0.368 (0.322-0.417) | 0.329 (0.292-0.366) | 0.297 (0.243-0.354) |
| Micronesia (Federated States of) | 0.325 (0.224-0.439) | 0.293 (0.227-0.369) | 0.257 (0.205-0.314) | 0.221 (0.178-0.266) | 0.191 (0.141-0.247) |
| Moldova                          | 0.480 (0.359-0.592) | 0.458 (0.383-0.531) | 0.454 (0.395-0.513) | 0.450 (0.393-0.506) | 0.434 (0.358-0.510) |
| Mongolia                         | 0.521 (0.384-0.649) | 0.500 (0.408-0.591) | 0.481 (0.410-0.551) | 0.457 (0.397-0.517) | 0.414 (0.336-0.490) |
| Montenegro                       | 0.461 (0.332-0.586) | 0.442 (0.359-0.525) | 0.440 (0.380-0.502) | 0.440 (0.385-0.496) | 0.431 (0.354-0.507) |
| Morocco                          | 0.450 (0.328-0.572) | 0.425 (0.349-0.503) | 0.393 (0.341-0.447) | 0.357 (0.312-0.403) | 0.319 (0.257-0.385) |
| Mozambique                       | 0.521 (0.389-0.646) | 0.527 (0.434-0.616) | 0.519 (0.449-0.586) | 0.494 (0.437-0.549) | 0.462 (0.390-0.532) |
| Myanmar                          | 0.437 (0.302-0.583) | 0.454 (0.360-0.551) | 0.470 (0.401-0.542) | 0.477 (0.420-0.534) | 0.479 (0.412-0.548) |
| Namibia                          | 0.446 (0.314-0.580) | 0.437 (0.349-0.528) | 0.410 (0.346-0.477) | 0.369 (0.319-0.423) | 0.330 (0.268-0.397) |
| Nauru                            | 0.161 (0.105-0.228) | 0.147 (0.107-0.191) | 0.149 (0.113-0.189) | 0.158 (0.117-0.202) | 0.153 (0.102-0.216) |
| Nepal                            | 0.389 (0.284-0.500) | 0.408 (0.331-0.488) | 0.423 (0.363-0.485) | 0.435 (0.383-0.488) | 0.439 (0.369-0.508) |
| Netherlands                      | 0.545 (0.461-0.623) | 0.526 (0.474-0.576) | 0.495 (0.455-0.535) | 0.457 (0.419-0.494) | 0.429 (0.368-0.491) |
| New Zealand                      | 0.534 (0.454-0.611) | 0.502 (0.452-0.553) | 0.452 (0.412-0.492) | 0.387 (0.350-0.422) | 0.344 (0.293-0.394) |
| Nicaragua                        | 0.480 (0.366-0.591) | 0.464 (0.388-0.541) | 0.437 (0.380-0.495) | 0.391 (0.345-0.439) | 0.351 (0.285-0.421) |
| Niger                            | 0.477 (0.364-0.595) | 0.485 (0.407-0.566) | 0.482 (0.420-0.545) | 0.470 (0.415-0.525) | 0.450 (0.379-0.519) |
| Nigeria                          | 0.484 (0.373-0.597) | 0.492 (0.423-0.562) | 0.482 (0.433-0.532) | 0.454 (0.411-0.496) | 0.409 (0.349-0.469) |
| Niue                             | 0.322 (0.217-0.442) | 0.261 (0.193-0.335) | 0.215 (0.166-0.267) | 0.178 (0.139-0.221) | 0.149 (0.104-0.199) |
| North Korea                      | 0.534 (0.407-0.649) | 0.535 (0.449-0.616) | 0.536 (0.461-0.607) | 0.528 (0.443-0.607) | 0.515 (0.404-0.620) |
| Norway                           | 0.521 (0.442-0.600) | 0.490 (0.438-0.542) | 0.452 (0.409-0.495) | 0.416 (0.376-0.457) | 0.399 (0.337-0.463) |
| Occupied Palestinian Territory   | 0.434 (0.321-0.552) | 0.404 (0.328-0.484) | 0.374 (0.316-0.432) | 0.327 (0.280-0.374) | 0.293 (0.228-0.362) |
| Oman                             | 0.388 (0.263-0.512) | 0.358 (0.288-0.433) | 0.317 (0.272-0.364) | 0.286 (0.249-0.327) | 0.258 (0.205-0.317) |
| Pakistan                         | 0.412 (0.303-0.519) | 0.426 (0.350-0.504) | 0.436 (0.378-0.497) | 0.441 (0.388-0.497) | 0.438 (0.367-0.512) |
| Palau                            | 0.207 (0.132-0.294) | 0.199 (0.149-0.254) | 0.179 (0.138-0.224) | 0.161 (0.123-0.202) | 0.150 (0.105-0.201) |
| Panama                           | 0.461 (0.346-0.575) | 0.431 (0.354-0.509) | 0.395 (0.339-0.454) | 0.347 (0.301-0.395) | 0.301 (0.238-0.365) |
| Papua New Guinea                 | 0.480 (0.326-0.628) | 0.468 (0.353-0.577) | 0.436 (0.345-0.524) | 0.402 (0.324-0.478) | 0.360 (0.271-0.452) |

|                                  |                     |                     |                     |                     |                     |
|----------------------------------|---------------------|---------------------|---------------------|---------------------|---------------------|
| Paraguay                         | 0.536 (0.422-0.643) | 0.513 (0.435-0.590) | 0.481 (0.419-0.542) | 0.448 (0.391-0.504) | 0.404 (0.330-0.477) |
| Peru                             | 0.508 (0.391-0.624) | 0.474 (0.391-0.558) | 0.442 (0.379-0.506) | 0.394 (0.346-0.443) | 0.341 (0.280-0.400) |
| Philippines                      | 0.414 (0.317-0.508) | 0.439 (0.379-0.498) | 0.456 (0.409-0.503) | 0.461 (0.417-0.507) | 0.455 (0.386-0.525) |
| Poland                           | 0.456 (0.354-0.552) | 0.445 (0.383-0.503) | 0.433 (0.386-0.482) | 0.412 (0.364-0.458) | 0.397 (0.329-0.467) |
| Portugal                         | 0.542 (0.439-0.640) | 0.522 (0.454-0.586) | 0.489 (0.436-0.541) | 0.458 (0.410-0.507) | 0.429 (0.361-0.502) |
| Puerto Rico                      | 0.398 (0.294-0.502) | 0.352 (0.284-0.422) | 0.300 (0.247-0.356) | 0.268 (0.221-0.315) | 0.248 (0.191-0.309) |
| Qatar                            | 0.338 (0.236-0.447) | 0.261 (0.197-0.333) | 0.254 (0.209-0.301) | 0.225 (0.187-0.265) | 0.207 (0.158-0.263) |
| Romania                          | 0.462 (0.352-0.569) | 0.447 (0.379-0.516) | 0.439 (0.386-0.493) | 0.426 (0.374-0.477) | 0.413 (0.338-0.490) |
| Russian Federation               | 0.407 (0.311-0.502) | 0.387 (0.334-0.440) | 0.384 (0.346-0.421) | 0.379 (0.338-0.421) | 0.373 (0.305-0.442) |
| Rwanda                           | 0.523 (0.393-0.648) | 0.532 (0.433-0.628) | 0.536 (0.461-0.611) | 0.524 (0.459-0.586) | 0.495 (0.419-0.569) |
| Saint Kitts and Nevis            | 0.457 (0.343-0.569) | 0.419 (0.341-0.499) | 0.376 (0.316-0.439) | 0.336 (0.279-0.394) | 0.296 (0.221-0.379) |
| Saint Lucia                      | 0.473 (0.364-0.582) | 0.452 (0.379-0.526) | 0.412 (0.355-0.472) | 0.374 (0.316-0.433) | 0.322 (0.240-0.407) |
| Saint Vincent and the Grenadines | 0.464 (0.347-0.581) | 0.439 (0.360-0.517) | 0.398 (0.340-0.458) | 0.354 (0.301-0.406) | 0.321 (0.252-0.396) |
| Samoa                            | 0.326 (0.221-0.440) | 0.290 (0.222-0.367) | 0.245 (0.193-0.301) | 0.196 (0.155-0.241) | 0.164 (0.118-0.216) |
| Sao Tome and Principe            | 0.510 (0.393-0.621) | 0.509 (0.428-0.585) | 0.490 (0.426-0.552) | 0.462 (0.387-0.515) | 0.412 (0.338-0.492) |
| Saudi Arabia                     | 0.347 (0.234-0.470) | 0.317 (0.256-0.383) | 0.294 (0.255-0.335) | 0.270 (0.236-0.305) | 0.240 (0.192-0.292) |
| Senegal                          | 0.495 (0.385-0.604) | 0.490 (0.417-0.563) | 0.475 (0.417-0.533) | 0.449 (0.399-0.500) | 0.415 (0.347-0.482) |
| Serbia                           | 0.477 (0.368-0.584) | 0.467 (0.397-0.534) | 0.457 (0.405-0.510) | 0.454 (0.406-0.502) | 0.439 (0.369-0.507) |
| Seychelles                       | 0.496 (0.383-0.604) | 0.466 (0.388-0.544) | 0.427 (0.363-0.491) | 0.378 (0.318-0.438) | 0.327 (0.254-0.405) |
| Sierra Leone                     | 0.512 (0.398-0.621) | 0.509 (0.431-0.587) | 0.497 (0.434-0.557) | 0.474 (0.422-0.525) | 0.438 (0.374-0.501) |
| Singapore                        | 0.558 (0.452-0.658) | 0.547 (0.487-0.605) | 0.535 (0.488-0.583) | 0.528 (0.482-0.572) | 0.513 (0.449-0.575) |
| Slovakia                         | 0.492 (0.384-0.594) | 0.471 (0.404-0.533) | 0.453 (0.401-0.504) | 0.435 (0.387-0.484) | 0.412 (0.338-0.486) |
| Slovenia                         | 0.476 (0.363-0.587) | 0.464 (0.390-0.536) | 0.446 (0.390-0.504) | 0.429 (0.376-0.484) | 0.417 (0.338-0.493) |
| Solomon Islands                  | 0.501 (0.345-0.650) | 0.474 (0.358-0.585) | 0.437 (0.345-0.526) | 0.401 (0.325-0.477) | 0.364 (0.279-0.452) |
| Somalia                          | 0.515 (0.387-0.637) | 0.514 (0.419-0.608) | 0.504 (0.424-0.582) | 0.490 (0.415-0.563) | 0.462 (0.372-0.550) |
| South Africa                     | 0.423 (0.307-0.538) | 0.393 (0.318-0.469) | 0.359 (0.305-0.414) | 0.312 (0.272-0.354) | 0.274 (0.223-0.328) |
| South Korea                      | 0.546 (0.454-0.636) | 0.571 (0.514-0.626) | 0.563 (0.515-0.611) | 0.557 (0.515-0.597) | 0.535 (0.470-0.596) |
| Spain                            | 0.520 (0.426-0.606) | 0.491 (0.434-0.544) | 0.454 (0.412-0.497) | 0.418 (0.377-0.458) | 0.390 (0.325-0.455) |
| Sri Lanka                        | 0.427 (0.318-0.539) | 0.449 (0.373-0.527) | 0.464 (0.403-0.525) | 0.470 (0.415-0.525) | 0.457 (0.375-0.540) |
| Sudan                            | 0.513 (0.395-0.629) | 0.516 (0.434-0.598) | 0.502 (0.434-0.568) | 0.479 (0.419-0.537) | 0.449 (0.375-0.526) |
| Suriname                         | 0.405 (0.298-0.512) | 0.371 (0.298-0.445) | 0.354 (0.294-0.415) | 0.326 (0.274-0.382) | 0.291 (0.225-0.363) |
| Swaziland                        | 0.489 (0.353-0.622) | 0.473 (0.381-0.565) | 0.428 (0.359-0.499) | 0.383 (0.325-0.442) | 0.337 (0.263-0.414) |
| Sweden                           | 0.531 (0.450-0.610) | 0.510 (0.461-0.559) | 0.484 (0.445-0.523) | 0.452 (0.413-0.492) | 0.426 (0.365-0.488) |
| Switzerland                      | 0.520 (0.427-0.610) | 0.506 (0.446-0.566) | 0.471 (0.425-0.517) | 0.445 (0.402-0.489) | 0.427 (0.363-0.491) |
| Syrian Arab Republic             | 0.445 (0.327-0.566) | 0.413 (0.339-0.489) | 0.386 (0.332-0.439) | 0.350 (0.305-0.397) | 0.316 (0.254-0.380) |
| Taiwan                           | 0.514 (0.408-0.615) | 0.521 (0.453-0.589) | 0.518 (0.464-0.572) | 0.508 (0.454-0.560) | 0.494 (0.413-0.573) |
| Tajikistan                       | 0.477 (0.342-0.601) | 0.474 (0.378-0.564) | 0.475 (0.402-0.547) | 0.460 (0.395-0.525) | 0.419 (0.334-0.500) |
| Tanzania                         | 0.511 (0.394-0.626) | 0.517 (0.436-0.591) | 0.507 (0.449-0.561) | 0.482 (0.435-0.527) | 0.445 (0.382-0.507) |
| Thailand                         | 0.443 (0.336-0.550) | 0.466 (0.395-0.536) | 0.480 (0.425-0.532) | 0.480 (0.434-0.526) | 0.461 (0.394-0.527) |
| Timor-Leste                      | 0.411 (0.308-0.522) | 0.429 (0.353-0.512) | 0.447 (0.382-0.518) | 0.461 (0.400-0.524) | 0.465 (0.390-0.542) |
| Togo                             | 0.513 (0.403-0.627) | 0.515 (0.437-0.592) | 0.504 (0.444-0.564) | 0.477 (0.427-0.527) | 0.443 (0.379-0.505) |
| Tokelau                          | 0.335 (0.196-0.497) | 0.298 (0.205-0.406) | 0.254 (0.192-0.323) | 0.211 (0.161-0.264) | 0.176 (0.119-0.242) |
| Tonga                            | 0.317 (0.213-0.433) | 0.275 (0.206-0.350) | 0.229 (0.177-0.283) | 0.187 (0.146-0.231) | 0.161 (0.116-0.214) |
| Trinidad and Tobago              | 0.435 (0.292-0.581) | 0.421 (0.315-0.524) | 0.399 (0.329-0.469) | 0.344 (0.277-0.413) | 0.290 (0.200-0.395) |
| Tunisia                          | 0.428 (0.310-0.546) | 0.394 (0.326-0.466) | 0.359 (0.311-0.408) | 0.322 (0.284-0.363) | 0.289 (0.236-0.347) |
| Turkey                           | 0.431 (0.322-0.543) | 0.395 (0.330-0.460) | 0.344 (0.304-0.385) | 0.303 (0.271-0.337) | 0.269 (0.221-0.318) |
| Turkmenistan                     | 0.480 (0.349-0.607) | 0.471 (0.380-0.560) | 0.445 (0.376-0.514) | 0.418 (0.358-0.479) | 0.372 (0.296-0.451) |
| Tuvalu                           | 0.363 (0.254-0.482) | 0.310 (0.241-0.386) | 0.245 (0.194-0.298) | 0.204 (0.162-0.249) | 0.178 (0.128-0.234) |
| Uganda                           | 0.522 (0.401-0.643) | 0.530 (0.440-0.620) | 0.528 (0.454-0.600) | 0.511 (0.448-0.573) | 0.480 (0.409-0.549) |
| Ukraine                          | 0.434 (0.325-0.539) | 0.415 (0.348-0.483) | 0.411 (0.357-0.466) | 0.413 (0.358-0.470) | 0.404 (0.327-0.483) |
| United Arab Emirates             | 0.278 (0.170-0.407) | 0.278 (0.209-0.352) | 0.267 (0.221-0.315) | 0.236 (0.197-0.276) | 0.229 (0.178-0.285) |
| United Kingdom                   | 0.539 (0.465-0.612) | 0.503 (0.462-0.544) | 0.451 (0.421-0.480) | 0.393 (0.365-0.420) | 0.353 (0.309-0.399) |
| United States of America         | 0.489 (0.421-0.557) | 0.451 (0.406-0.495) | 0.399 (0.363-0.434) | 0.346 (0.314-0.377) | 0.309 (0.262-0.357) |
| Uruguay                          | 0.472 (0.357-0.583) | 0.441 (0.361-0.519) | 0.406 (0.348-0.467) | 0.374 (0.324-0.425) | 0.330 (0.264-0.397) |
| Uzbekistan                       | 0.496 (0.355-0.627) | 0.488 (0.390-0.581) | 0.468 (0.395-0.540) | 0.443 (0.378-0.506) | 0.396 (0.310-0.479) |
| Vanuatu                          | 0.475 (0.328-0.623) | 0.453 (0.345-0.559) | 0.412 (0.329-0.495) | 0.367 (0.297-0.437) | 0.324 (0.246-0.408) |
| Venezuela                        | 0.430 (0.317-0.543) | 0.406 (0.332-0.482) | 0.371 (0.316-0.427) | 0.340 (0.297-0.385) | 0.311 (0.252-0.376) |
| Viet Nam                         | 0.383 (0.288-0.482) | 0.401 (0.341-0.464) | 0.421 (0.375-0.469) | 0.443 (0.400-0.486) | 0.460 (0.394-0.526) |
| Yemen                            | 0.425 (0.292-0.560) | 0.427 (0.338-0.520) | 0.413 (0.347-0.478) | 0.386 (0.329-0.443) | 0.363 (0.288-0.438) |
| Zambia                           | 0.499 (0.385-0.609) | 0.497 (0.420-0.572) | 0.485 (0.425-0.544) | 0.463 (0.412-0.514) | 0.424 (0.356-0.494) |
| Zimbabwe                         | 0.487 (0.358-0.610) | 0.470 (0.384-0.552) | 0.435 (0.373-0.496) | 0.398 (0.345-0.451) | 0.366 (0.297-0.438) |

**Men, 25 ≤ BMI < 30 kg/m<sup>2</sup>**

| Country                  | Year                |                     |                     |                     |                     |
|--------------------------|---------------------|---------------------|---------------------|---------------------|---------------------|
|                          | 1975                | 1985                | 1995                | 2005                | 2014                |
| Afghanistan              | 0.067 (0.031-0.120) | 0.076 (0.046-0.115) | 0.086 (0.056-0.122) | 0.094 (0.065-0.130) | 0.115 (0.072-0.169) |
| Albania                  | 0.291 (0.186-0.400) | 0.315 (0.243-0.392) | 0.334 (0.270-0.402) | 0.381 (0.324-0.444) | 0.419 (0.341-0.502) |
| Algeria                  | 0.223 (0.137-0.312) | 0.265 (0.204-0.328) | 0.297 (0.246-0.349) | 0.325 (0.277-0.370) | 0.357 (0.290-0.423) |
| American Samoa           | 0.358 (0.265-0.451) | 0.351 (0.285-0.416) | 0.338 (0.276-0.402) | 0.333 (0.275-0.398) | 0.329 (0.248-0.418) |
| Andorra                  | 0.371 (0.288-0.459) | 0.406 (0.342-0.469) | 0.431 (0.378-0.490) | 0.446 (0.395-0.498) | 0.442 (0.371-0.514) |
| Angola                   | 0.076 (0.033-0.138) | 0.085 (0.046-0.130) | 0.094 (0.057-0.138) | 0.108 (0.069-0.154) | 0.144 (0.085-0.213) |
| Antigua and Barbuda      | 0.231 (0.141-0.338) | 0.257 (0.191-0.334) | 0.303 (0.242-0.370) | 0.314 (0.254-0.377) | 0.321 (0.237-0.415) |
| Argentina                | 0.329 (0.222-0.433) | 0.355 (0.277-0.431) | 0.374 (0.311-0.435) | 0.394 (0.339-0.447) | 0.399 (0.332-0.469) |
| Armenia                  | 0.249 (0.137-0.374) | 0.284 (0.193-0.376) | 0.300 (0.222-0.382) | 0.336 (0.270-0.408) | 0.388 (0.305-0.471) |
| Australia                | 0.357 (0.281-0.432) | 0.397 (0.349-0.444) | 0.420 (0.381-0.461) | 0.426 (0.390-0.462) | 0.420 (0.365-0.475) |
| Austria                  | 0.326 (0.248-0.404) | 0.379 (0.326-0.429) | 0.409 (0.362-0.457) | 0.417 (0.373-0.462) | 0.417 (0.347-0.487) |
| Azerbaijan               | 0.269 (0.170-0.374) | 0.302 (0.226-0.382) | 0.312 (0.243-0.388) | 0.333 (0.269-0.403) | 0.373 (0.289-0.459) |
| Bahamas                  | 0.263 (0.171-0.359) | 0.295 (0.225-0.366) | 0.333 (0.272-0.396) | 0.357 (0.300-0.414) | 0.363 (0.288-0.443) |
| Bahrain                  | 0.294 (0.204-0.390) | 0.328 (0.265-0.384) | 0.356 (0.305-0.405) | 0.381 (0.334-0.424) | 0.398 (0.330-0.464) |
| Bangladesh               | 0.058 (0.024-0.109) | 0.064 (0.038-0.095) | 0.076 (0.053-0.103) | 0.096 (0.072-0.127) | 0.124 (0.086-0.174) |
| Barbados                 | 0.222 (0.137-0.316) | 0.264 (0.203-0.328) | 0.290 (0.236-0.345) | 0.313 (0.260-0.371) | 0.326 (0.246-0.413) |
| Belarus                  | 0.291 (0.205-0.397) | 0.329 (0.266-0.399) | 0.351 (0.293-0.414) | 0.376 (0.321-0.433) | 0.405 (0.329-0.480) |
| Belgium                  | 0.338 (0.257-0.429) | 0.390 (0.343-0.441) | 0.429 (0.389-0.470) | 0.449 (0.411-0.488) | 0.448 (0.386-0.507) |
| Belize                   | 0.181 (0.100-0.280) | 0.222 (0.161-0.289) | 0.253 (0.201-0.311) | 0.293 (0.239-0.346) | 0.314 (0.238-0.389) |
| Benin                    | 0.073 (0.035-0.130) | 0.085 (0.052-0.122) | 0.095 (0.066-0.128) | 0.114 (0.085-0.147) | 0.137 (0.094-0.192) |
| Bermuda                  | 0.305 (0.200-0.414) | 0.347 (0.262-0.426) | 0.372 (0.301-0.443) | 0.373 (0.309-0.435) | 0.364 (0.284-0.445) |
| Bhutan                   | 0.068 (0.030-0.126) | 0.082 (0.049-0.124) | 0.106 (0.073-0.149) | 0.139 (0.104-0.185) | 0.178 (0.127-0.242) |
| Bolivia                  | 0.228 (0.133-0.329) | 0.260 (0.183-0.346) | 0.294 (0.224-0.371) | 0.335 (0.274-0.402) | 0.366 (0.288-0.449) |
| Bosnia and Herzegovina   | 0.238 (0.123-0.383) | 0.267 (0.182-0.371) | 0.298 (0.228-0.377) | 0.369 (0.307-0.433) | 0.409 (0.338-0.483) |
| Botswana                 | 0.084 (0.040-0.144) | 0.105 (0.067-0.151) | 0.146 (0.103-0.193) | 0.177 (0.132-0.225) | 0.214 (0.154-0.283) |
| Brazil                   | 0.205 (0.125-0.290) | 0.260 (0.202-0.322) | 0.307 (0.261-0.357) | 0.349 (0.308-0.390) | 0.381 (0.320-0.446) |
| Brunei Darussalam        | 0.168 (0.067-0.287) | 0.204 (0.117-0.303) | 0.239 (0.171-0.318) | 0.276 (0.213-0.343) | 0.295 (0.209-0.389) |
| Bulgaria                 | 0.346 (0.252-0.449) | 0.390 (0.327-0.455) | 0.409 (0.352-0.465) | 0.412 (0.358-0.466) | 0.425 (0.348-0.500) |
| Burkina Faso             | 0.069 (0.027-0.129) | 0.076 (0.043-0.115) | 0.089 (0.061-0.120) | 0.109 (0.079-0.141) | 0.125 (0.082-0.171) |
| Burundi                  | 0.038 (0.012-0.085) | 0.045 (0.020-0.085) | 0.056 (0.030-0.094) | 0.063 (0.039-0.098) | 0.078 (0.045-0.122) |
| Cabo Verde               | 0.066 (0.027-0.125) | 0.089 (0.054-0.130) | 0.122 (0.086-0.161) | 0.176 (0.135-0.220) | 0.215 (0.151-0.282) |
| Cambodia                 | 0.048 (0.019-0.100) | 0.051 (0.029-0.080) | 0.062 (0.041-0.086) | 0.081 (0.058-0.109) | 0.109 (0.070-0.154) |
| Cameroon                 | 0.087 (0.043-0.147) | 0.108 (0.073-0.151) | 0.126 (0.092-0.165) | 0.147 (0.113-0.182) | 0.171 (0.119-0.233) |
| Canada                   | 0.362 (0.289-0.438) | 0.397 (0.352-0.443) | 0.417 (0.374-0.460) | 0.426 (0.386-0.467) | 0.422 (0.361-0.485) |
| Central African Republic | 0.060 (0.024-0.115) | 0.068 (0.036-0.116) | 0.077 (0.045-0.121) | 0.090 (0.055-0.131) | 0.109 (0.061-0.168) |
| Chad                     | 0.071 (0.032-0.124) | 0.074 (0.043-0.110) | 0.087 (0.057-0.118) | 0.103 (0.074-0.136) | 0.116 (0.073-0.167) |
| Chile                    | 0.288 (0.182-0.405) | 0.322 (0.244-0.399) | 0.356 (0.296-0.416) | 0.387 (0.335-0.436) | 0.399 (0.333-0.463) |
| China                    | 0.079 (0.035-0.138) | 0.101 (0.073-0.131) | 0.147 (0.126-0.170) | 0.230 (0.202-0.259) | 0.313 (0.259-0.368) |
| China (Hong Kong SAR)    | 0.210 (0.110-0.321) | 0.261 (0.184-0.336) | 0.305 (0.239-0.369) | 0.353 (0.284-0.418) | 0.403 (0.304-0.493) |
| Colombia                 | 0.232 (0.134-0.333) | 0.277 (0.206-0.346) | 0.318 (0.261-0.374) | 0.358 (0.310-0.405) | 0.384 (0.314-0.453) |
| Comoros                  | 0.081 (0.038-0.137) | 0.086 (0.053-0.130) | 0.098 (0.066-0.137) | 0.110 (0.081-0.146) | 0.128 (0.086-0.177) |
| Congo                    | 0.073 (0.035-0.125) | 0.093 (0.057-0.142) | 0.114 (0.073-0.164) | 0.139 (0.097-0.191) | 0.173 (0.109-0.255) |
| Cook Islands             | 0.375 (0.260-0.490) | 0.382 (0.310-0.455) | 0.364 (0.296-0.434) | 0.343 (0.283-0.408) | 0.324 (0.249-0.404) |
| Costa Rica               | 0.245 (0.147-0.349) | 0.292 (0.221-0.364) | 0.336 (0.282-0.394) | 0.371 (0.324-0.422) | 0.393 (0.328-0.465) |
| Cote d'Ivoire            | 0.105 (0.055-0.175) | 0.115 (0.077-0.164) | 0.129 (0.094-0.170) | 0.153 (0.118-0.194) | 0.180 (0.129-0.239) |
| Croatia                  | 0.303 (0.206-0.415) | 0.345 (0.280-0.416) | 0.369 (0.310-0.431) | 0.403 (0.348-0.459) | 0.430 (0.355-0.508) |
| Cuba                     | 0.211 (0.132-0.303) | 0.261 (0.199-0.322) | 0.290 (0.233-0.346) | 0.308 (0.256-0.362) | 0.341 (0.269-0.413) |
| Cyprus                   | 0.320 (0.231-0.416) | 0.362 (0.299-0.427) | 0.407 (0.351-0.464) | 0.423 (0.370-0.477) | 0.418 (0.342-0.492) |
| Czech Republic           | 0.387 (0.297-0.485) | 0.411 (0.352-0.471) | 0.426 (0.373-0.479) | 0.437 (0.388-0.488) | 0.445 (0.376-0.516) |
| Denmark                  | 0.324 (0.260-0.391) | 0.375 (0.329-0.418) | 0.416 (0.372-0.460) | 0.438 (0.393-0.484) | 0.440 (0.373-0.504) |
| Djibouti                 | 0.106 (0.049-0.183) | 0.116 (0.060-0.190) | 0.140 (0.092-0.197) | 0.162 (0.112-0.218) | 0.199 (0.128-0.280) |
| Dominica                 | 0.186 (0.109-0.281) | 0.220 (0.158-0.288) | 0.272 (0.218-0.332) | 0.318 (0.263-0.376) | 0.343 (0.267-0.421) |
| Dominican Republic       | 0.162 (0.088-0.249) | 0.200 (0.143-0.264) | 0.238 (0.186-0.293) | 0.294 (0.245-0.345) | 0.334 (0.259-0.411) |
| DR Congo                 | 0.068 (0.031-0.120) | 0.078 (0.045-0.124) | 0.086 (0.053-0.131) | 0.094 (0.057-0.140) | 0.119 (0.063-0.183) |
| Ecuador                  | 0.234 (0.137-0.341) | 0.276 (0.198-0.363) | 0.313 (0.243-0.391) | 0.347 (0.282-0.417) | 0.380 (0.300-0.460) |
| Egypt                    | 0.244 (0.152-0.346) | 0.287 (0.228-0.349) | 0.310 (0.263-0.360) | 0.327 (0.285-0.372) | 0.342 (0.277-0.408) |
| El Salvador              | 0.227 (0.133-0.330) | 0.263 (0.195-0.339) | 0.298 (0.242-0.360) | 0.338 (0.287-0.391) | 0.365 (0.293-0.440) |
| Equatorial Guinea        | 0.063 (0.025-0.121) | 0.079 (0.043-0.128) | 0.096 (0.058-0.143) | 0.155 (0.098-0.222) | 0.187 (0.103-0.288) |
| Eritrea                  | 0.064 (0.029-0.115) | 0.068 (0.041-0.106) | 0.079 (0.054-0.111) | 0.092 (0.068-0.122) | 0.104 (0.066-0.148) |
| Estonia                  | 0.302 (0.212-0.401) | 0.333 (0.276-0.391) | 0.349 (0.299-0.397) | 0.380 (0.337-0.420) | 0.403 (0.340-0.464) |
| Ethiopia                 | 0.061 (0.025-0.111) | 0.066 (0.038-0.103) | 0.072 (0.048-0.104) | 0.078 (0.055-0.105) | 0.091 (0.057-0.131) |
| Fiji                     | 0.282 (0.178-0.402) | 0.314 (0.229-0.412) | 0.329 (0.250-0.417) | 0.342 (0.271-0.417) | 0.341 (0.257-0.429) |
| Finland                  | 0.316 (0.242-0.392) | 0.365 (0.320-0.410) | 0.395 (0.353-0.436) | 0.405 (0.367-0.442) | 0.406 (0.347-0.465) |
| France                   | 0.380 (0.295-0.467) | 0.418 (0.359-0.472) | 0.442 (0.391-0.491) | 0.453 (0.402-0.501) | 0.449 (0.376-0.518) |
| French Polynesia         | 0.410 (0.302-0.521) | 0.401 (0.315-0.488) | 0.383 (0.309-0.461) | 0.361 (0.298-0.426) | 0.339 (0.265-0.416) |

|                                  |                     |                     |                     |                     |                     |
|----------------------------------|---------------------|---------------------|---------------------|---------------------|---------------------|
| Gabon                            | 0.104 (0.047-0.182) | 0.142 (0.086-0.212) | 0.173 (0.112-0.245) | 0.207 (0.144-0.280) | 0.239 (0.157-0.339) |
| Gambia                           | 0.083 (0.039-0.148) | 0.092 (0.058-0.134) | 0.116 (0.082-0.157) | 0.148 (0.110-0.190) | 0.176 (0.114-0.241) |
| Georgia                          | 0.265 (0.165-0.380) | 0.303 (0.226-0.390) | 0.308 (0.238-0.387) | 0.340 (0.277-0.415) | 0.363 (0.289-0.444) |
| Germany                          | 0.339 (0.265-0.414) | 0.396 (0.353-0.436) | 0.422 (0.385-0.459) | 0.423 (0.388-0.458) | 0.420 (0.357-0.478) |
| Ghana                            | 0.086 (0.043-0.141) | 0.093 (0.059-0.134) | 0.109 (0.074-0.148) | 0.134 (0.097-0.176) | 0.166 (0.114-0.226) |
| Greece                           | 0.351 (0.266-0.442) | 0.403 (0.346-0.464) | 0.432 (0.381-0.485) | 0.447 (0.397-0.498) | 0.445 (0.372-0.514) |
| Greenland                        | 0.330 (0.256-0.406) | 0.384 (0.333-0.436) | 0.412 (0.365-0.459) | 0.421 (0.374-0.464) | 0.420 (0.352-0.487) |
| Grenada                          | 0.183 (0.110-0.275) | 0.217 (0.162-0.286) | 0.259 (0.207-0.321) | 0.293 (0.241-0.350) | 0.320 (0.247-0.398) |
| Guatemala                        | 0.214 (0.117-0.317) | 0.248 (0.176-0.322) | 0.281 (0.225-0.344) | 0.320 (0.271-0.374) | 0.347 (0.272-0.424) |
| Guinea                           | 0.077 (0.034-0.147) | 0.093 (0.057-0.142) | 0.105 (0.072-0.145) | 0.123 (0.091-0.157) | 0.138 (0.095-0.192) |
| Guinea Bissau                    | 0.083 (0.039-0.143) | 0.095 (0.059-0.136) | 0.118 (0.080-0.157) | 0.126 (0.094-0.163) | 0.144 (0.098-0.197) |
| Guyana                           | 0.189 (0.111-0.280) | 0.215 (0.157-0.281) | 0.229 (0.177-0.285) | 0.269 (0.214-0.324) | 0.287 (0.214-0.372) |
| Haiti                            | 0.130 (0.068-0.210) | 0.148 (0.096-0.207) | 0.164 (0.113-0.219) | 0.202 (0.152-0.257) | 0.242 (0.167-0.321) |
| Honduras                         | 0.200 (0.102-0.301) | 0.235 (0.163-0.306) | 0.273 (0.216-0.331) | 0.317 (0.268-0.369) | 0.347 (0.274-0.425) |
| Hungary                          | 0.367 (0.282-0.460) | 0.400 (0.346-0.459) | 0.417 (0.363-0.471) | 0.421 (0.373-0.469) | 0.432 (0.364-0.499) |
| Iceland                          | 0.335 (0.257-0.421) | 0.392 (0.332-0.449) | 0.414 (0.363-0.464) | 0.423 (0.374-0.473) | 0.431 (0.363-0.499) |
| India                            | 0.053 (0.024-0.091) | 0.066 (0.043-0.092) | 0.083 (0.065-0.104) | 0.109 (0.089-0.131) | 0.141 (0.101-0.190) |
| Indonesia                        | 0.056 (0.025-0.099) | 0.068 (0.044-0.094) | 0.089 (0.066-0.115) | 0.120 (0.094-0.149) | 0.162 (0.114-0.215) |
| Iran                             | 0.251 (0.167-0.341) | 0.289 (0.239-0.344) | 0.316 (0.279-0.357) | 0.355 (0.324-0.386) | 0.394 (0.339-0.454) |
| Iraq                             | 0.265 (0.175-0.363) | 0.300 (0.240-0.369) | 0.319 (0.266-0.378) | 0.331 (0.281-0.379) | 0.354 (0.287-0.419) |
| Ireland                          | 0.348 (0.259-0.441) | 0.394 (0.330-0.460) | 0.420 (0.368-0.476) | 0.429 (0.381-0.480) | 0.411 (0.342-0.480) |
| Israel                           | 0.362 (0.272-0.461) | 0.401 (0.336-0.466) | 0.431 (0.376-0.485) | 0.447 (0.396-0.498) | 0.446 (0.374-0.518) |
| Italy                            | 0.363 (0.281-0.445) | 0.403 (0.358-0.449) | 0.430 (0.393-0.469) | 0.445 (0.407-0.484) | 0.443 (0.381-0.504) |
| Jamaica                          | 0.206 (0.129-0.292) | 0.227 (0.169-0.285) | 0.257 (0.206-0.307) | 0.302 (0.252-0.349) | 0.331 (0.264-0.400) |
| Japan                            | 0.131 (0.099-0.170) | 0.164 (0.140-0.190) | 0.201 (0.177-0.226) | 0.229 (0.203-0.256) | 0.251 (0.203-0.307) |
| Jordan                           | 0.264 (0.166-0.368) | 0.312 (0.251-0.373) | 0.345 (0.295-0.399) | 0.371 (0.326-0.417) | 0.388 (0.322-0.456) |
| Kazakhstan                       | 0.270 (0.173-0.377) | 0.307 (0.234-0.385) | 0.329 (0.260-0.401) | 0.354 (0.289-0.423) | 0.385 (0.301-0.469) |
| Kenya                            | 0.072 (0.033-0.125) | 0.089 (0.055-0.130) | 0.108 (0.076-0.145) | 0.121 (0.089-0.159) | 0.142 (0.093-0.205) |
| Kiribati                         | 0.390 (0.280-0.508) | 0.386 (0.295-0.476) | 0.382 (0.299-0.459) | 0.375 (0.303-0.443) | 0.362 (0.267-0.458) |
| Kuwait                           | 0.351 (0.244-0.459) | 0.380 (0.315-0.441) | 0.391 (0.340-0.440) | 0.409 (0.365-0.453) | 0.407 (0.344-0.470) |
| Kyrgyzstan                       | 0.240 (0.135-0.354) | 0.271 (0.193-0.358) | 0.291 (0.221-0.368) | 0.308 (0.244-0.380) | 0.338 (0.260-0.422) |
| Lao PDR                          | 0.054 (0.023-0.101) | 0.056 (0.034-0.088) | 0.064 (0.043-0.090) | 0.087 (0.063-0.117) | 0.125 (0.083-0.175) |
| Latvia                           | 0.306 (0.217-0.410) | 0.342 (0.282-0.409) | 0.356 (0.301-0.412) | 0.378 (0.328-0.429) | 0.411 (0.338-0.485) |
| Lebanon                          | 0.294 (0.208-0.387) | 0.331 (0.268-0.397) | 0.381 (0.320-0.441) | 0.418 (0.358-0.479) | 0.412 (0.345-0.479) |
| Lesotho                          | 0.077 (0.032-0.141) | 0.090 (0.055-0.137) | 0.106 (0.075-0.146) | 0.124 (0.093-0.161) | 0.145 (0.097-0.196) |
| Liberia                          | 0.089 (0.045-0.151) | 0.102 (0.064-0.148) | 0.098 (0.057-0.148) | 0.119 (0.084-0.161) | 0.144 (0.095-0.206) |
| Libya                            | 0.300 (0.191-0.409) | 0.354 (0.292-0.417) | 0.377 (0.324-0.429) | 0.389 (0.344-0.434) | 0.395 (0.332-0.460) |
| Lithuania                        | 0.301 (0.213-0.399) | 0.336 (0.275-0.401) | 0.351 (0.296-0.409) | 0.375 (0.328-0.424) | 0.399 (0.331-0.470) |
| Luxembourg                       | 0.347 (0.266-0.428) | 0.396 (0.335-0.455) | 0.429 (0.368-0.488) | 0.433 (0.381-0.484) | 0.429 (0.358-0.498) |
| Macedonia (TFYR)                 | 0.313 (0.219-0.420) | 0.351 (0.282-0.425) | 0.371 (0.309-0.439) | 0.400 (0.342-0.459) | 0.424 (0.347-0.504) |
| Madagascar                       | 0.085 (0.044-0.143) | 0.091 (0.059-0.133) | 0.098 (0.069-0.136) | 0.107 (0.080-0.141) | 0.123 (0.081-0.173) |
| Malawi                           | 0.062 (0.025-0.114) | 0.070 (0.041-0.108) | 0.078 (0.052-0.108) | 0.089 (0.065-0.117) | 0.103 (0.067-0.149) |
| Malaysia                         | 0.098 (0.049-0.158) | 0.131 (0.088-0.176) | 0.176 (0.135-0.222) | 0.224 (0.184-0.268) | 0.261 (0.198-0.325) |
| Maldives                         | 0.082 (0.036-0.146) | 0.098 (0.059-0.141) | 0.127 (0.081-0.173) | 0.176 (0.116-0.234) | 0.225 (0.157-0.301) |
| Mali                             | 0.080 (0.035-0.135) | 0.088 (0.053-0.129) | 0.101 (0.068-0.140) | 0.117 (0.083-0.154) | 0.139 (0.090-0.198) |
| Malta                            | 0.332 (0.216-0.459) | 0.393 (0.326-0.463) | 0.420 (0.364-0.475) | 0.437 (0.384-0.490) | 0.436 (0.359-0.511) |
| Marshall Islands                 | 0.367 (0.252-0.488) | 0.373 (0.286-0.458) | 0.371 (0.301-0.441) | 0.369 (0.300-0.439) | 0.364 (0.272-0.459) |
| Mauritania                       | 0.092 (0.046-0.163) | 0.102 (0.062-0.148) | 0.123 (0.081-0.169) | 0.147 (0.108-0.191) | 0.179 (0.123-0.244) |
| Mauritius                        | 0.118 (0.064-0.184) | 0.151 (0.104-0.202) | 0.191 (0.145-0.242) | 0.231 (0.180-0.284) | 0.255 (0.179-0.339) |
| Mexico                           | 0.250 (0.155-0.344) | 0.309 (0.236-0.373) | 0.354 (0.301-0.406) | 0.384 (0.342-0.427) | 0.398 (0.334-0.460) |
| Micronesia (Federated States of) | 0.378 (0.271-0.496) | 0.380 (0.302-0.463) | 0.372 (0.305-0.442) | 0.357 (0.300-0.415) | 0.337 (0.256-0.419) |
| Moldova                          | 0.269 (0.173-0.371) | 0.300 (0.233-0.372) | 0.311 (0.248-0.373) | 0.317 (0.259-0.373) | 0.360 (0.290-0.432) |
| Mongolia                         | 0.242 (0.137-0.362) | 0.274 (0.192-0.361) | 0.296 (0.222-0.369) | 0.324 (0.258-0.390) | 0.360 (0.280-0.439) |
| Montenegro                       | 0.329 (0.218-0.451) | 0.373 (0.297-0.454) | 0.391 (0.332-0.454) | 0.418 (0.366-0.475) | 0.438 (0.364-0.514) |
| Morocco                          | 0.221 (0.132-0.320) | 0.255 (0.193-0.324) | 0.289 (0.235-0.348) | 0.323 (0.277-0.375) | 0.354 (0.285-0.424) |
| Mozambique                       | 0.057 (0.020-0.107) | 0.064 (0.033-0.106) | 0.074 (0.045-0.110) | 0.089 (0.062-0.121) | 0.105 (0.065-0.152) |
| Myanmar                          | 0.045 (0.015-0.105) | 0.050 (0.025-0.088) | 0.060 (0.038-0.091) | 0.082 (0.058-0.111) | 0.126 (0.083-0.177) |
| Namibia                          | 0.112 (0.055-0.189) | 0.121 (0.076-0.173) | 0.133 (0.094-0.175) | 0.161 (0.123-0.206) | 0.191 (0.134-0.259) |
| Nauru                            | 0.328 (0.237-0.433) | 0.331 (0.268-0.398) | 0.329 (0.271-0.391) | 0.339 (0.276-0.407) | 0.342 (0.253-0.439) |
| Nepal                            | 0.060 (0.026-0.109) | 0.068 (0.039-0.102) | 0.084 (0.058-0.117) | 0.106 (0.078-0.140) | 0.133 (0.088-0.186) |
| Netherlands                      | 0.327 (0.252-0.404) | 0.370 (0.321-0.420) | 0.406 (0.363-0.449) | 0.434 (0.397-0.475) | 0.443 (0.381-0.503) |
| New Zealand                      | 0.357 (0.274-0.443) | 0.395 (0.338-0.449) | 0.417 (0.369-0.464) | 0.418 (0.378-0.457) | 0.408 (0.355-0.458) |
| Nicaragua                        | 0.223 (0.127-0.322) | 0.257 (0.182-0.327) | 0.275 (0.211-0.338) | 0.307 (0.257-0.361) | 0.333 (0.253-0.406) |
| Niger                            | 0.069 (0.032-0.120) | 0.070 (0.039-0.104) | 0.079 (0.050-0.111) | 0.090 (0.062-0.121) | 0.096 (0.060-0.141) |
| Nigeria                          | 0.094 (0.048-0.160) | 0.108 (0.075-0.148) | 0.120 (0.090-0.154) | 0.146 (0.117-0.178) | 0.183 (0.132-0.238) |
| Niue                             | 0.391 (0.272-0.516) | 0.394 (0.307-0.485) | 0.379 (0.306-0.456) | 0.352 (0.291-0.418) | 0.320 (0.240-0.401) |
| North Korea                      | 0.105 (0.054-0.172) | 0.131 (0.087-0.178) | 0.150 (0.107-0.195) | 0.150 (0.103-0.207) | 0.169 (0.097-0.262) |
| Norway                           | 0.313 (0.237-0.384) | 0.372 (0.323-0.420) | 0.400 (0.356-0.444) | 0.412 (0.370-0.451) | 0.413 (0.347-0.479) |

|                                  |                     |                     |                     |                     |                     |
|----------------------------------|---------------------|---------------------|---------------------|---------------------|---------------------|
| Occupied Palestinian Territory   | 0.293 (0.195-0.403) | 0.315 (0.245-0.390) | 0.334 (0.275-0.397) | 0.355 (0.304-0.410) | 0.364 (0.280-0.444) |
| Oman                             | 0.254 (0.161-0.359) | 0.304 (0.241-0.370) | 0.343 (0.293-0.392) | 0.369 (0.322-0.414) | 0.382 (0.313-0.452) |
| Pakistan                         | 0.074 (0.033-0.124) | 0.093 (0.061-0.132) | 0.117 (0.085-0.155) | 0.142 (0.109-0.182) | 0.170 (0.116-0.230) |
| Palau                            | 0.387 (0.276-0.504) | 0.379 (0.307-0.457) | 0.364 (0.299-0.432) | 0.351 (0.291-0.414) | 0.342 (0.265-0.423) |
| Panama                           | 0.254 (0.146-0.354) | 0.299 (0.230-0.368) | 0.332 (0.276-0.391) | 0.365 (0.319-0.415) | 0.382 (0.313-0.453) |
| Papua New Guinea                 | 0.255 (0.146-0.390) | 0.268 (0.183-0.370) | 0.281 (0.205-0.370) | 0.289 (0.216-0.364) | 0.294 (0.209-0.383) |
| Paraguay                         | 0.219 (0.125-0.319) | 0.255 (0.186-0.325) | 0.299 (0.239-0.359) | 0.340 (0.284-0.396) | 0.365 (0.294-0.445) |
| Peru                             | 0.243 (0.146-0.348) | 0.276 (0.196-0.358) | 0.309 (0.240-0.384) | 0.345 (0.286-0.410) | 0.377 (0.302-0.454) |
| Philippines                      | 0.091 (0.046-0.150) | 0.106 (0.073-0.146) | 0.123 (0.089-0.159) | 0.148 (0.112-0.186) | 0.177 (0.121-0.238) |
| Poland                           | 0.350 (0.261-0.446) | 0.379 (0.324-0.436) | 0.393 (0.345-0.443) | 0.411 (0.370-0.455) | 0.423 (0.358-0.486) |
| Portugal                         | 0.309 (0.224-0.408) | 0.340 (0.285-0.403) | 0.386 (0.338-0.436) | 0.421 (0.376-0.468) | 0.428 (0.352-0.496) |
| Puerto Rico                      | 0.237 (0.151-0.327) | 0.278 (0.211-0.345) | 0.318 (0.256-0.378) | 0.348 (0.293-0.403) | 0.360 (0.291-0.436) |
| Qatar                            | 0.291 (0.199-0.388) | 0.354 (0.280-0.430) | 0.373 (0.318-0.431) | 0.385 (0.330-0.440) | 0.383 (0.308-0.457) |
| Romania                          | 0.325 (0.227-0.431) | 0.375 (0.309-0.441) | 0.389 (0.334-0.444) | 0.407 (0.356-0.459) | 0.430 (0.358-0.503) |
| Russian Federation               | 0.300 (0.219-0.390) | 0.335 (0.289-0.383) | 0.352 (0.316-0.388) | 0.374 (0.333-0.412) | 0.407 (0.341-0.473) |
| Rwanda                           | 0.045 (0.016-0.097) | 0.053 (0.025-0.098) | 0.062 (0.035-0.101) | 0.075 (0.050-0.110) | 0.093 (0.058-0.141) |
| Saint Kitts and Nevis            | 0.206 (0.124-0.299) | 0.247 (0.182-0.318) | 0.283 (0.226-0.345) | 0.311 (0.253-0.373) | 0.315 (0.233-0.405) |
| Saint Lucia                      | 0.182 (0.108-0.274) | 0.212 (0.154-0.276) | 0.253 (0.202-0.312) | 0.296 (0.239-0.358) | 0.311 (0.231-0.403) |
| Saint Vincent and the Grenadines | 0.178 (0.102-0.276) | 0.208 (0.151-0.274) | 0.250 (0.197-0.311) | 0.297 (0.243-0.353) | 0.334 (0.257-0.410) |
| Samoa                            | 0.387 (0.268-0.505) | 0.387 (0.302-0.476) | 0.380 (0.308-0.456) | 0.362 (0.300-0.426) | 0.342 (0.261-0.424) |
| Sao Tome and Principe            | 0.096 (0.048-0.160) | 0.105 (0.069-0.149) | 0.127 (0.090-0.170) | 0.153 (0.115-0.195) | 0.188 (0.128-0.252) |
| Saudi Arabia                     | 0.281 (0.179-0.396) | 0.338 (0.277-0.403) | 0.366 (0.324-0.410) | 0.376 (0.337-0.416) | 0.374 (0.309-0.440) |
| Senegal                          | 0.097 (0.051-0.161) | 0.103 (0.062-0.148) | 0.116 (0.079-0.157) | 0.138 (0.102-0.178) | 0.157 (0.106-0.211) |
| Serbia                           | 0.317 (0.223-0.419) | 0.358 (0.294-0.424) | 0.377 (0.320-0.433) | 0.400 (0.352-0.449) | 0.417 (0.351-0.486) |
| Seychelles                       | 0.139 (0.080-0.212) | 0.177 (0.124-0.236) | 0.218 (0.164-0.277) | 0.256 (0.198-0.316) | 0.277 (0.206-0.353) |
| Sierra Leone                     | 0.093 (0.046-0.158) | 0.100 (0.063-0.145) | 0.106 (0.074-0.141) | 0.117 (0.087-0.149) | 0.139 (0.095-0.189) |
| Singapore                        | 0.103 (0.059-0.160) | 0.172 (0.133-0.214) | 0.232 (0.195-0.273) | 0.273 (0.236-0.314) | 0.317 (0.263-0.377) |
| Slovakia                         | 0.353 (0.257-0.460) | 0.385 (0.323-0.452) | 0.408 (0.354-0.459) | 0.419 (0.372-0.466) | 0.427 (0.354-0.500) |
| Slovenia                         | 0.332 (0.233-0.441) | 0.373 (0.309-0.443) | 0.395 (0.339-0.455) | 0.422 (0.368-0.477) | 0.434 (0.358-0.513) |
| Solomon Islands                  | 0.224 (0.122-0.349) | 0.247 (0.163-0.344) | 0.257 (0.184-0.339) | 0.258 (0.189-0.331) | 0.264 (0.178-0.350) |
| Somalia                          | 0.088 (0.040-0.154) | 0.095 (0.055-0.146) | 0.103 (0.067-0.148) | 0.114 (0.075-0.158) | 0.127 (0.075-0.187) |
| South Africa                     | 0.158 (0.097-0.240) | 0.182 (0.137-0.239) | 0.203 (0.160-0.250) | 0.228 (0.190-0.270) | 0.257 (0.201-0.318) |
| South Korea                      | 0.064 (0.034-0.109) | 0.135 (0.102-0.175) | 0.212 (0.173-0.252) | 0.265 (0.227-0.301) | 0.333 (0.274-0.393) |
| Spain                            | 0.338 (0.256-0.428) | 0.392 (0.340-0.443) | 0.427 (0.386-0.468) | 0.442 (0.403-0.481) | 0.438 (0.374-0.500) |
| Sri Lanka                        | 0.068 (0.032-0.119) | 0.075 (0.048-0.107) | 0.090 (0.064-0.122) | 0.112 (0.082-0.144) | 0.140 (0.090-0.202) |
| Sudan                            | 0.093 (0.047-0.154) | 0.108 (0.070-0.157) | 0.122 (0.085-0.166) | 0.148 (0.110-0.191) | 0.173 (0.118-0.240) |
| Suriname                         | 0.212 (0.128-0.303) | 0.246 (0.181-0.315) | 0.271 (0.213-0.333) | 0.313 (0.255-0.370) | 0.335 (0.261-0.410) |
| Swaziland                        | 0.100 (0.050-0.168) | 0.120 (0.079-0.169) | 0.143 (0.103-0.192) | 0.169 (0.127-0.220) | 0.186 (0.125-0.260) |
| Sweden                           | 0.316 (0.245-0.388) | 0.364 (0.324-0.404) | 0.394 (0.359-0.431) | 0.408 (0.374-0.444) | 0.412 (0.353-0.471) |
| Switzerland                      | 0.351 (0.257-0.442) | 0.399 (0.337-0.459) | 0.425 (0.377-0.471) | 0.428 (0.386-0.470) | 0.426 (0.365-0.486) |
| Syrian Arab Republic             | 0.247 (0.159-0.347) | 0.311 (0.242-0.379) | 0.329 (0.274-0.386) | 0.357 (0.310-0.404) | 0.374 (0.304-0.442) |
| Taiwan                           | 0.130 (0.078-0.190) | 0.185 (0.139-0.231) | 0.255 (0.204-0.303) | 0.314 (0.259-0.368) | 0.339 (0.259-0.420) |
| Tajikistan                       | 0.246 (0.143-0.360) | 0.270 (0.188-0.356) | 0.275 (0.200-0.351) | 0.271 (0.204-0.344) | 0.302 (0.222-0.396) |
| Tanzania                         | 0.073 (0.032-0.128) | 0.081 (0.049-0.121) | 0.091 (0.063-0.128) | 0.103 (0.079-0.136) | 0.127 (0.088-0.174) |
| Thailand                         | 0.081 (0.041-0.135) | 0.095 (0.062-0.132) | 0.120 (0.090-0.155) | 0.158 (0.127-0.192) | 0.201 (0.145-0.265) |
| Timor-Leste                      | 0.046 (0.020-0.091) | 0.047 (0.027-0.073) | 0.056 (0.035-0.082) | 0.066 (0.046-0.094) | 0.086 (0.054-0.130) |
| Togo                             | 0.072 (0.033-0.125) | 0.081 (0.050-0.119) | 0.095 (0.067-0.128) | 0.111 (0.084-0.144) | 0.129 (0.088-0.180) |
| Tokelau                          | 0.398 (0.245-0.565) | 0.395 (0.288-0.512) | 0.378 (0.292-0.468) | 0.350 (0.270-0.428) | 0.316 (0.216-0.416) |
| Tonga                            | 0.404 (0.288-0.526) | 0.400 (0.316-0.492) | 0.385 (0.313-0.463) | 0.364 (0.305-0.431) | 0.339 (0.259-0.425) |
| Trinidad and Tobago              | 0.218 (0.107-0.342) | 0.254 (0.170-0.349) | 0.266 (0.201-0.338) | 0.294 (0.229-0.366) | 0.304 (0.208-0.416) |
| Tunisia                          | 0.244 (0.158-0.340) | 0.291 (0.226-0.356) | 0.328 (0.272-0.382) | 0.362 (0.310-0.406) | 0.386 (0.322-0.449) |
| Turkey                           | 0.296 (0.204-0.398) | 0.334 (0.276-0.396) | 0.367 (0.321-0.412) | 0.395 (0.355-0.433) | 0.409 (0.354-0.467) |
| Turkmenistan                     | 0.254 (0.154-0.364) | 0.286 (0.209-0.370) | 0.312 (0.243-0.389) | 0.329 (0.268-0.397) | 0.362 (0.283-0.445) |
| Tuvalu                           | 0.375 (0.257-0.501) | 0.378 (0.294-0.467) | 0.374 (0.303-0.445) | 0.364 (0.300-0.429) | 0.353 (0.273-0.442) |
| Uganda                           | 0.062 (0.025-0.116) | 0.064 (0.034-0.107) | 0.072 (0.039-0.111) | 0.088 (0.055-0.127) | 0.111 (0.070-0.165) |
| Ukraine                          | 0.294 (0.207-0.396) | 0.331 (0.272-0.398) | 0.349 (0.292-0.408) | 0.362 (0.303-0.417) | 0.399 (0.323-0.475) |
| United Arab Emirates             | 0.348 (0.224-0.477) | 0.394 (0.316-0.471) | 0.412 (0.357-0.467) | 0.404 (0.351-0.453) | 0.396 (0.325-0.465) |
| United Kingdom                   | 0.360 (0.285-0.437) | 0.394 (0.351-0.436) | 0.416 (0.383-0.448) | 0.423 (0.394-0.452) | 0.415 (0.367-0.462) |
| United States of America         | 0.368 (0.296-0.443) | 0.398 (0.352-0.444) | 0.412 (0.370-0.453) | 0.407 (0.371-0.442) | 0.392 (0.337-0.446) |
| Uruguay                          | 0.289 (0.184-0.407) | 0.320 (0.246-0.400) | 0.348 (0.288-0.410) | 0.379 (0.326-0.434) | 0.393 (0.320-0.470) |
| Uzbekistan                       | 0.254 (0.139-0.376) | 0.284 (0.200-0.376) | 0.307 (0.236-0.383) | 0.317 (0.253-0.386) | 0.343 (0.259-0.427) |
| Vanuatu                          | 0.275 (0.166-0.405) | 0.284 (0.197-0.377) | 0.291 (0.216-0.371) | 0.296 (0.229-0.366) | 0.299 (0.219-0.384) |
| Venezuela                        | 0.281 (0.180-0.385) | 0.329 (0.259-0.401) | 0.359 (0.303-0.418) | 0.385 (0.338-0.434) | 0.404 (0.337-0.471) |
| Viet Nam                         | 0.050 (0.025-0.101) | 0.051 (0.031-0.076) | 0.062 (0.042-0.084) | 0.090 (0.066-0.115) | 0.140 (0.097-0.194) |
| Yemen                            | 0.200 (0.116-0.305) | 0.220 (0.156-0.294) | 0.241 (0.186-0.306) | 0.261 (0.207-0.319) | 0.282 (0.207-0.360) |
| Zambia                           | 0.098 (0.054-0.156) | 0.111 (0.073-0.157) | 0.118 (0.084-0.156) | 0.129 (0.099-0.165) | 0.150 (0.106-0.208) |
| Zimbabwe                         | 0.097 (0.049-0.161) | 0.111 (0.073-0.154) | 0.126 (0.092-0.167) | 0.145 (0.110-0.183) | 0.159 (0.105-0.219) |



**Women, 25 ≤ BMI < 30 kg/m<sup>2</sup>**

| Country                  | Year                |                     |                     |                     |                     |
|--------------------------|---------------------|---------------------|---------------------|---------------------|---------------------|
|                          | 1975                | 1985                | 1995                | 2005                | 2014                |
| Afghanistan              | 0.062 (0.031-0.108) | 0.080 (0.050-0.118) | 0.099 (0.071-0.135) | 0.120 (0.090-0.157) | 0.152 (0.107-0.206) |
| Albania                  | 0.235 (0.144-0.339) | 0.252 (0.187-0.324) | 0.261 (0.209-0.317) | 0.274 (0.226-0.325) | 0.283 (0.217-0.353) |
| Algeria                  | 0.235 (0.147-0.336) | 0.268 (0.206-0.333) | 0.293 (0.247-0.342) | 0.309 (0.265-0.355) | 0.316 (0.252-0.383) |
| American Samoa           | 0.311 (0.226-0.403) | 0.294 (0.232-0.363) | 0.277 (0.221-0.336) | 0.265 (0.208-0.323) | 0.257 (0.182-0.336) |
| Andorra                  | 0.285 (0.201-0.373) | 0.301 (0.243-0.364) | 0.307 (0.257-0.359) | 0.310 (0.262-0.359) | 0.310 (0.244-0.380) |
| Angola                   | 0.108 (0.053-0.183) | 0.133 (0.086-0.189) | 0.160 (0.116-0.211) | 0.189 (0.142-0.243) | 0.220 (0.154-0.295) |
| Antigua and Barbuda      | 0.246 (0.155-0.350) | 0.273 (0.204-0.350) | 0.294 (0.231-0.357) | 0.301 (0.238-0.366) | 0.303 (0.216-0.392) |
| Argentina                | 0.288 (0.196-0.387) | 0.299 (0.233-0.370) | 0.305 (0.251-0.361) | 0.304 (0.257-0.349) | 0.295 (0.233-0.360) |
| Armenia                  | 0.260 (0.156-0.382) | 0.285 (0.210-0.371) | 0.295 (0.235-0.360) | 0.307 (0.255-0.362) | 0.319 (0.249-0.396) |
| Australia                | 0.237 (0.174-0.301) | 0.261 (0.222-0.302) | 0.282 (0.248-0.318) | 0.294 (0.261-0.326) | 0.297 (0.246-0.350) |
| Austria                  | 0.230 (0.166-0.302) | 0.251 (0.207-0.298) | 0.269 (0.231-0.311) | 0.283 (0.245-0.322) | 0.292 (0.231-0.353) |
| Azerbaijan               | 0.256 (0.161-0.363) | 0.282 (0.212-0.358) | 0.295 (0.237-0.355) | 0.308 (0.254-0.364) | 0.320 (0.245-0.398) |
| Bahamas                  | 0.285 (0.196-0.383) | 0.299 (0.236-0.369) | 0.305 (0.250-0.365) | 0.303 (0.250-0.358) | 0.298 (0.229-0.371) |
| Bahrain                  | 0.300 (0.203-0.401) | 0.312 (0.248-0.376) | 0.318 (0.267-0.368) | 0.322 (0.267-0.369) | 0.324 (0.258-0.391) |
| Bangladesh               | 0.055 (0.028-0.092) | 0.072 (0.047-0.101) | 0.093 (0.069-0.119) | 0.121 (0.096-0.149) | 0.155 (0.114-0.204) |
| Barbados                 | 0.229 (0.145-0.325) | 0.257 (0.193-0.326) | 0.277 (0.224-0.332) | 0.295 (0.242-0.349) | 0.300 (0.223-0.381) |
| Belarus                  | 0.266 (0.174-0.374) | 0.286 (0.222-0.355) | 0.292 (0.240-0.346) | 0.292 (0.243-0.342) | 0.294 (0.224-0.368) |
| Belgium                  | 0.269 (0.192-0.351) | 0.281 (0.235-0.330) | 0.291 (0.256-0.330) | 0.297 (0.261-0.336) | 0.296 (0.237-0.354) |
| Belize                   | 0.236 (0.146-0.341) | 0.260 (0.198-0.330) | 0.282 (0.231-0.337) | 0.300 (0.251-0.352) | 0.307 (0.237-0.382) |
| Benin                    | 0.106 (0.058-0.167) | 0.137 (0.098-0.181) | 0.166 (0.131-0.203) | 0.196 (0.164-0.228) | 0.221 (0.172-0.272) |
| Bermuda                  | 0.307 (0.207-0.415) | 0.308 (0.233-0.389) | 0.309 (0.247-0.376) | 0.302 (0.246-0.361) | 0.288 (0.216-0.367) |
| Bhutan                   | 0.064 (0.031-0.109) | 0.088 (0.056-0.127) | 0.123 (0.089-0.162) | 0.163 (0.128-0.205) | 0.202 (0.150-0.264) |
| Bolivia                  | 0.257 (0.162-0.360) | 0.291 (0.220-0.368) | 0.323 (0.265-0.385) | 0.341 (0.289-0.397) | 0.343 (0.270-0.417) |
| Bosnia and Herzegovina   | 0.215 (0.115-0.346) | 0.238 (0.162-0.328) | 0.254 (0.195-0.320) | 0.280 (0.226-0.336) | 0.283 (0.219-0.351) |
| Botswana                 | 0.131 (0.066-0.217) | 0.181 (0.121-0.251) | 0.230 (0.176-0.291) | 0.253 (0.201-0.307) | 0.263 (0.196-0.334) |
| Brazil                   | 0.228 (0.153-0.315) | 0.261 (0.210-0.317) | 0.280 (0.239-0.322) | 0.288 (0.253-0.325) | 0.290 (0.235-0.348) |
| Brunei Darussalam        | 0.193 (0.093-0.320) | 0.216 (0.136-0.313) | 0.238 (0.178-0.306) | 0.255 (0.201-0.313) | 0.256 (0.184-0.339) |
| Bulgaria                 | 0.280 (0.189-0.381) | 0.292 (0.230-0.360) | 0.292 (0.243-0.346) | 0.291 (0.244-0.342) | 0.287 (0.218-0.360) |
| Burkina Faso             | 0.080 (0.040-0.134) | 0.103 (0.069-0.143) | 0.131 (0.100-0.166) | 0.168 (0.136-0.201) | 0.193 (0.146-0.245) |
| Burundi                  | 0.072 (0.031-0.131) | 0.093 (0.054-0.144) | 0.120 (0.082-0.168) | 0.150 (0.110-0.194) | 0.182 (0.128-0.242) |
| Cabo Verde               | 0.101 (0.053-0.163) | 0.137 (0.095-0.182) | 0.179 (0.139-0.223) | 0.218 (0.179-0.259) | 0.236 (0.181-0.296) |
| Cambodia                 | 0.053 (0.023-0.096) | 0.071 (0.045-0.102) | 0.098 (0.072-0.127) | 0.130 (0.102-0.160) | 0.165 (0.122-0.215) |
| Cameroon                 | 0.128 (0.075-0.195) | 0.169 (0.125-0.216) | 0.196 (0.158-0.235) | 0.224 (0.192-0.259) | 0.246 (0.195-0.302) |
| Canada                   | 0.242 (0.180-0.310) | 0.274 (0.233-0.318) | 0.297 (0.259-0.336) | 0.310 (0.272-0.347) | 0.312 (0.256-0.371) |
| Central African Republic | 0.106 (0.053-0.176) | 0.127 (0.081-0.183) | 0.146 (0.103-0.192) | 0.168 (0.125-0.214) | 0.191 (0.132-0.259) |
| Chad                     | 0.092 (0.049-0.148) | 0.113 (0.078-0.153) | 0.140 (0.107-0.175) | 0.174 (0.140-0.211) | 0.201 (0.150-0.258) |
| Chile                    | 0.293 (0.195-0.402) | 0.312 (0.242-0.386) | 0.316 (0.264-0.370) | 0.313 (0.270-0.360) | 0.303 (0.242-0.368) |
| China                    | 0.096 (0.053-0.152) | 0.123 (0.096-0.155) | 0.159 (0.136-0.183) | 0.208 (0.180-0.238) | 0.249 (0.196-0.306) |
| China (Hong Kong SAR)    | 0.242 (0.142-0.362) | 0.252 (0.184-0.329) | 0.254 (0.197-0.314) | 0.250 (0.194-0.308) | 0.250 (0.171-0.335) |
| Colombia                 | 0.274 (0.181-0.373) | 0.306 (0.242-0.374) | 0.326 (0.277-0.376) | 0.335 (0.295-0.377) | 0.334 (0.272-0.397) |
| Comoros                  | 0.124 (0.069-0.191) | 0.146 (0.103-0.194) | 0.172 (0.133-0.216) | 0.197 (0.162-0.236) | 0.230 (0.169-0.275) |
| Congo                    | 0.133 (0.076-0.204) | 0.167 (0.119-0.220) | 0.194 (0.149-0.242) | 0.215 (0.170-0.263) | 0.231 (0.169-0.296) |
| Cook Islands             | 0.329 (0.226-0.444) | 0.310 (0.241-0.384) | 0.288 (0.226-0.354) | 0.274 (0.217-0.334) | 0.264 (0.193-0.339) |
| Costa Rica               | 0.254 (0.162-0.356) | 0.287 (0.221-0.360) | 0.319 (0.266-0.374) | 0.332 (0.286-0.379) | 0.330 (0.267-0.396) |
| Cote d'Ivoire            | 0.143 (0.086-0.214) | 0.168 (0.125-0.216) | 0.190 (0.153-0.229) | 0.217 (0.183-0.254) | 0.236 (0.184-0.291) |
| Croatia                  | 0.243 (0.157-0.345) | 0.267 (0.206-0.332) | 0.276 (0.227-0.329) | 0.285 (0.238-0.335) | 0.287 (0.221-0.360) |
| Cuba                     | 0.262 (0.173-0.360) | 0.290 (0.226-0.357) | 0.305 (0.251-0.361) | 0.316 (0.265-0.368) | 0.320 (0.253-0.391) |
| Cyprus                   | 0.226 (0.149-0.314) | 0.273 (0.216-0.333) | 0.293 (0.245-0.343) | 0.303 (0.255-0.352) | 0.307 (0.240-0.380) |
| Czech Republic           | 0.294 (0.204-0.393) | 0.301 (0.242-0.366) | 0.299 (0.250-0.349) | 0.295 (0.249-0.342) | 0.291 (0.226-0.361) |
| Denmark                  | 0.250 (0.182-0.324) | 0.273 (0.227-0.320) | 0.284 (0.244-0.325) | 0.289 (0.248-0.331) | 0.293 (0.233-0.354) |
| Djibouti                 | 0.171 (0.093-0.267) | 0.185 (0.116-0.264) | 0.202 (0.147-0.264) | 0.209 (0.158-0.265) | 0.220 (0.151-0.297) |
| Dominica                 | 0.236 (0.155-0.334) | 0.269 (0.208-0.337) | 0.295 (0.242-0.351) | 0.304 (0.254-0.356) | 0.305 (0.237-0.373) |
| Dominican Republic       | 0.221 (0.141-0.313) | 0.261 (0.205-0.323) | 0.284 (0.238-0.336) | 0.301 (0.256-0.349) | 0.305 (0.240-0.374) |
| DR Congo                 | 0.111 (0.060-0.174) | 0.132 (0.089-0.181) | 0.154 (0.112-0.199) | 0.176 (0.133-0.222) | 0.201 (0.144-0.268) |
| Ecuador                  | 0.261 (0.162-0.370) | 0.301 (0.228-0.380) | 0.330 (0.270-0.394) | 0.343 (0.291-0.398) | 0.345 (0.274-0.421) |
| Egypt                    | 0.263 (0.168-0.372) | 0.289 (0.232-0.353) | 0.302 (0.259-0.348) | 0.309 (0.271-0.350) | 0.305 (0.245-0.367) |
| El Salvador              | 0.255 (0.164-0.357) | 0.287 (0.222-0.358) | 0.314 (0.263-0.370) | 0.329 (0.285-0.374) | 0.331 (0.268-0.398) |
| Equatorial Guinea        | 0.110 (0.054-0.182) | 0.136 (0.089-0.190) | 0.168 (0.121-0.220) | 0.224 (0.166-0.288) | 0.246 (0.163-0.338) |
| Eritrea                  | 0.086 (0.044-0.142) | 0.104 (0.069-0.145) | 0.130 (0.098-0.165) | 0.159 (0.125-0.196) | 0.184 (0.133-0.240) |
| Estonia                  | 0.290 (0.200-0.392) | 0.296 (0.237-0.360) | 0.294 (0.250-0.341) | 0.292 (0.255-0.330) | 0.289 (0.232-0.349) |
| Ethiopia                 | 0.086 (0.044-0.147) | 0.105 (0.070-0.148) | 0.127 (0.094-0.162) | 0.152 (0.119-0.187) | 0.182 (0.133-0.237) |
| Fiji                     | 0.272 (0.159-0.398) | 0.296 (0.209-0.388) | 0.314 (0.242-0.390) | 0.325 (0.260-0.392) | 0.325 (0.252-0.406) |
| Finland                  | 0.221 (0.159-0.291) | 0.255 (0.215-0.299) | 0.279 (0.245-0.317) | 0.288 (0.254-0.324) | 0.287 (0.232-0.342) |
| France                   | 0.244 (0.171-0.323) | 0.260 (0.210-0.313) | 0.276 (0.231-0.323) | 0.289 (0.243-0.335) | 0.296 (0.232-0.366) |
| French Polynesia         | 0.306 (0.202-0.419) | 0.296 (0.216-0.384) | 0.286 (0.217-0.361) | 0.279 (0.220-0.344) | 0.272 (0.201-0.352) |
| Gabon                    | 0.158 (0.082-0.255) | 0.204 (0.141-0.276) | 0.230 (0.175-0.291) | 0.249 (0.195-0.305) | 0.251 (0.183-0.323) |
| Gambia                   | 0.110 (0.061-0.172) | 0.138 (0.097-0.183) | 0.171 (0.132-0.213) | 0.204 (0.168-0.243) | 0.221 (0.168-0.278) |
| Georgia                  | 0.254 (0.161-0.365) | 0.285 (0.213-0.363) | 0.295 (0.235-0.358) | 0.307 (0.254-0.365) | 0.310 (0.241-0.386) |

|                                  |                     |                     |                     |                     |                     |
|----------------------------------|---------------------|---------------------|---------------------|---------------------|---------------------|
| Germany                          | 0.236 (0.174-0.305) | 0.255 (0.217-0.295) | 0.271 (0.239-0.303) | 0.281 (0.248-0.315) | 0.284 (0.228-0.341) |
| Ghana                            | 0.136 (0.080-0.203) | 0.159 (0.116-0.207) | 0.190 (0.152-0.229) | 0.222 (0.183-0.263) | 0.243 (0.187-0.302) |
| Greece                           | 0.261 (0.181-0.349) | 0.285 (0.231-0.343) | 0.299 (0.252-0.346) | 0.309 (0.262-0.356) | 0.309 (0.244-0.380) |
| Greenland                        | 0.243 (0.174-0.317) | 0.267 (0.220-0.319) | 0.282 (0.242-0.324) | 0.290 (0.252-0.330) | 0.292 (0.233-0.356) |
| Grenada                          | 0.223 (0.140-0.319) | 0.255 (0.194-0.323) | 0.283 (0.230-0.340) | 0.301 (0.249-0.355) | 0.307 (0.235-0.386) |
| Guatemala                        | 0.245 (0.154-0.348) | 0.280 (0.211-0.351) | 0.310 (0.258-0.365) | 0.328 (0.282-0.376) | 0.333 (0.266-0.402) |
| Guinea                           | 0.105 (0.056-0.171) | 0.139 (0.096-0.186) | 0.165 (0.127-0.205) | 0.194 (0.161-0.229) | 0.216 (0.169-0.270) |
| Guinea Bissau                    | 0.103 (0.056-0.165) | 0.132 (0.092-0.177) | 0.171 (0.132-0.214) | 0.192 (0.155-0.230) | 0.210 (0.157-0.266) |
| Guyana                           | 0.221 (0.138-0.319) | 0.253 (0.190-0.323) | 0.278 (0.223-0.336) | 0.300 (0.243-0.358) | 0.306 (0.230-0.385) |
| Haiti                            | 0.165 (0.097-0.251) | 0.199 (0.145-0.260) | 0.232 (0.183-0.283) | 0.264 (0.214-0.317) | 0.283 (0.212-0.358) |
| Honduras                         | 0.223 (0.136-0.324) | 0.263 (0.198-0.331) | 0.296 (0.246-0.351) | 0.317 (0.272-0.364) | 0.323 (0.257-0.388) |
| Hungary                          | 0.275 (0.188-0.372) | 0.282 (0.225-0.344) | 0.281 (0.232-0.333) | 0.282 (0.237-0.330) | 0.283 (0.217-0.353) |
| Iceland                          | 0.253 (0.178-0.332) | 0.281 (0.225-0.339) | 0.290 (0.245-0.339) | 0.293 (0.247-0.340) | 0.292 (0.228-0.361) |
| India                            | 0.060 (0.032-0.095) | 0.080 (0.055-0.107) | 0.104 (0.084-0.126) | 0.134 (0.113-0.156) | 0.166 (0.127-0.211) |
| Indonesia                        | 0.070 (0.036-0.114) | 0.098 (0.069-0.131) | 0.135 (0.106-0.167) | 0.172 (0.143-0.203) | 0.202 (0.154-0.255) |
| Iran                             | 0.254 (0.167-0.359) | 0.290 (0.236-0.351) | 0.314 (0.276-0.354) | 0.333 (0.303-0.365) | 0.345 (0.290-0.401) |
| Iraq                             | 0.278 (0.184-0.379) | 0.303 (0.238-0.370) | 0.313 (0.263-0.365) | 0.315 (0.268-0.364) | 0.316 (0.247-0.388) |
| Ireland                          | 0.185 (0.125-0.254) | 0.226 (0.179-0.278) | 0.263 (0.221-0.308) | 0.286 (0.244-0.332) | 0.298 (0.238-0.361) |
| Israel                           | 0.287 (0.201-0.384) | 0.301 (0.241-0.364) | 0.311 (0.263-0.363) | 0.315 (0.268-0.364) | 0.314 (0.247-0.386) |
| Italy                            | 0.257 (0.185-0.335) | 0.273 (0.228-0.319) | 0.289 (0.253-0.326) | 0.305 (0.268-0.344) | 0.316 (0.256-0.381) |
| Jamaica                          | 0.247 (0.163-0.343) | 0.274 (0.218-0.335) | 0.292 (0.245-0.341) | 0.303 (0.259-0.351) | 0.304 (0.239-0.373) |
| Japan                            | 0.138 (0.106-0.175) | 0.148 (0.127-0.171) | 0.155 (0.136-0.177) | 0.159 (0.138-0.183) | 0.159 (0.121-0.200) |
| Jordan                           | 0.278 (0.181-0.386) | 0.299 (0.240-0.362) | 0.312 (0.267-0.361) | 0.312 (0.273-0.354) | 0.306 (0.246-0.371) |
| Kazakhstan                       | 0.247 (0.156-0.353) | 0.274 (0.206-0.348) | 0.292 (0.236-0.351) | 0.306 (0.251-0.362) | 0.316 (0.240-0.400) |
| Kenya                            | 0.099 (0.053-0.160) | 0.131 (0.092-0.178) | 0.164 (0.128-0.203) | 0.199 (0.163-0.240) | 0.228 (0.171-0.292) |
| Kiribati                         | 0.322 (0.220-0.437) | 0.338 (0.261-0.422) | 0.338 (0.268-0.412) | 0.326 (0.261-0.394) | 0.313 (0.230-0.402) |
| Kuwait                           | 0.300 (0.195-0.410) | 0.315 (0.251-0.381) | 0.314 (0.266-0.364) | 0.310 (0.266-0.355) | 0.303 (0.241-0.370) |
| Kyrgyzstan                       | 0.217 (0.128-0.322) | 0.249 (0.180-0.323) | 0.272 (0.215-0.332) | 0.292 (0.240-0.348) | 0.312 (0.242-0.386) |
| Lao PDR                          | 0.061 (0.030-0.104) | 0.078 (0.051-0.112) | 0.102 (0.075-0.133) | 0.138 (0.109-0.171) | 0.174 (0.131-0.225) |
| Latvia                           | 0.286 (0.193-0.395) | 0.295 (0.233-0.364) | 0.294 (0.242-0.348) | 0.294 (0.246-0.343) | 0.292 (0.225-0.363) |
| Lebanon                          | 0.289 (0.201-0.390) | 0.316 (0.252-0.384) | 0.337 (0.280-0.396) | 0.346 (0.288-0.404) | 0.332 (0.266-0.400) |
| Lesotho                          | 0.142 (0.072-0.232) | 0.180 (0.124-0.247) | 0.220 (0.170-0.278) | 0.252 (0.204-0.304) | 0.267 (0.203-0.337) |
| Liberia                          | 0.127 (0.073-0.193) | 0.158 (0.113-0.208) | 0.167 (0.118-0.222) | 0.193 (0.156-0.235) | 0.219 (0.166-0.279) |
| Libya                            | 0.275 (0.167-0.391) | 0.306 (0.241-0.373) | 0.319 (0.270-0.369) | 0.322 (0.279-0.366) | 0.318 (0.258-0.382) |
| Lithuania                        | 0.278 (0.186-0.387) | 0.294 (0.233-0.360) | 0.295 (0.247-0.347) | 0.296 (0.251-0.344) | 0.293 (0.226-0.363) |
| Luxembourg                       | 0.232 (0.164-0.307) | 0.250 (0.199-0.305) | 0.267 (0.216-0.320) | 0.284 (0.240-0.328) | 0.286 (0.224-0.353) |
| Macedonia (TFYR)                 | 0.264 (0.174-0.370) | 0.279 (0.215-0.348) | 0.283 (0.232-0.337) | 0.286 (0.236-0.335) | 0.289 (0.222-0.361) |
| Madagascar                       | 0.103 (0.057-0.167) | 0.125 (0.088-0.168) | 0.149 (0.114-0.185) | 0.176 (0.142-0.210) | 0.203 (0.150-0.260) |
| Malawi                           | 0.093 (0.047-0.156) | 0.120 (0.081-0.163) | 0.146 (0.112-0.184) | 0.177 (0.145-0.213) | 0.208 (0.156-0.264) |
| Malaysia                         | 0.106 (0.059-0.164) | 0.145 (0.105-0.191) | 0.185 (0.147-0.227) | 0.215 (0.182-0.252) | 0.232 (0.180-0.289) |
| Maldives                         | 0.089 (0.047-0.145) | 0.125 (0.086-0.171) | 0.162 (0.120-0.209) | 0.205 (0.155-0.258) | 0.232 (0.170-0.298) |
| Mali                             | 0.097 (0.052-0.158) | 0.123 (0.085-0.167) | 0.152 (0.115-0.190) | 0.182 (0.149-0.217) | 0.204 (0.155-0.260) |
| Malta                            | 0.271 (0.167-0.391) | 0.287 (0.224-0.354) | 0.295 (0.245-0.345) | 0.300 (0.252-0.351) | 0.300 (0.232-0.373) |
| Marshall Islands                 | 0.335 (0.225-0.453) | 0.328 (0.250-0.411) | 0.311 (0.249-0.378) | 0.299 (0.240-0.363) | 0.287 (0.209-0.370) |
| Mauritania                       | 0.101 (0.052-0.164) | 0.134 (0.093-0.182) | 0.166 (0.125-0.213) | 0.192 (0.152-0.235) | 0.211 (0.157-0.272) |
| Mauritius                        | 0.163 (0.098-0.244) | 0.192 (0.142-0.248) | 0.223 (0.178-0.273) | 0.249 (0.203-0.299) | 0.264 (0.196-0.339) |
| Mexico                           | 0.288 (0.194-0.388) | 0.314 (0.254-0.380) | 0.330 (0.286-0.377) | 0.333 (0.296-0.371) | 0.328 (0.270-0.386) |
| Micronesia (Federated States of) | 0.308 (0.207-0.421) | 0.313 (0.240-0.393) | 0.310 (0.248-0.375) | 0.303 (0.250-0.360) | 0.295 (0.225-0.370) |
| Moldova                          | 0.255 (0.161-0.364) | 0.279 (0.215-0.347) | 0.285 (0.233-0.341) | 0.283 (0.234-0.335) | 0.287 (0.221-0.357) |
| Mongolia                         | 0.218 (0.129-0.328) | 0.250 (0.180-0.329) | 0.270 (0.212-0.332) | 0.286 (0.234-0.338) | 0.302 (0.235-0.376) |
| Montenegro                       | 0.246 (0.147-0.367) | 0.273 (0.201-0.354) | 0.284 (0.229-0.341) | 0.285 (0.238-0.337) | 0.287 (0.220-0.357) |
| Morocco                          | 0.228 (0.143-0.333) | 0.266 (0.207-0.333) | 0.294 (0.247-0.345) | 0.312 (0.266-0.360) | 0.320 (0.255-0.388) |
| Mozambique                       | 0.088 (0.042-0.152) | 0.113 (0.073-0.162) | 0.143 (0.107-0.185) | 0.172 (0.137-0.209) | 0.198 (0.148-0.253) |
| Myanmar                          | 0.062 (0.023-0.120) | 0.079 (0.046-0.120) | 0.103 (0.074-0.137) | 0.137 (0.108-0.170) | 0.179 (0.135-0.231) |
| Namibia                          | 0.159 (0.082-0.259) | 0.189 (0.128-0.258) | 0.218 (0.167-0.273) | 0.246 (0.199-0.295) | 0.262 (0.202-0.327) |
| Nauru                            | 0.300 (0.211-0.398) | 0.280 (0.218-0.347) | 0.276 (0.220-0.334) | 0.278 (0.217-0.342) | 0.269 (0.184-0.361) |
| Nepal                            | 0.053 (0.025-0.091) | 0.069 (0.044-0.101) | 0.096 (0.071-0.125) | 0.131 (0.104-0.162) | 0.169 (0.125-0.221) |
| Netherlands                      | 0.229 (0.164-0.304) | 0.254 (0.212-0.303) | 0.278 (0.243-0.318) | 0.295 (0.260-0.331) | 0.297 (0.241-0.354) |
| New Zealand                      | 0.230 (0.165-0.300) | 0.256 (0.212-0.302) | 0.279 (0.243-0.318) | 0.293 (0.261-0.327) | 0.292 (0.246-0.341) |
| Nicaragua                        | 0.254 (0.165-0.353) | 0.281 (0.219-0.348) | 0.302 (0.252-0.357) | 0.316 (0.272-0.364) | 0.318 (0.252-0.385) |
| Niger                            | 0.087 (0.046-0.144) | 0.106 (0.072-0.147) | 0.131 (0.098-0.167) | 0.160 (0.128-0.195) | 0.187 (0.141-0.241) |
| Nigeria                          | 0.118 (0.066-0.187) | 0.145 (0.105-0.190) | 0.174 (0.141-0.209) | 0.211 (0.179-0.243) | 0.241 (0.193-0.292) |
| Niue                             | 0.305 (0.196-0.429) | 0.305 (0.226-0.392) | 0.295 (0.230-0.365) | 0.284 (0.227-0.345) | 0.270 (0.201-0.346) |
| North Korea                      | 0.157 (0.092-0.240) | 0.175 (0.126-0.232) | 0.183 (0.139-0.231) | 0.179 (0.128-0.235) | 0.184 (0.115-0.263) |
| Norway                           | 0.234 (0.166-0.307) | 0.269 (0.223-0.318) | 0.289 (0.250-0.330) | 0.299 (0.259-0.339) | 0.300 (0.239-0.362) |
| Occupied Palestinian Territory   | 0.286 (0.191-0.395) | 0.307 (0.237-0.383) | 0.318 (0.263-0.374) | 0.317 (0.272-0.367) | 0.310 (0.239-0.386) |
| Oman                             | 0.233 (0.137-0.344) | 0.285 (0.220-0.355) | 0.315 (0.267-0.363) | 0.324 (0.280-0.369) | 0.325 (0.261-0.394) |
| Pakistan                         | 0.077 (0.041-0.126) | 0.101 (0.069-0.141) | 0.127 (0.097-0.165) | 0.153 (0.122-0.191) | 0.178 (0.133-0.232) |
| Palau                            | 0.300 (0.197-0.416) | 0.302 (0.232-0.378) | 0.292 (0.231-0.358) | 0.283 (0.223-0.342) | 0.274 (0.200-0.354) |
| Panama                           | 0.275 (0.183-0.380) | 0.307 (0.241-0.379) | 0.328 (0.277-0.385) | 0.339 (0.294-0.386) | 0.334 (0.270-0.402) |
| Papua New Guinea                 | 0.215 (0.114-0.338) | 0.249 (0.165-0.343) | 0.280 (0.208-0.360) | 0.305 (0.239-0.376) | 0.321 (0.238-0.409) |

|                                  |                     |                     |                     |                     |                     |
|----------------------------------|---------------------|---------------------|---------------------|---------------------|---------------------|
| Paraguay                         | 0.206 (0.129-0.298) | 0.241 (0.183-0.306) | 0.268 (0.218-0.322) | 0.284 (0.237-0.337) | 0.293 (0.229-0.361) |
| Peru                             | 0.292 (0.193-0.398) | 0.322 (0.247-0.398) | 0.340 (0.282-0.401) | 0.355 (0.310-0.403) | 0.360 (0.300-0.422) |
| Philippines                      | 0.096 (0.056-0.147) | 0.125 (0.093-0.160) | 0.154 (0.124-0.186) | 0.176 (0.147-0.209) | 0.198 (0.148-0.252) |
| Poland                           | 0.268 (0.185-0.364) | 0.278 (0.223-0.337) | 0.281 (0.236-0.328) | 0.285 (0.245-0.328) | 0.286 (0.225-0.352) |
| Portugal                         | 0.211 (0.136-0.297) | 0.236 (0.183-0.294) | 0.266 (0.222-0.313) | 0.287 (0.244-0.331) | 0.297 (0.234-0.367) |
| Puerto Rico                      | 0.272 (0.182-0.368) | 0.299 (0.234-0.366) | 0.307 (0.251-0.366) | 0.303 (0.253-0.356) | 0.296 (0.231-0.365) |
| Qatar                            | 0.312 (0.213-0.418) | 0.308 (0.234-0.385) | 0.316 (0.263-0.371) | 0.311 (0.263-0.360) | 0.303 (0.238-0.373) |
| Romania                          | 0.259 (0.170-0.364) | 0.280 (0.219-0.346) | 0.286 (0.237-0.337) | 0.290 (0.244-0.339) | 0.293 (0.227-0.363) |
| Russian Federation               | 0.288 (0.201-0.380) | 0.296 (0.246-0.348) | 0.294 (0.260-0.329) | 0.290 (0.253-0.329) | 0.286 (0.223-0.352) |
| Rwanda                           | 0.082 (0.038-0.146) | 0.107 (0.064-0.160) | 0.135 (0.094-0.182) | 0.172 (0.131-0.216) | 0.206 (0.151-0.268) |
| Saint Kitts and Nevis            | 0.233 (0.149-0.332) | 0.266 (0.201-0.340) | 0.286 (0.230-0.345) | 0.297 (0.241-0.355) | 0.299 (0.218-0.383) |
| Saint Lucia                      | 0.216 (0.135-0.313) | 0.250 (0.190-0.316) | 0.276 (0.223-0.331) | 0.294 (0.240-0.350) | 0.302 (0.221-0.388) |
| Saint Vincent and the Grenadines | 0.219 (0.136-0.316) | 0.255 (0.193-0.323) | 0.282 (0.229-0.338) | 0.299 (0.246-0.351) | 0.307 (0.236-0.382) |
| Samoa                            | 0.314 (0.207-0.431) | 0.313 (0.238-0.393) | 0.301 (0.238-0.367) | 0.288 (0.232-0.345) | 0.278 (0.210-0.351) |
| Sao Tome and Principe            | 0.137 (0.080-0.207) | 0.161 (0.117-0.212) | 0.196 (0.154-0.243) | 0.221 (0.180-0.264) | 0.239 (0.181-0.298) |
| Saudi Arabia                     | 0.269 (0.165-0.385) | 0.300 (0.238-0.365) | 0.311 (0.269-0.353) | 0.310 (0.271-0.349) | 0.301 (0.243-0.362) |
| Senegal                          | 0.131 (0.078-0.197) | 0.152 (0.109-0.198) | 0.174 (0.136-0.215) | 0.200 (0.165-0.238) | 0.221 (0.170-0.277) |
| Serbia                           | 0.246 (0.158-0.346) | 0.263 (0.204-0.327) | 0.270 (0.223-0.320) | 0.272 (0.231-0.316) | 0.275 (0.214-0.337) |
| Seychelles                       | 0.187 (0.113-0.274) | 0.225 (0.166-0.289) | 0.248 (0.195-0.305) | 0.264 (0.212-0.321) | 0.268 (0.199-0.344) |
| Sierra Leone                     | 0.122 (0.070-0.190) | 0.146 (0.105-0.195) | 0.165 (0.129-0.206) | 0.190 (0.157-0.225) | 0.215 (0.167-0.265) |
| Singapore                        | 0.159 (0.095-0.235) | 0.186 (0.145-0.234) | 0.200 (0.165-0.240) | 0.201 (0.168-0.239) | 0.212 (0.162-0.266) |
| Slovakia                         | 0.246 (0.160-0.348) | 0.269 (0.212-0.332) | 0.280 (0.234-0.328) | 0.284 (0.240-0.329) | 0.288 (0.224-0.358) |
| Slovenia                         | 0.243 (0.155-0.351) | 0.265 (0.205-0.332) | 0.275 (0.225-0.328) | 0.285 (0.238-0.335) | 0.290 (0.222-0.363) |
| Solomon Islands                  | 0.217 (0.116-0.346) | 0.257 (0.171-0.354) | 0.289 (0.216-0.370) | 0.314 (0.249-0.384) | 0.328 (0.245-0.414) |
| Somalia                          | 0.103 (0.054-0.169) | 0.123 (0.080-0.176) | 0.144 (0.103-0.190) | 0.162 (0.119-0.208) | 0.183 (0.127-0.246) |
| South Africa                     | 0.219 (0.130-0.318) | 0.237 (0.175-0.303) | 0.250 (0.203-0.301) | 0.260 (0.222-0.299) | 0.260 (0.210-0.314) |
| South Korea                      | 0.078 (0.045-0.121) | 0.140 (0.108-0.177) | 0.192 (0.156-0.230) | 0.207 (0.175-0.243) | 0.241 (0.190-0.300) |
| Spain                            | 0.251 (0.175-0.332) | 0.276 (0.229-0.328) | 0.293 (0.255-0.333) | 0.302 (0.264-0.340) | 0.306 (0.246-0.368) |
| Sri Lanka                        | 0.086 (0.045-0.139) | 0.110 (0.076-0.150) | 0.141 (0.108-0.178) | 0.178 (0.143-0.217) | 0.216 (0.154-0.283) |
| Sudan                            | 0.115 (0.063-0.181) | 0.142 (0.099-0.190) | 0.172 (0.131-0.215) | 0.200 (0.160-0.244) | 0.222 (0.165-0.285) |
| Suriname                         | 0.256 (0.166-0.357) | 0.286 (0.222-0.356) | 0.297 (0.240-0.354) | 0.304 (0.252-0.356) | 0.304 (0.234-0.376) |
| Swaziland                        | 0.149 (0.077-0.239) | 0.189 (0.129-0.259) | 0.227 (0.173-0.289) | 0.256 (0.205-0.310) | 0.273 (0.201-0.349) |
| Sweden                           | 0.257 (0.188-0.329) | 0.275 (0.232-0.319) | 0.288 (0.252-0.325) | 0.298 (0.261-0.336) | 0.303 (0.245-0.362) |
| Switzerland                      | 0.232 (0.158-0.317) | 0.261 (0.210-0.317) | 0.289 (0.248-0.332) | 0.298 (0.257-0.338) | 0.299 (0.238-0.362) |
| Syrian Arab Republic             | 0.250 (0.161-0.353) | 0.289 (0.226-0.357) | 0.303 (0.254-0.356) | 0.318 (0.273-0.365) | 0.324 (0.259-0.392) |
| Taiwan                           | 0.148 (0.091-0.219) | 0.192 (0.146-0.244) | 0.227 (0.185-0.273) | 0.247 (0.203-0.294) | 0.252 (0.185-0.323) |
| Tajikistan                       | 0.224 (0.134-0.332) | 0.250 (0.181-0.326) | 0.267 (0.209-0.327) | 0.284 (0.230-0.342) | 0.309 (0.236-0.388) |
| Tanzania                         | 0.099 (0.053-0.160) | 0.127 (0.089-0.172) | 0.156 (0.122-0.193) | 0.185 (0.154-0.219) | 0.214 (0.166-0.266) |
| Thailand                         | 0.092 (0.049-0.147) | 0.124 (0.089-0.165) | 0.157 (0.125-0.194) | 0.193 (0.162-0.229) | 0.217 (0.165-0.274) |
| Timor-Leste                      | 0.053 (0.025-0.092) | 0.070 (0.044-0.100) | 0.092 (0.066-0.121) | 0.114 (0.087-0.144) | 0.141 (0.099-0.191) |
| Togo                             | 0.110 (0.061-0.169) | 0.133 (0.095-0.175) | 0.162 (0.128-0.198) | 0.194 (0.161-0.227) | 0.218 (0.169-0.270) |
| Tokelau                          | 0.282 (0.145-0.444) | 0.296 (0.194-0.409) | 0.298 (0.224-0.381) | 0.294 (0.230-0.365) | 0.284 (0.200-0.377) |
| Tonga                            | 0.314 (0.199-0.436) | 0.315 (0.236-0.399) | 0.305 (0.240-0.377) | 0.293 (0.236-0.353) | 0.283 (0.212-0.357) |
| Trinidad and Tobago              | 0.213 (0.107-0.343) | 0.248 (0.160-0.345) | 0.275 (0.211-0.344) | 0.297 (0.230-0.365) | 0.301 (0.202-0.407) |
| Tunisia                          | 0.255 (0.165-0.359) | 0.292 (0.231-0.359) | 0.315 (0.268-0.363) | 0.326 (0.285-0.368) | 0.328 (0.266-0.391) |
| Turkey                           | 0.265 (0.177-0.366) | 0.299 (0.242-0.362) | 0.322 (0.281-0.365) | 0.327 (0.293-0.363) | 0.322 (0.267-0.378) |
| Turkmenistan                     | 0.238 (0.148-0.343) | 0.263 (0.196-0.337) | 0.286 (0.228-0.346) | 0.303 (0.251-0.357) | 0.319 (0.247-0.397) |
| Tuvalu                           | 0.314 (0.208-0.430) | 0.320 (0.243-0.399) | 0.308 (0.244-0.374) | 0.295 (0.237-0.357) | 0.282 (0.206-0.364) |
| Uganda                           | 0.089 (0.044-0.151) | 0.111 (0.071-0.161) | 0.141 (0.102-0.186) | 0.176 (0.135-0.221) | 0.210 (0.157-0.270) |
| Ukraine                          | 0.289 (0.195-0.394) | 0.300 (0.237-0.367) | 0.301 (0.249-0.353) | 0.296 (0.245-0.349) | 0.294 (0.225-0.368) |
| United Arab Emirates             | 0.279 (0.162-0.407) | 0.308 (0.233-0.388) | 0.321 (0.269-0.376) | 0.318 (0.272-0.365) | 0.317 (0.254-0.386) |
| United Kingdom                   | 0.238 (0.175-0.303) | 0.265 (0.227-0.302) | 0.289 (0.261-0.317) | 0.301 (0.277-0.327) | 0.302 (0.259-0.346) |
| United States of America         | 0.241 (0.183-0.302) | 0.262 (0.223-0.303) | 0.277 (0.243-0.310) | 0.282 (0.251-0.312) | 0.280 (0.232-0.330) |
| Uruguay                          | 0.282 (0.182-0.390) | 0.294 (0.224-0.370) | 0.299 (0.245-0.356) | 0.299 (0.250-0.349) | 0.293 (0.228-0.363) |
| Uzbekistan                       | 0.224 (0.134-0.334) | 0.256 (0.186-0.337) | 0.281 (0.223-0.344) | 0.299 (0.245-0.357) | 0.320 (0.245-0.399) |
| Vanuatu                          | 0.229 (0.123-0.356) | 0.265 (0.180-0.362) | 0.295 (0.225-0.371) | 0.314 (0.253-0.382) | 0.323 (0.244-0.407) |
| Venezuela                        | 0.316 (0.218-0.421) | 0.336 (0.267-0.408) | 0.348 (0.294-0.403) | 0.350 (0.303-0.397) | 0.343 (0.277-0.408) |
| Viet Nam                         | 0.059 (0.029-0.099) | 0.073 (0.048-0.101) | 0.096 (0.071-0.121) | 0.133 (0.104-0.160) | 0.175 (0.126-0.224) |
| Yemen                            | 0.179 (0.097-0.281) | 0.214 (0.151-0.286) | 0.249 (0.196-0.302) | 0.279 (0.228-0.332) | 0.297 (0.224-0.369) |
| Zambia                           | 0.146 (0.086-0.222) | 0.174 (0.126-0.225) | 0.191 (0.150-0.233) | 0.212 (0.175-0.251) | 0.235 (0.183-0.294) |
| Zimbabwe                         | 0.169 (0.093-0.262) | 0.205 (0.146-0.271) | 0.235 (0.186-0.289) | 0.257 (0.211-0.306) | 0.269 (0.206-0.337) |

Men, 30 ≤ BMI < 35 kg/m<sup>2</sup>

| Country                  | Year                |                     |                     |                     |                     |
|--------------------------|---------------------|---------------------|---------------------|---------------------|---------------------|
|                          | 1975                | 1985                | 1995                | 2005                | 2014                |
| Afghanistan              | 0.004 (0.001-0.012) | 0.006 (0.002-0.013) | 0.007 (0.003-0.016) | 0.010 (0.004-0.019) | 0.016 (0.006-0.033) |
| Albania                  | 0.041 (0.014-0.087) | 0.056 (0.027-0.095) | 0.071 (0.039-0.111) | 0.104 (0.066-0.151) | 0.139 (0.083-0.205) |
| Algeria                  | 0.033 (0.012-0.068) | 0.053 (0.028-0.086) | 0.077 (0.046-0.113) | 0.103 (0.069-0.143) | 0.132 (0.083-0.193) |
| American Samoa           | 0.200 (0.124-0.289) | 0.217 (0.155-0.287) | 0.231 (0.168-0.297) | 0.239 (0.176-0.304) | 0.242 (0.164-0.330) |
| Andorra                  | 0.086 (0.041-0.149) | 0.118 (0.072-0.172) | 0.142 (0.094-0.197) | 0.174 (0.125-0.229) | 0.190 (0.124-0.260) |
| Angola                   | 0.005 (0.001-0.015) | 0.008 (0.002-0.018) | 0.012 (0.004-0.024) | 0.018 (0.008-0.035) | 0.035 (0.013-0.070) |
| Antigua and Barbuda      | 0.036 (0.012-0.076) | 0.051 (0.024-0.090) | 0.081 (0.045-0.128) | 0.108 (0.064-0.161) | 0.139 (0.073-0.221) |
| Argentina                | 0.100 (0.048-0.173) | 0.123 (0.077-0.178) | 0.143 (0.099-0.193) | 0.168 (0.126-0.217) | 0.198 (0.140-0.265) |
| Armenia                  | 0.050 (0.014-0.112) | 0.064 (0.027-0.116) | 0.070 (0.034-0.118) | 0.089 (0.050-0.139) | 0.130 (0.074-0.200) |
| Australia                | 0.090 (0.053-0.138) | 0.111 (0.083-0.143) | 0.136 (0.108-0.168) | 0.168 (0.138-0.199) | 0.194 (0.147-0.243) |
| Austria                  | 0.060 (0.030-0.100) | 0.082 (0.054-0.118) | 0.108 (0.075-0.147) | 0.137 (0.100-0.179) | 0.161 (0.105-0.223) |
| Azerbaijan               | 0.047 (0.016-0.099) | 0.063 (0.031-0.108) | 0.072 (0.038-0.117) | 0.089 (0.051-0.136) | 0.141 (0.080-0.214) |
| Bahamas                  | 0.065 (0.027-0.121) | 0.089 (0.051-0.141) | 0.120 (0.076-0.175) | 0.149 (0.101-0.203) | 0.166 (0.104-0.236) |
| Bahrain                  | 0.079 (0.034-0.143) | 0.105 (0.065-0.152) | 0.135 (0.093-0.182) | 0.165 (0.120-0.213) | 0.186 (0.124-0.251) |
| Bangladesh               | 0.003 (0.001-0.007) | 0.004 (0.001-0.008) | 0.006 (0.003-0.011) | 0.009 (0.005-0.016) | 0.016 (0.007-0.030) |
| Barbados                 | 0.035 (0.012-0.073) | 0.053 (0.028-0.087) | 0.071 (0.043-0.107) | 0.099 (0.063-0.142) | 0.128 (0.071-0.200) |
| Belarus                  | 0.052 (0.020-0.104) | 0.077 (0.042-0.124) | 0.097 (0.059-0.147) | 0.122 (0.079-0.173) | 0.160 (0.099-0.228) |
| Belgium                  | 0.082 (0.043-0.134) | 0.103 (0.074-0.136) | 0.129 (0.100-0.161) | 0.159 (0.126-0.194) | 0.180 (0.129-0.238) |
| Belize                   | 0.035 (0.011-0.075) | 0.047 (0.024-0.079) | 0.063 (0.036-0.096) | 0.088 (0.056-0.128) | 0.112 (0.064-0.173) |
| Benin                    | 0.005 (0.001-0.014) | 0.008 (0.003-0.017) | 0.011 (0.005-0.022) | 0.017 (0.009-0.029) | 0.024 (0.011-0.046) |
| Bermuda                  | 0.105 (0.046-0.186) | 0.134 (0.076-0.203) | 0.160 (0.100-0.228) | 0.180 (0.123-0.242) | 0.206 (0.133-0.285) |
| Bhutan                   | 0.004 (0.001-0.010) | 0.006 (0.002-0.013) | 0.011 (0.005-0.022) | 0.021 (0.011-0.037) | 0.038 (0.018-0.069) |
| Bolivia                  | 0.030 (0.009-0.065) | 0.044 (0.019-0.079) | 0.060 (0.031-0.100) | 0.082 (0.048-0.124) | 0.107 (0.058-0.168) |
| Bosnia and Herzegovina   | 0.028 (0.006-0.074) | 0.039 (0.014-0.079) | 0.051 (0.024-0.090) | 0.095 (0.057-0.141) | 0.122 (0.074-0.180) |
| Botswana                 | 0.006 (0.001-0.016) | 0.012 (0.004-0.024) | 0.028 (0.013-0.050) | 0.046 (0.024-0.074) | 0.072 (0.036-0.121) |
| Brazil                   | 0.033 (0.013-0.064) | 0.055 (0.033-0.082) | 0.080 (0.056-0.107) | 0.108 (0.083-0.134) | 0.140 (0.098-0.191) |
| Brunei Darussalam        | 0.021 (0.004-0.059) | 0.034 (0.011-0.074) | 0.054 (0.025-0.096) | 0.084 (0.046-0.134) | 0.112 (0.057-0.185) |
| Bulgaria                 | 0.068 (0.029-0.128) | 0.101 (0.061-0.153) | 0.125 (0.082-0.176) | 0.141 (0.098-0.193) | 0.168 (0.108-0.240) |
| Burkina Faso             | 0.004 (0.001-0.012) | 0.005 (0.002-0.012) | 0.008 (0.003-0.016) | 0.014 (0.007-0.024) | 0.022 (0.009-0.040) |
| Burundi                  | 0.001 (0.000-0.005) | 0.002 (0.000-0.006) | 0.003 (0.001-0.009) | 0.005 (0.002-0.010) | 0.008 (0.002-0.018) |
| Cabo Verde               | 0.005 (0.001-0.015) | 0.009 (0.003-0.019) | 0.018 (0.008-0.033) | 0.037 (0.020-0.061) | 0.060 (0.030-0.101) |
| Cambodia                 | 0.002 (0.000-0.005) | 0.002 (0.001-0.005) | 0.004 (0.001-0.007) | 0.007 (0.003-0.013) | 0.014 (0.006-0.028) |
| Cameroon                 | 0.007 (0.002-0.018) | 0.011 (0.005-0.022) | 0.017 (0.009-0.030) | 0.025 (0.015-0.040) | 0.036 (0.018-0.063) |
| Canada                   | 0.077 (0.043-0.125) | 0.102 (0.072-0.138) | 0.131 (0.098-0.169) | 0.165 (0.128-0.204) | 0.189 (0.134-0.246) |
| Central African Republic | 0.004 (0.001-0.014) | 0.006 (0.001-0.015) | 0.008 (0.003-0.017) | 0.010 (0.004-0.020) | 0.015 (0.005-0.033) |
| Chad                     | 0.005 (0.001-0.013) | 0.006 (0.002-0.013) | 0.009 (0.004-0.017) | 0.014 (0.007-0.024) | 0.022 (0.009-0.043) |
| Chile                    | 0.081 (0.033-0.150) | 0.102 (0.060-0.156) | 0.128 (0.088-0.173) | 0.161 (0.121-0.203) | 0.189 (0.134-0.251) |
| China                    | 0.003 (0.001-0.008) | 0.005 (0.003-0.009) | 0.013 (0.009-0.017) | 0.033 (0.024-0.043) | 0.067 (0.042-0.096) |
| China (Hong Kong SAR)    | 0.029 (0.008-0.066) | 0.041 (0.018-0.075) | 0.061 (0.033-0.098) | 0.084 (0.046-0.131) | 0.119 (0.058-0.195) |
| Colombia                 | 0.038 (0.014-0.078) | 0.056 (0.030-0.089) | 0.078 (0.048-0.111) | 0.102 (0.072-0.136) | 0.129 (0.082-0.184) |
| Comoros                  | 0.005 (0.001-0.014) | 0.007 (0.002-0.015) | 0.010 (0.004-0.019) | 0.013 (0.006-0.024) | 0.019 (0.008-0.036) |
| Congo                    | 0.006 (0.001-0.016) | 0.011 (0.004-0.022) | 0.017 (0.007-0.032) | 0.025 (0.012-0.044) | 0.039 (0.016-0.075) |
| Cook Islands             | 0.166 (0.083-0.266) | 0.193 (0.127-0.265) | 0.224 (0.155-0.295) | 0.245 (0.179-0.311) | 0.255 (0.179-0.334) |
| Costa Rica               | 0.037 (0.013-0.076) | 0.057 (0.029-0.093) | 0.083 (0.051-0.125) | 0.115 (0.080-0.158) | 0.147 (0.096-0.207) |
| Cote d'Ivoire            | 0.008 (0.002-0.021) | 0.012 (0.005-0.024) | 0.017 (0.008-0.030) | 0.024 (0.013-0.041) | 0.034 (0.016-0.061) |
| Croatia                  | 0.046 (0.017-0.094) | 0.073 (0.040-0.117) | 0.098 (0.061-0.143) | 0.132 (0.089-0.182) | 0.169 (0.108-0.237) |
| Cuba                     | 0.041 (0.016-0.080) | 0.066 (0.037-0.103) | 0.084 (0.052-0.122) | 0.098 (0.065-0.136) | 0.128 (0.079-0.187) |
| Cyprus                   | 0.039 (0.014-0.079) | 0.067 (0.037-0.109) | 0.107 (0.068-0.155) | 0.142 (0.096-0.195) | 0.164 (0.101-0.237) |
| Czech Republic           | 0.098 (0.049-0.163) | 0.129 (0.087-0.180) | 0.150 (0.107-0.198) | 0.173 (0.129-0.220) | 0.197 (0.136-0.263) |
| Denmark                  | 0.062 (0.035-0.096) | 0.084 (0.058-0.113) | 0.113 (0.082-0.148) | 0.144 (0.107-0.184) | 0.163 (0.110-0.219) |
| Djibouti                 | 0.017 (0.004-0.043) | 0.020 (0.006-0.046) | 0.026 (0.010-0.051) | 0.031 (0.013-0.058) | 0.043 (0.016-0.086) |
| Dominica                 | 0.029 (0.009-0.061) | 0.043 (0.021-0.074) | 0.071 (0.041-0.111) | 0.097 (0.061-0.143) | 0.126 (0.074-0.190) |
| Dominican Republic       | 0.021 (0.007-0.046) | 0.036 (0.018-0.062) | 0.054 (0.031-0.083) | 0.087 (0.057-0.124) | 0.122 (0.074-0.181) |
| DR Congo                 | 0.005 (0.001-0.013) | 0.006 (0.002-0.015) | 0.009 (0.003-0.018) | 0.010 (0.004-0.020) | 0.016 (0.005-0.035) |
| Ecuador                  | 0.029 (0.009-0.063) | 0.047 (0.022-0.083) | 0.069 (0.038-0.111) | 0.093 (0.057-0.137) | 0.122 (0.071-0.186) |
| Egypt                    | 0.050 (0.019-0.099) | 0.072 (0.042-0.109) | 0.095 (0.065-0.134) | 0.122 (0.090-0.162) | 0.152 (0.100-0.214) |
| El Salvador              | 0.036 (0.012-0.076) | 0.051 (0.025-0.087) | 0.071 (0.041-0.110) | 0.100 (0.065-0.143) | 0.125 (0.075-0.187) |
| Equatorial Guinea        | 0.004 (0.001-0.014) | 0.007 (0.002-0.016) | 0.011 (0.004-0.023) | 0.037 (0.015-0.071) | 0.068 (0.024-0.138) |
| Eritrea                  | 0.004 (0.001-0.010) | 0.005 (0.001-0.010) | 0.007 (0.003-0.013) | 0.010 (0.005-0.018) | 0.014 (0.005-0.027) |
| Estonia                  | 0.067 (0.032-0.120) | 0.087 (0.057-0.125) | 0.101 (0.071-0.136) | 0.130 (0.101-0.162) | 0.163 (0.118-0.216) |
| Ethiopia                 | 0.003 (0.001-0.010) | 0.004 (0.001-0.009) | 0.005 (0.002-0.010) | 0.007 (0.003-0.013) | 0.011 (0.004-0.023) |
| Fiji                     | 0.082 (0.029-0.165) | 0.111 (0.055-0.184) | 0.138 (0.078-0.210) | 0.168 (0.107-0.236) | 0.187 (0.117-0.264) |
| Finland                  | 0.060 (0.032-0.097) | 0.088 (0.063-0.116) | 0.118 (0.091-0.150) | 0.145 (0.117-0.176) | 0.164 (0.117-0.215) |
| France                   | 0.070 (0.036-0.119) | 0.095 (0.062-0.136) | 0.122 (0.086-0.162) | 0.152 (0.112-0.194) | 0.172 (0.116-0.235) |
| French Polynesia         | 0.202 (0.109-0.310) | 0.230 (0.149-0.321) | 0.253 (0.176-0.335) | 0.268 (0.202-0.338) | 0.279 (0.202-0.358) |

|                                  |                     |                     |                     |                     |                     |
|----------------------------------|---------------------|---------------------|---------------------|---------------------|---------------------|
| Gabon                            | 0.009 (0.002-0.025) | 0.021 (0.007-0.045) | 0.037 (0.015-0.069) | 0.055 (0.026-0.095) | 0.077 (0.035-0.136) |
| Gambia                           | 0.007 (0.001-0.018) | 0.009 (0.003-0.020) | 0.016 (0.007-0.029) | 0.024 (0.012-0.041) | 0.035 (0.015-0.065) |
| Georgia                          | 0.049 (0.016-0.103) | 0.069 (0.033-0.121) | 0.074 (0.038-0.126) | 0.095 (0.055-0.148) | 0.127 (0.073-0.196) |
| Germany                          | 0.068 (0.037-0.108) | 0.094 (0.071-0.121) | 0.121 (0.097-0.149) | 0.147 (0.119-0.179) | 0.172 (0.120-0.226) |
| Ghana                            | 0.007 (0.002-0.017) | 0.009 (0.003-0.018) | 0.013 (0.006-0.024) | 0.021 (0.011-0.035) | 0.033 (0.015-0.062) |
| Greece                           | 0.063 (0.029-0.112) | 0.092 (0.057-0.136) | 0.119 (0.080-0.166) | 0.151 (0.107-0.201) | 0.174 (0.111-0.243) |
| Greenland                        | 0.065 (0.031-0.112) | 0.093 (0.058-0.136) | 0.121 (0.083-0.167) | 0.152 (0.110-0.201) | 0.180 (0.120-0.246) |
| Grenada                          | 0.024 (0.008-0.052) | 0.035 (0.016-0.062) | 0.056 (0.031-0.091) | 0.084 (0.051-0.127) | 0.116 (0.064-0.179) |
| Guatemala                        | 0.031 (0.010-0.066) | 0.043 (0.021-0.076) | 0.060 (0.035-0.095) | 0.085 (0.054-0.124) | 0.110 (0.063-0.169) |
| Guinea                           | 0.005 (0.001-0.015) | 0.008 (0.002-0.017) | 0.011 (0.005-0.021) | 0.016 (0.008-0.027) | 0.022 (0.009-0.041) |
| Guinea Bissau                    | 0.006 (0.001-0.015) | 0.008 (0.003-0.017) | 0.014 (0.006-0.027) | 0.018 (0.009-0.032) | 0.024 (0.010-0.046) |
| Guyana                           | 0.026 (0.009-0.057) | 0.036 (0.017-0.063) | 0.046 (0.025-0.076) | 0.071 (0.041-0.110) | 0.097 (0.051-0.158) |
| Haiti                            | 0.012 (0.003-0.031) | 0.018 (0.007-0.035) | 0.025 (0.011-0.045) | 0.039 (0.019-0.067) | 0.056 (0.024-0.103) |
| Honduras                         | 0.025 (0.007-0.054) | 0.037 (0.017-0.066) | 0.053 (0.029-0.086) | 0.077 (0.047-0.114) | 0.102 (0.057-0.159) |
| Hungary                          | 0.090 (0.045-0.152) | 0.120 (0.080-0.168) | 0.143 (0.102-0.191) | 0.164 (0.122-0.211) | 0.189 (0.130-0.256) |
| Iceland                          | 0.070 (0.034-0.118) | 0.095 (0.058-0.138) | 0.116 (0.077-0.158) | 0.140 (0.097-0.187) | 0.163 (0.102-0.225) |
| India                            | 0.003 (0.001-0.006) | 0.004 (0.002-0.007) | 0.007 (0.004-0.010) | 0.012 (0.008-0.017) | 0.021 (0.012-0.034) |
| Indonesia                        | 0.002 (0.000-0.006) | 0.004 (0.001-0.007) | 0.008 (0.004-0.013) | 0.016 (0.009-0.024) | 0.030 (0.016-0.052) |
| Iran                             | 0.038 (0.015-0.076) | 0.059 (0.037-0.087) | 0.080 (0.058-0.106) | 0.110 (0.088-0.133) | 0.143 (0.102-0.190) |
| Iraq                             | 0.057 (0.023-0.110) | 0.080 (0.045-0.125) | 0.094 (0.057-0.140) | 0.113 (0.075-0.161) | 0.146 (0.088-0.211) |
| Ireland                          | 0.061 (0.028-0.109) | 0.087 (0.052-0.129) | 0.118 (0.079-0.163) | 0.166 (0.122-0.213) | 0.194 (0.132-0.260) |
| Israel                           | 0.087 (0.042-0.153) | 0.109 (0.069-0.158) | 0.134 (0.092-0.180) | 0.159 (0.116-0.208) | 0.182 (0.122-0.252) |
| Italy                            | 0.065 (0.035-0.109) | 0.089 (0.065-0.118) | 0.115 (0.091-0.143) | 0.148 (0.120-0.179) | 0.175 (0.125-0.232) |
| Jamaica                          | 0.030 (0.011-0.061) | 0.041 (0.022-0.066) | 0.059 (0.037-0.086) | 0.085 (0.057-0.118) | 0.112 (0.066-0.168) |
| Japan                            | 0.006 (0.003-0.011) | 0.009 (0.006-0.013) | 0.015 (0.011-0.020) | 0.023 (0.017-0.031) | 0.035 (0.021-0.054) |
| Jordan                           | 0.060 (0.023-0.119) | 0.090 (0.056-0.135) | 0.122 (0.084-0.171) | 0.149 (0.111-0.196) | 0.177 (0.119-0.243) |
| Kazakhstan                       | 0.052 (0.018-0.105) | 0.072 (0.036-0.122) | 0.092 (0.051-0.145) | 0.119 (0.072-0.175) | 0.162 (0.095-0.242) |
| Kenya                            | 0.004 (0.001-0.012) | 0.007 (0.002-0.015) | 0.011 (0.005-0.021) | 0.016 (0.008-0.029) | 0.025 (0.010-0.049) |
| Kiribati                         | 0.127 (0.062-0.217) | 0.149 (0.090-0.219) | 0.168 (0.107-0.237) | 0.193 (0.131-0.259) | 0.201 (0.124-0.288) |
| Kuwait                           | 0.107 (0.048-0.186) | 0.144 (0.099-0.196) | 0.170 (0.128-0.215) | 0.207 (0.165-0.251) | 0.226 (0.165-0.288) |
| Kyrgyzstan                       | 0.037 (0.011-0.083) | 0.047 (0.021-0.086) | 0.058 (0.029-0.099) | 0.070 (0.038-0.113) | 0.095 (0.048-0.154) |
| Lao PDR                          | 0.002 (0.000-0.005) | 0.002 (0.001-0.005) | 0.004 (0.002-0.008) | 0.008 (0.004-0.015) | 0.018 (0.008-0.033) |
| Latvia                           | 0.069 (0.029-0.132) | 0.094 (0.054-0.144) | 0.108 (0.067-0.158) | 0.131 (0.088-0.182) | 0.172 (0.107-0.242) |
| Lebanon                          | 0.066 (0.029-0.122) | 0.096 (0.056-0.146) | 0.126 (0.081-0.180) | 0.158 (0.107-0.215) | 0.179 (0.120-0.244) |
| Lesotho                          | 0.006 (0.001-0.016) | 0.008 (0.003-0.018) | 0.013 (0.005-0.026) | 0.021 (0.010-0.037) | 0.034 (0.015-0.062) |
| Liberia                          | 0.008 (0.002-0.021) | 0.012 (0.004-0.025) | 0.012 (0.004-0.025) | 0.015 (0.007-0.027) | 0.024 (0.010-0.046) |
| Libya                            | 0.062 (0.020-0.126) | 0.106 (0.065-0.157) | 0.130 (0.089-0.178) | 0.153 (0.112-0.200) | 0.174 (0.115-0.236) |
| Lithuania                        | 0.065 (0.029-0.122) | 0.094 (0.059-0.140) | 0.114 (0.078-0.161) | 0.140 (0.100-0.187) | 0.178 (0.118-0.247) |
| Luxembourg                       | 0.066 (0.030-0.114) | 0.093 (0.053-0.141) | 0.127 (0.078-0.184) | 0.159 (0.112-0.213) | 0.185 (0.123-0.254) |
| Macedonia (TFYR)                 | 0.054 (0.021-0.107) | 0.078 (0.043-0.126) | 0.099 (0.059-0.150) | 0.121 (0.078-0.172) | 0.148 (0.091-0.218) |
| Madagascar                       | 0.005 (0.001-0.015) | 0.007 (0.002-0.015) | 0.009 (0.004-0.018) | 0.013 (0.006-0.022) | 0.018 (0.008-0.036) |
| Malawi                           | 0.003 (0.001-0.011) | 0.004 (0.001-0.011) | 0.006 (0.002-0.013) | 0.009 (0.004-0.016) | 0.012 (0.005-0.025) |
| Malaysia                         | 0.007 (0.002-0.018) | 0.014 (0.006-0.026) | 0.028 (0.016-0.045) | 0.054 (0.035-0.078) | 0.083 (0.049-0.127) |
| Maldives                         | 0.003 (0.001-0.009) | 0.006 (0.002-0.013) | 0.011 (0.005-0.022) | 0.024 (0.011-0.045) | 0.047 (0.021-0.084) |
| Mali                             | 0.006 (0.001-0.017) | 0.009 (0.003-0.018) | 0.013 (0.006-0.024) | 0.019 (0.010-0.033) | 0.029 (0.012-0.053) |
| Malta                            | 0.091 (0.035-0.178) | 0.118 (0.072-0.173) | 0.140 (0.094-0.192) | 0.170 (0.122-0.226) | 0.193 (0.126-0.267) |
| Marshall Islands                 | 0.172 (0.085-0.281) | 0.191 (0.118-0.274) | 0.213 (0.145-0.284) | 0.224 (0.158-0.293) | 0.230 (0.145-0.323) |
| Mauritania                       | 0.008 (0.002-0.021) | 0.013 (0.005-0.026) | 0.021 (0.009-0.037) | 0.030 (0.016-0.051) | 0.044 (0.020-0.079) |
| Mauritius                        | 0.014 (0.004-0.033) | 0.021 (0.010-0.039) | 0.036 (0.020-0.059) | 0.059 (0.035-0.091) | 0.087 (0.044-0.143) |
| Mexico                           | 0.056 (0.023-0.105) | 0.085 (0.051-0.127) | 0.117 (0.084-0.155) | 0.148 (0.117-0.183) | 0.174 (0.124-0.228) |
| Micronesia (Federated States of) | 0.127 (0.063-0.219) | 0.150 (0.093-0.220) | 0.173 (0.116-0.240) | 0.194 (0.141-0.254) | 0.208 (0.141-0.288) |
| Moldova                          | 0.039 (0.014-0.083) | 0.056 (0.029-0.096) | 0.067 (0.038-0.108) | 0.076 (0.044-0.117) | 0.105 (0.059-0.164) |
| Mongolia                         | 0.038 (0.011-0.084) | 0.052 (0.024-0.093) | 0.065 (0.035-0.105) | 0.083 (0.051-0.124) | 0.116 (0.068-0.174) |
| Montenegro                       | 0.050 (0.016-0.107) | 0.082 (0.041-0.136) | 0.109 (0.065-0.163) | 0.138 (0.091-0.190) | 0.164 (0.104-0.233) |
| Morocco                          | 0.033 (0.010-0.071) | 0.047 (0.023-0.080) | 0.067 (0.039-0.103) | 0.091 (0.058-0.133) | 0.120 (0.070-0.180) |
| Mozambique                       | 0.003 (0.000-0.010) | 0.004 (0.001-0.010) | 0.006 (0.002-0.012) | 0.009 (0.004-0.017) | 0.014 (0.005-0.027) |
| Myanmar                          | 0.002 (0.000-0.008) | 0.003 (0.001-0.007) | 0.004 (0.001-0.008) | 0.008 (0.004-0.014) | 0.018 (0.008-0.035) |
| Namibia                          | 0.010 (0.002-0.027) | 0.015 (0.006-0.030) | 0.022 (0.010-0.039) | 0.036 (0.020-0.059) | 0.057 (0.029-0.098) |
| Nauru                            | 0.253 (0.161-0.356) | 0.258 (0.191-0.329) | 0.258 (0.198-0.323) | 0.253 (0.187-0.321) | 0.252 (0.161-0.348) |
| Nepal                            | 0.003 (0.001-0.009) | 0.005 (0.002-0.010) | 0.008 (0.003-0.015) | 0.013 (0.006-0.022) | 0.020 (0.009-0.040) |
| Netherlands                      | 0.047 (0.022-0.081) | 0.066 (0.043-0.094) | 0.092 (0.064-0.121) | 0.127 (0.096-0.160) | 0.151 (0.102-0.203) |
| New Zealand                      | 0.087 (0.047-0.137) | 0.110 (0.076-0.150) | 0.136 (0.101-0.174) | 0.164 (0.129-0.200) | 0.191 (0.145-0.240) |
| Nicaragua                        | 0.038 (0.013-0.078) | 0.051 (0.025-0.088) | 0.060 (0.033-0.096) | 0.079 (0.049-0.118) | 0.101 (0.055-0.161) |
| Niger                            | 0.004 (0.001-0.012) | 0.005 (0.002-0.012) | 0.008 (0.003-0.015) | 0.010 (0.005-0.019) | 0.013 (0.005-0.027) |
| Nigeria                          | 0.006 (0.001-0.015) | 0.009 (0.004-0.018) | 0.014 (0.008-0.023) | 0.022 (0.014-0.034) | 0.038 (0.020-0.061) |
| Niue                             | 0.135 (0.061-0.238) | 0.173 (0.104-0.259) | 0.209 (0.144-0.286) | 0.241 (0.180-0.310) | 0.265 (0.187-0.348) |
| North Korea                      | 0.007 (0.002-0.019) | 0.011 (0.004-0.022) | 0.014 (0.006-0.027) | 0.015 (0.006-0.031) | 0.019 (0.005-0.045) |
| Norway                           | 0.053 (0.027-0.093) | 0.082 (0.055-0.116) | 0.112 (0.081-0.147) | 0.148 (0.114-0.186) | 0.174 (0.120-0.233) |

|                                  |                     |                     |                     |                     |                     |
|----------------------------------|---------------------|---------------------|---------------------|---------------------|---------------------|
| Occupied Palestinian Territory   | 0.064 (0.025-0.126) | 0.083 (0.046-0.133) | 0.099 (0.062-0.146) | 0.122 (0.084-0.170) | 0.136 (0.080-0.207) |
| Oman                             | 0.035 (0.011-0.077) | 0.065 (0.036-0.101) | 0.105 (0.069-0.143) | 0.140 (0.100-0.181) | 0.173 (0.114-0.235) |
| Pakistan                         | 0.006 (0.002-0.015) | 0.010 (0.004-0.019) | 0.016 (0.008-0.029) | 0.025 (0.013-0.042) | 0.037 (0.017-0.067) |
| Palau                            | 0.186 (0.096-0.294) | 0.210 (0.141-0.287) | 0.232 (0.166-0.303) | 0.247 (0.183-0.314) | 0.255 (0.177-0.336) |
| Panama                           | 0.041 (0.015-0.084) | 0.061 (0.031-0.099) | 0.083 (0.050-0.123) | 0.112 (0.075-0.154) | 0.147 (0.093-0.208) |
| Papua New Guinea                 | 0.050 (0.013-0.116) | 0.062 (0.024-0.119) | 0.079 (0.036-0.137) | 0.095 (0.049-0.153) | 0.117 (0.057-0.192) |
| Paraguay                         | 0.029 (0.008-0.064) | 0.043 (0.020-0.078) | 0.068 (0.037-0.110) | 0.096 (0.058-0.143) | 0.123 (0.072-0.186) |
| Peru                             | 0.039 (0.014-0.080) | 0.057 (0.028-0.094) | 0.074 (0.043-0.115) | 0.094 (0.062-0.134) | 0.124 (0.077-0.180) |
| Philippines                      | 0.006 (0.001-0.014) | 0.009 (0.004-0.016) | 0.014 (0.007-0.023) | 0.021 (0.012-0.034) | 0.034 (0.017-0.061) |
| Poland                           | 0.076 (0.036-0.131) | 0.100 (0.069-0.139) | 0.120 (0.088-0.156) | 0.149 (0.117-0.183) | 0.180 (0.129-0.236) |
| Portugal                         | 0.037 (0.015-0.072) | 0.055 (0.032-0.084) | 0.086 (0.060-0.118) | 0.128 (0.095-0.166) | 0.160 (0.104-0.221) |
| Puerto Rico                      | 0.051 (0.020-0.098) | 0.084 (0.048-0.131) | 0.126 (0.082-0.180) | 0.158 (0.113-0.212) | 0.178 (0.116-0.247) |
| Qatar                            | 0.086 (0.037-0.153) | 0.132 (0.077-0.195) | 0.161 (0.111-0.215) | 0.198 (0.147-0.253) | 0.223 (0.155-0.292) |
| Romania                          | 0.055 (0.022-0.106) | 0.085 (0.050-0.130) | 0.107 (0.068-0.150) | 0.133 (0.090-0.178) | 0.170 (0.108-0.238) |
| Russian Federation               | 0.058 (0.029-0.102) | 0.080 (0.057-0.108) | 0.096 (0.075-0.119) | 0.117 (0.091-0.145) | 0.156 (0.106-0.216) |
| Rwanda                           | 0.001 (0.000-0.005) | 0.002 (0.000-0.006) | 0.003 (0.001-0.008) | 0.005 (0.002-0.011) | 0.009 (0.003-0.020) |
| Saint Kitts and Nevis            | 0.031 (0.011-0.067) | 0.048 (0.023-0.085) | 0.074 (0.042-0.116) | 0.107 (0.067-0.156) | 0.135 (0.073-0.211) |
| Saint Lucia                      | 0.022 (0.007-0.050) | 0.033 (0.017-0.058) | 0.056 (0.033-0.088) | 0.088 (0.055-0.131) | 0.123 (0.066-0.198) |
| Saint Vincent and the Grenadines | 0.023 (0.007-0.053) | 0.035 (0.016-0.064) | 0.056 (0.031-0.092) | 0.088 (0.054-0.131) | 0.120 (0.068-0.186) |
| Samoa                            | 0.119 (0.055-0.209) | 0.142 (0.085-0.212) | 0.176 (0.118-0.241) | 0.204 (0.148-0.266) | 0.219 (0.147-0.299) |
| Sao Tome and Principe            | 0.008 (0.002-0.022) | 0.012 (0.005-0.025) | 0.018 (0.008-0.034) | 0.026 (0.014-0.044) | 0.038 (0.018-0.068) |
| Saudi Arabia                     | 0.058 (0.020-0.118) | 0.102 (0.066-0.147) | 0.139 (0.105-0.177) | 0.167 (0.131-0.207) | 0.195 (0.139-0.258) |
| Senegal                          | 0.009 (0.002-0.022) | 0.012 (0.004-0.023) | 0.016 (0.007-0.028) | 0.022 (0.011-0.037) | 0.030 (0.014-0.055) |
| Serbia                           | 0.052 (0.021-0.099) | 0.078 (0.048-0.118) | 0.101 (0.068-0.141) | 0.124 (0.090-0.163) | 0.147 (0.098-0.201) |
| Seychelles                       | 0.017 (0.005-0.039) | 0.030 (0.014-0.055) | 0.048 (0.026-0.080) | 0.075 (0.044-0.115) | 0.104 (0.054-0.167) |
| Sierra Leone                     | 0.007 (0.001-0.019) | 0.010 (0.003-0.020) | 0.012 (0.005-0.022) | 0.015 (0.008-0.025) | 0.022 (0.010-0.040) |
| Singapore                        | 0.007 (0.002-0.018) | 0.014 (0.007-0.025) | 0.025 (0.014-0.038) | 0.037 (0.023-0.055) | 0.055 (0.032-0.087) |
| Slovakia                         | 0.061 (0.026-0.113) | 0.089 (0.056-0.133) | 0.117 (0.080-0.158) | 0.143 (0.106-0.186) | 0.179 (0.122-0.245) |
| Slovenia                         | 0.052 (0.019-0.103) | 0.082 (0.046-0.130) | 0.110 (0.070-0.159) | 0.143 (0.097-0.194) | 0.172 (0.108-0.243) |
| Solomon Islands                  | 0.038 (0.009-0.097) | 0.053 (0.019-0.106) | 0.068 (0.030-0.121) | 0.080 (0.042-0.128) | 0.097 (0.048-0.162) |
| Somalia                          | 0.007 (0.001-0.021) | 0.009 (0.003-0.021) | 0.011 (0.004-0.023) | 0.014 (0.005-0.027) | 0.018 (0.006-0.037) |
| South Africa                     | 0.026 (0.009-0.054) | 0.036 (0.019-0.059) | 0.050 (0.031-0.074) | 0.070 (0.049-0.095) | 0.098 (0.064-0.138) |
| South Korea                      | 0.001 (0.000-0.003) | 0.005 (0.003-0.010) | 0.015 (0.008-0.024) | 0.025 (0.016-0.036) | 0.043 (0.025-0.068) |
| Spain                            | 0.064 (0.031-0.110) | 0.092 (0.065-0.125) | 0.124 (0.097-0.154) | 0.158 (0.129-0.190) | 0.182 (0.129-0.240) |
| Sri Lanka                        | 0.003 (0.001-0.007) | 0.004 (0.001-0.008) | 0.007 (0.003-0.012) | 0.013 (0.007-0.022) | 0.027 (0.011-0.052) |
| Sudan                            | 0.007 (0.001-0.019) | 0.010 (0.004-0.021) | 0.015 (0.006-0.029) | 0.024 (0.012-0.042) | 0.037 (0.016-0.068) |
| Suriname                         | 0.039 (0.014-0.082) | 0.064 (0.033-0.106) | 0.080 (0.046-0.124) | 0.105 (0.066-0.152) | 0.135 (0.080-0.201) |
| Swaziland                        | 0.008 (0.002-0.021) | 0.013 (0.005-0.028) | 0.022 (0.010-0.042) | 0.036 (0.019-0.060) | 0.052 (0.024-0.094) |
| Sweden                           | 0.066 (0.038-0.103) | 0.085 (0.062-0.111) | 0.108 (0.084-0.134) | 0.138 (0.111-0.167) | 0.163 (0.115-0.216) |
| Switzerland                      | 0.056 (0.025-0.102) | 0.082 (0.052-0.122) | 0.118 (0.084-0.157) | 0.143 (0.108-0.179) | 0.165 (0.114-0.219) |
| Syrian Arab Republic             | 0.041 (0.015-0.085) | 0.066 (0.035-0.107) | 0.084 (0.051-0.126) | 0.109 (0.072-0.152) | 0.129 (0.078-0.190) |
| Taiwan                           | 0.006 (0.002-0.014) | 0.014 (0.007-0.026) | 0.031 (0.018-0.048) | 0.054 (0.032-0.080) | 0.077 (0.039-0.125) |
| Tajikistan                       | 0.036 (0.011-0.080) | 0.045 (0.019-0.085) | 0.050 (0.023-0.088) | 0.053 (0.025-0.092) | 0.076 (0.035-0.136) |
| Tanzania                         | 0.005 (0.001-0.013) | 0.006 (0.002-0.014) | 0.009 (0.004-0.017) | 0.014 (0.007-0.024) | 0.022 (0.010-0.041) |
| Thailand                         | 0.005 (0.001-0.011) | 0.007 (0.003-0.014) | 0.014 (0.008-0.023) | 0.027 (0.017-0.042) | 0.049 (0.026-0.084) |
| Timor-Leste                      | 0.001 (0.000-0.004) | 0.002 (0.001-0.004) | 0.003 (0.001-0.006) | 0.005 (0.002-0.010) | 0.009 (0.003-0.020) |
| Togo                             | 0.005 (0.001-0.014) | 0.007 (0.002-0.015) | 0.011 (0.005-0.020) | 0.015 (0.008-0.026) | 0.022 (0.009-0.041) |
| Tokelau                          | 0.115 (0.034-0.244) | 0.144 (0.067-0.246) | 0.178 (0.108-0.262) | 0.211 (0.142-0.286) | 0.233 (0.144-0.330) |
| Tonga                            | 0.135 (0.062-0.236) | 0.162 (0.097-0.239) | 0.191 (0.125-0.263) | 0.216 (0.155-0.281) | 0.230 (0.156-0.312) |
| Trinidad and Tobago              | 0.029 (0.006-0.075) | 0.046 (0.018-0.092) | 0.062 (0.033-0.105) | 0.100 (0.057-0.156) | 0.144 (0.067-0.243) |
| Tunisia                          | 0.038 (0.014-0.079) | 0.057 (0.031-0.091) | 0.080 (0.050-0.116) | 0.108 (0.074-0.144) | 0.136 (0.088-0.193) |
| Turkey                           | 0.049 (0.021-0.094) | 0.075 (0.048-0.110) | 0.111 (0.082-0.145) | 0.146 (0.117-0.178) | 0.176 (0.130-0.226) |
| Turkmenistan                     | 0.044 (0.015-0.095) | 0.056 (0.026-0.097) | 0.073 (0.039-0.118) | 0.091 (0.052-0.139) | 0.132 (0.076-0.199) |
| Tuvalu                           | 0.124 (0.057-0.219) | 0.152 (0.090-0.228) | 0.188 (0.125-0.260) | 0.211 (0.148-0.278) | 0.224 (0.145-0.310) |
| Uganda                           | 0.002 (0.000-0.008) | 0.003 (0.001-0.008) | 0.004 (0.001-0.009) | 0.007 (0.003-0.014) | 0.012 (0.005-0.026) |
| Ukraine                          | 0.060 (0.024-0.118) | 0.082 (0.046-0.132) | 0.098 (0.059-0.148) | 0.109 (0.068-0.161) | 0.140 (0.082-0.210) |
| United Arab Emirates             | 0.109 (0.039-0.208) | 0.138 (0.082-0.204) | 0.163 (0.114-0.218) | 0.195 (0.145-0.247) | 0.204 (0.139-0.274) |
| United Kingdom                   | 0.080 (0.044-0.124) | 0.097 (0.073-0.124) | 0.123 (0.102-0.145) | 0.158 (0.136-0.181) | 0.189 (0.149-0.230) |
| United States of America         | 0.092 (0.057-0.137) | 0.117 (0.088-0.150) | 0.150 (0.118-0.184) | 0.183 (0.153-0.217) | 0.204 (0.156-0.253) |
| Uruguay                          | 0.085 (0.033-0.159) | 0.102 (0.057-0.158) | 0.122 (0.079-0.174) | 0.149 (0.104-0.201) | 0.178 (0.116-0.249) |
| Uzbekistan                       | 0.039 (0.012-0.088) | 0.051 (0.021-0.095) | 0.062 (0.030-0.107) | 0.073 (0.040-0.118) | 0.103 (0.052-0.170) |
| Vanuatu                          | 0.058 (0.017-0.131) | 0.072 (0.030-0.132) | 0.089 (0.043-0.145) | 0.109 (0.061-0.163) | 0.130 (0.069-0.200) |
| Venezuela                        | 0.063 (0.026-0.117) | 0.091 (0.052-0.138) | 0.114 (0.075-0.161) | 0.136 (0.098-0.179) | 0.163 (0.108-0.226) |
| Viet Nam                         | 0.001 (0.000-0.004) | 0.002 (0.001-0.003) | 0.003 (0.001-0.005) | 0.006 (0.003-0.011) | 0.016 (0.007-0.030) |
| Yemen                            | 0.020 (0.005-0.048) | 0.028 (0.012-0.053) | 0.041 (0.021-0.069) | 0.058 (0.032-0.090) | 0.075 (0.036-0.125) |
| Zambia                           | 0.009 (0.002-0.023) | 0.013 (0.005-0.026) | 0.016 (0.007-0.029) | 0.020 (0.010-0.034) | 0.030 (0.013-0.056) |
| Zimbabwe                         | 0.008 (0.002-0.021) | 0.012 (0.005-0.024) | 0.018 (0.009-0.031) | 0.025 (0.013-0.041) | 0.030 (0.013-0.056) |

**Women, 30 ≤ BMI < 35 kg/m<sup>2</sup>**

| Country                  | Year                |                     |                     |                     |                     |
|--------------------------|---------------------|---------------------|---------------------|---------------------|---------------------|
|                          | 1975                | 1985                | 1995                | 2005                | 2014                |
| Afghanistan              | 0.008 (0.002-0.019) | 0.012 (0.005-0.024) | 0.017 (0.008-0.031) | 0.024 (0.012-0.043) | 0.041 (0.020-0.073) |
| Albania                  | 0.093 (0.036-0.177) | 0.099 (0.053-0.159) | 0.098 (0.060-0.146) | 0.111 (0.073-0.157) | 0.122 (0.071-0.183) |
| Algeria                  | 0.100 (0.044-0.182) | 0.129 (0.079-0.190) | 0.152 (0.107-0.203) | 0.178 (0.131-0.227) | 0.195 (0.134-0.263) |
| American Samoa           | 0.229 (0.146-0.321) | 0.240 (0.174-0.310) | 0.247 (0.186-0.313) | 0.250 (0.187-0.317) | 0.249 (0.169-0.340) |
| Andorra                  | 0.126 (0.064-0.210) | 0.140 (0.089-0.204) | 0.149 (0.101-0.205) | 0.166 (0.116-0.222) | 0.170 (0.107-0.242) |
| Angola                   | 0.019 (0.004-0.050) | 0.027 (0.009-0.055) | 0.038 (0.017-0.068) | 0.058 (0.029-0.097) | 0.088 (0.042-0.150) |
| Antigua and Barbuda      | 0.092 (0.037-0.173) | 0.119 (0.066-0.185) | 0.147 (0.094-0.212) | 0.165 (0.109-0.231) | 0.178 (0.102-0.270) |
| Argentina                | 0.102 (0.047-0.180) | 0.118 (0.071-0.176) | 0.137 (0.094-0.186) | 0.155 (0.115-0.201) | 0.176 (0.117-0.240) |
| Armenia                  | 0.075 (0.023-0.160) | 0.091 (0.044-0.155) | 0.098 (0.058-0.147) | 0.118 (0.078-0.166) | 0.138 (0.082-0.209) |
| Australia                | 0.075 (0.044-0.115) | 0.093 (0.068-0.120) | 0.114 (0.089-0.141) | 0.139 (0.112-0.169) | 0.159 (0.117-0.207) |
| Austria                  | 0.057 (0.028-0.097) | 0.069 (0.044-0.101) | 0.084 (0.057-0.115) | 0.105 (0.074-0.141) | 0.122 (0.076-0.179) |
| Azerbaijan               | 0.087 (0.031-0.175) | 0.105 (0.053-0.171) | 0.107 (0.064-0.158) | 0.122 (0.078-0.173) | 0.154 (0.092-0.229) |
| Bahamas                  | 0.131 (0.062-0.223) | 0.154 (0.093-0.225) | 0.172 (0.117-0.236) | 0.188 (0.132-0.250) | 0.193 (0.125-0.271) |
| Bahrain                  | 0.190 (0.099-0.296) | 0.195 (0.131-0.265) | 0.212 (0.157-0.268) | 0.226 (0.173-0.280) | 0.232 (0.162-0.306) |
| Bangladesh               | 0.006 (0.001-0.014) | 0.009 (0.004-0.017) | 0.015 (0.008-0.024) | 0.025 (0.015-0.038) | 0.041 (0.022-0.067) |
| Barbados                 | 0.085 (0.035-0.156) | 0.109 (0.064-0.167) | 0.131 (0.087-0.183) | 0.156 (0.109-0.212) | 0.171 (0.104-0.252) |
| Belarus                  | 0.110 (0.045-0.206) | 0.125 (0.071-0.194) | 0.132 (0.084-0.190) | 0.140 (0.092-0.197) | 0.150 (0.089-0.223) |
| Belgium                  | 0.085 (0.043-0.140) | 0.099 (0.069-0.134) | 0.117 (0.090-0.147) | 0.135 (0.105-0.171) | 0.147 (0.101-0.202) |
| Belize                   | 0.069 (0.025-0.139) | 0.090 (0.048-0.143) | 0.116 (0.074-0.167) | 0.142 (0.097-0.193) | 0.156 (0.096-0.227) |
| Benin                    | 0.014 (0.004-0.034) | 0.023 (0.011-0.042) | 0.038 (0.022-0.059) | 0.061 (0.041-0.086) | 0.086 (0.054-0.126) |
| Bermuda                  | 0.172 (0.081-0.282) | 0.186 (0.110-0.269) | 0.198 (0.130-0.269) | 0.210 (0.148-0.277) | 0.219 (0.144-0.306) |
| Bhutan                   | 0.007 (0.001-0.018) | 0.012 (0.005-0.025) | 0.025 (0.012-0.044) | 0.044 (0.025-0.070) | 0.066 (0.036-0.109) |
| Bolivia                  | 0.063 (0.021-0.128) | 0.081 (0.041-0.134) | 0.105 (0.065-0.155) | 0.133 (0.091-0.181) | 0.157 (0.100-0.227) |
| Bosnia and Herzegovina   | 0.056 (0.014-0.141) | 0.067 (0.027-0.128) | 0.082 (0.044-0.131) | 0.119 (0.076-0.171) | 0.115 (0.067-0.169) |
| Botswana                 | 0.033 (0.008-0.083) | 0.065 (0.029-0.119) | 0.111 (0.065-0.170) | 0.144 (0.093-0.202) | 0.172 (0.107-0.248) |
| Brazil                   | 0.062 (0.026-0.115) | 0.089 (0.057-0.129) | 0.111 (0.084-0.142) | 0.131 (0.105-0.160) | 0.151 (0.108-0.200) |
| Brunei Darussalam        | 0.067 (0.017-0.155) | 0.082 (0.034-0.151) | 0.095 (0.053-0.152) | 0.113 (0.069-0.170) | 0.123 (0.066-0.199) |
| Bulgaria                 | 0.116 (0.052-0.207) | 0.125 (0.073-0.189) | 0.127 (0.082-0.180) | 0.136 (0.092-0.189) | 0.144 (0.087-0.212) |
| Burkina Faso             | 0.007 (0.001-0.018) | 0.011 (0.004-0.022) | 0.021 (0.011-0.033) | 0.039 (0.024-0.057) | 0.060 (0.034-0.092) |
| Burundi                  | 0.004 (0.000-0.014) | 0.008 (0.002-0.019) | 0.014 (0.005-0.028) | 0.024 (0.012-0.043) | 0.042 (0.020-0.073) |
| Cabo Verde               | 0.011 (0.003-0.030) | 0.023 (0.010-0.043) | 0.044 (0.024-0.072) | 0.081 (0.052-0.118) | 0.111 (0.066-0.167) |
| Cambodia                 | 0.002 (0.000-0.007) | 0.005 (0.001-0.010) | 0.009 (0.004-0.017) | 0.018 (0.010-0.029) | 0.034 (0.017-0.058) |
| Cameroon                 | 0.019 (0.006-0.045) | 0.035 (0.017-0.060) | 0.049 (0.031-0.072) | 0.073 (0.052-0.100) | 0.101 (0.064-0.146) |
| Canada                   | 0.077 (0.043-0.120) | 0.103 (0.073-0.138) | 0.128 (0.096-0.163) | 0.152 (0.118-0.190) | 0.168 (0.118-0.221) |
| Central African Republic | 0.013 (0.003-0.034) | 0.018 (0.006-0.038) | 0.026 (0.012-0.047) | 0.038 (0.020-0.065) | 0.057 (0.026-0.100) |
| Chad                     | 0.011 (0.002-0.027) | 0.016 (0.006-0.031) | 0.027 (0.014-0.044) | 0.047 (0.028-0.070) | 0.071 (0.039-0.112) |
| Chile                    | 0.103 (0.044-0.186) | 0.128 (0.076-0.191) | 0.155 (0.111-0.205) | 0.178 (0.136-0.222) | 0.194 (0.137-0.257) |
| China                    | 0.008 (0.002-0.019) | 0.013 (0.008-0.020) | 0.024 (0.018-0.031) | 0.045 (0.034-0.058) | 0.069 (0.042-0.102) |
| China (Hong Kong SAR)    | 0.056 (0.015-0.130) | 0.065 (0.029-0.115) | 0.073 (0.040-0.115) | 0.073 (0.039-0.116) | 0.073 (0.030-0.136) |
| Colombia                 | 0.079 (0.030-0.150) | 0.103 (0.060-0.157) | 0.127 (0.089-0.169) | 0.149 (0.115-0.186) | 0.169 (0.119-0.225) |
| Comoros                  | 0.019 (0.005-0.045) | 0.026 (0.011-0.047) | 0.038 (0.021-0.061) | 0.056 (0.035-0.084) | 0.080 (0.047-0.123) |
| Congo                    | 0.023 (0.007-0.053) | 0.040 (0.019-0.069) | 0.057 (0.033-0.088) | 0.075 (0.047-0.110) | 0.097 (0.055-0.152) |
| Cook Islands             | 0.196 (0.105-0.304) | 0.233 (0.161-0.313) | 0.254 (0.183-0.329) | 0.262 (0.193-0.333) | 0.263 (0.181-0.351) |
| Costa Rica               | 0.073 (0.026-0.145) | 0.096 (0.051-0.152) | 0.125 (0.082-0.176) | 0.155 (0.112-0.203) | 0.178 (0.121-0.244) |
| Cote d'Ivoire            | 0.027 (0.008-0.061) | 0.038 (0.018-0.066) | 0.051 (0.031-0.077) | 0.073 (0.049-0.102) | 0.096 (0.060-0.141) |
| Croatia                  | 0.096 (0.041-0.180) | 0.114 (0.067-0.174) | 0.121 (0.079-0.172) | 0.131 (0.089-0.182) | 0.135 (0.080-0.202) |
| Cuba                     | 0.090 (0.040-0.159) | 0.122 (0.074-0.180) | 0.138 (0.093-0.188) | 0.155 (0.112-0.203) | 0.173 (0.114-0.239) |
| Cyprus                   | 0.057 (0.022-0.113) | 0.097 (0.054-0.150) | 0.126 (0.082-0.179) | 0.146 (0.099-0.201) | 0.156 (0.094-0.227) |
| Czech Republic           | 0.142 (0.073-0.233) | 0.151 (0.100-0.211) | 0.150 (0.107-0.199) | 0.150 (0.109-0.199) | 0.149 (0.092-0.213) |
| Denmark                  | 0.064 (0.031-0.107) | 0.080 (0.051-0.115) | 0.093 (0.063-0.127) | 0.104 (0.071-0.140) | 0.118 (0.073-0.169) |
| Djibouti                 | 0.033 (0.008-0.077) | 0.038 (0.013-0.077) | 0.056 (0.028-0.094) | 0.072 (0.039-0.114) | 0.095 (0.048-0.158) |
| Dominica                 | 0.079 (0.033-0.148) | 0.102 (0.058-0.159) | 0.132 (0.086-0.184) | 0.152 (0.105-0.205) | 0.170 (0.108-0.239) |
| Dominican Republic       | 0.058 (0.023-0.112) | 0.087 (0.051-0.133) | 0.111 (0.075-0.152) | 0.144 (0.104-0.188) | 0.166 (0.109-0.230) |
| DR Congo                 | 0.014 (0.003-0.036) | 0.019 (0.007-0.039) | 0.027 (0.013-0.047) | 0.036 (0.019-0.059) | 0.054 (0.027-0.094) |
| Ecuador                  | 0.065 (0.021-0.135) | 0.092 (0.046-0.152) | 0.119 (0.073-0.174) | 0.142 (0.096-0.195) | 0.164 (0.105-0.234) |
| Egypt                    | 0.116 (0.050-0.202) | 0.151 (0.100-0.211) | 0.179 (0.137-0.225) | 0.203 (0.164-0.247) | 0.218 (0.159-0.278) |
| El Salvador              | 0.080 (0.031-0.158) | 0.099 (0.055-0.158) | 0.126 (0.084-0.177) | 0.157 (0.115-0.207) | 0.177 (0.117-0.246) |
| Equatorial Guinea        | 0.013 (0.003-0.036) | 0.022 (0.008-0.044) | 0.036 (0.017-0.064) | 0.096 (0.051-0.151) | 0.127 (0.059-0.212) |
| Eritrea                  | 0.008 (0.002-0.021) | 0.012 (0.005-0.023) | 0.021 (0.011-0.034) | 0.037 (0.021-0.055) | 0.055 (0.029-0.089) |
| Estonia                  | 0.137 (0.066-0.229) | 0.141 (0.092-0.203) | 0.136 (0.098-0.179) | 0.135 (0.106-0.169) | 0.132 (0.091-0.183) |
| Ethiopia                 | 0.007 (0.001-0.019) | 0.011 (0.004-0.021) | 0.017 (0.008-0.029) | 0.028 (0.016-0.044) | 0.049 (0.025-0.080) |
| Fiji                     | 0.127 (0.047-0.244) | 0.153 (0.078-0.245) | 0.176 (0.109-0.251) | 0.198 (0.138-0.266) | 0.211 (0.142-0.289) |
| Finland                  | 0.054 (0.027-0.090) | 0.075 (0.052-0.103) | 0.099 (0.075-0.126) | 0.122 (0.095-0.151) | 0.135 (0.094-0.180) |
| France                   | 0.077 (0.036-0.135) | 0.090 (0.057-0.132) | 0.106 (0.073-0.146) | 0.125 (0.089-0.165) | 0.140 (0.089-0.197) |
| French Polynesia         | 0.226 (0.125-0.343) | 0.243 (0.156-0.337) | 0.251 (0.176-0.334) | 0.253 (0.184-0.326) | 0.251 (0.171-0.335) |
| Gabon                    | 0.041 (0.010-0.098) | 0.068 (0.030-0.118) | 0.090 (0.050-0.138) | 0.117 (0.073-0.169) | 0.133 (0.077-0.199) |
| Gambia                   | 0.015 (0.004-0.036) | 0.025 (0.011-0.046) | 0.041 (0.023-0.066) | 0.067 (0.043-0.096) | 0.091 (0.054-0.138) |
| Georgia                  | 0.079 (0.027-0.164) | 0.104 (0.052-0.174) | 0.101 (0.057-0.155) | 0.115 (0.072-0.166) | 0.134 (0.079-0.200) |

|                                  |                     |                     |                     |                     |                     |
|----------------------------------|---------------------|---------------------|---------------------|---------------------|---------------------|
| Germany                          | 0.068 (0.037-0.110) | 0.084 (0.062-0.109) | 0.102 (0.080-0.125) | 0.123 (0.097-0.151) | 0.138 (0.095-0.188) |
| Ghana                            | 0.024 (0.007-0.053) | 0.033 (0.017-0.056) | 0.052 (0.033-0.077) | 0.081 (0.056-0.110) | 0.112 (0.071-0.160) |
| Greece                           | 0.096 (0.045-0.166) | 0.116 (0.072-0.169) | 0.131 (0.089-0.179) | 0.148 (0.105-0.197) | 0.155 (0.098-0.222) |
| Greenland                        | 0.072 (0.035-0.126) | 0.093 (0.058-0.136) | 0.108 (0.074-0.148) | 0.128 (0.092-0.171) | 0.144 (0.094-0.204) |
| Grenada                          | 0.064 (0.024-0.126) | 0.090 (0.049-0.143) | 0.121 (0.078-0.172) | 0.150 (0.102-0.203) | 0.168 (0.104-0.245) |
| Guatemala                        | 0.069 (0.025-0.139) | 0.090 (0.049-0.145) | 0.112 (0.075-0.158) | 0.141 (0.101-0.186) | 0.163 (0.105-0.228) |
| Guinea                           | 0.010 (0.002-0.027) | 0.019 (0.008-0.036) | 0.031 (0.016-0.051) | 0.049 (0.030-0.071) | 0.069 (0.041-0.107) |
| Guinea Bissau                    | 0.012 (0.003-0.031) | 0.021 (0.009-0.040) | 0.037 (0.019-0.062) | 0.054 (0.033-0.081) | 0.073 (0.042-0.115) |
| Guyana                           | 0.070 (0.027-0.135) | 0.092 (0.050-0.147) | 0.116 (0.073-0.169) | 0.148 (0.097-0.203) | 0.166 (0.102-0.240) |
| Haiti                            | 0.035 (0.011-0.076) | 0.050 (0.025-0.087) | 0.068 (0.041-0.104) | 0.091 (0.059-0.131) | 0.114 (0.064-0.175) |
| Honduras                         | 0.055 (0.017-0.114) | 0.078 (0.039-0.127) | 0.103 (0.065-0.148) | 0.131 (0.093-0.174) | 0.157 (0.104-0.219) |
| Hungary                          | 0.125 (0.062-0.209) | 0.133 (0.086-0.188) | 0.128 (0.088-0.175) | 0.133 (0.092-0.181) | 0.137 (0.081-0.202) |
| Iceland                          | 0.066 (0.031-0.116) | 0.091 (0.057-0.135) | 0.105 (0.071-0.145) | 0.122 (0.083-0.166) | 0.134 (0.083-0.196) |
| India                            | 0.005 (0.002-0.012) | 0.010 (0.005-0.016) | 0.017 (0.011-0.023) | 0.027 (0.020-0.036) | 0.042 (0.026-0.061) |
| Indonesia                        | 0.006 (0.001-0.014) | 0.012 (0.005-0.022) | 0.024 (0.015-0.037) | 0.042 (0.029-0.060) | 0.064 (0.039-0.099) |
| Iran                             | 0.112 (0.051-0.196) | 0.136 (0.091-0.187) | 0.157 (0.125-0.194) | 0.184 (0.157-0.212) | 0.204 (0.157-0.256) |
| Iraq                             | 0.126 (0.058-0.216) | 0.154 (0.097-0.219) | 0.167 (0.116-0.222) | 0.192 (0.140-0.247) | 0.212 (0.144-0.288) |
| Ireland                          | 0.044 (0.019-0.080) | 0.066 (0.039-0.100) | 0.095 (0.064-0.131) | 0.128 (0.093-0.171) | 0.154 (0.102-0.214) |
| Israel                           | 0.115 (0.055-0.195) | 0.135 (0.086-0.192) | 0.154 (0.109-0.205) | 0.165 (0.121-0.216) | 0.175 (0.114-0.243) |
| Italy                            | 0.086 (0.046-0.144) | 0.103 (0.075-0.137) | 0.119 (0.094-0.147) | 0.136 (0.107-0.167) | 0.147 (0.100-0.199) |
| Jamaica                          | 0.095 (0.042-0.170) | 0.112 (0.070-0.164) | 0.139 (0.100-0.184) | 0.162 (0.121-0.207) | 0.178 (0.119-0.246) |
| Japan                            | 0.015 (0.008-0.024) | 0.017 (0.012-0.023) | 0.020 (0.015-0.026) | 0.024 (0.017-0.031) | 0.028 (0.019-0.041) |
| Jordan                           | 0.121 (0.053-0.213) | 0.168 (0.116-0.229) | 0.192 (0.147-0.242) | 0.211 (0.170-0.255) | 0.222 (0.161-0.285) |
| Kazakhstan                       | 0.079 (0.028-0.161) | 0.098 (0.049-0.160) | 0.112 (0.067-0.166) | 0.128 (0.082-0.181) | 0.142 (0.081-0.216) |
| Kenya                            | 0.010 (0.002-0.026) | 0.019 (0.008-0.035) | 0.031 (0.017-0.050) | 0.051 (0.031-0.077) | 0.079 (0.044-0.124) |
| Kiribati                         | 0.179 (0.093-0.284) | 0.196 (0.124-0.273) | 0.216 (0.147-0.290) | 0.236 (0.166-0.309) | 0.241 (0.155-0.333) |
| Kuwait                           | 0.225 (0.120-0.341) | 0.221 (0.156-0.293) | 0.231 (0.181-0.286) | 0.240 (0.192-0.292) | 0.245 (0.181-0.317) |
| Kyrgyzstan                       | 0.050 (0.015-0.113) | 0.063 (0.029-0.114) | 0.076 (0.044-0.118) | 0.089 (0.056-0.129) | 0.109 (0.063-0.166) |
| Lao PDR                          | 0.004 (0.001-0.012) | 0.007 (0.002-0.014) | 0.011 (0.006-0.021) | 0.023 (0.013-0.038) | 0.041 (0.022-0.068) |
| Latvia                           | 0.141 (0.063-0.245) | 0.154 (0.093-0.226) | 0.148 (0.097-0.205) | 0.150 (0.102-0.204) | 0.148 (0.088-0.220) |
| Lebanon                          | 0.128 (0.063-0.216) | 0.155 (0.099-0.220) | 0.176 (0.121-0.233) | 0.197 (0.140-0.258) | 0.212 (0.144-0.281) |
| Lesotho                          | 0.036 (0.009-0.091) | 0.056 (0.025-0.102) | 0.086 (0.050-0.133) | 0.121 (0.079-0.171) | 0.152 (0.095-0.223) |
| Liberia                          | 0.020 (0.005-0.046) | 0.030 (0.014-0.056) | 0.030 (0.013-0.055) | 0.048 (0.028-0.072) | 0.074 (0.043-0.114) |
| Libya                            | 0.172 (0.078-0.289) | 0.196 (0.129-0.268) | 0.203 (0.150-0.261) | 0.214 (0.164-0.269) | 0.220 (0.154-0.291) |
| Lithuania                        | 0.145 (0.071-0.244) | 0.161 (0.105-0.226) | 0.159 (0.113-0.212) | 0.159 (0.115-0.211) | 0.163 (0.102-0.235) |
| Luxembourg                       | 0.059 (0.026-0.107) | 0.071 (0.039-0.111) | 0.089 (0.052-0.134) | 0.115 (0.076-0.159) | 0.131 (0.079-0.192) |
| Macedonia (TFYR)                 | 0.114 (0.050-0.202) | 0.122 (0.072-0.187) | 0.127 (0.081-0.179) | 0.126 (0.082-0.176) | 0.128 (0.074-0.193) |
| Madagascar                       | 0.011 (0.002-0.028) | 0.015 (0.006-0.029) | 0.023 (0.012-0.038) | 0.037 (0.021-0.056) | 0.058 (0.030-0.095) |
| Malawi                           | 0.008 (0.002-0.022) | 0.014 (0.005-0.028) | 0.022 (0.012-0.037) | 0.039 (0.024-0.058) | 0.063 (0.035-0.100) |
| Malaysia                         | 0.017 (0.005-0.039) | 0.032 (0.016-0.057) | 0.055 (0.034-0.083) | 0.084 (0.059-0.114) | 0.111 (0.071-0.162) |
| Maldives                         | 0.008 (0.002-0.021) | 0.018 (0.007-0.035) | 0.034 (0.017-0.058) | 0.060 (0.033-0.095) | 0.082 (0.045-0.130) |
| Mali                             | 0.011 (0.003-0.029) | 0.019 (0.008-0.036) | 0.031 (0.017-0.050) | 0.052 (0.033-0.076) | 0.074 (0.043-0.115) |
| Malta                            | 0.097 (0.035-0.191) | 0.125 (0.075-0.189) | 0.143 (0.097-0.201) | 0.163 (0.113-0.219) | 0.173 (0.108-0.248) |
| Marshall Islands                 | 0.196 (0.099-0.309) | 0.218 (0.141-0.304) | 0.240 (0.171-0.313) | 0.246 (0.182-0.319) | 0.249 (0.164-0.337) |
| Mauritania                       | 0.016 (0.004-0.040) | 0.027 (0.012-0.052) | 0.045 (0.024-0.074) | 0.067 (0.041-0.102) | 0.092 (0.052-0.144) |
| Mauritius                        | 0.033 (0.011-0.069) | 0.050 (0.026-0.083) | 0.077 (0.049-0.114) | 0.112 (0.074-0.159) | 0.146 (0.087-0.217) |
| Mexico                           | 0.107 (0.046-0.187) | 0.135 (0.086-0.193) | 0.159 (0.121-0.200) | 0.181 (0.148-0.218) | 0.196 (0.144-0.256) |
| Micronesia (Federated States of) | 0.173 (0.086-0.277) | 0.196 (0.126-0.278) | 0.214 (0.152-0.283) | 0.224 (0.168-0.286) | 0.228 (0.157-0.303) |
| Moldova                          | 0.101 (0.040-0.195) | 0.115 (0.064-0.178) | 0.114 (0.072-0.165) | 0.113 (0.073-0.160) | 0.121 (0.070-0.181) |
| Mongolia                         | 0.053 (0.015-0.124) | 0.072 (0.034-0.128) | 0.087 (0.051-0.132) | 0.103 (0.067-0.146) | 0.130 (0.079-0.190) |
| Montenegro                       | 0.104 (0.038-0.200) | 0.124 (0.067-0.196) | 0.125 (0.078-0.182) | 0.126 (0.082-0.178) | 0.129 (0.074-0.196) |
| Morocco                          | 0.079 (0.031-0.153) | 0.109 (0.064-0.165) | 0.137 (0.094-0.186) | 0.164 (0.119-0.211) | 0.187 (0.124-0.255) |
| Mozambique                       | 0.007 (0.001-0.021) | 0.012 (0.004-0.026) | 0.022 (0.011-0.037) | 0.040 (0.024-0.061) | 0.063 (0.035-0.101) |
| Myanmar                          | 0.003 (0.000-0.011) | 0.005 (0.002-0.013) | 0.010 (0.005-0.019) | 0.022 (0.012-0.036) | 0.042 (0.023-0.070) |
| Namibia                          | 0.055 (0.016-0.124) | 0.070 (0.033-0.122) | 0.091 (0.055-0.136) | 0.121 (0.084-0.165) | 0.149 (0.095-0.210) |
| Nauru                            | 0.254 (0.168-0.351) | 0.263 (0.199-0.332) | 0.261 (0.202-0.324) | 0.252 (0.189-0.321) | 0.249 (0.158-0.348) |
| Nepal                            | 0.005 (0.001-0.013) | 0.008 (0.003-0.017) | 0.015 (0.008-0.026) | 0.028 (0.016-0.043) | 0.044 (0.024-0.071) |
| Netherlands                      | 0.056 (0.027-0.098) | 0.069 (0.044-0.100) | 0.088 (0.063-0.117) | 0.113 (0.085-0.143) | 0.132 (0.089-0.179) |
| New Zealand                      | 0.075 (0.039-0.122) | 0.094 (0.064-0.130) | 0.118 (0.088-0.152) | 0.150 (0.119-0.185) | 0.167 (0.126-0.214) |
| Nicaragua                        | 0.079 (0.030-0.149) | 0.095 (0.053-0.148) | 0.111 (0.073-0.156) | 0.139 (0.102-0.185) | 0.161 (0.106-0.228) |
| Niger                            | 0.009 (0.002-0.024) | 0.013 (0.005-0.026) | 0.021 (0.011-0.036) | 0.034 (0.020-0.052) | 0.051 (0.028-0.083) |
| Nigeria                          | 0.018 (0.005-0.042) | 0.027 (0.013-0.047) | 0.041 (0.026-0.060) | 0.066 (0.047-0.088) | 0.098 (0.065-0.138) |
| Niue                             | 0.183 (0.091-0.300) | 0.223 (0.143-0.315) | 0.244 (0.173-0.320) | 0.254 (0.190-0.322) | 0.259 (0.181-0.344) |
| North Korea                      | 0.023 (0.006-0.056) | 0.029 (0.012-0.055) | 0.030 (0.014-0.054) | 0.029 (0.012-0.055) | 0.033 (0.009-0.073) |
| Norway                           | 0.062 (0.031-0.107) | 0.088 (0.059-0.123) | 0.112 (0.082-0.148) | 0.135 (0.101-0.171) | 0.145 (0.097-0.200) |
| Occupied Palestinian Territory   | 0.120 (0.054-0.211) | 0.140 (0.086-0.208) | 0.159 (0.113-0.213) | 0.185 (0.139-0.237) | 0.199 (0.133-0.274) |
| Oman                             | 0.097 (0.038-0.182) | 0.138 (0.084-0.199) | 0.175 (0.126-0.225) | 0.197 (0.149-0.246) | 0.212 (0.147-0.283) |
| Pakistan                         | 0.013 (0.004-0.028) | 0.021 (0.010-0.038) | 0.032 (0.019-0.052) | 0.045 (0.028-0.069) | 0.061 (0.035-0.097) |
| Palau                            | 0.251 (0.142-0.371) | 0.254 (0.175-0.337) | 0.261 (0.190-0.339) | 0.264 (0.199-0.336) | 0.265 (0.186-0.350) |
| Panama                           | 0.087 (0.035-0.164) | 0.111 (0.062-0.173) | 0.133 (0.089-0.185) | 0.162 (0.118-0.212) | 0.188 (0.127-0.255) |
| Papua New Guinea                 | 0.069 (0.019-0.154) | 0.087 (0.036-0.156) | 0.111 (0.061-0.174) | 0.132 (0.081-0.193) | 0.155 (0.088-0.237) |



|                                  |                     |                     |                     |                     |                     |
|----------------------------------|---------------------|---------------------|---------------------|---------------------|---------------------|
| Paraguay                         | 0.044 (0.014-0.092) | 0.066 (0.033-0.111) | 0.092 (0.054-0.139) | 0.114 (0.071-0.164) | 0.139 (0.083-0.207) |
| Peru                             | 0.082 (0.031-0.157) | 0.105 (0.060-0.161) | 0.124 (0.085-0.168) | 0.153 (0.119-0.189) | 0.184 (0.137-0.238) |
| Philippines                      | 0.010 (0.003-0.022) | 0.018 (0.010-0.029) | 0.027 (0.018-0.040) | 0.039 (0.026-0.057) | 0.055 (0.030-0.090) |
| Poland                           | 0.128 (0.066-0.213) | 0.134 (0.090-0.186) | 0.138 (0.102-0.180) | 0.148 (0.113-0.188) | 0.152 (0.101-0.210) |
| Portugal                         | 0.063 (0.025-0.119) | 0.081 (0.047-0.124) | 0.105 (0.071-0.146) | 0.125 (0.090-0.168) | 0.140 (0.087-0.199) |
| Puerto Rico                      | 0.119 (0.054-0.203) | 0.153 (0.097-0.221) | 0.184 (0.130-0.246) | 0.200 (0.149-0.256) | 0.204 (0.141-0.275) |
| Qatar                            | 0.175 (0.089-0.280) | 0.230 (0.155-0.313) | 0.233 (0.175-0.296) | 0.248 (0.192-0.305) | 0.251 (0.178-0.329) |
| Romania                          | 0.109 (0.047-0.197) | 0.124 (0.074-0.186) | 0.127 (0.083-0.177) | 0.131 (0.088-0.182) | 0.136 (0.081-0.200) |
| Russian Federation               | 0.159 (0.090-0.246) | 0.166 (0.126-0.215) | 0.162 (0.135-0.191) | 0.160 (0.127-0.195) | 0.161 (0.106-0.223) |
| Rwanda                           | 0.005 (0.001-0.015) | 0.009 (0.002-0.021) | 0.015 (0.006-0.029) | 0.030 (0.016-0.050) | 0.053 (0.028-0.087) |
| Saint Kitts and Nevis            | 0.079 (0.031-0.149) | 0.113 (0.064-0.176) | 0.140 (0.091-0.198) | 0.160 (0.108-0.220) | 0.174 (0.104-0.257) |
| Saint Lucia                      | 0.063 (0.024-0.125) | 0.085 (0.048-0.132) | 0.115 (0.076-0.163) | 0.138 (0.093-0.192) | 0.159 (0.094-0.240) |
| Saint Vincent and the Grenadines | 0.065 (0.024-0.129) | 0.090 (0.048-0.144) | 0.120 (0.076-0.171) | 0.146 (0.099-0.201) | 0.161 (0.101-0.234) |
| Samoa                            | 0.187 (0.098-0.295) | 0.208 (0.136-0.289) | 0.225 (0.162-0.296) | 0.236 (0.177-0.300) | 0.236 (0.165-0.313) |
| Sao Tome and Principe            | 0.027 (0.007-0.061) | 0.037 (0.016-0.066) | 0.057 (0.032-0.091) | 0.079 (0.050-0.115) | 0.103 (0.062-0.153) |
| Saudi Arabia                     | 0.165 (0.081-0.268) | 0.196 (0.139-0.257) | 0.209 (0.170-0.253) | 0.221 (0.180-0.266) | 0.233 (0.171-0.299) |
| Senegal                          | 0.021 (0.006-0.048) | 0.031 (0.015-0.053) | 0.044 (0.025-0.068) | 0.064 (0.041-0.093) | 0.087 (0.052-0.133) |
| Serbia                           | 0.099 (0.044-0.178) | 0.110 (0.067-0.164) | 0.115 (0.079-0.158) | 0.116 (0.083-0.154) | 0.122 (0.077-0.174) |
| Seychelles                       | 0.052 (0.019-0.107) | 0.082 (0.045-0.133) | 0.113 (0.071-0.163) | 0.147 (0.100-0.203) | 0.176 (0.110-0.254) |
| Sierra Leone                     | 0.018 (0.005-0.043) | 0.027 (0.012-0.050) | 0.037 (0.021-0.060) | 0.054 (0.035-0.079) | 0.082 (0.051-0.122) |
| Singapore                        | 0.022 (0.007-0.048) | 0.034 (0.018-0.056) | 0.044 (0.028-0.066) | 0.048 (0.031-0.070) | 0.059 (0.033-0.091) |
| Slovakia                         | 0.094 (0.040-0.173) | 0.111 (0.067-0.165) | 0.121 (0.081-0.163) | 0.130 (0.092-0.171) | 0.141 (0.090-0.202) |
| Slovenia                         | 0.102 (0.043-0.192) | 0.116 (0.068-0.180) | 0.127 (0.083-0.181) | 0.135 (0.092-0.188) | 0.139 (0.084-0.205) |
| Solomon Islands                  | 0.067 (0.017-0.152) | 0.094 (0.039-0.168) | 0.120 (0.067-0.186) | 0.140 (0.089-0.199) | 0.160 (0.095-0.237) |
| Somalia                          | 0.011 (0.002-0.028) | 0.016 (0.006-0.032) | 0.024 (0.011-0.042) | 0.035 (0.017-0.059) | 0.054 (0.024-0.095) |
| South Africa                     | 0.112 (0.047-0.206) | 0.131 (0.079-0.196) | 0.148 (0.107-0.195) | 0.171 (0.136-0.209) | 0.188 (0.141-0.241) |
| South Korea                      | 0.003 (0.001-0.009) | 0.012 (0.006-0.021) | 0.028 (0.017-0.041) | 0.035 (0.024-0.049) | 0.053 (0.031-0.081) |
| Spain                            | 0.089 (0.045-0.149) | 0.107 (0.074-0.144) | 0.127 (0.099-0.157) | 0.146 (0.117-0.178) | 0.159 (0.110-0.214) |
| Sri Lanka                        | 0.008 (0.002-0.021) | 0.014 (0.006-0.027) | 0.025 (0.014-0.041) | 0.043 (0.026-0.065) | 0.068 (0.036-0.114) |
| Sudan                            | 0.016 (0.004-0.039) | 0.024 (0.010-0.046) | 0.039 (0.021-0.064) | 0.061 (0.035-0.094) | 0.086 (0.047-0.138) |
| Suriname                         | 0.108 (0.047-0.193) | 0.138 (0.082-0.205) | 0.148 (0.097-0.207) | 0.165 (0.113-0.222) | 0.181 (0.114-0.255) |
| Swaziland                        | 0.045 (0.012-0.105) | 0.069 (0.031-0.125) | 0.103 (0.059-0.157) | 0.133 (0.085-0.187) | 0.158 (0.094-0.236) |
| Sweden                           | 0.065 (0.032-0.109) | 0.078 (0.052-0.108) | 0.094 (0.069-0.121) | 0.114 (0.085-0.145) | 0.130 (0.086-0.180) |
| Switzerland                      | 0.057 (0.025-0.103) | 0.071 (0.042-0.108) | 0.095 (0.063-0.131) | 0.110 (0.078-0.147) | 0.121 (0.077-0.173) |
| Syrian Arab Republic             | 0.092 (0.037-0.174) | 0.124 (0.074-0.186) | 0.144 (0.098-0.199) | 0.168 (0.120-0.220) | 0.184 (0.122-0.253) |
| Taiwan                           | 0.022 (0.007-0.052) | 0.037 (0.019-0.065) | 0.052 (0.032-0.078) | 0.062 (0.039-0.090) | 0.069 (0.033-0.116) |
| Tajikistan                       | 0.060 (0.018-0.129) | 0.070 (0.031-0.123) | 0.072 (0.039-0.115) | 0.082 (0.049-0.123) | 0.107 (0.059-0.167) |
| Tanzania                         | 0.011 (0.003-0.027) | 0.017 (0.008-0.032) | 0.029 (0.017-0.046) | 0.048 (0.032-0.069) | 0.077 (0.048-0.115) |
| Thailand                         | 0.011 (0.003-0.026) | 0.021 (0.010-0.037) | 0.036 (0.022-0.056) | 0.057 (0.039-0.081) | 0.081 (0.048-0.125) |
| Timor-Leste                      | 0.003 (0.000-0.008) | 0.005 (0.001-0.010) | 0.009 (0.004-0.016) | 0.014 (0.007-0.024) | 0.025 (0.011-0.045) |
| Togo                             | 0.015 (0.004-0.036) | 0.023 (0.009-0.043) | 0.035 (0.019-0.057) | 0.056 (0.035-0.082) | 0.080 (0.047-0.118) |
| Tokelau                          | 0.171 (0.062-0.322) | 0.197 (0.105-0.308) | 0.216 (0.141-0.300) | 0.227 (0.159-0.301) | 0.231 (0.146-0.326) |
| Tonga                            | 0.193 (0.097-0.313) | 0.216 (0.139-0.306) | 0.235 (0.167-0.313) | 0.245 (0.184-0.313) | 0.245 (0.172-0.323) |
| Trinidad and Tobago              | 0.079 (0.024-0.169) | 0.102 (0.048-0.175) | 0.120 (0.073-0.177) | 0.151 (0.097-0.217) | 0.172 (0.091-0.272) |
| Tunisia                          | 0.095 (0.040-0.175) | 0.128 (0.080-0.186) | 0.156 (0.111-0.203) | 0.181 (0.138-0.228) | 0.198 (0.139-0.262) |
| Turkey                           | 0.111 (0.052-0.190) | 0.143 (0.097-0.196) | 0.177 (0.141-0.216) | 0.201 (0.168-0.235) | 0.216 (0.166-0.269) |
| Turkmenistan                     | 0.064 (0.020-0.137) | 0.076 (0.036-0.133) | 0.096 (0.055-0.148) | 0.112 (0.070-0.161) | 0.138 (0.083-0.205) |
| Tuvalu                           | 0.160 (0.078-0.262) | 0.193 (0.123-0.276) | 0.226 (0.160-0.302) | 0.240 (0.174-0.315) | 0.245 (0.162-0.335) |
| Uganda                           | 0.006 (0.001-0.018) | 0.010 (0.003-0.022) | 0.018 (0.008-0.032) | 0.033 (0.018-0.054) | 0.058 (0.032-0.094) |
| Ukraine                          | 0.137 (0.062-0.238) | 0.147 (0.089-0.216) | 0.145 (0.096-0.204) | 0.141 (0.093-0.196) | 0.144 (0.082-0.216) |
| United Arab Emirates             | 0.217 (0.103-0.346) | 0.223 (0.148-0.306) | 0.228 (0.170-0.288) | 0.243 (0.189-0.299) | 0.240 (0.169-0.314) |
| United Kingdom                   | 0.074 (0.041-0.117) | 0.094 (0.070-0.121) | 0.120 (0.100-0.142) | 0.148 (0.128-0.170) | 0.167 (0.131-0.204) |
| United States of America         | 0.094 (0.059-0.137) | 0.115 (0.087-0.146) | 0.138 (0.111-0.168) | 0.159 (0.131-0.189) | 0.170 (0.128-0.217) |
| Uruguay                          | 0.099 (0.040-0.185) | 0.119 (0.067-0.185) | 0.140 (0.093-0.196) | 0.158 (0.111-0.210) | 0.181 (0.120-0.248) |
| Uzbekistan                       | 0.051 (0.015-0.118) | 0.063 (0.028-0.114) | 0.078 (0.043-0.123) | 0.094 (0.056-0.139) | 0.120 (0.067-0.187) |
| Vanuatu                          | 0.083 (0.024-0.177) | 0.107 (0.049-0.183) | 0.134 (0.080-0.200) | 0.158 (0.105-0.218) | 0.179 (0.109-0.257) |
| Venezuela                        | 0.121 (0.053-0.211) | 0.137 (0.082-0.203) | 0.159 (0.110-0.212) | 0.177 (0.133-0.224) | 0.194 (0.133-0.260) |
| Viet Nam                         | 0.002 (0.000-0.007) | 0.004 (0.001-0.008) | 0.007 (0.004-0.012) | 0.015 (0.009-0.024) | 0.028 (0.014-0.049) |
| Yemen                            | 0.055 (0.018-0.119) | 0.072 (0.037-0.122) | 0.094 (0.057-0.139) | 0.121 (0.081-0.167) | 0.140 (0.086-0.203) |
| Zambia                           | 0.025 (0.008-0.057) | 0.036 (0.017-0.061) | 0.046 (0.027-0.070) | 0.065 (0.042-0.091) | 0.096 (0.058-0.142) |
| Zimbabwe                         | 0.059 (0.019-0.126) | 0.080 (0.042-0.132) | 0.105 (0.068-0.151) | 0.128 (0.089-0.175) | 0.144 (0.089-0.209) |

**Men, 35 ≤ BMI < 40 kg/m<sup>2</sup>**

| Country                  | Year                |                     |                     |                     |                     |
|--------------------------|---------------------|---------------------|---------------------|---------------------|---------------------|
|                          | 1975                | 1985                | 1995                | 2005                | 2014                |
| Afghanistan              | 0.000 (0.000-0.000) | 0.000 (0.000-0.000) | 0.000 (0.000-0.001) | 0.000 (0.000-0.001) | 0.001 (0.000-0.003) |
| Albania                  | 0.003 (0.000-0.013) | 0.005 (0.001-0.015) | 0.008 (0.002-0.018) | 0.014 (0.006-0.029) | 0.022 (0.008-0.047) |
| Algeria                  | 0.002 (0.000-0.008) | 0.004 (0.001-0.010) | 0.007 (0.002-0.015) | 0.012 (0.005-0.024) | 0.020 (0.007-0.042) |
| American Samoa           | 0.065 (0.025-0.128) | 0.090 (0.048-0.144) | 0.116 (0.069-0.173) | 0.132 (0.079-0.199) | 0.142 (0.070-0.227) |
| Andorra                  | 0.009 (0.002-0.025) | 0.016 (0.005-0.036) | 0.025 (0.009-0.050) | 0.040 (0.018-0.074) | 0.052 (0.019-0.102) |
| Angola                   | 0.000 (0.000-0.001) | 0.000 (0.000-0.001) | 0.001 (0.000-0.002) | 0.002 (0.000-0.006) | 0.006 (0.001-0.019) |
| Antigua and Barbuda      | 0.002 (0.000-0.009) | 0.005 (0.001-0.014) | 0.012 (0.003-0.028) | 0.023 (0.007-0.049) | 0.040 (0.011-0.094) |
| Argentina                | 0.010 (0.002-0.028) | 0.015 (0.005-0.032) | 0.024 (0.011-0.043) | 0.036 (0.020-0.060) | 0.055 (0.026-0.097) |
| Armenia                  | 0.005 (0.000-0.021) | 0.007 (0.001-0.022) | 0.009 (0.002-0.024) | 0.014 (0.004-0.032) | 0.024 (0.007-0.056) |
| Australia                | 0.009 (0.003-0.019) | 0.013 (0.007-0.021) | 0.022 (0.014-0.033) | 0.040 (0.027-0.056) | 0.060 (0.035-0.093) |
| Austria                  | 0.005 (0.001-0.013) | 0.008 (0.003-0.016) | 0.014 (0.006-0.025) | 0.024 (0.013-0.043) | 0.037 (0.015-0.072) |
| Azerbaijan               | 0.004 (0.000-0.017) | 0.007 (0.001-0.020) | 0.009 (0.002-0.022) | 0.013 (0.004-0.029) | 0.029 (0.008-0.065) |
| Bahamas                  | 0.006 (0.001-0.019) | 0.011 (0.003-0.026) | 0.021 (0.007-0.044) | 0.036 (0.014-0.068) | 0.050 (0.018-0.103) |
| Bahrain                  | 0.012 (0.002-0.035) | 0.016 (0.006-0.034) | 0.025 (0.011-0.045) | 0.036 (0.018-0.061) | 0.048 (0.020-0.090) |
| Bangladesh               | 0.000 (0.000-0.000) | 0.000 (0.000-0.000) | 0.000 (0.000-0.000) | 0.000 (0.000-0.001) | 0.001 (0.000-0.003) |
| Barbados                 | 0.002 (0.000-0.007) | 0.004 (0.001-0.010) | 0.008 (0.003-0.017) | 0.017 (0.007-0.034) | 0.032 (0.010-0.071) |
| Belarus                  | 0.004 (0.000-0.014) | 0.008 (0.002-0.020) | 0.013 (0.004-0.031) | 0.022 (0.008-0.046) | 0.035 (0.011-0.076) |
| Belgium                  | 0.005 (0.001-0.015) | 0.008 (0.004-0.014) | 0.013 (0.007-0.021) | 0.023 (0.013-0.035) | 0.035 (0.016-0.063) |
| Belize                   | 0.002 (0.000-0.007) | 0.003 (0.001-0.009) | 0.007 (0.002-0.015) | 0.014 (0.005-0.028) | 0.023 (0.007-0.051) |
| Benin                    | 0.000 (0.000-0.001) | 0.000 (0.000-0.001) | 0.001 (0.000-0.002) | 0.002 (0.001-0.004) | 0.004 (0.001-0.010) |
| Bermuda                  | 0.013 (0.002-0.042) | 0.020 (0.005-0.052) | 0.031 (0.010-0.068) | 0.048 (0.019-0.091) | 0.072 (0.026-0.136) |
| Bhutan                   | 0.000 (0.000-0.000) | 0.000 (0.000-0.000) | 0.000 (0.000-0.001) | 0.001 (0.000-0.003) | 0.003 (0.001-0.008) |
| Bolivia                  | 0.001 (0.000-0.004) | 0.002 (0.000-0.006) | 0.004 (0.001-0.010) | 0.007 (0.002-0.017) | 0.013 (0.003-0.035) |
| Bosnia and Herzegovina   | 0.002 (0.000-0.008) | 0.002 (0.000-0.008) | 0.004 (0.001-0.011) | 0.012 (0.004-0.024) | 0.016 (0.005-0.033) |
| Botswana                 | 0.000 (0.000-0.001) | 0.000 (0.000-0.002) | 0.002 (0.000-0.006) | 0.006 (0.002-0.014) | 0.013 (0.003-0.033) |
| Brazil                   | 0.002 (0.000-0.005) | 0.004 (0.001-0.009) | 0.008 (0.004-0.014) | 0.015 (0.009-0.023) | 0.025 (0.012-0.045) |
| Brunei Darussalam        | 0.001 (0.000-0.007) | 0.003 (0.000-0.010) | 0.006 (0.001-0.017) | 0.015 (0.004-0.035) | 0.027 (0.007-0.065) |
| Bulgaria                 | 0.006 (0.001-0.022) | 0.012 (0.003-0.027) | 0.018 (0.007-0.036) | 0.025 (0.011-0.047) | 0.036 (0.013-0.074) |
| Burkina Faso             | 0.000 (0.000-0.000) | 0.000 (0.000-0.000) | 0.000 (0.000-0.001) | 0.001 (0.000-0.002) | 0.002 (0.000-0.005) |
| Burundi                  | 0.000 (0.000-0.000) | 0.000 (0.000-0.000) | 0.000 (0.000-0.000) | 0.000 (0.000-0.001) | 0.000 (0.000-0.002) |
| Cabo Verde               | 0.000 (0.000-0.001) | 0.000 (0.000-0.001) | 0.001 (0.000-0.003) | 0.004 (0.001-0.009) | 0.010 (0.003-0.025) |
| Cambodia                 | 0.000 (0.000-0.000) | 0.000 (0.000-0.000) | 0.000 (0.000-0.000) | 0.000 (0.000-0.001) | 0.001 (0.000-0.003) |
| Cameroon                 | 0.000 (0.000-0.001) | 0.000 (0.000-0.001) | 0.001 (0.000-0.003) | 0.002 (0.001-0.005) | 0.006 (0.001-0.014) |
| Canada                   | 0.007 (0.002-0.017) | 0.013 (0.006-0.023) | 0.025 (0.014-0.040) | 0.041 (0.024-0.062) | 0.056 (0.027-0.095) |
| Central African Republic | 0.000 (0.000-0.001) | 0.000 (0.000-0.001) | 0.000 (0.000-0.001) | 0.001 (0.000-0.003) | 0.002 (0.000-0.006) |
| Chad                     | 0.000 (0.000-0.001) | 0.000 (0.000-0.001) | 0.000 (0.000-0.001) | 0.001 (0.000-0.003) | 0.003 (0.001-0.008) |
| Chile                    | 0.006 (0.001-0.019) | 0.010 (0.003-0.024) | 0.019 (0.009-0.035) | 0.032 (0.018-0.051) | 0.047 (0.022-0.082) |
| China                    | 0.000 (0.000-0.000) | 0.000 (0.000-0.000) | 0.000 (0.000-0.000) | 0.001 (0.001-0.002) | 0.006 (0.002-0.011) |
| China (Hong Kong SAR)    | 0.001 (0.000-0.003) | 0.001 (0.000-0.004) | 0.003 (0.001-0.008) | 0.006 (0.002-0.015) | 0.012 (0.002-0.035) |
| Colombia                 | 0.002 (0.000-0.007) | 0.004 (0.001-0.010) | 0.008 (0.003-0.016) | 0.014 (0.007-0.024) | 0.023 (0.009-0.044) |
| Comoros                  | 0.000 (0.000-0.001) | 0.000 (0.000-0.001) | 0.000 (0.000-0.001) | 0.001 (0.000-0.002) | 0.002 (0.000-0.005) |
| Congo                    | 0.000 (0.000-0.001) | 0.001 (0.000-0.003) | 0.002 (0.000-0.005) | 0.004 (0.001-0.009) | 0.008 (0.002-0.022) |
| Cook Islands             | 0.035 (0.008-0.089) | 0.058 (0.024-0.107) | 0.090 (0.045-0.150) | 0.119 (0.067-0.184) | 0.139 (0.072-0.221) |
| Costa Rica               | 0.002 (0.000-0.007) | 0.004 (0.001-0.011) | 0.009 (0.003-0.020) | 0.018 (0.008-0.034) | 0.031 (0.013-0.062) |
| Cote d'Ivoire            | 0.000 (0.000-0.001) | 0.001 (0.000-0.002) | 0.001 (0.000-0.003) | 0.002 (0.001-0.005) | 0.005 (0.001-0.012) |
| Croatia                  | 0.004 (0.000-0.014) | 0.008 (0.002-0.020) | 0.014 (0.005-0.029) | 0.023 (0.010-0.044) | 0.033 (0.011-0.068) |
| Cuba                     | 0.003 (0.000-0.008) | 0.006 (0.002-0.014) | 0.011 (0.004-0.021) | 0.017 (0.008-0.032) | 0.031 (0.013-0.060) |
| Cyprus                   | 0.002 (0.000-0.006) | 0.006 (0.002-0.015) | 0.016 (0.006-0.033) | 0.030 (0.013-0.057) | 0.045 (0.016-0.090) |
| Czech Republic           | 0.012 (0.003-0.035) | 0.020 (0.008-0.038) | 0.026 (0.013-0.044) | 0.034 (0.018-0.056) | 0.042 (0.017-0.080) |
| Denmark                  | 0.005 (0.002-0.012) | 0.009 (0.005-0.016) | 0.016 (0.009-0.027) | 0.025 (0.014-0.041) | 0.036 (0.017-0.065) |
| Djibouti                 | 0.001 (0.000-0.003) | 0.001 (0.000-0.003) | 0.002 (0.000-0.005) | 0.003 (0.001-0.007) | 0.005 (0.001-0.015) |
| Dominica                 | 0.001 (0.000-0.005) | 0.003 (0.001-0.008) | 0.007 (0.002-0.016) | 0.015 (0.005-0.029) | 0.026 (0.009-0.057) |
| Dominican Republic       | 0.001 (0.000-0.003) | 0.002 (0.000-0.006) | 0.005 (0.002-0.010) | 0.013 (0.006-0.025) | 0.026 (0.009-0.055) |
| DR Congo                 | 0.000 (0.000-0.001) | 0.000 (0.000-0.001) | 0.001 (0.000-0.002) | 0.001 (0.000-0.003) | 0.002 (0.000-0.007) |
| Ecuador                  | 0.001 (0.000-0.004) | 0.002 (0.000-0.007) | 0.005 (0.001-0.013) | 0.010 (0.003-0.021) | 0.018 (0.005-0.041) |
| Egypt                    | 0.006 (0.001-0.018) | 0.010 (0.003-0.022) | 0.018 (0.008-0.032) | 0.028 (0.015-0.046) | 0.043 (0.019-0.077) |
| El Salvador              | 0.002 (0.000-0.007) | 0.003 (0.001-0.009) | 0.007 (0.002-0.016) | 0.014 (0.005-0.029) | 0.023 (0.007-0.050) |
| Equatorial Guinea        | 0.000 (0.000-0.001) | 0.000 (0.000-0.001) | 0.001 (0.000-0.003) | 0.006 (0.001-0.017) | 0.017 (0.002-0.051) |
| Eritrea                  | 0.000 (0.000-0.000) | 0.000 (0.000-0.000) | 0.000 (0.000-0.001) | 0.000 (0.000-0.001) | 0.001 (0.000-0.003) |
| Estonia                  | 0.007 (0.001-0.021) | 0.011 (0.005-0.024) | 0.016 (0.008-0.028) | 0.024 (0.015-0.036) | 0.032 (0.015-0.054) |
| Ethiopia                 | 0.000 (0.000-0.000) | 0.000 (0.000-0.000) | 0.000 (0.000-0.000) | 0.000 (0.000-0.001) | 0.001 (0.000-0.002) |
| Fiji                     | 0.008 (0.001-0.034) | 0.013 (0.002-0.038) | 0.020 (0.006-0.047) | 0.031 (0.012-0.061) | 0.044 (0.016-0.089) |
| Finland                  | 0.004 (0.001-0.010) | 0.009 (0.004-0.015) | 0.017 (0.010-0.027) | 0.029 (0.019-0.042) | 0.041 (0.022-0.067) |
| France                   | 0.004 (0.001-0.013) | 0.008 (0.003-0.016) | 0.015 (0.007-0.025) | 0.026 (0.014-0.042) | 0.039 (0.017-0.069) |
| French Polynesia         | 0.044 (0.010-0.109) | 0.065 (0.024-0.129) | 0.089 (0.040-0.156) | 0.110 (0.059-0.173) | 0.127 (0.063-0.204) |

|                                  |                     |                     |                     |                     |                     |
|----------------------------------|---------------------|---------------------|---------------------|---------------------|---------------------|
| Gabon                            | 0.001 (0.000-0.003) | 0.002 (0.000-0.006) | 0.005 (0.001-0.014) | 0.011 (0.003-0.026) | 0.019 (0.004-0.048) |
| Gambia                           | 0.000 (0.000-0.001) | 0.000 (0.000-0.001) | 0.001 (0.000-0.002) | 0.002 (0.001-0.005) | 0.005 (0.001-0.013) |
| Georgia                          | 0.005 (0.000-0.020) | 0.010 (0.002-0.026) | 0.011 (0.003-0.028) | 0.016 (0.005-0.034) | 0.027 (0.009-0.059) |
| Germany                          | 0.004 (0.001-0.010) | 0.008 (0.005-0.013) | 0.015 (0.010-0.022) | 0.026 (0.017-0.038) | 0.038 (0.018-0.066) |
| Ghana                            | 0.000 (0.000-0.001) | 0.001 (0.000-0.002) | 0.001 (0.000-0.003) | 0.004 (0.001-0.008) | 0.009 (0.003-0.022) |
| Greece                           | 0.004 (0.001-0.013) | 0.008 (0.003-0.019) | 0.015 (0.006-0.029) | 0.026 (0.012-0.048) | 0.039 (0.014-0.076) |
| Greenland                        | 0.005 (0.001-0.014) | 0.010 (0.003-0.022) | 0.018 (0.007-0.034) | 0.030 (0.014-0.052) | 0.044 (0.018-0.082) |
| Grenada                          | 0.001 (0.000-0.004) | 0.002 (0.000-0.006) | 0.006 (0.002-0.014) | 0.013 (0.005-0.028) | 0.026 (0.008-0.057) |
| Guatemala                        | 0.001 (0.000-0.006) | 0.003 (0.001-0.008) | 0.005 (0.002-0.012) | 0.011 (0.004-0.022) | 0.018 (0.006-0.041) |
| Guinea                           | 0.000 (0.000-0.000) | 0.000 (0.000-0.001) | 0.000 (0.000-0.001) | 0.001 (0.000-0.003) | 0.002 (0.001-0.007) |
| Guinea Bissau                    | 0.000 (0.000-0.000) | 0.000 (0.000-0.001) | 0.001 (0.000-0.002) | 0.001 (0.000-0.003) | 0.003 (0.001-0.008) |
| Guyana                           | 0.001 (0.000-0.005) | 0.003 (0.001-0.008) | 0.005 (0.002-0.013) | 0.013 (0.004-0.028) | 0.024 (0.007-0.054) |
| Haiti                            | 0.000 (0.000-0.001) | 0.001 (0.000-0.002) | 0.001 (0.000-0.004) | 0.003 (0.001-0.009) | 0.008 (0.001-0.021) |
| Honduras                         | 0.001 (0.000-0.004) | 0.002 (0.000-0.006) | 0.004 (0.001-0.010) | 0.008 (0.003-0.018) | 0.016 (0.004-0.037) |
| Hungary                          | 0.010 (0.002-0.028) | 0.017 (0.007-0.032) | 0.023 (0.011-0.041) | 0.030 (0.015-0.052) | 0.039 (0.015-0.075) |
| Iceland                          | 0.006 (0.001-0.016) | 0.013 (0.005-0.025) | 0.020 (0.009-0.036) | 0.032 (0.016-0.055) | 0.045 (0.019-0.084) |
| India                            | 0.000 (0.000-0.000) | 0.000 (0.000-0.000) | 0.000 (0.000-0.001) | 0.001 (0.000-0.001) | 0.002 (0.001-0.003) |
| Indonesia                        | 0.000 (0.000-0.000) | 0.000 (0.000-0.000) | 0.000 (0.000-0.000) | 0.001 (0.000-0.002) | 0.003 (0.001-0.008) |
| Iran                             | 0.003 (0.000-0.010) | 0.005 (0.002-0.011) | 0.008 (0.004-0.013) | 0.014 (0.009-0.020) | 0.023 (0.012-0.039) |
| Iraq                             | 0.006 (0.001-0.020) | 0.009 (0.003-0.023) | 0.012 (0.004-0.026) | 0.019 (0.008-0.038) | 0.031 (0.011-0.065) |
| Ireland                          | 0.002 (0.000-0.008) | 0.005 (0.002-0.011) | 0.011 (0.005-0.022) | 0.027 (0.013-0.047) | 0.045 (0.020-0.082) |
| Israel                           | 0.008 (0.002-0.023) | 0.014 (0.005-0.028) | 0.023 (0.011-0.041) | 0.034 (0.018-0.057) | 0.048 (0.020-0.090) |
| Italy                            | 0.004 (0.001-0.009) | 0.007 (0.004-0.012) | 0.013 (0.008-0.020) | 0.023 (0.014-0.033) | 0.033 (0.016-0.056) |
| Jamaica                          | 0.002 (0.000-0.006) | 0.003 (0.001-0.007) | 0.006 (0.003-0.012) | 0.014 (0.006-0.025) | 0.026 (0.010-0.055) |
| Japan                            | 0.000 (0.000-0.000) | 0.000 (0.000-0.000) | 0.000 (0.000-0.001) | 0.001 (0.001-0.002) | 0.002 (0.001-0.005) |
| Jordan                           | 0.005 (0.001-0.019) | 0.011 (0.004-0.025) | 0.020 (0.009-0.036) | 0.031 (0.016-0.052) | 0.046 (0.021-0.084) |
| Kazakhstan                       | 0.005 (0.001-0.019) | 0.009 (0.002-0.024) | 0.015 (0.004-0.034) | 0.023 (0.008-0.048) | 0.037 (0.011-0.082) |
| Kenya                            | 0.000 (0.000-0.000) | 0.000 (0.000-0.001) | 0.000 (0.000-0.001) | 0.001 (0.000-0.003) | 0.003 (0.001-0.008) |
| Kiribati                         | 0.023 (0.005-0.059) | 0.034 (0.012-0.068) | 0.050 (0.021-0.091) | 0.074 (0.035-0.124) | 0.090 (0.037-0.165) |
| Kuwait                           | 0.021 (0.004-0.057) | 0.027 (0.012-0.050) | 0.037 (0.020-0.059) | 0.051 (0.031-0.078) | 0.066 (0.033-0.111) |
| Kyrgyzstan                       | 0.003 (0.000-0.012) | 0.004 (0.001-0.013) | 0.006 (0.002-0.016) | 0.009 (0.003-0.022) | 0.016 (0.004-0.039) |
| Lao PDR                          | 0.000 (0.000-0.000) | 0.000 (0.000-0.000) | 0.000 (0.000-0.000) | 0.000 (0.000-0.001) | 0.002 (0.000-0.004) |
| Latvia                           | 0.007 (0.001-0.022) | 0.013 (0.004-0.029) | 0.018 (0.007-0.038) | 0.026 (0.011-0.050) | 0.039 (0.014-0.078) |
| Lebanon                          | 0.006 (0.001-0.021) | 0.011 (0.004-0.026) | 0.017 (0.007-0.035) | 0.027 (0.011-0.050) | 0.042 (0.017-0.079) |
| Lesotho                          | 0.000 (0.000-0.001) | 0.000 (0.000-0.001) | 0.001 (0.000-0.002) | 0.002 (0.001-0.005) | 0.006 (0.001-0.014) |
| Liberia                          | 0.000 (0.000-0.001) | 0.000 (0.000-0.002) | 0.001 (0.000-0.002) | 0.001 (0.000-0.003) | 0.003 (0.001-0.008) |
| Libya                            | 0.008 (0.001-0.029) | 0.015 (0.005-0.033) | 0.021 (0.009-0.040) | 0.029 (0.014-0.051) | 0.039 (0.016-0.073) |
| Lithuania                        | 0.006 (0.001-0.018) | 0.012 (0.004-0.025) | 0.019 (0.008-0.035) | 0.028 (0.014-0.049) | 0.044 (0.018-0.085) |
| Luxembourg                       | 0.005 (0.001-0.014) | 0.009 (0.003-0.021) | 0.018 (0.006-0.039) | 0.031 (0.014-0.057) | 0.046 (0.019-0.087) |
| Macedonia (TFYR)                 | 0.005 (0.001-0.019) | 0.009 (0.002-0.022) | 0.014 (0.004-0.030) | 0.019 (0.007-0.039) | 0.025 (0.008-0.057) |
| Madagascar                       | 0.000 (0.000-0.000) | 0.000 (0.000-0.001) | 0.000 (0.000-0.001) | 0.001 (0.000-0.002) | 0.002 (0.000-0.005) |
| Malawi                           | 0.000 (0.000-0.000) | 0.000 (0.000-0.000) | 0.000 (0.000-0.001) | 0.000 (0.000-0.001) | 0.001 (0.000-0.003) |
| Malaysia                         | 0.000 (0.000-0.001) | 0.001 (0.000-0.002) | 0.002 (0.001-0.005) | 0.008 (0.004-0.015) | 0.020 (0.008-0.040) |
| Maldives                         | 0.000 (0.000-0.000) | 0.000 (0.000-0.000) | 0.000 (0.000-0.001) | 0.002 (0.000-0.006) | 0.006 (0.001-0.015) |
| Mali                             | 0.000 (0.000-0.001) | 0.000 (0.000-0.001) | 0.001 (0.000-0.002) | 0.001 (0.000-0.004) | 0.003 (0.001-0.010) |
| Malta                            | 0.007 (0.001-0.025) | 0.013 (0.004-0.030) | 0.022 (0.009-0.044) | 0.038 (0.017-0.068) | 0.053 (0.020-0.103) |
| Marshall Islands                 | 0.034 (0.007-0.088) | 0.049 (0.017-0.099) | 0.072 (0.034-0.125) | 0.088 (0.045-0.147) | 0.103 (0.042-0.185) |
| Mauritania                       | 0.000 (0.000-0.001) | 0.000 (0.000-0.001) | 0.001 (0.000-0.002) | 0.002 (0.000-0.005) | 0.004 (0.001-0.012) |
| Mauritius                        | 0.000 (0.000-0.002) | 0.001 (0.000-0.003) | 0.003 (0.001-0.006) | 0.007 (0.003-0.015) | 0.016 (0.005-0.039) |
| Mexico                           | 0.005 (0.001-0.015) | 0.010 (0.003-0.021) | 0.019 (0.010-0.032) | 0.032 (0.021-0.049) | 0.048 (0.025-0.080) |
| Micronesia (Federated States of) | 0.022 (0.004-0.060) | 0.034 (0.013-0.071) | 0.051 (0.024-0.091) | 0.069 (0.038-0.109) | 0.087 (0.042-0.149) |
| Moldova                          | 0.003 (0.000-0.010) | 0.005 (0.001-0.014) | 0.008 (0.002-0.019) | 0.011 (0.004-0.025) | 0.019 (0.006-0.044) |
| Mongolia                         | 0.003 (0.000-0.011) | 0.004 (0.001-0.013) | 0.007 (0.002-0.016) | 0.010 (0.004-0.021) | 0.019 (0.007-0.041) |
| Montenegro                       | 0.004 (0.000-0.016) | 0.008 (0.002-0.023) | 0.014 (0.004-0.031) | 0.021 (0.008-0.042) | 0.029 (0.009-0.062) |
| Morocco                          | 0.002 (0.000-0.008) | 0.003 (0.001-0.010) | 0.006 (0.002-0.014) | 0.011 (0.004-0.022) | 0.019 (0.006-0.042) |
| Mozambique                       | 0.000 (0.000-0.000) | 0.000 (0.000-0.000) | 0.000 (0.000-0.001) | 0.000 (0.000-0.001) | 0.001 (0.000-0.003) |
| Myanmar                          | 0.000 (0.000-0.000) | 0.000 (0.000-0.000) | 0.000 (0.000-0.000) | 0.000 (0.000-0.001) | 0.002 (0.000-0.004) |
| Namibia                          | 0.000 (0.000-0.002) | 0.001 (0.000-0.003) | 0.002 (0.000-0.005) | 0.005 (0.002-0.011) | 0.012 (0.003-0.029) |
| Nauru                            | 0.092 (0.037-0.170) | 0.114 (0.067-0.171) | 0.125 (0.079-0.180) | 0.123 (0.074-0.184) | 0.130 (0.056-0.220) |
| Nepal                            | 0.000 (0.000-0.000) | 0.000 (0.000-0.000) | 0.000 (0.000-0.001) | 0.001 (0.000-0.002) | 0.002 (0.000-0.004) |
| Netherlands                      | 0.002 (0.000-0.006) | 0.004 (0.002-0.008) | 0.008 (0.004-0.015) | 0.018 (0.010-0.028) | 0.027 (0.012-0.050) |
| New Zealand                      | 0.007 (0.002-0.018) | 0.012 (0.005-0.022) | 0.022 (0.012-0.035) | 0.040 (0.026-0.059) | 0.062 (0.037-0.094) |
| Nicaragua                        | 0.002 (0.000-0.007) | 0.003 (0.001-0.009) | 0.005 (0.001-0.012) | 0.010 (0.003-0.021) | 0.017 (0.005-0.039) |
| Niger                            | 0.000 (0.000-0.000) | 0.000 (0.000-0.000) | 0.000 (0.000-0.001) | 0.001 (0.000-0.002) | 0.001 (0.000-0.003) |
| Nigeria                          | 0.000 (0.000-0.001) | 0.000 (0.000-0.001) | 0.001 (0.000-0.002) | 0.003 (0.001-0.005) | 0.007 (0.003-0.016) |
| Niue                             | 0.021 (0.004-0.061) | 0.040 (0.013-0.085) | 0.066 (0.028-0.119) | 0.093 (0.048-0.149) | 0.120 (0.059-0.193) |
| North Korea                      | 0.000 (0.000-0.000) | 0.000 (0.000-0.001) | 0.000 (0.000-0.001) | 0.001 (0.000-0.002) | 0.001 (0.000-0.005) |
| Norway                           | 0.004 (0.001-0.011) | 0.010 (0.004-0.018) | 0.020 (0.011-0.033) | 0.036 (0.022-0.055) | 0.050 (0.025-0.087) |

|                                  |                     |                     |                     |                     |                     |
|----------------------------------|---------------------|---------------------|---------------------|---------------------|---------------------|
| Occupied Palestinian Territory   | 0.007 (0.001-0.022) | 0.010 (0.003-0.025) | 0.016 (0.006-0.031) | 0.026 (0.012-0.047) | 0.037 (0.013-0.075) |
| Oman                             | 0.002 (0.000-0.009) | 0.006 (0.002-0.015) | 0.014 (0.006-0.025) | 0.023 (0.012-0.039) | 0.036 (0.015-0.068) |
| Pakistan                         | 0.000 (0.000-0.001) | 0.000 (0.000-0.001) | 0.001 (0.000-0.002) | 0.002 (0.000-0.004) | 0.003 (0.001-0.009) |
| Palau                            | 0.053 (0.013-0.125) | 0.070 (0.029-0.128) | 0.094 (0.046-0.153) | 0.114 (0.063-0.174) | 0.129 (0.064-0.205) |
| Panama                           | 0.003 (0.000-0.010) | 0.005 (0.001-0.014) | 0.010 (0.003-0.022) | 0.019 (0.008-0.036) | 0.035 (0.013-0.069) |
| Papua New Guinea                 | 0.003 (0.000-0.016) | 0.005 (0.001-0.017) | 0.008 (0.002-0.022) | 0.012 (0.003-0.029) | 0.019 (0.004-0.051) |
| Paraguay                         | 0.001 (0.000-0.005) | 0.003 (0.000-0.008) | 0.006 (0.002-0.016) | 0.012 (0.004-0.028) | 0.021 (0.006-0.050) |
| Peru                             | 0.002 (0.000-0.007) | 0.003 (0.001-0.010) | 0.006 (0.002-0.014) | 0.011 (0.005-0.021) | 0.021 (0.008-0.042) |
| Philippines                      | 0.000 (0.000-0.000) | 0.000 (0.000-0.001) | 0.001 (0.000-0.002) | 0.002 (0.001-0.004) | 0.005 (0.001-0.012) |
| Poland                           | 0.009 (0.002-0.026) | 0.015 (0.007-0.027) | 0.021 (0.012-0.034) | 0.032 (0.020-0.047) | 0.043 (0.021-0.073) |
| Portugal                         | 0.001 (0.000-0.005) | 0.003 (0.001-0.007) | 0.008 (0.003-0.014) | 0.017 (0.009-0.028) | 0.029 (0.011-0.056) |
| Puerto Rico                      | 0.004 (0.000-0.013) | 0.010 (0.003-0.023) | 0.024 (0.009-0.047) | 0.041 (0.019-0.072) | 0.057 (0.023-0.108) |
| Qatar                            | 0.014 (0.002-0.042) | 0.031 (0.011-0.067) | 0.040 (0.019-0.072) | 0.061 (0.033-0.099) | 0.081 (0.040-0.137) |
| Romania                          | 0.005 (0.001-0.018) | 0.010 (0.003-0.023) | 0.016 (0.006-0.030) | 0.023 (0.010-0.041) | 0.032 (0.011-0.067) |
| Russian Federation               | 0.005 (0.001-0.013) | 0.009 (0.004-0.015) | 0.014 (0.009-0.021) | 0.022 (0.013-0.032) | 0.034 (0.014-0.062) |
| Rwanda                           | 0.000 (0.000-0.000) | 0.000 (0.000-0.000) | 0.000 (0.000-0.000) | 0.000 (0.000-0.001) | 0.001 (0.000-0.002) |
| Saint Kitts and Nevis            | 0.002 (0.000-0.007) | 0.005 (0.001-0.013) | 0.010 (0.003-0.024) | 0.022 (0.009-0.044) | 0.038 (0.012-0.084) |
| Saint Lucia                      | 0.001 (0.000-0.004) | 0.002 (0.000-0.005) | 0.005 (0.002-0.012) | 0.013 (0.005-0.027) | 0.027 (0.008-0.063) |
| Saint Vincent and the Grenadines | 0.001 (0.000-0.005) | 0.002 (0.000-0.007) | 0.006 (0.002-0.015) | 0.014 (0.005-0.030) | 0.026 (0.008-0.060) |
| Samoa                            | 0.022 (0.005-0.059) | 0.036 (0.014-0.072) | 0.060 (0.029-0.103) | 0.088 (0.050-0.137) | 0.109 (0.054-0.179) |
| Sao Tome and Principe            | 0.000 (0.000-0.002) | 0.001 (0.000-0.002) | 0.002 (0.000-0.005) | 0.004 (0.001-0.009) | 0.008 (0.002-0.019) |
| Saudi Arabia                     | 0.008 (0.001-0.027) | 0.017 (0.007-0.033) | 0.027 (0.016-0.041) | 0.039 (0.024-0.058) | 0.058 (0.029-0.098) |
| Senegal                          | 0.000 (0.000-0.001) | 0.000 (0.000-0.001) | 0.001 (0.000-0.002) | 0.002 (0.000-0.004) | 0.004 (0.001-0.010) |
| Serbia                           | 0.004 (0.001-0.014) | 0.008 (0.003-0.018) | 0.013 (0.006-0.024) | 0.019 (0.010-0.032) | 0.025 (0.011-0.047) |
| Seychelles                       | 0.001 (0.000-0.003) | 0.002 (0.000-0.005) | 0.005 (0.001-0.011) | 0.012 (0.004-0.025) | 0.025 (0.008-0.056) |
| Sierra Leone                     | 0.000 (0.000-0.001) | 0.000 (0.000-0.001) | 0.001 (0.000-0.002) | 0.001 (0.000-0.003) | 0.003 (0.001-0.008) |
| Singapore                        | 0.000 (0.000-0.001) | 0.000 (0.000-0.001) | 0.001 (0.000-0.003) | 0.003 (0.001-0.005) | 0.005 (0.002-0.012) |
| Slovakia                         | 0.004 (0.001-0.014) | 0.008 (0.003-0.019) | 0.014 (0.006-0.027) | 0.021 (0.010-0.038) | 0.032 (0.013-0.062) |
| Slovenia                         | 0.004 (0.000-0.014) | 0.008 (0.002-0.020) | 0.014 (0.005-0.030) | 0.022 (0.008-0.043) | 0.029 (0.009-0.062) |
| Solomon Islands                  | 0.003 (0.000-0.013) | 0.004 (0.001-0.016) | 0.008 (0.001-0.021) | 0.011 (0.003-0.026) | 0.016 (0.004-0.041) |
| Somalia                          | 0.000 (0.000-0.001) | 0.000 (0.000-0.001) | 0.000 (0.000-0.001) | 0.001 (0.000-0.002) | 0.001 (0.000-0.004) |
| South Africa                     | 0.002 (0.000-0.007) | 0.004 (0.001-0.010) | 0.008 (0.004-0.016) | 0.016 (0.009-0.027) | 0.031 (0.015-0.053) |
| South Korea                      | 0.000 (0.000-0.000) | 0.000 (0.000-0.000) | 0.000 (0.000-0.001) | 0.001 (0.000-0.002) | 0.002 (0.001-0.005) |
| Spain                            | 0.003 (0.001-0.009) | 0.007 (0.003-0.013) | 0.015 (0.009-0.023) | 0.028 (0.018-0.041) | 0.041 (0.019-0.073) |
| Sri Lanka                        | 0.000 (0.000-0.000) | 0.000 (0.000-0.000) | 0.000 (0.000-0.001) | 0.001 (0.000-0.002) | 0.004 (0.001-0.011) |
| Sudan                            | 0.000 (0.000-0.001) | 0.000 (0.000-0.001) | 0.001 (0.000-0.002) | 0.002 (0.000-0.004) | 0.004 (0.001-0.010) |
| Suriname                         | 0.003 (0.000-0.010) | 0.006 (0.001-0.016) | 0.010 (0.003-0.023) | 0.018 (0.006-0.038) | 0.032 (0.010-0.068) |
| Swaziland                        | 0.000 (0.000-0.001) | 0.001 (0.000-0.002) | 0.002 (0.000-0.005) | 0.004 (0.001-0.011) | 0.010 (0.002-0.026) |
| Sweden                           | 0.006 (0.002-0.013) | 0.010 (0.005-0.016) | 0.017 (0.010-0.025) | 0.029 (0.019-0.042) | 0.042 (0.021-0.071) |
| Switzerland                      | 0.004 (0.001-0.013) | 0.008 (0.003-0.016) | 0.018 (0.009-0.030) | 0.028 (0.016-0.045) | 0.040 (0.020-0.071) |
| Syrian Arab Republic             | 0.003 (0.000-0.011) | 0.006 (0.001-0.014) | 0.009 (0.003-0.020) | 0.015 (0.006-0.031) | 0.023 (0.008-0.051) |
| Taiwan                           | 0.000 (0.000-0.000) | 0.000 (0.000-0.001) | 0.001 (0.000-0.002) | 0.003 (0.001-0.006) | 0.007 (0.002-0.017) |
| Tajikistan                       | 0.003 (0.000-0.012) | 0.004 (0.001-0.013) | 0.005 (0.001-0.014) | 0.006 (0.001-0.016) | 0.012 (0.003-0.033) |
| Tanzania                         | 0.000 (0.000-0.000) | 0.000 (0.000-0.001) | 0.000 (0.000-0.001) | 0.001 (0.000-0.002) | 0.003 (0.001-0.006) |
| Thailand                         | 0.000 (0.000-0.000) | 0.000 (0.000-0.000) | 0.001 (0.000-0.001) | 0.002 (0.001-0.005) | 0.008 (0.002-0.018) |
| Timor-Leste                      | 0.000 (0.000-0.000) | 0.000 (0.000-0.000) | 0.000 (0.000-0.000) | 0.000 (0.000-0.000) | 0.001 (0.000-0.002) |
| Togo                             | 0.000 (0.000-0.001) | 0.000 (0.000-0.001) | 0.001 (0.000-0.002) | 0.001 (0.000-0.003) | 0.003 (0.001-0.008) |
| Tokelau                          | 0.021 (0.002-0.074) | 0.033 (0.007-0.086) | 0.054 (0.019-0.109) | 0.078 (0.035-0.136) | 0.103 (0.040-0.191) |
| Tonga                            | 0.027 (0.005-0.073) | 0.043 (0.015-0.090) | 0.067 (0.031-0.119) | 0.093 (0.051-0.148) | 0.114 (0.057-0.189) |
| Trinidad and Tobago              | 0.001 (0.000-0.007) | 0.003 (0.000-0.010) | 0.006 (0.002-0.015) | 0.016 (0.005-0.035) | 0.035 (0.008-0.087) |
| Tunisia                          | 0.003 (0.000-0.010) | 0.005 (0.001-0.011) | 0.008 (0.003-0.016) | 0.015 (0.007-0.027) | 0.024 (0.009-0.048) |
| Turkey                           | 0.003 (0.001-0.011) | 0.006 (0.003-0.014) | 0.013 (0.007-0.022) | 0.023 (0.015-0.034) | 0.037 (0.020-0.062) |
| Turkmenistan                     | 0.003 (0.000-0.014) | 0.005 (0.001-0.015) | 0.009 (0.002-0.022) | 0.013 (0.004-0.029) | 0.025 (0.008-0.056) |
| Tuvalu                           | 0.019 (0.004-0.053) | 0.033 (0.011-0.071) | 0.059 (0.025-0.109) | 0.082 (0.040-0.141) | 0.102 (0.042-0.182) |
| Uganda                           | 0.000 (0.000-0.000) | 0.000 (0.000-0.000) | 0.000 (0.000-0.000) | 0.000 (0.000-0.001) | 0.001 (0.000-0.003) |
| Ukraine                          | 0.005 (0.001-0.019) | 0.010 (0.002-0.024) | 0.015 (0.005-0.032) | 0.019 (0.007-0.042) | 0.029 (0.008-0.066) |
| United Arab Emirates             | 0.022 (0.003-0.070) | 0.026 (0.008-0.057) | 0.033 (0.015-0.059) | 0.050 (0.026-0.082) | 0.058 (0.024-0.106) |
| United Kingdom                   | 0.006 (0.002-0.014) | 0.010 (0.005-0.016) | 0.018 (0.013-0.025) | 0.036 (0.027-0.045) | 0.056 (0.037-0.080) |
| United States of America         | 0.012 (0.005-0.025) | 0.021 (0.012-0.033) | 0.037 (0.024-0.052) | 0.060 (0.042-0.081) | 0.080 (0.048-0.116) |
| Uruguay                          | 0.008 (0.001-0.026) | 0.012 (0.003-0.030) | 0.020 (0.008-0.040) | 0.030 (0.014-0.055) | 0.046 (0.019-0.087) |
| Uzbekistan                       | 0.003 (0.000-0.011) | 0.004 (0.001-0.013) | 0.006 (0.001-0.016) | 0.009 (0.003-0.022) | 0.017 (0.004-0.043) |
| Vanuatu                          | 0.005 (0.000-0.023) | 0.007 (0.001-0.024) | 0.012 (0.003-0.031) | 0.019 (0.006-0.040) | 0.029 (0.009-0.065) |
| Venezuela                        | 0.005 (0.001-0.018) | 0.010 (0.003-0.023) | 0.017 (0.007-0.034) | 0.027 (0.014-0.046) | 0.040 (0.017-0.074) |
| Viet Nam                         | 0.000 (0.000-0.000) | 0.000 (0.000-0.000) | 0.000 (0.000-0.000) | 0.000 (0.000-0.000) | 0.001 (0.000-0.002) |
| Yemen                            | 0.001 (0.000-0.004) | 0.002 (0.000-0.005) | 0.003 (0.001-0.007) | 0.005 (0.002-0.012) | 0.009 (0.002-0.021) |
| Zambia                           | 0.000 (0.000-0.001) | 0.000 (0.000-0.002) | 0.001 (0.000-0.002) | 0.001 (0.000-0.004) | 0.004 (0.001-0.010) |
| Zimbabwe                         | 0.000 (0.000-0.001) | 0.000 (0.000-0.001) | 0.001 (0.000-0.003) | 0.002 (0.001-0.006) | 0.004 (0.001-0.011) |

**Women, 35 ≤ BMI < 40 kg/m<sup>2</sup>**

| Country                  | Year                |                     |                     |                     |                     |
|--------------------------|---------------------|---------------------|---------------------|---------------------|---------------------|
|                          | 1975                | 1985                | 1995                | 2005                | 2014                |
| Afghanistan              | 0.001 (0.000-0.003) | 0.001 (0.000-0.004) | 0.002 (0.001-0.006) | 0.004 (0.001-0.009) | 0.008 (0.002-0.018) |
| Albania                  | 0.014 (0.003-0.039) | 0.017 (0.005-0.038) | 0.020 (0.008-0.040) | 0.029 (0.014-0.052) | 0.038 (0.015-0.073) |
| Algeria                  | 0.017 (0.004-0.046) | 0.028 (0.011-0.055) | 0.040 (0.020-0.069) | 0.056 (0.031-0.091) | 0.073 (0.038-0.120) |
| American Samoa           | 0.141 (0.075-0.227) | 0.155 (0.099-0.221) | 0.167 (0.113-0.231) | 0.175 (0.114-0.245) | 0.180 (0.100-0.269) |
| Andorra                  | 0.034 (0.010-0.078) | 0.044 (0.018-0.082) | 0.051 (0.024-0.089) | 0.064 (0.033-0.107) | 0.070 (0.031-0.127) |
| Angola                   | 0.002 (0.000-0.008) | 0.004 (0.001-0.011) | 0.007 (0.002-0.017) | 0.014 (0.004-0.031) | 0.028 (0.009-0.064) |
| Antigua and Barbuda      | 0.022 (0.004-0.057) | 0.036 (0.013-0.073) | 0.059 (0.027-0.104) | 0.082 (0.042-0.138) | 0.112 (0.049-0.197) |
| Argentina                | 0.028 (0.008-0.064) | 0.037 (0.017-0.069) | 0.050 (0.028-0.080) | 0.067 (0.042-0.098) | 0.091 (0.052-0.142) |
| Armenia                  | 0.015 (0.002-0.043) | 0.021 (0.006-0.047) | 0.025 (0.010-0.050) | 0.037 (0.017-0.064) | 0.054 (0.022-0.100) |
| Australia                | 0.018 (0.008-0.034) | 0.028 (0.018-0.041) | 0.041 (0.029-0.057) | 0.059 (0.043-0.079) | 0.076 (0.049-0.111) |
| Austria                  | 0.012 (0.004-0.027) | 0.017 (0.008-0.030) | 0.024 (0.012-0.039) | 0.033 (0.018-0.053) | 0.041 (0.019-0.073) |
| Azerbaijan               | 0.018 (0.003-0.052) | 0.026 (0.008-0.057) | 0.031 (0.013-0.058) | 0.042 (0.021-0.074) | 0.069 (0.031-0.126) |
| Bahamas                  | 0.040 (0.010-0.096) | 0.056 (0.023-0.107) | 0.075 (0.038-0.127) | 0.096 (0.052-0.152) | 0.113 (0.056-0.183) |
| Bahrain                  | 0.050 (0.015-0.109) | 0.056 (0.027-0.096) | 0.070 (0.039-0.106) | 0.086 (0.051-0.127) | 0.101 (0.055-0.157) |
| Bangladesh               | 0.000 (0.000-0.001) | 0.001 (0.000-0.001) | 0.001 (0.000-0.003) | 0.003 (0.001-0.005) | 0.006 (0.002-0.012) |
| Barbados                 | 0.019 (0.005-0.049) | 0.032 (0.013-0.060) | 0.047 (0.025-0.077) | 0.071 (0.040-0.113) | 0.098 (0.046-0.169) |
| Belarus                  | 0.022 (0.004-0.061) | 0.032 (0.011-0.067) | 0.040 (0.017-0.075) | 0.049 (0.023-0.087) | 0.062 (0.026-0.116) |
| Belgium                  | 0.017 (0.006-0.037) | 0.023 (0.013-0.036) | 0.030 (0.020-0.044) | 0.038 (0.024-0.055) | 0.042 (0.021-0.071) |
| Belize                   | 0.015 (0.003-0.043) | 0.024 (0.008-0.050) | 0.038 (0.017-0.067) | 0.057 (0.030-0.093) | 0.077 (0.035-0.135) |
| Benin                    | 0.002 (0.000-0.006) | 0.004 (0.001-0.009) | 0.008 (0.003-0.015) | 0.016 (0.008-0.027) | 0.027 (0.013-0.049) |
| Bermuda                  | 0.066 (0.018-0.144) | 0.079 (0.033-0.146) | 0.093 (0.046-0.155) | 0.108 (0.059-0.170) | 0.133 (0.066-0.218) |
| Bhutan                   | 0.000 (0.000-0.002) | 0.001 (0.000-0.003) | 0.003 (0.001-0.007) | 0.007 (0.003-0.014) | 0.013 (0.005-0.026) |
| Bolivia                  | 0.008 (0.001-0.026) | 0.014 (0.004-0.032) | 0.022 (0.009-0.043) | 0.036 (0.018-0.063) | 0.055 (0.025-0.100) |
| Bosnia and Herzegovina   | 0.007 (0.001-0.025) | 0.009 (0.002-0.024) | 0.014 (0.005-0.029) | 0.029 (0.014-0.051) | 0.034 (0.015-0.062) |
| Botswana                 | 0.007 (0.001-0.024) | 0.017 (0.004-0.042) | 0.037 (0.015-0.072) | 0.054 (0.025-0.093) | 0.075 (0.033-0.132) |
| Brazil                   | 0.010 (0.002-0.026) | 0.020 (0.009-0.034) | 0.031 (0.020-0.046) | 0.047 (0.034-0.063) | 0.067 (0.041-0.100) |
| Brunei Darussalam        | 0.009 (0.001-0.035) | 0.014 (0.003-0.039) | 0.021 (0.007-0.046) | 0.033 (0.013-0.063) | 0.043 (0.015-0.090) |
| Bulgaria                 | 0.022 (0.005-0.056) | 0.030 (0.011-0.059) | 0.035 (0.016-0.063) | 0.041 (0.020-0.071) | 0.050 (0.021-0.094) |
| Burkina Faso             | 0.001 (0.000-0.002) | 0.001 (0.000-0.003) | 0.003 (0.001-0.006) | 0.008 (0.004-0.014) | 0.015 (0.006-0.030) |
| Burundi                  | 0.000 (0.000-0.001) | 0.000 (0.000-0.002) | 0.001 (0.000-0.003) | 0.003 (0.001-0.007) | 0.007 (0.002-0.017) |
| Cabo Verde               | 0.001 (0.000-0.005) | 0.003 (0.001-0.009) | 0.009 (0.003-0.019) | 0.023 (0.010-0.043) | 0.039 (0.016-0.074) |
| Cambodia                 | 0.000 (0.000-0.000) | 0.000 (0.000-0.001) | 0.001 (0.000-0.002) | 0.002 (0.001-0.004) | 0.006 (0.002-0.013) |
| Cameroon                 | 0.003 (0.000-0.008) | 0.006 (0.002-0.013) | 0.011 (0.005-0.020) | 0.021 (0.012-0.034) | 0.036 (0.018-0.063) |
| Canada                   | 0.015 (0.006-0.030) | 0.026 (0.015-0.042) | 0.041 (0.026-0.061) | 0.059 (0.038-0.084) | 0.072 (0.041-0.113) |
| Central African Republic | 0.001 (0.000-0.005) | 0.002 (0.000-0.007) | 0.004 (0.001-0.010) | 0.008 (0.003-0.017) | 0.015 (0.004-0.036) |
| Chad                     | 0.001 (0.000-0.004) | 0.002 (0.000-0.005) | 0.005 (0.002-0.010) | 0.011 (0.005-0.020) | 0.022 (0.009-0.042) |
| Chile                    | 0.023 (0.005-0.057) | 0.034 (0.014-0.064) | 0.050 (0.028-0.078) | 0.070 (0.045-0.101) | 0.093 (0.054-0.143) |
| China                    | 0.000 (0.000-0.001) | 0.000 (0.000-0.001) | 0.001 (0.001-0.002) | 0.004 (0.003-0.007) | 0.011 (0.005-0.020) |
| China (Hong Kong SAR)    | 0.005 (0.001-0.020) | 0.007 (0.002-0.018) | 0.009 (0.003-0.021) | 0.011 (0.004-0.025) | 0.014 (0.003-0.038) |
| Colombia                 | 0.011 (0.002-0.030) | 0.019 (0.007-0.037) | 0.029 (0.015-0.048) | 0.043 (0.027-0.064) | 0.060 (0.033-0.098) |
| Comoros                  | 0.002 (0.000-0.007) | 0.003 (0.001-0.008) | 0.006 (0.002-0.012) | 0.010 (0.004-0.020) | 0.019 (0.008-0.038) |
| Congo                    | 0.003 (0.000-0.008) | 0.006 (0.002-0.013) | 0.011 (0.005-0.021) | 0.018 (0.008-0.032) | 0.030 (0.012-0.060) |
| Cook Islands             | 0.095 (0.036-0.183) | 0.124 (0.068-0.197) | 0.150 (0.090-0.223) | 0.168 (0.107-0.241) | 0.180 (0.102-0.268) |
| Costa Rica               | 0.010 (0.002-0.030) | 0.019 (0.006-0.040) | 0.032 (0.015-0.058) | 0.052 (0.029-0.082) | 0.073 (0.039-0.120) |
| Cote d'Ivoire            | 0.003 (0.000-0.010) | 0.006 (0.002-0.013) | 0.010 (0.004-0.019) | 0.017 (0.009-0.030) | 0.027 (0.013-0.050) |
| Croatia                  | 0.015 (0.003-0.042) | 0.023 (0.008-0.048) | 0.029 (0.013-0.055) | 0.039 (0.018-0.068) | 0.049 (0.020-0.093) |
| Cuba                     | 0.021 (0.005-0.053) | 0.036 (0.016-0.068) | 0.048 (0.025-0.078) | 0.059 (0.034-0.091) | 0.079 (0.041-0.128) |
| Cyprus                   | 0.009 (0.002-0.027) | 0.021 (0.008-0.045) | 0.038 (0.017-0.069) | 0.053 (0.026-0.093) | 0.065 (0.028-0.122) |
| Czech Republic           | 0.039 (0.013-0.086) | 0.048 (0.025-0.082) | 0.052 (0.030-0.080) | 0.057 (0.033-0.087) | 0.061 (0.029-0.105) |
| Denmark                  | 0.014 (0.005-0.032) | 0.021 (0.010-0.036) | 0.028 (0.015-0.045) | 0.035 (0.020-0.055) | 0.041 (0.020-0.071) |
| Djibouti                 | 0.006 (0.001-0.019) | 0.007 (0.001-0.019) | 0.011 (0.003-0.025) | 0.016 (0.005-0.035) | 0.025 (0.007-0.057) |
| Dominica                 | 0.016 (0.003-0.044) | 0.027 (0.010-0.056) | 0.045 (0.022-0.080) | 0.065 (0.035-0.106) | 0.089 (0.045-0.149) |
| Dominican Republic       | 0.009 (0.002-0.026) | 0.019 (0.008-0.037) | 0.031 (0.017-0.052) | 0.055 (0.032-0.084) | 0.078 (0.040-0.128) |
| DR Congo                 | 0.002 (0.000-0.006) | 0.003 (0.001-0.007) | 0.005 (0.001-0.010) | 0.008 (0.003-0.016) | 0.016 (0.005-0.035) |
| Ecuador                  | 0.007 (0.001-0.023) | 0.014 (0.004-0.034) | 0.024 (0.009-0.048) | 0.037 (0.018-0.065) | 0.055 (0.025-0.099) |
| Egypt                    | 0.027 (0.007-0.065) | 0.043 (0.022-0.074) | 0.062 (0.040-0.092) | 0.086 (0.060-0.118) | 0.113 (0.072-0.164) |
| El Salvador              | 0.011 (0.002-0.033) | 0.018 (0.006-0.039) | 0.030 (0.014-0.054) | 0.049 (0.027-0.078) | 0.068 (0.034-0.113) |
| Equatorial Guinea        | 0.001 (0.000-0.006) | 0.003 (0.001-0.009) | 0.007 (0.002-0.016) | 0.030 (0.010-0.062) | 0.053 (0.017-0.115) |
| Eritrea                  | 0.001 (0.000-0.002) | 0.001 (0.000-0.003) | 0.002 (0.001-0.005) | 0.006 (0.002-0.011) | 0.012 (0.004-0.024) |
| Estonia                  | 0.031 (0.009-0.075) | 0.037 (0.018-0.065) | 0.040 (0.023-0.065) | 0.046 (0.031-0.065) | 0.053 (0.029-0.082) |
| Ethiopia                 | 0.000 (0.000-0.002) | 0.001 (0.000-0.002) | 0.002 (0.000-0.004) | 0.004 (0.001-0.007) | 0.009 (0.003-0.018) |
| Fiji                     | 0.036 (0.007-0.104) | 0.049 (0.016-0.109) | 0.063 (0.029-0.114) | 0.080 (0.044-0.129) | 0.095 (0.047-0.156) |
| Finland                  | 0.011 (0.004-0.023) | 0.019 (0.011-0.031) | 0.029 (0.019-0.042) | 0.039 (0.027-0.054) | 0.046 (0.026-0.072) |
| France                   | 0.021 (0.007-0.048) | 0.029 (0.014-0.050) | 0.038 (0.022-0.060) | 0.050 (0.030-0.076) | 0.060 (0.031-0.099) |
| French Polynesia         | 0.116 (0.045-0.226) | 0.135 (0.067-0.224) | 0.151 (0.084-0.231) | 0.164 (0.100-0.239) | 0.175 (0.099-0.258) |
| Gabon                    | 0.006 (0.001-0.022) | 0.015 (0.004-0.036) | 0.025 (0.009-0.050) | 0.040 (0.019-0.072) | 0.056 (0.025-0.103) |
| Gambia                   | 0.002 (0.000-0.006) | 0.004 (0.001-0.009) | 0.008 (0.003-0.017) | 0.017 (0.008-0.031) | 0.029 (0.012-0.054) |
| Georgia                  | 0.017 (0.003-0.052) | 0.028 (0.009-0.064) | 0.030 (0.012-0.060) | 0.042 (0.020-0.075) | 0.062 (0.027-0.111) |

|                                  |                     |                     |                     |                     |                     |
|----------------------------------|---------------------|---------------------|---------------------|---------------------|---------------------|
| Germany                          | 0.013 (0.005-0.026) | 0.020 (0.013-0.030) | 0.028 (0.020-0.039) | 0.037 (0.026-0.052) | 0.046 (0.025-0.073) |
| Ghana                            | 0.003 (0.001-0.010) | 0.006 (0.002-0.013) | 0.012 (0.006-0.021) | 0.024 (0.013-0.038) | 0.040 (0.019-0.071) |
| Greece                           | 0.021 (0.006-0.052) | 0.031 (0.014-0.060) | 0.040 (0.020-0.068) | 0.053 (0.029-0.087) | 0.062 (0.029-0.109) |
| Greenland                        | 0.017 (0.005-0.039) | 0.026 (0.011-0.050) | 0.035 (0.018-0.061) | 0.046 (0.024-0.075) | 0.055 (0.027-0.097) |
| Grenada                          | 0.012 (0.002-0.033) | 0.021 (0.007-0.046) | 0.039 (0.017-0.070) | 0.063 (0.033-0.104) | 0.091 (0.044-0.157) |
| Guatemala                        | 0.009 (0.001-0.025) | 0.014 (0.005-0.031) | 0.023 (0.011-0.041) | 0.039 (0.022-0.062) | 0.057 (0.028-0.097) |
| Guinea                           | 0.001 (0.000-0.004) | 0.003 (0.001-0.007) | 0.005 (0.002-0.011) | 0.011 (0.005-0.020) | 0.020 (0.008-0.038) |
| Guinea Bissau                    | 0.001 (0.000-0.005) | 0.003 (0.001-0.008) | 0.007 (0.002-0.015) | 0.013 (0.006-0.025) | 0.022 (0.009-0.043) |
| Guyana                           | 0.014 (0.003-0.039) | 0.023 (0.008-0.050) | 0.037 (0.017-0.069) | 0.064 (0.032-0.108) | 0.090 (0.042-0.156) |
| Haiti                            | 0.004 (0.001-0.013) | 0.008 (0.002-0.018) | 0.014 (0.006-0.027) | 0.025 (0.012-0.045) | 0.040 (0.016-0.078) |
| Honduras                         | 0.006 (0.001-0.021) | 0.012 (0.003-0.027) | 0.022 (0.009-0.040) | 0.038 (0.020-0.062) | 0.059 (0.030-0.102) |
| Hungary                          | 0.029 (0.009-0.066) | 0.037 (0.018-0.063) | 0.040 (0.021-0.066) | 0.045 (0.024-0.074) | 0.051 (0.022-0.094) |
| Iceland                          | 0.015 (0.005-0.035) | 0.027 (0.013-0.048) | 0.033 (0.017-0.055) | 0.042 (0.022-0.069) | 0.049 (0.023-0.089) |
| India                            | 0.000 (0.000-0.001) | 0.001 (0.000-0.002) | 0.002 (0.001-0.003) | 0.004 (0.003-0.006) | 0.008 (0.004-0.014) |
| Indonesia                        | 0.000 (0.000-0.001) | 0.001 (0.000-0.001) | 0.002 (0.001-0.004) | 0.005 (0.003-0.009) | 0.012 (0.006-0.024) |
| Iran                             | 0.018 (0.005-0.044) | 0.026 (0.013-0.046) | 0.035 (0.023-0.051) | 0.051 (0.039-0.065) | 0.070 (0.044-0.102) |
| Iraq                             | 0.028 (0.007-0.071) | 0.040 (0.017-0.077) | 0.047 (0.023-0.081) | 0.063 (0.034-0.102) | 0.085 (0.043-0.141) |
| Ireland                          | 0.006 (0.002-0.016) | 0.014 (0.006-0.026) | 0.026 (0.013-0.043) | 0.046 (0.026-0.071) | 0.063 (0.032-0.103) |
| Israel                           | 0.031 (0.009-0.071) | 0.040 (0.019-0.071) | 0.050 (0.028-0.080) | 0.058 (0.034-0.089) | 0.066 (0.032-0.113) |
| Italy                            | 0.017 (0.006-0.037) | 0.023 (0.014-0.036) | 0.031 (0.021-0.043) | 0.042 (0.028-0.057) | 0.052 (0.028-0.084) |
| Jamaica                          | 0.020 (0.005-0.049) | 0.029 (0.014-0.053) | 0.047 (0.027-0.072) | 0.069 (0.043-0.100) | 0.093 (0.050-0.147) |
| Japan                            | 0.001 (0.000-0.002) | 0.001 (0.001-0.002) | 0.002 (0.001-0.003) | 0.003 (0.002-0.004) | 0.003 (0.002-0.006) |
| Jordan                           | 0.028 (0.008-0.068) | 0.052 (0.026-0.087) | 0.071 (0.045-0.105) | 0.093 (0.064-0.127) | 0.113 (0.070-0.164) |
| Kazakhstan                       | 0.015 (0.002-0.045) | 0.024 (0.008-0.052) | 0.033 (0.015-0.061) | 0.046 (0.022-0.080) | 0.065 (0.026-0.121) |
| Kenya                            | 0.001 (0.000-0.003) | 0.002 (0.001-0.005) | 0.005 (0.002-0.010) | 0.010 (0.004-0.019) | 0.021 (0.008-0.042) |
| Kiribati                         | 0.068 (0.023-0.140) | 0.082 (0.038-0.143) | 0.101 (0.053-0.161) | 0.126 (0.071-0.192) | 0.141 (0.071-0.225) |
| Kuwait                           | 0.076 (0.025-0.162) | 0.082 (0.045-0.134) | 0.093 (0.060-0.134) | 0.111 (0.076-0.152) | 0.127 (0.077-0.186) |
| Kyrgyzstan                       | 0.008 (0.001-0.026) | 0.013 (0.004-0.030) | 0.019 (0.008-0.036) | 0.027 (0.013-0.048) | 0.043 (0.019-0.079) |
| Lao PDR                          | 0.000 (0.000-0.000) | 0.000 (0.000-0.001) | 0.001 (0.000-0.002) | 0.002 (0.001-0.004) | 0.005 (0.002-0.012) |
| Latvia                           | 0.034 (0.008-0.086) | 0.045 (0.018-0.087) | 0.049 (0.023-0.087) | 0.055 (0.028-0.092) | 0.066 (0.029-0.119) |
| Lebanon                          | 0.027 (0.008-0.064) | 0.040 (0.017-0.075) | 0.052 (0.026-0.086) | 0.070 (0.037-0.112) | 0.090 (0.047-0.142) |
| Lesotho                          | 0.008 (0.001-0.028) | 0.014 (0.004-0.034) | 0.025 (0.011-0.051) | 0.042 (0.021-0.072) | 0.061 (0.028-0.107) |
| Liberia                          | 0.003 (0.000-0.009) | 0.005 (0.001-0.013) | 0.006 (0.002-0.014) | 0.012 (0.005-0.022) | 0.023 (0.010-0.044) |
| Libya                            | 0.043 (0.010-0.108) | 0.060 (0.028-0.106) | 0.069 (0.038-0.109) | 0.083 (0.049-0.124) | 0.099 (0.055-0.156) |
| Lithuania                        | 0.032 (0.009-0.076) | 0.045 (0.021-0.079) | 0.051 (0.028-0.082) | 0.059 (0.034-0.093) | 0.075 (0.036-0.129) |
| Luxembourg                       | 0.013 (0.003-0.033) | 0.020 (0.007-0.039) | 0.030 (0.012-0.058) | 0.040 (0.019-0.069) | 0.049 (0.021-0.088) |
| Macedonia (TFYR)                 | 0.019 (0.004-0.051) | 0.025 (0.010-0.052) | 0.031 (0.013-0.058) | 0.035 (0.016-0.064) | 0.042 (0.017-0.082) |
| Madagascar                       | 0.001 (0.000-0.004) | 0.002 (0.000-0.004) | 0.003 (0.001-0.007) | 0.006 (0.003-0.012) | 0.013 (0.005-0.027) |
| Malawi                           | 0.001 (0.000-0.003) | 0.001 (0.000-0.003) | 0.003 (0.001-0.006) | 0.006 (0.003-0.012) | 0.014 (0.005-0.028) |
| Malaysia                         | 0.001 (0.000-0.004) | 0.003 (0.001-0.007) | 0.008 (0.004-0.016) | 0.019 (0.011-0.031) | 0.033 (0.016-0.058) |
| Maldives                         | 0.000 (0.000-0.001) | 0.001 (0.000-0.003) | 0.004 (0.001-0.009) | 0.011 (0.005-0.023) | 0.021 (0.008-0.042) |
| Mali                             | 0.001 (0.000-0.004) | 0.003 (0.001-0.006) | 0.005 (0.002-0.011) | 0.011 (0.005-0.020) | 0.021 (0.009-0.040) |
| Malta                            | 0.028 (0.006-0.074) | 0.042 (0.018-0.078) | 0.052 (0.026-0.090) | 0.067 (0.035-0.109) | 0.077 (0.034-0.135) |
| Marshall Islands                 | 0.092 (0.032-0.183) | 0.112 (0.056-0.188) | 0.133 (0.077-0.201) | 0.144 (0.086-0.212) | 0.154 (0.080-0.239) |
| Mauritania                       | 0.002 (0.000-0.008) | 0.005 (0.001-0.013) | 0.011 (0.004-0.023) | 0.020 (0.009-0.036) | 0.032 (0.013-0.062) |
| Mauritius                        | 0.005 (0.001-0.015) | 0.010 (0.003-0.020) | 0.019 (0.009-0.035) | 0.036 (0.018-0.062) | 0.060 (0.026-0.109) |
| Mexico                           | 0.019 (0.004-0.049) | 0.031 (0.014-0.056) | 0.048 (0.030-0.069) | 0.068 (0.049-0.091) | 0.091 (0.055-0.134) |
| Micronesia (Federated States of) | 0.071 (0.024-0.145) | 0.089 (0.044-0.152) | 0.109 (0.063-0.166) | 0.128 (0.082-0.183) | 0.146 (0.086-0.216) |
| Moldova                          | 0.017 (0.003-0.047) | 0.024 (0.008-0.051) | 0.028 (0.012-0.053) | 0.032 (0.015-0.060) | 0.044 (0.019-0.084) |
| Mongolia                         | 0.008 (0.001-0.027) | 0.013 (0.004-0.032) | 0.019 (0.008-0.037) | 0.027 (0.013-0.046) | 0.041 (0.018-0.074) |
| Montenegro                       | 0.017 (0.003-0.052) | 0.027 (0.008-0.060) | 0.032 (0.013-0.062) | 0.039 (0.017-0.070) | 0.046 (0.017-0.087) |
| Morocco                          | 0.011 (0.002-0.032) | 0.019 (0.007-0.039) | 0.029 (0.014-0.051) | 0.044 (0.023-0.071) | 0.062 (0.030-0.108) |
| Mozambique                       | 0.001 (0.000-0.002) | 0.001 (0.000-0.004) | 0.003 (0.001-0.006) | 0.007 (0.003-0.013) | 0.013 (0.005-0.028) |
| Myanmar                          | 0.000 (0.000-0.001) | 0.000 (0.000-0.001) | 0.001 (0.000-0.002) | 0.003 (0.001-0.006) | 0.009 (0.003-0.018) |
| Namibia                          | 0.013 (0.002-0.045) | 0.019 (0.006-0.044) | 0.029 (0.013-0.052) | 0.045 (0.025-0.072) | 0.061 (0.031-0.102) |
| Nauru                            | 0.156 (0.084-0.245) | 0.163 (0.107-0.225) | 0.160 (0.110-0.219) | 0.152 (0.098-0.214) | 0.153 (0.079-0.245) |
| Nepal                            | 0.000 (0.000-0.001) | 0.001 (0.000-0.002) | 0.002 (0.001-0.004) | 0.004 (0.002-0.007) | 0.007 (0.003-0.016) |
| Netherlands                      | 0.010 (0.003-0.024) | 0.015 (0.008-0.026) | 0.024 (0.014-0.036) | 0.035 (0.023-0.051) | 0.043 (0.023-0.068) |
| New Zealand                      | 0.018 (0.007-0.038) | 0.029 (0.016-0.047) | 0.044 (0.027-0.065) | 0.065 (0.046-0.089) | 0.085 (0.056-0.119) |
| Nicaragua                        | 0.013 (0.002-0.037) | 0.020 (0.007-0.041) | 0.028 (0.014-0.050) | 0.045 (0.026-0.071) | 0.064 (0.032-0.110) |
| Niger                            | 0.001 (0.000-0.004) | 0.002 (0.000-0.005) | 0.004 (0.001-0.008) | 0.007 (0.003-0.014) | 0.013 (0.005-0.026) |
| Nigeria                          | 0.002 (0.000-0.006) | 0.004 (0.001-0.009) | 0.008 (0.004-0.013) | 0.017 (0.010-0.026) | 0.034 (0.018-0.055) |
| Niue                             | 0.077 (0.024-0.168) | 0.109 (0.051-0.187) | 0.135 (0.077-0.210) | 0.158 (0.101-0.228) | 0.179 (0.108-0.263) |
| North Korea                      | 0.001 (0.000-0.005) | 0.002 (0.000-0.005) | 0.002 (0.001-0.006) | 0.002 (0.000-0.007) | 0.004 (0.000-0.012) |
| Norway                           | 0.012 (0.004-0.026) | 0.022 (0.012-0.037) | 0.034 (0.021-0.051) | 0.048 (0.031-0.069) | 0.055 (0.029-0.091) |
| Occupied Palestinian Territory   | 0.028 (0.008-0.068) | 0.040 (0.018-0.075) | 0.053 (0.029-0.086) | 0.076 (0.045-0.114) | 0.095 (0.048-0.154) |
| Oman                             | 0.015 (0.003-0.039) | 0.028 (0.012-0.054) | 0.046 (0.025-0.072) | 0.063 (0.037-0.094) | 0.082 (0.043-0.132) |
| Pakistan                         | 0.001 (0.000-0.004) | 0.003 (0.001-0.006) | 0.005 (0.002-0.010) | 0.009 (0.004-0.017) | 0.015 (0.006-0.030) |
| Palau                            | 0.129 (0.051-0.238) | 0.138 (0.073-0.217) | 0.151 (0.090-0.225) | 0.163 (0.100-0.233) | 0.169 (0.095-0.258) |
| Panama                           | 0.014 (0.002-0.038) | 0.023 (0.007-0.049) | 0.036 (0.016-0.064) | 0.055 (0.031-0.087) | 0.081 (0.043-0.131) |
| Papua New Guinea                 | 0.015 (0.002-0.051) | 0.021 (0.005-0.054) | 0.032 (0.011-0.066) | 0.043 (0.018-0.081) | 0.061 (0.023-0.117) |

|                                  |                     |                     |                     |                     |                     |
|----------------------------------|---------------------|---------------------|---------------------|---------------------|---------------------|
| Paraguay                         | 0.006 (0.001-0.020) | 0.012 (0.003-0.029) | 0.024 (0.008-0.048) | 0.039 (0.016-0.072) | 0.058 (0.023-0.110) |
| Peru                             | 0.010 (0.001-0.029) | 0.016 (0.005-0.034) | 0.023 (0.011-0.040) | 0.035 (0.023-0.052) | 0.055 (0.033-0.083) |
| Philippines                      | 0.000 (0.000-0.001) | 0.001 (0.000-0.002) | 0.003 (0.001-0.005) | 0.006 (0.003-0.010) | 0.011 (0.004-0.023) |
| Poland                           | 0.031 (0.010-0.068) | 0.038 (0.021-0.064) | 0.044 (0.027-0.066) | 0.052 (0.034-0.075) | 0.061 (0.032-0.099) |
| Portugal                         | 0.008 (0.002-0.023) | 0.013 (0.005-0.027) | 0.022 (0.011-0.039) | 0.034 (0.019-0.055) | 0.044 (0.021-0.077) |
| Puerto Rico                      | 0.032 (0.008-0.074) | 0.054 (0.024-0.096) | 0.079 (0.043-0.126) | 0.101 (0.063-0.151) | 0.121 (0.069-0.187) |
| Qatar                            | 0.047 (0.014-0.105) | 0.078 (0.036-0.137) | 0.086 (0.049-0.132) | 0.106 (0.066-0.155) | 0.122 (0.071-0.186) |
| Romania                          | 0.019 (0.004-0.049) | 0.028 (0.011-0.056) | 0.034 (0.016-0.059) | 0.040 (0.019-0.069) | 0.050 (0.021-0.092) |
| Russian Federation               | 0.038 (0.014-0.079) | 0.049 (0.031-0.073) | 0.055 (0.041-0.071) | 0.062 (0.043-0.082) | 0.072 (0.039-0.115) |
| Rwanda                           | 0.000 (0.000-0.001) | 0.000 (0.000-0.002) | 0.001 (0.000-0.003) | 0.003 (0.001-0.007) | 0.008 (0.003-0.018) |
| Saint Kitts and Nevis            | 0.017 (0.004-0.045) | 0.032 (0.012-0.066) | 0.050 (0.023-0.088) | 0.075 (0.039-0.123) | 0.101 (0.047-0.174) |
| Saint Lucia                      | 0.011 (0.002-0.029) | 0.019 (0.007-0.038) | 0.036 (0.018-0.061) | 0.059 (0.032-0.096) | 0.090 (0.042-0.157) |
| Saint Vincent and the Grenadines | 0.012 (0.002-0.033) | 0.022 (0.007-0.046) | 0.039 (0.017-0.071) | 0.061 (0.031-0.101) | 0.083 (0.038-0.144) |
| Samoa                            | 0.081 (0.030-0.160) | 0.102 (0.053-0.165) | 0.130 (0.080-0.193) | 0.157 (0.107-0.217) | 0.175 (0.108-0.249) |
| Sao Tome and Principe            | 0.004 (0.004-0.012) | 0.007 (0.002-0.016) | 0.013 (0.005-0.028) | 0.022 (0.010-0.040) | 0.034 (0.014-0.064) |
| Saudi Arabia                     | 0.039 (0.011-0.090) | 0.058 (0.032-0.094) | 0.073 (0.050-0.101) | 0.090 (0.063-0.122) | 0.112 (0.070-0.163) |
| Senegal                          | 0.003 (0.000-0.009) | 0.005 (0.002-0.012) | 0.009 (0.004-0.018) | 0.017 (0.008-0.029) | 0.028 (0.012-0.053) |
| Serbia                           | 0.018 (0.004-0.045) | 0.024 (0.011-0.046) | 0.031 (0.017-0.050) | 0.036 (0.021-0.057) | 0.044 (0.021-0.075) |
| Seychelles                       | 0.010 (0.002-0.029) | 0.021 (0.008-0.043) | 0.036 (0.017-0.063) | 0.059 (0.031-0.095) | 0.084 (0.042-0.144) |
| Sierra Leone                     | 0.002 (0.000-0.008) | 0.004 (0.001-0.010) | 0.007 (0.003-0.015) | 0.013 (0.006-0.024) | 0.025 (0.011-0.046) |
| Singapore                        | 0.002 (0.000-0.006) | 0.004 (0.001-0.008) | 0.006 (0.003-0.011) | 0.008 (0.004-0.014) | 0.011 (0.005-0.022) |
| Slovakia                         | 0.016 (0.004-0.043) | 0.025 (0.010-0.047) | 0.032 (0.017-0.054) | 0.041 (0.023-0.065) | 0.057 (0.031-0.092) |
| Slovenia                         | 0.018 (0.004-0.051) | 0.027 (0.010-0.054) | 0.035 (0.016-0.063) | 0.044 (0.022-0.076) | 0.053 (0.023-0.096) |
| Solomon Islands                  | 0.013 (0.001-0.043) | 0.020 (0.005-0.052) | 0.031 (0.011-0.064) | 0.041 (0.018-0.075) | 0.055 (0.022-0.104) |
| Somalia                          | 0.001 (0.000-0.005) | 0.002 (0.000-0.006) | 0.004 (0.001-0.009) | 0.007 (0.002-0.015) | 0.012 (0.003-0.029) |
| South Africa                     | 0.046 (0.013-0.113) | 0.058 (0.028-0.105) | 0.071 (0.045-0.105) | 0.088 (0.063-0.116) | 0.106 (0.070-0.148) |
| South Korea                      | 0.000 (0.000-0.000) | 0.001 (0.000-0.001) | 0.002 (0.001-0.004) | 0.004 (0.002-0.006) | 0.007 (0.003-0.014) |
| Spain                            | 0.016 (0.005-0.036) | 0.024 (0.013-0.039) | 0.034 (0.023-0.048) | 0.047 (0.033-0.064) | 0.057 (0.031-0.090) |
| Sri Lanka                        | 0.000 (0.000-0.001) | 0.001 (0.000-0.002) | 0.002 (0.001-0.005) | 0.007 (0.003-0.012) | 0.016 (0.006-0.034) |
| Sudan                            | 0.002 (0.000-0.006) | 0.003 (0.001-0.009) | 0.007 (0.002-0.016) | 0.014 (0.006-0.029) | 0.025 (0.009-0.053) |
| Suriname                         | 0.024 (0.005-0.061) | 0.041 (0.015-0.080) | 0.050 (0.023-0.089) | 0.068 (0.035-0.113) | 0.090 (0.042-0.152) |
| Swaziland                        | 0.010 (0.001-0.034) | 0.019 (0.005-0.045) | 0.033 (0.013-0.064) | 0.050 (0.024-0.088) | 0.069 (0.030-0.124) |
| Sweden                           | 0.012 (0.004-0.027) | 0.018 (0.009-0.029) | 0.024 (0.015-0.036) | 0.033 (0.022-0.049) | 0.041 (0.021-0.068) |
| Switzerland                      | 0.010 (0.002-0.026) | 0.016 (0.007-0.031) | 0.026 (0.013-0.043) | 0.033 (0.018-0.053) | 0.039 (0.019-0.069) |
| Syrian Arab Republic             | 0.016 (0.003-0.044) | 0.028 (0.011-0.056) | 0.040 (0.019-0.069) | 0.057 (0.030-0.093) | 0.074 (0.036-0.129) |
| Taiwan                           | 0.001 (0.000-0.003) | 0.002 (0.001-0.006) | 0.005 (0.002-0.009) | 0.008 (0.003-0.014) | 0.011 (0.003-0.025) |
| Tajikistan                       | 0.010 (0.001-0.032) | 0.013 (0.003-0.033) | 0.016 (0.006-0.034) | 0.022 (0.009-0.042) | 0.037 (0.014-0.073) |
| Tanzania                         | 0.001 (0.000-0.004) | 0.002 (0.001-0.005) | 0.005 (0.002-0.009) | 0.010 (0.005-0.018) | 0.021 (0.010-0.038) |
| Thailand                         | 0.001 (0.000-0.003) | 0.002 (0.001-0.005) | 0.005 (0.002-0.010) | 0.013 (0.007-0.022) | 0.025 (0.011-0.048) |
| Timor-Leste                      | 0.000 (0.000-0.000) | 0.000 (0.000-0.001) | 0.001 (0.000-0.001) | 0.001 (0.000-0.003) | 0.004 (0.001-0.009) |
| Togo                             | 0.002 (0.000-0.006) | 0.003 (0.001-0.008) | 0.007 (0.003-0.014) | 0.014 (0.006-0.025) | 0.024 (0.011-0.045) |
| Tokelau                          | 0.075 (0.015-0.189) | 0.098 (0.036-0.191) | 0.124 (0.063-0.206) | 0.151 (0.089-0.225) | 0.174 (0.093-0.267) |
| Tonga                            | 0.088 (0.030-0.177) | 0.111 (0.055-0.184) | 0.136 (0.080-0.203) | 0.160 (0.105-0.224) | 0.176 (0.109-0.254) |
| Trinidad and Tobago              | 0.016 (0.002-0.052) | 0.027 (0.008-0.062) | 0.040 (0.018-0.075) | 0.069 (0.034-0.119) | 0.105 (0.041-0.192) |
| Tunisia                          | 0.018 (0.004-0.045) | 0.030 (0.013-0.056) | 0.044 (0.024-0.071) | 0.063 (0.039-0.094) | 0.084 (0.046-0.132) |
| Turkey                           | 0.021 (0.006-0.050) | 0.035 (0.019-0.058) | 0.054 (0.037-0.075) | 0.076 (0.057-0.098) | 0.098 (0.066-0.139) |
| Turkmenistan                     | 0.012 (0.002-0.035) | 0.017 (0.005-0.038) | 0.026 (0.010-0.049) | 0.037 (0.018-0.065) | 0.059 (0.026-0.108) |
| Tuvalu                           | 0.064 (0.021-0.135) | 0.089 (0.042-0.156) | 0.121 (0.067-0.191) | 0.141 (0.083-0.212) | 0.155 (0.082-0.242) |
| Uganda                           | 0.000 (0.000-0.002) | 0.001 (0.000-0.002) | 0.002 (0.000-0.004) | 0.005 (0.002-0.010) | 0.012 (0.005-0.025) |
| Ukraine                          | 0.029 (0.007-0.075) | 0.038 (0.014-0.075) | 0.043 (0.019-0.079) | 0.046 (0.021-0.082) | 0.056 (0.022-0.106) |
| United Arab Emirates             | 0.075 (0.019-0.172) | 0.078 (0.036-0.135) | 0.086 (0.050-0.130) | 0.107 (0.068-0.154) | 0.114 (0.063-0.179) |
| United Kingdom                   | 0.016 (0.006-0.031) | 0.025 (0.016-0.037) | 0.039 (0.030-0.050) | 0.058 (0.047-0.072) | 0.075 (0.053-0.100) |
| United States of America         | 0.027 (0.013-0.046) | 0.040 (0.026-0.057) | 0.059 (0.043-0.079) | 0.081 (0.061-0.102) | 0.097 (0.064-0.135) |
| Uruguay                          | 0.027 (0.006-0.070) | 0.037 (0.013-0.075) | 0.050 (0.024-0.088) | 0.067 (0.037-0.106) | 0.088 (0.045-0.144) |
| Uzbekistan                       | 0.009 (0.001-0.029) | 0.013 (0.004-0.032) | 0.020 (0.008-0.041) | 0.030 (0.013-0.054) | 0.047 (0.019-0.091) |
| Vanuatu                          | 0.019 (0.003-0.061) | 0.028 (0.008-0.066) | 0.040 (0.017-0.076) | 0.054 (0.027-0.092) | 0.071 (0.032-0.125) |
| Venezuela                        | 0.022 (0.004-0.057) | 0.031 (0.011-0.061) | 0.043 (0.022-0.072) | 0.059 (0.034-0.088) | 0.078 (0.041-0.126) |
| Viet Nam                         | 0.000 (0.000-0.000) | 0.000 (0.000-0.000) | 0.000 (0.000-0.001) | 0.001 (0.001-0.002) | 0.004 (0.001-0.008) |
| Yemen                            | 0.006 (0.001-0.019) | 0.010 (0.003-0.022) | 0.017 (0.007-0.032) | 0.028 (0.013-0.048) | 0.040 (0.017-0.073) |
| Zambia                           | 0.003 (0.001-0.011) | 0.006 (0.002-0.013) | 0.009 (0.004-0.017) | 0.015 (0.008-0.027) | 0.029 (0.013-0.052) |
| Zimbabwe                         | 0.013 (0.002-0.039) | 0.020 (0.008-0.043) | 0.031 (0.015-0.052) | 0.042 (0.023-0.067) | 0.051 (0.023-0.090) |

### Men, BMI $\geq 40$ kg/m<sup>2</sup>

| Country                  | Year                |                     |                     |                     |                     |
|--------------------------|---------------------|---------------------|---------------------|---------------------|---------------------|
|                          | 1975                | 1985                | 1995                | 2005                | 2014                |
| Afghanistan              | 0.000 (0.000-0.000) | 0.000 (0.000-0.000) | 0.000 (0.000-0.000) | 0.000 (0.000-0.000) | 0.000 (0.000-0.001) |
| Albania                  | 0.000 (0.000-0.002) | 0.001 (0.000-0.002) | 0.001 (0.000-0.003) | 0.002 (0.000-0.005) | 0.003 (0.000-0.010) |
| Algeria                  | 0.000 (0.000-0.002) | 0.001 (0.000-0.002) | 0.001 (0.000-0.004) | 0.003 (0.001-0.007) | 0.005 (0.001-0.015) |
| American Samoa           | 0.027 (0.007-0.068) | 0.044 (0.018-0.084) | 0.064 (0.031-0.114) | 0.078 (0.038-0.137) | 0.089 (0.030-0.178) |
| Andorra                  | 0.001 (0.000-0.003) | 0.002 (0.000-0.006) | 0.003 (0.001-0.011) | 0.008 (0.002-0.023) | 0.013 (0.002-0.040) |
| Angola                   | 0.000 (0.000-0.000) | 0.000 (0.000-0.000) | 0.000 (0.000-0.000) | 0.000 (0.000-0.002) | 0.002 (0.000-0.010) |
| Antigua and Barbuda      | 0.000 (0.000-0.001) | 0.001 (0.000-0.002) | 0.002 (0.000-0.008) | 0.009 (0.002-0.026) | 0.032 (0.005-0.091) |
| Argentina                | 0.001 (0.000-0.004) | 0.001 (0.000-0.005) | 0.003 (0.001-0.008) | 0.006 (0.002-0.013) | 0.013 (0.003-0.032) |
| Armenia                  | 0.002 (0.000-0.016) | 0.003 (0.000-0.011) | 0.003 (0.000-0.009) | 0.004 (0.001-0.011) | 0.007 (0.001-0.023) |
| Australia                | 0.001 (0.000-0.003) | 0.002 (0.001-0.003) | 0.004 (0.002-0.007) | 0.011 (0.006-0.018) | 0.022 (0.010-0.043) |
| Austria                  | 0.000 (0.000-0.001) | 0.001 (0.000-0.002) | 0.002 (0.001-0.005) | 0.005 (0.002-0.012) | 0.010 (0.002-0.027) |
| Azerbaijan               | 0.001 (0.000-0.007) | 0.001 (0.000-0.006) | 0.002 (0.000-0.006) | 0.003 (0.001-0.008) | 0.009 (0.001-0.027) |
| Bahamas                  | 0.001 (0.000-0.003) | 0.001 (0.000-0.005) | 0.004 (0.001-0.013) | 0.013 (0.003-0.033) | 0.029 (0.006-0.080) |
| Bahrain                  | 0.002 (0.000-0.009) | 0.002 (0.000-0.007) | 0.004 (0.001-0.010) | 0.008 (0.002-0.017) | 0.013 (0.003-0.034) |
| Bangladesh               | 0.000 (0.000-0.000) | 0.000 (0.000-0.000) | 0.000 (0.000-0.000) | 0.000 (0.000-0.000) | 0.000 (0.000-0.001) |
| Barbados                 | 0.000 (0.000-0.001) | 0.001 (0.000-0.002) | 0.002 (0.000-0.005) | 0.008 (0.002-0.021) | 0.027 (0.006-0.074) |
| Belarus                  | 0.001 (0.000-0.004) | 0.001 (0.000-0.005) | 0.002 (0.000-0.008) | 0.004 (0.001-0.014) | 0.009 (0.001-0.031) |
| Belgium                  | 0.000 (0.000-0.002) | 0.001 (0.000-0.002) | 0.001 (0.001-0.003) | 0.003 (0.001-0.006) | 0.005 (0.001-0.014) |
| Belize                   | 0.000 (0.000-0.002) | 0.000 (0.000-0.002) | 0.001 (0.000-0.004) | 0.005 (0.001-0.013) | 0.015 (0.003-0.044) |
| Benin                    | 0.000 (0.000-0.000) | 0.000 (0.000-0.000) | 0.000 (0.000-0.001) | 0.001 (0.000-0.002) | 0.003 (0.000-0.010) |
| Bermuda                  | 0.002 (0.000-0.010) | 0.003 (0.000-0.012) | 0.007 (0.001-0.022) | 0.019 (0.004-0.047) | 0.048 (0.011-0.118) |
| Bhutan                   | 0.000 (0.000-0.000) | 0.000 (0.000-0.000) | 0.000 (0.000-0.000) | 0.000 (0.000-0.001) | 0.001 (0.000-0.003) |
| Bolivia                  | 0.000 (0.000-0.001) | 0.000 (0.000-0.001) | 0.000 (0.000-0.002) | 0.001 (0.000-0.004) | 0.004 (0.000-0.015) |
| Bosnia and Herzegovina   | 0.000 (0.000-0.002) | 0.000 (0.000-0.002) | 0.001 (0.000-0.002) | 0.002 (0.000-0.005) | 0.003 (0.000-0.008) |
| Botswana                 | 0.000 (0.000-0.000) | 0.000 (0.000-0.000) | 0.001 (0.000-0.002) | 0.003 (0.000-0.008) | 0.009 (0.001-0.028) |
| Brazil                   | 0.000 (0.000-0.001) | 0.000 (0.000-0.001) | 0.001 (0.000-0.002) | 0.003 (0.001-0.005) | 0.006 (0.002-0.015) |
| Brunei Darussalam        | 0.000 (0.000-0.001) | 0.000 (0.000-0.002) | 0.001 (0.000-0.003) | 0.004 (0.001-0.013) | 0.015 (0.002-0.050) |
| Bulgaria                 | 0.001 (0.000-0.004) | 0.001 (0.000-0.005) | 0.002 (0.000-0.007) | 0.004 (0.001-0.010) | 0.006 (0.001-0.020) |
| Burkina Faso             | 0.000 (0.000-0.000) | 0.000 (0.000-0.000) | 0.000 (0.000-0.000) | 0.000 (0.000-0.001) | 0.002 (0.000-0.006) |
| Burundi                  | 0.000 (0.000-0.000) | 0.000 (0.000-0.000) | 0.000 (0.000-0.000) | 0.000 (0.000-0.000) | 0.000 (0.000-0.001) |
| Cabo Verde               | 0.000 (0.000-0.000) | 0.000 (0.000-0.000) | 0.000 (0.000-0.001) | 0.002 (0.000-0.005) | 0.007 (0.001-0.023) |
| Cambodia                 | 0.000 (0.000-0.000) | 0.000 (0.000-0.000) | 0.000 (0.000-0.000) | 0.000 (0.000-0.000) | 0.000 (0.000-0.002) |
| Cameroon                 | 0.000 (0.000-0.000) | 0.000 (0.000-0.000) | 0.000 (0.000-0.001) | 0.001 (0.000-0.003) | 0.005 (0.001-0.014) |
| Canada                   | 0.001 (0.000-0.002) | 0.002 (0.001-0.004) | 0.006 (0.003-0.012) | 0.014 (0.007-0.024) | 0.023 (0.007-0.047) |
| Central African Republic | 0.000 (0.000-0.000) | 0.000 (0.000-0.000) | 0.000 (0.000-0.000) | 0.000 (0.000-0.001) | 0.000 (0.000-0.002) |
| Chad                     | 0.000 (0.000-0.000) | 0.000 (0.000-0.000) | 0.000 (0.000-0.001) | 0.001 (0.000-0.003) | 0.005 (0.001-0.016) |
| Chile                    | 0.001 (0.000-0.003) | 0.001 (0.000-0.003) | 0.002 (0.001-0.005) | 0.005 (0.002-0.011) | 0.012 (0.003-0.028) |
| China                    | 0.000 (0.000-0.000) | 0.000 (0.000-0.000) | 0.000 (0.000-0.000) | 0.000 (0.000-0.000) | 0.001 (0.000-0.004) |
| China (Hong Kong SAR)    | 0.000 (0.000-0.001) | 0.000 (0.000-0.001) | 0.000 (0.000-0.001) | 0.001 (0.000-0.003) | 0.003 (0.000-0.012) |
| Colombia                 | 0.000 (0.000-0.001) | 0.000 (0.000-0.002) | 0.001 (0.000-0.003) | 0.003 (0.001-0.005) | 0.006 (0.002-0.016) |
| Comoros                  | 0.000 (0.000-0.000) | 0.000 (0.000-0.000) | 0.000 (0.000-0.000) | 0.000 (0.000-0.001) | 0.001 (0.000-0.003) |
| Congo                    | 0.000 (0.000-0.000) | 0.000 (0.000-0.000) | 0.000 (0.000-0.001) | 0.000 (0.000-0.002) | 0.002 (0.000-0.008) |
| Cook Islands             | 0.012 (0.001-0.042) | 0.021 (0.005-0.052) | 0.042 (0.014-0.088) | 0.068 (0.028-0.125) | 0.092 (0.033-0.177) |
| Costa Rica               | 0.000 (0.000-0.001) | 0.000 (0.000-0.002) | 0.001 (0.000-0.005) | 0.005 (0.001-0.011) | 0.012 (0.003-0.032) |
| Cote d'Ivoire            | 0.000 (0.000-0.000) | 0.000 (0.000-0.001) | 0.000 (0.000-0.001) | 0.001 (0.000-0.004) | 0.005 (0.001-0.016) |
| Croatia                  | 0.001 (0.000-0.003) | 0.001 (0.000-0.004) | 0.002 (0.000-0.007) | 0.004 (0.001-0.012) | 0.007 (0.001-0.023) |
| Cuba                     | 0.000 (0.000-0.002) | 0.001 (0.000-0.003) | 0.002 (0.000-0.006) | 0.006 (0.002-0.014) | 0.019 (0.005-0.045) |
| Cyprus                   | 0.000 (0.000-0.000) | 0.000 (0.000-0.002) | 0.002 (0.000-0.007) | 0.007 (0.002-0.019) | 0.014 (0.002-0.042) |
| Czech Republic           | 0.002 (0.000-0.007) | 0.003 (0.001-0.007) | 0.004 (0.001-0.008) | 0.006 (0.002-0.012) | 0.008 (0.002-0.023) |
| Denmark                  | 0.000 (0.000-0.001) | 0.001 (0.000-0.002) | 0.002 (0.001-0.005) | 0.005 (0.002-0.010) | 0.008 (0.002-0.019) |
| Djibouti                 | 0.000 (0.000-0.001) | 0.000 (0.000-0.001) | 0.000 (0.000-0.002) | 0.001 (0.000-0.002) | 0.002 (0.000-0.007) |
| Dominica                 | 0.000 (0.000-0.001) | 0.000 (0.000-0.001) | 0.001 (0.000-0.004) | 0.004 (0.001-0.012) | 0.013 (0.002-0.039) |
| Dominican Republic       | 0.000 (0.000-0.000) | 0.000 (0.000-0.001) | 0.001 (0.000-0.002) | 0.003 (0.001-0.008) | 0.012 (0.003-0.032) |
| DR Congo                 | 0.000 (0.000-0.000) | 0.000 (0.000-0.000) | 0.000 (0.000-0.000) | 0.000 (0.000-0.000) | 0.000 (0.000-0.002) |
| Ecuador                  | 0.000 (0.000-0.001) | 0.000 (0.000-0.001) | 0.001 (0.000-0.002) | 0.002 (0.000-0.005) | 0.005 (0.001-0.016) |
| Egypt                    | 0.001 (0.000-0.007) | 0.002 (0.000-0.007) | 0.005 (0.002-0.011) | 0.010 (0.004-0.019) | 0.018 (0.005-0.041) |
| El Salvador              | 0.000 (0.000-0.002) | 0.000 (0.000-0.002) | 0.001 (0.000-0.004) | 0.004 (0.001-0.011) | 0.009 (0.001-0.027) |
| Equatorial Guinea        | 0.000 (0.000-0.000) | 0.000 (0.000-0.000) | 0.000 (0.000-0.000) | 0.002 (0.000-0.007) | 0.009 (0.000-0.039) |
| Eritrea                  | 0.000 (0.000-0.000) | 0.000 (0.000-0.000) | 0.000 (0.000-0.000) | 0.000 (0.000-0.000) | 0.000 (0.000-0.002) |
| Estonia                  | 0.001 (0.000-0.006) | 0.002 (0.000-0.006) | 0.003 (0.001-0.007) | 0.005 (0.003-0.010) | 0.009 (0.003-0.020) |
| Ethiopia                 | 0.000 (0.000-0.000) | 0.000 (0.000-0.000) | 0.000 (0.000-0.000) | 0.000 (0.000-0.000) | 0.000 (0.000-0.001) |
| Fiji                     | 0.002 (0.000-0.016) | 0.003 (0.000-0.016) | 0.006 (0.001-0.018) | 0.010 (0.003-0.025) | 0.018 (0.004-0.046) |
| Finland                  | 0.000 (0.000-0.001) | 0.001 (0.000-0.002) | 0.002 (0.001-0.005) | 0.005 (0.003-0.009) | 0.009 (0.003-0.019) |
| France                   | 0.000 (0.000-0.001) | 0.000 (0.000-0.001) | 0.001 (0.000-0.003) | 0.004 (0.001-0.008) | 0.008 (0.002-0.021) |
| French Polynesia         | 0.012 (0.001-0.044) | 0.021 (0.004-0.059) | 0.038 (0.010-0.088) | 0.059 (0.022-0.112) | 0.082 (0.030-0.154) |



|                                  |                     |                     |                     |                     |                     |
|----------------------------------|---------------------|---------------------|---------------------|---------------------|---------------------|
| Gabon                            | 0.000 (0.000-0.000) | 0.000 (0.000-0.001) | 0.001 (0.000-0.003) | 0.002 (0.000-0.007) | 0.005 (0.000-0.020) |
| Gambia                           | 0.000 (0.000-0.000) | 0.000 (0.000-0.000) | 0.000 (0.000-0.001) | 0.001 (0.000-0.003) | 0.003 (0.000-0.011) |
| Georgia                          | 0.002 (0.000-0.011) | 0.003 (0.000-0.011) | 0.003 (0.000-0.010) | 0.004 (0.001-0.012) | 0.009 (0.001-0.026) |
| Germany                          | 0.000 (0.000-0.001) | 0.001 (0.000-0.001) | 0.002 (0.001-0.004) | 0.005 (0.003-0.009) | 0.009 (0.003-0.021) |
| Ghana                            | 0.000 (0.000-0.000) | 0.000 (0.000-0.001) | 0.000 (0.000-0.002) | 0.002 (0.001-0.006) | 0.010 (0.002-0.029) |
| Greece                           | 0.000 (0.000-0.001) | 0.001 (0.000-0.002) | 0.002 (0.000-0.006) | 0.005 (0.001-0.013) | 0.010 (0.002-0.028) |
| Greenland                        | 0.000 (0.000-0.002) | 0.001 (0.000-0.003) | 0.003 (0.001-0.008) | 0.006 (0.002-0.015) | 0.011 (0.002-0.030) |
| Grenada                          | 0.000 (0.000-0.000) | 0.000 (0.000-0.001) | 0.001 (0.000-0.003) | 0.004 (0.001-0.010) | 0.013 (0.002-0.037) |
| Guatemala                        | 0.000 (0.000-0.001) | 0.000 (0.000-0.001) | 0.001 (0.000-0.002) | 0.002 (0.000-0.006) | 0.006 (0.001-0.019) |
| Guinea                           | 0.000 (0.000-0.000) | 0.000 (0.000-0.000) | 0.000 (0.000-0.001) | 0.001 (0.000-0.002) | 0.002 (0.000-0.007) |
| Guinea Bissau                    | 0.000 (0.000-0.000) | 0.000 (0.000-0.000) | 0.000 (0.000-0.001) | 0.001 (0.000-0.002) | 0.003 (0.000-0.009) |
| Guyana                           | 0.000 (0.000-0.001) | 0.000 (0.000-0.002) | 0.001 (0.000-0.004) | 0.006 (0.001-0.015) | 0.019 (0.004-0.053) |
| Haiti                            | 0.000 (0.000-0.000) | 0.000 (0.000-0.000) | 0.000 (0.000-0.001) | 0.001 (0.000-0.004) | 0.004 (0.000-0.014) |
| Honduras                         | 0.000 (0.000-0.001) | 0.000 (0.000-0.001) | 0.001 (0.000-0.002) | 0.002 (0.000-0.005) | 0.005 (0.001-0.017) |
| Hungary                          | 0.002 (0.000-0.008) | 0.003 (0.001-0.008) | 0.005 (0.002-0.011) | 0.007 (0.002-0.016) | 0.010 (0.002-0.028) |
| Iceland                          | 0.001 (0.000-0.002) | 0.001 (0.000-0.004) | 0.003 (0.001-0.007) | 0.006 (0.002-0.014) | 0.010 (0.002-0.028) |
| India                            | 0.000 (0.000-0.000) | 0.000 (0.000-0.000) | 0.000 (0.000-0.000) | 0.000 (0.000-0.000) | 0.000 (0.000-0.001) |
| Indonesia                        | 0.000 (0.000-0.000) | 0.000 (0.000-0.000) | 0.000 (0.000-0.000) | 0.000 (0.000-0.001) | 0.002 (0.000-0.005) |
| Iran                             | 0.000 (0.000-0.002) | 0.001 (0.000-0.002) | 0.001 (0.000-0.002) | 0.002 (0.001-0.004) | 0.005 (0.002-0.011) |
| Iraq                             | 0.001 (0.000-0.004) | 0.001 (0.000-0.004) | 0.001 (0.000-0.004) | 0.003 (0.001-0.008) | 0.006 (0.001-0.019) |
| Ireland                          | 0.000 (0.000-0.001) | 0.001 (0.000-0.002) | 0.002 (0.001-0.006) | 0.009 (0.003-0.019) | 0.021 (0.006-0.046) |
| Israel                           | 0.000 (0.000-0.002) | 0.001 (0.000-0.003) | 0.002 (0.000-0.005) | 0.004 (0.001-0.009) | 0.008 (0.001-0.022) |
| Italy                            | 0.000 (0.000-0.000) | 0.000 (0.000-0.001) | 0.001 (0.000-0.002) | 0.003 (0.001-0.006) | 0.007 (0.002-0.016) |
| Jamaica                          | 0.000 (0.000-0.001) | 0.000 (0.000-0.001) | 0.001 (0.000-0.002) | 0.003 (0.001-0.008) | 0.013 (0.003-0.037) |
| Japan                            | 0.000 (0.000-0.000) | 0.000 (0.000-0.000) | 0.000 (0.000-0.000) | 0.000 (0.000-0.000) | 0.000 (0.000-0.000) |
| Jordan                           | 0.001 (0.000-0.007) | 0.002 (0.000-0.007) | 0.005 (0.001-0.011) | 0.008 (0.003-0.016) | 0.014 (0.004-0.034) |
| Kazakhstan                       | 0.002 (0.000-0.010) | 0.003 (0.000-0.010) | 0.004 (0.001-0.013) | 0.007 (0.001-0.020) | 0.014 (0.002-0.044) |
| Kenya                            | 0.000 (0.000-0.000) | 0.000 (0.000-0.000) | 0.000 (0.000-0.000) | 0.000 (0.000-0.001) | 0.001 (0.000-0.005) |
| Kiribati                         | 0.004 (0.000-0.016) | 0.008 (0.002-0.023) | 0.015 (0.004-0.037) | 0.026 (0.008-0.058) | 0.037 (0.008-0.093) |
| Kuwait                           | 0.004 (0.000-0.019) | 0.006 (0.002-0.015) | 0.010 (0.004-0.020) | 0.017 (0.008-0.031) | 0.028 (0.009-0.059) |
| Kyrgyzstan                       | 0.001 (0.000-0.005) | 0.001 (0.000-0.004) | 0.001 (0.000-0.004) | 0.002 (0.000-0.006) | 0.003 (0.000-0.011) |
| Lao PDR                          | 0.000 (0.000-0.000) | 0.000 (0.000-0.000) | 0.000 (0.000-0.000) | 0.000 (0.000-0.000) | 0.001 (0.000-0.003) |
| Latvia                           | 0.001 (0.000-0.007) | 0.002 (0.000-0.008) | 0.004 (0.001-0.010) | 0.006 (0.002-0.015) | 0.011 (0.002-0.032) |
| Lebanon                          | 0.001 (0.000-0.005) | 0.002 (0.000-0.006) | 0.002 (0.000-0.007) | 0.004 (0.001-0.012) | 0.010 (0.002-0.026) |
| Lesotho                          | 0.000 (0.000-0.000) | 0.000 (0.000-0.000) | 0.000 (0.000-0.001) | 0.001 (0.000-0.003) | 0.004 (0.001-0.011) |
| Liberia                          | 0.000 (0.000-0.000) | 0.000 (0.000-0.001) | 0.000 (0.000-0.001) | 0.001 (0.000-0.002) | 0.003 (0.000-0.010) |
| Libya                            | 0.001 (0.000-0.007) | 0.002 (0.000-0.008) | 0.004 (0.001-0.010) | 0.006 (0.002-0.015) | 0.011 (0.003-0.029) |
| Lithuania                        | 0.001 (0.000-0.005) | 0.002 (0.001-0.006) | 0.004 (0.001-0.010) | 0.007 (0.003-0.016) | 0.015 (0.003-0.039) |
| Luxembourg                       | 0.000 (0.000-0.002) | 0.001 (0.000-0.003) | 0.003 (0.000-0.008) | 0.007 (0.002-0.016) | 0.012 (0.003-0.033) |
| Macedonia (TFYR)                 | 0.001 (0.000-0.004) | 0.001 (0.000-0.004) | 0.002 (0.000-0.007) | 0.003 (0.001-0.009) | 0.004 (0.001-0.014) |
| Madagascar                       | 0.000 (0.000-0.000) | 0.000 (0.000-0.000) | 0.000 (0.000-0.000) | 0.000 (0.000-0.001) | 0.001 (0.000-0.004) |
| Malawi                           | 0.000 (0.000-0.000) | 0.000 (0.000-0.000) | 0.000 (0.000-0.000) | 0.000 (0.000-0.000) | 0.000 (0.000-0.002) |
| Malaysia                         | 0.000 (0.000-0.000) | 0.000 (0.000-0.000) | 0.000 (0.000-0.001) | 0.002 (0.001-0.005) | 0.011 (0.003-0.028) |
| Maldives                         | 0.000 (0.000-0.000) | 0.000 (0.000-0.000) | 0.000 (0.000-0.000) | 0.000 (0.000-0.002) | 0.003 (0.000-0.009) |
| Mali                             | 0.000 (0.000-0.000) | 0.000 (0.000-0.000) | 0.000 (0.000-0.001) | 0.001 (0.000-0.003) | 0.004 (0.000-0.012) |
| Malta                            | 0.001 (0.000-0.006) | 0.002 (0.000-0.006) | 0.004 (0.001-0.012) | 0.009 (0.002-0.023) | 0.016 (0.003-0.046) |
| Marshall Islands                 | 0.011 (0.001-0.042) | 0.017 (0.003-0.047) | 0.028 (0.008-0.063) | 0.037 (0.012-0.077) | 0.048 (0.011-0.112) |
| Mauritania                       | 0.000 (0.000-0.000) | 0.000 (0.000-0.000) | 0.000 (0.000-0.001) | 0.001 (0.000-0.004) | 0.005 (0.001-0.015) |
| Mauritius                        | 0.000 (0.000-0.000) | 0.000 (0.000-0.000) | 0.000 (0.000-0.001) | 0.001 (0.000-0.004) | 0.007 (0.001-0.021) |
| Mexico                           | 0.001 (0.000-0.003) | 0.001 (0.000-0.004) | 0.003 (0.001-0.007) | 0.008 (0.004-0.013) | 0.016 (0.006-0.034) |
| Micronesia (Federated States of) | 0.006 (0.000-0.024) | 0.011 (0.003-0.031) | 0.021 (0.007-0.046) | 0.036 (0.016-0.066) | 0.058 (0.022-0.113) |
| Moldova                          | 0.000 (0.000-0.002) | 0.001 (0.000-0.003) | 0.001 (0.000-0.004) | 0.002 (0.000-0.006) | 0.004 (0.001-0.014) |
| Mongolia                         | 0.001 (0.000-0.006) | 0.001 (0.000-0.004) | 0.001 (0.000-0.004) | 0.002 (0.001-0.005) | 0.005 (0.001-0.013) |
| Montenegro                       | 0.000 (0.000-0.003) | 0.001 (0.000-0.004) | 0.002 (0.000-0.006) | 0.003 (0.001-0.009) | 0.005 (0.001-0.016) |
| Morocco                          | 0.000 (0.000-0.002) | 0.000 (0.000-0.002) | 0.001 (0.000-0.003) | 0.002 (0.000-0.005) | 0.004 (0.001-0.014) |
| Mozambique                       | 0.000 (0.000-0.000) | 0.000 (0.000-0.000) | 0.000 (0.000-0.000) | 0.000 (0.000-0.000) | 0.000 (0.000-0.001) |
| Myanmar                          | 0.000 (0.000-0.000) | 0.000 (0.000-0.000) | 0.000 (0.000-0.000) | 0.000 (0.000-0.000) | 0.001 (0.000-0.002) |
| Namibia                          | 0.000 (0.000-0.000) | 0.000 (0.000-0.001) | 0.000 (0.000-0.001) | 0.002 (0.000-0.005) | 0.006 (0.001-0.019) |
| Nauru                            | 0.051 (0.013-0.114) | 0.066 (0.031-0.116) | 0.078 (0.041-0.127) | 0.075 (0.037-0.127) | 0.079 (0.023-0.164) |
| Nepal                            | 0.000 (0.000-0.000) | 0.000 (0.000-0.000) | 0.000 (0.000-0.000) | 0.000 (0.000-0.000) | 0.000 (0.000-0.001) |
| Netherlands                      | 0.000 (0.000-0.001) | 0.000 (0.000-0.001) | 0.001 (0.000-0.003) | 0.003 (0.001-0.006) | 0.005 (0.001-0.013) |
| New Zealand                      | 0.001 (0.000-0.003) | 0.002 (0.001-0.005) | 0.005 (0.002-0.011) | 0.014 (0.007-0.023) | 0.026 (0.012-0.047) |
| Nicaragua                        | 0.000 (0.000-0.002) | 0.001 (0.000-0.003) | 0.001 (0.000-0.005) | 0.003 (0.001-0.010) | 0.008 (0.001-0.025) |
| Niger                            | 0.000 (0.000-0.000) | 0.000 (0.000-0.000) | 0.000 (0.000-0.001) | 0.001 (0.000-0.002) | 0.002 (0.000-0.007) |
| Nigeria                          | 0.000 (0.000-0.000) | 0.000 (0.000-0.000) | 0.000 (0.000-0.001) | 0.001 (0.000-0.003) | 0.008 (0.002-0.020) |
| Niue                             | 0.004 (0.000-0.020) | 0.011 (0.002-0.033) | 0.025 (0.006-0.060) | 0.048 (0.018-0.093) | 0.081 (0.030-0.154) |
| North Korea                      | 0.000 (0.000-0.000) | 0.000 (0.000-0.000) | 0.000 (0.000-0.000) | 0.000 (0.000-0.000) | 0.000 (0.000-0.001) |
| Norway                           | 0.000 (0.000-0.002) | 0.001 (0.000-0.003) | 0.004 (0.002-0.008) | 0.010 (0.005-0.019) | 0.018 (0.005-0.039) |

|                                  |                     |                     |                     |                     |                     |
|----------------------------------|---------------------|---------------------|---------------------|---------------------|---------------------|
| Occupied Palestinian Territory   | 0.001 (0.000-0.005) | 0.001 (0.000-0.005) | 0.002 (0.000-0.006) | 0.004 (0.001-0.010) | 0.008 (0.002-0.022) |
| Oman                             | 0.000 (0.000-0.002) | 0.001 (0.000-0.004) | 0.004 (0.001-0.008) | 0.008 (0.003-0.017) | 0.018 (0.005-0.043) |
| Pakistan                         | 0.000 (0.000-0.000) | 0.000 (0.000-0.000) | 0.000 (0.000-0.001) | 0.000 (0.000-0.001) | 0.001 (0.000-0.004) |
| Palau                            | 0.014 (0.001-0.055) | 0.024 (0.005-0.061) | 0.040 (0.013-0.090) | 0.057 (0.022-0.109) | 0.069 (0.023-0.137) |
| Panama                           | 0.000 (0.000-0.002) | 0.001 (0.000-0.003) | 0.002 (0.000-0.006) | 0.006 (0.002-0.013) | 0.017 (0.004-0.043) |
| Papua New Guinea                 | 0.001 (0.000-0.007) | 0.001 (0.000-0.006) | 0.002 (0.000-0.008) | 0.004 (0.001-0.012) | 0.008 (0.001-0.029) |
| Paraguay                         | 0.000 (0.000-0.001) | 0.000 (0.000-0.001) | 0.001 (0.000-0.003) | 0.002 (0.000-0.007) | 0.006 (0.001-0.020) |
| Peru                             | 0.000 (0.000-0.001) | 0.000 (0.000-0.002) | 0.001 (0.000-0.003) | 0.002 (0.001-0.004) | 0.005 (0.001-0.015) |
| Philippines                      | 0.000 (0.000-0.000) | 0.000 (0.000-0.000) | 0.000 (0.000-0.000) | 0.000 (0.000-0.001) | 0.002 (0.000-0.006) |
| Poland                           | 0.001 (0.000-0.004) | 0.001 (0.000-0.003) | 0.002 (0.001-0.004) | 0.004 (0.002-0.007) | 0.006 (0.002-0.015) |
| Portugal                         | 0.000 (0.000-0.000) | 0.000 (0.000-0.000) | 0.001 (0.000-0.002) | 0.002 (0.001-0.005) | 0.006 (0.001-0.016) |
| Puerto Rico                      | 0.000 (0.000-0.003) | 0.002 (0.000-0.006) | 0.006 (0.001-0.017) | 0.018 (0.006-0.039) | 0.038 (0.010-0.091) |
| Qatar                            | 0.004 (0.000-0.017) | 0.007 (0.001-0.023) | 0.011 (0.003-0.026) | 0.021 (0.008-0.043) | 0.036 (0.012-0.078) |
| Romania                          | 0.001 (0.000-0.004) | 0.001 (0.000-0.005) | 0.003 (0.001-0.007) | 0.004 (0.001-0.011) | 0.007 (0.001-0.021) |
| Russian Federation               | 0.000 (0.000-0.002) | 0.001 (0.000-0.002) | 0.002 (0.001-0.003) | 0.003 (0.001-0.005) | 0.006 (0.001-0.018) |
| Rwanda                           | 0.000 (0.000-0.000) | 0.000 (0.000-0.000) | 0.000 (0.000-0.000) | 0.000 (0.000-0.000) | 0.000 (0.000-0.001) |
| Saint Kitts and Nevis            | 0.000 (0.000-0.001) | 0.001 (0.000-0.003) | 0.002 (0.000-0.007) | 0.010 (0.002-0.025) | 0.033 (0.007-0.084) |
| Saint Lucia                      | 0.000 (0.000-0.000) | 0.000 (0.000-0.001) | 0.001 (0.000-0.003) | 0.004 (0.001-0.012) | 0.020 (0.004-0.055) |
| Saint Vincent and the Grenadines | 0.000 (0.000-0.001) | 0.000 (0.000-0.001) | 0.001 (0.000-0.004) | 0.005 (0.001-0.014) | 0.015 (0.002-0.045) |
| Samoa                            | 0.005 (0.000-0.019) | 0.010 (0.002-0.025) | 0.021 (0.007-0.043) | 0.041 (0.019-0.072) | 0.064 (0.025-0.122) |
| Sao Tome and Principe            | 0.000 (0.000-0.001) | 0.000 (0.000-0.001) | 0.001 (0.000-0.003) | 0.002 (0.001-0.007) | 0.008 (0.001-0.022) |
| Saudi Arabia                     | 0.002 (0.000-0.008) | 0.004 (0.001-0.010) | 0.008 (0.004-0.014) | 0.014 (0.007-0.025) | 0.027 (0.010-0.057) |
| Senegal                          | 0.000 (0.000-0.000) | 0.000 (0.000-0.001) | 0.000 (0.000-0.001) | 0.001 (0.000-0.003) | 0.004 (0.001-0.012) |
| Serbia                           | 0.000 (0.000-0.002) | 0.001 (0.000-0.002) | 0.001 (0.000-0.003) | 0.002 (0.001-0.005) | 0.003 (0.001-0.009) |
| Seychelles                       | 0.000 (0.000-0.001) | 0.000 (0.000-0.001) | 0.001 (0.000-0.003) | 0.004 (0.001-0.009) | 0.012 (0.002-0.033) |
| Sierra Leone                     | 0.000 (0.000-0.000) | 0.000 (0.000-0.001) | 0.000 (0.000-0.001) | 0.001 (0.000-0.003) | 0.005 (0.001-0.013) |
| Singapore                        | 0.000 (0.000-0.000) | 0.000 (0.000-0.000) | 0.000 (0.000-0.000) | 0.000 (0.000-0.001) | 0.001 (0.000-0.003) |
| Slovakia                         | 0.000 (0.000-0.002) | 0.001 (0.000-0.002) | 0.001 (0.000-0.004) | 0.003 (0.001-0.006) | 0.006 (0.001-0.015) |
| Slovenia                         | 0.000 (0.000-0.002) | 0.001 (0.000-0.003) | 0.002 (0.000-0.006) | 0.003 (0.001-0.009) | 0.006 (0.001-0.018) |
| Solomon Islands                  | 0.001 (0.000-0.009) | 0.002 (0.000-0.009) | 0.003 (0.000-0.012) | 0.006 (0.001-0.015) | 0.010 (0.002-0.031) |
| Somalia                          | 0.000 (0.000-0.000) | 0.000 (0.000-0.000) | 0.000 (0.000-0.000) | 0.000 (0.000-0.001) | 0.000 (0.000-0.002) |
| South Africa                     | 0.000 (0.000-0.002) | 0.001 (0.000-0.003) | 0.003 (0.001-0.006) | 0.008 (0.004-0.014) | 0.017 (0.006-0.034) |
| South Korea                      | 0.000 (0.000-0.000) | 0.000 (0.000-0.000) | 0.000 (0.000-0.000) | 0.000 (0.000-0.000) | 0.000 (0.000-0.001) |
| Spain                            | 0.000 (0.000-0.001) | 0.000 (0.000-0.001) | 0.002 (0.001-0.003) | 0.005 (0.002-0.008) | 0.009 (0.002-0.022) |
| Sri Lanka                        | 0.000 (0.000-0.000) | 0.000 (0.000-0.000) | 0.000 (0.000-0.000) | 0.000 (0.000-0.001) | 0.002 (0.000-0.009) |
| Sudan                            | 0.000 (0.000-0.000) | 0.000 (0.000-0.000) | 0.000 (0.000-0.000) | 0.000 (0.000-0.001) | 0.001 (0.000-0.004) |
| Suriname                         | 0.000 (0.000-0.002) | 0.001 (0.000-0.003) | 0.002 (0.000-0.007) | 0.006 (0.001-0.017) | 0.019 (0.003-0.057) |
| Swaziland                        | 0.000 (0.000-0.000) | 0.000 (0.000-0.001) | 0.000 (0.000-0.002) | 0.002 (0.000-0.005) | 0.006 (0.001-0.021) |
| Sweden                           | 0.000 (0.000-0.001) | 0.001 (0.000-0.002) | 0.002 (0.001-0.004) | 0.005 (0.003-0.009) | 0.009 (0.002-0.020) |
| Switzerland                      | 0.000 (0.000-0.001) | 0.001 (0.000-0.002) | 0.002 (0.001-0.005) | 0.006 (0.002-0.011) | 0.011 (0.004-0.025) |
| Syrian Arab Republic             | 0.001 (0.000-0.003) | 0.001 (0.000-0.003) | 0.002 (0.000-0.005) | 0.003 (0.001-0.009) | 0.006 (0.001-0.019) |
| Taiwan                           | 0.000 (0.000-0.000) | 0.000 (0.000-0.000) | 0.000 (0.000-0.000) | 0.000 (0.000-0.001) | 0.002 (0.000-0.007) |
| Tajikistan                       | 0.001 (0.000-0.005) | 0.001 (0.000-0.004) | 0.001 (0.000-0.004) | 0.001 (0.000-0.005) | 0.003 (0.000-0.013) |
| Tanzania                         | 0.000 (0.000-0.000) | 0.000 (0.000-0.000) | 0.000 (0.000-0.000) | 0.000 (0.000-0.001) | 0.001 (0.000-0.002) |
| Thailand                         | 0.000 (0.000-0.000) | 0.000 (0.000-0.000) | 0.000 (0.000-0.000) | 0.000 (0.000-0.001) | 0.003 (0.000-0.008) |
| Timor-Leste                      | 0.000 (0.000-0.000) | 0.000 (0.000-0.000) | 0.000 (0.000-0.000) | 0.000 (0.000-0.000) | 0.000 (0.000-0.001) |
| Togo                             | 0.000 (0.000-0.000) | 0.000 (0.000-0.000) | 0.000 (0.000-0.001) | 0.001 (0.000-0.002) | 0.003 (0.000-0.009) |
| Tokelau                          | 0.004 (0.000-0.023) | 0.009 (0.001-0.032) | 0.020 (0.004-0.052) | 0.041 (0.013-0.087) | 0.074 (0.020-0.162) |
| Tonga                            | 0.005 (0.000-0.023) | 0.011 (0.002-0.033) | 0.022 (0.006-0.053) | 0.040 (0.016-0.077) | 0.061 (0.021-0.123) |
| Trinidad and Tobago              | 0.000 (0.000-0.001) | 0.000 (0.000-0.001) | 0.001 (0.000-0.003) | 0.006 (0.001-0.018) | 0.030 (0.004-0.092) |
| Tunisia                          | 0.000 (0.000-0.002) | 0.001 (0.000-0.002) | 0.001 (0.000-0.003) | 0.002 (0.001-0.006) | 0.006 (0.001-0.015) |
| Turkey                           | 0.000 (0.000-0.002) | 0.001 (0.000-0.002) | 0.002 (0.001-0.003) | 0.004 (0.002-0.006) | 0.008 (0.003-0.017) |
| Turkmenistan                     | 0.001 (0.000-0.006) | 0.001 (0.000-0.005) | 0.002 (0.000-0.006) | 0.003 (0.001-0.008) | 0.007 (0.001-0.021) |
| Tuvalu                           | 0.004 (0.000-0.018) | 0.009 (0.001-0.027) | 0.021 (0.005-0.052) | 0.034 (0.010-0.075) | 0.048 (0.012-0.112) |
| Uganda                           | 0.000 (0.000-0.000) | 0.000 (0.000-0.000) | 0.000 (0.000-0.000) | 0.000 (0.000-0.000) | 0.001 (0.000-0.002) |
| Ukraine                          | 0.001 (0.000-0.005) | 0.002 (0.000-0.006) | 0.003 (0.000-0.009) | 0.004 (0.001-0.011) | 0.007 (0.001-0.023) |
| United Arab Emirates             | 0.004 (0.000-0.021) | 0.004 (0.000-0.013) | 0.006 (0.001-0.015) | 0.013 (0.004-0.029) | 0.020 (0.005-0.049) |
| United Kingdom                   | 0.001 (0.000-0.002) | 0.001 (0.000-0.002) | 0.003 (0.002-0.005) | 0.009 (0.006-0.012) | 0.017 (0.009-0.030) |
| United States of America         | 0.003 (0.001-0.007) | 0.006 (0.003-0.010) | 0.014 (0.008-0.023) | 0.032 (0.020-0.047) | 0.052 (0.026-0.088) |
| Uruguay                          | 0.001 (0.000-0.005) | 0.001 (0.000-0.005) | 0.003 (0.000-0.008) | 0.005 (0.001-0.014) | 0.012 (0.002-0.032) |
| Uzbekistan                       | 0.001 (0.000-0.006) | 0.001 (0.000-0.005) | 0.001 (0.000-0.005) | 0.002 (0.000-0.007) | 0.005 (0.001-0.019) |
| Vanuatu                          | 0.002 (0.000-0.011) | 0.002 (0.000-0.010) | 0.004 (0.001-0.013) | 0.007 (0.002-0.019) | 0.014 (0.003-0.040) |
| Venezuela                        | 0.001 (0.000-0.004) | 0.001 (0.000-0.005) | 0.003 (0.001-0.009) | 0.007 (0.002-0.016) | 0.015 (0.004-0.038) |
| Viet Nam                         | 0.000 (0.000-0.000) | 0.000 (0.000-0.000) | 0.000 (0.000-0.000) | 0.000 (0.000-0.000) | 0.000 (0.000-0.001) |
| Yemen                            | 0.000 (0.000-0.001) | 0.000 (0.000-0.001) | 0.000 (0.000-0.002) | 0.001 (0.000-0.004) | 0.003 (0.000-0.009) |
| Zambia                           | 0.000 (0.000-0.000) | 0.000 (0.000-0.000) | 0.000 (0.000-0.001) | 0.000 (0.000-0.001) | 0.001 (0.000-0.005) |
| Zimbabwe                         | 0.000 (0.000-0.000) | 0.000 (0.000-0.000) | 0.000 (0.000-0.001) | 0.001 (0.000-0.003) | 0.002 (0.000-0.008) |

## Women, BMI $\geq 40$ kg/m<sup>2</sup>

| Country                  | Year                |                     |                     |                     |                     |
|--------------------------|---------------------|---------------------|---------------------|---------------------|---------------------|
|                          | 1975                | 1985                | 1995                | 2005                | 2014                |
| Afghanistan              | 0.000 (0.000-0.000) | 0.000 (0.000-0.000) | 0.000 (0.000-0.001) | 0.001 (0.000-0.002) | 0.002 (0.000-0.006) |
| Albania                  | 0.002 (0.000-0.009) | 0.003 (0.000-0.010) | 0.004 (0.001-0.011) | 0.007 (0.002-0.018) | 0.011 (0.002-0.028) |
| Algeria                  | 0.003 (0.000-0.012) | 0.006 (0.001-0.017) | 0.011 (0.004-0.024) | 0.019 (0.007-0.038) | 0.029 (0.010-0.061) |
| American Samoa           | 0.065 (0.024-0.130) | 0.089 (0.046-0.148) | 0.117 (0.068-0.180) | 0.138 (0.081-0.207) | 0.154 (0.078-0.248) |
| Andorra                  | 0.009 (0.001-0.031) | 0.013 (0.003-0.035) | 0.017 (0.004-0.040) | 0.024 (0.007-0.055) | 0.030 (0.007-0.072) |
| Angola                   | 0.000 (0.000-0.002) | 0.001 (0.000-0.003) | 0.001 (0.000-0.005) | 0.004 (0.001-0.012) | 0.009 (0.001-0.030) |
| Antigua and Barbuda      | 0.008 (0.001-0.031) | 0.016 (0.003-0.044) | 0.031 (0.009-0.071) | 0.047 (0.015-0.100) | 0.066 (0.018-0.146) |
| Argentina                | 0.006 (0.001-0.020) | 0.009 (0.003-0.022) | 0.015 (0.006-0.029) | 0.023 (0.011-0.040) | 0.034 (0.014-0.066) |
| Armenia                  | 0.003 (0.000-0.015) | 0.005 (0.001-0.017) | 0.007 (0.002-0.019) | 0.013 (0.004-0.029) | 0.021 (0.005-0.051) |
| Australia                | 0.005 (0.001-0.010) | 0.009 (0.005-0.015) | 0.016 (0.010-0.025) | 0.029 (0.019-0.043) | 0.043 (0.024-0.071) |
| Austria                  | 0.002 (0.000-0.005) | 0.003 (0.001-0.008) | 0.006 (0.002-0.013) | 0.011 (0.004-0.023) | 0.017 (0.005-0.038) |
| Azerbaijan               | 0.005 (0.000-0.021) | 0.008 (0.001-0.023) | 0.010 (0.003-0.024) | 0.015 (0.005-0.033) | 0.029 (0.008-0.066) |
| Bahamas                  | 0.018 (0.002-0.057) | 0.029 (0.007-0.071) | 0.041 (0.013-0.089) | 0.055 (0.020-0.111) | 0.066 (0.021-0.138) |
| Bahrain                  | 0.015 (0.002-0.048) | 0.016 (0.004-0.037) | 0.022 (0.008-0.044) | 0.029 (0.012-0.056) | 0.038 (0.013-0.077) |
| Bangladesh               | 0.000 (0.000-0.000) | 0.000 (0.000-0.000) | 0.000 (0.000-0.000) | 0.001 (0.000-0.001) | 0.002 (0.000-0.005) |
| Barbados                 | 0.007 (0.001-0.024) | 0.014 (0.004-0.032) | 0.024 (0.010-0.045) | 0.041 (0.018-0.075) | 0.059 (0.021-0.119) |
| Belarus                  | 0.005 (0.000-0.021) | 0.009 (0.002-0.027) | 0.013 (0.003-0.036) | 0.018 (0.005-0.044) | 0.025 (0.006-0.063) |
| Belgium                  | 0.003 (0.001-0.009) | 0.005 (0.002-0.010) | 0.009 (0.004-0.014) | 0.014 (0.007-0.024) | 0.019 (0.007-0.039) |
| Belize                   | 0.005 (0.000-0.019) | 0.010 (0.002-0.027) | 0.020 (0.006-0.044) | 0.035 (0.013-0.070) | 0.050 (0.017-0.105) |
| Benin                    | 0.000 (0.000-0.002) | 0.001 (0.000-0.003) | 0.003 (0.001-0.008) | 0.009 (0.003-0.017) | 0.018 (0.007-0.038) |
| Bermuda                  | 0.034 (0.004-0.099) | 0.042 (0.009-0.102) | 0.050 (0.014-0.108) | 0.062 (0.022-0.123) | 0.075 (0.024-0.152) |
| Bhutan                   | 0.000 (0.000-0.000) | 0.000 (0.000-0.000) | 0.000 (0.000-0.001) | 0.001 (0.000-0.003) | 0.003 (0.001-0.009) |
| Bolivia                  | 0.001 (0.000-0.006) | 0.002 (0.000-0.008) | 0.005 (0.001-0.013) | 0.010 (0.003-0.022) | 0.018 (0.005-0.043) |
| Bosnia and Herzegovina   | 0.001 (0.000-0.003) | 0.001 (0.000-0.004) | 0.002 (0.000-0.007) | 0.007 (0.002-0.017) | 0.010 (0.003-0.023) |
| Botswana                 | 0.002 (0.000-0.007) | 0.006 (0.001-0.019) | 0.017 (0.004-0.042) | 0.030 (0.010-0.063) | 0.045 (0.014-0.097) |
| Brazil                   | 0.002 (0.000-0.005) | 0.004 (0.001-0.009) | 0.008 (0.004-0.013) | 0.014 (0.008-0.021) | 0.022 (0.010-0.039) |
| Brunei Darussalam        | 0.003 (0.000-0.015) | 0.004 (0.000-0.016) | 0.006 (0.001-0.020) | 0.011 (0.002-0.031) | 0.018 (0.003-0.051) |
| Bulgaria                 | 0.004 (0.000-0.014) | 0.006 (0.001-0.018) | 0.009 (0.002-0.021) | 0.012 (0.004-0.028) | 0.016 (0.004-0.041) |
| Burkina Faso             | 0.000 (0.000-0.000) | 0.000 (0.000-0.001) | 0.001 (0.000-0.003) | 0.004 (0.001-0.008) | 0.009 (0.003-0.020) |
| Burundi                  | 0.000 (0.000-0.000) | 0.000 (0.000-0.001) | 0.000 (0.000-0.002) | 0.001 (0.000-0.004) | 0.004 (0.001-0.011) |
| Cabo Verde               | 0.000 (0.000-0.001) | 0.001 (0.000-0.003) | 0.003 (0.001-0.009) | 0.011 (0.003-0.025) | 0.021 (0.006-0.049) |
| Cambodia                 | 0.000 (0.000-0.000) | 0.000 (0.000-0.000) | 0.000 (0.000-0.000) | 0.000 (0.000-0.001) | 0.002 (0.000-0.005) |
| Cameroon                 | 0.000 (0.000-0.002) | 0.002 (0.000-0.005) | 0.004 (0.001-0.008) | 0.009 (0.004-0.018) | 0.020 (0.008-0.040) |
| Canada                   | 0.004 (0.001-0.011) | 0.010 (0.004-0.018) | 0.019 (0.010-0.032) | 0.033 (0.019-0.052) | 0.047 (0.022-0.080) |
| Central African Republic | 0.000 (0.000-0.000) | 0.000 (0.000-0.001) | 0.001 (0.000-0.002) | 0.001 (0.000-0.005) | 0.004 (0.001-0.013) |
| Chad                     | 0.000 (0.000-0.001) | 0.000 (0.000-0.001) | 0.001 (0.000-0.004) | 0.004 (0.001-0.010) | 0.011 (0.003-0.027) |
| Chile                    | 0.005 (0.001-0.019) | 0.010 (0.003-0.024) | 0.018 (0.008-0.034) | 0.029 (0.015-0.049) | 0.041 (0.018-0.074) |
| China                    | 0.000 (0.000-0.000) | 0.000 (0.000-0.000) | 0.000 (0.000-0.000) | 0.001 (0.000-0.001) | 0.002 (0.001-0.005) |
| China (Hong Kong SAR)    | 0.000 (0.000-0.002) | 0.001 (0.000-0.002) | 0.001 (0.000-0.004) | 0.002 (0.000-0.005) | 0.003 (0.000-0.010) |
| Colombia                 | 0.001 (0.000-0.005) | 0.003 (0.001-0.008) | 0.006 (0.002-0.012) | 0.010 (0.005-0.019) | 0.017 (0.006-0.033) |
| Comoros                  | 0.000 (0.000-0.002) | 0.001 (0.000-0.003) | 0.002 (0.000-0.005) | 0.004 (0.001-0.009) | 0.009 (0.002-0.021) |
| Congo                    | 0.000 (0.000-0.001) | 0.001 (0.000-0.003) | 0.002 (0.000-0.005) | 0.004 (0.001-0.010) | 0.009 (0.002-0.024) |
| Cook Islands             | 0.029 (0.005-0.077) | 0.058 (0.020-0.114) | 0.091 (0.040-0.156) | 0.117 (0.057-0.188) | 0.135 (0.063-0.223) |
| Costa Rica               | 0.002 (0.000-0.010) | 0.005 (0.001-0.015) | 0.011 (0.004-0.025) | 0.021 (0.009-0.042) | 0.034 (0.013-0.067) |
| Cote d'Ivoire            | 0.001 (0.000-0.004) | 0.002 (0.000-0.005) | 0.004 (0.001-0.009) | 0.008 (0.003-0.017) | 0.015 (0.005-0.033) |
| Croatia                  | 0.003 (0.000-0.012) | 0.005 (0.001-0.015) | 0.008 (0.002-0.020) | 0.012 (0.003-0.028) | 0.015 (0.003-0.040) |
| Cuba                     | 0.006 (0.001-0.020) | 0.013 (0.004-0.031) | 0.020 (0.007-0.039) | 0.029 (0.013-0.053) | 0.042 (0.017-0.081) |
| Cyprus                   | 0.001 (0.000-0.005) | 0.005 (0.001-0.014) | 0.011 (0.003-0.027) | 0.018 (0.005-0.042) | 0.026 (0.006-0.062) |
| Czech Republic           | 0.009 (0.002-0.026) | 0.013 (0.004-0.026) | 0.015 (0.006-0.028) | 0.017 (0.007-0.033) | 0.020 (0.006-0.044) |
| Denmark                  | 0.002 (0.000-0.006) | 0.004 (0.001-0.009) | 0.007 (0.003-0.014) | 0.011 (0.004-0.021) | 0.015 (0.005-0.032) |
| Djibouti                 | 0.001 (0.000-0.005) | 0.002 (0.000-0.006) | 0.003 (0.000-0.011) | 0.006 (0.001-0.017) | 0.010 (0.002-0.032) |
| Dominica                 | 0.005 (0.000-0.017) | 0.009 (0.002-0.026) | 0.020 (0.006-0.045) | 0.033 (0.012-0.068) | 0.049 (0.016-0.100) |
| Dominican Republic       | 0.002 (0.000-0.008) | 0.006 (0.001-0.014) | 0.012 (0.005-0.024) | 0.025 (0.012-0.046) | 0.041 (0.015-0.080) |
| DR Congo                 | 0.000 (0.000-0.001) | 0.000 (0.000-0.001) | 0.001 (0.000-0.003) | 0.002 (0.000-0.005) | 0.006 (0.001-0.016) |
| Ecuador                  | 0.001 (0.000-0.005) | 0.003 (0.000-0.009) | 0.005 (0.001-0.015) | 0.010 (0.003-0.023) | 0.017 (0.005-0.039) |
| Egypt                    | 0.007 (0.001-0.021) | 0.015 (0.005-0.030) | 0.026 (0.014-0.044) | 0.044 (0.026-0.067) | 0.066 (0.035-0.107) |
| El Salvador              | 0.002 (0.000-0.007) | 0.003 (0.000-0.009) | 0.007 (0.002-0.016) | 0.014 (0.005-0.029) | 0.023 (0.007-0.050) |
| Equatorial Guinea        | 0.000 (0.000-0.001) | 0.000 (0.000-0.002) | 0.001 (0.000-0.004) | 0.010 (0.002-0.028) | 0.020 (0.003-0.059) |
| Eritrea                  | 0.000 (0.000-0.000) | 0.000 (0.000-0.000) | 0.000 (0.000-0.001) | 0.001 (0.000-0.003) | 0.003 (0.001-0.008) |
| Estonia                  | 0.009 (0.001-0.026) | 0.011 (0.004-0.025) | 0.013 (0.006-0.023) | 0.016 (0.009-0.026) | 0.018 (0.008-0.035) |
| Ethiopia                 | 0.000 (0.000-0.000) | 0.000 (0.000-0.000) | 0.000 (0.000-0.001) | 0.001 (0.000-0.002) | 0.003 (0.001-0.007) |
| Fiji                     | 0.009 (0.001-0.038) | 0.014 (0.003-0.042) | 0.022 (0.006-0.052) | 0.033 (0.013-0.065) | 0.044 (0.016-0.089) |
| Finland                  | 0.001 (0.000-0.004) | 0.003 (0.001-0.007) | 0.007 (0.004-0.013) | 0.013 (0.008-0.021) | 0.018 (0.008-0.032) |
| France                   | 0.003 (0.000-0.009) | 0.005 (0.002-0.011) | 0.008 (0.003-0.016) | 0.013 (0.006-0.023) | 0.019 (0.006-0.038) |
| French Polynesia         | 0.053 (0.010-0.132) | 0.074 (0.023-0.150) | 0.094 (0.039-0.172) | 0.111 (0.054-0.185) | 0.126 (0.058-0.211) |

|                                  |                     |                     |                     |                     |                     |
|----------------------------------|---------------------|---------------------|---------------------|---------------------|---------------------|
| Gabon                            | 0.001 (0.000-0.005) | 0.003 (0.000-0.009) | 0.005 (0.001-0.014) | 0.010 (0.003-0.023) | 0.015 (0.004-0.038) |
| Gambia                           | 0.000 (0.000-0.002) | 0.001 (0.000-0.003) | 0.003 (0.001-0.008) | 0.008 (0.003-0.018) | 0.018 (0.006-0.038) |
| Georgia                          | 0.005 (0.000-0.023) | 0.010 (0.002-0.032) | 0.011 (0.003-0.029) | 0.017 (0.005-0.038) | 0.027 (0.008-0.063) |
| Germany                          | 0.002 (0.000-0.005) | 0.004 (0.002-0.006) | 0.007 (0.004-0.011) | 0.013 (0.007-0.019) | 0.019 (0.008-0.036) |
| Ghana                            | 0.001 (0.000-0.004) | 0.002 (0.001-0.006) | 0.006 (0.002-0.012) | 0.015 (0.007-0.027) | 0.031 (0.013-0.060) |
| Greece                           | 0.004 (0.000-0.016) | 0.008 (0.002-0.021) | 0.012 (0.004-0.028) | 0.020 (0.007-0.043) | 0.026 (0.007-0.062) |
| Greenland                        | 0.003 (0.000-0.008) | 0.006 (0.001-0.014) | 0.009 (0.003-0.021) | 0.015 (0.005-0.032) | 0.020 (0.006-0.045) |
| Grenada                          | 0.003 (0.000-0.012) | 0.007 (0.001-0.021) | 0.017 (0.005-0.039) | 0.032 (0.011-0.066) | 0.051 (0.017-0.105) |
| Guatemala                        | 0.002 (0.000-0.007) | 0.003 (0.001-0.009) | 0.007 (0.002-0.014) | 0.013 (0.005-0.026) | 0.023 (0.007-0.049) |
| Guinea                           | 0.000 (0.000-0.001) | 0.001 (0.000-0.002) | 0.002 (0.000-0.004) | 0.004 (0.001-0.010) | 0.010 (0.003-0.023) |
| Guinea Bissau                    | 0.000 (0.000-0.001) | 0.001 (0.000-0.003) | 0.002 (0.000-0.007) | 0.006 (0.001-0.014) | 0.012 (0.003-0.030) |
| Guyana                           | 0.003 (0.000-0.014) | 0.007 (0.001-0.021) | 0.014 (0.004-0.035) | 0.029 (0.009-0.063) | 0.047 (0.015-0.100) |
| Haiti                            | 0.001 (0.000-0.003) | 0.001 (0.000-0.005) | 0.003 (0.001-0.009) | 0.008 (0.002-0.018) | 0.017 (0.004-0.042) |
| Honduras                         | 0.001 (0.000-0.004) | 0.002 (0.000-0.007) | 0.005 (0.001-0.013) | 0.012 (0.004-0.024) | 0.022 (0.007-0.047) |
| Hungary                          | 0.006 (0.001-0.018) | 0.008 (0.003-0.019) | 0.010 (0.004-0.021) | 0.012 (0.004-0.026) | 0.015 (0.004-0.037) |
| Iceland                          | 0.001 (0.000-0.004) | 0.003 (0.001-0.008) | 0.006 (0.002-0.012) | 0.009 (0.003-0.020) | 0.013 (0.003-0.031) |
| India                            | 0.000 (0.000-0.000) | 0.000 (0.000-0.000) | 0.000 (0.000-0.000) | 0.001 (0.000-0.001) | 0.002 (0.001-0.003) |
| Indonesia                        | 0.000 (0.000-0.000) | 0.000 (0.000-0.000) | 0.000 (0.000-0.001) | 0.001 (0.000-0.002) | 0.004 (0.001-0.009) |
| Iran                             | 0.003 (0.000-0.011) | 0.005 (0.001-0.010) | 0.007 (0.004-0.012) | 0.013 (0.009-0.019) | 0.022 (0.011-0.039) |
| Iraq                             | 0.004 (0.000-0.014) | 0.006 (0.001-0.018) | 0.008 (0.002-0.021) | 0.014 (0.004-0.033) | 0.024 (0.006-0.057) |
| Ireland                          | 0.001 (0.000-0.004) | 0.003 (0.001-0.008) | 0.009 (0.003-0.019) | 0.021 (0.009-0.039) | 0.035 (0.014-0.067) |
| Israel                           | 0.006 (0.001-0.019) | 0.009 (0.003-0.022) | 0.014 (0.005-0.029) | 0.020 (0.008-0.038) | 0.026 (0.008-0.056) |
| Italy                            | 0.002 (0.000-0.007) | 0.004 (0.002-0.008) | 0.007 (0.004-0.011) | 0.012 (0.006-0.018) | 0.017 (0.007-0.033) |
| Jamaica                          | 0.007 (0.001-0.023) | 0.012 (0.004-0.027) | 0.024 (0.011-0.042) | 0.040 (0.021-0.067) | 0.059 (0.025-0.108) |
| Japan                            | 0.000 (0.000-0.000) | 0.000 (0.000-0.000) | 0.000 (0.000-0.000) | 0.000 (0.000-0.000) | 0.000 (0.000-0.000) |
| Jordan                           | 0.006 (0.001-0.021) | 0.016 (0.006-0.033) | 0.026 (0.012-0.046) | 0.041 (0.024-0.065) | 0.061 (0.030-0.102) |
| Kazakhstan                       | 0.005 (0.000-0.022) | 0.009 (0.002-0.027) | 0.015 (0.004-0.035) | 0.022 (0.007-0.049) | 0.032 (0.008-0.076) |
| Kenya                            | 0.000 (0.000-0.001) | 0.001 (0.000-0.002) | 0.002 (0.000-0.004) | 0.005 (0.001-0.011) | 0.012 (0.003-0.029) |
| Kiribati                         | 0.014 (0.002-0.041) | 0.022 (0.007-0.051) | 0.038 (0.014-0.077) | 0.065 (0.027-0.117) | 0.089 (0.034-0.166) |
| Kuwait                           | 0.041 (0.008-0.109) | 0.035 (0.014-0.069) | 0.041 (0.021-0.069) | 0.052 (0.028-0.082) | 0.063 (0.030-0.110) |
| Kyrgyzstan                       | 0.001 (0.000-0.007) | 0.003 (0.000-0.009) | 0.005 (0.001-0.012) | 0.008 (0.003-0.019) | 0.015 (0.004-0.035) |
| Lao PDR                          | 0.000 (0.000-0.000) | 0.000 (0.000-0.000) | 0.000 (0.000-0.000) | 0.000 (0.000-0.001) | 0.001 (0.000-0.004) |
| Latvia                           | 0.009 (0.001-0.032) | 0.014 (0.003-0.037) | 0.016 (0.005-0.038) | 0.020 (0.007-0.044) | 0.025 (0.007-0.060) |
| Lebanon                          | 0.005 (0.001-0.018) | 0.009 (0.002-0.023) | 0.015 (0.005-0.032) | 0.024 (0.008-0.050) | 0.037 (0.013-0.076) |
| Lesotho                          | 0.002 (0.000-0.007) | 0.004 (0.001-0.013) | 0.011 (0.003-0.026) | 0.024 (0.009-0.048) | 0.043 (0.016-0.085) |
| Liberia                          | 0.001 (0.000-0.003) | 0.002 (0.000-0.006) | 0.002 (0.000-0.007) | 0.006 (0.002-0.015) | 0.016 (0.005-0.037) |
| Libya                            | 0.018 (0.002-0.060) | 0.023 (0.007-0.054) | 0.027 (0.010-0.054) | 0.035 (0.015-0.066) | 0.047 (0.018-0.092) |
| Lithuania                        | 0.009 (0.001-0.028) | 0.014 (0.005-0.032) | 0.018 (0.008-0.034) | 0.023 (0.010-0.043) | 0.030 (0.009-0.064) |
| Luxembourg                       | 0.002 (0.000-0.006) | 0.003 (0.001-0.009) | 0.006 (0.001-0.017) | 0.011 (0.003-0.026) | 0.015 (0.004-0.038) |
| Macedonia (TFYR)                 | 0.004 (0.000-0.016) | 0.006 (0.001-0.018) | 0.009 (0.002-0.022) | 0.011 (0.003-0.027) | 0.014 (0.003-0.036) |
| Madagascar                       | 0.000 (0.000-0.000) | 0.000 (0.000-0.001) | 0.000 (0.000-0.001) | 0.001 (0.000-0.003) | 0.004 (0.001-0.010) |
| Malawi                           | 0.000 (0.000-0.000) | 0.000 (0.000-0.001) | 0.001 (0.000-0.002) | 0.002 (0.001-0.006) | 0.007 (0.002-0.017) |
| Malaysia                         | 0.000 (0.000-0.000) | 0.000 (0.000-0.001) | 0.002 (0.001-0.004) | 0.006 (0.003-0.011) | 0.015 (0.005-0.030) |
| Maldives                         | 0.000 (0.000-0.000) | 0.000 (0.000-0.000) | 0.000 (0.000-0.001) | 0.002 (0.000-0.005) | 0.005 (0.001-0.015) |
| Mali                             | 0.000 (0.000-0.001) | 0.001 (0.000-0.002) | 0.002 (0.000-0.004) | 0.005 (0.002-0.011) | 0.012 (0.004-0.027) |
| Malta                            | 0.005 (0.000-0.020) | 0.011 (0.003-0.027) | 0.017 (0.005-0.039) | 0.027 (0.009-0.056) | 0.035 (0.009-0.081) |
| Marshall Islands                 | 0.025 (0.004-0.071) | 0.041 (0.012-0.090) | 0.068 (0.027-0.125) | 0.090 (0.041-0.156) | 0.111 (0.046-0.198) |
| Mauritania                       | 0.001 (0.000-0.003) | 0.002 (0.000-0.006) | 0.005 (0.001-0.013) | 0.011 (0.004-0.025) | 0.021 (0.006-0.048) |
| Mauritius                        | 0.001 (0.000-0.004) | 0.002 (0.001-0.006) | 0.006 (0.002-0.014) | 0.014 (0.005-0.028) | 0.026 (0.008-0.057) |
| Mexico                           | 0.005 (0.000-0.015) | 0.009 (0.003-0.020) | 0.016 (0.008-0.027) | 0.026 (0.016-0.039) | 0.038 (0.018-0.066) |
| Micronesia (Federated States of) | 0.021 (0.004-0.061) | 0.036 (0.012-0.076) | 0.057 (0.026-0.103) | 0.084 (0.048-0.133) | 0.112 (0.057-0.178) |
| Moldova                          | 0.004 (0.000-0.017) | 0.007 (0.001-0.022) | 0.009 (0.002-0.024) | 0.012 (0.004-0.029) | 0.019 (0.005-0.044) |
| Mongolia                         | 0.001 (0.000-0.006) | 0.002 (0.000-0.009) | 0.004 (0.001-0.011) | 0.007 (0.003-0.015) | 0.013 (0.004-0.029) |
| Montenegro                       | 0.004 (0.000-0.018) | 0.007 (0.001-0.022) | 0.009 (0.002-0.024) | 0.011 (0.003-0.029) | 0.014 (0.003-0.039) |
| Morocco                          | 0.002 (0.000-0.008) | 0.004 (0.001-0.012) | 0.009 (0.003-0.019) | 0.017 (0.006-0.034) | 0.029 (0.009-0.062) |
| Mozambique                       | 0.000 (0.000-0.000) | 0.000 (0.000-0.001) | 0.000 (0.000-0.001) | 0.002 (0.000-0.004) | 0.005 (0.001-0.012) |
| Myanmar                          | 0.000 (0.000-0.000) | 0.000 (0.000-0.000) | 0.000 (0.000-0.000) | 0.001 (0.000-0.002) | 0.003 (0.001-0.009) |
| Namibia                          | 0.004 (0.000-0.017) | 0.006 (0.001-0.018) | 0.011 (0.004-0.025) | 0.021 (0.009-0.039) | 0.034 (0.013-0.066) |
| Nauru                            | 0.109 (0.048-0.191) | 0.131 (0.078-0.192) | 0.139 (0.089-0.196) | 0.143 (0.085-0.210) | 0.158 (0.076-0.256) |
| Nepal                            | 0.000 (0.000-0.000) | 0.000 (0.000-0.000) | 0.000 (0.000-0.000) | 0.001 (0.000-0.001) | 0.001 (0.000-0.004) |
| Netherlands                      | 0.001 (0.000-0.004) | 0.002 (0.001-0.005) | 0.005 (0.002-0.010) | 0.009 (0.005-0.017) | 0.013 (0.005-0.026) |
| New Zealand                      | 0.005 (0.001-0.012) | 0.009 (0.004-0.018) | 0.018 (0.009-0.032) | 0.035 (0.021-0.054) | 0.052 (0.029-0.083) |
| Nicaragua                        | 0.003 (0.000-0.011) | 0.005 (0.001-0.013) | 0.008 (0.003-0.018) | 0.017 (0.007-0.033) | 0.028 (0.010-0.060) |
| Niger                            | 0.000 (0.000-0.001) | 0.000 (0.000-0.001) | 0.001 (0.000-0.003) | 0.003 (0.001-0.007) | 0.007 (0.002-0.017) |
| Nigeria                          | 0.001 (0.000-0.003) | 0.001 (0.000-0.004) | 0.004 (0.001-0.007) | 0.010 (0.005-0.017) | 0.022 (0.010-0.041) |
| Niue                             | 0.023 (0.003-0.071) | 0.047 (0.013-0.105) | 0.074 (0.029-0.141) | 0.101 (0.048-0.170) | 0.125 (0.058-0.210) |
| North Korea                      | 0.000 (0.000-0.000) | 0.000 (0.000-0.000) | 0.000 (0.000-0.001) | 0.000 (0.000-0.002) | 0.001 (0.000-0.005) |
| Norway                           | 0.002 (0.000-0.005) | 0.005 (0.002-0.010) | 0.009 (0.005-0.017) | 0.016 (0.008-0.028) | 0.022 (0.009-0.043) |

|                                  |                     |                     |                     |                     |                     |
|----------------------------------|---------------------|---------------------|---------------------|---------------------|---------------------|
| Occupied Palestinian Territory   | 0.006 (0.001-0.020) | 0.010 (0.003-0.024) | 0.017 (0.007-0.034) | 0.032 (0.015-0.058) | 0.050 (0.019-0.099) |
| Oman                             | 0.004 (0.000-0.016) | 0.010 (0.003-0.023) | 0.018 (0.008-0.034) | 0.028 (0.013-0.050) | 0.041 (0.017-0.082) |
| Pakistan                         | 0.000 (0.000-0.000) | 0.000 (0.000-0.001) | 0.001 (0.000-0.003) | 0.003 (0.001-0.006) | 0.006 (0.002-0.013) |
| Palau                            | 0.061 (0.013-0.148) | 0.068 (0.023-0.134) | 0.086 (0.036-0.153) | 0.104 (0.049-0.173) | 0.119 (0.053-0.203) |
| Panama                           | 0.003 (0.000-0.012) | 0.006 (0.001-0.017) | 0.011 (0.004-0.026) | 0.021 (0.009-0.042) | 0.035 (0.013-0.072) |
| Papua New Guinea                 | 0.002 (0.000-0.011) | 0.003 (0.000-0.013) | 0.007 (0.001-0.020) | 0.012 (0.003-0.030) | 0.020 (0.004-0.054) |
| Paraguay                         | 0.001 (0.000-0.004) | 0.003 (0.000-0.010) | 0.007 (0.001-0.020) | 0.013 (0.003-0.034) | 0.022 (0.005-0.058) |
| Peru                             | 0.001 (0.000-0.006) | 0.003 (0.001-0.007) | 0.004 (0.002-0.010) | 0.008 (0.004-0.014) | 0.015 (0.007-0.028) |
| Philippines                      | 0.000 (0.000-0.000) | 0.000 (0.000-0.000) | 0.000 (0.000-0.001) | 0.001 (0.000-0.003) | 0.004 (0.001-0.010) |
| Poland                           | 0.006 (0.001-0.019) | 0.009 (0.003-0.018) | 0.012 (0.006-0.021) | 0.016 (0.008-0.028) | 0.021 (0.008-0.041) |
| Portugal                         | 0.001 (0.000-0.004) | 0.002 (0.000-0.006) | 0.005 (0.002-0.011) | 0.009 (0.003-0.018) | 0.014 (0.004-0.031) |
| Puerto Rico                      | 0.013 (0.002-0.040) | 0.025 (0.007-0.059) | 0.043 (0.018-0.082) | 0.057 (0.028-0.098) | 0.068 (0.030-0.121) |
| Qatar                            | 0.019 (0.003-0.057) | 0.045 (0.014-0.095) | 0.046 (0.020-0.085) | 0.061 (0.030-0.104) | 0.074 (0.034-0.133) |
| Romania                          | 0.004 (0.000-0.015) | 0.007 (0.002-0.018) | 0.009 (0.003-0.021) | 0.012 (0.004-0.029) | 0.017 (0.004-0.041) |
| Russian Federation               | 0.011 (0.003-0.029) | 0.016 (0.009-0.027) | 0.020 (0.013-0.028) | 0.024 (0.014-0.036) | 0.029 (0.011-0.056) |
| Rwanda                           | 0.000 (0.000-0.000) | 0.000 (0.000-0.000) | 0.000 (0.000-0.001) | 0.001 (0.000-0.003) | 0.004 (0.001-0.010) |
| Saint Kitts and Nevis            | 0.006 (0.001-0.021) | 0.014 (0.003-0.038) | 0.027 (0.008-0.060) | 0.044 (0.016-0.088) | 0.063 (0.021-0.131) |
| Saint Lucia                      | 0.003 (0.000-0.012) | 0.007 (0.002-0.019) | 0.018 (0.006-0.037) | 0.032 (0.013-0.061) | 0.054 (0.018-0.111) |
| Saint Vincent and the Grenadines | 0.003 (0.000-0.012) | 0.007 (0.001-0.021) | 0.017 (0.004-0.040) | 0.031 (0.010-0.069) | 0.046 (0.014-0.104) |
| Samoa                            | 0.025 (0.005-0.067) | 0.041 (0.015-0.080) | 0.068 (0.034-0.116) | 0.104 (0.060-0.157) | 0.133 (0.072-0.206) |
| Sao Tome and Principe            | 0.001 (0.000-0.006) | 0.003 (0.000-0.008) | 0.007 (0.002-0.017) | 0.014 (0.005-0.030) | 0.025 (0.008-0.056) |
| Saudi Arabia                     | 0.018 (0.003-0.052) | 0.026 (0.011-0.049) | 0.033 (0.019-0.051) | 0.045 (0.027-0.068) | 0.062 (0.031-0.106) |
| Senegal                          | 0.001 (0.000-0.003) | 0.002 (0.000-0.005) | 0.004 (0.001-0.009) | 0.009 (0.003-0.019) | 0.018 (0.006-0.039) |
| Serbia                           | 0.004 (0.000-0.013) | 0.006 (0.002-0.014) | 0.008 (0.003-0.016) | 0.011 (0.005-0.020) | 0.015 (0.005-0.032) |
| Seychelles                       | 0.003 (0.000-0.012) | 0.008 (0.002-0.021) | 0.017 (0.006-0.034) | 0.029 (0.013-0.055) | 0.045 (0.017-0.090) |
| Sierra Leone                     | 0.001 (0.000-0.003) | 0.002 (0.000-0.005) | 0.003 (0.001-0.009) | 0.007 (0.002-0.017) | 0.017 (0.006-0.038) |
| Singapore                        | 0.000 (0.000-0.001) | 0.000 (0.000-0.001) | 0.001 (0.000-0.002) | 0.001 (0.000-0.002) | 0.001 (0.000-0.004) |
| Slovakia                         | 0.002 (0.000-0.008) | 0.004 (0.001-0.010) | 0.006 (0.002-0.014) | 0.009 (0.003-0.019) | 0.013 (0.004-0.030) |
| Slovenia                         | 0.003 (0.000-0.012) | 0.005 (0.001-0.015) | 0.008 (0.002-0.021) | 0.011 (0.003-0.027) | 0.014 (0.003-0.037) |
| Solomon Islands                  | 0.002 (0.000-0.008) | 0.003 (0.000-0.013) | 0.007 (0.001-0.020) | 0.012 (0.003-0.028) | 0.020 (0.005-0.049) |
| Somalia                          | 0.000 (0.000-0.001) | 0.000 (0.000-0.001) | 0.001 (0.000-0.003) | 0.002 (0.000-0.005) | 0.004 (0.001-0.014) |
| South Africa                     | 0.025 (0.005-0.072) | 0.036 (0.014-0.073) | 0.049 (0.028-0.078) | 0.068 (0.046-0.095) | 0.087 (0.053-0.129) |
| South Korea                      | 0.000 (0.000-0.000) | 0.000 (0.000-0.000) | 0.000 (0.000-0.000) | 0.000 (0.000-0.000) | 0.000 (0.000-0.001) |
| Spain                            | 0.003 (0.001-0.009) | 0.006 (0.002-0.011) | 0.010 (0.006-0.016) | 0.017 (0.010-0.027) | 0.025 (0.010-0.049) |
| Sri Lanka                        | 0.000 (0.000-0.000) | 0.000 (0.000-0.000) | 0.000 (0.000-0.001) | 0.002 (0.000-0.004) | 0.006 (0.001-0.017) |
| Sudan                            | 0.000 (0.000-0.001) | 0.000 (0.000-0.001) | 0.001 (0.000-0.003) | 0.003 (0.001-0.008) | 0.006 (0.001-0.018) |
| Suriname                         | 0.010 (0.001-0.035) | 0.019 (0.004-0.048) | 0.025 (0.006-0.058) | 0.036 (0.011-0.077) | 0.051 (0.016-0.109) |
| Swaziland                        | 0.003 (0.000-0.012) | 0.006 (0.001-0.021) | 0.016 (0.004-0.039) | 0.028 (0.009-0.062) | 0.045 (0.013-0.098) |
| Sweden                           | 0.002 (0.000-0.005) | 0.003 (0.001-0.006) | 0.006 (0.003-0.010) | 0.010 (0.006-0.017) | 0.015 (0.006-0.029) |
| Switzerland                      | 0.001 (0.000-0.005) | 0.003 (0.001-0.007) | 0.006 (0.002-0.013) | 0.010 (0.004-0.019) | 0.013 (0.004-0.028) |
| Syrian Arab Republic             | 0.003 (0.000-0.012) | 0.007 (0.001-0.019) | 0.012 (0.004-0.028) | 0.022 (0.007-0.045) | 0.035 (0.011-0.076) |
| Taiwan                           | 0.000 (0.000-0.000) | 0.000 (0.000-0.000) | 0.000 (0.000-0.001) | 0.001 (0.000-0.002) | 0.002 (0.000-0.006) |
| Tajikistan                       | 0.002 (0.000-0.009) | 0.003 (0.000-0.010) | 0.004 (0.001-0.010) | 0.006 (0.001-0.015) | 0.013 (0.003-0.034) |
| Tanzania                         | 0.000 (0.000-0.001) | 0.000 (0.000-0.001) | 0.001 (0.000-0.003) | 0.004 (0.001-0.007) | 0.009 (0.003-0.020) |
| Thailand                         | 0.000 (0.000-0.000) | 0.000 (0.000-0.000) | 0.001 (0.000-0.002) | 0.003 (0.001-0.006) | 0.008 (0.002-0.018) |
| Timor-Leste                      | 0.000 (0.000-0.000) | 0.000 (0.000-0.000) | 0.000 (0.000-0.000) | 0.000 (0.000-0.001) | 0.001 (0.000-0.004) |
| Togo                             | 0.000 (0.000-0.002) | 0.001 (0.000-0.003) | 0.003 (0.001-0.007) | 0.007 (0.002-0.015) | 0.015 (0.005-0.032) |
| Tokelau                          | 0.025 (0.002-0.090) | 0.039 (0.008-0.104) | 0.061 (0.020-0.126) | 0.088 (0.038-0.159) | 0.116 (0.045-0.210) |
| Tonga                            | 0.025 (0.004-0.073) | 0.041 (0.013-0.092) | 0.067 (0.029-0.125) | 0.096 (0.051-0.156) | 0.121 (0.060-0.196) |
| Trinidad and Tobago              | 0.008 (0.000-0.031) | 0.014 (0.003-0.040) | 0.022 (0.007-0.050) | 0.043 (0.015-0.088) | 0.067 (0.018-0.149) |
| Tunisia                          | 0.003 (0.000-0.010) | 0.006 (0.002-0.015) | 0.011 (0.004-0.023) | 0.021 (0.009-0.039) | 0.034 (0.013-0.067) |
| Turkey                           | 0.005 (0.001-0.015) | 0.009 (0.004-0.019) | 0.018 (0.011-0.029) | 0.031 (0.020-0.043) | 0.048 (0.027-0.075) |
| Turkmenistan                     | 0.002 (0.000-0.012) | 0.004 (0.001-0.013) | 0.007 (0.002-0.019) | 0.012 (0.004-0.027) | 0.021 (0.006-0.051) |
| Tuvalu                           | 0.015 (0.002-0.045) | 0.031 (0.009-0.072) | 0.063 (0.024-0.124) | 0.093 (0.041-0.166) | 0.118 (0.049-0.209) |
| Uganda                           | 0.000 (0.000-0.000) | 0.000 (0.000-0.000) | 0.000 (0.000-0.001) | 0.001 (0.000-0.003) | 0.004 (0.001-0.010) |
| Ukraine                          | 0.008 (0.001-0.030) | 0.012 (0.002-0.034) | 0.015 (0.004-0.036) | 0.017 (0.005-0.040) | 0.022 (0.005-0.056) |
| United Arab Emirates             | 0.038 (0.005-0.113) | 0.033 (0.010-0.074) | 0.035 (0.015-0.064) | 0.046 (0.022-0.080) | 0.054 (0.021-0.105) |
| United Kingdom                   | 0.003 (0.001-0.008) | 0.007 (0.004-0.012) | 0.014 (0.010-0.020) | 0.028 (0.020-0.036) | 0.042 (0.026-0.061) |
| United States of America         | 0.013 (0.005-0.027) | 0.024 (0.014-0.037) | 0.042 (0.028-0.059) | 0.063 (0.045-0.085) | 0.081 (0.049-0.121) |
| Uruguay                          | 0.007 (0.001-0.027) | 0.012 (0.003-0.033) | 0.021 (0.007-0.045) | 0.030 (0.012-0.059) | 0.044 (0.016-0.089) |
| Uzbekistan                       | 0.002 (0.000-0.008) | 0.003 (0.000-0.010) | 0.005 (0.001-0.015) | 0.010 (0.003-0.024) | 0.019 (0.004-0.049) |
| Vanuatu                          | 0.004 (0.000-0.019) | 0.007 (0.001-0.023) | 0.014 (0.004-0.033) | 0.024 (0.009-0.049) | 0.038 (0.012-0.080) |
| Venezuela                        | 0.004 (0.000-0.016) | 0.006 (0.001-0.018) | 0.010 (0.003-0.023) | 0.016 (0.006-0.030) | 0.022 (0.008-0.046) |
| Viet Nam                         | 0.000 (0.000-0.000) | 0.000 (0.000-0.000) | 0.000 (0.000-0.000) | 0.000 (0.000-0.000) | 0.000 (0.000-0.001) |
| Yemen                            | 0.001 (0.000-0.004) | 0.002 (0.000-0.005) | 0.003 (0.001-0.008) | 0.007 (0.002-0.017) | 0.014 (0.004-0.033) |
| Zambia                           | 0.001 (0.000-0.002) | 0.001 (0.000-0.003) | 0.002 (0.001-0.005) | 0.005 (0.002-0.010) | 0.011 (0.003-0.024) |
| Zimbabwe                         | 0.003 (0.000-0.012) | 0.006 (0.002-0.016) | 0.013 (0.005-0.025) | 0.022 (0.009-0.040) | 0.032 (0.011-0.066) |

**Appendix Table 6:** Results of model validation. Test 1 and Test 2 are described in Appendix 3.

### Test 1: Men, mean BMI

| Data                     | No. of held out observations               | Percent covered                                              | Error (kg/m <sup>2</sup> ) <sup>†</sup> |       |       |      | Absolute error |      |      |      |      |
|--------------------------|--------------------------------------------|--------------------------------------------------------------|-----------------------------------------|-------|-------|------|----------------|------|------|------|------|
|                          |                                            |                                                              | Median                                  | Q1    | Q3    | (p*) | Median         | Q1   | Q3   | (p*) |      |
| All                      | 4099                                       | 98                                                           | 0.00                                    | -0.36 | 0.32  | 0.30 | 0.34           | 0.15 | 0.66 | 0.30 |      |
| Super-region             | Central and Eastern Europe                 | 328                                                          | 99                                      | 0.04  | -0.42 | 0.41 | 0.38           | 0.41 | 0.20 | 0.69 | 0.38 |
|                          | Central Asia, Middle East and North Africa | 310                                                          | 98                                      | 0.00  | -0.31 | 0.32 | 0.87           | 0.31 | 0.13 | 0.67 | 0.87 |
|                          | East and South East Asia                   | 569                                                          | 99                                      | 0.00  | -0.25 | 0.22 | 0.72           | 0.24 | 0.10 | 0.44 | 0.72 |
|                          | High-income Asia Pacific                   | <i>No data from this region were among the held-out data</i> |                                         |       |       |      |                |      |      |      |      |
|                          | High-income Western countries              | 1822                                                         | 99                                      | 0.02  | -0.39 | 0.34 | 0.10           | 0.36 | 0.16 | 0.67 | 0.10 |
|                          | Latin America and Caribbean                | 379                                                          | 98                                      | -0.05 | -0.46 | 0.27 | 0.58           | 0.35 | 0.17 | 0.75 | 0.58 |
|                          | Oceania                                    | 163                                                          | 82                                      | 0.01  | -0.73 | 0.72 | 0.89           | 0.73 | 0.29 | 1.78 | 0.89 |
|                          | South Asia                                 | 330                                                          | 100                                     | -0.03 | -0.33 | 0.26 | 0.89           | 0.30 | 0.13 | 0.62 | 0.89 |
| Sub-Saharan Africa       | 198                                        | 100                                                          | 0.01                                    | -0.35 | 0.32  | 0.91 | 0.33           | 0.15 | 0.55 | 0.91 |      |
| Urban or rural studies   | Rural                                      | 469                                                          | 98                                      | 0.00  | -0.43 | 0.33 | 0.63           | 0.37 | 0.16 | 0.71 | 0.63 |
|                          | Urban                                      | 1263                                                         | 98                                      | -0.01 | -0.41 | 0.37 | 0.32           | 0.40 | 0.18 | 0.73 | 0.32 |
|                          | Both rural and urban                       | 2367                                                         | 98                                      | 0.01  | -0.32 | 0.30 | 0.63           | 0.31 | 0.14 | 0.60 | 0.63 |
| Study representativeness | Community                                  | 1698                                                         | 98                                      | -0.02 | -0.45 | 0.36 | 0.23           | 0.41 | 0.18 | 0.76 | 0.23 |
|                          | Sub-national                               | 626                                                          | 99                                      | 0.01  | -0.34 | 0.33 | 0.94           | 0.33 | 0.16 | 0.67 | 0.94 |
|                          | National                                   | 1775                                                         | 98                                      | 0.01  | -0.31 | 0.28 | 0.74           | 0.29 | 0.13 | 0.55 | 0.74 |
| Age band                 | 18-40                                      | 1549                                                         | 98                                      | 0.12  | -0.20 | 0.49 | 0.15           | 0.36 | 0.15 | 0.68 | 0.15 |
|                          | 40-60                                      | 1300                                                         | 98                                      | 0.02  | -0.26 | 0.26 | 0.66           | 0.26 | 0.12 | 0.48 | 0.66 |
|                          | 60 and above                               | 1250                                                         | 98                                      | -0.25 | -0.68 | 0.14 | 0.00           | 0.44 | 0.21 | 0.81 | 0.00 |
| Years                    | 1975-1984                                  | 233                                                          | 96                                      | -0.05 | -0.37 | 0.34 | 0.79           | 0.35 | 0.18 | 0.66 | 0.79 |
|                          | 1985-1994                                  | 1057                                                         | 98                                      | 0.01  | -0.34 | 0.32 | 0.52           | 0.33 | 0.13 | 0.66 | 0.52 |
|                          | 1995-2004                                  | 1423                                                         | 99                                      | 0.01  | -0.38 | 0.34 | 0.57           | 0.35 | 0.15 | 0.65 | 0.57 |
|                          | 2005-2014                                  | 1386                                                         | 98                                      | 0.00  | -0.37 | 0.31 | 0.49           | 0.33 | 0.15 | 0.67 | 0.49 |
| Data density             | Data poor                                  | 159                                                          | 98                                      | -0.07 | -0.46 | 0.32 | 0.87           | 0.38 | 0.17 | 0.73 | 0.87 |
|                          | Average data density                       | 431                                                          | 99                                      | -0.01 | -0.34 | 0.32 | 0.95           | 0.33 | 0.15 | 0.61 | 0.95 |
|                          | Data rich                                  | 3509                                                         | 98                                      | 0.01  | -0.36 | 0.32 | 0.28           | 0.34 | 0.15 | 0.66 | 0.28 |

<sup>†</sup> Estimated values minus held out values.

\* p-values for model error comparisons were calculated using the non-parametric Wilcoxon signed-rank test for paired data. The p-values are calculated assuming independence of the held-out observations. They should therefore be interpreted as an approximation because there is some dependence among the held-out observations, within each of the five repetitions for example.

**Test 1: Men, BMI < 18.5 kg/m<sup>2</sup>**

| Data                     | No. of held out observations               | Percent covered                                              | Error (percentage points) <sup>†</sup> |        |        |       | Absolute error |       |      |       |      |
|--------------------------|--------------------------------------------|--------------------------------------------------------------|----------------------------------------|--------|--------|-------|----------------|-------|------|-------|------|
|                          |                                            |                                                              | Median                                 | Q1     | Q3     | (p*)  | Median         | Q1    | Q3   | (p*)  |      |
| All                      | 4099                                       | 78                                                           | -0.10                                  | -1.72  | 0.62   | 0.02  | 1.08           | 0.34  | 3.79 | 0.02  |      |
| Super-region             | Central and Eastern Europe                 | 328                                                          | 78                                     | -0.60  | -1.36  | 0.23  | 0.00           | 0.79  | 0.35 | 1.64  | 0.00 |
|                          | Central Asia, Middle East and North Africa | 310                                                          | 90                                     | -1.30  | -3.49  | 0.69  | 0.00           | 2.21  | 0.97 | 3.97  | 0.00 |
|                          | East and South East Asia                   | 569                                                          | 97                                     | 1.88   | -3.58  | 4.83  | 0.00           | 4.35  | 2.56 | 7.19  | 0.00 |
|                          | High-income Asia Pacific                   | <i>No data from this region were among the held-out data</i> |                                        |        |        |       |                |       |      |       |      |
|                          | High-income Western countries              | 1822                                                         | 66                                     | 0.02   | -0.55  | 0.38  | 0.00           | 0.44  | 0.20 | 0.97  | 0.00 |
|                          | Latin America and Caribbean                | 379                                                          | 80                                     | -0.85  | -3.07  | 0.43  | 0.00           | 1.40  | 0.57 | 3.24  | 0.00 |
|                          | Oceania                                    | 163                                                          | 37                                     | 0.19   | -0.37  | 0.74  | 0.00           | 0.70  | 0.24 | 2.17  | 0.00 |
|                          | South Asia                                 | 330                                                          | 97                                     | -10.24 | -20.77 | -1.37 | 0.00           | 10.34 | 4.77 | 20.84 | 0.00 |
| Sub-Saharan Africa       | 198                                        | 97                                                           | 2.66                                   | -3.88  | 6.31   | 0.00  | 6.09           | 3.06  | 9.21 | 0.00  |      |
| Urban or rural studies   | Rural                                      | 469                                                          | 67                                     | -0.02  | -10.05 | 0.78  | 0.06           | 1.79  | 0.59 | 10.93 | 0.06 |
|                          | Urban                                      | 1263                                                         | 70                                     | -0.11  | -1.25  | 0.45  | 0.28           | 0.78  | 0.32 | 2.59  | 0.28 |
|                          | Both rural and urban                       | 2367                                                         | 83                                     | -0.09  | -1.71  | 0.77  | 0.32           | 1.18  | 0.32 | 3.98  | 0.32 |
| Study representativeness | Community                                  | 1698                                                         | 70                                     | -0.03  | -1.53  | 0.62  | 0.00           | 1.00  | 0.37 | 3.77  | 0.00 |
|                          | Sub-national                               | 626                                                          | 76                                     | -0.12  | -1.37  | 0.32  | 0.91           | 0.69  | 0.24 | 2.79  | 0.91 |
|                          | National                                   | 1775                                                         | 85                                     | -0.12  | -2.00  | 0.84  | 0.75           | 1.33  | 0.39 | 4.12  | 0.75 |
| Age band                 | 18-40                                      | 1549                                                         | 80                                     | -0.21  | -2.47  | 1.04  | 0.41           | 1.69  | 0.60 | 4.44  | 0.41 |
|                          | 40-60                                      | 1300                                                         | 75                                     | -0.05  | -0.95  | 0.36  | 0.52           | 0.62  | 0.23 | 2.98  | 0.52 |
|                          | 60 and above                               | 1250                                                         | 77                                     | -0.05  | -1.73  | 0.62  | 0.27           | 0.99  | 0.34 | 3.73  | 0.27 |
| Years                    | 1975-1984                                  | 233                                                          | 62                                     | 0.27   | -0.55  | 0.65  | 0.00           | 0.62  | 0.32 | 1.56  | 0.00 |
|                          | 1985-1994                                  | 1057                                                         | 69                                     | 0.13   | -0.98  | 0.69  | 0.00           | 0.81  | 0.33 | 2.67  | 0.00 |
|                          | 1995-2004                                  | 1423                                                         | 85                                     | -0.21  | -1.93  | 0.52  | 0.48           | 1.16  | 0.34 | 4.01  | 0.48 |
|                          | 2005-2014                                  | 1386                                                         | 79                                     | -0.16  | -3.01  | 0.69  | 0.35           | 1.49  | 0.39 | 4.91  | 0.35 |
| Data density             | Data poor                                  | 159                                                          | 87                                     | -0.02  | -2.85  | 2.38  | 0.68           | 2.58  | 0.82 | 6.40  | 0.68 |
|                          | Average data density                       | 431                                                          | 82                                     | 0.13   | -2.01  | 1.85  | 0.25           | 1.92  | 0.62 | 4.91  | 0.25 |
|                          | Data rich                                  | 3509                                                         | 76                                     | -0.12  | -1.61  | 0.53  | 0.04           | 0.97  | 0.32 | 3.46  | 0.04 |

<sup>†</sup> Estimated values minus held out values.

\* p-values for model error comparisons were calculated using the non-parametric Wilcoxon signed-rank test for paired data. The p-values are calculated assuming independence of the held-out observations. They should therefore be interpreted as an approximation because there is some dependence among the held-out observations, within each of the five repetitions for example.



**Test 1: Men, BMI 18.5 to <20 kg/m<sup>2</sup>**

| Data                     |                                            | No. of held out observations                                 | Percent covered | Error (percentage points) <sup>†</sup> |       |      |      | Absolute error |      |      |      |
|--------------------------|--------------------------------------------|--------------------------------------------------------------|-----------------|----------------------------------------|-------|------|------|----------------|------|------|------|
|                          |                                            |                                                              |                 | Median                                 | Q1    | Q3   | (p*) | Median         | Q1   | Q3   | (p*) |
| All                      |                                            | 4099                                                         | 89              | -0.21                                  | -2.21 | 1.21 | 0.85 | 1.58           | 0.65 | 3.85 | 0.85 |
| Super-region             | Central and Eastern Europe                 | 328                                                          | 94              | -1.01                                  | -2.28 | 0.49 | 0.00 | 1.56           | 0.77 | 2.66 | 0.00 |
|                          | Central Asia, Middle East and North Africa | 310                                                          | 95              | -1.56                                  | -3.87 | 0.71 | 0.00 | 2.41           | 1.10 | 4.36 | 0.00 |
|                          | East and South East Asia                   | 569                                                          | 99              | 0.48                                   | -3.93 | 3.76 | 0.05 | 3.85           | 1.57 | 7.21 | 0.05 |
|                          | High-income Asia Pacific                   | <i>No data from this region were among the held-out data</i> |                 |                                        |       |      |      |                |      |      |      |
|                          | High-income Western countries              | 1822                                                         | 85              | -0.06                                  | -1.07 | 0.86 | 0.10 | 0.96           | 0.41 | 1.80 | 0.10 |
|                          | Latin America and Caribbean                | 379                                                          | 87              | -1.18                                  | -3.66 | 0.98 | 0.01 | 2.15           | 1.08 | 4.21 | 0.01 |
|                          | Oceania                                    | 163                                                          | 51              | 0.43                                   | -0.64 | 1.79 | 0.00 | 1.14           | 0.52 | 3.23 | 0.00 |
|                          | South Asia                                 | 330                                                          | 98              | -1.43                                  | -5.75 | 1.95 | 0.00 | 4.00           | 1.70 | 6.91 | 0.00 |
| Sub-Saharan Africa       | 198                                        | 100                                                          | 1.99            | -2.78                                  | 5.78  | 0.02 | 4.88 | 2.45           | 8.10 | 0.02 |      |
| Urban or rural studies   | Rural                                      | 469                                                          | 80              | -0.41                                  | -4.85 | 1.49 | 0.71 | 2.32           | 1.09 | 5.61 | 0.71 |
|                          | Urban                                      | 1263                                                         | 87              | -0.32                                  | -1.98 | 1.15 | 0.03 | 1.50           | 0.66 | 3.17 | 0.03 |
|                          | Both rural and urban                       | 2367                                                         | 92              | -0.13                                  | -2.07 | 1.17 | 0.55 | 1.52           | 0.60 | 3.86 | 0.55 |
| Study representativeness | Community                                  | 1698                                                         | 85              | -0.21                                  | -2.13 | 1.39 | 0.93 | 1.71           | 0.80 | 4.11 | 0.93 |
|                          | Sub-national                               | 626                                                          | 90              | -0.06                                  | -1.60 | 0.99 | 0.87 | 1.22           | 0.47 | 2.96 | 0.87 |
|                          | National                                   | 1775                                                         | 93              | -0.29                                  | -2.48 | 1.08 | 0.56 | 1.60           | 0.60 | 3.92 | 0.56 |
| Age band                 | 18-40                                      | 1549                                                         | 92              | -0.52                                  | -3.11 | 1.58 | 0.52 | 2.37           | 1.05 | 5.32 | 0.52 |
|                          | 40-60                                      | 1300                                                         | 89              | -0.13                                  | -1.66 | 1.00 | 0.21 | 1.26           | 0.52 | 2.88 | 0.21 |
|                          | 60 and above                               | 1250                                                         | 85              | -0.06                                  | -1.61 | 1.10 | 0.69 | 1.29           | 0.55 | 3.04 | 0.69 |
| Years                    | 1975-1984                                  | 233                                                          | 82              | 0.31                                   | -1.22 | 1.39 | 0.37 | 1.35           | 0.66 | 2.63 | 0.37 |
|                          | 1985-1994                                  | 1057                                                         | 87              | 0.04                                   | -1.63 | 1.41 | 0.75 | 1.49           | 0.67 | 3.35 | 0.75 |
|                          | 1995-2004                                  | 1423                                                         | 92              | -0.38                                  | -2.41 | 1.03 | 0.37 | 1.60           | 0.65 | 3.70 | 0.37 |
|                          | 2005-2014                                  | 1386                                                         | 89              | -0.29                                  | -2.78 | 1.07 | 0.64 | 1.78           | 0.64 | 4.51 | 0.64 |
| Data density             | Data poor                                  | 159                                                          | 92              | -0.01                                  | -2.65 | 2.21 | 0.96 | 2.61           | 1.10 | 5.44 | 0.96 |
|                          | Average data density                       | 431                                                          | 91              | 0.15                                   | -2.57 | 2.39 | 0.83 | 2.43           | 1.00 | 5.22 | 0.83 |
|                          | Data rich                                  | 3509                                                         | 89              | -0.25                                  | -2.11 | 1.09 | 0.83 | 1.48           | 0.61 | 3.55 | 0.83 |

<sup>†</sup> Estimated values minus held out values.

\* p-values for model error comparisons were calculated using the non-parametric Wilcoxon signed-rank test for paired data. The p-values are calculated assuming independence of the held-out observations. They should therefore be interpreted as an approximation because there is some dependence among the held-out observations, within each of the five repetitions for example.

**Test 1: Men, BMI 20 to <25 kg/m<sup>2</sup>**

| Data                     | No. of held out observations               | Percent covered                                              | Error (percentage points) <sup>†</sup> |       |       |       | Absolute error |       |       |       |      |
|--------------------------|--------------------------------------------|--------------------------------------------------------------|----------------------------------------|-------|-------|-------|----------------|-------|-------|-------|------|
|                          |                                            |                                                              | Median                                 | Q1    | Q3    | (p*)  | Median         | Q1    | Q3    | (p*)  |      |
| All                      | 4099                                       | 99                                                           | 1.95                                   | -3.76 | 8.52  | 0.00  | 6.33           | 2.75  | 11.41 | 0.00  |      |
| Super-region             | Central and Eastern Europe                 | 328                                                          | 100                                    | -3.46 | -9.74 | 3.21  | 0.01           | 6.68  | 3.39  | 11.67 | 0.01 |
|                          | Central Asia, Middle East and North Africa | 310                                                          | 100                                    | 0.06  | -7.48 | 9.16  | 0.70           | 8.10  | 4.06  | 12.59 | 0.70 |
|                          | East and South East Asia                   | 569                                                          | 100                                    | 2.02  | -2.71 | 8.04  | 0.00           | 5.05  | 2.49  | 9.18  | 0.00 |
|                          | High-income Asia Pacific                   | <i>No data from this region were among the held-out data</i> |                                        |       |       |       |                |       |       |       |      |
|                          | High-income Western countries              | 1822                                                         | 99                                     | 2.01  | -2.73 | 7.93  | 0.00           | 5.42  | 2.30  | 10.16 | 0.00 |
|                          | Latin America and Caribbean                | 379                                                          | 99                                     | 1.08  | -5.80 | 7.51  | 0.20           | 6.66  | 3.31  | 11.14 | 0.20 |
|                          | Oceania                                    | 163                                                          | 93                                     | 4.26  | -2.05 | 14.18 | 0.00           | 7.90  | 3.48  | 19.68 | 0.00 |
|                          | South Asia                                 | 330                                                          | 99                                     | 10.11 | 1.18  | 19.34 | 0.00           | 11.14 | 5.34  | 19.38 | 0.00 |
| Sub-Saharan Africa       | 198                                        | 99                                                           | 0.51                                   | -5.29 | 6.73  | 0.04  | 6.25           | 2.64  | 11.19 | 0.04  |      |
| Urban or rural studies   | Rural                                      | 469                                                          | 98                                     | 7.77  | -0.24 | 15.78 | 0.00           | 9.53  | 4.55  | 17.09 | 0.00 |
|                          | Urban                                      | 1263                                                         | 99                                     | 0.95  | -4.92 | 7.25  | 0.00           | 6.21  | 2.86  | 11.13 | 0.00 |
|                          | Both rural and urban                       | 2367                                                         | 99                                     | 1.66  | -3.56 | 7.81  | 0.00           | 5.87  | 2.59  | 10.78 | 0.00 |
| Study representativeness | Community                                  | 1698                                                         | 99                                     | 2.48  | -3.87 | 10.12 | 0.00           | 7.02  | 3.19  | 12.51 | 0.00 |
|                          | Sub-national                               | 626                                                          | 100                                    | 2.99  | -2.54 | 8.82  | 0.00           | 6.46  | 2.85  | 11.60 | 0.00 |
|                          | National                                   | 1775                                                         | 99                                     | 1.19  | -4.01 | 7.11  | 0.00           | 5.56  | 2.51  | 10.26 | 0.00 |
| Age band                 | 18-40                                      | 1549                                                         | 99                                     | 1.74  | -3.68 | 9.02  | 0.00           | 6.37  | 2.63  | 11.90 | 0.00 |
|                          | 40-60                                      | 1300                                                         | 100                                    | 1.29  | -4.17 | 7.70  | 0.00           | 6.04  | 2.50  | 10.96 | 0.00 |
|                          | 60 and above                               | 1250                                                         | 99                                     | 2.97  | -3.51 | 9.20  | 0.00           | 6.51  | 3.22  | 11.58 | 0.00 |
| Years                    | 1975-1984                                  | 233                                                          | 98                                     | 2.24  | -3.68 | 11.23 | 0.00           | 6.52  | 2.92  | 13.25 | 0.00 |
|                          | 1985-1994                                  | 1057                                                         | 99                                     | 0.61  | -5.36 | 7.87  | 0.00           | 6.50  | 3.07  | 11.29 | 0.00 |
|                          | 1995-2004                                  | 1423                                                         | 99                                     | 2.38  | -3.06 | 8.63  | 0.00           | 6.00  | 2.72  | 11.35 | 0.00 |
|                          | 2005-2014                                  | 1386                                                         | 99                                     | 2.28  | -3.05 | 8.75  | 0.00           | 6.42  | 2.64  | 11.32 | 0.00 |
| Data density             | Data poor                                  | 159                                                          | 99                                     | 1.30  | -6.76 | 8.55  | 0.36           | 7.60  | 3.56  | 12.14 | 0.36 |
|                          | Average data density                       | 431                                                          | 99                                     | 0.83  | -4.87 | 7.43  | 0.09           | 6.08  | 2.71  | 11.17 | 0.09 |
|                          | Data rich                                  | 3509                                                         | 99                                     | 2.07  | -3.52 | 8.72  | 0.00           | 6.30  | 2.74  | 11.46 | 0.00 |

<sup>†</sup> Estimated values minus held out values.

\* p-values for model error comparisons were calculated using the non-parametric Wilcoxon signed-rank test for paired data. The p-values are calculated assuming independence of the held-out observations. They should therefore be interpreted as an approximation because there is some dependence among the held-out observations, within each of the five repetitions for example.

**Test 1: Men, BMI 25 to <30 kg/m<sup>2</sup>**

| Data                     | No. of held out observations               | Percent covered                                              | Error (percentage points) <sup>†</sup> |       |       |      | Absolute error |      |      |       |      |
|--------------------------|--------------------------------------------|--------------------------------------------------------------|----------------------------------------|-------|-------|------|----------------|------|------|-------|------|
|                          |                                            |                                                              | Median                                 | Q1    | Q3    | (p*) | Median         | Q1   | Q3   | (p*)  |      |
| All                      | 4099                                       | 98                                                           | 0.70                                   | -3.84 | 5.48  | 0.21 | 4.66           | 2.14 | 8.45 | 0.21  |      |
| Super-region             | Central and Eastern Europe                 | 328                                                          | 99                                     | 4.15  | -1.16 | 7.58 | 0.00           | 5.88 | 3.12 | 8.22  | 0.00 |
|                          | Central Asia, Middle East and North Africa | 310                                                          | 98                                     | 2.51  | -2.27 | 7.38 | 0.00           | 4.99 | 2.47 | 9.09  | 0.00 |
|                          | East and South East Asia                   | 569                                                          | 98                                     | -0.86 | -6.05 | 3.12 | 0.01           | 4.91 | 1.92 | 8.71  | 0.01 |
|                          | High-income Asia Pacific                   | <i>No data from this region were among the held-out data</i> |                                        |       |       |      |                |      |      |       |      |
|                          | High-income Western countries              | 1822                                                         | 99                                     | -0.39 | -3.81 | 3.43 | 0.02           | 3.64 | 1.79 | 6.82  | 0.02 |
|                          | Latin America and Caribbean                | 379                                                          | 98                                     | 2.55  | -2.85 | 8.52 | 0.00           | 6.05 | 2.66 | 10.37 | 0.00 |
|                          | Oceania                                    | 163                                                          | 94                                     | 1.28  | -7.07 | 8.99 | 0.29           | 8.01 | 3.98 | 17.63 | 0.29 |
|                          | South Asia                                 | 330                                                          | 96                                     | 5.24  | 0.57  | 9.84 | 0.00           | 7.10 | 3.16 | 11.35 | 0.00 |
| Sub-Saharan Africa       | 198                                        | 96                                                           | -1.27                                  | -6.65 | 3.31  | 0.61 | 5.33           | 2.51 | 7.98 | 0.61  |      |
| Urban or rural studies   | Rural                                      | 469                                                          | 95                                     | 2.00  | -3.97 | 8.45 | 0.05           | 6.55 | 2.83 | 10.98 | 0.05 |
|                          | Urban                                      | 1263                                                         | 99                                     | 0.72  | -4.30 | 6.16 | 0.26           | 5.12 | 2.24 | 9.13  | 0.26 |
|                          | Both rural and urban                       | 2367                                                         | 99                                     | 0.54  | -3.69 | 4.67 | 0.66           | 4.16 | 1.97 | 7.60  | 0.66 |
| Study representativeness | Community                                  | 1698                                                         | 98                                     | 0.88  | -4.69 | 6.56 | 0.36           | 5.70 | 2.49 | 10.21 | 0.36 |
|                          | Sub-national                               | 626                                                          | 99                                     | 0.31  | -3.77 | 4.55 | 0.97           | 4.17 | 1.93 | 7.55  | 0.97 |
|                          | National                                   | 1775                                                         | 98                                     | 0.68  | -3.36 | 4.98 | 0.22           | 4.10 | 1.96 | 7.40  | 0.22 |
| Age band                 | 18-40                                      | 1549                                                         | 97                                     | 0.86  | -3.71 | 4.99 | 0.27           | 4.35 | 2.08 | 7.91  | 0.27 |
|                          | 40-60                                      | 1300                                                         | 100                                    | 0.66  | -3.68 | 5.88 | 0.53           | 4.66 | 2.04 | 8.59  | 0.53 |
|                          | 60 and above                               | 1250                                                         | 98                                     | 0.56  | -4.23 | 5.85 | 0.65           | 4.98 | 2.28 | 9.01  | 0.65 |
| Years                    | 1975-1984                                  | 233                                                          | 98                                     | -0.66 | -5.88 | 4.69 | 0.32           | 5.20 | 2.33 | 9.85  | 0.32 |
|                          | 1985-1994                                  | 1057                                                         | 98                                     | 0.60  | -4.46 | 5.22 | 0.79           | 4.85 | 2.05 | 8.73  | 0.79 |
|                          | 1995-2004                                  | 1423                                                         | 98                                     | 0.70  | -3.71 | 5.87 | 0.36           | 4.70 | 2.24 | 8.22  | 0.36 |
|                          | 2005-2014                                  | 1386                                                         | 98                                     | 0.95  | -3.15 | 5.33 | 0.08           | 4.36 | 2.03 | 8.17  | 0.08 |
| Data density             | Data poor                                  | 159                                                          | 98                                     | 1.32  | -3.85 | 6.47 | 0.30           | 5.17 | 2.20 | 10.70 | 0.30 |
|                          | Average data density                       | 431                                                          | 98                                     | -0.64 | -5.99 | 5.42 | 0.77           | 5.74 | 2.93 | 8.79  | 0.77 |
|                          | Data rich                                  | 3509                                                         | 98                                     | 0.74  | -3.62 | 5.47 | 0.31           | 4.48 | 2.07 | 8.26  | 0.31 |

<sup>†</sup> Estimated values minus held out values.

\* p-values for model error comparisons were calculated using the non-parametric Wilcoxon signed-rank test for paired data. The p-values are calculated assuming independence of the held-out observations. They should therefore be interpreted as an approximation because there is some dependence among the held-out observations, within each of the five repetitions for example.

**Test 1: Men, BMI 30 to <35 kg/m<sup>2</sup>**

| Data                     | No. of held out observations               | Percent covered                                              | Error (percentage points) <sup>†</sup> |       |       |      | Absolute error |      |      |       |      |
|--------------------------|--------------------------------------------|--------------------------------------------------------------|----------------------------------------|-------|-------|------|----------------|------|------|-------|------|
|                          |                                            |                                                              | Median                                 | Q1    | Q3    | (p*) | Median         | Q1   | Q3   | (p*)  |      |
| All                      | 4099                                       | 92                                                           | 0.07                                   | -2.66 | 2.17  | 0.64 | 2.40           | 0.90 | 5.05 | 0.64  |      |
| Super-region             | Central and Eastern Europe                 | 328                                                          | 91                                     | 2.51  | -0.89 | 5.18 | 0.00           | 3.87 | 2.10 | 6.30  | 0.00 |
|                          | Central Asia, Middle East and North Africa | 310                                                          | 96                                     | 1.50  | -2.36 | 4.63 | 0.03           | 4.01 | 1.85 | 7.55  | 0.03 |
|                          | East and South East Asia                   | 569                                                          | 85                                     | -0.27 | -1.48 | 0.38 | 0.00           | 0.83 | 0.33 | 1.76  | 0.00 |
|                          | High-income Asia Pacific                   | <i>No data from this region were among the held-out data</i> |                                        |       |       |      |                |      |      |       |      |
|                          | High-income Western countries              | 1822                                                         | 96                                     | -0.45 | -3.65 | 2.12 | 0.00           | 2.95 | 1.26 | 5.44  | 0.00 |
|                          | Latin America and Caribbean                | 379                                                          | 95                                     | 1.25  | -2.17 | 4.27 | 0.03           | 3.38 | 1.65 | 6.39  | 0.03 |
|                          | Oceania                                    | 163                                                          | 85                                     | -1.28 | -9.04 | 3.80 | 0.12           | 7.25 | 3.18 | 11.39 | 0.12 |
|                          | South Asia                                 | 330                                                          | 82                                     | 0.39  | -0.61 | 1.03 | 0.00           | 0.93 | 0.44 | 1.66  | 0.00 |
| Sub-Saharan Africa       | 198                                        | 84                                                           | -0.30                                  | -1.98 | 0.53  | 0.28 | 1.23           | 0.39 | 2.46 | 0.28  |      |
| Urban or rural studies   | Rural                                      | 469                                                          | 82                                     | -0.07 | -3.97 | 1.23 | 0.66           | 2.08 | 0.81 | 5.42  | 0.66 |
|                          | Urban                                      | 1263                                                         | 93                                     | 0.25  | -2.83 | 3.16 | 0.42           | 3.02 | 1.29 | 5.43  | 0.42 |
|                          | Both rural and urban                       | 2367                                                         | 93                                     | 0.06  | -2.29 | 1.91 | 0.69           | 2.12 | 0.77 | 4.81  | 0.69 |
| Study representativeness | Community                                  | 1698                                                         | 90                                     | -0.24 | -3.67 | 2.14 | 0.15           | 2.88 | 1.14 | 5.50  | 0.15 |
|                          | Sub-national                               | 626                                                          | 95                                     | -0.37 | -3.78 | 1.69 | 0.31           | 2.64 | 1.04 | 6.03  | 0.31 |
|                          | National                                   | 1775                                                         | 92                                     | 0.22  | -1.56 | 2.37 | 0.01           | 1.94 | 0.66 | 4.32  | 0.01 |
| Age band                 | 18-40                                      | 1549                                                         | 86                                     | 0.15  | -1.56 | 1.86 | 0.01           | 1.72 | 0.61 | 3.78  | 0.01 |
|                          | 40-60                                      | 1300                                                         | 98                                     | 0.08  | -3.13 | 2.64 | 0.76           | 2.88 | 1.18 | 6.06  | 0.76 |
|                          | 60 and above                               | 1250                                                         | 93                                     | -0.39 | -3.92 | 2.09 | 0.07           | 2.97 | 1.10 | 6.22  | 0.07 |
| Years                    | 1975-1984                                  | 233                                                          | 90                                     | -0.19 | -5.05 | 2.14 | 0.34           | 2.85 | 1.23 | 7.47  | 0.34 |
|                          | 1985-1994                                  | 1057                                                         | 91                                     | 0.05  | -2.78 | 2.54 | 0.47           | 2.64 | 0.89 | 5.00  | 0.47 |
|                          | 1995-2004                                  | 1423                                                         | 92                                     | 0.08  | -2.23 | 1.96 | 0.75           | 2.09 | 0.83 | 4.77  | 0.75 |
|                          | 2005-2014                                  | 1386                                                         | 93                                     | 0.13  | -2.73 | 2.12 | 0.90           | 2.40 | 0.98 | 5.32  | 0.90 |
| Data density             | Data poor                                  | 159                                                          | 89                                     | -0.09 | -2.49 | 1.70 | 0.93           | 2.25 | 0.76 | 4.67  | 0.93 |
|                          | Average data density                       | 431                                                          | 91                                     | 0.10  | -2.69 | 2.61 | 0.41           | 2.63 | 0.97 | 5.45  | 0.41 |
|                          | Data rich                                  | 3509                                                         | 92                                     | 0.07  | -2.66 | 2.13 | 0.87           | 2.39 | 0.90 | 5.03  | 0.87 |

<sup>†</sup> Estimated values minus held out values.

\* p-values for model error comparisons were calculated using the non-parametric Wilcoxon signed-rank test for paired data. The p-values are calculated assuming independence of the held-out observations. They should therefore be interpreted as an approximation because there is some dependence among the held-out observations, within each of the five repetitions for example.

**Test 1: Men, BMI 35 to <40 kg/m<sup>2</sup>**

| Data                     | No. of held out observations               | Percent covered                                              | Error (percentage points) <sup>†</sup> |       |       |      | Absolute error |      |      |      |      |
|--------------------------|--------------------------------------------|--------------------------------------------------------------|----------------------------------------|-------|-------|------|----------------|------|------|------|------|
|                          |                                            |                                                              | Median                                 | Q1    | Q3    | (p*) | Median         | Q1   | Q3   | (p*) |      |
| All                      | 4099                                       | 75                                                           | 0.00                                   | -0.72 | 0.50  | 0.00 | 0.59           | 0.17 | 1.40 | 0.00 |      |
| Super-region             | Central and Eastern Europe                 | 328                                                          | 77                                     | 0.61  | -0.38 | 1.42 | 0.00           | 0.98 | 0.57 | 1.80 | 0.00 |
|                          | Central Asia, Middle East and North Africa | 310                                                          | 87                                     | 0.26  | -0.97 | 1.12 | 0.11           | 1.09 | 0.48 | 1.99 | 0.11 |
|                          | East and South East Asia                   | 569                                                          | 61                                     | -0.02 | -0.19 | 0.01 | 0.02           | 0.07 | 0.01 | 0.21 | 0.02 |
|                          | High-income Asia Pacific                   | <i>No data from this region were among the held-out data</i> |                                        |       |       |      |                |      |      |      |      |
|                          | High-income Western countries              | 1822                                                         | 79                                     | -0.09 | -1.06 | 0.60 | 0.01           | 0.79 | 0.39 | 1.54 | 0.01 |
|                          | Latin America and Caribbean                | 379                                                          | 82                                     | -0.01 | -1.04 | 0.52 | 0.89           | 0.77 | 0.32 | 1.64 | 0.89 |
|                          | Oceania                                    | 163                                                          | 71                                     | 0.60  | -3.47 | 2.22 | 0.11           | 2.68 | 1.01 | 6.19 | 0.11 |
|                          | South Asia                                 | 330                                                          | 61                                     | 0.01  | -0.18 | 0.05 | 0.05           | 0.07 | 0.03 | 0.24 | 0.05 |
| Sub-Saharan Africa       | 198                                        | 62                                                           | 0.00                                   | -0.45 | 0.09  | 0.22 | 0.18           | 0.06 | 0.59 | 0.22 |      |
| Urban or rural studies   | Rural                                      | 469                                                          | 57                                     | 0.01  | -0.66 | 0.25 | 0.00           | 0.38 | 0.08 | 1.37 | 0.00 |
|                          | Urban                                      | 1263                                                         | 73                                     | -0.06 | -0.89 | 0.55 | 0.12           | 0.69 | 0.27 | 1.45 | 0.12 |
|                          | Both rural and urban                       | 2367                                                         | 79                                     | 0.00  | -0.62 | 0.53 | 0.00           | 0.57 | 0.14 | 1.37 | 0.00 |
| Study representativeness | Community                                  | 1698                                                         | 69                                     | -0.04 | -0.88 | 0.40 | 0.00           | 0.60 | 0.20 | 1.40 | 0.00 |
|                          | Sub-national                               | 626                                                          | 84                                     | -0.07 | -0.87 | 0.45 | 0.86           | 0.65 | 0.21 | 1.39 | 0.86 |
|                          | National                                   | 1775                                                         | 76                                     | 0.02  | -0.50 | 0.59 | 0.00           | 0.57 | 0.13 | 1.40 | 0.00 |
| Age band                 | 18-40                                      | 1549                                                         | 64                                     | 0.01  | -0.54 | 0.41 | 0.00           | 0.48 | 0.13 | 1.05 | 0.00 |
|                          | 40-60                                      | 1300                                                         | 87                                     | -0.01 | -0.80 | 0.64 | 0.92           | 0.73 | 0.23 | 1.63 | 0.92 |
|                          | 60 and above                               | 1250                                                         | 75                                     | 0.00  | -0.88 | 0.53 | 0.01           | 0.69 | 0.19 | 1.58 | 0.01 |
| Years                    | 1975-1984                                  | 233                                                          | 73                                     | -0.12 | -1.01 | 0.48 | 0.77           | 0.68 | 0.27 | 1.49 | 0.77 |
|                          | 1985-1994                                  | 1057                                                         | 66                                     | 0.00  | -0.61 | 0.48 | 0.00           | 0.54 | 0.15 | 1.14 | 0.00 |
|                          | 1995-2004                                  | 1423                                                         | 78                                     | -0.02 | -0.60 | 0.42 | 0.10           | 0.50 | 0.15 | 1.26 | 0.10 |
|                          | 2005-2014                                  | 1386                                                         | 78                                     | 0.02  | -0.90 | 0.66 | 0.02           | 0.76 | 0.20 | 1.84 | 0.02 |
| Data density             | Data poor                                  | 159                                                          | 69                                     | 0.03  | -0.67 | 0.38 | 0.09           | 0.53 | 0.25 | 1.30 | 0.09 |
|                          | Average data density                       | 431                                                          | 76                                     | 0.00  | -0.71 | 0.48 | 0.16           | 0.61 | 0.18 | 1.45 | 0.16 |
|                          | Data rich                                  | 3509                                                         | 75                                     | 0.00  | -0.72 | 0.51 | 0.00           | 0.59 | 0.16 | 1.40 | 0.00 |

<sup>†</sup> Estimated values minus held out values.

\* p-values for model error comparisons were calculated using the non-parametric Wilcoxon signed-rank test for paired data. The p-values are calculated assuming independence of the held-out observations. They should therefore be interpreted as an approximation because there is some dependence among the held-out observations, within each of the five repetitions for example.

**Test 1: Men, BMI  $\geq$  40 kg/m<sup>2</sup>**

| Data                     | No. of held out observations               | Percent covered                                              | Error (percentage points) <sup>†</sup> |       |       |      | Absolute error |      |      |      |      |
|--------------------------|--------------------------------------------|--------------------------------------------------------------|----------------------------------------|-------|-------|------|----------------|------|------|------|------|
|                          |                                            |                                                              | Median                                 | Q1    | Q3    | (p*) | Median         | Q1   | Q3   | (p*) |      |
| All                      | 4099                                       | 56                                                           | 0.01                                   | -0.23 | 0.13  | 0.00 | 0.16           | 0.04 | 0.48 | 0.00 |      |
| Super-region             | Central and Eastern Europe                 | 328                                                          | 50                                     | 0.14  | -0.07 | 0.33 | 0.00           | 0.26 | 0.12 | 0.54 | 0.00 |
|                          | Central Asia, Middle East and North Africa | 310                                                          | 74                                     | 0.04  | -0.38 | 0.23 | 0.49           | 0.29 | 0.12 | 0.58 | 0.49 |
|                          | East and South East Asia                   | 569                                                          | 51                                     | 0.00  | -0.05 | 0.00 | 0.01           | 0.01 | 0.00 | 0.05 | 0.01 |
|                          | High-income Asia Pacific                   | <i>No data from this region were among the held-out data</i> |                                        |       |       |      |                |      |      |      |      |
|                          | High-income Western countries              | 1822                                                         | 56                                     | 0.04  | -0.32 | 0.18 | 0.00           | 0.23 | 0.08 | 0.52 | 0.00 |
|                          | Latin America and Caribbean                | 379                                                          | 68                                     | -0.06 | -0.48 | 0.12 | 0.99           | 0.24 | 0.10 | 0.68 | 0.99 |
|                          | Oceania                                    | 163                                                          | 60                                     | 0.21  | -1.99 | 0.99 | 0.02           | 1.17 | 0.43 | 3.47 | 0.02 |
|                          | South Asia                                 | 330                                                          | 49                                     | 0.00  | -0.08 | 0.01 | 0.00           | 0.02 | 0.00 | 0.08 | 0.00 |
| Sub-Saharan Africa       | 198                                        | 47                                                           | 0.01                                   | -0.19 | 0.05  | 0.00 | 0.06           | 0.02 | 0.39 | 0.00 |      |
| Urban or rural studies   | Rural                                      | 469                                                          | 36                                     | 0.01  | -0.02 | 0.10 | 0.00           | 0.07 | 0.02 | 0.30 | 0.00 |
|                          | Urban                                      | 1263                                                         | 53                                     | 0.00  | -0.35 | 0.10 | 0.00           | 0.17 | 0.05 | 0.46 | 0.00 |
|                          | Both rural and urban                       | 2367                                                         | 62                                     | 0.01  | -0.21 | 0.18 | 0.00           | 0.19 | 0.05 | 0.53 | 0.00 |
| Study representativeness | Community                                  | 1698                                                         | 50                                     | 0.00  | -0.28 | 0.08 | 0.00           | 0.14 | 0.04 | 0.38 | 0.00 |
|                          | Sub-national                               | 626                                                          | 63                                     | 0.00  | -0.35 | 0.11 | 0.01           | 0.20 | 0.05 | 0.48 | 0.01 |
|                          | National                                   | 1775                                                         | 60                                     | 0.02  | -0.13 | 0.24 | 0.00           | 0.19 | 0.04 | 0.58 | 0.00 |
| Age band                 | 18-40                                      | 1549                                                         | 47                                     | 0.02  | -0.11 | 0.13 | 0.00           | 0.12 | 0.03 | 0.36 | 0.00 |
|                          | 40-60                                      | 1300                                                         | 68                                     | 0.00  | -0.34 | 0.16 | 0.00           | 0.24 | 0.06 | 0.60 | 0.00 |
|                          | 60 and above                               | 1250                                                         | 56                                     | 0.00  | -0.28 | 0.12 | 0.00           | 0.17 | 0.04 | 0.49 | 0.00 |
| Years                    | 1975-1984                                  | 233                                                          | 48                                     | 0.00  | -0.34 | 0.07 | 0.00           | 0.17 | 0.03 | 0.58 | 0.00 |
|                          | 1985-1994                                  | 1057                                                         | 44                                     | 0.01  | -0.14 | 0.09 | 0.00           | 0.11 | 0.03 | 0.29 | 0.00 |
|                          | 1995-2004                                  | 1423                                                         | 63                                     | 0.00  | -0.19 | 0.12 | 0.00           | 0.14 | 0.04 | 0.41 | 0.00 |
|                          | 2005-2014                                  | 1386                                                         | 61                                     | 0.02  | -0.34 | 0.27 | 0.00           | 0.30 | 0.07 | 0.75 | 0.00 |
| Data density             | Data poor                                  | 159                                                          | 49                                     | 0.03  | -0.17 | 0.25 | 0.00           | 0.22 | 0.06 | 0.67 | 0.00 |
|                          | Average data density                       | 431                                                          | 60                                     | 0.01  | -0.42 | 0.19 | 0.00           | 0.29 | 0.07 | 0.69 | 0.00 |
|                          | Data rich                                  | 3509                                                         | 56                                     | 0.01  | -0.21 | 0.12 | 0.00           | 0.15 | 0.04 | 0.45 | 0.00 |

<sup>†</sup> Estimated values minus held out values.

\* p-values for model error comparisons were calculated using the non-parametric Wilcoxon signed-rank test for paired data. The p-values are calculated assuming independence of the held-out observations. They should therefore be interpreted as an approximation because there is some dependence among the held-out observations, within each of the five repetitions for example.

### Test 1: Women, mean BMI

| Data                     | No. of held out observations               | Percent covered | Error (kg/m <sup>2</sup> ) <sup>†</sup> |       |       |      | Absolute error |      |      |      |      |
|--------------------------|--------------------------------------------|-----------------|-----------------------------------------|-------|-------|------|----------------|------|------|------|------|
|                          |                                            |                 | Median                                  | Q1    | Q3    | (p*) | Median         | Q1   | Q3   | (p*) |      |
| All                      | 4034                                       | 98              | -0.02                                   | -0.67 | 0.64  | 0.25 | 0.65           | 0.31 | 1.17 | 0.25 |      |
| Super-region             | Central and Eastern Europe                 | 383             | 97                                      | 0.13  | -0.99 | 1.13 | 0.60           | 1.07 | 0.58 | 1.50 | 0.60 |
|                          | Central Asia, Middle East and North Africa | 248             | 97                                      | 0.01  | -0.52 | 0.59 | 0.92           | 0.55 | 0.32 | 1.10 | 0.92 |
|                          | East and South East Asia                   | 155             | 100                                     | 0.09  | -0.69 | 0.74 | 0.97           | 0.71 | 0.32 | 1.13 | 0.97 |
|                          | High-income Asia Pacific                   | 53              | 100                                     | 0.04  | -0.46 | 0.52 | 0.75           | 0.49 | 0.33 | 0.87 | 0.75 |
|                          | High-income Western countries              | 1858            | 99                                      | -0.02 | -0.83 | 0.68 | 0.01           | 0.74 | 0.38 | 1.24 | 0.01 |
|                          | Latin America and Caribbean                | 280             | 100                                     | -0.07 | -0.48 | 0.34 | 0.62           | 0.43 | 0.20 | 0.82 | 0.62 |
|                          | Oceania                                    | 193             | 84                                      | -0.11 | -1.26 | 1.23 | 0.89           | 1.26 | 0.48 | 2.56 | 0.89 |
|                          | South Asia                                 | 371             | 100                                     | -0.02 | -0.35 | 0.47 | 0.68           | 0.42 | 0.21 | 0.76 | 0.68 |
| Sub-Saharan Africa       | 493                                        | 100             | -0.07                                   | -0.39 | 0.37  | 0.94 | 0.38           | 0.19 | 0.70 | 0.94 |      |
| Urban or rural studies   | Rural                                      | 410             | 99                                      | 0.03  | -0.78 | 0.85 | 0.92           | 0.79 | 0.36 | 1.43 | 0.92 |
|                          | Urban                                      | 1085            | 99                                      | 0.04  | -0.68 | 0.68 | 0.83           | 0.68 | 0.33 | 1.18 | 0.83 |
|                          | Both rural and urban                       | 2539            | 98                                      | -0.06 | -0.66 | 0.58 | 0.26           | 0.62 | 0.29 | 1.13 | 0.26 |
| Study representativeness | Community                                  | 1412            | 99                                      | 0.00  | -0.78 | 0.73 | 0.51           | 0.75 | 0.34 | 1.28 | 0.51 |
|                          | Sub-national                               | 644             | 97                                      | 0.01  | -0.78 | 0.74 | 0.57           | 0.76 | 0.35 | 1.26 | 0.57 |
|                          | National                                   | 1978            | 98                                      | -0.05 | -0.57 | 0.53 | 0.49           | 0.55 | 0.27 | 1.04 | 0.49 |
| Age band                 | 18-40                                      | 1647            | 99                                      | 0.17  | -0.39 | 0.85 | 0.01           | 0.61 | 0.28 | 1.14 | 0.01 |
|                          | 40-60                                      | 1247            | 97                                      | 0.10  | -0.41 | 0.64 | 0.26           | 0.53 | 0.26 | 0.87 | 0.26 |
|                          | 60 and above                               | 1140            | 98                                      | -0.63 | -1.35 | 0.20 | 0.00           | 0.92 | 0.44 | 1.56 | 0.00 |
| Years                    | 1975-1984                                  | 218             | 95                                      | 0.12  | -0.96 | 0.89 | 0.81           | 0.94 | 0.42 | 1.43 | 0.81 |
|                          | 1985-1994                                  | 1066            | 98                                      | 0.01  | -0.68 | 0.70 | 0.93           | 0.69 | 0.32 | 1.18 | 0.93 |
|                          | 1995-2004                                  | 1379            | 98                                      | -0.05 | -0.67 | 0.66 | 0.44           | 0.66 | 0.30 | 1.20 | 0.44 |
|                          | 2005-2014                                  | 1371            | 98                                      | -0.03 | -0.62 | 0.53 | 0.27           | 0.58 | 0.28 | 1.09 | 0.27 |
| Data density             | Data poor                                  | 180             | 98                                      | 0.02  | -0.79 | 0.53 | 0.70           | 0.67 | 0.29 | 1.35 | 0.70 |
|                          | Average data density                       | 786             | 98                                      | -0.04 | -0.52 | 0.54 | 0.94           | 0.53 | 0.27 | 1.17 | 0.94 |
|                          | Data rich                                  | 3068            | 98                                      | -0.02 | -0.70 | 0.66 | 0.19           | 0.68 | 0.32 | 1.16 | 0.19 |

<sup>†</sup> Estimated values minus held out values.

\* p-values for model error comparisons were calculated using the non-parametric Wilcoxon signed-rank test for paired data. The p-values are calculated assuming independence of the held-out observations. They should therefore be interpreted as an approximation because there is some dependence among the held-out observations, within each of the five repetitions for example.

**Test 1: Women, BMI < 18.5 kg/m<sup>2</sup>**

| Data                     | No. of held out observations               | Percent covered | Error (percentage points) <sup>†</sup> |       |        |       | Absolute error |       |      |       |      |
|--------------------------|--------------------------------------------|-----------------|----------------------------------------|-------|--------|-------|----------------|-------|------|-------|------|
|                          |                                            |                 | Median                                 | Q1    | Q3     | (p*)  | Median         | Q1    | Q3   | (p*)  |      |
| All                      | 4034                                       | 87              | 0.00                                   | -1.71 | 1.15   | 0.00  | 1.37           | 0.56  | 3.71 | 0.00  |      |
| Super-region             | Central and Eastern Europe                 | 383             | 85                                     | 0.08  | -1.12  | 0.65  | 0.06           | 0.72  | 0.31 | 1.97  | 0.06 |
|                          | Central Asia, Middle East and North Africa | 248             | 96                                     | -0.13 | -1.98  | 1.17  | 0.57           | 1.42  | 0.63 | 2.76  | 0.57 |
|                          | East and South East Asia                   | 155             | 100                                    | -0.85 | -6.94  | 2.60  | 0.37           | 3.73  | 1.73 | 7.99  | 0.37 |
|                          | High-income Asia Pacific                   | 53              | 100                                    | -1.87 | -5.26  | -0.39 | 0.01           | 2.23  | 1.09 | 5.26  | 0.01 |
|                          | High-income Western countries              | 1858            | 83                                     | 0.04  | -0.93  | 0.86  | 0.00           | 0.89  | 0.40 | 1.79  | 0.00 |
|                          | Latin America and Caribbean                | 280             | 82                                     | 0.43  | -0.68  | 1.68  | 0.01           | 1.16  | 0.52 | 2.76  | 0.01 |
|                          | Oceania                                    | 193             | 55                                     | 0.18  | -1.10  | 1.80  | 0.00           | 1.40  | 0.57 | 3.54  | 0.00 |
|                          | South Asia                                 | 371             | 96                                     | -6.96 | -17.55 | 2.62  | 0.00           | 10.07 | 4.47 | 18.69 | 0.00 |
| Sub-Saharan Africa       | 493                                        | 98              | 0.72                                   | -3.73 | 4.01   | 0.19  | 3.82           | 1.93  | 6.72 | 0.19  |      |
| Urban or rural studies   | Rural                                      | 410             | 78                                     | -1.19 | -10.93 | 1.11  | 0.64           | 3.30  | 1.14 | 11.51 | 0.64 |
|                          | Urban                                      | 1085            | 79                                     | -0.15 | -1.49  | 0.79  | 0.98           | 1.10  | 0.52 | 2.61  | 0.98 |
|                          | Both rural and urban                       | 2539            | 92                                     | 0.10  | -1.36  | 1.34  | 0.00           | 1.36  | 0.52 | 3.63  | 0.00 |
| Study representativeness | Community                                  | 1412            | 78                                     | -0.14 | -2.09  | 0.89  | 0.04           | 1.38  | 0.61 | 3.61  | 0.04 |
|                          | Sub-national                               | 644             | 88                                     | -0.13 | -1.21  | 0.84  | 0.23           | 1.03  | 0.42 | 2.63  | 0.23 |
|                          | National                                   | 1978            | 93                                     | 0.13  | -1.66  | 1.49  | 0.00           | 1.54  | 0.57 | 4.05  | 0.00 |
| Age band                 | 18-40                                      | 1647            | 91                                     | -0.05 | -2.78  | 1.94  | 0.04           | 2.29  | 1.01 | 5.07  | 0.04 |
|                          | 40-60                                      | 1247            | 86                                     | -0.05 | -1.13  | 0.68  | 0.70           | 0.83  | 0.37 | 2.24  | 0.70 |
|                          | 60 and above                               | 1140            | 82                                     | 0.11  | -1.25  | 1.05  | 0.00           | 1.11  | 0.46 | 2.97  | 0.00 |
| Years                    | 1975-1984                                  | 218             | 79                                     | -0.34 | -2.10  | 0.97  | 0.71           | 1.42  | 0.71 | 3.18  | 0.71 |
|                          | 1985-1994                                  | 1066            | 80                                     | 0.08  | -1.19  | 0.90  | 0.01           | 1.05  | 0.48 | 2.46  | 0.01 |
|                          | 1995-2004                                  | 1379            | 91                                     | 0.01  | -1.96  | 1.19  | 0.01           | 1.45  | 0.57 | 3.61  | 0.01 |
|                          | 2005-2014                                  | 1371            | 89                                     | -0.03 | -2.14  | 1.37  | 0.11           | 1.68  | 0.63 | 4.98  | 0.11 |
| Data density             | Data poor                                  | 180             | 82                                     | 0.36  | -1.62  | 2.38  | 0.01           | 2.12  | 0.76 | 3.92  | 0.01 |
|                          | Average data density                       | 786             | 89                                     | 0.30  | -2.01  | 2.13  | 0.19           | 2.07  | 0.78 | 4.68  | 0.19 |
|                          | Data rich                                  | 3068            | 86                                     | -0.06 | -1.68  | 0.95  | 0.00           | 1.22  | 0.51 | 3.33  | 0.00 |

<sup>†</sup> Estimated values minus held out values.

\* p-values for model error comparisons were calculated using the non-parametric Wilcoxon signed-rank test for paired data. The p-values are calculated assuming independence of the held-out observations. They should therefore be interpreted as an approximation because there is some dependence among the held-out observations, within each of the five repetitions for example.



**Test 1: Women, BMI 18.5 to <20 kg/m<sup>2</sup>**

| Data                     | No. of held out observations               | Percent covered | Error (percentage points) <sup>†</sup> |       |       |      | Absolute error |      |      |      |      |
|--------------------------|--------------------------------------------|-----------------|----------------------------------------|-------|-------|------|----------------|------|------|------|------|
|                          |                                            |                 | Median                                 | Q1    | Q3    | (p*) | Median         | Q1   | Q3   | (p*) |      |
| All                      | 4034                                       | 92              | 0.07                                   | -2.20 | 1.87  | 0.01 | 2.02           | 0.87 | 4.15 | 0.01 |      |
| Super-region             | Central and Eastern Europe                 | 383             | 96                                     | 0.32  | -1.93 | 1.20 | 0.05           | 1.40 | 0.67 | 2.67 | 0.05 |
|                          | Central Asia, Middle East and North Africa | 248             | 96                                     | -0.22 | -1.71 | 1.08 | 0.24           | 1.35 | 0.66 | 2.92 | 0.24 |
|                          | East and South East Asia                   | 155             | 99                                     | 0.30  | -3.81 | 3.17 | 0.57           | 3.42 | 1.48 | 5.70 | 0.57 |
|                          | High-income Asia Pacific                   | 53              | 94                                     | 0.59  | -2.62 | 2.32 | 0.13           | 2.62 | 1.01 | 5.52 | 0.13 |
|                          | High-income Western countries              | 1858            | 91                                     | -0.04 | -1.88 | 1.56 | 0.00           | 1.74 | 0.76 | 3.34 | 0.00 |
|                          | Latin America and Caribbean                | 280             | 91                                     | 0.38  | -1.17 | 2.22 | 0.08           | 1.79 | 0.79 | 3.30 | 0.08 |
|                          | Oceania                                    | 193             | 59                                     | 0.26  | -1.74 | 1.77 | 0.01           | 1.77 | 0.56 | 4.03 | 0.01 |
|                          | South Asia                                 | 371             | 98                                     | 0.76  | -3.02 | 4.89 | 0.05           | 3.91 | 1.83 | 6.69 | 0.05 |
| Sub-Saharan Africa       | 493                                        | 100             | -0.56                                  | -4.14 | 3.37  | 0.70 | 3.64           | 1.80 | 6.26 | 0.70 |      |
| Urban or rural studies   | Rural                                      | 410             | 86                                     | -0.53 | -3.53 | 1.92 | 0.59           | 2.59 | 1.23 | 5.16 | 0.59 |
|                          | Urban                                      | 1085            | 90                                     | -0.44 | -2.79 | 1.60 | 0.18           | 2.16 | 0.95 | 4.14 | 0.18 |
|                          | Both rural and urban                       | 2539            | 94                                     | 0.34  | -1.69 | 2.01 | 0.00           | 1.87 | 0.80 | 4.02 | 0.00 |
| Study representativeness | Community                                  | 1412            | 88                                     | -0.13 | -2.68 | 1.88 | 0.37           | 2.32 | 1.04 | 4.44 | 0.37 |
|                          | Sub-national                               | 644             | 92                                     | 0.03  | -2.14 | 1.75 | 0.28           | 1.86 | 0.83 | 3.63 | 0.28 |
|                          | National                                   | 1978            | 95                                     | 0.23  | -1.78 | 1.92 | 0.02           | 1.88 | 0.77 | 4.10 | 0.02 |
| Age band                 | 18-40                                      | 1647            | 96                                     | -0.10 | -3.39 | 2.92 | 0.83           | 3.06 | 1.37 | 5.86 | 0.83 |
|                          | 40-60                                      | 1247            | 92                                     | 0.05  | -1.65 | 1.43 | 0.99           | 1.51 | 0.63 | 2.98 | 0.99 |
|                          | 60 and above                               | 1140            | 87                                     | 0.27  | -1.45 | 1.62 | 0.00           | 1.57 | 0.72 | 3.12 | 0.00 |
| Years                    | 1975-1984                                  | 218             | 84                                     | -0.67 | -3.31 | 1.57 | 0.81           | 2.37 | 1.10 | 4.64 | 0.81 |
|                          | 1985-1994                                  | 1066            | 89                                     | 0.08  | -2.18 | 1.71 | 0.39           | 1.90 | 0.91 | 3.60 | 0.39 |
|                          | 1995-2004                                  | 1379            | 94                                     | 0.25  | -2.14 | 1.88 | 0.02           | 1.96 | 0.79 | 4.02 | 0.02 |
|                          | 2005-2014                                  | 1371            | 94                                     | 0.00  | -2.13 | 2.17 | 0.18           | 2.15 | 0.91 | 4.58 | 0.18 |
| Data density             | Data poor                                  | 180             | 84                                     | 0.53  | -1.88 | 2.92 | 0.11           | 2.43 | 0.89 | 4.85 | 0.11 |
|                          | Average data density                       | 786             | 94                                     | -0.11 | -2.31 | 2.23 | 0.96           | 2.28 | 1.00 | 4.60 | 0.96 |
|                          | Data rich                                  | 3068            | 92                                     | 0.07  | -2.17 | 1.79 | 0.01           | 1.93 | 0.84 | 4.03 | 0.01 |

<sup>†</sup> Estimated values minus held out values.

\* p-values for model error comparisons were calculated using the non-parametric Wilcoxon signed-rank test for paired data. The p-values are calculated assuming independence of the held-out observations. They should therefore be interpreted as an approximation because there is some dependence among the held-out observations, within each of the five repetitions for example.

### Test 1: Women, BMI 20 to <25 kg/m<sup>2</sup>

| Data                     | No. of held out observations               | Percent covered | Error (percentage points) <sup>†</sup> |       |       |       | Absolute error |      |       |       |      |
|--------------------------|--------------------------------------------|-----------------|----------------------------------------|-------|-------|-------|----------------|------|-------|-------|------|
|                          |                                            |                 | Median                                 | Q1    | Q3    | (p*)  | Median         | Q1   | Q3    | (p*)  |      |
| All                      | 4034                                       | 99              | 1.80                                   | -4.05 | 8.40  | 0.00  | 6.19           | 2.85 | 11.69 | 0.00  |      |
| Super-region             | Central and Eastern Europe                 | 383             | 100                                    | 3.99  | -1.74 | 9.34  | 0.00           | 6.28 | 2.77  | 9.92  | 0.00 |
|                          | Central Asia, Middle East and North Africa | 248             | 100                                    | 0.74  | -4.13 | 5.61  | 0.95           | 4.81 | 2.39  | 8.11  | 0.95 |
|                          | East and South East Asia                   | 155             | 99                                     | -0.61 | -5.82 | 4.52  | 0.79           | 5.08 | 2.50  | 8.46  | 0.79 |
|                          | High-income Asia Pacific                   | 53              | 100                                    | 7.98  | 2.50  | 15.63 | 0.00           | 8.26 | 3.13  | 15.63 | 0.00 |
|                          | High-income Western countries              | 1858            | 99                                     | 1.13  | -4.56 | 8.03  | 0.00           | 6.18 | 2.89  | 11.83 | 0.00 |
|                          | Latin America and Caribbean                | 280             | 100                                    | 1.51  | -3.43 | 7.42  | 0.08           | 5.46 | 2.30  | 10.70 | 0.08 |
|                          | Oceania                                    | 193             | 94                                     | 6.19  | -3.11 | 14.21 | 0.00           | 9.32 | 4.71  | 17.38 | 0.00 |
|                          | South Asia                                 | 371             | 98                                     | 7.35  | 0.22  | 15.75 | 0.00           | 9.08 | 4.12  | 17.72 | 0.00 |
| Sub-Saharan Africa       | 493                                        | 100             | -0.37                                  | -4.93 | 5.13  | 0.98  | 5.06           | 2.46 | 8.95  | 0.98  |      |
| Urban or rural studies   | Rural                                      | 410             | 97                                     | 6.29  | -1.04 | 16.00 | 0.00           | 8.93 | 4.09  | 18.02 | 0.00 |
|                          | Urban                                      | 1085            | 99                                     | 0.28  | -6.61 | 7.70  | 0.53           | 7.34 | 3.61  | 13.19 | 0.53 |
|                          | Both rural and urban                       | 2539            | 99                                     | 1.82  | -3.22 | 7.76  | 0.00           | 5.46 | 2.48  | 10.05 | 0.00 |
| Study representativeness | Community                                  | 1412            | 99                                     | 2.45  | -4.77 | 10.76 | 0.00           | 7.56 | 3.62  | 13.95 | 0.00 |
|                          | Sub-national                               | 644             | 99                                     | 0.59  | -6.23 | 8.41  | 0.22           | 7.05 | 3.45  | 13.20 | 0.22 |
|                          | National                                   | 1978            | 99                                     | 1.80  | -2.87 | 7.30  | 0.00           | 5.14 | 2.33  | 9.39  | 0.00 |
| Age band                 | 18-40                                      | 1647            | 99                                     | 1.40  | -4.34 | 8.24  | 0.00           | 6.02 | 2.72  | 11.73 | 0.00 |
|                          | 40-60                                      | 1247            | 100                                    | 1.19  | -4.37 | 7.28  | 0.00           | 5.95 | 2.77  | 10.93 | 0.00 |
|                          | 60 and above                               | 1140            | 99                                     | 3.22  | -3.16 | 9.86  | 0.00           | 6.70 | 3.20  | 12.79 | 0.00 |
| Years                    | 1975-1984                                  | 218             | 99                                     | 0.89  | -5.69 | 12.58 | 0.17           | 8.08 | 4.16  | 14.79 | 0.17 |
|                          | 1985-1994                                  | 1066            | 99                                     | 0.84  | -5.15 | 8.31  | 0.07           | 6.50 | 3.21  | 12.37 | 0.07 |
|                          | 1995-2004                                  | 1379            | 99                                     | 2.31  | -3.32 | 8.91  | 0.00           | 6.28 | 2.76  | 11.88 | 0.00 |
|                          | 2005-2014                                  | 1371            | 99                                     | 2.09  | -3.47 | 7.74  | 0.00           | 5.67 | 2.55  | 10.25 | 0.00 |
| Data density             | Data poor                                  | 180             | 100                                    | 2.51  | -3.17 | 9.98  | 0.02           | 6.42 | 2.81  | 12.29 | 0.02 |
|                          | Average data density                       | 786             | 99                                     | 1.28  | -4.48 | 7.15  | 0.14           | 6.13 | 2.67  | 11.04 | 0.14 |
|                          | Data rich                                  | 3068            | 99                                     | 1.87  | -3.95 | 8.71  | 0.00           | 6.19 | 2.91  | 11.80 | 0.00 |

<sup>†</sup> Estimated values minus held out values.

\* p-values for model error comparisons were calculated using the non-parametric Wilcoxon signed-rank test for paired data. The p-values are calculated assuming independence of the held-out observations. They should therefore be interpreted as an approximation because there is some dependence among the held-out observations, within each of the five repetitions for example.

### Test 1: Women, BMI 25 to <30 kg/m<sup>2</sup>

| Data                     | No. of held out observations               | Percent covered | Error (percentage points) <sup>†</sup> |       |       |       | Absolute error |       |      |       |      |
|--------------------------|--------------------------------------------|-----------------|----------------------------------------|-------|-------|-------|----------------|-------|------|-------|------|
|                          |                                            |                 | Median                                 | Q1    | Q3    | (p*)  | Median         | Q1    | Q3   | (p*)  |      |
| All                      | 4034                                       | 98              | 0.16                                   | -4.04 | 5.08  | 0.59  | 4.55           | 2.09  | 8.44 | 0.59  |      |
| Super-region             | Central and Eastern Europe                 | 383             | 99                                     | 1.05  | -2.14 | 4.40  | 0.99           | 3.35  | 1.52 | 6.03  | 0.99 |
|                          | Central Asia, Middle East and North Africa | 248             | 100                                    | 0.41  | -3.58 | 5.63  | 0.22           | 4.82  | 2.05 | 7.53  | 0.22 |
|                          | East and South East Asia                   | 155             | 99                                     | 2.31  | -3.83 | 7.50  | 0.06           | 6.04  | 3.17 | 9.47  | 0.06 |
|                          | High-income Asia Pacific                   | 53              | 100                                    | -1.13 | -5.32 | 1.64  | 0.11           | 3.48  | 1.29 | 5.62  | 0.11 |
|                          | High-income Western countries              | 1858            | 99                                     | -0.76 | -4.29 | 4.16  | 0.00           | 4.25  | 2.06 | 7.75  | 0.00 |
|                          | Latin America and Caribbean                | 280             | 98                                     | -0.84 | -5.07 | 3.45  | 0.54           | 4.49  | 1.89 | 8.24  | 0.54 |
|                          | Oceania                                    | 193             | 96                                     | 3.73  | -4.00 | 14.18 | 0.00           | 10.48 | 3.95 | 17.50 | 0.00 |
|                          | South Asia                                 | 371             | 95                                     | 1.75  | -4.68 | 6.80  | 0.00           | 6.24  | 2.73 | 10.95 | 0.00 |
| Sub-Saharan Africa       | 493                                        | 99              | 1.39                                   | -3.56 | 5.37  | 0.03  | 4.72           | 2.20  | 8.94 | 0.03  |      |
| Urban or rural studies   | Rural                                      | 410             | 91                                     | 2.86  | -3.06 | 8.77  | 0.00           | 6.26  | 2.92 | 11.25 | 0.00 |
|                          | Urban                                      | 1085            | 99                                     | 1.35  | -3.28 | 6.78  | 0.02           | 5.24  | 2.33 | 9.36  | 0.02 |
|                          | Both rural and urban                       | 2539            | 99                                     | -0.62 | -4.33 | 3.91  | 0.05           | 4.14  | 1.96 | 7.56  | 0.05 |
| Study representativeness | Community                                  | 1412            | 97                                     | 1.22  | -3.67 | 7.01  | 0.05           | 5.43  | 2.39 | 9.84  | 0.05 |
|                          | Sub-national                               | 644             | 99                                     | -0.07 | -4.16 | 5.03  | 0.99           | 4.62  | 2.39 | 7.94  | 0.99 |
|                          | National                                   | 1978            | 99                                     | -0.49 | -4.07 | 3.91  | 0.30           | 4.04  | 1.88 | 7.48  | 0.30 |
| Age band                 | 18-40                                      | 1647            | 97                                     | 0.76  | -3.57 | 5.43  | 0.01           | 4.57  | 2.11 | 8.50  | 0.01 |
|                          | 40-60                                      | 1247            | 100                                    | 0.15  | -3.77 | 4.91  | 0.79           | 4.31  | 2.08 | 8.02  | 0.79 |
|                          | 60 and above                               | 1140            | 98                                     | -0.72 | -4.65 | 4.82  | 0.00           | 4.74  | 2.11 | 8.94  | 0.00 |
| Years                    | 1975-1984                                  | 218             | 99                                     | 2.11  | -3.69 | 7.96  | 0.08           | 5.64  | 2.76 | 10.62 | 0.08 |
|                          | 1985-1994                                  | 1066            | 99                                     | 0.72  | -3.56 | 5.72  | 0.27           | 4.59  | 2.18 | 8.73  | 0.27 |
|                          | 1995-2004                                  | 1379            | 97                                     | 0.03  | -4.14 | 5.08  | 0.75           | 4.61  | 2.13 | 8.21  | 0.75 |
|                          | 2005-2014                                  | 1371            | 99                                     | -0.38 | -4.26 | 4.45  | 0.44           | 4.36  | 1.93 | 8.18  | 0.44 |
| Data density             | Data poor                                  | 180             | 96                                     | 0.14  | -5.90 | 6.61  | 0.85           | 6.49  | 2.90 | 10.89 | 0.85 |
|                          | Average data density                       | 786             | 99                                     | 0.49  | -4.14 | 5.04  | 0.12           | 4.61  | 2.18 | 8.77  | 0.12 |
|                          | Data rich                                  | 3068            | 98                                     | -0.02 | -3.90 | 4.98  | 0.66           | 4.44  | 2.05 | 8.28  | 0.66 |

<sup>†</sup> Estimated values minus held out values.

\* p-values for model error comparisons were calculated using the non-parametric Wilcoxon signed-rank test for paired data. The p-values are calculated assuming independence of the held-out observations. They should therefore be interpreted as an approximation because there is some dependence among the held-out observations, within each of the five repetitions for example.

### Test 1: Women, BMI 30 to <35 kg/m<sup>2</sup>

| Data                     | No. of held out observations               | Percent covered | Error (percentage points) <sup>†</sup> |       |       |      | Absolute error |      |      |       |      |
|--------------------------|--------------------------------------------|-----------------|----------------------------------------|-------|-------|------|----------------|------|------|-------|------|
|                          |                                            |                 | Median                                 | Q1    | Q3    | (p*) | Median         | Q1   | Q3   | (p*)  |      |
| All                      | 4034                                       | 94              | 0.23                                   | -3.23 | 2.85  | 0.34 | 2.99           | 1.30 | 5.68 | 0.34  |      |
| Super-region             | Central and Eastern Europe                 | 383             | 96                                     | 0.13  | -4.94 | 2.80 | 0.15           | 3.52 | 1.78 | 5.94  | 0.15 |
|                          | Central Asia, Middle East and North Africa | 248             | 96                                     | 0.58  | -3.26 | 3.01 | 0.39           | 3.16 | 1.45 | 6.08  | 0.39 |
|                          | East and South East Asia                   | 155             | 95                                     | 0.98  | -0.96 | 3.95 | 0.00           | 2.16 | 0.97 | 4.25  | 0.00 |
|                          | High-income Asia Pacific                   | 53              | 92                                     | -0.64 | -3.59 | 0.15 | 0.02           | 1.25 | 0.41 | 3.64  | 0.02 |
|                          | High-income Western countries              | 1858            | 96                                     | 0.33  | -3.55 | 3.14 | 0.45           | 3.32 | 1.49 | 6.08  | 0.45 |
|                          | Latin America and Caribbean                | 280             | 96                                     | -0.96 | -3.63 | 1.89 | 0.71           | 2.98 | 1.44 | 5.41  | 0.71 |
|                          | Oceania                                    | 193             | 91                                     | -0.52 | -4.83 | 4.48 | 0.77           | 4.77 | 1.99 | 10.27 | 0.77 |
|                          | South Asia                                 | 371             | 89                                     | 0.28  | -1.53 | 2.19 | 0.00           | 1.98 | 0.76 | 3.88  | 0.00 |
| Sub-Saharan Africa       | 493                                        | 90              | 0.35                                   | -1.97 | 2.42  | 0.06 | 2.22           | 0.66 | 4.67 | 0.06  |      |
| Urban or rural studies   | Rural                                      | 410             | 84                                     | 0.60  | -3.34 | 2.70 | 0.03           | 2.99 | 1.34 | 6.12  | 0.03 |
|                          | Urban                                      | 1085            | 95                                     | 0.94  | -3.65 | 4.30 | 0.01           | 4.09 | 1.91 | 6.93  | 0.01 |
|                          | Both rural and urban                       | 2539            | 96                                     | -0.02 | -3.06 | 2.27 | 0.53           | 2.58 | 1.11 | 5.04  | 0.53 |
| Study representativeness | Community                                  | 1412            | 92                                     | 0.36  | -4.18 | 3.43 | 0.38           | 3.75 | 1.65 | 6.81  | 0.38 |
|                          | Sub-national                               | 644             | 96                                     | 0.60  | -3.57 | 3.86 | 0.33           | 3.72 | 1.61 | 6.77  | 0.33 |
|                          | National                                   | 1978            | 95                                     | 0.12  | -2.52 | 2.20 | 0.87           | 2.34 | 1.00 | 4.63  | 0.87 |
| Age band                 | 18-40                                      | 1647            | 90                                     | 0.21  | -2.04 | 1.98 | 0.16           | 2.02 | 0.83 | 3.93  | 0.16 |
|                          | 40-60                                      | 1247            | 99                                     | 0.65  | -3.44 | 3.53 | 0.34           | 3.51 | 1.65 | 6.20  | 0.34 |
|                          | 60 and above                               | 1140            | 96                                     | -0.28 | -5.32 | 3.69 | 0.00           | 4.42 | 1.99 | 7.85  | 0.00 |
| Years                    | 1975-1984                                  | 218             | 94                                     | 0.32  | -5.15 | 4.28 | 0.78           | 4.42 | 2.07 | 8.19  | 0.78 |
|                          | 1985-1994                                  | 1066            | 95                                     | 0.61  | -3.22 | 3.13 | 0.18           | 3.14 | 1.29 | 5.89  | 0.18 |
|                          | 1995-2004                                  | 1379            | 93                                     | 0.17  | -3.19 | 2.56 | 0.71           | 2.82 | 1.25 | 5.45  | 0.71 |
|                          | 2005-2014                                  | 1371            | 95                                     | 0.02  | -3.15 | 2.62 | 0.67           | 2.86 | 1.27 | 5.36  | 0.67 |
| Data density             | Data poor                                  | 180             | 93                                     | -0.18 | -5.25 | 2.52 | 0.40           | 3.66 | 1.89 | 7.96  | 0.40 |
|                          | Average data density                       | 786             | 93                                     | -0.08 | -3.42 | 2.89 | 0.28           | 3.17 | 1.21 | 5.82  | 0.28 |
|                          | Data rich                                  | 3068            | 95                                     | 0.30  | -2.99 | 2.85 | 0.50           | 2.90 | 1.30 | 5.59  | 0.50 |

<sup>†</sup> Estimated values minus held out values.

\* p-values for model error comparisons were calculated using the non-parametric Wilcoxon signed-rank test for paired data. The p-values are calculated assuming independence of the held-out observations. They should therefore be interpreted as an approximation because there is some dependence among the held-out observations, within each of the five repetitions for example.

### Test 1: Women, BMI 35 to <40 kg/m<sup>2</sup>

| Data                     | No. of held out observations               | Percent covered | Error (percentage points) <sup>†</sup> |       |       |       | Absolute error |      |      |       |      |
|--------------------------|--------------------------------------------|-----------------|----------------------------------------|-------|-------|-------|----------------|------|------|-------|------|
|                          |                                            |                 | Median                                 | Q1    | Q3    | (p*)  | Median         | Q1   | Q3   | (p*)  |      |
| All                      | 4034                                       | 85              | 0.06                                   | -1.40 | 1.09  | 0.10  | 1.20           | 0.42 | 2.72 | 0.10  |      |
| Super-region             | Central and Eastern Europe                 | 383             | 89                                     | -0.50 | -2.84 | 0.66  | 0.01           | 1.47 | 0.63 | 3.23  | 0.01 |
|                          | Central Asia, Middle East and North Africa | 248             | 93                                     | 0.36  | -1.34 | 1.75  | 0.08           | 1.57 | 0.67 | 3.42  | 0.08 |
|                          | East and South East Asia                   | 155             | 79                                     | 0.07  | -0.23 | 0.42  | 0.02           | 0.34 | 0.14 | 0.78  | 0.02 |
|                          | High-income Asia Pacific                   | 53              | 83                                     | -0.36 | -1.26 | -0.02 | 0.00           | 0.41 | 0.20 | 1.26  | 0.00 |
|                          | High-income Western countries              | 1858            | 87                                     | 0.25  | -1.48 | 1.51  | 0.89           | 1.50 | 0.67 | 2.83  | 0.89 |
|                          | Latin America and Caribbean                | 280             | 91                                     | 0.07  | -1.16 | 1.42  | 0.61           | 1.32 | 0.52 | 2.80  | 0.61 |
|                          | Oceania                                    | 193             | 85                                     | -0.52 | -8.54 | 3.19  | 0.12           | 5.64 | 2.23 | 10.31 | 0.12 |
|                          | South Asia                                 | 371             | 75                                     | 0.01  | -0.54 | 0.24  | 0.24           | 0.35 | 0.10 | 0.80  | 0.24 |
| Sub-Saharan Africa       | 493                                        | 79              | 0.03                                   | -0.72 | 0.52  | 0.10  | 0.59           | 0.15 | 1.73 | 0.10  |      |
| Urban or rural studies   | Rural                                      | 410             | 70                                     | 0.07  | -1.02 | 0.49  | 0.00           | 0.65 | 0.20 | 2.22  | 0.00 |
|                          | Urban                                      | 1085            | 86                                     | 0.32  | -1.79 | 1.71  | 0.02           | 1.72 | 0.78 | 3.24  | 0.02 |
|                          | Both rural and urban                       | 2539            | 88                                     | 0.02  | -1.36 | 0.92  | 0.90           | 1.09 | 0.38 | 2.49  | 0.90 |
| Study representativeness | Community                                  | 1412            | 83                                     | 0.08  | -1.90 | 1.14  | 0.33           | 1.41 | 0.52 | 2.96  | 0.33 |
|                          | Sub-national                               | 644             | 89                                     | 0.17  | -1.43 | 1.54  | 0.13           | 1.47 | 0.63 | 3.17  | 0.13 |
|                          | National                                   | 1978            | 86                                     | 0.04  | -1.09 | 0.91  | 0.42           | 0.98 | 0.34 | 2.39  | 0.42 |
| Age band                 | 18-40                                      | 1647            | 74                                     | 0.04  | -0.79 | 0.65  | 0.00           | 0.70 | 0.24 | 1.66  | 0.00 |
|                          | 40-60                                      | 1247            | 96                                     | 0.16  | -1.82 | 1.60  | 0.73           | 1.69 | 0.66 | 3.27  | 0.73 |
|                          | 60 and above                               | 1140            | 90                                     | 0.04  | -2.33 | 1.37  | 0.37           | 1.72 | 0.67 | 3.49  | 0.37 |
| Years                    | 1975-1984                                  | 218             | 85                                     | 0.11  | -2.64 | 1.32  | 0.39           | 1.77 | 0.76 | 4.62  | 0.39 |
|                          | 1985-1994                                  | 1066            | 83                                     | 0.06  | -1.64 | 1.06  | 0.34           | 1.22 | 0.45 | 2.75  | 0.34 |
|                          | 1995-2004                                  | 1379            | 86                                     | 0.04  | -1.30 | 0.89  | 0.28           | 1.04 | 0.35 | 2.46  | 0.28 |
|                          | 2005-2014                                  | 1371            | 86                                     | 0.11  | -1.30 | 1.28  | 0.29           | 1.29 | 0.45 | 2.77  | 0.29 |
| Data density             | Data poor                                  | 180             | 87                                     | -0.09 | -3.10 | 1.01  | 0.50           | 1.74 | 0.56 | 4.73  | 0.50 |
|                          | Average data density                       | 786             | 85                                     | 0.07  | -1.40 | 1.17  | 0.07           | 1.24 | 0.41 | 3.22  | 0.07 |
|                          | Data rich                                  | 3068            | 85                                     | 0.07  | -1.34 | 1.05  | 0.33           | 1.17 | 0.42 | 2.57  | 0.33 |

<sup>†</sup> Estimated values minus held out values.

\* p-values for model error comparisons were calculated using the non-parametric Wilcoxon signed-rank test for paired data. The p-values are calculated assuming independence of the held-out observations. They should therefore be interpreted as an approximation because there is some dependence among the held-out observations, within each of the five repetitions for example.

**Test 1: Women, BMI  $\geq$  40 kg/m<sup>2</sup>**

| Data                     | No. of held out observations               | Percent covered | Error (percentage points) <sup>†</sup> |       |        |      | Absolute error |      |      |       |      |
|--------------------------|--------------------------------------------|-----------------|----------------------------------------|-------|--------|------|----------------|------|------|-------|------|
|                          |                                            |                 | Median                                 | Q1    | Q3     | (p*) | Median         | Q1   | Q3   | (p*)  |      |
| All                      | 4034                                       | 75              | 0.03                                   | -0.72 | 0.44   | 0.00 | 0.55           | 0.17 | 1.42 | 0.00  |      |
| Super-region             | Central and Eastern Europe                 | 383             | 80                                     | -0.23 | -1.33  | 0.19 | 0.01           | 0.64 | 0.20 | 1.49  | 0.01 |
|                          | Central Asia, Middle East and North Africa | 248             | 87                                     | 0.03  | -1.30  | 0.78 | 0.90           | 0.99 | 0.33 | 2.08  | 0.90 |
|                          | East and South East Asia                   | 155             | 62                                     | 0.01  | -0.08  | 0.12 | 0.00           | 0.10 | 0.04 | 0.26  | 0.00 |
|                          | High-income Asia Pacific                   | 53              | 60                                     | -0.19 | -0.40  | 0.01 | 0.03           | 0.19 | 0.03 | 0.40  | 0.03 |
|                          | High-income Western countries              | 1858            | 75                                     | 0.11  | -0.76  | 0.69 | 0.62           | 0.71 | 0.29 | 1.50  | 0.62 |
|                          | Latin America and Caribbean                | 280             | 83                                     | -0.03 | -0.78  | 0.62 | 0.84           | 0.67 | 0.23 | 1.41  | 0.84 |
|                          | Oceania                                    | 193             | 74                                     | -0.38 | -10.21 | 1.04 | 0.03           | 3.32 | 0.75 | 10.21 | 0.03 |
|                          | South Asia                                 | 371             | 62                                     | 0.01  | -0.14  | 0.07 | 0.00           | 0.08 | 0.03 | 0.25  | 0.00 |
| Sub-Saharan Africa       | 493                                        | 73              | 0.02                                   | -0.43 | 0.32   | 0.01 | 0.35           | 0.08 | 1.02 | 0.01  |      |
| Urban or rural studies   | Rural                                      | 410             | 48                                     | 0.03  | -0.48  | 0.26 | 0.00           | 0.33 | 0.06 | 1.17  | 0.00 |
|                          | Urban                                      | 1085            | 73                                     | 0.10  | -0.78  | 0.60 | 0.00           | 0.67 | 0.26 | 1.48  | 0.00 |
|                          | Both rural and urban                       | 2539            | 80                                     | 0.01  | -0.71  | 0.40 | 0.48           | 0.55 | 0.15 | 1.42  | 0.48 |
| Study representativeness | Community                                  | 1412            | 69                                     | 0.03  | -0.90  | 0.40 | 0.01           | 0.57 | 0.19 | 1.40  | 0.01 |
|                          | Sub-national                               | 644             | 80                                     | 0.08  | -0.63  | 0.72 | 0.01           | 0.68 | 0.22 | 1.67  | 0.01 |
|                          | National                                   | 1978            | 77                                     | 0.02  | -0.61  | 0.39 | 0.10           | 0.50 | 0.13 | 1.37  | 0.10 |
| Age band                 | 18-40                                      | 1647            | 62                                     | 0.02  | -0.42  | 0.22 | 0.00           | 0.28 | 0.08 | 0.84  | 0.00 |
|                          | 40-60                                      | 1247            | 89                                     | 0.03  | -0.91  | 0.73 | 0.79           | 0.80 | 0.33 | 1.84  | 0.79 |
|                          | 60 and above                               | 1140            | 77                                     | 0.03  | -0.99  | 0.64 | 0.29           | 0.78 | 0.29 | 1.77  | 0.29 |
| Years                    | 1975-1984                                  | 218             | 68                                     | 0.04  | -0.69  | 0.48 | 0.11           | 0.61 | 0.24 | 1.70  | 0.11 |
|                          | 1985-1994                                  | 1066            | 71                                     | 0.02  | -0.74  | 0.37 | 0.02           | 0.52 | 0.17 | 1.17  | 0.02 |
|                          | 1995-2004                                  | 1379            | 76                                     | 0.02  | -0.63  | 0.39 | 0.11           | 0.49 | 0.13 | 1.30  | 0.11 |
|                          | 2005-2014                                  | 1371            | 77                                     | 0.04  | -0.82  | 0.60 | 0.05           | 0.68 | 0.19 | 1.73  | 0.05 |
| Data density             | Data poor                                  | 180             | 72                                     | 0.06  | -1.29  | 0.78 | 0.11           | 0.82 | 0.31 | 2.33  | 0.11 |
|                          | Average data density                       | 786             | 76                                     | 0.02  | -0.75  | 0.40 | 0.04           | 0.54 | 0.13 | 1.65  | 0.04 |
|                          | Data rich                                  | 3068            | 74                                     | 0.03  | -0.70  | 0.43 | 0.01           | 0.55 | 0.17 | 1.35  | 0.01 |

<sup>†</sup> Estimated values minus held out values.

\* p-values for model error comparisons were calculated using the non-parametric Wilcoxon signed-rank test for paired data. The p-values are calculated assuming independence of the held-out observations. They should therefore be interpreted as an approximation because there is some dependence among the held-out observations, within each of the five repetitions for example.

## Test 2: Men, mean BMI

| Data                     | No. of held out observations               | Percent covered                                          | Error (kg/m <sup>2</sup> ) <sup>†</sup> |       |       |      | Absolute error |      |      |      |      |
|--------------------------|--------------------------------------------|----------------------------------------------------------|-----------------------------------------|-------|-------|------|----------------|------|------|------|------|
|                          |                                            |                                                          | Median                                  | Q1    | Q3    | (p*) | Median         | Q1   | Q3   | (p*) |      |
| All                      | 3530                                       | 95                                                       | -0.01                                   | -0.30 | 0.24  | 0.34 | 0.27           | 0.12 | 0.54 | 0.34 |      |
| Super-region             | Central and Eastern Europe                 | 292                                                      | 97                                      | 0.00  | -0.27 | 0.22 | 0.78           | 0.24 | 0.10 | 0.50 | 0.78 |
|                          | Central Asia, Middle East and North Africa | 322                                                      | 93                                      | -0.01 | -0.34 | 0.39 | 0.90           | 0.37 | 0.18 | 0.74 | 0.90 |
|                          | East and South East Asia                   | 376                                                      | 94                                      | 0.00  | -0.22 | 0.22 | 0.84           | 0.22 | 0.11 | 0.41 | 0.84 |
|                          | High-income Asia Pacific                   | 354                                                      | 97                                      | 0.01  | -0.19 | 0.18 | 0.60           | 0.18 | 0.08 | 0.37 | 0.60 |
|                          | High-income Western countries              | 1140                                                     | 95                                      | -0.01 | -0.28 | 0.23 | 0.38           | 0.25 | 0.10 | 0.49 | 0.38 |
|                          | Latin America and Caribbean                | 426                                                      | 96                                      | 0.00  | -0.33 | 0.29 | 0.48           | 0.31 | 0.14 | 0.64 | 0.48 |
|                          | Oceania                                    | 133                                                      | 87                                      | -0.05 | -0.63 | 0.48 | 0.75           | 0.56 | 0.25 | 1.14 | 0.75 |
|                          | South Asia                                 | 210                                                      | 90                                      | 0.00  | -0.35 | 0.27 | 0.97           | 0.29 | 0.15 | 0.55 | 0.97 |
| Sub-Saharan Africa       | 277                                        | 95                                                       | -0.08                                   | -0.40 | 0.28  | 0.55 | 0.33           | 0.18 | 0.65 | 0.55 |      |
| Urban or rural studies   | Rural                                      | 455                                                      | 93                                      | -0.04 | -0.42 | 0.29 | 0.50           | 0.34 | 0.15 | 0.65 | 0.50 |
|                          | Urban                                      | 822                                                      | 94                                      | -0.02 | -0.37 | 0.29 | 0.28           | 0.32 | 0.14 | 0.62 | 0.28 |
|                          | Both rural and urban                       | 2253                                                     | 95                                      | 0.00  | -0.26 | 0.23 | 0.69           | 0.24 | 0.11 | 0.48 | 0.69 |
| Study representativeness | Community                                  | 1279                                                     | 94                                      | -0.03 | -0.41 | 0.29 | 0.20           | 0.33 | 0.14 | 0.66 | 0.20 |
|                          | Sub-national                               | 466                                                      | 94                                      | 0.02  | -0.29 | 0.24 | 0.96           | 0.25 | 0.13 | 0.48 | 0.96 |
|                          | National                                   | 1785                                                     | 96                                      | -0.01 | -0.25 | 0.23 | 0.78           | 0.24 | 0.10 | 0.48 | 0.78 |
| Age band                 | 18-40                                      | 1287                                                     | 93                                      | -0.03 | -0.33 | 0.24 | 0.27           | 0.28 | 0.13 | 0.58 | 0.27 |
|                          | 40-60                                      | 1043                                                     | 97                                      | 0.02  | -0.21 | 0.23 | 0.98           | 0.22 | 0.11 | 0.43 | 0.98 |
|                          | 60 and above                               | 1200                                                     | 94                                      | -0.02 | -0.35 | 0.26 | 0.35           | 0.30 | 0.12 | 0.62 | 0.35 |
| Years                    | 1975-1984                                  | 136                                                      | 100                                     | -0.02 | -0.21 | 0.14 | 0.87           | 0.19 | 0.08 | 0.38 | 0.87 |
|                          | 1985-1994                                  | 569                                                      | 97                                      | -0.01 | -0.28 | 0.22 | 0.67           | 0.23 | 0.11 | 0.49 | 0.67 |
|                          | 1995-2004                                  | 1246                                                     | 94                                      | 0.01  | -0.28 | 0.26 | 0.69           | 0.27 | 0.12 | 0.54 | 0.69 |
|                          | 2005-2014                                  | 1579                                                     | 94                                      | -0.01 | -0.33 | 0.25 | 0.38           | 0.28 | 0.13 | 0.58 | 0.38 |
| Data density             | Data poor                                  | <i>Not applicable for male data in source-based test</i> |                                         |       |       |      |                |      |      |      |      |
|                          | Average data density                       | 460                                                      | 95                                      | -0.03 | -0.37 | 0.34 | 0.80           | 0.36 | 0.17 | 0.69 | 0.80 |
|                          | Data rich                                  | 3070                                                     | 95                                      | -0.01 | -0.28 | 0.24 | 0.37           | 0.26 | 0.11 | 0.51 | 0.37 |
| Hold out pattern         | Post-2000 data removed                     | 1183                                                     | 95                                      | -0.02 | -0.29 | 0.24 | 0.55           | 0.27 | 0.11 | 0.54 | 0.55 |
|                          | Random set of data removed                 | 2347                                                     | 94                                      | 0.00  | -0.30 | 0.24 | 0.44           | 0.27 | 0.12 | 0.53 | 0.44 |

<sup>†</sup> Estimated values minus held out values.

\* p-values for model error comparisons were calculated using the non-parametric Wilcoxon signed-rank test for paired data. The p-values are calculated assuming independence of the held-out observations. They should therefore be interpreted as an approximation because there is some dependence among the held-out observations, within each of the five repetitions for example.

**Test 2: Men, BMI < 18.5 kg/m<sup>2</sup>**

| Data                     | No. of held out observations               | Percent covered                                          | Error (percentage points) <sup>†</sup> |       |       |      | Absolute error |      |      |       |      |
|--------------------------|--------------------------------------------|----------------------------------------------------------|----------------------------------------|-------|-------|------|----------------|------|------|-------|------|
|                          |                                            |                                                          | Median                                 | Q1    | Q3    | (p*) | Median         | Q1   | Q3   | (p*)  |      |
| All                      | 3530                                       | 81                                                       | -0.10                                  | -1.36 | 0.67  | 0.09 | 1.02           | 0.32 | 3.34 | 0.09  |      |
| Super-region             | Central and Eastern Europe                 | 292                                                      | 70                                     | -0.24 | -1.23 | 0.27 | 0.66           | 0.61 | 0.26 | 1.54  | 0.66 |
|                          | Central Asia, Middle East and North Africa | 322                                                      | 83                                     | 0.01  | -1.28 | 0.90 | 0.22           | 1.14 | 0.48 | 2.64  | 0.22 |
|                          | East and South East Asia                   | 376                                                      | 98                                     | -1.11 | -4.09 | 1.42 | 0.34           | 3.08 | 1.19 | 5.35  | 0.34 |
|                          | High-income Asia Pacific                   | 354                                                      | 96                                     | -0.30 | -2.17 | 1.35 | 0.42           | 1.69 | 0.80 | 3.62  | 0.42 |
|                          | High-income Western countries              | 1140                                                     | 71                                     | -0.10 | -0.63 | 0.21 | 0.80           | 0.38 | 0.17 | 0.86  | 0.80 |
|                          | Latin America and Caribbean                | 426                                                      | 80                                     | -0.05 | -1.39 | 0.69 | 0.96           | 0.99 | 0.36 | 2.74  | 0.96 |
|                          | Oceania                                    | 133                                                      | 44                                     | 0.04  | -1.94 | 0.45 | 0.00           | 0.86 | 0.21 | 3.26  | 0.00 |
|                          | South Asia                                 | 210                                                      | 98                                     | 0.57  | -8.79 | 9.07 | 0.45           | 8.87 | 4.58 | 14.81 | 0.45 |
| Sub-Saharan Africa       | 277                                        | 97                                                       | 1.50                                   | -2.39 | 5.19  | 0.00 | 3.88           | 1.73 | 7.91 | 0.00  |      |
| Urban or rural studies   | Rural                                      | 455                                                      | 71                                     | -0.11 | -4.55 | 0.84 | 0.06           | 1.77 | 0.44 | 5.65  | 0.06 |
|                          | Urban                                      | 822                                                      | 75                                     | -0.16 | -1.20 | 0.50 | 0.88           | 0.80 | 0.31 | 2.77  | 0.88 |
|                          | Both rural and urban                       | 2253                                                     | 85                                     | -0.08 | -1.21 | 0.77 | 0.28           | 0.99 | 0.31 | 3.06  | 0.28 |
| Study representativeness | Community                                  | 1279                                                     | 72                                     | -0.15 | -1.66 | 0.53 | 0.03           | 0.98 | 0.34 | 3.51  | 0.03 |
|                          | Sub-national                               | 466                                                      | 78                                     | 0.01  | -1.09 | 0.70 | 0.61           | 0.85 | 0.24 | 3.92  | 0.61 |
|                          | National                                   | 1785                                                     | 88                                     | -0.11 | -1.30 | 0.83 | 0.32           | 1.07 | 0.35 | 3.04  | 0.32 |
| Age band                 | 18-40                                      | 1287                                                     | 84                                     | -0.22 | -2.09 | 1.02 | 0.47           | 1.56 | 0.56 | 4.21  | 0.47 |
|                          | 40-60                                      | 1043                                                     | 79                                     | -0.07 | -0.82 | 0.35 | 0.84           | 0.61 | 0.20 | 1.93  | 0.84 |
|                          | 60 and above                               | 1200                                                     | 80                                     | -0.06 | -1.40 | 0.62 | 0.25           | 0.95 | 0.29 | 3.21  | 0.25 |
| Years                    | 1975-1984                                  | 136                                                      | 88                                     | -0.17 | -1.02 | 0.52 | 0.11           | 0.84 | 0.36 | 1.81  | 0.11 |
|                          | 1985-1994                                  | 569                                                      | 75                                     | 0.05  | -1.10 | 0.63 | 0.14           | 0.82 | 0.32 | 2.39  | 0.14 |
|                          | 1995-2004                                  | 1246                                                     | 84                                     | -0.21 | -1.33 | 0.46 | 0.70           | 0.90 | 0.30 | 2.87  | 0.70 |
|                          | 2005-2014                                  | 1579                                                     | 80                                     | -0.06 | -1.54 | 0.91 | 0.03           | 1.26 | 0.34 | 4.03  | 0.03 |
| Data density             | Data poor                                  | <i>Not applicable for male data in source-based test</i> |                                        |       |       |      |                |      |      |       |      |
|                          | Average data density                       | 460                                                      | 81                                     | 0.20  | -1.31 | 2.73 | 0.02           | 2.00 | 0.67 | 5.64  | 0.02 |
|                          | Data rich                                  | 3070                                                     | 81                                     | -0.14 | -1.37 | 0.53 | 0.38           | 0.91 | 0.30 | 3.03  | 0.38 |
| Hold out pattern         | Post-2000 data removed                     | 1183                                                     | 80                                     | -0.06 | -1.18 | 0.89 | 0.07           | 1.03 | 0.34 | 2.82  | 0.07 |
|                          | Random set of data removed                 | 2347                                                     | 81                                     | -0.13 | -1.47 | 0.56 | 0.55           | 1.01 | 0.31 | 3.55  | 0.55 |

<sup>†</sup> Estimated values minus held out values.

\* p-values for model error comparisons were calculated using the non-parametric Wilcoxon signed-rank test for paired data. The p-values are calculated assuming independence of the held-out observations. They should therefore be interpreted as an approximation because there is some dependence among the held-out observations, within each of the five repetitions for example.



## Test 2: Men, BMI 18.5 to <20 kg/m<sup>2</sup>

| Data                     | No. of held out observations               | Percent covered                                          | Error (percentage points) <sup>†</sup> |       |       |      | Absolute error |      |      |      |      |
|--------------------------|--------------------------------------------|----------------------------------------------------------|----------------------------------------|-------|-------|------|----------------|------|------|------|------|
|                          |                                            |                                                          | Median                                 | Q1    | Q3    | (p*) | Median         | Q1   | Q3   | (p*) |      |
| All                      | 3530                                       | 90                                                       | -0.24                                  | -2.04 | 1.06  | 0.90 | 1.52           | 0.61 | 3.65 | 0.90 |      |
| Super-region             | Central and Eastern Europe                 | 292                                                      | 88                                     | -0.22 | -1.64 | 0.83 | 0.59           | 1.18 | 0.57 | 2.42 | 0.59 |
|                          | Central Asia, Middle East and North Africa | 322                                                      | 89                                     | -0.28 | -2.00 | 1.39 | 0.93           | 1.77 | 0.73 | 3.26 | 0.93 |
|                          | East and South East Asia                   | 376                                                      | 100                                    | -1.60 | -4.47 | 1.51 | 0.04           | 3.31 | 1.59 | 5.56 | 0.04 |
|                          | High-income Asia Pacific                   | 354                                                      | 97                                     | -0.13 | -2.61 | 1.58 | 0.54           | 1.97 | 0.80 | 4.61 | 0.54 |
|                          | High-income Western countries              | 1140                                                     | 85                                     | -0.21 | -1.02 | 0.58 | 0.39           | 0.82 | 0.37 | 1.60 | 0.39 |
|                          | Latin America and Caribbean                | 426                                                      | 88                                     | -0.11 | -2.31 | 1.21 | 0.99           | 1.68 | 0.69 | 3.14 | 0.99 |
|                          | Oceania                                    | 133                                                      | 56                                     | 0.19  | -1.08 | 1.05 | 0.01           | 1.06 | 0.36 | 3.35 | 0.01 |
|                          | South Asia                                 | 210                                                      | 99                                     | -1.11 | -5.52 | 2.51 | 0.05           | 4.18 | 1.78 | 6.87 | 0.05 |
| Sub-Saharan Africa       | 277                                        | 99                                                       | 0.74                                   | -3.34 | 4.30  | 0.14 | 3.90           | 1.83 | 6.98 | 0.14 |      |
| Urban or rural studies   | Rural                                      | 455                                                      | 82                                     | -0.39 | -4.43 | 1.31 | 0.67           | 2.45 | 0.97 | 6.76 | 0.67 |
|                          | Urban                                      | 822                                                      | 87                                     | -0.39 | -1.97 | 0.94 | 0.39           | 1.48 | 0.63 | 3.22 | 0.39 |
|                          | Both rural and urban                       | 2253                                                     | 92                                     | -0.16 | -1.76 | 1.06 | 0.64           | 1.39 | 0.56 | 3.43 | 0.64 |
| Study representativeness | Community                                  | 1279                                                     | 85                                     | -0.30 | -2.35 | 1.13 | 0.74           | 1.68 | 0.75 | 3.99 | 0.74 |
|                          | Sub-national                               | 466                                                      | 90                                     | -0.16 | -1.96 | 0.86 | 1.00           | 1.21 | 0.49 | 3.90 | 1.00 |
|                          | National                                   | 1785                                                     | 93                                     | -0.21 | -1.88 | 1.06 | 0.81           | 1.46 | 0.57 | 3.45 | 0.81 |
| Age band                 | 18-40                                      | 1287                                                     | 92                                     | -0.39 | -2.91 | 1.69 | 0.97           | 2.21 | 0.92 | 5.30 | 0.97 |
|                          | 40-60                                      | 1043                                                     | 90                                     | -0.18 | -1.52 | 0.80 | 0.14           | 1.08 | 0.47 | 2.73 | 0.14 |
|                          | 60 and above                               | 1200                                                     | 86                                     | -0.21 | -1.79 | 0.94 | 0.75           | 1.27 | 0.50 | 3.02 | 0.75 |
| Years                    | 1975-1984                                  | 136                                                      | 90                                     | -0.08 | -1.20 | 1.10 | 0.56           | 1.18 | 0.45 | 2.68 | 0.56 |
|                          | 1985-1994                                  | 569                                                      | 88                                     | -0.14 | -1.48 | 1.00 | 0.95           | 1.25 | 0.53 | 3.08 | 0.95 |
|                          | 1995-2004                                  | 1246                                                     | 91                                     | -0.29 | -2.09 | 0.89 | 0.82           | 1.41 | 0.59 | 3.33 | 0.82 |
|                          | 2005-2014                                  | 1579                                                     | 89                                     | -0.24 | -2.35 | 1.27 | 0.66           | 1.78 | 0.67 | 4.21 | 0.66 |
| Data density             | Data poor                                  | <i>Not applicable for male data in source-based test</i> |                                        |       |       |      |                |      |      |      |      |
|                          | Average data density                       | 460                                                      | 88                                     | 0.27  | -2.43 | 2.76 | 0.25           | 2.55 | 0.89 | 5.59 | 0.25 |
|                          | Data rich                                  | 3070                                                     | 90                                     | -0.28 | -2.01 | 0.92 | 0.78           | 1.40 | 0.58 | 3.35 | 0.78 |
| Hold out pattern         | Post-2000 data removed                     | 1183                                                     | 89                                     | -0.02 | -1.77 | 1.55 | 0.09           | 1.65 | 0.63 | 3.36 | 0.09 |
|                          | Random set of data removed                 | 2347                                                     | 90                                     | -0.36 | -2.24 | 0.89 | 0.27           | 1.43 | 0.60 | 3.81 | 0.27 |

<sup>†</sup> Estimated values minus held out values.

\* p-values for model error comparisons were calculated using the non-parametric Wilcoxon signed-rank test for paired data. The p-values are calculated assuming independence of the held-out observations. They should therefore be interpreted as an approximation because there is some dependence among the held-out observations, within each of the five repetitions for example.

## Test 2: Men, BMI 20 to <25 kg/m<sup>2</sup>

| Data                     | No. of held out observations               | Percent covered                                          | Error (percentage points) <sup>†</sup> |       |       |       | Absolute error |      |       |       |      |
|--------------------------|--------------------------------------------|----------------------------------------------------------|----------------------------------------|-------|-------|-------|----------------|------|-------|-------|------|
|                          |                                            |                                                          | Median                                 | Q1    | Q3    | (p*)  | Median         | Q1   | Q3    | (p*)  |      |
| All                      | 3530                                       | 99                                                       | 1.38                                   | -3.51 | 7.10  | 0.00  | 5.25           | 2.33 | 10.16 | 0.00  |      |
| Super-region             | Central and Eastern Europe                 | 292                                                      | 100                                    | 0.41  | -4.18 | 6.41  | 0.15           | 5.34 | 2.17  | 9.31  | 0.15 |
|                          | Central Asia, Middle East and North Africa | 322                                                      | 98                                     | 2.22  | -4.32 | 7.96  | 0.03           | 5.86 | 2.98  | 11.68 | 0.03 |
|                          | East and South East Asia                   | 376                                                      | 100                                    | 1.96  | -2.89 | 8.46  | 0.00           | 5.10 | 2.53  | 9.60  | 0.00 |
|                          | High-income Asia Pacific                   | 354                                                      | 100                                    | -0.26 | -2.65 | 4.26  | 0.03           | 2.96 | 1.46  | 6.41  | 0.03 |
|                          | High-income Western countries              | 1140                                                     | 99                                     | 1.32  | -3.13 | 6.76  | 0.00           | 4.75 | 2.23  | 9.50  | 0.00 |
|                          | Latin America and Caribbean                | 426                                                      | 99                                     | 1.14  | -4.42 | 6.50  | 0.10           | 5.41 | 2.53  | 10.00 | 0.10 |
|                          | Oceania                                    | 133                                                      | 93                                     | 1.71  | -7.52 | 10.25 | 0.37           | 9.16 | 3.86  | 19.80 | 0.37 |
|                          | South Asia                                 | 210                                                      | 100                                    | 4.72  | -2.87 | 13.26 | 0.00           | 8.74 | 4.23  | 14.69 | 0.00 |
| Sub-Saharan Africa       | 277                                        | 99                                                       | 1.97                                   | -3.10 | 8.11  | 0.00  | 6.05           | 2.50 | 10.56 | 0.00  |      |
| Urban or rural studies   | Rural                                      | 455                                                      | 98                                     | 4.70  | -1.66 | 12.97 | 0.00           | 7.88 | 3.81  | 14.94 | 0.00 |
|                          | Urban                                      | 822                                                      | 99                                     | 0.06  | -5.33 | 6.08  | 0.10           | 5.80 | 2.62  | 10.33 | 0.10 |
|                          | Both rural and urban                       | 2253                                                     | 99                                     | 1.27  | -3.02 | 6.53  | 0.00           | 4.77 | 2.10  | 9.15  | 0.00 |
| Study representativeness | Community                                  | 1279                                                     | 99                                     | 1.72  | -3.90 | 9.06  | 0.00           | 6.25 | 2.78  | 11.92 | 0.00 |
|                          | Sub-national                               | 466                                                      | 99                                     | 1.25  | -4.25 | 6.68  | 0.54           | 5.74 | 2.71  | 10.31 | 0.54 |
|                          | National                                   | 1785                                                     | 99                                     | 1.25  | -2.91 | 6.25  | 0.00           | 4.69 | 2.01  | 8.84  | 0.00 |
| Age band                 | 18-40                                      | 1287                                                     | 99                                     | 2.57  | -2.29 | 8.74  | 0.00           | 5.64 | 2.40  | 11.38 | 0.00 |
|                          | 40-60                                      | 1043                                                     | 100                                    | -0.06 | -4.29 | 5.20  | 0.35           | 4.81 | 2.15  | 9.30  | 0.35 |
|                          | 60 and above                               | 1200                                                     | 99                                     | 1.30  | -3.85 | 7.06  | 0.00           | 5.37 | 2.35  | 10.01 | 0.00 |
| Years                    | 1975-1984                                  | 136                                                      | 99                                     | -0.76 | -3.62 | 4.67  | 0.66           | 4.00 | 1.52  | 8.99  | 0.66 |
|                          | 1985-1994                                  | 569                                                      | 99                                     | -0.07 | -3.90 | 5.91  | 0.12           | 4.73 | 2.11  | 9.60  | 0.12 |
|                          | 1995-2004                                  | 1246                                                     | 99                                     | 1.53  | -3.28 | 7.16  | 0.00           | 5.29 | 2.37  | 9.82  | 0.00 |
|                          | 2005-2014                                  | 1579                                                     | 99                                     | 1.86  | -3.17 | 7.78  | 0.00           | 5.54 | 2.48  | 10.69 | 0.00 |
| Data density             | Data poor                                  | <i>Not applicable for male data in source-based test</i> |                                        |       |       |       |                |      |       |       |      |
|                          | Average data density                       | 460                                                      | 98                                     | 1.38  | -6.41 | 7.78  | 0.21           | 7.24 | 3.11  | 12.22 | 0.21 |
|                          | Data rich                                  | 3070                                                     | 99                                     | 1.38  | -3.13 | 7.02  | 0.00           | 5.08 | 2.23  | 9.72  | 0.00 |
| Hold out pattern         | Post-2000 data removed                     | 1183                                                     | 99                                     | 1.30  | -2.91 | 7.25  | 0.00           | 5.12 | 2.03  | 9.75  | 0.00 |
|                          | Random set of data removed                 | 2347                                                     | 99                                     | 1.40  | -3.73 | 7.05  | 0.00           | 5.35 | 2.47  | 10.32 | 0.00 |

<sup>†</sup> Estimated values minus held out values.

\* p-values for model error comparisons were calculated using the non-parametric Wilcoxon signed-rank test for paired data. The p-values are calculated assuming independence of the held-out observations. They should therefore be interpreted as an approximation because there is some dependence among the held-out observations, within each of the five repetitions for example.

## Test 2: Men, BMI 25 to <30 kg/m<sup>2</sup>

| Data                     | No. of held out observations               | Percent covered                                          | Error (percentage points) <sup>†</sup> |       |       |       | Absolute error |      |      |       |      |
|--------------------------|--------------------------------------------|----------------------------------------------------------|----------------------------------------|-------|-------|-------|----------------|------|------|-------|------|
|                          |                                            |                                                          | Median                                 | Q1    | Q3    | (p*)  | Median         | Q1   | Q3   | (p*)  |      |
| All                      | 3530                                       | 98                                                       | 0.75                                   | -3.14 | 4.79  | 0.04  | 4.03           | 1.82 | 7.56 | 0.04  |      |
| Super-region             | Central and Eastern Europe                 | 292                                                      | 98                                     | 2.26  | -2.90 | 6.11  | 0.53           | 5.02 | 2.61 | 8.14  | 0.53 |
|                          | Central Asia, Middle East and North Africa | 322                                                      | 98                                     | 0.42  | -4.20 | 5.65  | 0.36           | 4.86 | 2.42 | 9.13  | 0.36 |
|                          | East and South East Asia                   | 376                                                      | 98                                     | 0.72  | -3.40 | 4.61  | 0.34           | 3.81 | 1.76 | 7.08  | 0.34 |
|                          | High-income Asia Pacific                   | 354                                                      | 98                                     | 0.49  | -1.86 | 4.16  | 0.12           | 2.88 | 1.17 | 5.80  | 0.12 |
|                          | High-income Western countries              | 1140                                                     | 99                                     | 0.56  | -2.55 | 3.88  | 0.07           | 3.23 | 1.57 | 6.23  | 0.07 |
|                          | Latin America and Caribbean                | 426                                                      | 98                                     | 0.79  | -3.95 | 5.47  | 0.48           | 4.66 | 2.41 | 8.35  | 0.48 |
|                          | Oceania                                    | 133                                                      | 92                                     | 4.66  | -3.02 | 12.46 | 0.00           | 8.97 | 4.10 | 17.25 | 0.00 |
|                          | South Asia                                 | 210                                                      | 95                                     | 1.10  | -4.57 | 5.33  | 0.35           | 5.04 | 2.33 | 8.58  | 0.35 |
| Sub-Saharan Africa       | 277                                        | 96                                                       | -0.26                                  | -5.95 | 4.03  | 0.57  | 5.15           | 2.40 | 8.19 | 0.57  |      |
| Urban or rural studies   | Rural                                      | 455                                                      | 93                                     | 1.69  | -3.47 | 6.88  | 0.07           | 5.54 | 2.51 | 10.03 | 0.07 |
|                          | Urban                                      | 822                                                      | 98                                     | 1.37  | -3.95 | 6.30  | 0.24           | 5.09 | 2.45 | 9.05  | 0.24 |
|                          | Both rural and urban                       | 2253                                                     | 99                                     | 0.45  | -2.91 | 4.01  | 0.19           | 3.56 | 1.62 | 6.48  | 0.19 |
| Study representativeness | Community                                  | 1279                                                     | 97                                     | 1.40  | -3.52 | 6.41  | 0.08           | 5.12 | 2.42 | 9.35  | 0.08 |
|                          | Sub-national                               | 466                                                      | 99                                     | 0.79  | -3.78 | 5.64  | 0.49           | 4.48 | 2.04 | 8.25  | 0.49 |
|                          | National                                   | 1785                                                     | 98                                     | 0.41  | -2.81 | 3.79  | 0.31           | 3.40 | 1.54 | 6.17  | 0.31 |
| Age band                 | 18-40                                      | 1287                                                     | 96                                     | 0.15  | -3.69 | 3.95  | 0.50           | 3.82 | 1.80 | 7.42  | 0.50 |
|                          | 40-60                                      | 1043                                                     | 100                                    | 1.00  | -2.71 | 5.24  | 0.05           | 4.10 | 1.73 | 7.36  | 0.05 |
|                          | 60 and above                               | 1200                                                     | 98                                     | 1.15  | -2.79 | 5.52  | 0.34           | 4.15 | 1.90 | 7.89  | 0.34 |
| Years                    | 1975-1984                                  | 136                                                      | 98                                     | 0.64  | -2.16 | 4.77  | 0.21           | 2.91 | 1.39 | 6.40  | 0.21 |
|                          | 1985-1994                                  | 569                                                      | 97                                     | 1.18  | -2.67 | 5.40  | 0.15           | 4.20 | 1.89 | 7.60  | 0.15 |
|                          | 1995-2004                                  | 1246                                                     | 98                                     | 0.85  | -2.92 | 5.16  | 0.16           | 3.86 | 1.73 | 7.48  | 0.16 |
|                          | 2005-2014                                  | 1579                                                     | 98                                     | 0.51  | -3.82 | 4.37  | 0.57           | 4.13 | 1.93 | 7.65  | 0.57 |
| Data density             | Data poor                                  | <i>Not applicable for male data in source-based test</i> |                                        |       |       |       |                |      |      |       |      |
|                          | Average data density                       | 460                                                      | 96                                     | 0.40  | -5.75 | 6.12  | 0.33           | 5.83 | 2.89 | 9.93  | 0.33 |
|                          | Data rich                                  | 3070                                                     | 98                                     | 0.81  | -2.80 | 4.69  | 0.05           | 3.83 | 1.72 | 7.13  | 0.05 |
| Hold out pattern         | Post-2000 data removed                     | 1183                                                     | 98                                     | 0.45  | -2.94 | 4.34  | 0.29           | 3.83 | 1.71 | 7.22  | 0.29 |
|                          | Random set of data removed                 | 2347                                                     | 98                                     | 0.89  | -3.23 | 5.04  | 0.07           | 4.16 | 1.87 | 7.63  | 0.07 |

<sup>†</sup> Estimated values minus held out values.

\* p-values for model error comparisons were calculated using the non-parametric Wilcoxon signed-rank test for paired data. The p-values are calculated assuming independence of the held-out observations. They should therefore be interpreted as an approximation because there is some dependence among the held-out observations, within each of the five repetitions for example.

## Test 2: Men, BMI 30 to <35 kg/m<sup>2</sup>

| Data                     | No. of held out observations               | Percent covered                                          | Error (percentage points) <sup>†</sup> |       |       |      | Absolute error |      |      |       |      |
|--------------------------|--------------------------------------------|----------------------------------------------------------|----------------------------------------|-------|-------|------|----------------|------|------|-------|------|
|                          |                                            |                                                          | Median                                 | Q1    | Q3    | (p*) | Median         | Q1   | Q3   | (p*)  |      |
| All                      | 3530                                       | 91                                                       | 0.06                                   | -2.61 | 1.73  | 0.96 | 2.11           | 0.81 | 4.72 | 0.96  |      |
| Super-region             | Central and Eastern Europe                 | 292                                                      | 93                                     | 0.55  | -3.09 | 2.49 | 0.78           | 2.55 | 1.23 | 5.07  | 0.78 |
|                          | Central Asia, Middle East and North Africa | 322                                                      | 95                                     | -0.31 | -4.76 | 3.10 | 0.41           | 3.84 | 1.60 | 7.28  | 0.41 |
|                          | East and South East Asia                   | 376                                                      | 89                                     | 0.29  | -0.62 | 1.18 | 0.11           | 1.00 | 0.38 | 2.71  | 0.11 |
|                          | High-income Asia Pacific                   | 354                                                      | 76                                     | 0.02  | -0.95 | 0.57 | 0.36           | 0.74 | 0.35 | 1.42  | 0.36 |
|                          | High-income Western countries              | 1140                                                     | 96                                     | -0.23 | -3.34 | 2.41 | 0.08           | 2.80 | 1.19 | 5.34  | 0.08 |
|                          | Latin America and Caribbean                | 426                                                      | 95                                     | 0.40  | -3.02 | 2.92 | 0.81           | 2.95 | 1.34 | 5.21  | 0.81 |
|                          | Oceania                                    | 133                                                      | 83                                     | 1.38  | -6.33 | 8.31 | 0.44           | 6.86 | 3.68 | 11.18 | 0.44 |
|                          | South Asia                                 | 210                                                      | 85                                     | 0.07  | -1.42 | 0.62 | 0.71           | 0.88 | 0.34 | 1.82  | 0.71 |
| Sub-Saharan Africa       | 277                                        | 86                                                       | -0.54                                  | -3.15 | 0.71  | 0.10 | 1.54           | 0.69 | 3.45 | 0.10  |      |
| Urban or rural studies   | Rural                                      | 455                                                      | 76                                     | 0.14  | -3.53 | 1.27 | 0.09           | 1.90 | 0.72 | 4.93  | 0.09 |
|                          | Urban                                      | 822                                                      | 93                                     | 0.57  | -2.59 | 3.23 | 0.25           | 2.97 | 1.20 | 5.70  | 0.25 |
|                          | Both rural and urban                       | 2253                                                     | 93                                     | -0.09 | -2.46 | 1.40 | 0.34           | 1.90 | 0.71 | 4.31  | 0.34 |
| Study representativeness | Community                                  | 1279                                                     | 88                                     | 0.13  | -3.67 | 1.91 | 0.30           | 2.66 | 1.00 | 5.78  | 0.30 |
|                          | Sub-national                               | 466                                                      | 94                                     | 0.04  | -2.74 | 2.19 | 0.22           | 2.50 | 1.03 | 4.82  | 0.22 |
|                          | National                                   | 1785                                                     | 92                                     | 0.04  | -2.00 | 1.43 | 0.86           | 1.68 | 0.63 | 4.03  | 0.86 |
| Age band                 | 18-40                                      | 1287                                                     | 86                                     | -0.17 | -2.18 | 1.16 | 0.26           | 1.63 | 0.65 | 3.65  | 0.26 |
|                          | 40-60                                      | 1043                                                     | 97                                     | 0.40  | -2.85 | 2.46 | 0.54           | 2.63 | 1.11 | 5.56  | 0.54 |
|                          | 60 and above                               | 1200                                                     | 92                                     | 0.09  | -2.98 | 1.92 | 0.89           | 2.42 | 0.73 | 5.38  | 0.89 |
| Years                    | 1975-1984                                  | 136                                                      | 88                                     | 0.09  | -1.27 | 1.67 | 0.68           | 1.52 | 0.33 | 4.95  | 0.68 |
|                          | 1985-1994                                  | 569                                                      | 87                                     | 0.08  | -1.76 | 1.48 | 0.53           | 1.69 | 0.57 | 3.97  | 0.53 |
|                          | 1995-2004                                  | 1246                                                     | 93                                     | -0.02 | -2.42 | 1.67 | 0.66           | 2.05 | 0.80 | 4.49  | 0.66 |
|                          | 2005-2014                                  | 1579                                                     | 91                                     | 0.09  | -3.04 | 1.87 | 0.78           | 2.36 | 0.95 | 5.07  | 0.78 |
| Data density             | Data poor                                  | <i>Not applicable for male data in source-based test</i> |                                        |       |       |      |                |      |      |       |      |
|                          | Average data density                       | 460                                                      | 87                                     | 0.19  | -3.34 | 2.49 | 0.30           | 2.90 | 1.09 | 6.43  | 0.30 |
|                          | Data rich                                  | 3070                                                     | 92                                     | 0.04  | -2.48 | 1.63 | 0.60           | 2.04 | 0.77 | 4.53  | 0.60 |
| Hold out pattern         | Post-2000 data removed                     | 1183                                                     | 89                                     | -0.28 | -3.34 | 1.32 | 0.19           | 2.14 | 0.76 | 5.00  | 0.19 |
|                          | Random set of data removed                 | 2347                                                     | 92                                     | 0.16  | -2.25 | 1.95 | 0.34           | 2.10 | 0.82 | 4.62  | 0.34 |

<sup>†</sup> Estimated values minus held out values.

\* p-values for model error comparisons were calculated using the non-parametric Wilcoxon signed-rank test for paired data. The p-values are calculated assuming independence of the held-out observations. They should therefore be interpreted as an approximation because there is some dependence among the held-out observations, within each of the five repetitions for example.

## Test 2: Men, BMI 35 to <40 kg/m<sup>2</sup>

| Data                     | No. of held out observations               | Percent covered                                          | Error (percentage points) <sup>†</sup> |       |       |      | Absolute error |      |      |      |      |
|--------------------------|--------------------------------------------|----------------------------------------------------------|----------------------------------------|-------|-------|------|----------------|------|------|------|------|
|                          |                                            |                                                          | Median                                 | Q1    | Q3    | (p*) | Median         | Q1   | Q3   | (p*) |      |
| All                      | 3530                                       | 75                                                       | -0.02                                  | -0.77 | 0.32  | 0.01 | 0.51           | 0.14 | 1.36 | 0.01 |      |
| Super-region             | Central and Eastern Europe                 | 292                                                      | 80                                     | -0.03 | -0.98 | 0.53 | 0.51           | 0.72 | 0.32 | 1.53 | 0.51 |
|                          | Central Asia, Middle East and North Africa | 322                                                      | 86                                     | -0.03 | -1.22 | 0.85 | 0.86           | 0.98 | 0.43 | 1.93 | 0.86 |
|                          | East and South East Asia                   | 376                                                      | 71                                     | 0.00  | -0.17 | 0.05 | 0.97           | 0.10 | 0.03 | 0.29 | 0.97 |
|                          | High-income Asia Pacific                   | 354                                                      | 43                                     | 0.00  | -0.18 | 0.01 | 0.00           | 0.03 | 0.01 | 0.20 | 0.00 |
|                          | High-income Western countries              | 1140                                                     | 83                                     | -0.15 | -1.07 | 0.61 | 0.10           | 0.86 | 0.39 | 1.61 | 0.10 |
|                          | Latin America and Caribbean                | 426                                                      | 84                                     | 0.05  | -0.92 | 0.55 | 0.82           | 0.66 | 0.26 | 1.51 | 0.82 |
|                          | Oceania                                    | 133                                                      | 69                                     | 0.67  | -3.73 | 3.02 | 0.09           | 3.20 | 1.64 | 6.60 | 0.09 |
|                          | South Asia                                 | 210                                                      | 64                                     | -0.03 | -0.39 | 0.03 | 0.40           | 0.11 | 0.03 | 0.41 | 0.40 |
| Sub-Saharan Africa       | 277                                        | 72                                                       | -0.12                                  | -0.78 | 0.06  | 0.07 | 0.23           | 0.08 | 0.87 | 0.07 |      |
| Urban or rural studies   | Rural                                      | 455                                                      | 55                                     | 0.00  | -0.52 | 0.18 | 0.00           | 0.29 | 0.05 | 1.20 | 0.00 |
|                          | Urban                                      | 822                                                      | 78                                     | -0.03 | -0.87 | 0.54 | 0.52           | 0.68 | 0.20 | 1.43 | 0.52 |
|                          | Both rural and urban                       | 2253                                                     | 79                                     | -0.05 | -0.75 | 0.29 | 0.26           | 0.50 | 0.15 | 1.36 | 0.26 |
| Study representativeness | Community                                  | 1279                                                     | 71                                     | -0.04 | -0.99 | 0.28 | 0.18           | 0.60 | 0.15 | 1.41 | 0.18 |
|                          | Sub-national                               | 466                                                      | 82                                     | 0.02  | -0.64 | 0.54 | 0.04           | 0.58 | 0.21 | 1.41 | 0.04 |
|                          | National                                   | 1785                                                     | 77                                     | -0.02 | -0.65 | 0.29 | 0.13           | 0.45 | 0.12 | 1.30 | 0.13 |
| Age band                 | 18-40                                      | 1287                                                     | 68                                     | -0.01 | -0.63 | 0.24 | 0.01           | 0.38 | 0.12 | 1.04 | 0.01 |
|                          | 40-60                                      | 1043                                                     | 87                                     | -0.03 | -0.75 | 0.59 | 0.58           | 0.65 | 0.19 | 1.63 | 0.58 |
|                          | 60 and above                               | 1200                                                     | 74                                     | -0.02 | -0.92 | 0.29 | 0.04           | 0.58 | 0.13 | 1.46 | 0.04 |
| Years                    | 1975-1984                                  | 136                                                      | 68                                     | -0.07 | -0.69 | 0.01 | 0.96           | 0.44 | 0.02 | 1.12 | 0.96 |
|                          | 1985-1994                                  | 569                                                      | 66                                     | -0.02 | -0.58 | 0.16 | 0.02           | 0.34 | 0.08 | 0.99 | 0.02 |
|                          | 1995-2004                                  | 1246                                                     | 80                                     | -0.06 | -0.72 | 0.27 | 0.75           | 0.49 | 0.14 | 1.26 | 0.75 |
|                          | 2005-2014                                  | 1579                                                     | 76                                     | 0.01  | -0.89 | 0.46 | 0.03           | 0.63 | 0.19 | 1.68 | 0.03 |
| Data density             | Data poor                                  | <i>Not applicable for male data in source-based test</i> |                                        |       |       |      |                |      |      |      |      |
|                          | Average data density                       | 460                                                      | 73                                     | -0.01 | -0.88 | 0.37 | 0.10           | 0.63 | 0.17 | 1.87 | 0.10 |
|                          | Data rich                                  | 3070                                                     | 76                                     | -0.02 | -0.75 | 0.31 | 0.03           | 0.51 | 0.14 | 1.31 | 0.03 |
| Hold out pattern         | Post-2000 data removed                     | 1183                                                     | 70                                     | -0.02 | -0.72 | 0.28 | 0.03           | 0.49 | 0.11 | 1.34 | 0.03 |
|                          | Random set of data removed                 | 2347                                                     | 78                                     | -0.02 | -0.80 | 0.34 | 0.05           | 0.54 | 0.15 | 1.37 | 0.05 |

<sup>†</sup> Estimated values minus held out values.

\* p-values for model error comparisons were calculated using the non-parametric Wilcoxon signed-rank test for paired data. The p-values are calculated assuming independence of the held-out observations. They should therefore be interpreted as an approximation because there is some dependence among the held-out observations, within each of the five repetitions for example.

**Test 2: Men, BMI  $\geq$  40 kg/m<sup>2</sup>**

| Data                     | No. of held out observations               | Percent covered                                          | Error (percentage points) <sup>†</sup> |       |       |      | Absolute error |      |      |      |      |
|--------------------------|--------------------------------------------|----------------------------------------------------------|----------------------------------------|-------|-------|------|----------------|------|------|------|------|
|                          |                                            |                                                          | Median                                 | Q1    | Q3    | (p*) | Median         | Q1   | Q3   | (p*) |      |
| All                      | 3530                                       | 59                                                       | 0.00                                   | -0.27 | 0.08  | 0.00 | 0.15           | 0.03 | 0.50 | 0.00 |      |
| Super-region             | Central and Eastern Europe                 | 292                                                      | 52                                     | 0.03  | -0.34 | 0.12 | 0.01           | 0.16 | 0.06 | 0.47 | 0.01 |
|                          | Central Asia, Middle East and North Africa | 322                                                      | 74                                     | 0.02  | -0.34 | 0.22 | 0.25           | 0.29 | 0.12 | 0.64 | 0.25 |
|                          | East and South East Asia                   | 376                                                      | 58                                     | 0.00  | -0.06 | 0.01 | 0.09           | 0.03 | 0.01 | 0.10 | 0.09 |
|                          | High-income Asia Pacific                   | 354                                                      | 19                                     | 0.00  | 0.00  | 0.00 | 0.00           | 0.00 | 0.00 | 0.02 | 0.00 |
|                          | High-income Western countries              | 1140                                                     | 66                                     | -0.02 | -0.41 | 0.12 | 0.68           | 0.24 | 0.08 | 0.63 | 0.68 |
|                          | Latin America and Caribbean                | 426                                                      | 70                                     | 0.02  | -0.34 | 0.21 | 0.09           | 0.25 | 0.09 | 0.56 | 0.09 |
|                          | Oceania                                    | 133                                                      | 61                                     | 0.29  | -2.46 | 1.08 | 0.06           | 1.43 | 0.61 | 3.08 | 0.06 |
|                          | South Asia                                 | 210                                                      | 47                                     | 0.00  | -0.13 | 0.02 | 0.00           | 0.04 | 0.01 | 0.13 | 0.00 |
| Sub-Saharan Africa       | 277                                        | 58                                                       | 0.00                                   | -0.32 | 0.05  | 0.07 | 0.15           | 0.04 | 0.43 | 0.07 |      |
| Urban or rural studies   | Rural                                      | 455                                                      | 37                                     | 0.01  | -0.03 | 0.07 | 0.00           | 0.05 | 0.01 | 0.24 | 0.00 |
|                          | Urban                                      | 822                                                      | 63                                     | -0.03 | -0.34 | 0.08 | 0.16           | 0.18 | 0.06 | 0.50 | 0.16 |
|                          | Both rural and urban                       | 2253                                                     | 62                                     | 0.00  | -0.29 | 0.09 | 0.00           | 0.17 | 0.03 | 0.53 | 0.00 |
| Study representativeness | Community                                  | 1279                                                     | 54                                     | 0.00  | -0.33 | 0.06 | 0.00           | 0.14 | 0.03 | 0.47 | 0.00 |
|                          | Sub-national                               | 466                                                      | 63                                     | 0.01  | -0.20 | 0.17 | 0.00           | 0.18 | 0.05 | 0.53 | 0.00 |
|                          | National                                   | 1785                                                     | 61                                     | 0.00  | -0.25 | 0.09 | 0.00           | 0.15 | 0.03 | 0.51 | 0.00 |
| Age band                 | 18-40                                      | 1287                                                     | 51                                     | 0.00  | -0.21 | 0.07 | 0.00           | 0.12 | 0.02 | 0.40 | 0.00 |
|                          | 40-60                                      | 1043                                                     | 72                                     | -0.01 | -0.35 | 0.15 | 0.09           | 0.25 | 0.06 | 0.65 | 0.09 |
|                          | 60 and above                               | 1200                                                     | 55                                     | 0.00  | -0.26 | 0.08 | 0.00           | 0.14 | 0.02 | 0.45 | 0.00 |
| Years                    | 1975-1984                                  | 136                                                      | 50                                     | 0.00  | -0.33 | 0.00 | 0.15           | 0.10 | 0.00 | 0.47 | 0.15 |
|                          | 1985-1994                                  | 569                                                      | 48                                     | 0.00  | -0.14 | 0.04 | 0.00           | 0.07 | 0.01 | 0.25 | 0.00 |
|                          | 1995-2004                                  | 1246                                                     | 64                                     | -0.01 | -0.25 | 0.05 | 0.00           | 0.13 | 0.03 | 0.39 | 0.00 |
|                          | 2005-2014                                  | 1579                                                     | 59                                     | 0.01  | -0.34 | 0.18 | 0.00           | 0.24 | 0.05 | 0.70 | 0.00 |
| Data density             | Data poor                                  | <i>Not applicable for male data in source-based test</i> |                                        |       |       |      |                |      |      |      |      |
|                          | Average data density                       | 460                                                      | 57                                     | 0.01  | -0.35 | 0.17 | 0.00           | 0.23 | 0.07 | 0.74 | 0.00 |
|                          | Data rich                                  | 3070                                                     | 59                                     | 0.00  | -0.26 | 0.07 | 0.00           | 0.14 | 0.03 | 0.47 | 0.00 |
| Hold out pattern         | Post-2000 data removed                     | 1183                                                     | 53                                     | 0.00  | -0.30 | 0.05 | 0.00           | 0.14 | 0.01 | 0.46 | 0.00 |
|                          | Random set of data removed                 | 2347                                                     | 62                                     | 0.00  | -0.26 | 0.09 | 0.00           | 0.16 | 0.04 | 0.52 | 0.00 |

<sup>†</sup> Estimated values minus held out values.

\* p-values for model error comparisons were calculated using the non-parametric Wilcoxon signed-rank test for paired data. The p-values are calculated assuming independence of the held-out observations. They should therefore be interpreted as an approximation because there is some dependence among the held-out observations, within each of the five repetitions for example.

## Test 2: Women, mean BMI

| Data                     | No. of held out observations               | Percent covered | Error (kg/m <sup>2</sup> ) <sup>†</sup> |       |       |      | Absolute error |      |      |      |      |
|--------------------------|--------------------------------------------|-----------------|-----------------------------------------|-------|-------|------|----------------|------|------|------|------|
|                          |                                            |                 | Median                                  | Q1    | Q3    | (p*) | Median         | Q1   | Q3   | (p*) |      |
| All                      | 4047                                       | 94              | -0.01                                   | -0.36 | 0.33  | 0.95 | 0.35           | 0.16 | 0.67 | 0.95 |      |
| Super-region             | Central and Eastern Europe                 | 207             | 97                                      | 0.01  | -0.44 | 0.41 | 0.83           | 0.43 | 0.15 | 0.70 | 0.83 |
|                          | Central Asia, Middle East and North Africa | 522             | 89                                      | -0.01 | -0.51 | 0.55 | 0.92           | 0.54 | 0.25 | 0.95 | 0.92 |
|                          | East and South East Asia                   | 499             | 94                                      | 0.00  | -0.27 | 0.33 | 0.90           | 0.31 | 0.14 | 0.57 | 0.90 |
|                          | High-income Asia Pacific                   | 239             | 94                                      | 0.03  | -0.40 | 0.30 | 0.60           | 0.32 | 0.16 | 0.58 | 0.60 |
|                          | High-income Western countries              | 1162            | 96                                      | -0.01 | -0.34 | 0.28 | 0.54           | 0.31 | 0.15 | 0.57 | 0.54 |
|                          | Latin America and Caribbean                | 523             | 96                                      | -0.05 | -0.40 | 0.30 | 0.82           | 0.35 | 0.14 | 0.78 | 0.82 |
|                          | Oceania                                    | 117             | 95                                      | -0.04 | -0.55 | 0.50 | 0.99           | 0.53 | 0.26 | 0.80 | 0.99 |
|                          | South Asia                                 | 225             | 93                                      | -0.02 | -0.23 | 0.26 | 0.97           | 0.25 | 0.12 | 0.48 | 0.97 |
| Sub-Saharan Africa       | 553                                        | 94              | -0.01                                   | -0.33 | 0.35  | 0.39 | 0.33           | 0.13 | 0.67 | 0.39 |      |
| Urban or rural studies   | Rural                                      | 381             | 91                                      | 0.04  | -0.40 | 0.46 | 0.97           | 0.43 | 0.18 | 0.92 | 0.97 |
|                          | Urban                                      | 981             | 95                                      | -0.01 | -0.38 | 0.37 | 0.66           | 0.38 | 0.17 | 0.74 | 0.66 |
|                          | Both rural and urban                       | 2685            | 94                                      | -0.02 | -0.35 | 0.31 | 0.93           | 0.33 | 0.15 | 0.62 | 0.93 |
| Study representativeness | Community                                  | 1292            | 93                                      | 0.00  | -0.43 | 0.38 | 0.68           | 0.40 | 0.18 | 0.83 | 0.68 |
|                          | Sub-national                               | 517             | 94                                      | -0.01 | -0.32 | 0.36 | 0.83           | 0.33 | 0.15 | 0.60 | 0.83 |
|                          | National                                   | 2238            | 95                                      | -0.02 | -0.34 | 0.31 | 0.82           | 0.32 | 0.15 | 0.61 | 0.82 |
| Age band                 | 18-40                                      | 1695            | 94                                      | 0.00  | -0.33 | 0.35 | 0.76           | 0.33 | 0.15 | 0.67 | 0.76 |
|                          | 40-60                                      | 1211            | 97                                      | -0.02 | -0.33 | 0.28 | 0.71           | 0.31 | 0.14 | 0.54 | 0.71 |
|                          | 60 and above                               | 1141            | 92                                      | -0.03 | -0.45 | 0.39 | 0.87           | 0.42 | 0.19 | 0.86 | 0.87 |
| Years                    | 1975-1984                                  | 166             | 94                                      | 0.01  | -0.35 | 0.36 | 0.97           | 0.36 | 0.14 | 0.64 | 0.97 |
|                          | 1985-1994                                  | 634             | 97                                      | -0.01 | -0.33 | 0.33 | 0.90           | 0.33 | 0.15 | 0.61 | 0.90 |
|                          | 1995-2004                                  | 1515            | 94                                      | -0.02 | -0.34 | 0.32 | 0.92           | 0.33 | 0.15 | 0.64 | 0.92 |
|                          | 2005-2014                                  | 1732            | 93                                      | -0.01 | -0.40 | 0.36 | 0.94           | 0.37 | 0.17 | 0.73 | 0.94 |
| Data density             | Data poor                                  | 116             | 97                                      | 0.02  | -0.59 | 0.46 | 0.94           | 0.52 | 0.21 | 1.05 | 0.94 |
|                          | Average data density                       | 723             | 95                                      | -0.01 | -0.35 | 0.39 | 0.75           | 0.36 | 0.17 | 0.72 | 0.75 |
|                          | Data rich                                  | 3208            | 94                                      | -0.01 | -0.36 | 0.32 | 0.83           | 0.34 | 0.15 | 0.65 | 0.83 |
| Hold out pattern         | Post-2000 data removed                     | 1406            | 95                                      | 0.00  | -0.34 | 0.31 | 0.93           | 0.32 | 0.15 | 0.60 | 0.93 |
|                          | Random set of data removed                 | 2641            | 94                                      | -0.02 | -0.37 | 0.36 | 0.92           | 0.36 | 0.16 | 0.72 | 0.92 |

<sup>†</sup> Estimated values minus held out values.

\* p-values for model error comparisons were calculated using the non-parametric Wilcoxon signed-rank test for paired data. The p-values are calculated assuming independence of the held-out observations. They should therefore be interpreted as an approximation because there is some dependence among the held-out observations, within each of the five repetitions for example.

## Test 2: Women, BMI < 18.5 kg/m<sup>2</sup>

| Data                     | No. of held out observations               | Percent covered | Error (percentage points) <sup>†</sup> |       |        |      | Absolute error |      |      |       |      |
|--------------------------|--------------------------------------------|-----------------|----------------------------------------|-------|--------|------|----------------|------|------|-------|------|
|                          |                                            |                 | Median                                 | Q1    | Q3     | (p*) | Median         | Q1   | Q3   | (p*)  |      |
| All                      | 4047                                       | 90              | -0.15                                  | -2.03 | 1.14   | 0.71 | 1.57           | 0.57 | 4.06 | 0.71  |      |
| Super-region             | Central and Eastern Europe                 | 207             | 88                                     | -0.25 | -1.71  | 0.38 | 0.98           | 0.85 | 0.31 | 2.32  | 0.98 |
|                          | Central Asia, Middle East and North Africa | 522             | 88                                     | 0.25  | -1.29  | 1.16 | 0.00           | 1.21 | 0.54 | 2.83  | 0.00 |
|                          | East and South East Asia                   | 499             | 98                                     | -0.15 | -4.43  | 3.76 | 0.27           | 4.06 | 1.92 | 6.69  | 0.27 |
|                          | High-income Asia Pacific                   | 239             | 100                                    | -0.48 | -5.77  | 1.95 | 0.01           | 2.87 | 1.36 | 6.66  | 0.01 |
|                          | High-income Western countries              | 1162            | 88                                     | -0.32 | -1.35  | 0.35 | 0.00           | 0.82 | 0.34 | 1.89  | 0.00 |
|                          | Latin America and Caribbean                | 523             | 86                                     | 0.10  | -1.09  | 0.89 | 0.44           | 0.98 | 0.46 | 2.02  | 0.44 |
|                          | Oceania                                    | 117             | 52                                     | 0.09  | -1.07  | 0.49 | 0.07           | 0.86 | 0.19 | 2.31  | 0.07 |
|                          | South Asia                                 | 225             | 96                                     | -4.31 | -16.58 | 5.02 | 0.00           | 9.39 | 4.86 | 17.62 | 0.00 |
| Sub-Saharan Africa       | 553                                        | 98              | 0.70                                   | -2.46 | 3.69   | 0.00 | 3.25           | 1.55 | 6.16 | 0.00  |      |
| Urban or rural studies   | Rural                                      | 381             | 80                                     | -1.30 | -8.16  | 0.85 | 0.38           | 2.72 | 1.01 | 8.48  | 0.38 |
|                          | Urban                                      | 981             | 84                                     | -0.53 | -2.04  | 0.52 | 0.00           | 1.23 | 0.52 | 2.97  | 0.00 |
|                          | Both rural and urban                       | 2685            | 94                                     | 0.06  | -1.64  | 1.51 | 0.02           | 1.58 | 0.56 | 4.13  | 0.02 |
| Study representativeness | Community                                  | 1292            | 83                                     | -0.49 | -2.43  | 0.85 | 0.53           | 1.66 | 0.63 | 4.09  | 0.53 |
|                          | Sub-national                               | 517             | 92                                     | -0.28 | -1.71  | 0.63 | 0.14           | 1.17 | 0.42 | 3.78  | 0.14 |
|                          | National                                   | 2238            | 94                                     | 0.04  | -1.77  | 1.43 | 0.10           | 1.60 | 0.57 | 4.15  | 0.10 |
| Age band                 | 18-40                                      | 1695            | 94                                     | -0.17 | -3.34  | 2.05 | 0.94           | 2.59 | 1.03 | 5.64  | 0.94 |
|                          | 40-60                                      | 1211            | 89                                     | -0.22 | -1.37  | 0.53 | 0.02           | 0.91 | 0.34 | 2.59  | 0.02 |
|                          | 60 and above                               | 1141            | 87                                     | -0.01 | -1.41  | 0.99 | 0.52           | 1.20 | 0.49 | 3.30  | 0.52 |
| Years                    | 1975-1984                                  | 166             | 86                                     | -1.01 | -3.18  | 0.09 | 0.00           | 1.51 | 0.55 | 3.79  | 0.00 |
|                          | 1985-1994                                  | 634             | 87                                     | -0.14 | -1.87  | 1.07 | 0.54           | 1.45 | 0.54 | 3.71  | 0.54 |
|                          | 1995-2004                                  | 1515            | 93                                     | -0.14 | -1.95  | 1.10 | 0.52           | 1.44 | 0.53 | 4.12  | 0.52 |
|                          | 2005-2014                                  | 1732            | 90                                     | -0.06 | -2.02  | 1.38 | 0.31           | 1.70 | 0.62 | 4.23  | 0.31 |
| Data density             | Data poor                                  | 116             | 94                                     | -0.14 | -2.41  | 1.50 | 0.73           | 2.06 | 0.85 | 4.52  | 0.73 |
|                          | Average data density                       | 723             | 89                                     | 0.10  | -1.67  | 1.71 | 0.36           | 1.70 | 0.63 | 4.30  | 0.36 |
|                          | Data rich                                  | 3208            | 91                                     | -0.21 | -2.09  | 1.03 | 0.93           | 1.50 | 0.55 | 3.96  | 0.93 |
| Hold out pattern         | Post-2000 data removed                     | 1406            | 94                                     | -0.27 | -2.29  | 1.17 | 0.26           | 1.74 | 0.66 | 4.06  | 0.26 |
|                          | Random set of data removed                 | 2641            | 89                                     | -0.09 | -1.86  | 1.13 | 0.22           | 1.48 | 0.53 | 4.06  | 0.22 |

<sup>†</sup> Estimated values minus held out values.

\* p-values for model error comparisons were calculated using the non-parametric Wilcoxon signed-rank test for paired data. The p-values are calculated assuming independence of the held-out observations. They should therefore be interpreted as an approximation because there is some dependence among the held-out observations, within each of the five repetitions for example.



## Test 2: Women, BMI 18.5 to <20 kg/m<sup>2</sup>

| Data                     | No. of held out observations               | Percent covered | Error (percentage points) <sup>†</sup> |       |       |      | Absolute error |      |      |      |      |
|--------------------------|--------------------------------------------|-----------------|----------------------------------------|-------|-------|------|----------------|------|------|------|------|
|                          |                                            |                 | Median                                 | Q1    | Q3    | (p*) | Median         | Q1   | Q3   | (p*) |      |
| All                      | 4047                                       | 94              | -0.16                                  | -2.54 | 1.67  | 0.78 | 2.09           | 0.87 | 4.39 | 0.78 |      |
| Super-region             | Central and Eastern Europe                 | 207             | 99                                     | -0.05 | -2.14 | 0.94 | 0.22           | 1.45 | 0.56 | 3.50 | 0.22 |
|                          | Central Asia, Middle East and North Africa | 522             | 91                                     | 0.09  | -1.38 | 1.53 | 0.13           | 1.47 | 0.69 | 3.20 | 0.13 |
|                          | East and South East Asia                   | 499             | 99                                     | -0.15 | -4.21 | 3.22 | 0.73           | 3.79 | 1.82 | 6.44 | 0.73 |
|                          | High-income Asia Pacific                   | 239             | 100                                    | -0.66 | -5.70 | 1.69 | 0.20           | 3.13 | 1.34 | 6.29 | 0.20 |
|                          | High-income Western countries              | 1162            | 93                                     | -0.38 | -2.28 | 1.03 | 0.18           | 1.56 | 0.69 | 3.14 | 0.18 |
|                          | Latin America and Caribbean                | 523             | 92                                     | -0.13 | -1.64 | 1.36 | 0.77           | 1.48 | 0.61 | 2.65 | 0.77 |
|                          | Oceania                                    | 117             | 62                                     | 0.18  | -1.23 | 1.13 | 0.20           | 1.18 | 0.38 | 3.80 | 0.20 |
|                          | South Asia                                 | 225             | 98                                     | -1.55 | -5.04 | 3.23 | 0.16           | 4.28 | 2.29 | 6.54 | 0.16 |
| Sub-Saharan Africa       | 553                                        | 99              | 0.45                                   | -3.19 | 3.39  | 0.59 | 3.32           | 1.60 | 5.73 | 0.59 |      |
| Urban or rural studies   | Rural                                      | 381             | 87                                     | -1.55 | -5.43 | 1.32 | 0.04           | 3.15 | 1.41 | 6.57 | 0.04 |
|                          | Urban                                      | 981             | 91                                     | -0.56 | -2.67 | 1.12 | 0.05           | 1.91 | 0.82 | 3.82 | 0.05 |
|                          | Both rural and urban                       | 2685            | 96                                     | 0.09  | -2.14 | 1.96 | 0.23           | 2.06 | 0.84 | 4.32 | 0.23 |
| Study representativeness | Community                                  | 1292            | 90                                     | -0.33 | -2.87 | 1.59 | 0.67           | 2.24 | 0.97 | 4.72 | 0.67 |
|                          | Sub-national                               | 517             | 94                                     | -0.35 | -2.46 | 1.26 | 0.37           | 1.95 | 0.70 | 4.19 | 0.37 |
|                          | National                                   | 2238            | 96                                     | 0.04  | -2.29 | 1.77 | 0.80           | 2.06 | 0.87 | 4.32 | 0.80 |
| Age band                 | 18-40                                      | 1695            | 97                                     | -0.04 | -3.61 | 2.71 | 0.66           | 3.05 | 1.48 | 5.88 | 0.66 |
|                          | 40-60                                      | 1211            | 94                                     | -0.31 | -2.13 | 1.06 | 0.09           | 1.51 | 0.64 | 3.40 | 0.09 |
|                          | 60 and above                               | 1141            | 91                                     | -0.09 | -1.98 | 1.24 | 0.99           | 1.48 | 0.66 | 3.23 | 0.99 |
| Years                    | 1975-1984                                  | 166             | 91                                     | -0.81 | -2.78 | 0.98 | 0.11           | 2.23 | 0.97 | 3.81 | 0.11 |
|                          | 1985-1994                                  | 634             | 91                                     | -0.01 | -2.43 | 1.98 | 0.84           | 2.16 | 0.90 | 4.48 | 0.84 |
|                          | 1995-2004                                  | 1515            | 95                                     | -0.03 | -2.29 | 1.61 | 0.43           | 1.93 | 0.81 | 4.24 | 0.43 |
|                          | 2005-2014                                  | 1732            | 95                                     | -0.28 | -2.81 | 1.63 | 0.47           | 2.21 | 0.90 | 4.63 | 0.47 |
| Data density             | Data poor                                  | 116             | 93                                     | -0.40 | -3.11 | 1.12 | 0.77           | 2.14 | 0.89 | 4.24 | 0.77 |
|                          | Average data density                       | 723             | 94                                     | -0.02 | -2.30 | 1.97 | 0.66           | 2.13 | 0.87 | 4.65 | 0.66 |
|                          | Data rich                                  | 3208            | 94                                     | -0.19 | -2.60 | 1.60 | 0.99           | 2.08 | 0.87 | 4.37 | 0.99 |
| Hold out pattern         | Post-2000 data removed                     | 1406            | 96                                     | -0.31 | -2.82 | 1.68 | 0.23           | 2.24 | 0.99 | 4.41 | 0.23 |
|                          | Random set of data removed                 | 2641            | 93                                     | -0.08 | -2.37 | 1.67 | 0.47           | 2.05 | 0.81 | 4.37 | 0.47 |

<sup>†</sup> Estimated values minus held out values.

\* p-values for model error comparisons were calculated using the non-parametric Wilcoxon signed-rank test for paired data. The p-values are calculated assuming independence of the held-out observations. They should therefore be interpreted as an approximation because there is some dependence among the held-out observations, within each of the five repetitions for example.

## Test 2: Women, BMI 20 to <25 kg/m<sup>2</sup>

| Data                     | No. of held out observations               | Percent covered | Error (percentage points) <sup>†</sup> |       |       |       | Absolute error |      |       |       |      |
|--------------------------|--------------------------------------------|-----------------|----------------------------------------|-------|-------|-------|----------------|------|-------|-------|------|
|                          |                                            |                 | Median                                 | Q1    | Q3    | (p*)  | Median         | Q1   | Q3    | (p*)  |      |
| All                      | 4047                                       | 99              | 1.53                                   | -3.63 | 7.12  | 0.00  | 5.40           | 2.51 | 10.10 | 0.00  |      |
| Super-region             | Central and Eastern Europe                 | 207             | 100                                    | 3.45  | -2.84 | 7.98  | 0.01           | 6.35 | 3.21  | 9.03  | 0.01 |
|                          | Central Asia, Middle East and North Africa | 522             | 100                                    | 2.81  | -2.42 | 8.15  | 0.00           | 5.46 | 2.71  | 10.02 | 0.00 |
|                          | East and South East Asia                   | 499             | 99                                     | 1.43  | -3.26 | 6.59  | 0.00           | 4.95 | 2.24  | 9.28  | 0.00 |
|                          | High-income Asia Pacific                   | 239             | 100                                    | 0.10  | -3.05 | 8.69  | 0.00           | 4.54 | 2.24  | 9.61  | 0.00 |
|                          | High-income Western countries              | 1162            | 99                                     | 0.98  | -4.42 | 6.44  | 0.01           | 5.44 | 2.45  | 10.36 | 0.01 |
|                          | Latin America and Caribbean                | 523             | 99                                     | 0.77  | -3.37 | 5.65  | 0.22           | 4.46 | 1.83  | 8.54  | 0.22 |
|                          | Oceania                                    | 117             | 93                                     | 2.91  | -2.73 | 10.41 | 0.08           | 7.95 | 2.91  | 16.96 | 0.08 |
|                          | South Asia                                 | 225             | 97                                     | 5.81  | -0.81 | 14.31 | 0.00           | 8.09 | 4.09  | 17.13 | 0.00 |
| Sub-Saharan Africa       | 553                                        | 100             | -0.30                                  | -5.25 | 5.49  | 0.73  | 5.36           | 2.63 | 9.35  | 0.73  |      |
| Urban or rural studies   | Rural                                      | 381             | 96                                     | 4.86  | -2.37 | 12.67 | 0.00           | 8.26 | 3.85  | 15.62 | 0.00 |
|                          | Urban                                      | 981             | 99                                     | 0.36  | -5.32 | 5.78  | 0.55           | 5.61 | 2.62  | 10.54 | 0.55 |
|                          | Both rural and urban                       | 2685            | 100                                    | 1.60  | -3.30 | 6.98  | 0.00           | 5.09 | 2.35  | 9.32  | 0.00 |
| Study representativeness | Community                                  | 1292            | 98                                     | 2.25  | -3.90 | 8.84  | 0.00           | 6.35 | 2.89  | 12.27 | 0.00 |
|                          | Sub-national                               | 517             | 99                                     | 0.00  | -5.67 | 5.70  | 0.83           | 5.70 | 2.69  | 10.80 | 0.83 |
|                          | National                                   | 2238            | 100                                    | 1.52  | -3.18 | 6.62  | 0.00           | 4.91 | 2.26  | 8.80  | 0.00 |
| Age band                 | 18-40                                      | 1695            | 99                                     | 1.92  | -3.47 | 8.30  | 0.00           | 5.80 | 2.63  | 10.63 | 0.00 |
|                          | 40-60                                      | 1211            | 100                                    | 1.39  | -3.52 | 5.95  | 0.06           | 4.81 | 2.29  | 9.04  | 0.06 |
|                          | 60 and above                               | 1141            | 98                                     | 1.25  | -3.90 | 6.96  | 0.00           | 5.38 | 2.57  | 10.15 | 0.00 |
| Years                    | 1975-1984                                  | 166             | 99                                     | 2.29  | -5.47 | 8.12  | 0.28           | 6.82 | 3.63  | 10.92 | 0.28 |
|                          | 1985-1994                                  | 634             | 99                                     | 0.68  | -4.76 | 6.65  | 0.35           | 5.78 | 2.90  | 10.79 | 0.35 |
|                          | 1995-2004                                  | 1515            | 99                                     | 2.05  | -2.60 | 7.48  | 0.00           | 5.19 | 2.30  | 9.82  | 0.00 |
|                          | 2005-2014                                  | 1732            | 99                                     | 1.17  | -3.97 | 6.79  | 0.00           | 5.30 | 2.53  | 9.93  | 0.00 |
| Data density             | Data poor                                  | 116             | 100                                    | 0.94  | -5.28 | 5.21  | 0.92           | 5.29 | 2.31  | 9.65  | 0.92 |
|                          | Average data density                       | 723             | 99                                     | 1.15  | -4.79 | 6.61  | 0.34           | 5.52 | 2.65  | 9.66  | 0.34 |
|                          | Data rich                                  | 3208            | 99                                     | 1.63  | -3.42 | 7.36  | 0.00           | 5.38 | 2.49  | 10.16 | 0.00 |
| Hold out pattern         | Post-2000 data removed                     | 1406            | 99                                     | 1.07  | -3.56 | 6.46  | 0.00           | 5.01 | 2.31  | 9.65  | 0.00 |
|                          | Random set of data removed                 | 2641            | 99                                     | 1.74  | -3.68 | 7.32  | 0.00           | 5.62 | 2.61  | 10.30 | 0.00 |

<sup>†</sup> Estimated values minus held out values.

\* p-values for model error comparisons were calculated using the non-parametric Wilcoxon signed-rank test for paired data. The p-values are calculated assuming independence of the held-out observations. They should therefore be interpreted as an approximation because there is some dependence among the held-out observations, within each of the five repetitions for example.

## Test 2: Women, BMI 25 to <30 kg/m<sup>2</sup>

| Data                     | No. of held out observations               | Percent covered | Error (percentage points) <sup>†</sup> |       |       |       | Absolute error |      |      |       |      |
|--------------------------|--------------------------------------------|-----------------|----------------------------------------|-------|-------|-------|----------------|------|------|-------|------|
|                          |                                            |                 | Median                                 | Q1    | Q3    | (p*)  | Median         | Q1   | Q3   | (p*)  |      |
| All                      | 4047                                       | 98              | 0.88                                   | -3.36 | 5.41  | 0.00  | 4.37           | 2.02 | 7.99 | 0.00  |      |
| Super-region             | Central and Eastern Europe                 | 207             | 98                                     | 2.08  | -1.55 | 4.98  | 0.51           | 3.52 | 1.90 | 6.14  | 0.51 |
|                          | Central Asia, Middle East and North Africa | 522             | 99                                     | 1.40  | -3.30 | 5.62  | 0.03           | 4.62 | 2.11 | 8.59  | 0.03 |
|                          | East and South East Asia                   | 499             | 98                                     | 0.17  | -5.11 | 5.44  | 0.52           | 5.30 | 2.50 | 9.37  | 0.52 |
|                          | High-income Asia Pacific                   | 239             | 97                                     | 2.47  | -0.75 | 5.61  | 0.01           | 4.17 | 1.92 | 6.39  | 0.01 |
|                          | High-income Western countries              | 1162            | 98                                     | 0.15  | -3.31 | 4.94  | 0.85           | 3.96 | 1.90 | 7.16  | 0.85 |
|                          | Latin America and Caribbean                | 523             | 99                                     | 0.22  | -3.60 | 3.77  | 0.43           | 3.64 | 1.58 | 6.66  | 0.43 |
|                          | Oceania                                    | 117             | 96                                     | 5.43  | -1.44 | 13.51 | 0.00           | 9.80 | 4.16 | 16.06 | 0.00 |
|                          | South Asia                                 | 225             | 93                                     | 2.87  | -3.26 | 8.47  | 0.00           | 6.58 | 3.12 | 11.31 | 0.00 |
| Sub-Saharan Africa       | 553                                        | 98              | 0.79                                   | -3.50 | 5.22  | 0.04  | 4.35           | 1.84 | 8.14 | 0.04  |      |
| Urban or rural studies   | Rural                                      | 381             | 90                                     | 3.23  | -3.28 | 9.22  | 0.00           | 6.34 | 3.28 | 11.07 | 0.00 |
|                          | Urban                                      | 981             | 98                                     | 1.78  | -2.82 | 6.97  | 0.00           | 4.71 | 2.20 | 8.48  | 0.00 |
|                          | Both rural and urban                       | 2685            | 99                                     | 0.43  | -3.54 | 4.57  | 0.36           | 4.09 | 1.84 | 7.39  | 0.36 |
| Study representativeness | Community                                  | 1292            | 96                                     | 1.57  | -3.67 | 7.16  | 0.00           | 5.31 | 2.41 | 9.37  | 0.00 |
|                          | Sub-national                               | 517             | 98                                     | 0.85  | -3.57 | 5.76  | 0.46           | 4.37 | 2.30 | 8.35  | 0.46 |
|                          | National                                   | 2238            | 99                                     | 0.64  | -3.08 | 4.62  | 0.06           | 3.95 | 1.75 | 7.14  | 0.06 |
| Age band                 | 18-40                                      | 1695            | 97                                     | 0.64  | -3.95 | 5.02  | 0.01           | 4.53 | 2.02 | 7.92  | 0.01 |
|                          | 40-60                                      | 1211            | 100                                    | 1.34  | -2.97 | 5.48  | 0.01           | 4.36 | 2.08 | 7.88  | 0.01 |
|                          | 60 and above                               | 1141            | 97                                     | 0.79  | -3.03 | 5.91  | 0.05           | 4.17 | 1.94 | 8.30  | 0.05 |
| Years                    | 1975-1984                                  | 166             | 98                                     | 2.18  | -1.90 | 5.17  | 0.10           | 4.17 | 2.17 | 8.29  | 0.10 |
|                          | 1985-1994                                  | 634             | 98                                     | 1.01  | -3.61 | 6.44  | 0.07           | 4.88 | 2.35 | 9.10  | 0.07 |
|                          | 1995-2004                                  | 1515            | 98                                     | 0.74  | -3.24 | 5.03  | 0.26           | 4.27 | 1.94 | 7.60  | 0.26 |
|                          | 2005-2014                                  | 1732            | 98                                     | 0.83  | -3.39 | 5.41  | 0.01           | 4.34 | 1.97 | 7.95  | 0.01 |
| Data density             | Data poor                                  | 116             | 97                                     | 2.71  | -0.85 | 7.23  | 0.05           | 4.41 | 1.94 | 8.39  | 0.05 |
|                          | Average data density                       | 723             | 99                                     | 0.92  | -3.52 | 5.38  | 0.05           | 4.54 | 2.12 | 7.96  | 0.05 |
|                          | Data rich                                  | 3208            | 98                                     | 0.82  | -3.39 | 5.35  | 0.01           | 4.33 | 1.99 | 7.98  | 0.01 |
| Hold out pattern         | Post-2000 data removed                     | 1406            | 98                                     | 0.77  | -3.63 | 4.76  | 0.09           | 4.33 | 1.95 | 7.42  | 0.09 |
|                          | Random set of data removed                 | 2641            | 98                                     | 0.98  | -3.22 | 5.82  | 0.00           | 4.42 | 2.06 | 8.34  | 0.00 |

<sup>†</sup> Estimated values minus held out values.

\* p-values for model error comparisons were calculated using the non-parametric Wilcoxon signed-rank test for paired data. The p-values are calculated assuming independence of the held-out observations. They should therefore be interpreted as an approximation because there is some dependence among the held-out observations, within each of the five repetitions for example.

## Test 2: Women, BMI 30 to <35 kg/m<sup>2</sup>

| Data                     | No. of held out observations               | Percent covered | Error (percentage points) <sup>†</sup> |       |       |      | Absolute error |      |      |      |      |
|--------------------------|--------------------------------------------|-----------------|----------------------------------------|-------|-------|------|----------------|------|------|------|------|
|                          |                                            |                 | Median                                 | Q1    | Q3    | (p*) | Median         | Q1   | Q3   | (p*) |      |
| All                      | 4047                                       | 93              | 0.18                                   | -2.44 | 2.48  | 0.03 | 2.46           | 0.96 | 4.95 | 0.03 |      |
| Super-region             | Central and Eastern Europe                 | 207             | 92                                     | 0.18  | -4.44 | 3.20 | 0.45           | 3.67 | 2.08 | 5.75 | 0.45 |
|                          | Central Asia, Middle East and North Africa | 522             | 96                                     | -0.45 | -4.79 | 2.05 | 0.05           | 3.66 | 1.50 | 6.60 | 0.05 |
|                          | East and South East Asia                   | 499             | 90                                     | 0.21  | -1.51 | 2.02 | 0.09           | 1.82 | 0.66 | 3.40 | 0.09 |
|                          | High-income Asia Pacific                   | 239             | 88                                     | 0.17  | -0.74 | 0.76 | 0.92           | 0.75 | 0.32 | 1.63 | 0.92 |
|                          | High-income Western countries              | 1162            | 96                                     | 0.65  | -2.26 | 3.34 | 0.05           | 2.84 | 1.25 | 5.47 | 0.05 |
|                          | Latin America and Caribbean                | 523             | 96                                     | 0.08  | -2.89 | 2.99 | 0.51           | 2.96 | 1.45 | 5.55 | 0.51 |
|                          | Oceania                                    | 117             | 91                                     | -0.44 | -4.21 | 3.90 | 0.90           | 3.96 | 1.63 | 9.09 | 0.90 |
|                          | South Asia                                 | 225             | 85                                     | 0.29  | -1.47 | 2.07 | 0.02           | 1.89 | 0.75 | 3.71 | 0.02 |
| Sub-Saharan Africa       | 553                                        | 92              | 0.01                                   | -1.91 | 1.62  | 0.40 | 1.71           | 0.54 | 3.87 | 0.40 |      |
| Urban or rural studies   | Rural                                      | 381             | 82                                     | 0.68  | -1.97 | 3.03 | 0.00           | 2.51 | 1.26 | 5.81 | 0.00 |
|                          | Urban                                      | 981             | 95                                     | 0.89  | -2.84 | 3.74 | 0.01           | 3.38 | 1.64 | 6.10 | 0.01 |
|                          | Both rural and urban                       | 2685            | 94                                     | 0.03  | -2.38 | 1.87 | 0.79           | 2.10 | 0.77 | 4.30 | 0.79 |
| Study representativeness | Community                                  | 1292            | 91                                     | 0.33  | -3.21 | 3.09 | 0.11           | 3.13 | 1.38 | 6.03 | 0.11 |
|                          | Sub-national                               | 517             | 96                                     | 0.90  | -1.84 | 3.86 | 0.01           | 3.21 | 1.35 | 5.98 | 0.01 |
|                          | National                                   | 2238            | 94                                     | 0.08  | -2.14 | 1.84 | 0.48           | 1.98 | 0.73 | 3.98 | 0.48 |
| Age band                 | 18-40                                      | 1695            | 88                                     | 0.10  | -1.69 | 1.64 | 0.08           | 1.65 | 0.62 | 3.49 | 0.08 |
|                          | 40-60                                      | 1211            | 99                                     | 0.42  | -2.94 | 2.80 | 0.36           | 2.87 | 1.32 | 5.47 | 0.36 |
|                          | 60 and above                               | 1141            | 95                                     | 0.27  | -3.26 | 3.54 | 0.35           | 3.46 | 1.47 | 6.27 | 0.35 |
| Years                    | 1975-1984                                  | 166             | 92                                     | 0.02  | -3.27 | 3.24 | 0.42           | 3.30 | 0.95 | 6.09 | 0.42 |
|                          | 1985-1994                                  | 634             | 92                                     | 0.17  | -2.23 | 2.56 | 0.24           | 2.39 | 0.91 | 5.36 | 0.24 |
|                          | 1995-2004                                  | 1515            | 94                                     | 0.07  | -2.85 | 2.19 | 0.65           | 2.49 | 0.98 | 4.69 | 0.65 |
|                          | 2005-2014                                  | 1732            | 94                                     | 0.34  | -2.10 | 2.56 | 0.03           | 2.43 | 0.96 | 4.89 | 0.03 |
| Data density             | Data poor                                  | 116             | 85                                     | 0.33  | -3.11 | 3.18 | 0.43           | 3.19 | 1.56 | 5.04 | 0.43 |
|                          | Average data density                       | 723             | 93                                     | 0.14  | -2.83 | 2.56 | 0.10           | 2.71 | 0.97 | 5.33 | 0.10 |
|                          | Data rich                                  | 3208            | 94                                     | 0.19  | -2.38 | 2.42 | 0.13           | 2.39 | 0.94 | 4.87 | 0.13 |
| Hold out pattern         | Post-2000 data removed                     | 1406            | 94                                     | 0.22  | -1.80 | 2.32 | 0.16           | 2.08 | 0.73 | 4.46 | 0.16 |
|                          | Random set of data removed                 | 2641            | 93                                     | 0.16  | -2.86 | 2.54 | 0.17           | 2.65 | 1.09 | 5.20 | 0.17 |

<sup>†</sup> Estimated values minus held out values.

\* p-values for model error comparisons were calculated using the non-parametric Wilcoxon signed-rank test for paired data. The p-values are calculated assuming independence of the held-out observations. They should therefore be interpreted as an approximation because there is some dependence among the held-out observations, within each of the five repetitions for example.

## Test 2: Women, BMI 35 to <40 kg/m<sup>2</sup>

| Data                     | No. of held out observations               | Percent covered | Error (percentage points) <sup>†</sup> |       |       |      | Absolute error |      |      |      |      |
|--------------------------|--------------------------------------------|-----------------|----------------------------------------|-------|-------|------|----------------|------|------|------|------|
|                          |                                            |                 | Median                                 | Q1    | Q3    | (p*) | Median         | Q1   | Q3   | (p*) |      |
| All                      | 4047                                       | 84              | 0.01                                   | -1.19 | 0.71  | 0.05 | 0.90           | 0.26 | 2.32 | 0.05 |      |
| Super-region             | Central and Eastern Europe                 | 207             | 86                                     | 0.08  | -2.35 | 0.98 | 0.33           | 1.43 | 0.68 | 3.10 | 0.33 |
|                          | Central Asia, Middle East and North Africa | 522             | 91                                     | -0.09 | -2.95 | 0.92 | 0.12           | 1.79 | 0.61 | 3.96 | 0.12 |
|                          | East and South East Asia                   | 499             | 75                                     | 0.00  | -0.34 | 0.20 | 0.24           | 0.26 | 0.08 | 0.65 | 0.24 |
|                          | High-income Asia Pacific                   | 239             | 70                                     | 0.00  | -0.23 | 0.08 | 0.34           | 0.13 | 0.04 | 0.32 | 0.34 |
|                          | High-income Western countries              | 1162            | 89                                     | 0.10  | -1.45 | 1.42 | 0.78           | 1.45 | 0.62 | 2.73 | 0.78 |
|                          | Latin America and Caribbean                | 523             | 93                                     | 0.08  | -1.27 | 1.34 | 0.34           | 1.29 | 0.48 | 2.62 | 0.34 |
|                          | Oceania                                    | 117             | 86                                     | -1.92 | -7.38 | 2.71 | 0.25           | 5.53 | 2.00 | 9.45 | 0.25 |
|                          | South Asia                                 | 225             | 74                                     | 0.01  | -0.31 | 0.30 | 0.02           | 0.30 | 0.09 | 0.74 | 0.02 |
| Sub-Saharan Africa       | 553                                        | 78              | 0.00                                   | -0.89 | 0.29  | 0.41 | 0.58           | 0.14 | 1.63 | 0.41 |      |
| Urban or rural studies   | Rural                                      | 381             | 68                                     | 0.12  | -0.59 | 0.74 | 0.00           | 0.68 | 0.21 | 2.22 | 0.00 |
|                          | Urban                                      | 981             | 87                                     | 0.15  | -1.41 | 1.46 | 0.04           | 1.46 | 0.52 | 2.98 | 0.04 |
|                          | Both rural and urban                       | 2685            | 85                                     | -0.02 | -1.18 | 0.47 | 0.73           | 0.77 | 0.23 | 2.04 | 0.73 |
| Study representativeness | Community                                  | 1292            | 81                                     | 0.02  | -1.39 | 0.92 | 0.03           | 1.16 | 0.34 | 2.71 | 0.03 |
|                          | Sub-national                               | 517             | 90                                     | 0.11  | -0.88 | 1.25 | 0.05           | 1.10 | 0.41 | 2.61 | 0.05 |
|                          | National                                   | 2238            | 85                                     | 0.00  | -1.14 | 0.47 | 0.86           | 0.75 | 0.23 | 2.03 | 0.86 |
| Age band                 | 18-40                                      | 1695            | 75                                     | 0.00  | -0.73 | 0.39 | 0.03           | 0.53 | 0.14 | 1.41 | 0.03 |
|                          | 40-60                                      | 1211            | 95                                     | 0.02  | -1.72 | 1.11 | 0.83           | 1.36 | 0.46 | 3.07 | 0.83 |
|                          | 60 and above                               | 1141            | 87                                     | 0.00  | -1.60 | 1.00 | 0.36           | 1.27 | 0.38 | 3.04 | 0.36 |
| Years                    | 1975-1984                                  | 166             | 80                                     | 0.00  | -1.70 | 1.11 | 0.27           | 1.34 | 0.46 | 2.81 | 0.27 |
|                          | 1985-1994                                  | 634             | 81                                     | -0.02 | -1.23 | 0.61 | 0.29           | 0.87 | 0.28 | 2.33 | 0.29 |
|                          | 1995-2004                                  | 1515            | 85                                     | -0.02 | -1.26 | 0.45 | 0.95           | 0.79 | 0.22 | 2.05 | 0.95 |
|                          | 2005-2014                                  | 1732            | 85                                     | 0.05  | -1.10 | 0.91 | 0.03           | 0.98 | 0.30 | 2.50 | 0.03 |
| Data density             | Data poor                                  | 116             | 78                                     | 0.09  | -1.29 | 0.92 | 0.44           | 1.23 | 0.44 | 3.06 | 0.44 |
|                          | Average data density                       | 723             | 84                                     | 0.01  | -1.39 | 0.73 | 0.14           | 0.99 | 0.28 | 2.53 | 0.14 |
|                          | Data rich                                  | 3208            | 85                                     | 0.00  | -1.16 | 0.70 | 0.17           | 0.87 | 0.26 | 2.23 | 0.17 |
| Hold out pattern         | Post-2000 data removed                     | 1406            | 84                                     | 0.00  | -0.78 | 0.48 | 0.77           | 0.63 | 0.16 | 1.91 | 0.77 |
|                          | Random set of data removed                 | 2641            | 84                                     | 0.01  | -1.46 | 0.79 | 0.12           | 1.06 | 0.36 | 2.55 | 0.12 |

<sup>†</sup> Estimated values minus held out values.

\* p-values for model error comparisons were calculated using the non-parametric Wilcoxon signed-rank test for paired data. The p-values are calculated assuming independence of the held-out observations. They should therefore be interpreted as an approximation because there is some dependence among the held-out observations, within each of the five repetitions for example.

## Test 2: Women, BMI $\geq$ 40 kg/m<sup>2</sup>

| Data                     | No. of held out observations               | Percent covered | Error (percentage points) <sup>†</sup> |       |       |      | Absolute error |      |      |      |      |
|--------------------------|--------------------------------------------|-----------------|----------------------------------------|-------|-------|------|----------------|------|------|------|------|
|                          |                                            |                 | Median                                 | Q1    | Q3    | (p*) | Median         | Q1   | Q3   | (p*) |      |
| All                      | 4047                                       | 72              | 0.00                                   | -0.56 | 0.26  | 0.00 | 0.38           | 0.09 | 1.12 | 0.00 |      |
| Super-region             | Central and Eastern Europe                 | 207             | 77                                     | -0.06 | -1.11 | 0.24 | 0.27           | 0.51 | 0.15 | 1.43 | 0.27 |
|                          | Central Asia, Middle East and North Africa | 522             | 84                                     | 0.04  | -1.09 | 0.56 | 0.92           | 0.74 | 0.22 | 1.82 | 0.92 |
|                          | East and South East Asia                   | 499             | 59                                     | 0.00  | -0.14 | 0.03 | 0.08           | 0.08 | 0.02 | 0.19 | 0.08 |
|                          | High-income Asia Pacific                   | 239             | 37                                     | 0.00  | -0.11 | 0.01 | 0.00           | 0.01 | 0.00 | 0.12 | 0.00 |
|                          | High-income Western countries              | 1162            | 77                                     | 0.04  | -0.86 | 0.47 | 0.46           | 0.60 | 0.25 | 1.27 | 0.46 |
|                          | Latin America and Caribbean                | 523             | 83                                     | 0.01  | -0.84 | 0.45 | 0.65           | 0.60 | 0.23 | 1.36 | 0.65 |
|                          | Oceania                                    | 117             | 77                                     | -0.96 | -8.56 | 0.89 | 0.73           | 3.24 | 0.96 | 8.72 | 0.73 |
|                          | South Asia                                 | 225             | 57                                     | 0.00  | -0.10 | 0.05 | 0.00           | 0.06 | 0.02 | 0.20 | 0.00 |
| Sub-Saharan Africa       | 553                                        | 72              | 0.01                                   | -0.53 | 0.22  | 0.05 | 0.35           | 0.08 | 1.01 | 0.05 |      |
| Urban or rural studies   | Rural                                      | 381             | 50                                     | 0.03  | -0.26 | 0.27 | 0.00           | 0.27 | 0.05 | 1.16 | 0.00 |
|                          | Urban                                      | 981             | 76                                     | 0.00  | -0.61 | 0.49 | 0.01           | 0.53 | 0.16 | 1.27 | 0.01 |
|                          | Both rural and urban                       | 2685            | 74                                     | 0.00  | -0.55 | 0.17 | 0.02           | 0.33 | 0.08 | 1.05 | 0.02 |
| Study representativeness | Community                                  | 1292            | 68                                     | 0.00  | -0.67 | 0.31 | 0.00           | 0.43 | 0.11 | 1.20 | 0.00 |
|                          | Sub-national                               | 517             | 80                                     | 0.04  | -0.35 | 0.51 | 0.00           | 0.44 | 0.13 | 1.11 | 0.00 |
|                          | National                                   | 2238            | 73                                     | 0.00  | -0.55 | 0.17 | 0.01           | 0.33 | 0.08 | 1.05 | 0.01 |
| Age band                 | 18-40                                      | 1695            | 62                                     | 0.00  | -0.33 | 0.13 | 0.00           | 0.20 | 0.05 | 0.61 | 0.00 |
|                          | 40-60                                      | 1211            | 85                                     | -0.02 | -0.83 | 0.51 | 0.44           | 0.61 | 0.17 | 1.51 | 0.44 |
|                          | 60 and above                               | 1141            | 74                                     | 0.00  | -0.79 | 0.37 | 0.02           | 0.51 | 0.14 | 1.39 | 0.02 |
| Years                    | 1975-1984                                  | 166             | 61                                     | 0.00  | -0.66 | 0.27 | 0.23           | 0.50 | 0.15 | 1.05 | 0.23 |
|                          | 1985-1994                                  | 634             | 69                                     | 0.00  | -0.54 | 0.22 | 0.01           | 0.35 | 0.08 | 0.91 | 0.01 |
|                          | 1995-2004                                  | 1515            | 74                                     | 0.00  | -0.50 | 0.15 | 0.06           | 0.31 | 0.07 | 0.95 | 0.06 |
|                          | 2005-2014                                  | 1732            | 73                                     | 0.01  | -0.59 | 0.36 | 0.00           | 0.45 | 0.11 | 1.36 | 0.00 |
| Data density             | Data poor                                  | 116             | 66                                     | 0.03  | -1.13 | 0.41 | 0.49           | 0.61 | 0.17 | 1.60 | 0.49 |
|                          | Average data density                       | 723             | 75                                     | 0.01  | -0.55 | 0.25 | 0.03           | 0.40 | 0.10 | 1.25 | 0.03 |
|                          | Data rich                                  | 3208            | 72                                     | 0.00  | -0.55 | 0.25 | 0.00           | 0.37 | 0.09 | 1.08 | 0.00 |
| Hold out pattern         | Post-2000 data removed                     | 1406            | 69                                     | 0.00  | -0.27 | 0.16 | 0.00           | 0.23 | 0.04 | 0.88 | 0.00 |
|                          | Random set of data removed                 | 2641            | 74                                     | 0.01  | -0.74 | 0.29 | 0.00           | 0.46 | 0.12 | 1.24 | 0.00 |

<sup>†</sup> Estimated values minus held out values.

\* p-values for model error comparisons were calculated using the non-parametric Wilcoxon signed-rank test for paired data. The p-values are calculated assuming independence of the held-out observations. They should therefore be interpreted as an approximation because there is some dependence among the held-out observations, within each of the five repetitions for example.

**Appendix Figure 1:** Flowchart of secondary search for data sources.

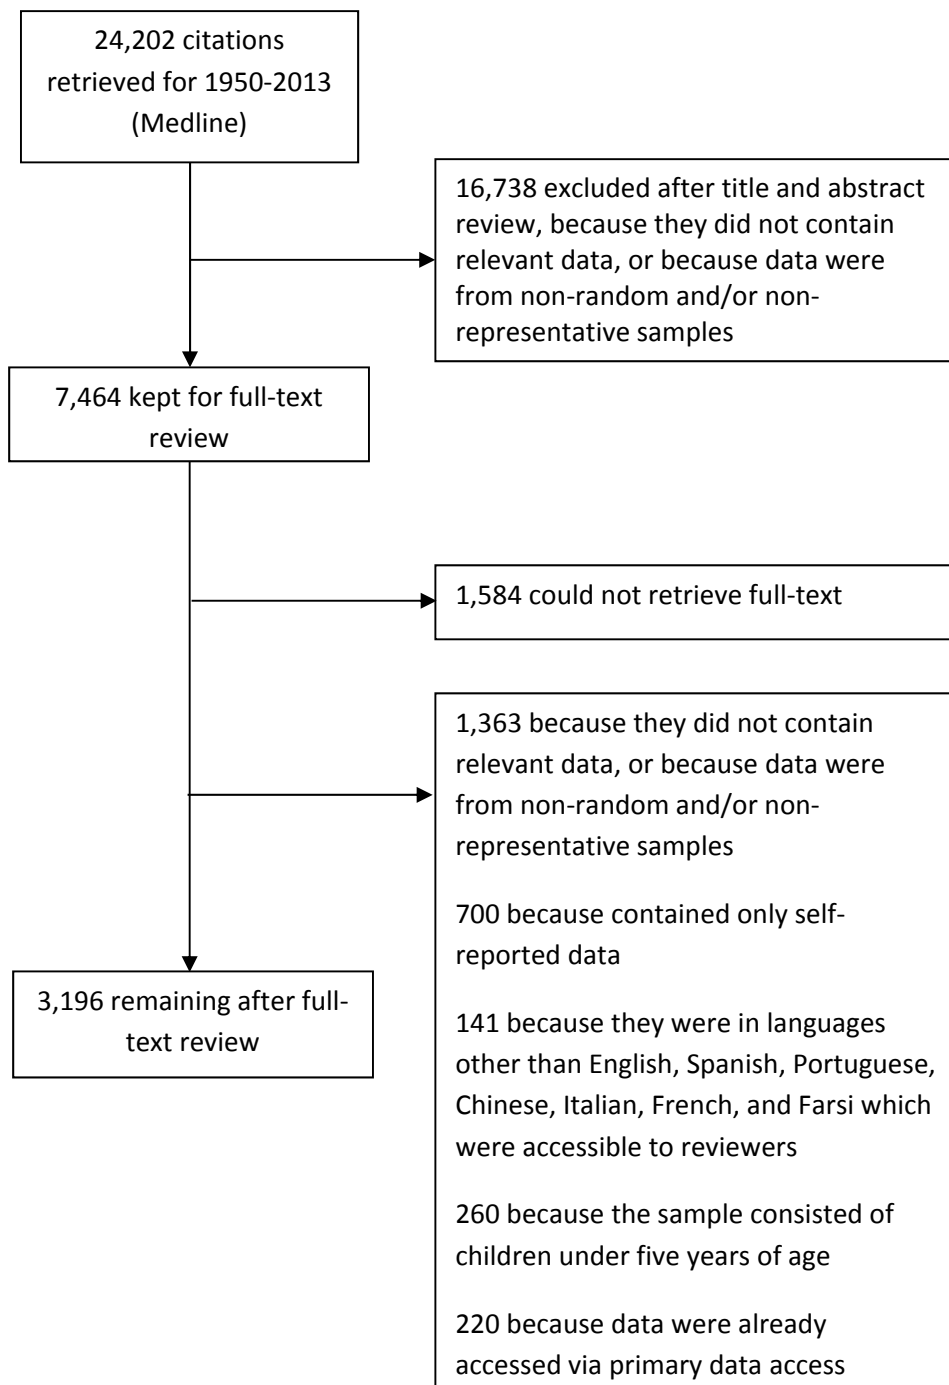



**Appendix Figure 2:** Number of data sources used in the analysis, by country.

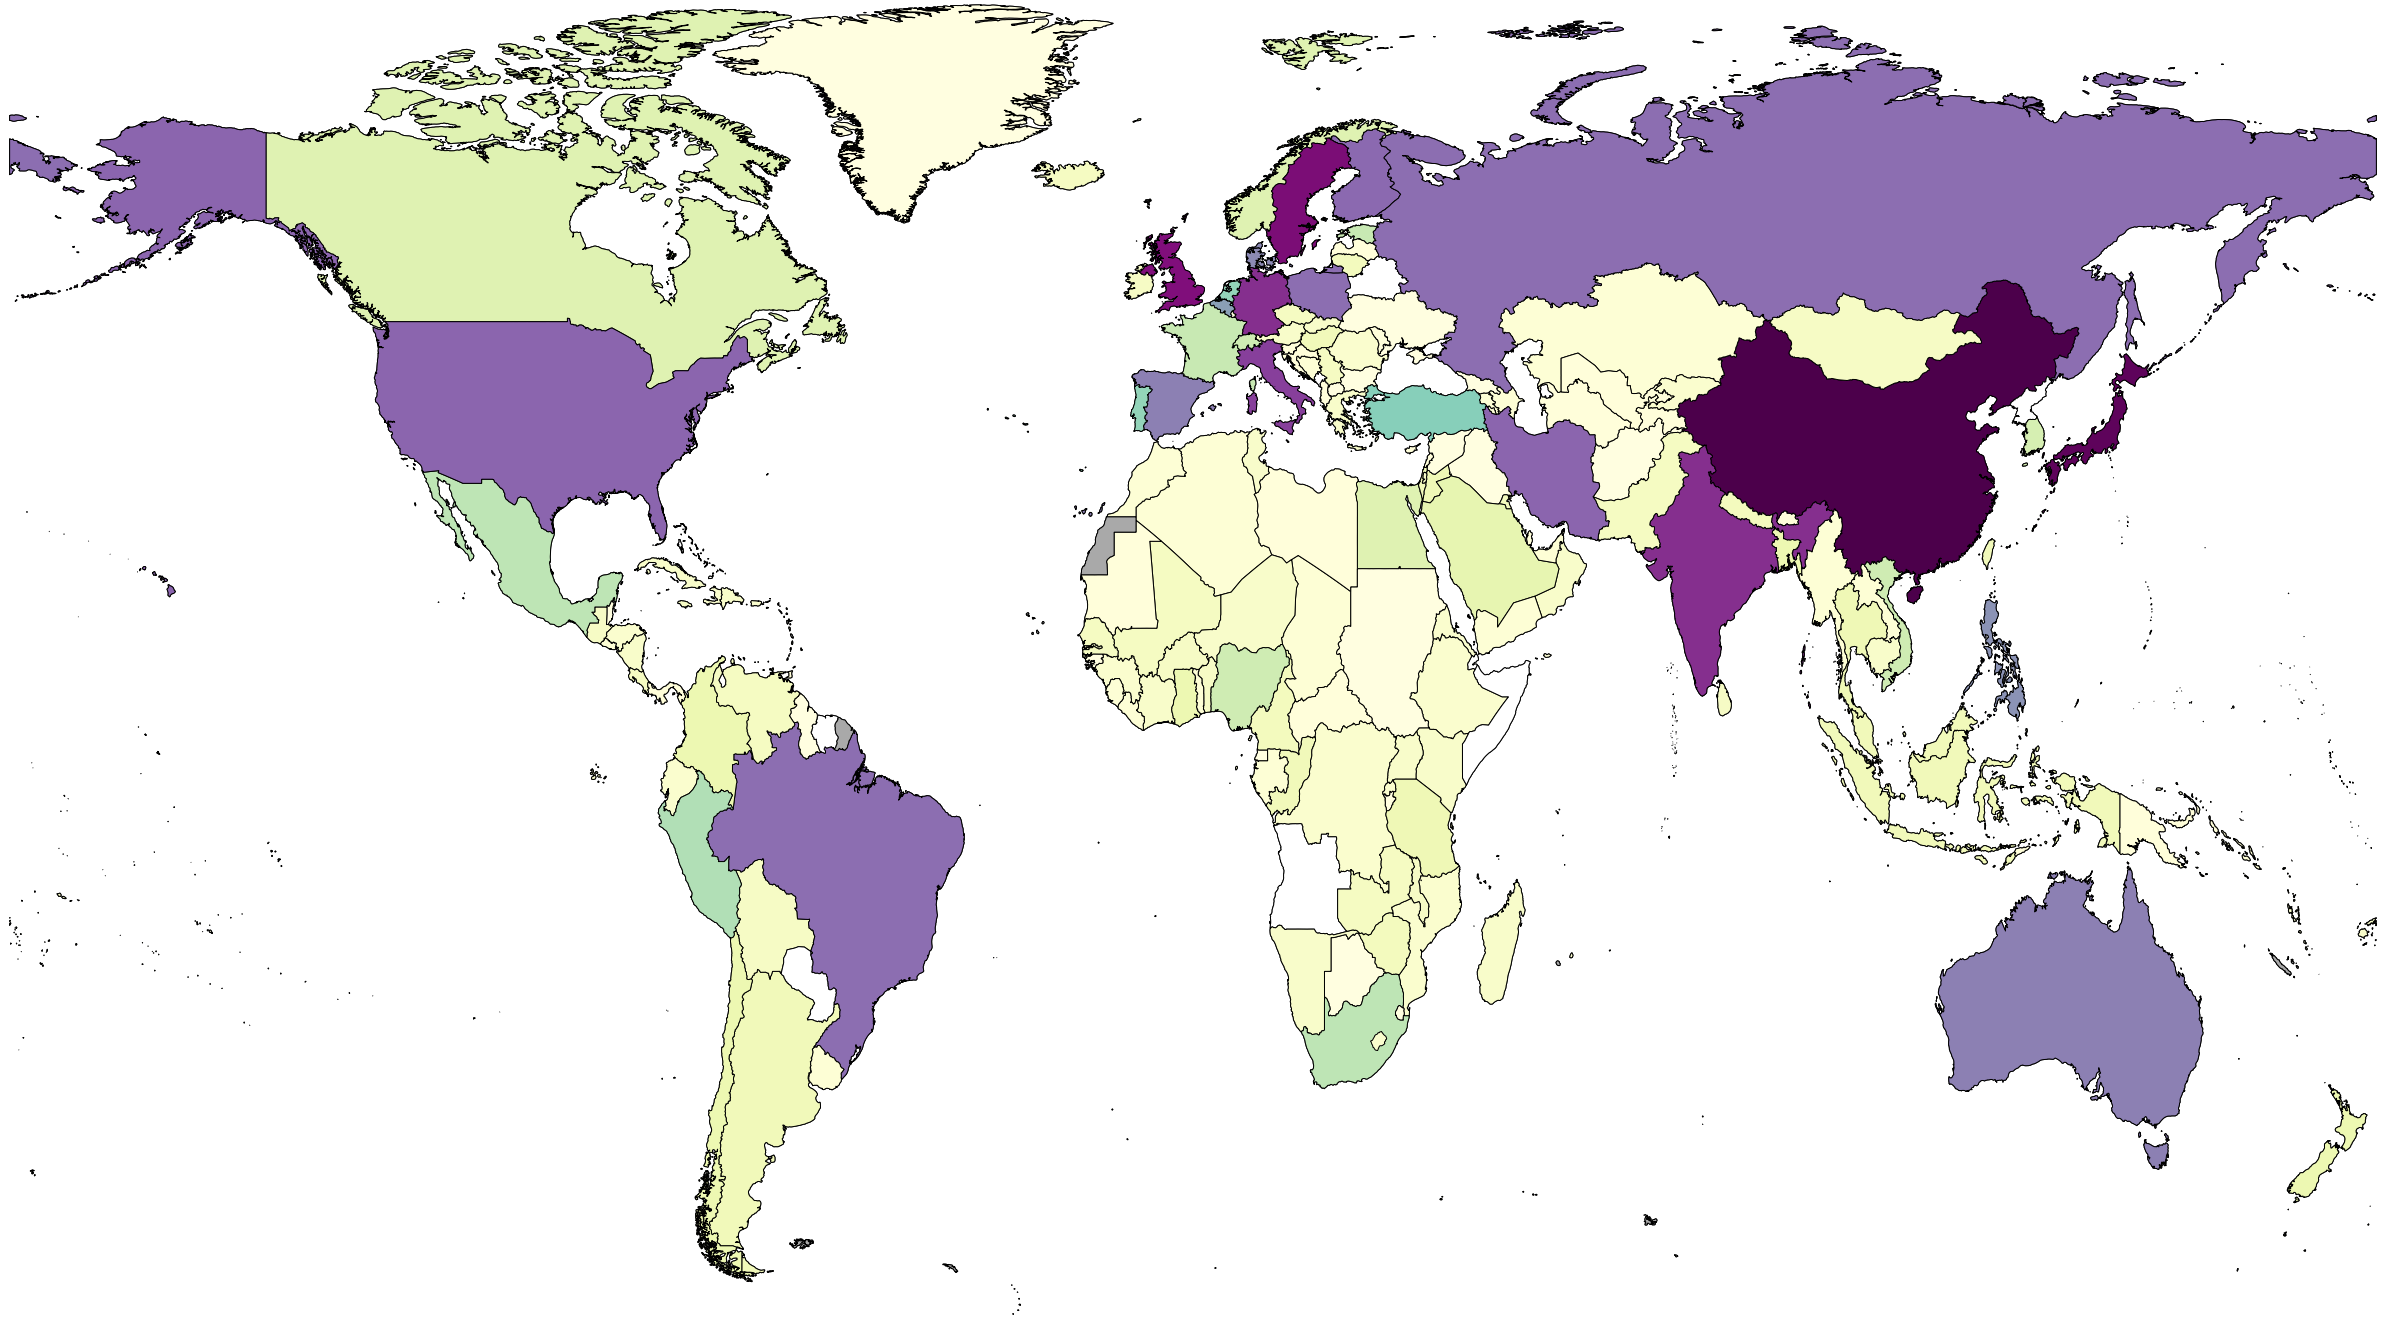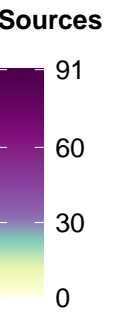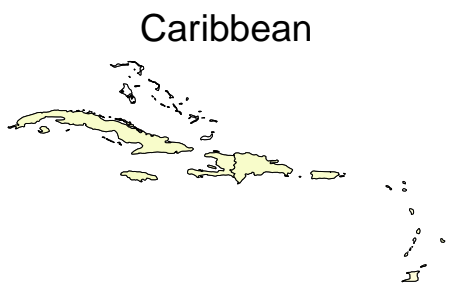

|                 |                  |          |                   |                  |                       |                 |
|-----------------|------------------|----------|-------------------|------------------|-----------------------|-----------------|
| American Samoa  | Bahrain          | Bermuda  | Brunei Darussalam | Cabo Verde       | Comoros               | Cook Islands    |
| Fiji            | French Polynesia | Kiribati | Maldives          | Marshall Islands | Mauritius             | Micronesia F.S. |
| Montenegro      | Nauru            | Niue     | Palau             | Samoa            | Sao Tome and Principe | Seychelles      |
| Solomon Islands | Tokelau          | Tonga    | Tuvalu            | Vanuatu          |                       |                 |

**Appendix Figure 3:** Number of data sources by region and year.

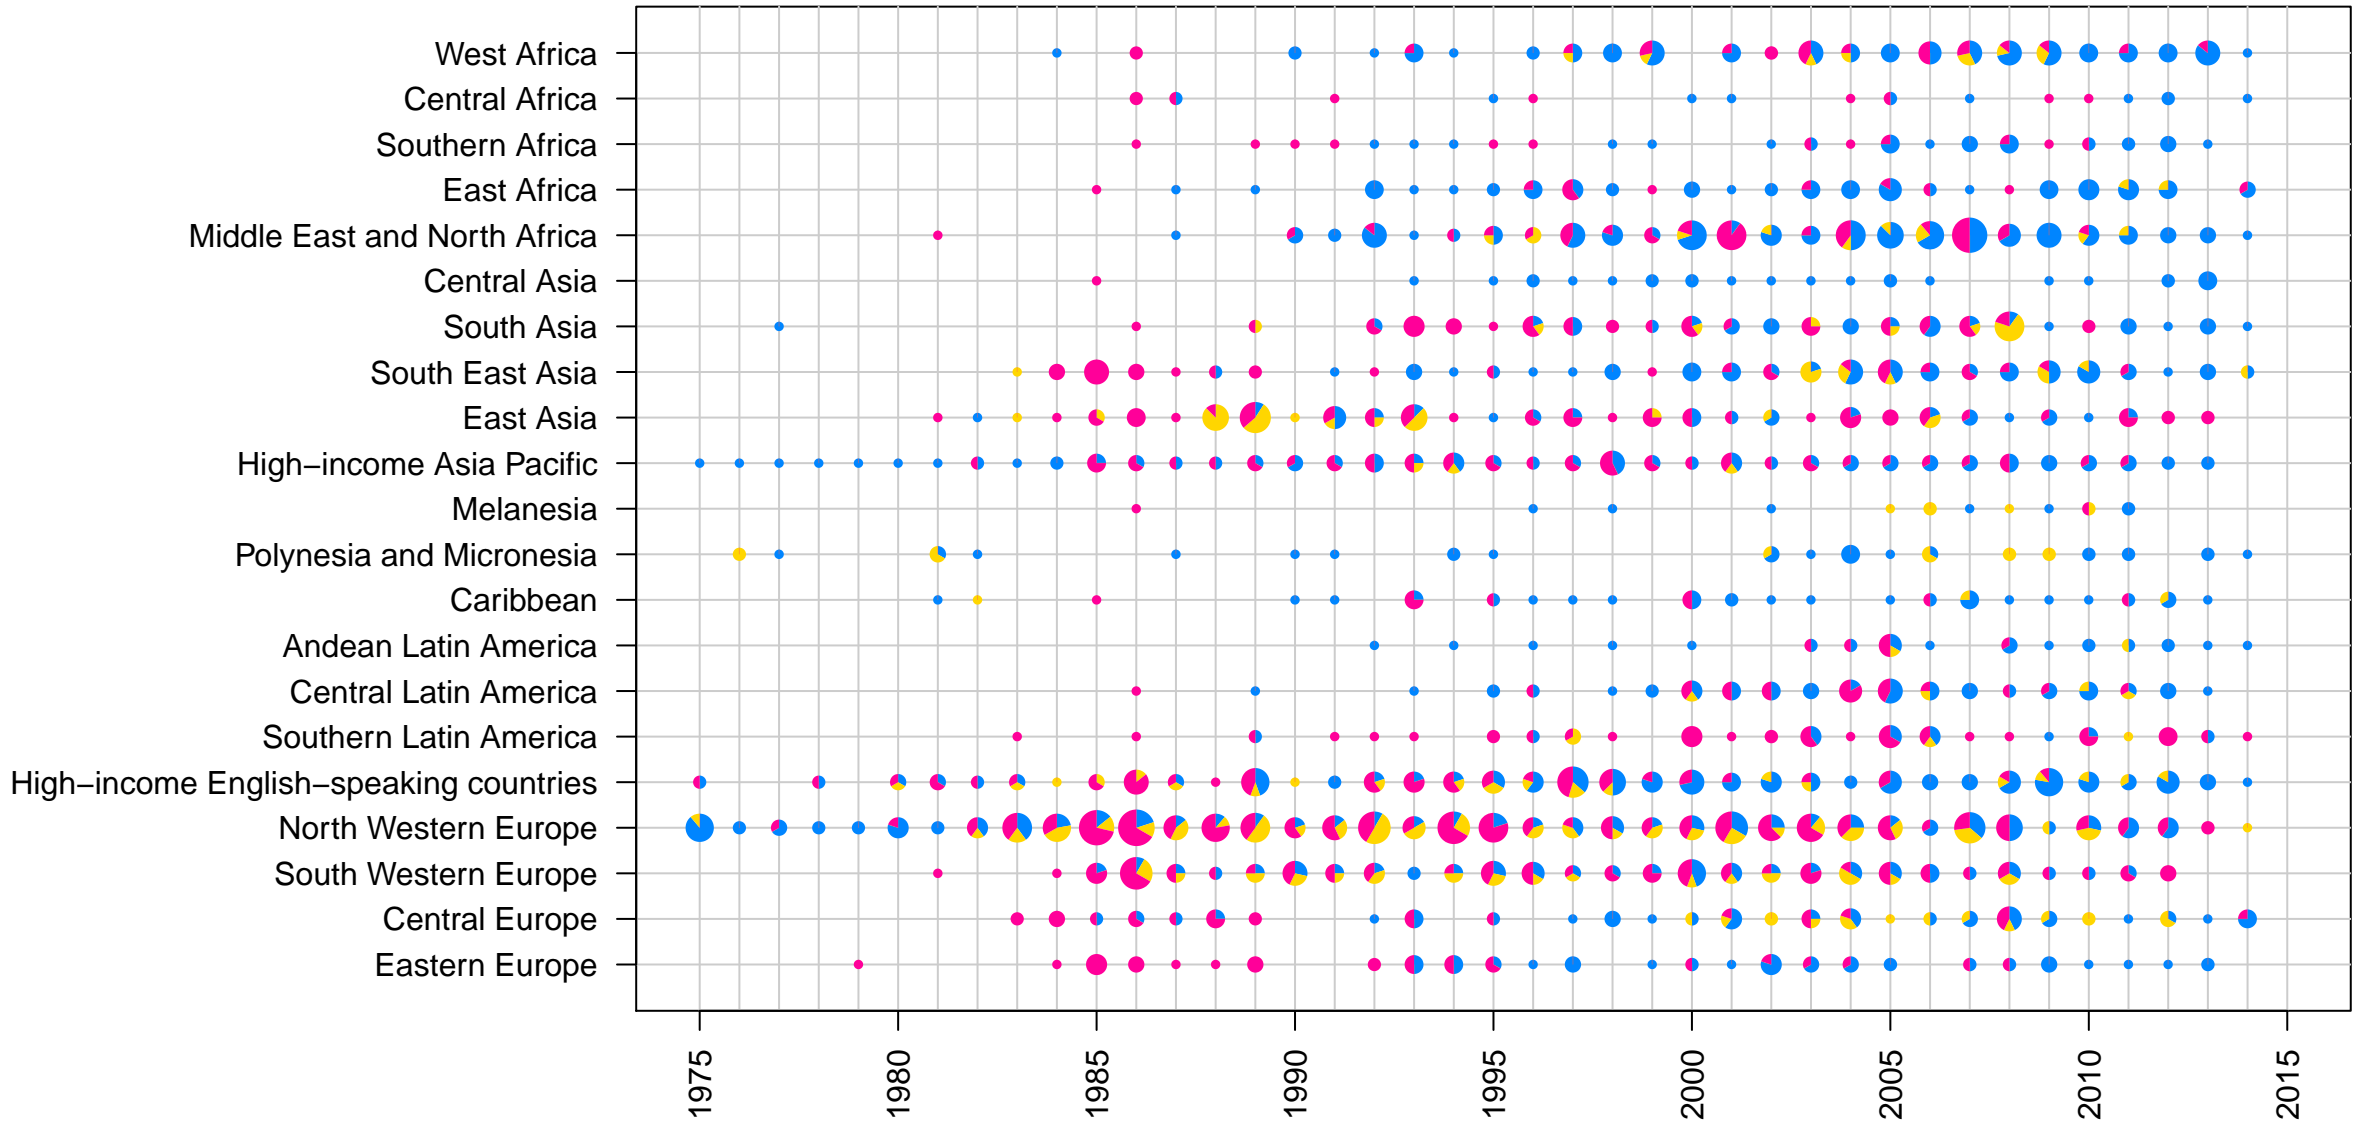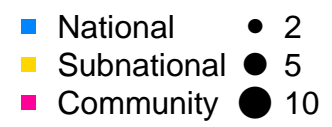

**Appendix Figure 4:** Comparison of age-standardised mean BMI estimated using models with and without covariates.

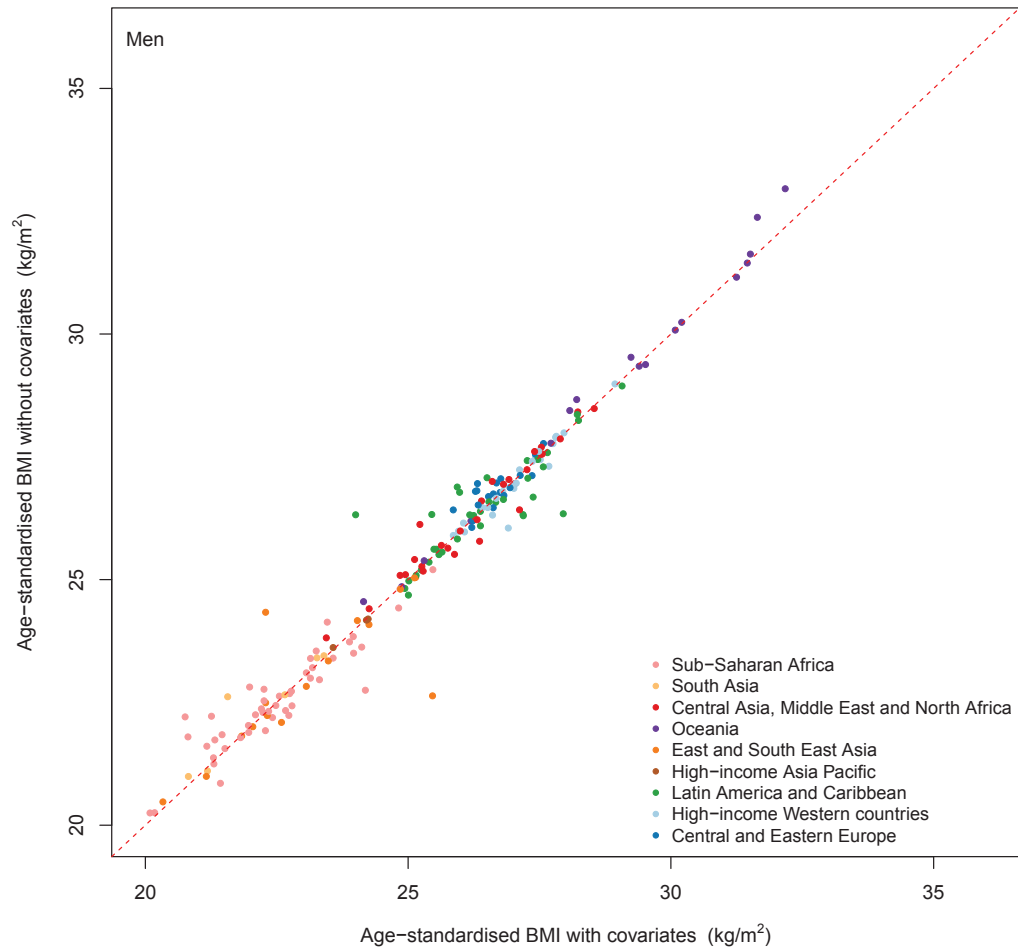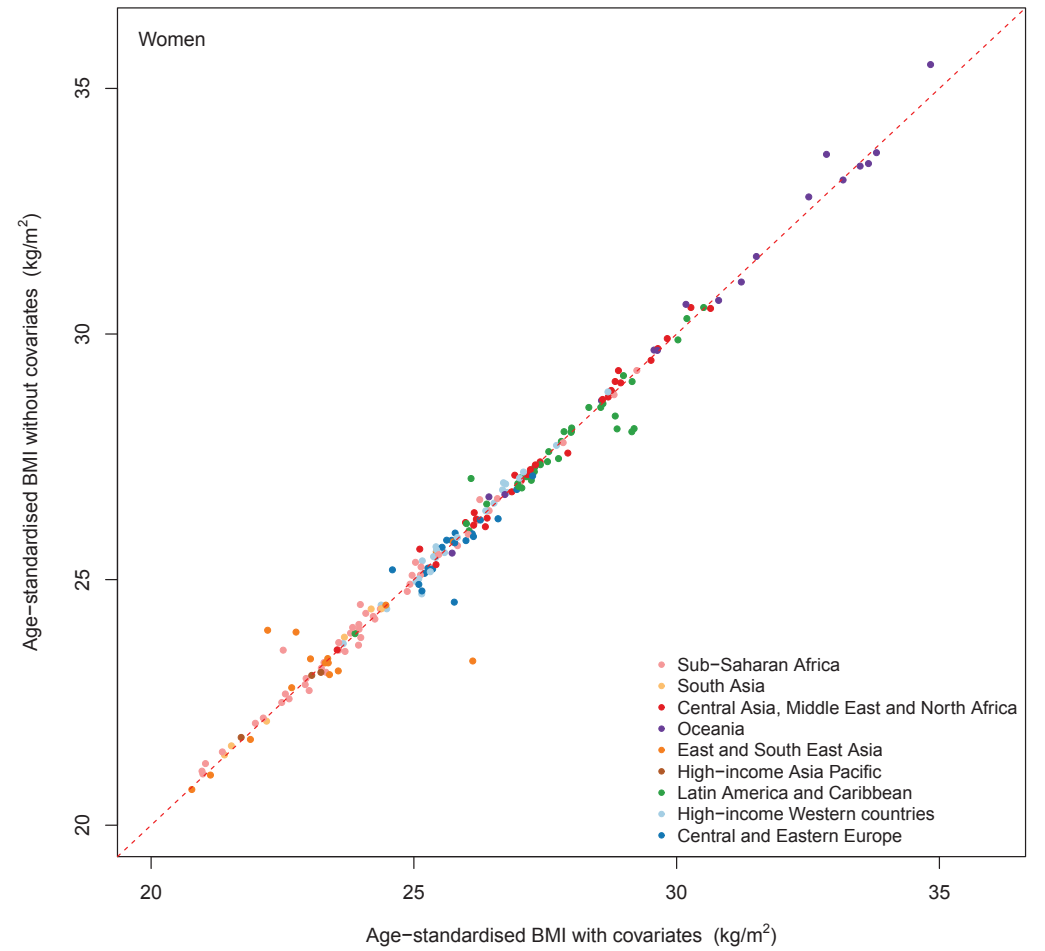

**Appendix Figure 5:** Standard deviation (SD) of BMI in 1975 vs. 2014, for ages 20-24 years, 45-49 years and 70-74 years. Each point shows one country.

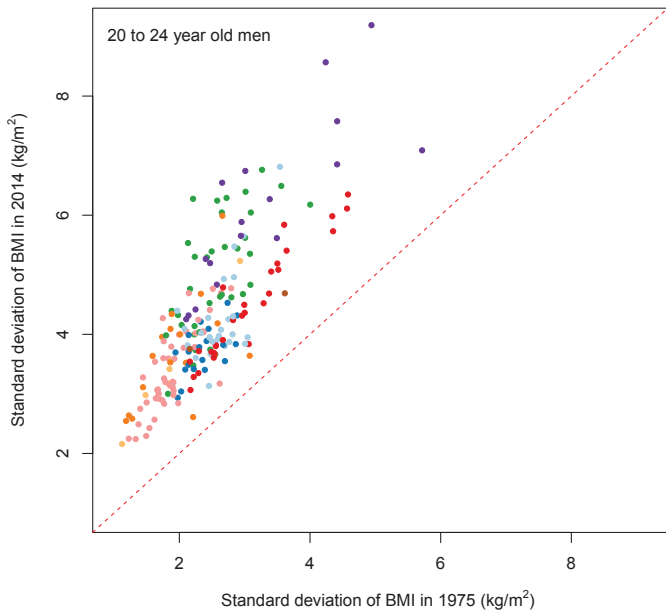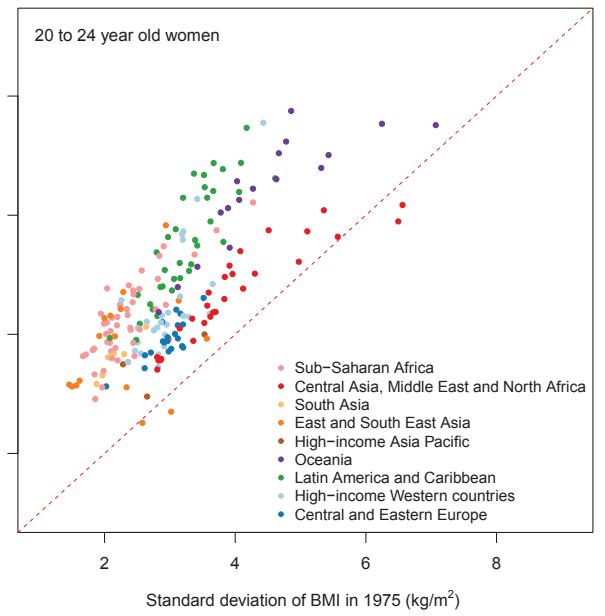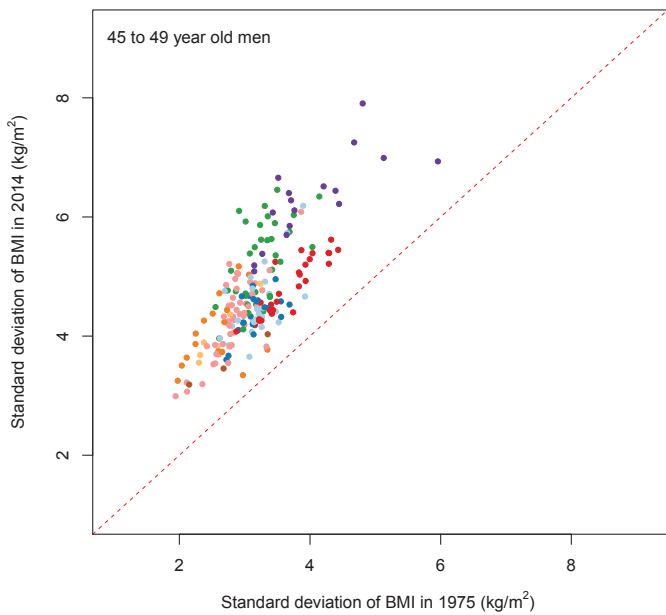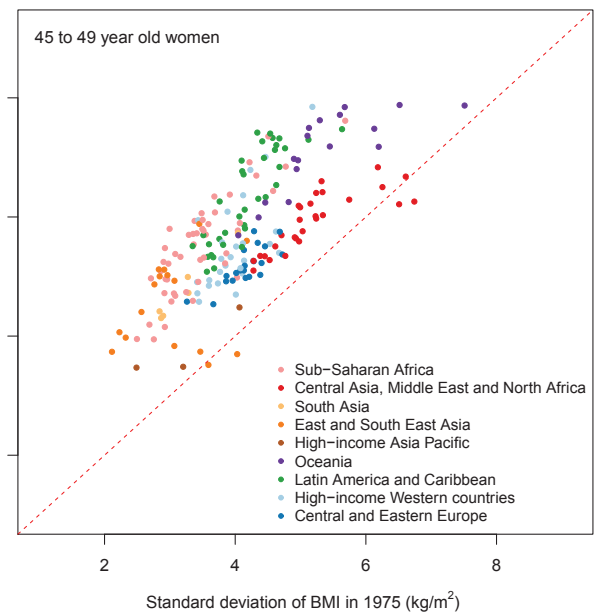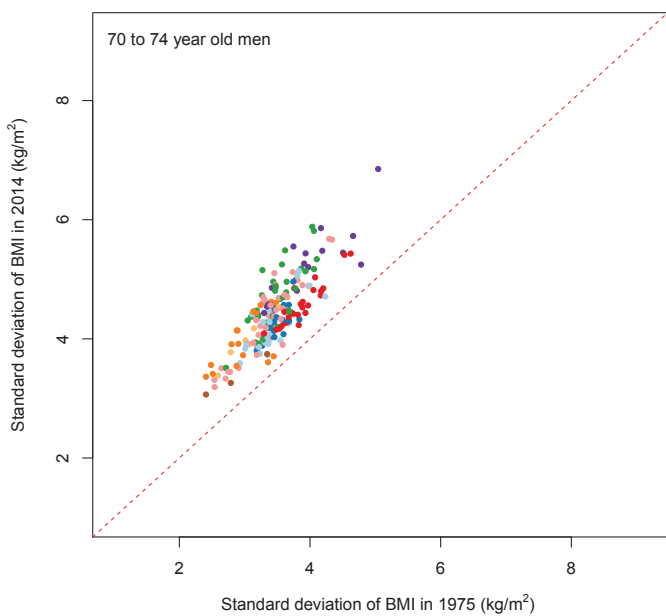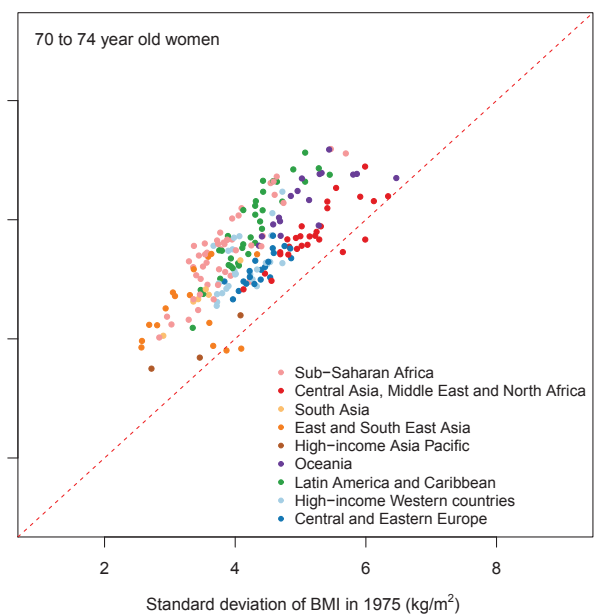



**Appendix Figure 6:** Male vs. female age standardised mean BMI in 1975 and 2014, and change from 1975 to 2014.

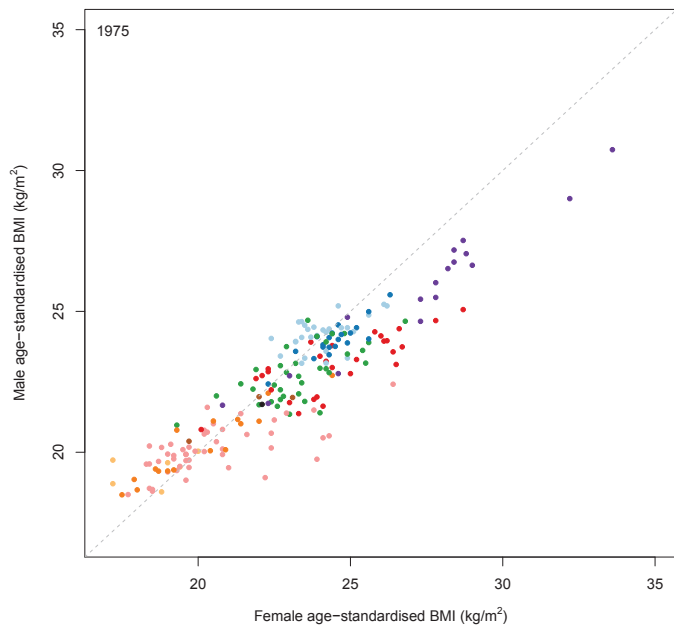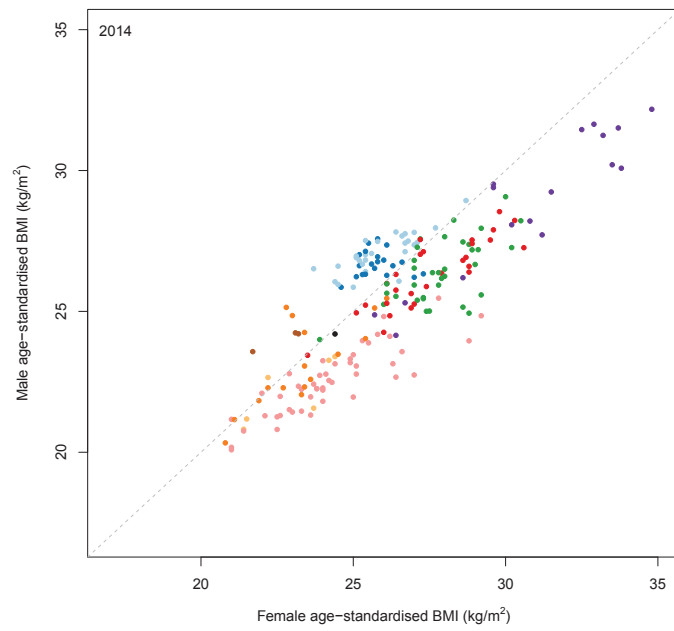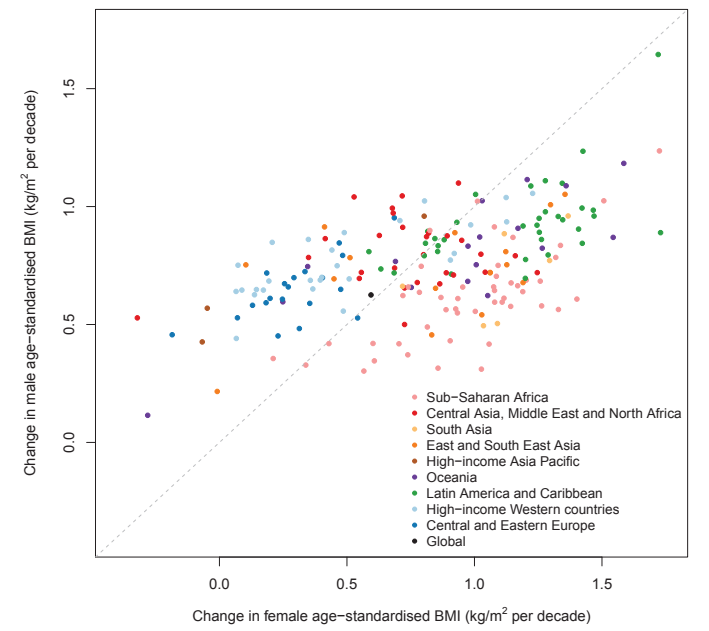

**Appendix Figure 7:** Probability of achieving the target of halting the rise of obesity compared to its 2010 levels by country if post-2000 trends continue.

Men

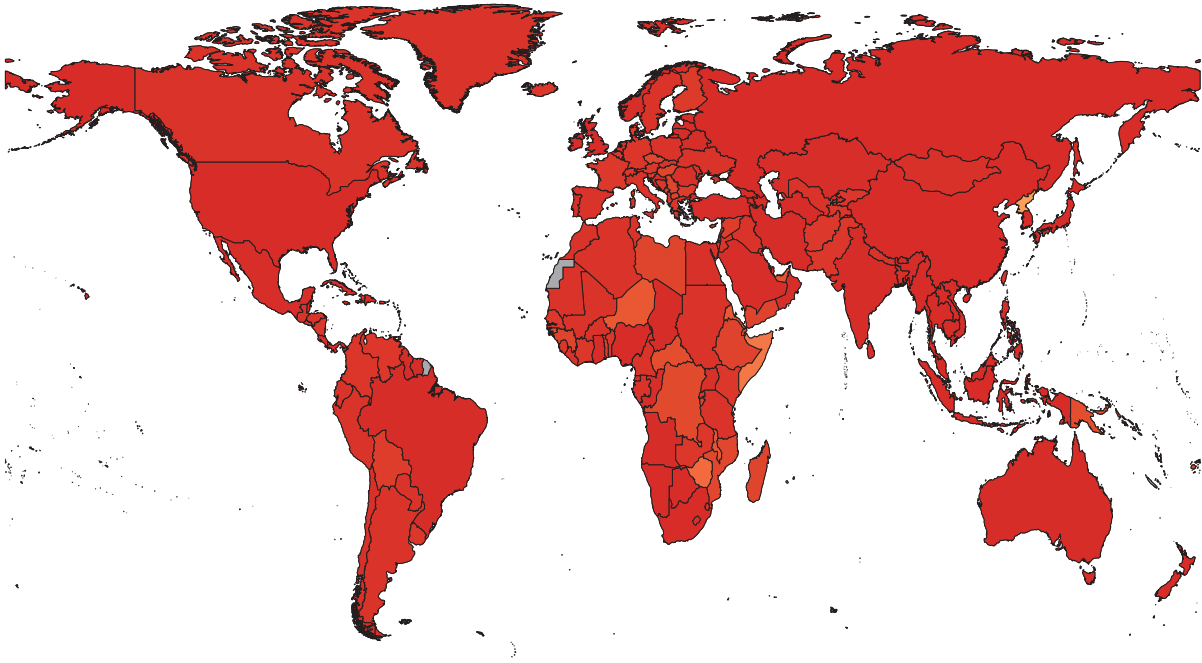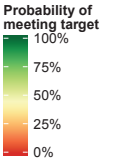

Caribbean

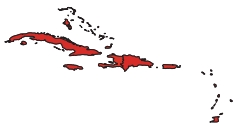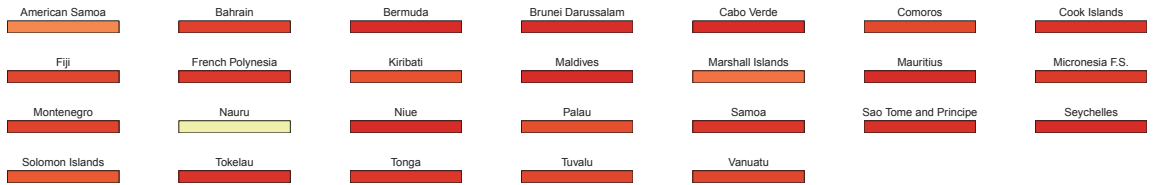

Women

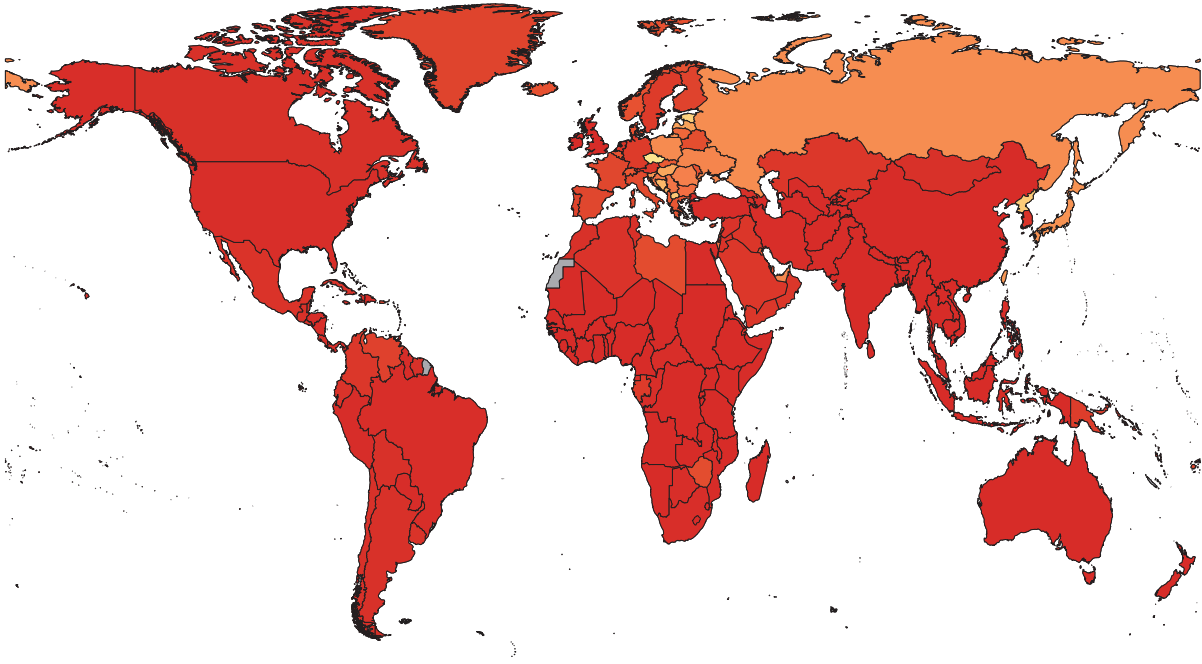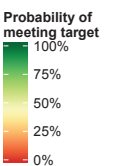

Caribbean

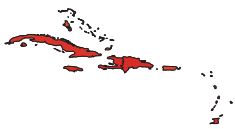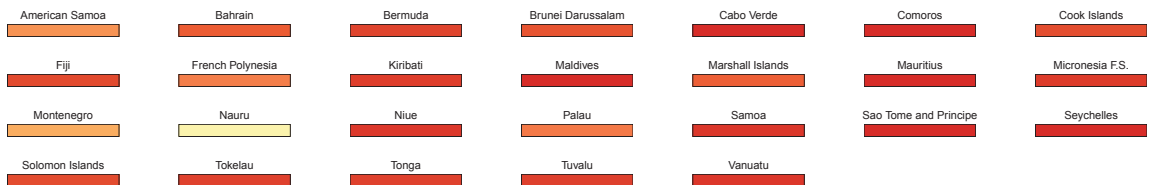

**Appendix Figure 8:** Trends in age-standardised mean BMI and prevalences of BMI categories by sex and country.

Afghanistan  
South Asia

Men

Women

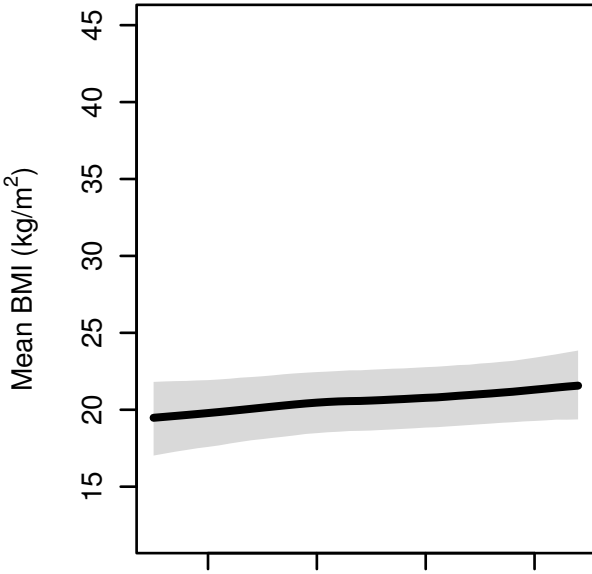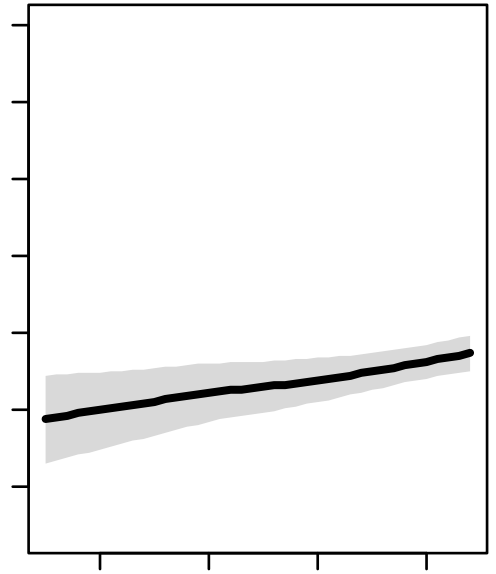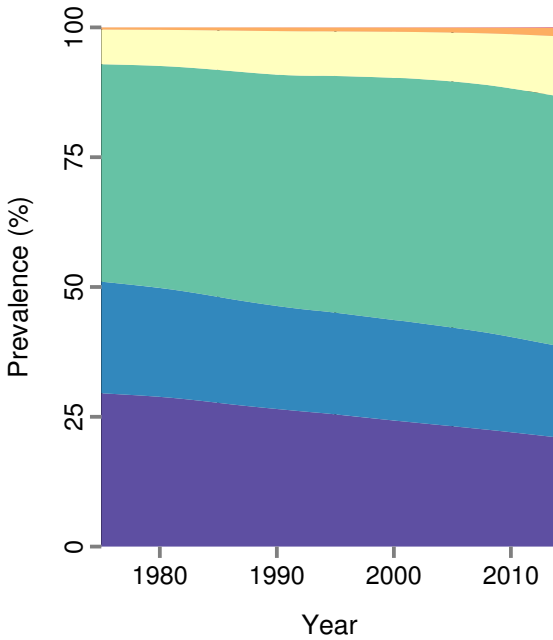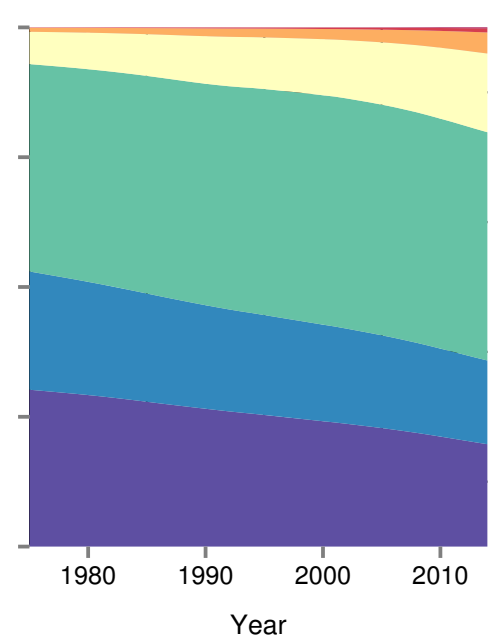

■ BMI <18.5 ■ BMI 18.5-20 ■ BMI 20-25 ■ BMI 25-30 ■ BMI 30-35 ■ BMI 35-40 ■ BMI ≥ 40

Albania  
Central Europe

Men

Women

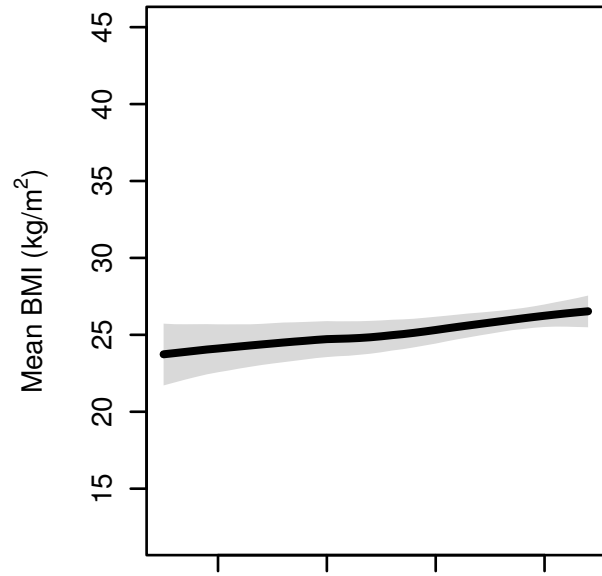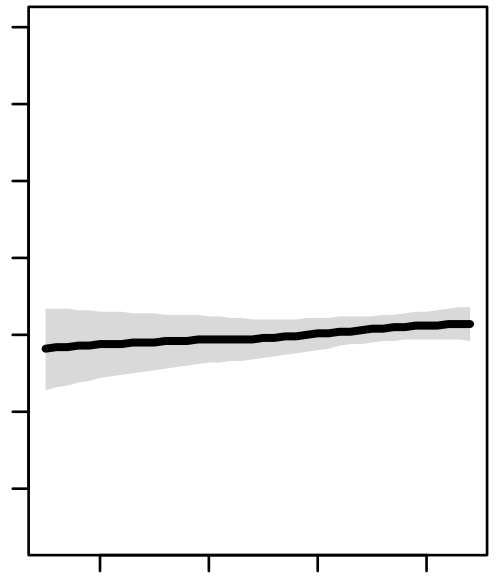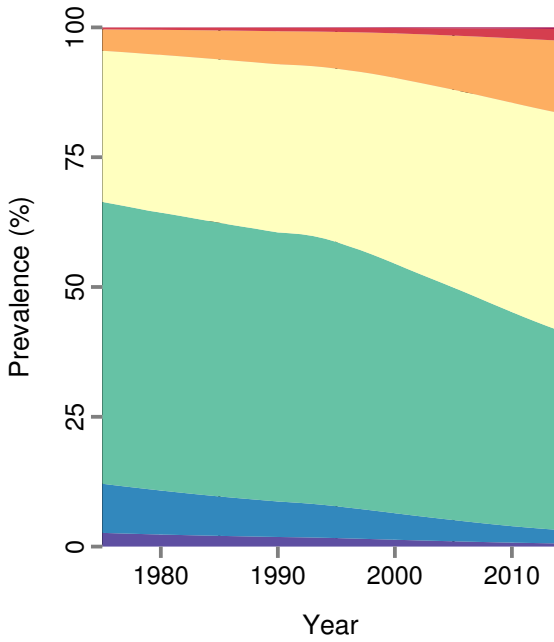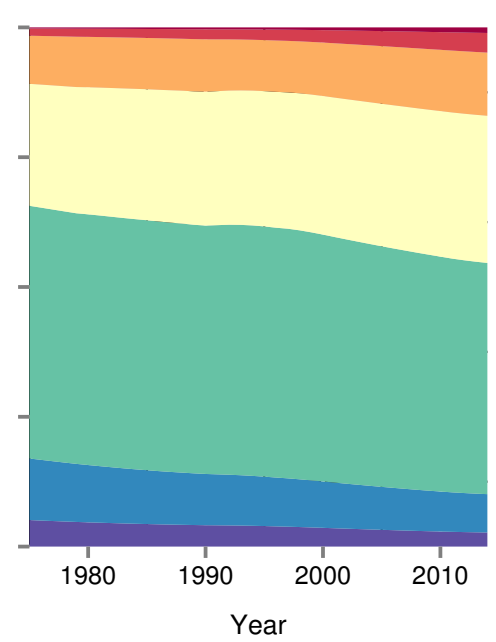

■ BMI <18.5 ■ BMI 18.5-20 ■ BMI 20-25 ■ BMI 25-30 ■ BMI 30-35 ■ BMI 35-40 ■ BMI ≥ 40

# Algeria

Middle East and North Africa

## Men

## Women

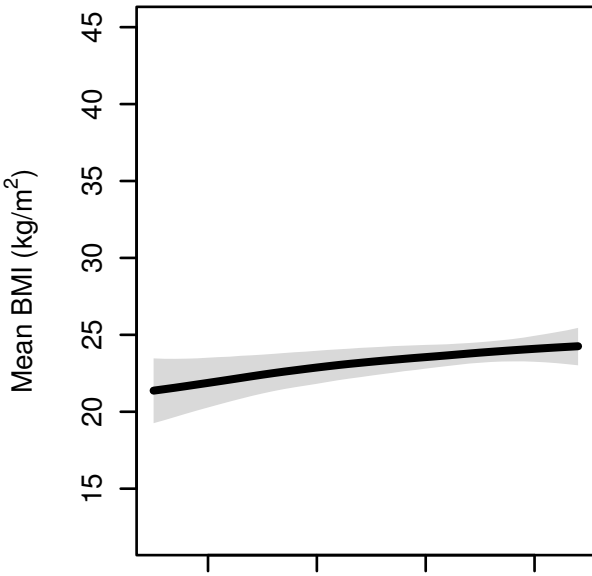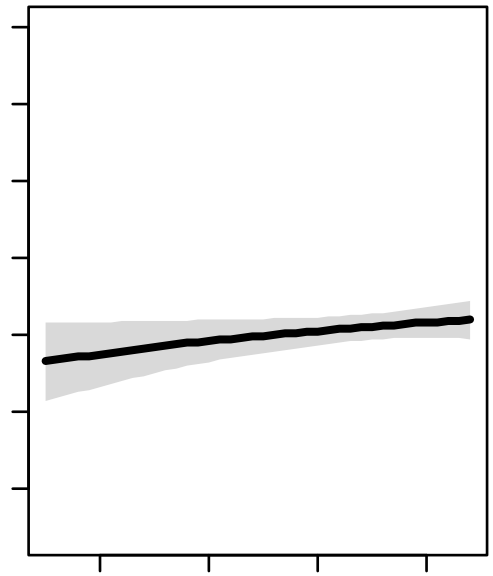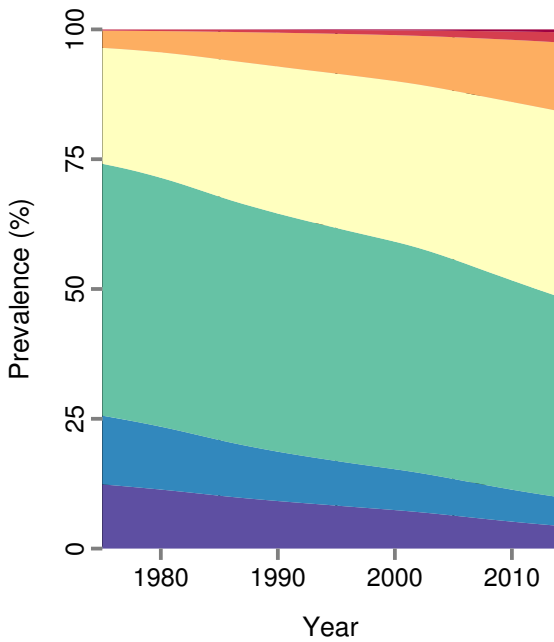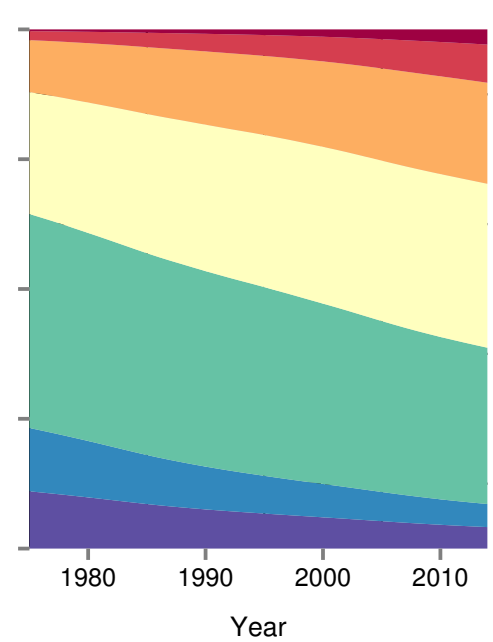

■ BMI <18.5 ■ BMI 18.5-20 ■ BMI 20-25 ■ BMI 25-30 ■ BMI 30-35 ■ BMI 35-40 ■ BMI ≥ 40



# American Samoa Polynesia and Micronesia

## Men

## Women

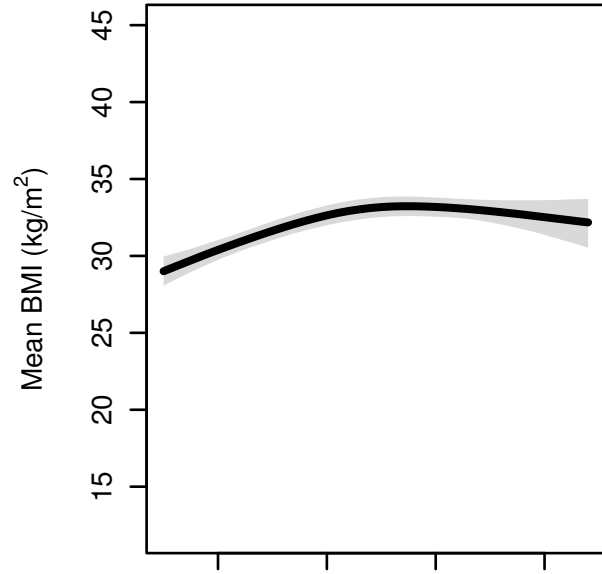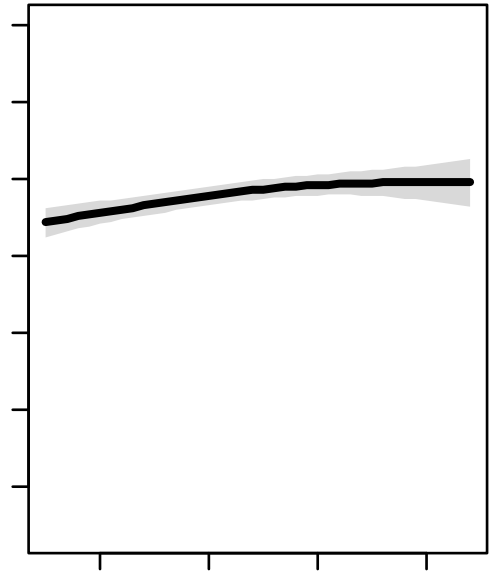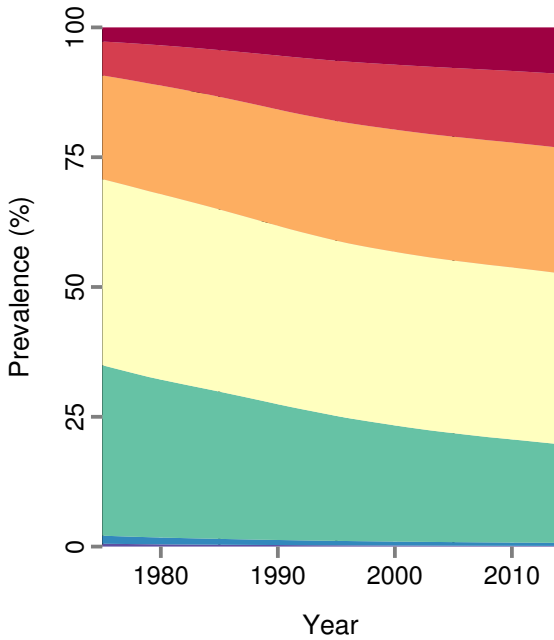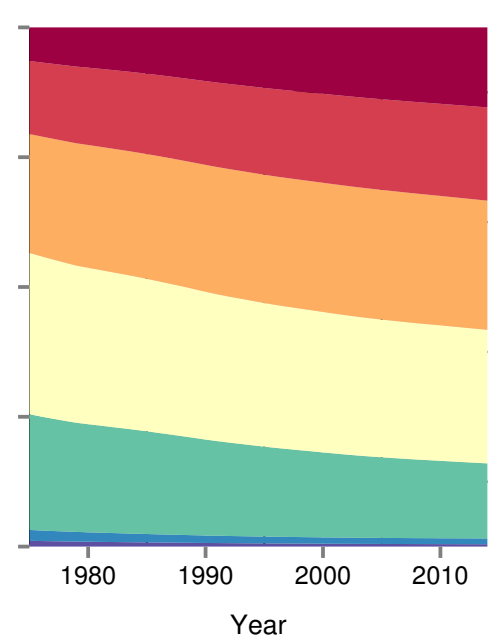

■ BMI <18.5 ■ BMI 18.5-20 ■ BMI 20-25 ■ BMI 25-30 ■ BMI 30-35 ■ BMI 35-40 ■ BMI ≥ 40

Andorra  
South Western Europe

Men

Women

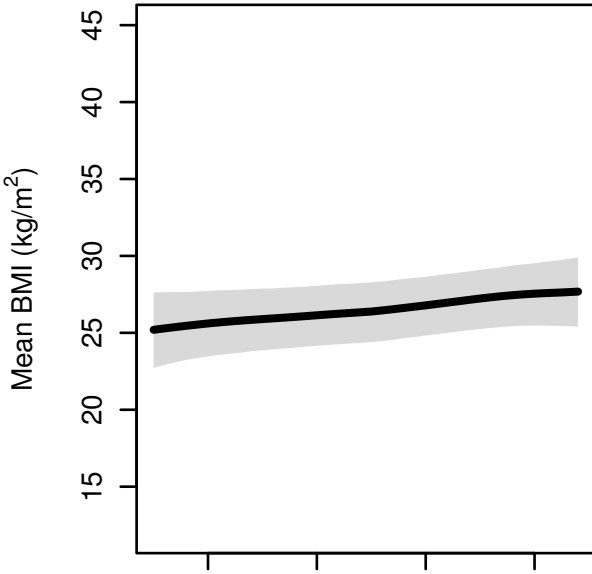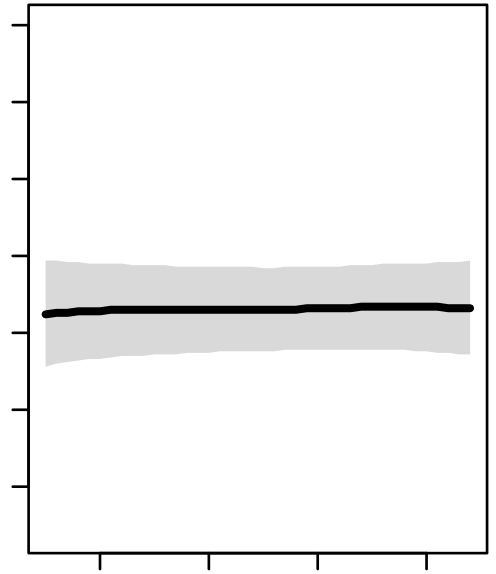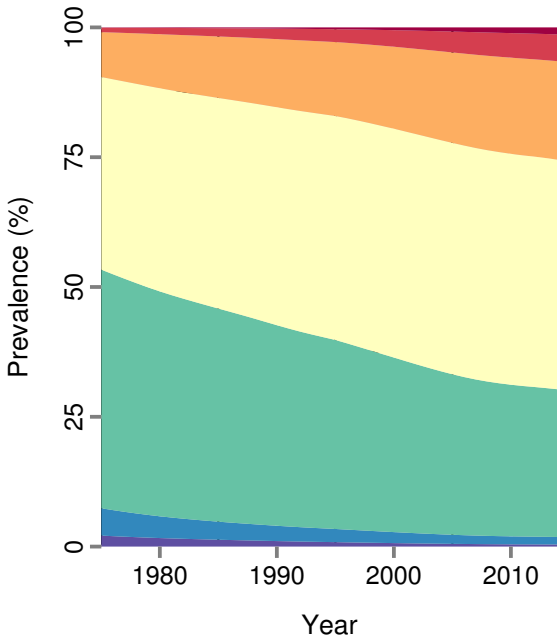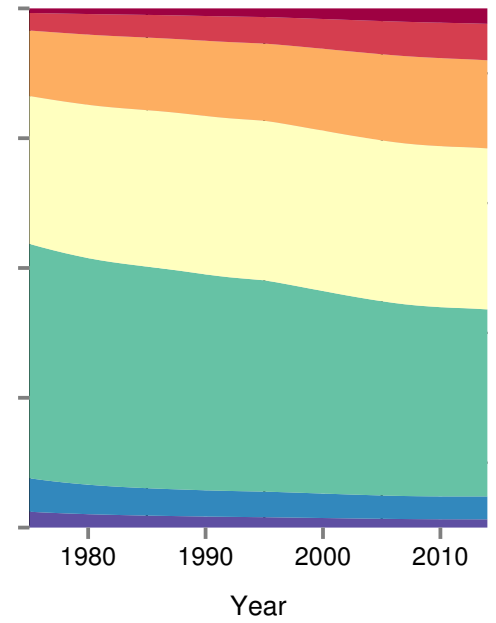

■ BMI <18.5 ■ BMI 18.5-20 ■ BMI 20-25 ■ BMI 25-30 ■ BMI 30-35 ■ BMI 35-40 ■ BMI ≥ 40

Angola  
Central Africa

Men

Women

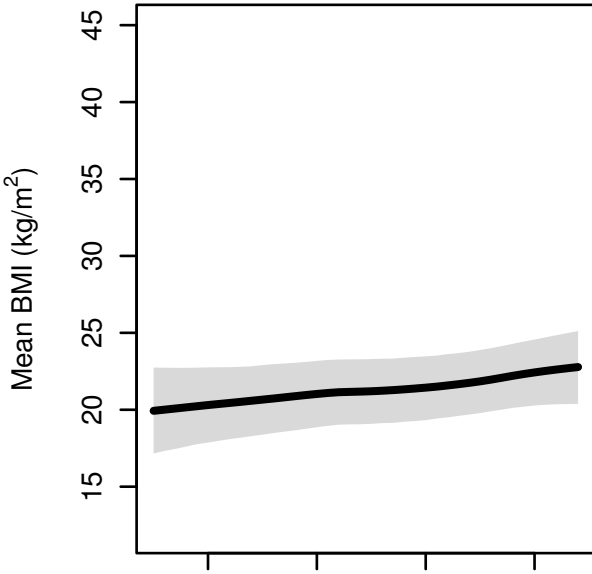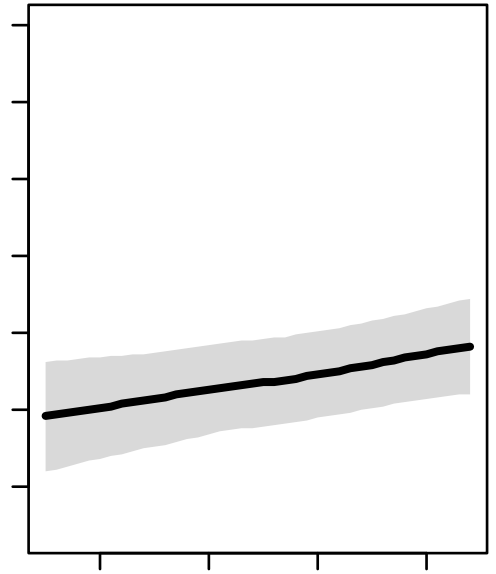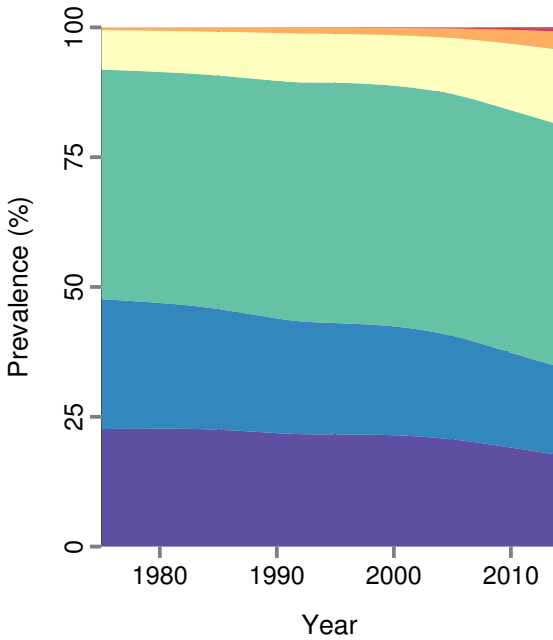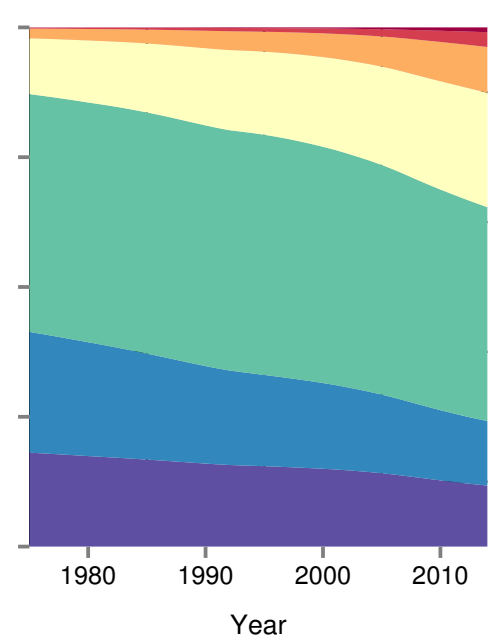

■ BMI <18.5 ■ BMI 18.5-20 ■ BMI 20-25 ■ BMI 25-30 ■ BMI 30-35 ■ BMI 35-40 ■ BMI ≥ 40

# Antigua and Barbuda Caribbean

## Men

## Women

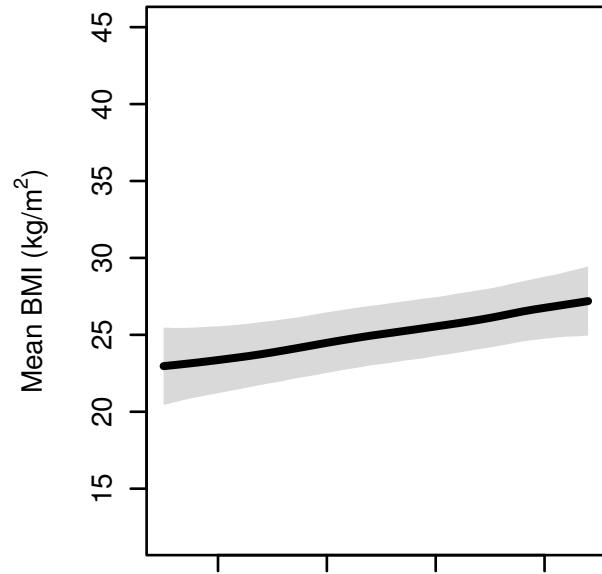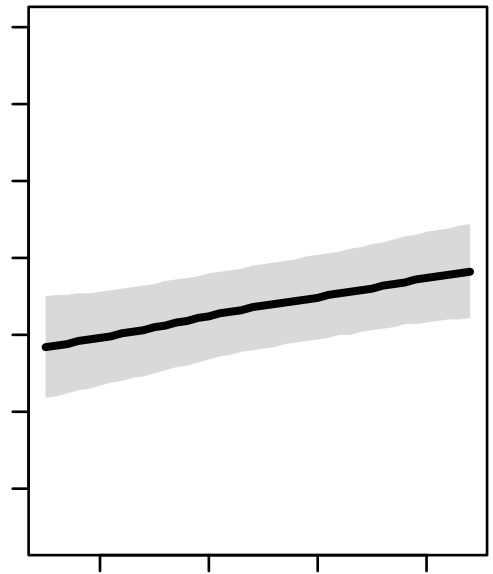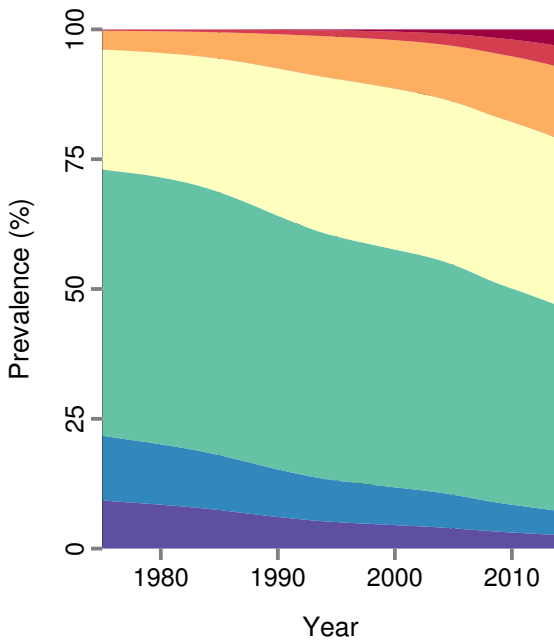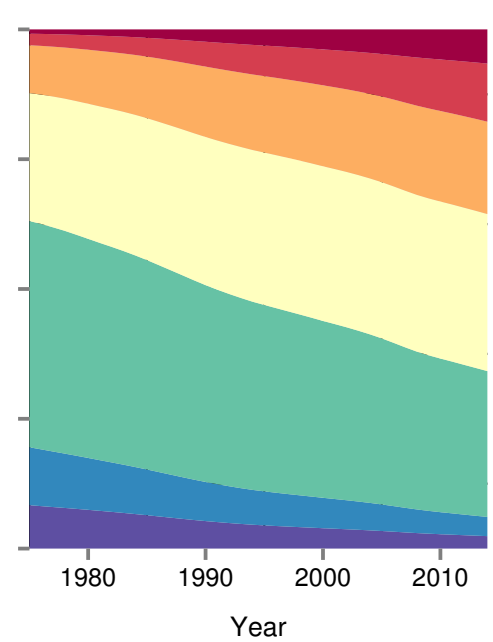

■ BMI <18.5 ■ BMI 18.5-20 ■ BMI 20-25 ■ BMI 25-30 ■ BMI 30-35 ■ BMI 35-40 ■ BMI ≥ 40

# Argentina

## Southern Latin America

### Men

### Women

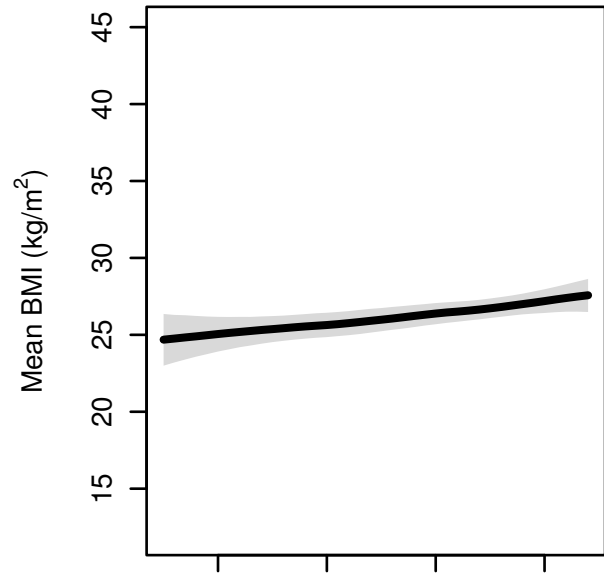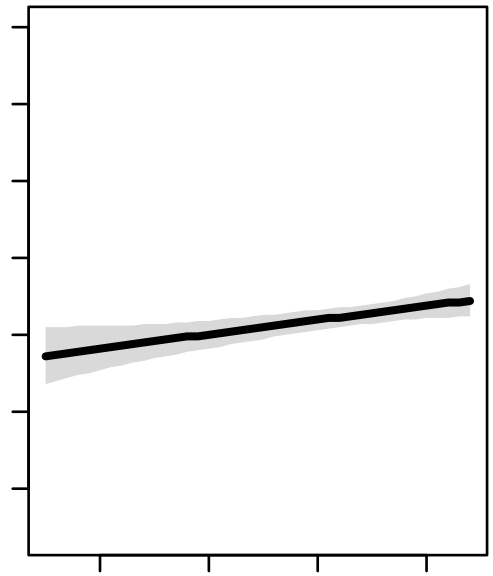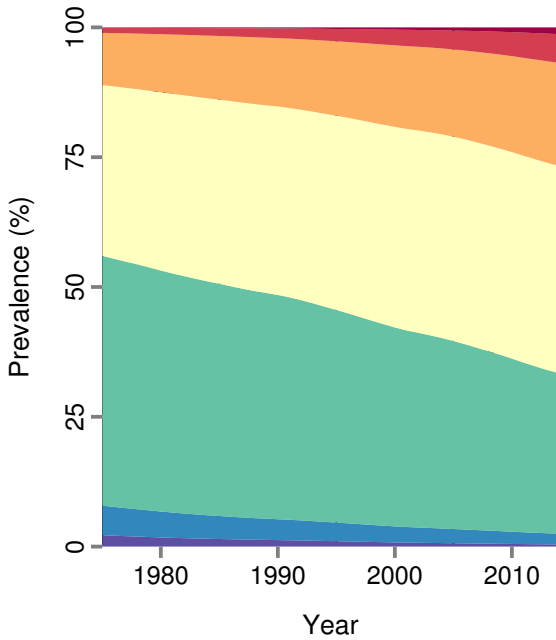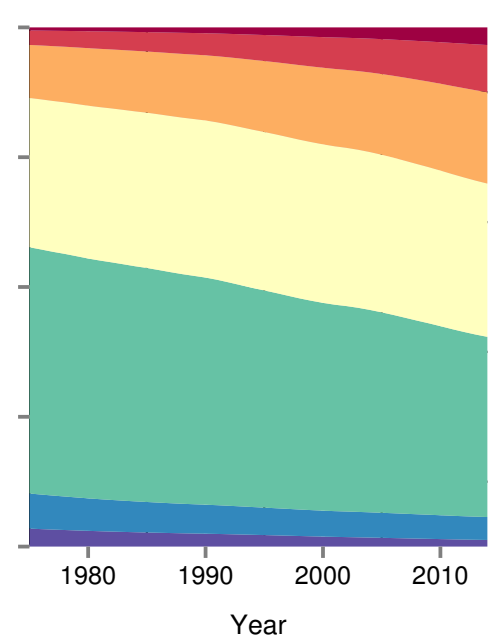

■ BMI <18.5 ■ BMI 18.5-20 ■ BMI 20-25 ■ BMI 25-30 ■ BMI 30-35 ■ BMI 35-40 ■ BMI ≥ 40

Armenia  
Central Asia

Men

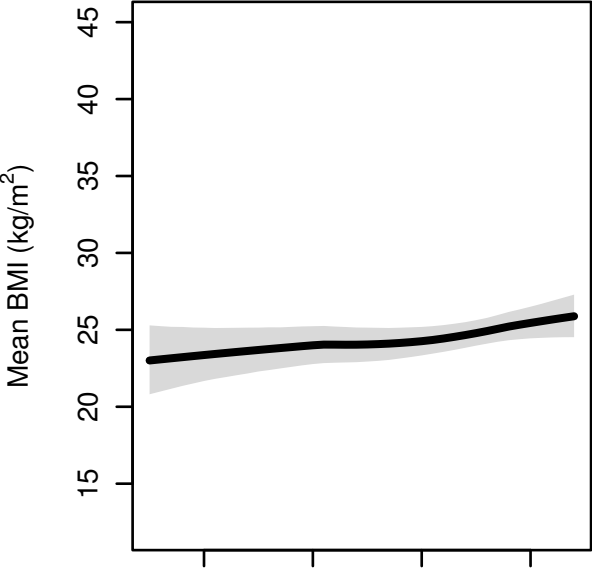

Women

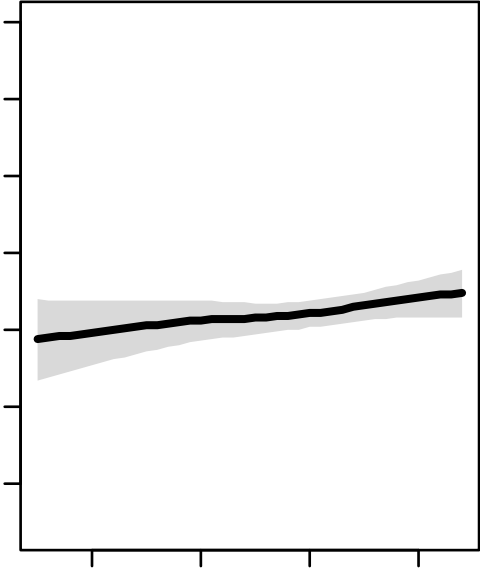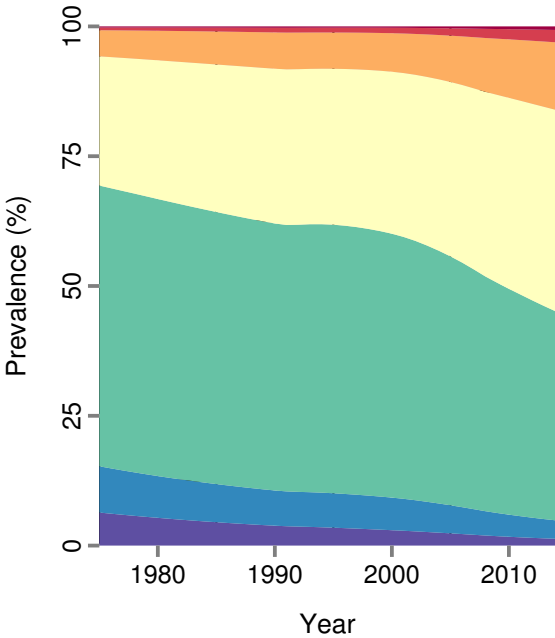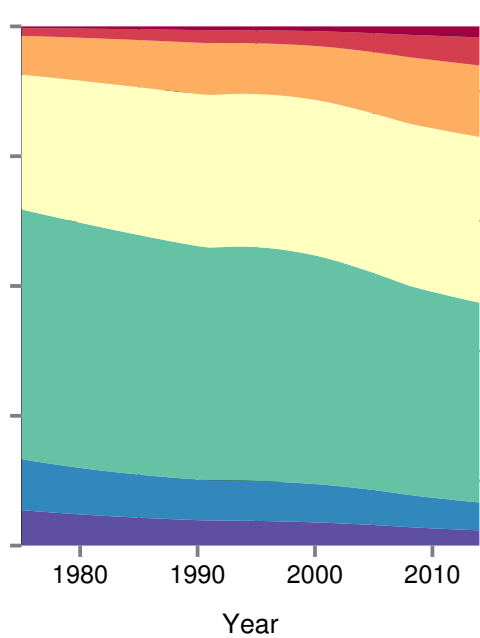

■ BMI <18.5 ■ BMI 18.5-20 ■ BMI 20-25 ■ BMI 25-30 ■ BMI 30-35 ■ BMI 35-40 ■ BMI ≥ 40

Australia  
High-income English-speaking countries

Men

Women

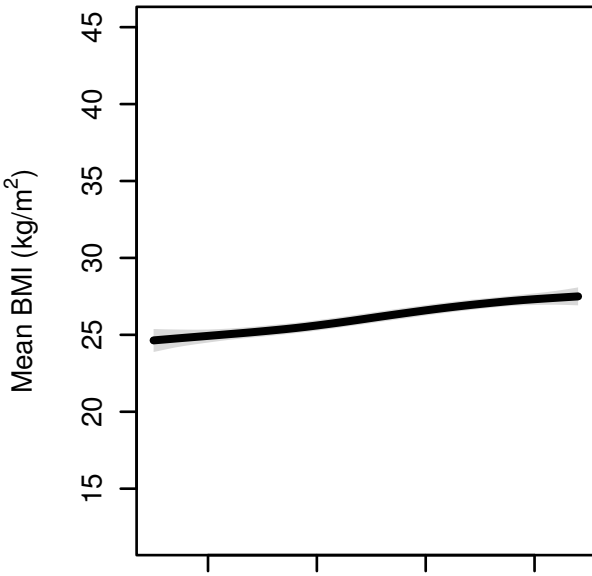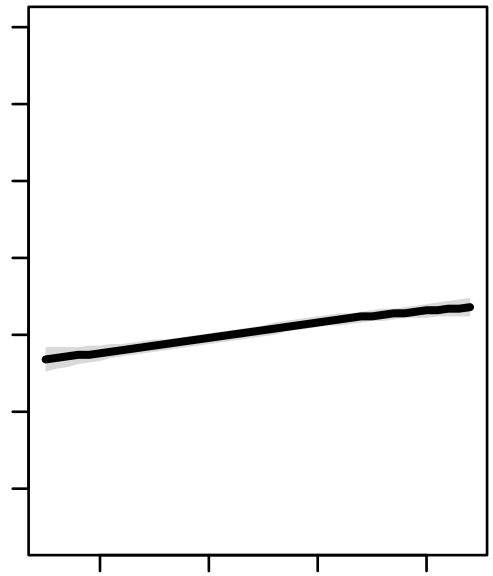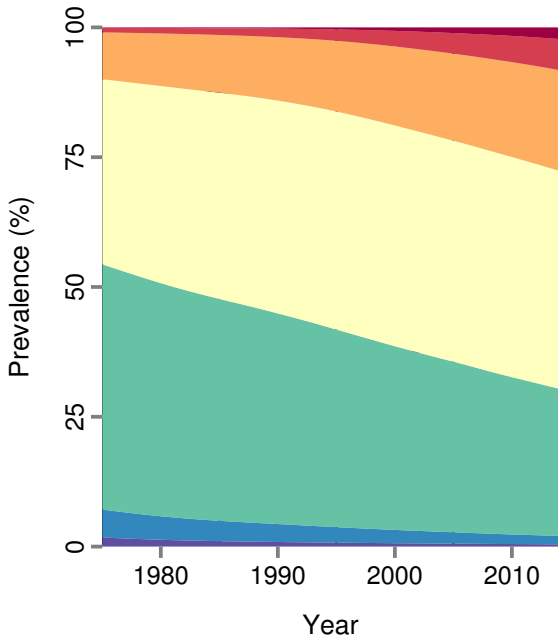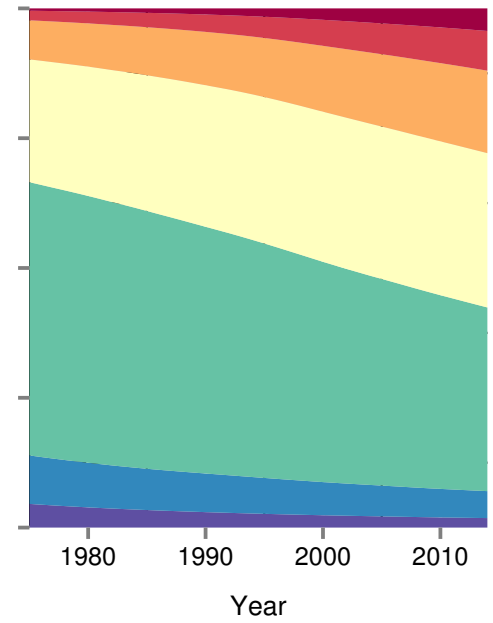

■ BMI <18.5 ■ BMI 18.5-20 ■ BMI 20-25 ■ BMI 25-30 ■ BMI 30-35 ■ BMI 35-40 ■ BMI ≥ 40

Austria  
North Western Europe

Men

Women

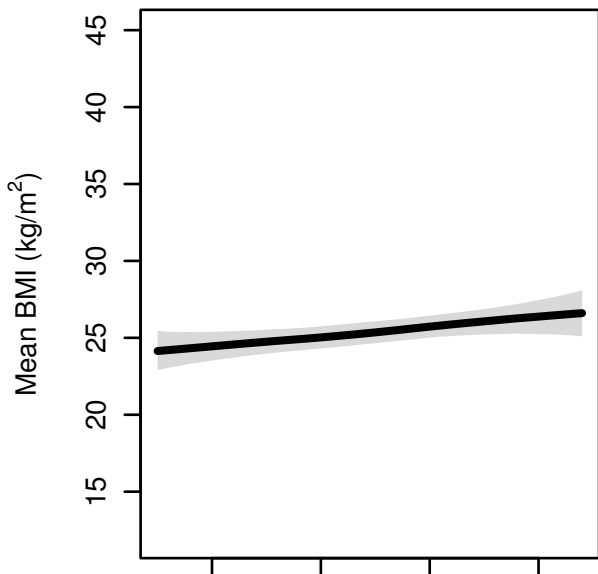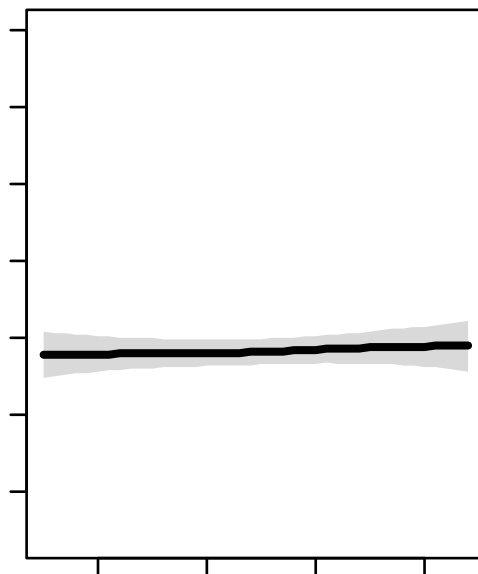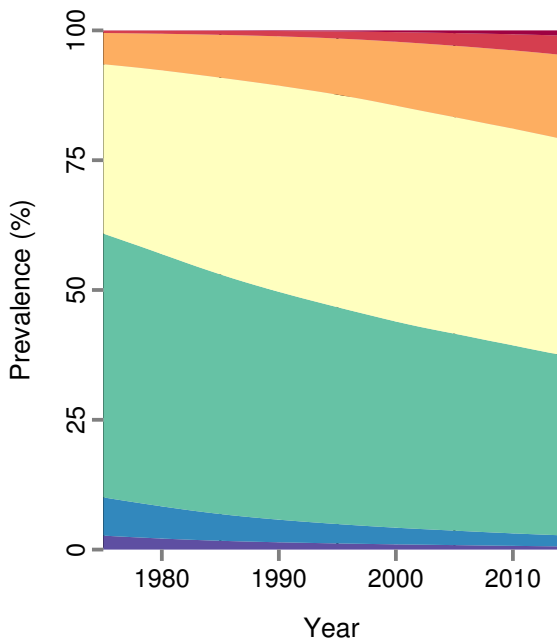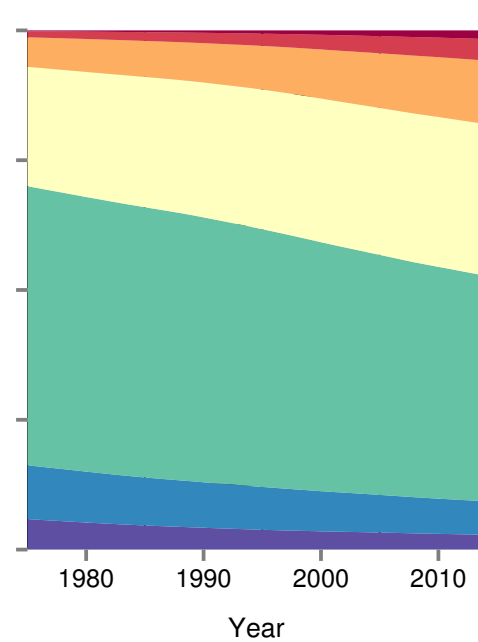

■ BMI <18.5 ■ BMI 18.5-20 ■ BMI 20-25 ■ BMI 25-30 ■ BMI 30-35 ■ BMI 35-40 ■ BMI ≥ 40



Azerbaijan  
Central Asia

Men

Women

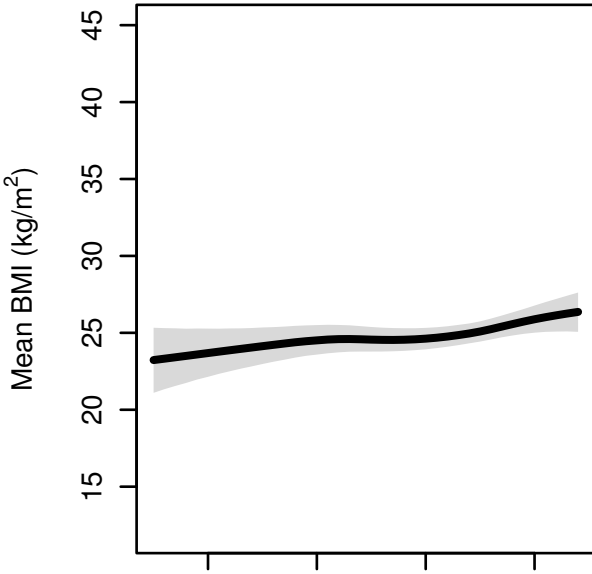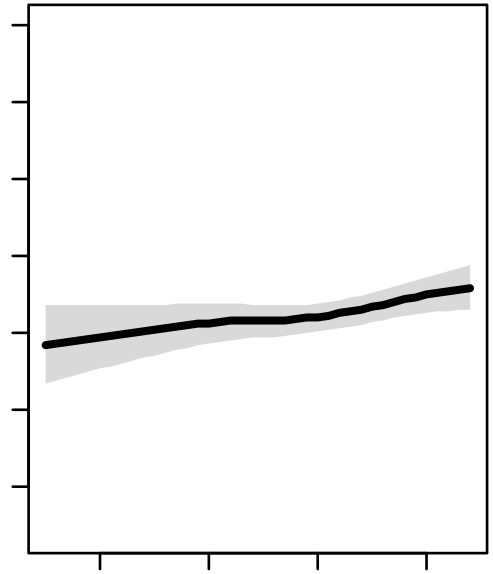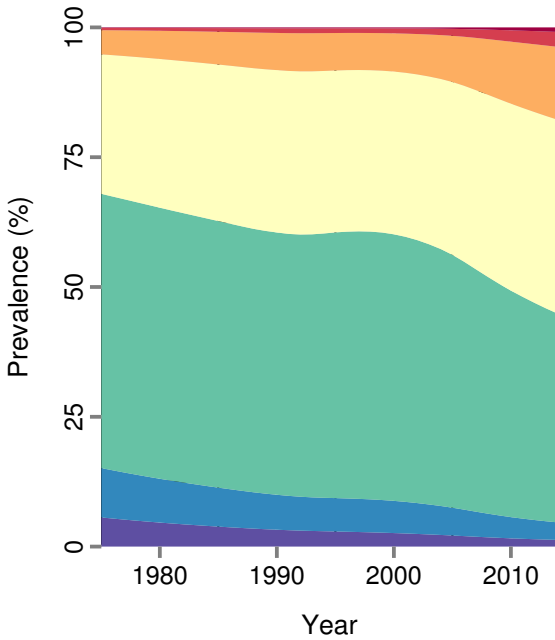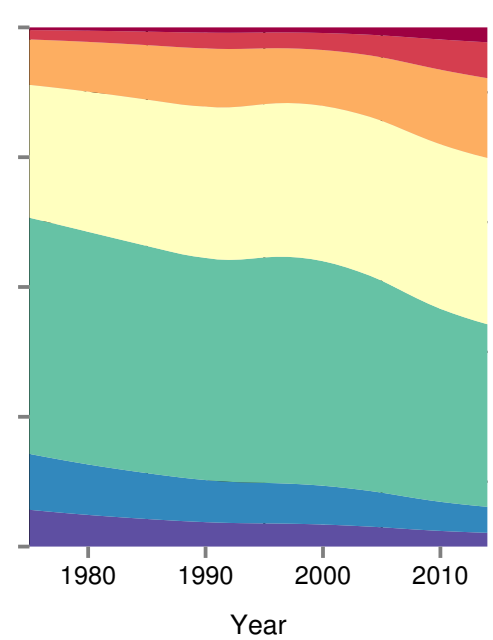

■ BMI <18.5 ■ BMI 18.5-20 ■ BMI 20-25 ■ BMI 25-30 ■ BMI 30-35 ■ BMI 35-40 ■ BMI ≥ 40

Bahamas  
Caribbean

Men

Women

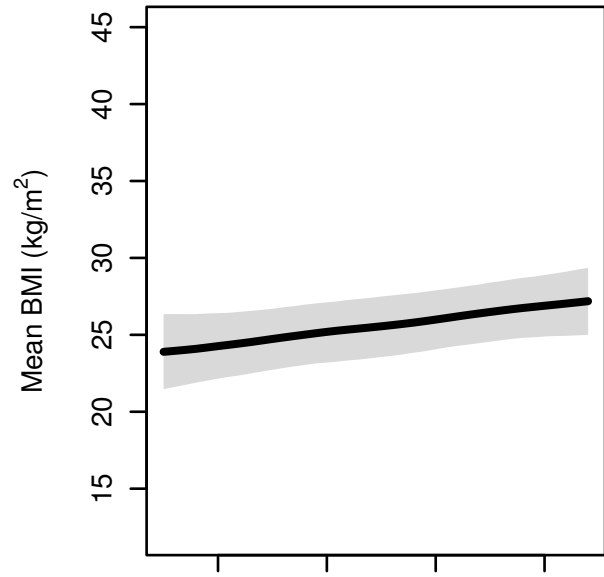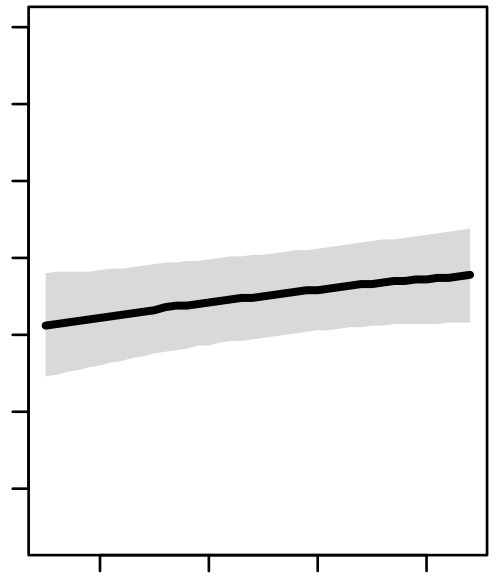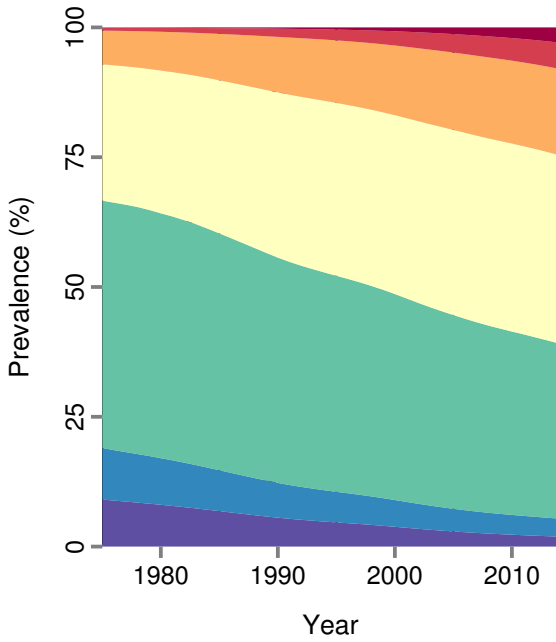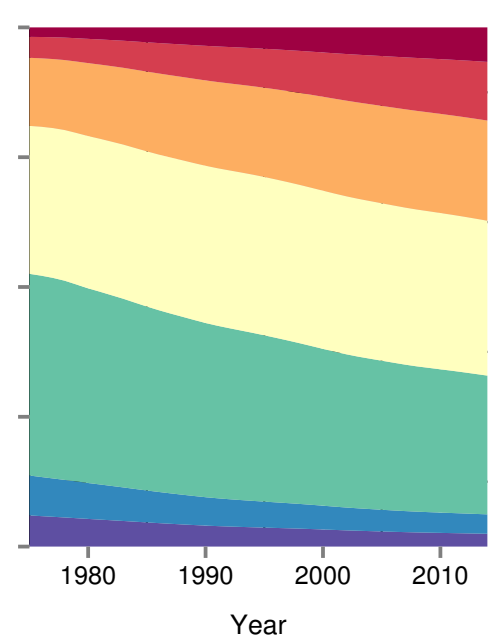

■ BMI <18.5 ■ BMI 18.5-20 ■ BMI 20-25 ■ BMI 25-30 ■ BMI 30-35 ■ BMI 35-40 ■ BMI ≥ 40

# Bahrain

## Middle East and North Africa

### Men

### Women

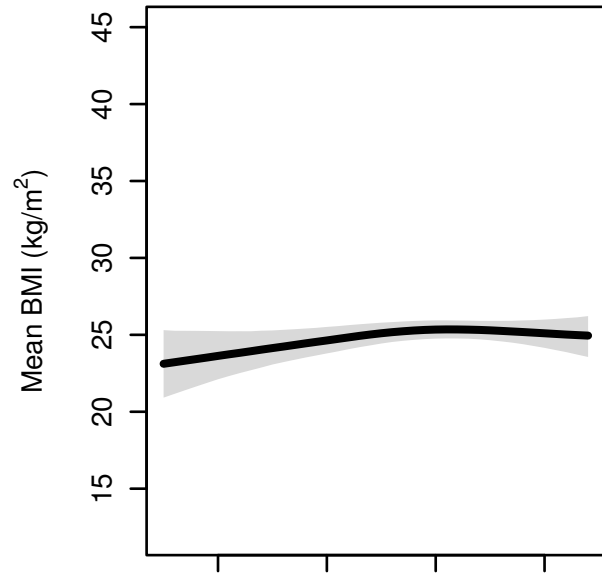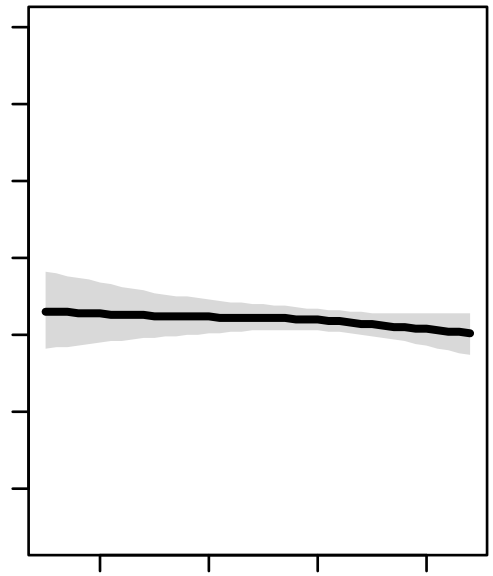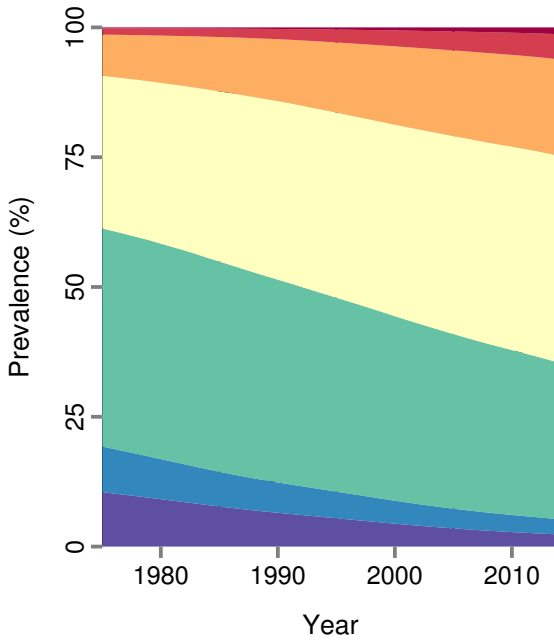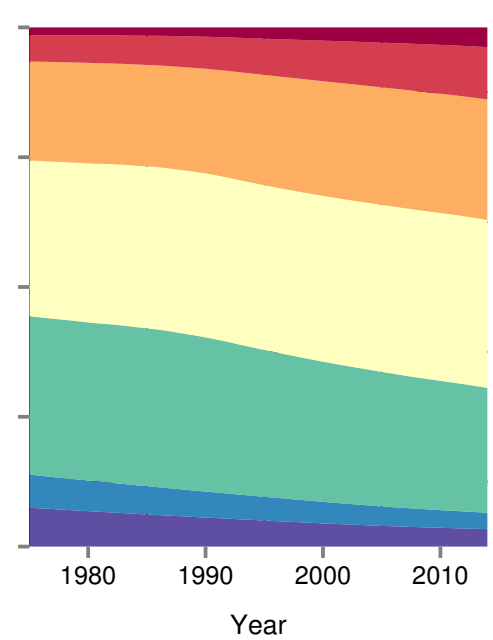

■ BMI <18.5 ■ BMI 18.5-20 ■ BMI 20-25 ■ BMI 25-30 ■ BMI 30-35 ■ BMI 35-40 ■ BMI ≥ 40

Bangladesh  
South Asia

Men

Women

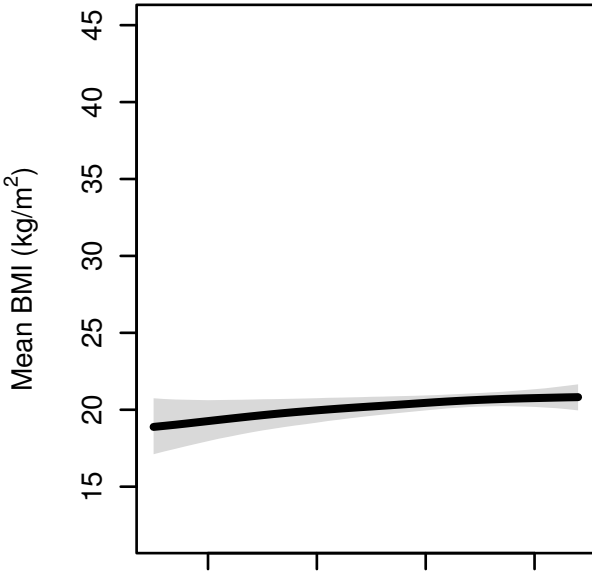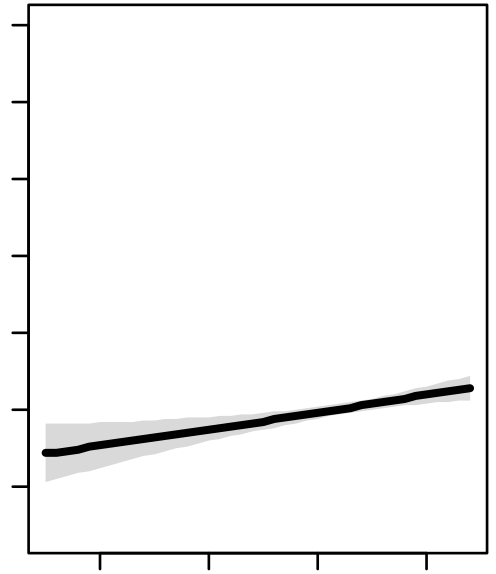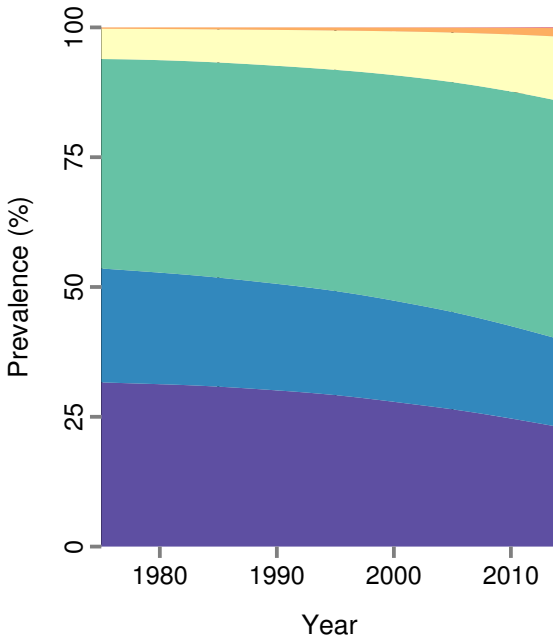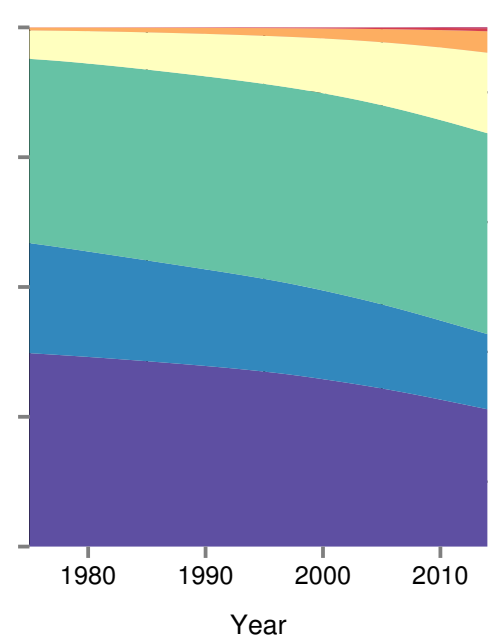

■ BMI <18.5 ■ BMI 18.5-20 ■ BMI 20-25 ■ BMI 25-30 ■ BMI 30-35 ■ BMI 35-40 ■ BMI ≥ 40

Barbados  
Caribbean

Men

Women

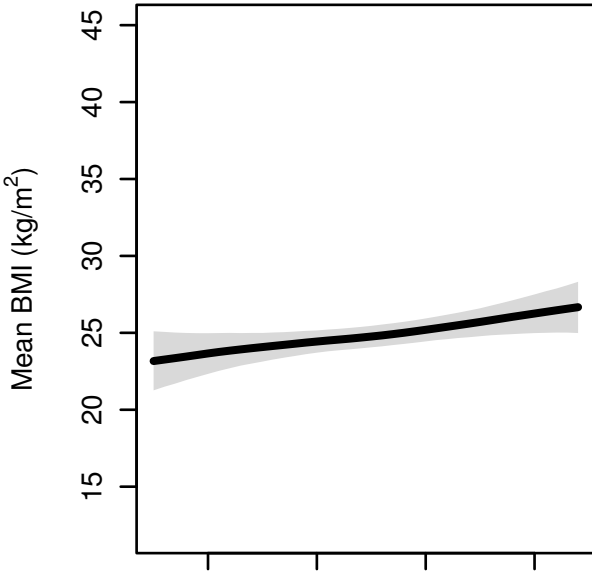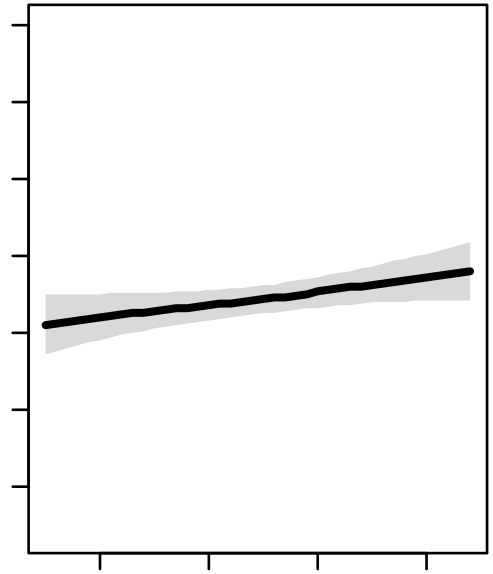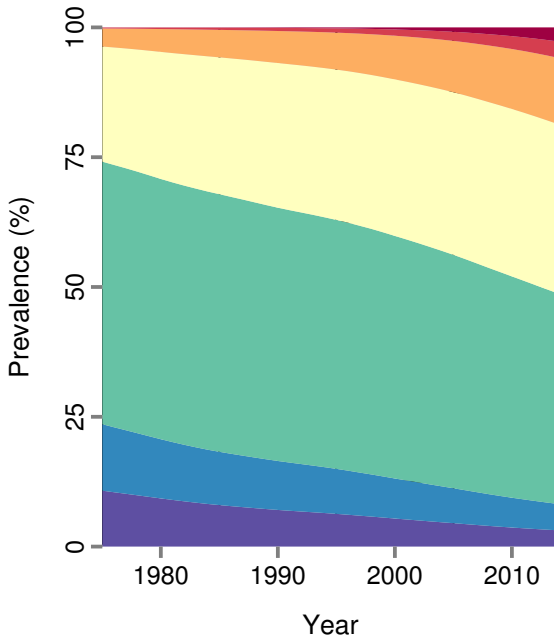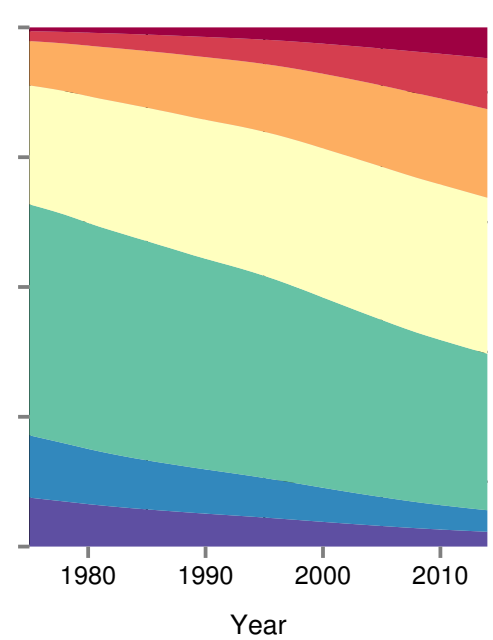

■ BMI <18.5 ■ BMI 18.5-20 ■ BMI 20-25 ■ BMI 25-30 ■ BMI 30-35 ■ BMI 35-40 ■ BMI ≥ 40

Belarus  
Eastern Europe

Men

Women

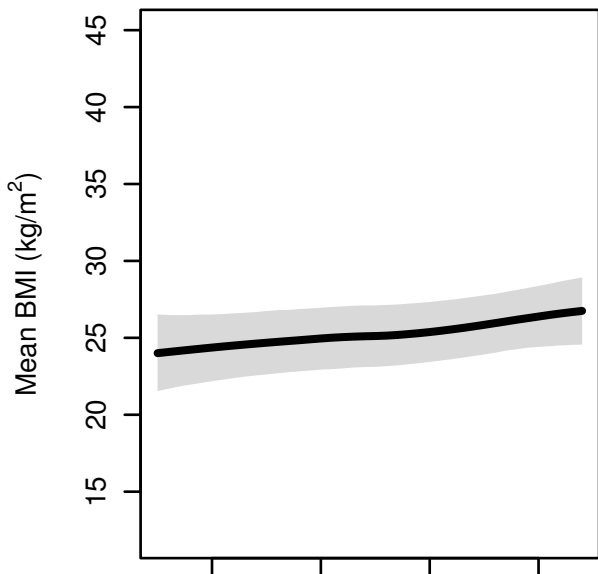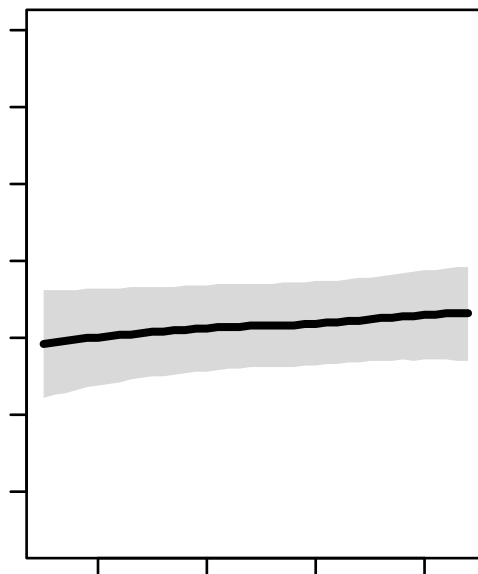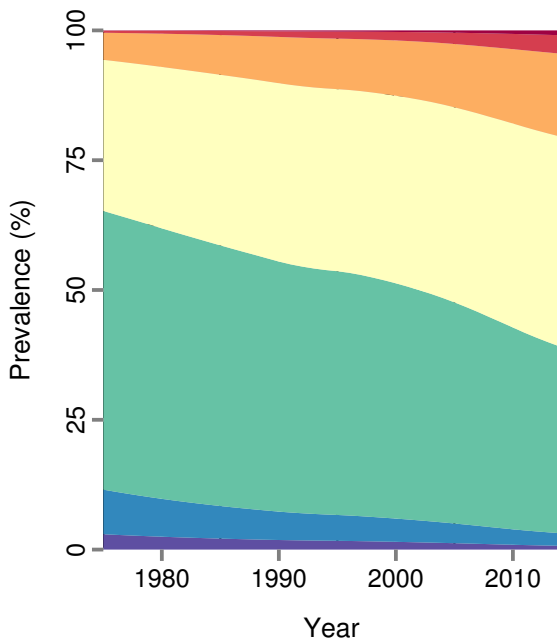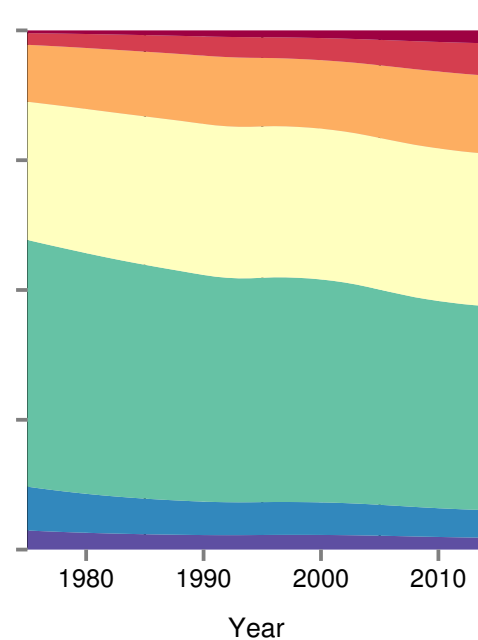

■ BMI <18.5 ■ BMI 18.5-20 ■ BMI 20-25 ■ BMI 25-30 ■ BMI 30-35 ■ BMI 35-40 ■ BMI ≥ 40

Belgium  
North Western Europe

Men

Women

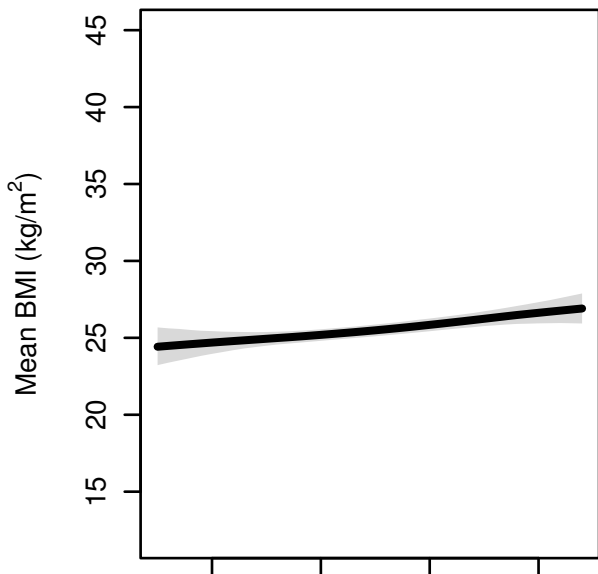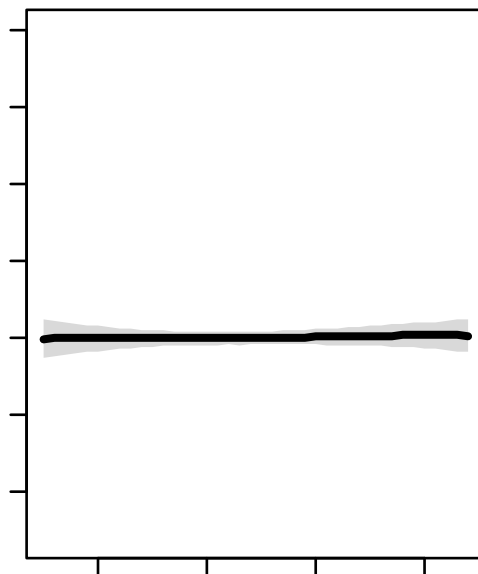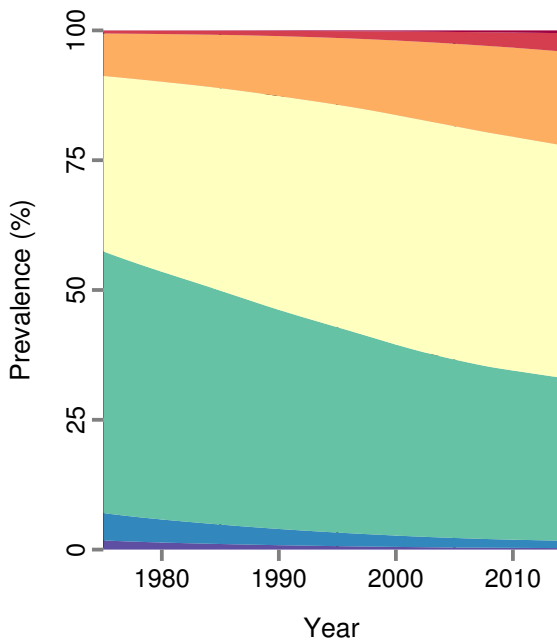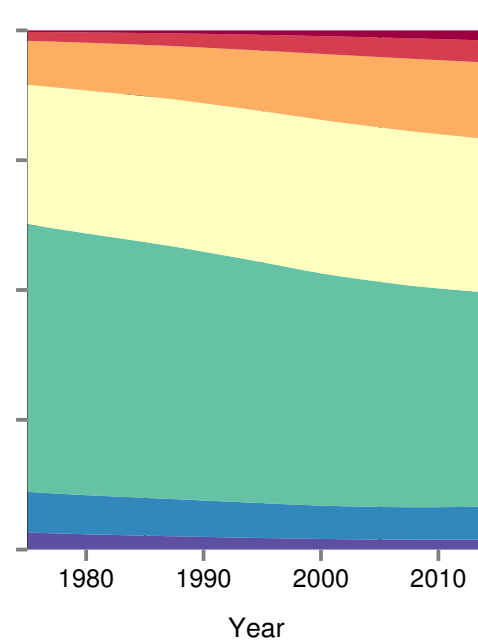

■ BMI <18.5 ■ BMI 18.5-20 ■ BMI 20-25 ■ BMI 25-30 ■ BMI 30-35 ■ BMI 35-40 ■ BMI ≥ 40

Belize  
Caribbean

Men

Women

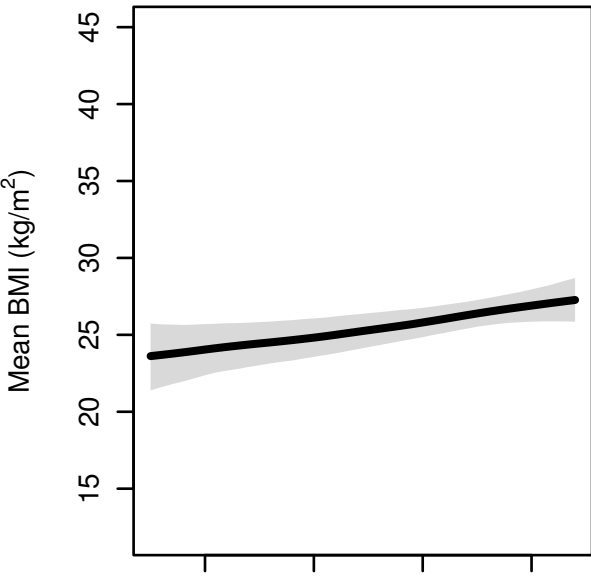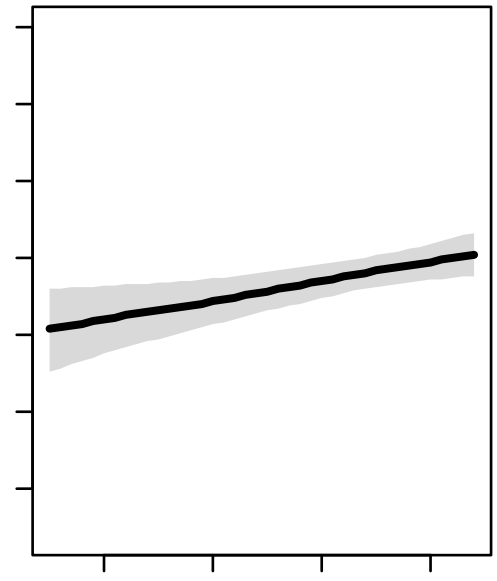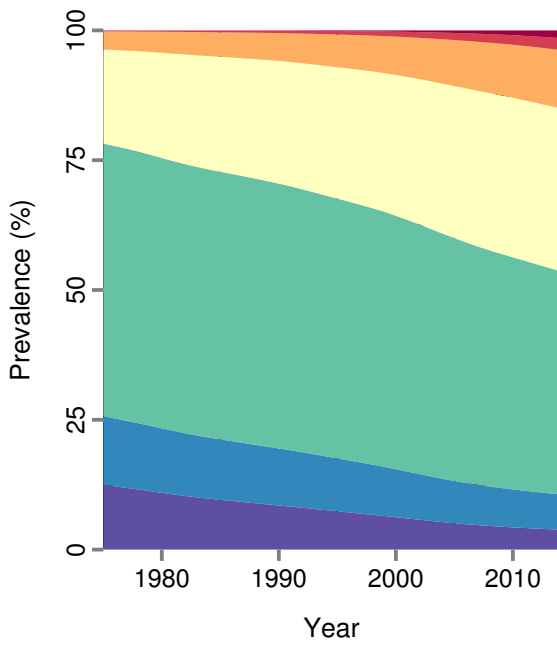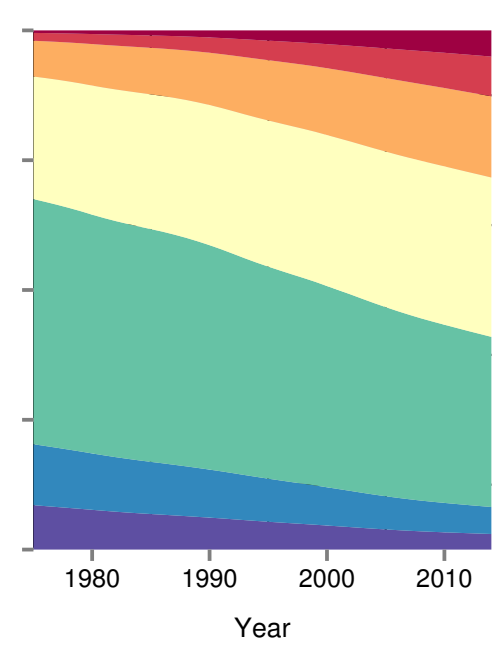

■ BMI <18.5 ■ BMI 18.5-20 ■ BMI 20-25 ■ BMI 25-30 ■ BMI 30-35 ■ BMI 35-40 ■ BMI ≥ 40



Benin  
West Africa

Men

Women

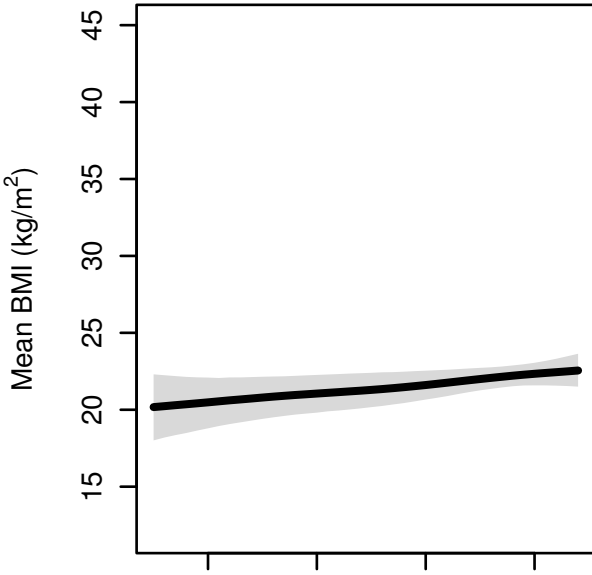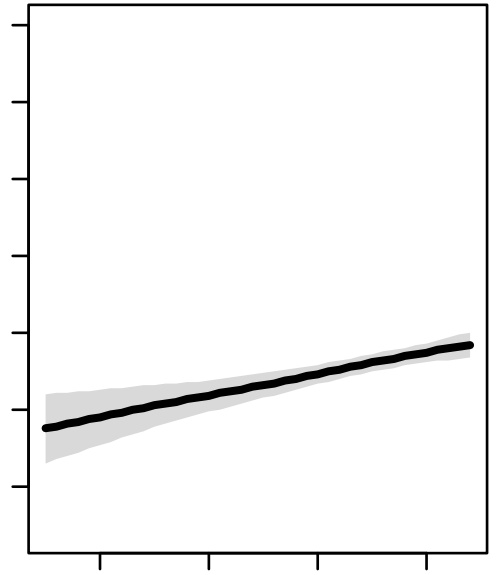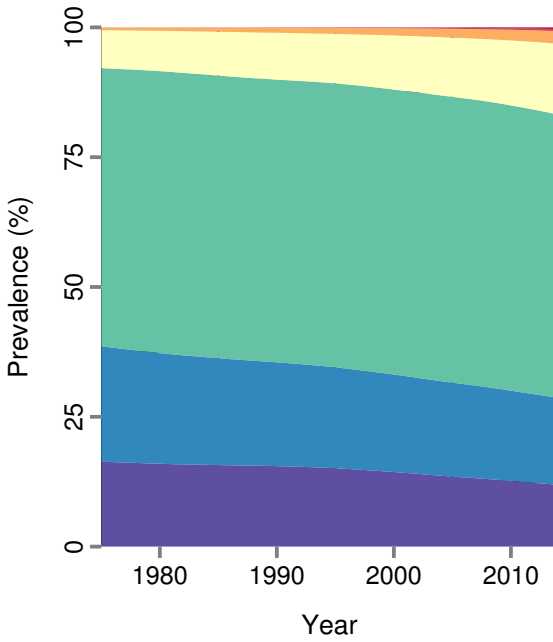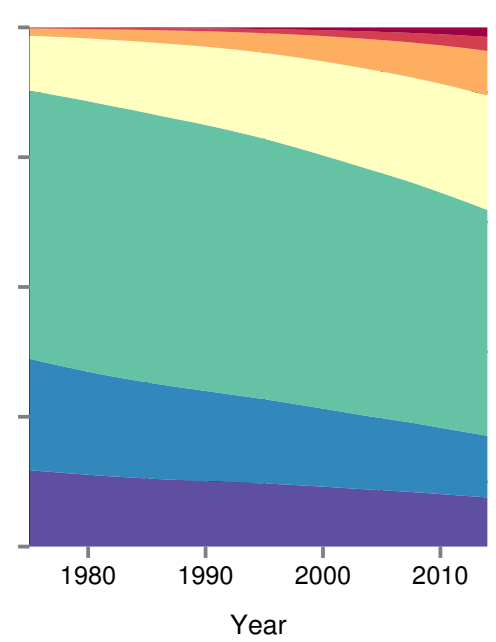

■ BMI <18.5 ■ BMI 18.5-20 ■ BMI 20-25 ■ BMI 25-30 ■ BMI 30-35 ■ BMI 35-40 ■ BMI ≥ 40

Bermuda  
Caribbean

Men

Women

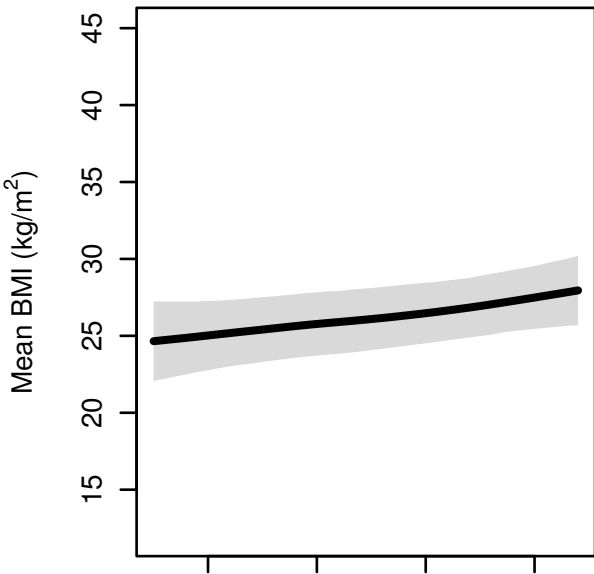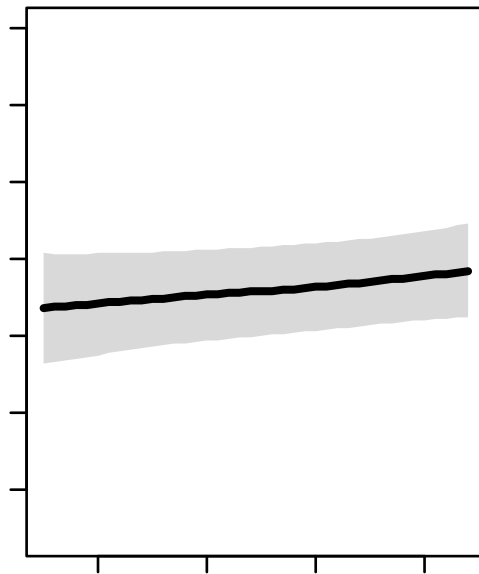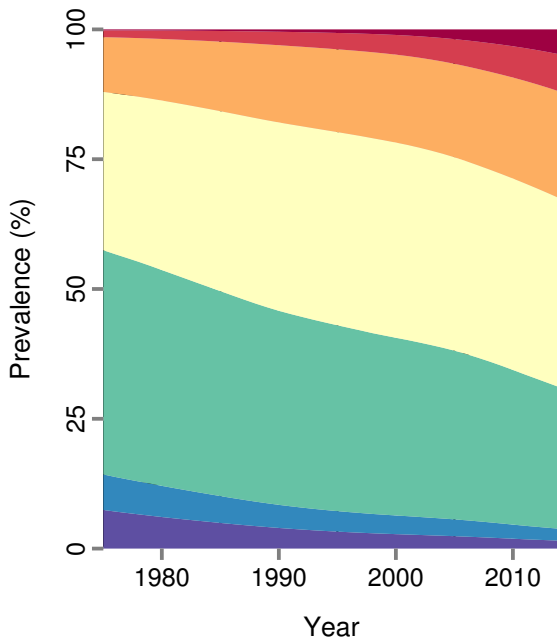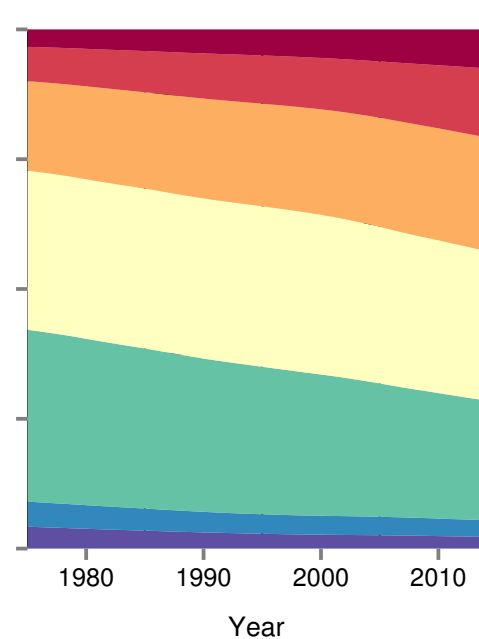

■ BMI <18.5 ■ BMI 18.5-20 ■ BMI 20-25 ■ BMI 25-30 ■ BMI 30-35 ■ BMI 35-40 ■ BMI ≥ 40

Bhutan  
South Asia

Men

Women

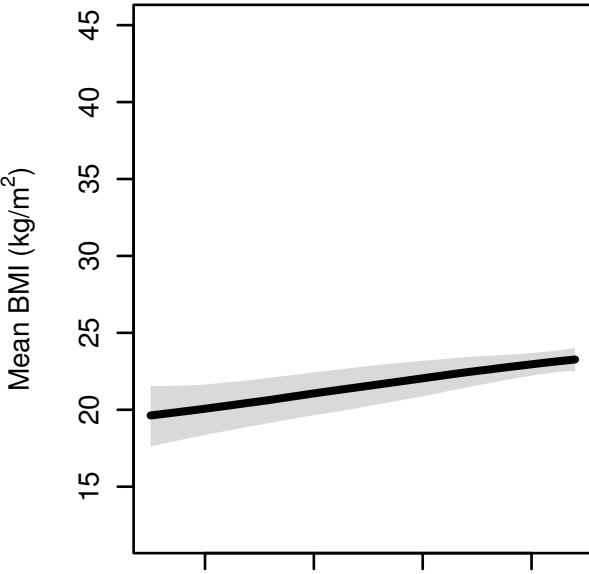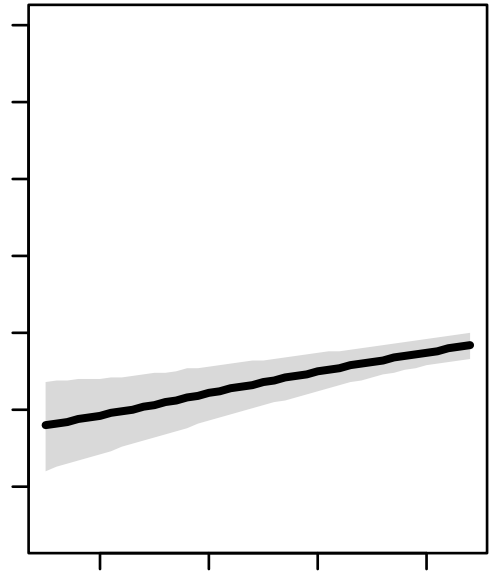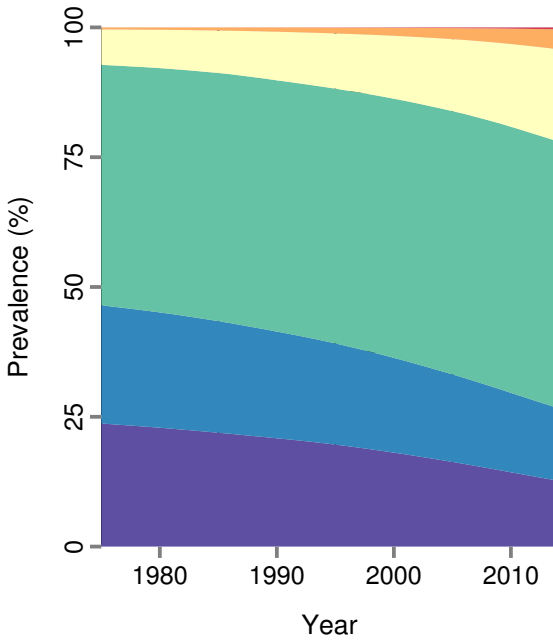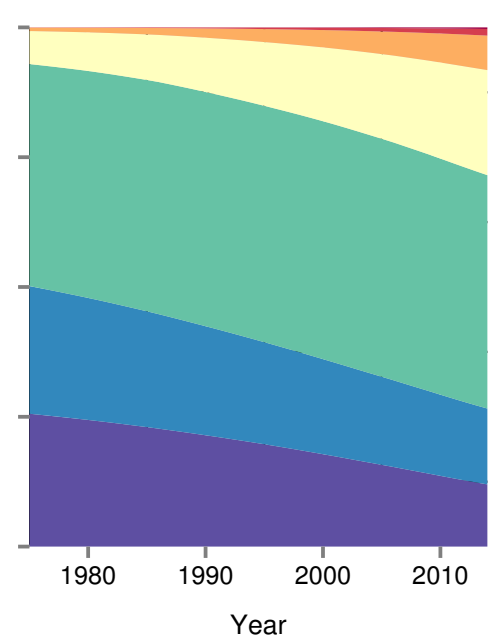

■ BMI <18.5 ■ BMI 18.5-20 ■ BMI 20-25 ■ BMI 25-30 ■ BMI 30-35 ■ BMI 35-40 ■ BMI ≥ 40

Bolivia  
Andean Latin America

Men

Women

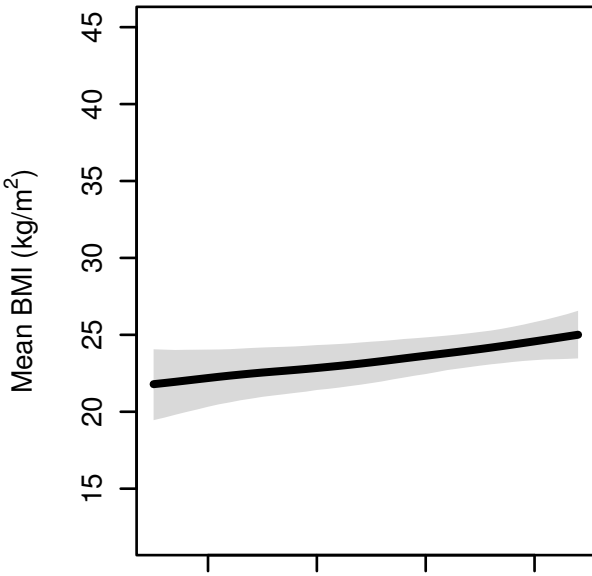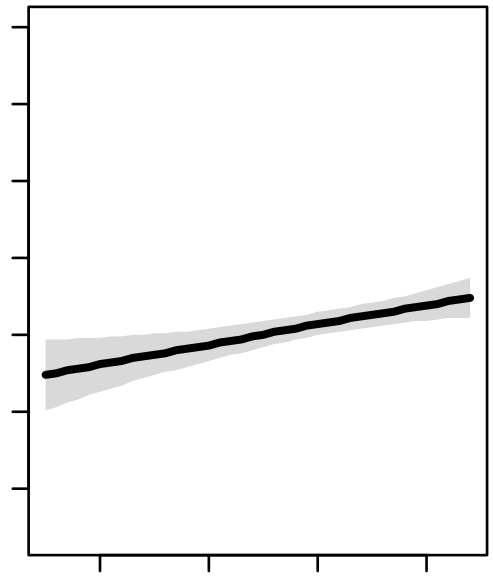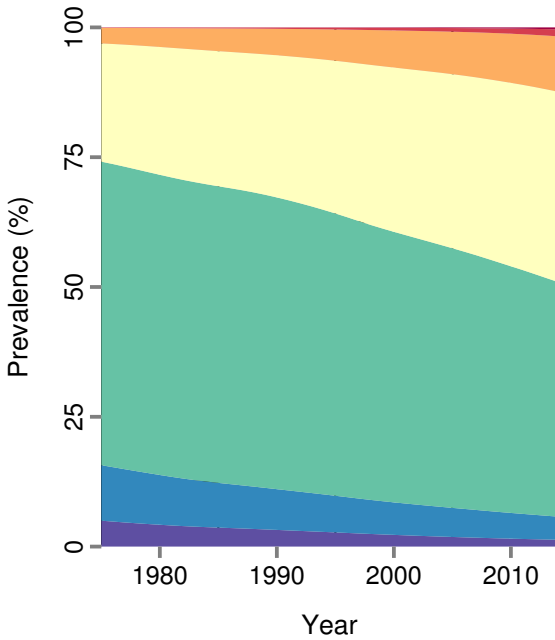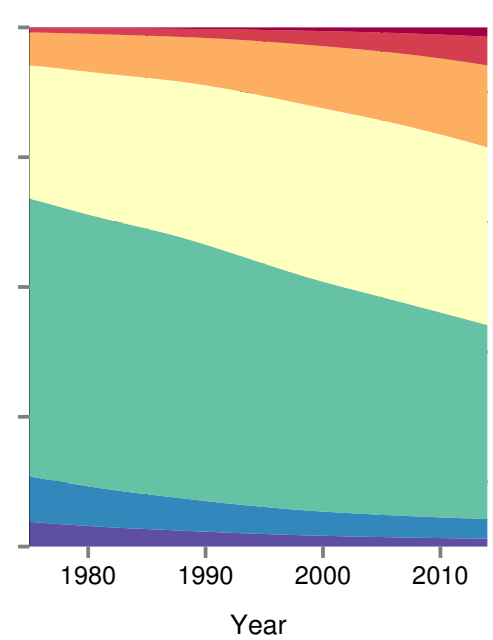

■ BMI <18.5 ■ BMI 18.5-20 ■ BMI 20-25 ■ BMI 25-30 ■ BMI 30-35 ■ BMI 35-40 ■ BMI ≥ 40

# Bosnia and Herzegovina

## Central Europe

### Men

### Women

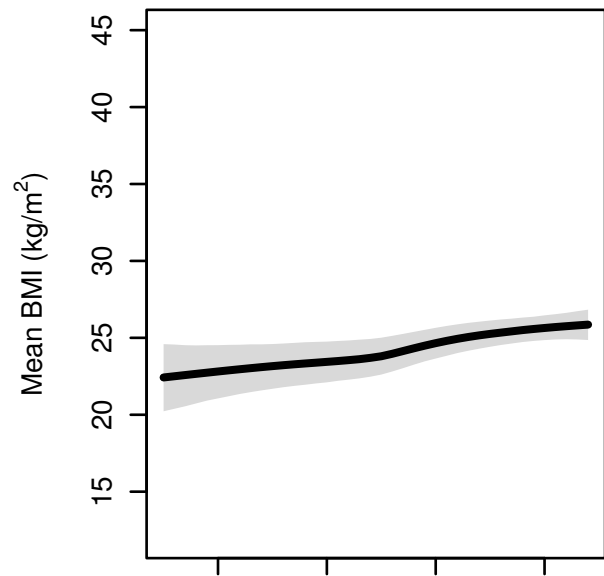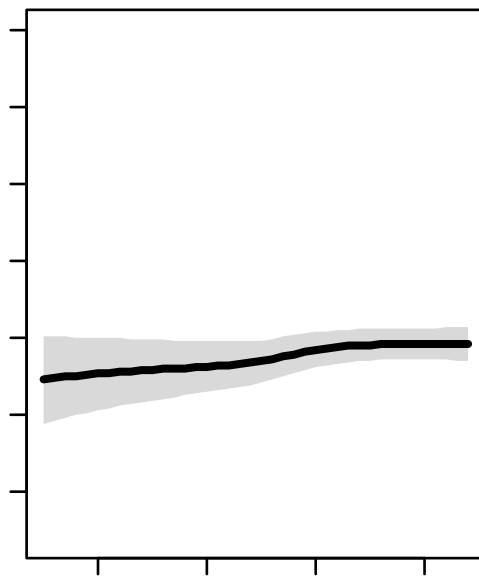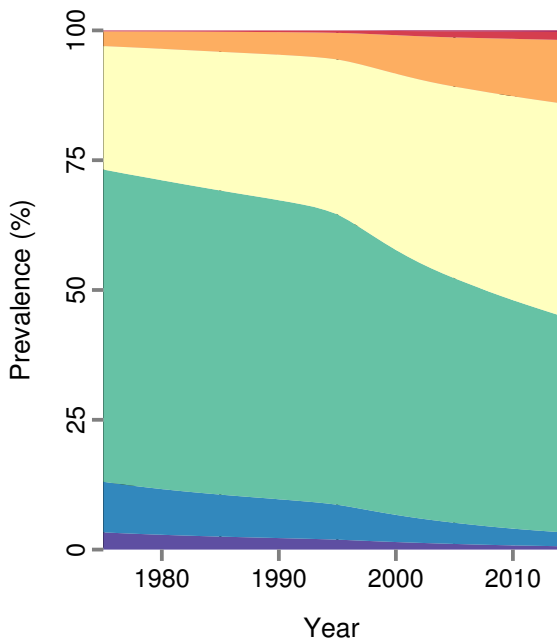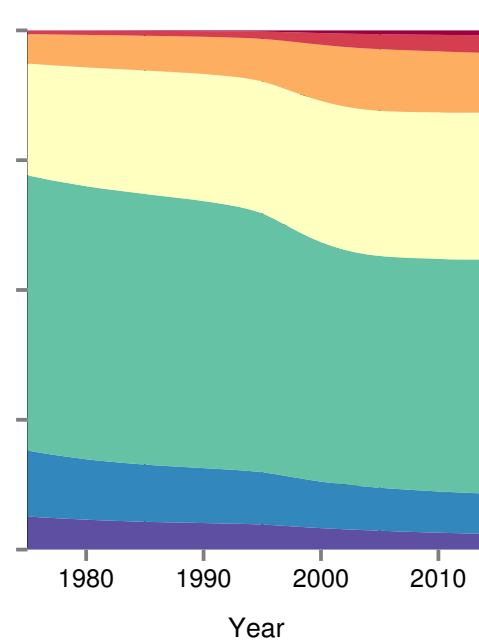

■ BMI <18.5 ■ BMI 18.5-20 ■ BMI 20-25 ■ BMI 25-30 ■ BMI 30-35 ■ BMI 35-40 ■ BMI ≥ 40

Botswana  
Southern Africa

Men

Women

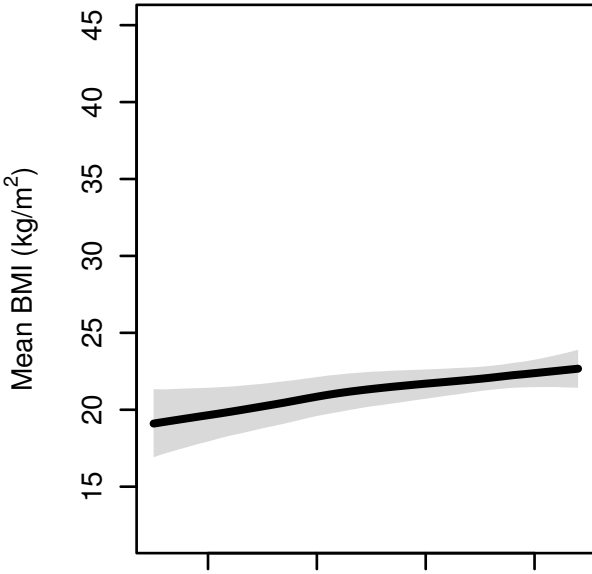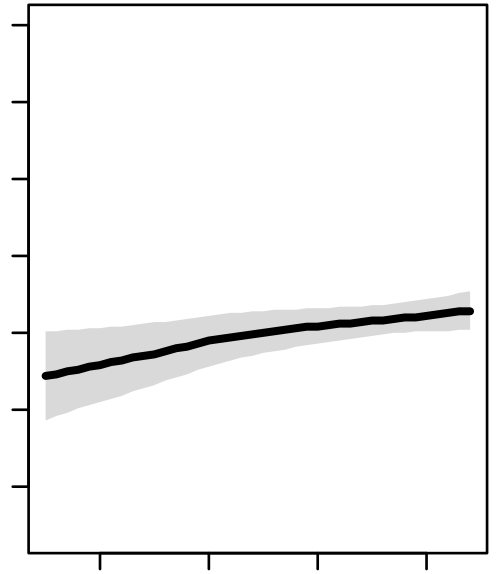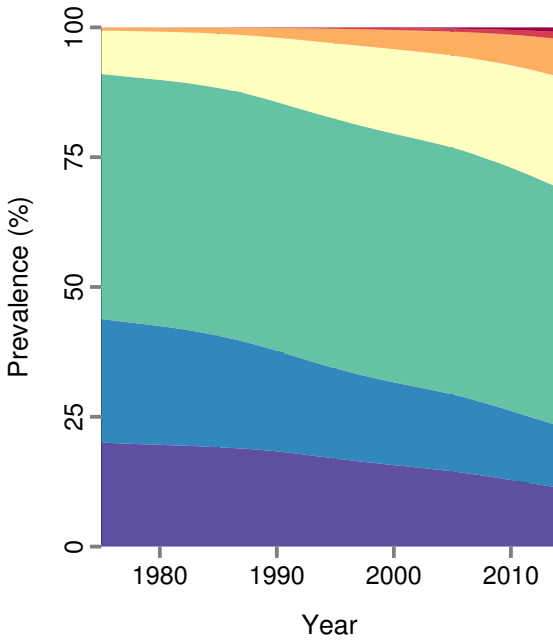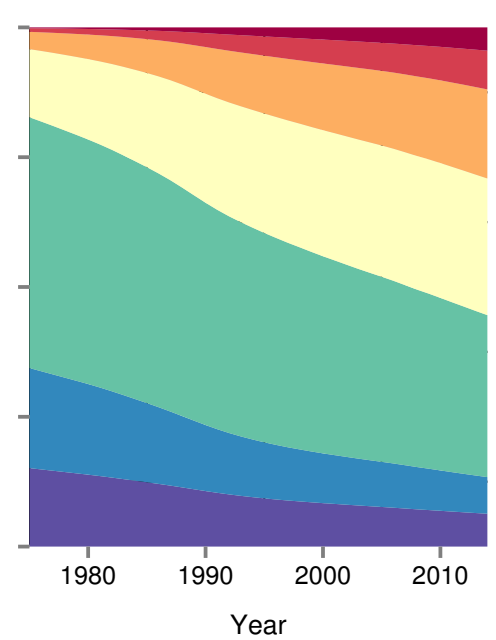

■ BMI <18.5 ■ BMI 18.5-20 ■ BMI 20-25 ■ BMI 25-30 ■ BMI 30-35 ■ BMI 35-40 ■ BMI ≥ 40

Brazil  
Southern Latin America

Men

Women

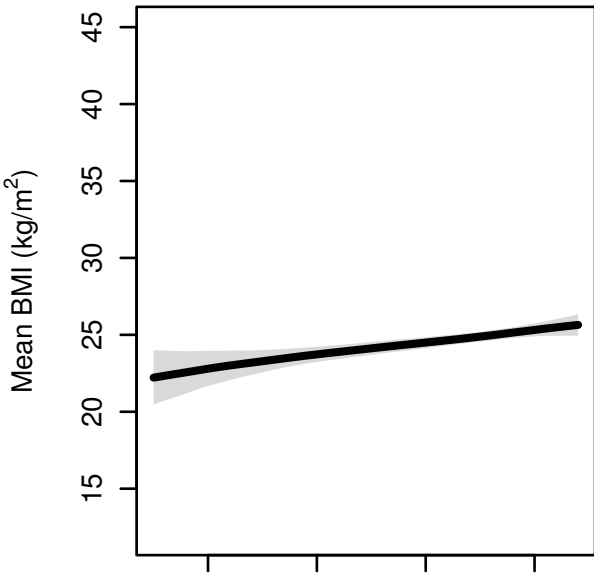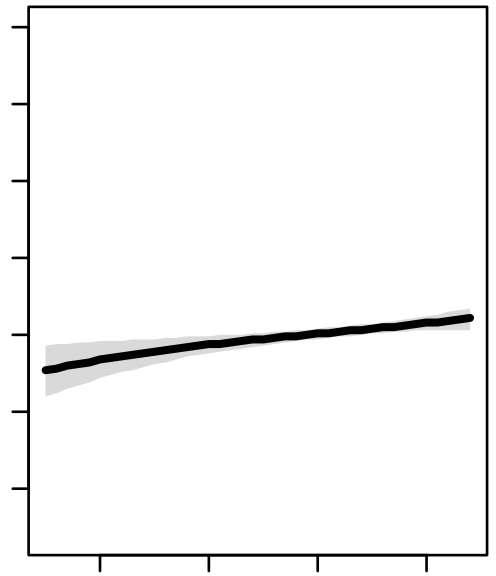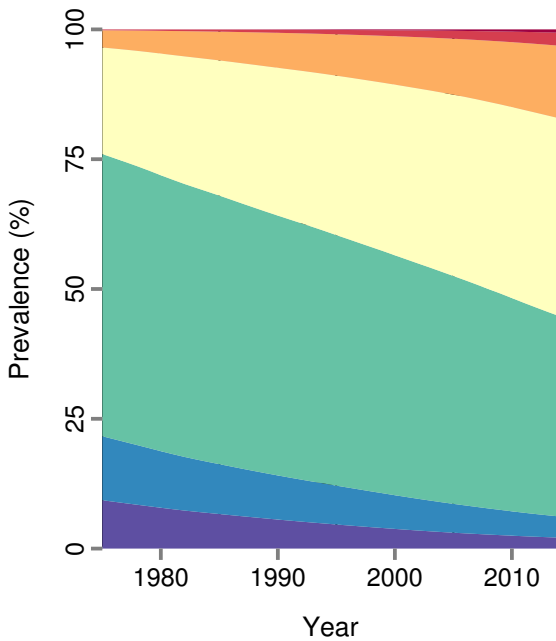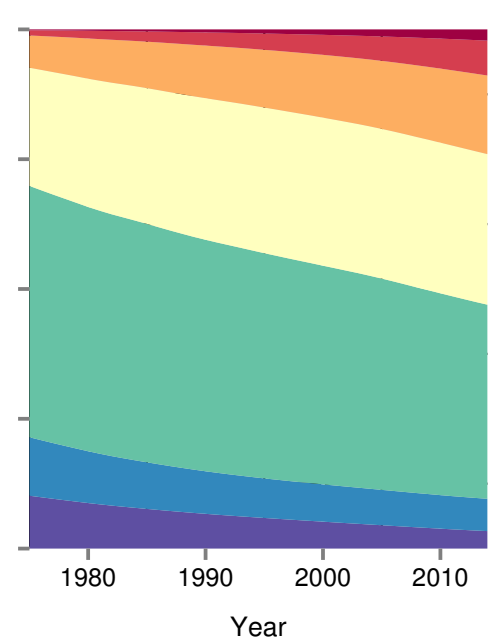

■ BMI <18.5 ■ BMI 18.5-20 ■ BMI 20-25 ■ BMI 25-30 ■ BMI 30-35 ■ BMI 35-40 ■ BMI ≥ 40

Brunei Darussalam  
South East Asia

Men

Women

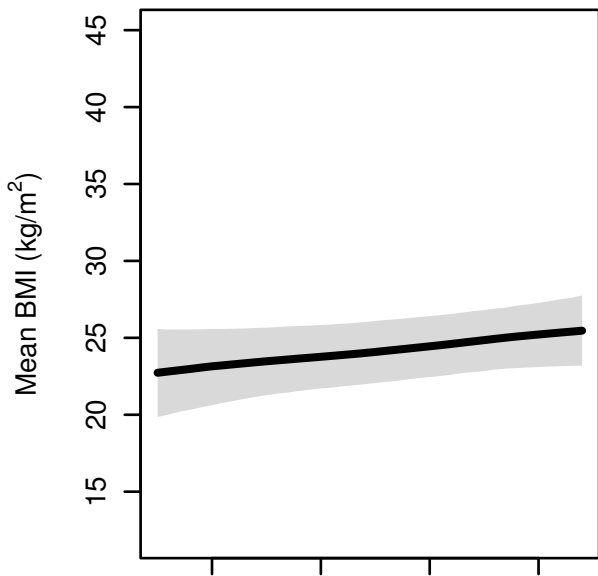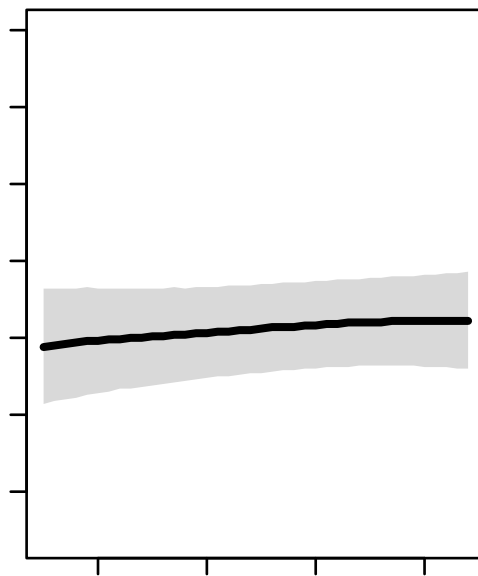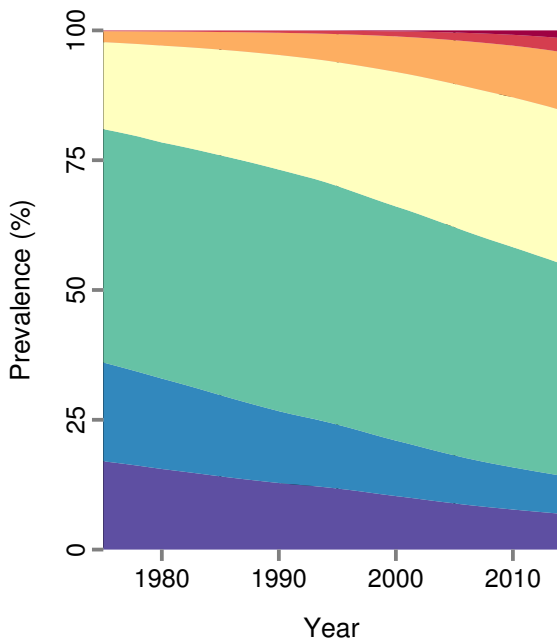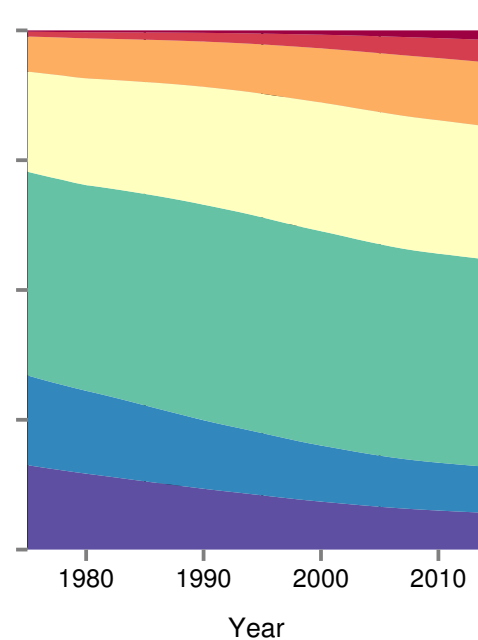

■ BMI <18.5 ■ BMI 18.5-20 ■ BMI 20-25 ■ BMI 25-30 ■ BMI 30-35 ■ BMI 35-40 ■ BMI ≥ 40



Bulgaria  
Central Europe

Men

Women

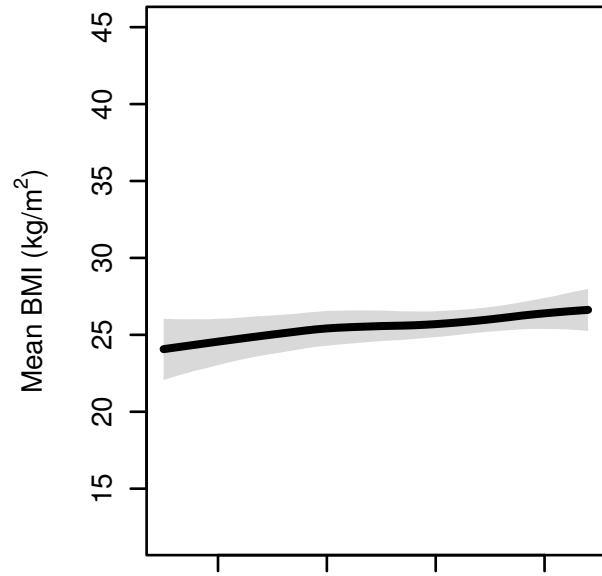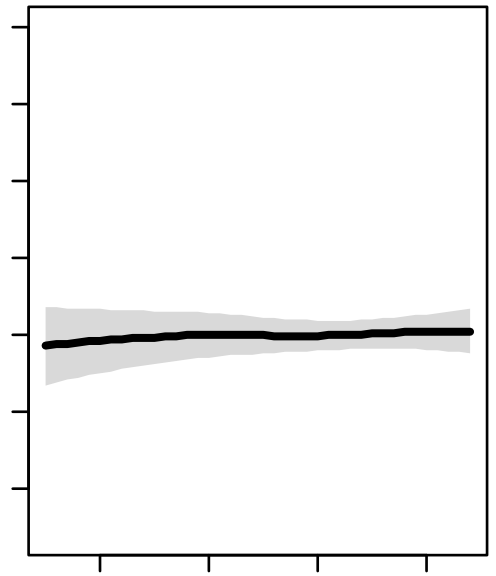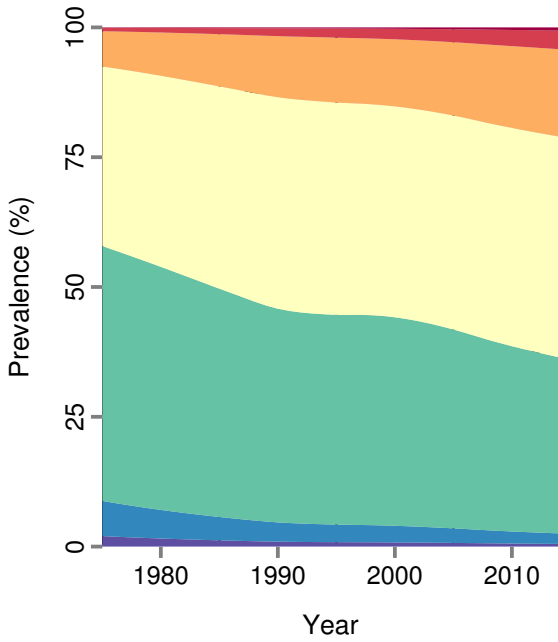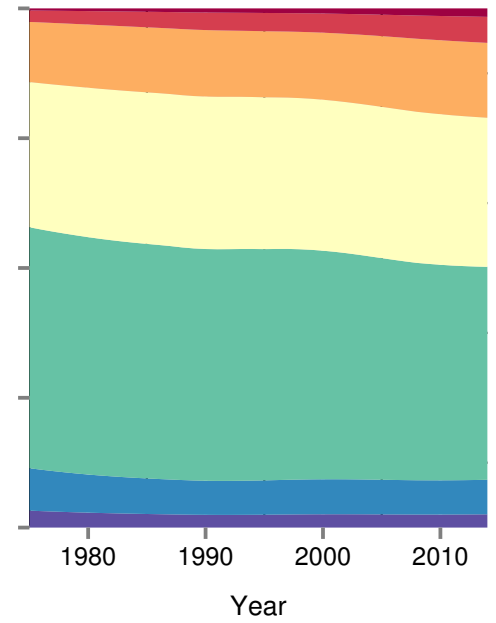

■ BMI <18.5 ■ BMI 18.5-20 ■ BMI 20-25 ■ BMI 25-30 ■ BMI 30-35 ■ BMI 35-40 ■ BMI ≥ 40

Burkina Faso  
West Africa

Men

Women

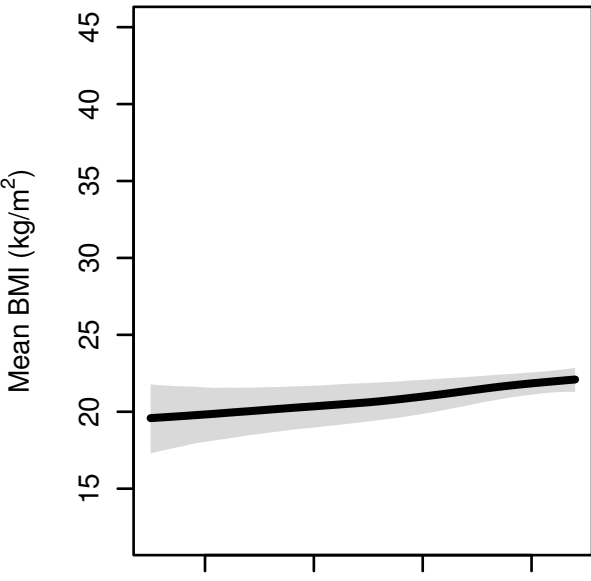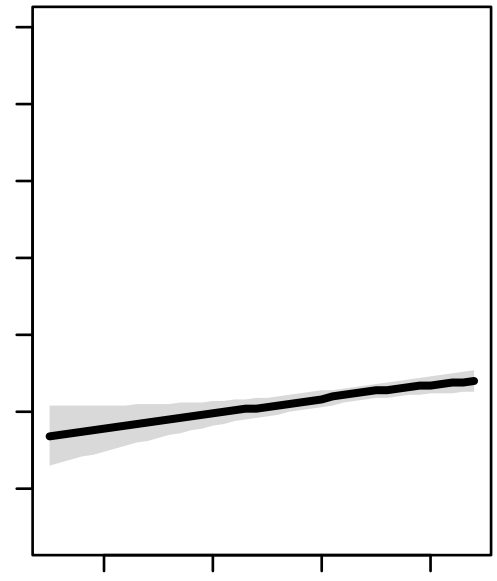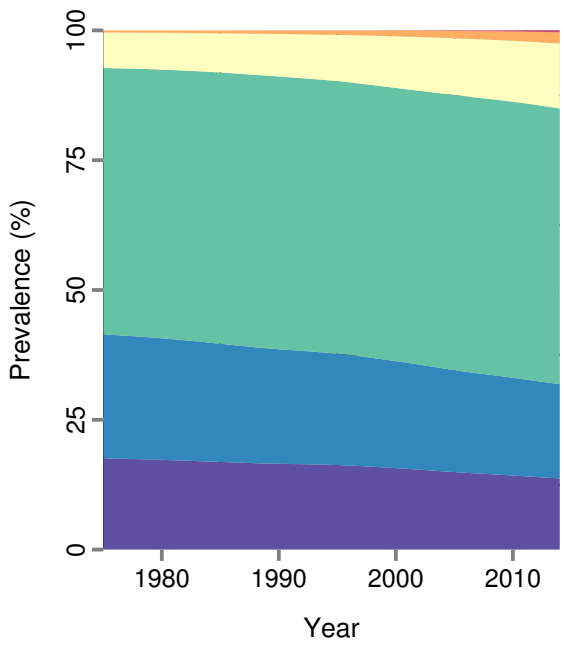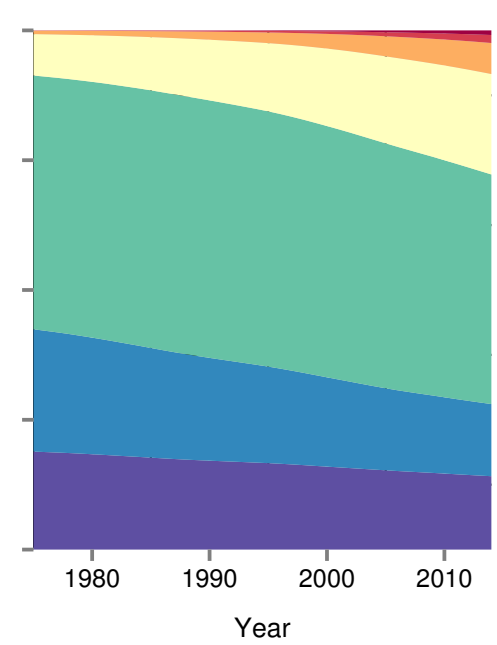

■ BMI <18.5 ■ BMI 18.5-20 ■ BMI 20-25 ■ BMI 25-30 ■ BMI 30-35 ■ BMI 35-40 ■ BMI ≥ 40

Burundi  
East Africa

Men

Women

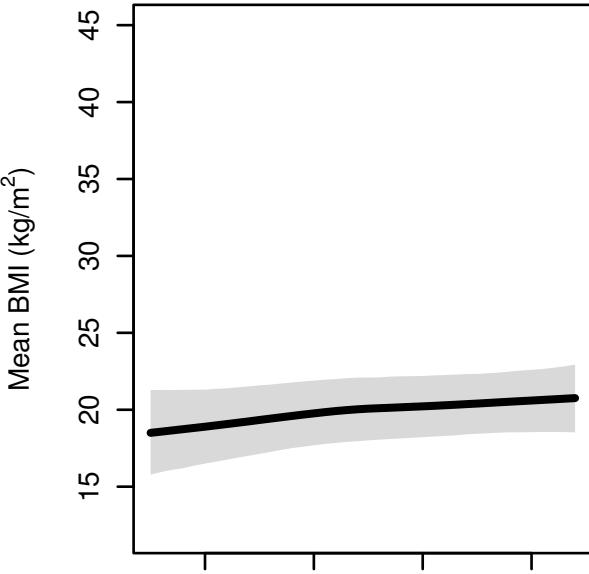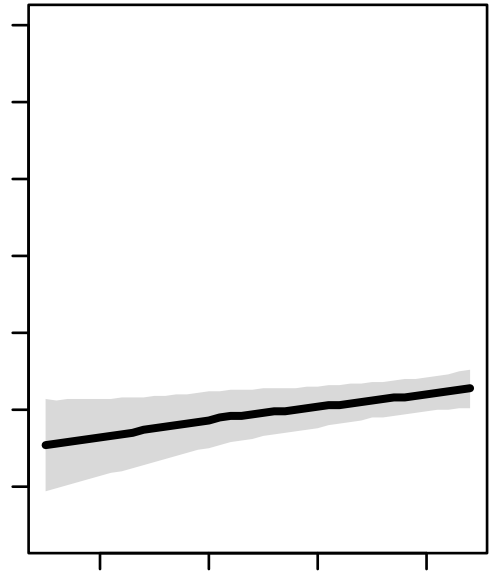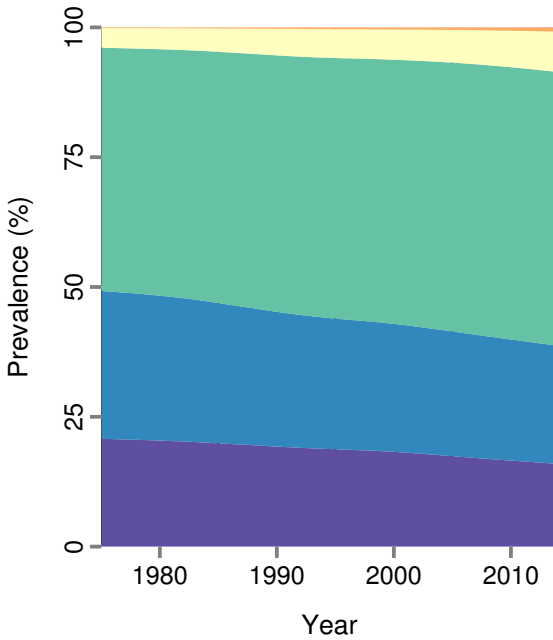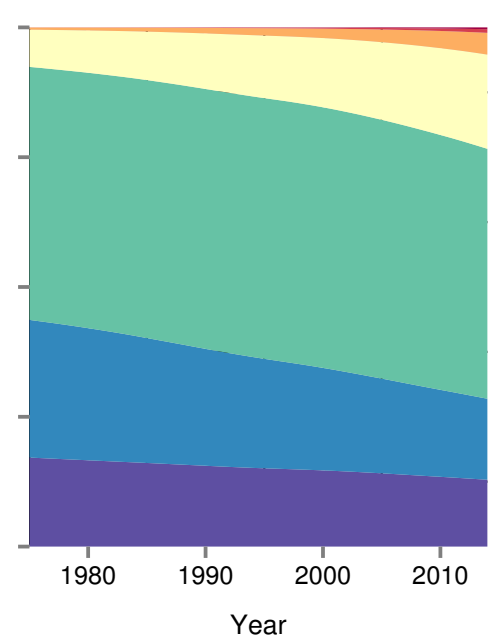

■ BMI <18.5 ■ BMI 18.5-20 ■ BMI 20-25 ■ BMI 25-30 ■ BMI 30-35 ■ BMI 35-40 ■ BMI ≥ 40

# Cabo Verde West Africa

## Men

## Women

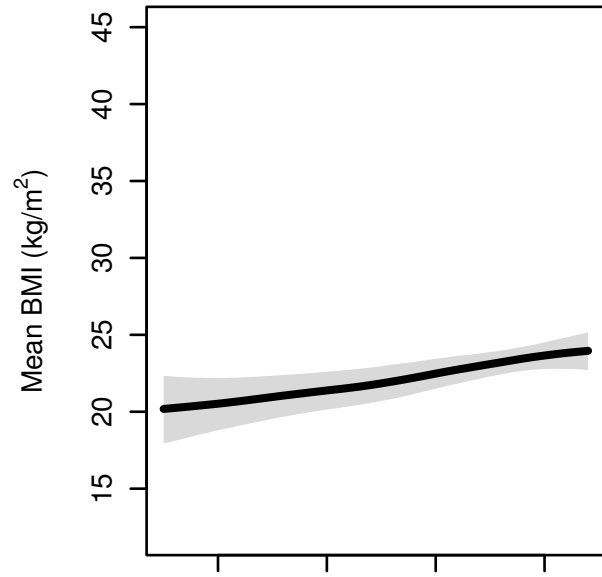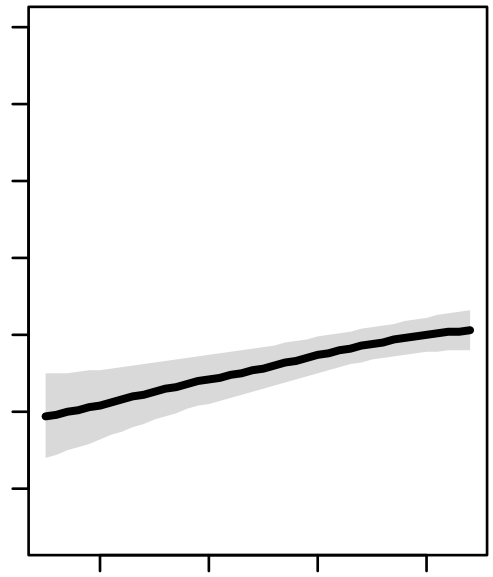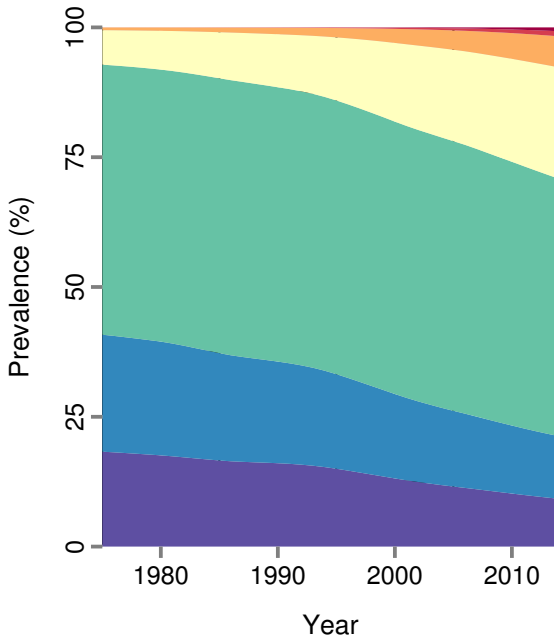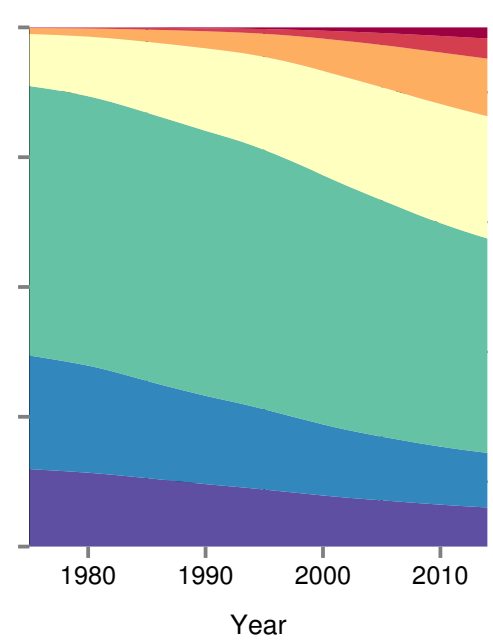

■ BMI <18.5 ■ BMI 18.5-20 ■ BMI 20-25 ■ BMI 25-30 ■ BMI 30-35 ■ BMI 35-40 ■ BMI ≥ 40

Cambodia  
South East Asia

Men

Women

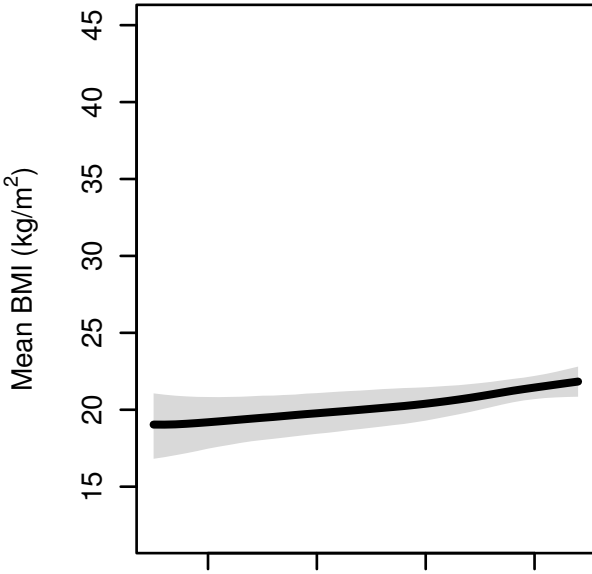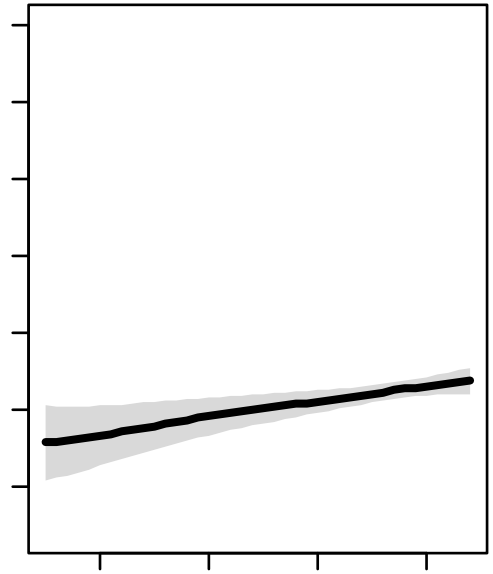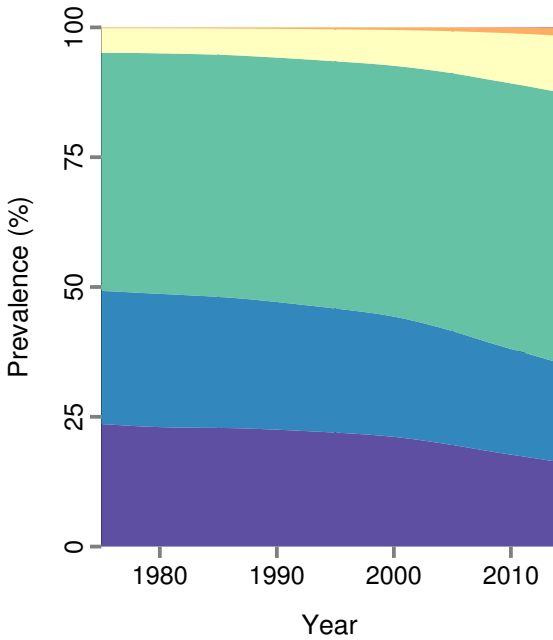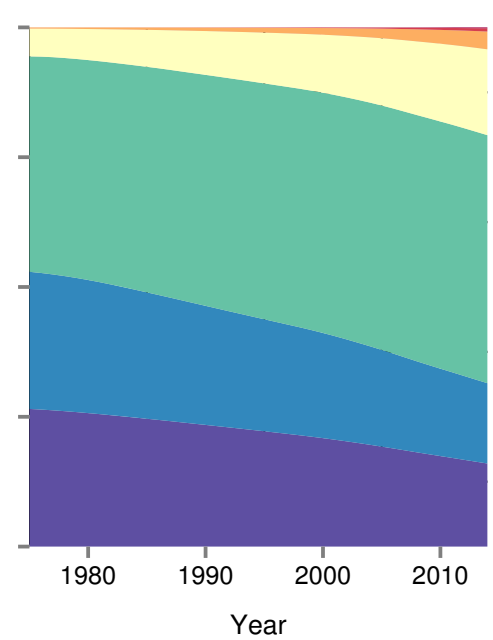

■ BMI <18.5 ■ BMI 18.5-20 ■ BMI 20-25 ■ BMI 25-30 ■ BMI 30-35 ■ BMI 35-40 ■ BMI ≥ 40

Cameroon  
West Africa

Men

Women

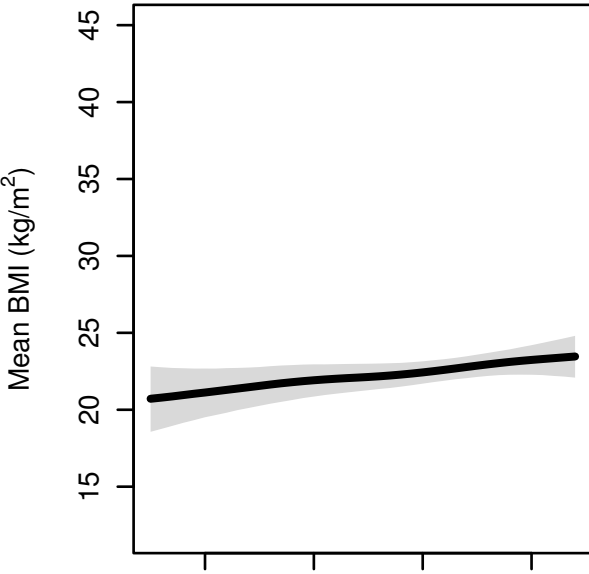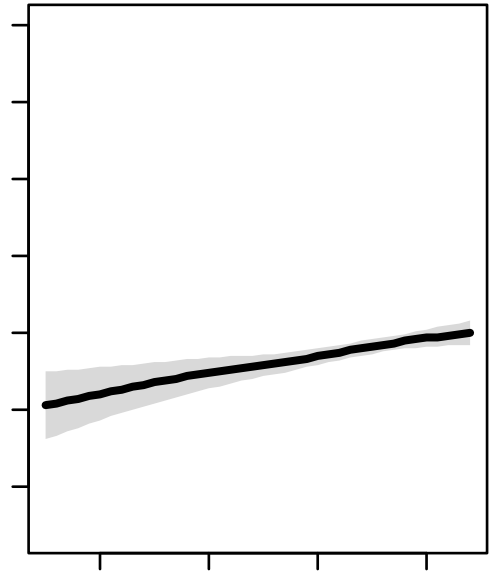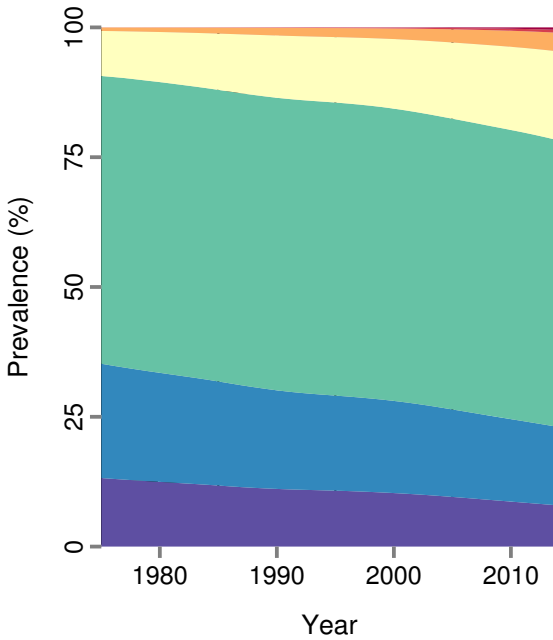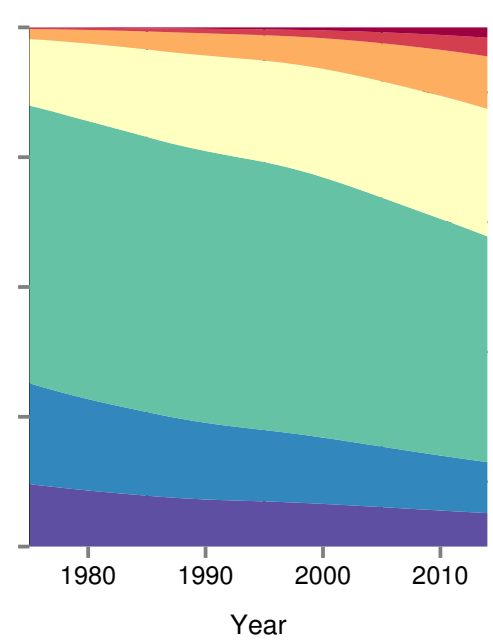

■ BMI <18.5 ■ BMI 18.5-20 ■ BMI 20-25 ■ BMI 25-30 ■ BMI 30-35 ■ BMI 35-40 ■ BMI ≥ 40

Canada  
High-income English-speaking countries

Men

Women

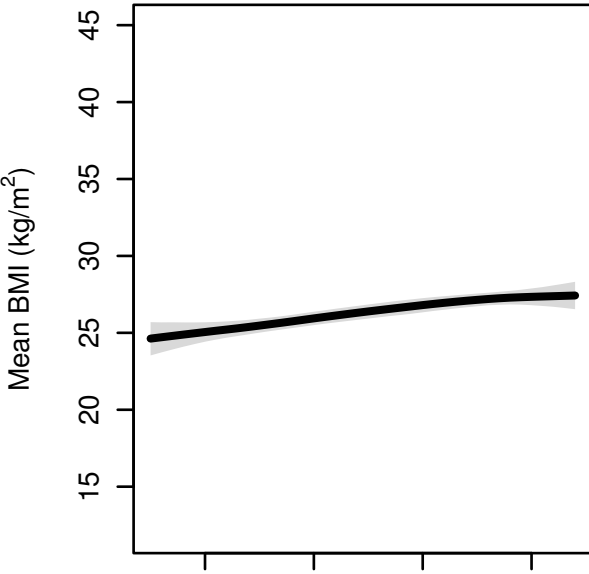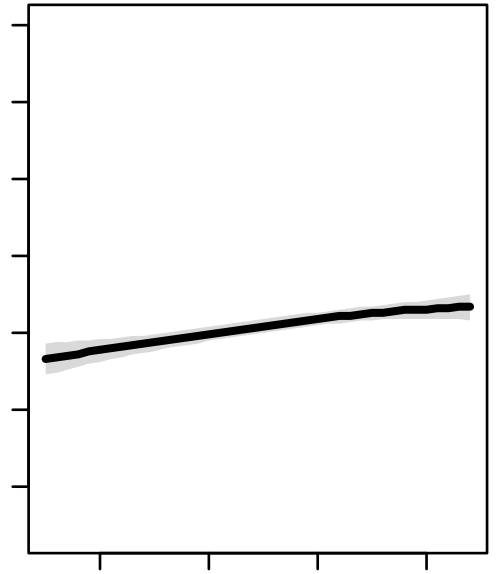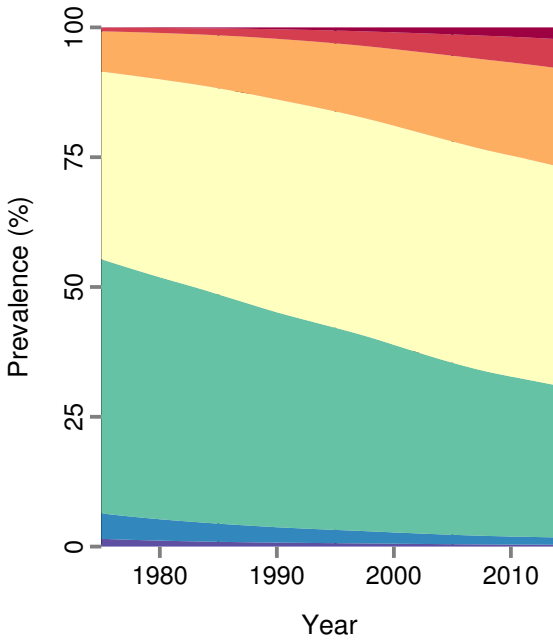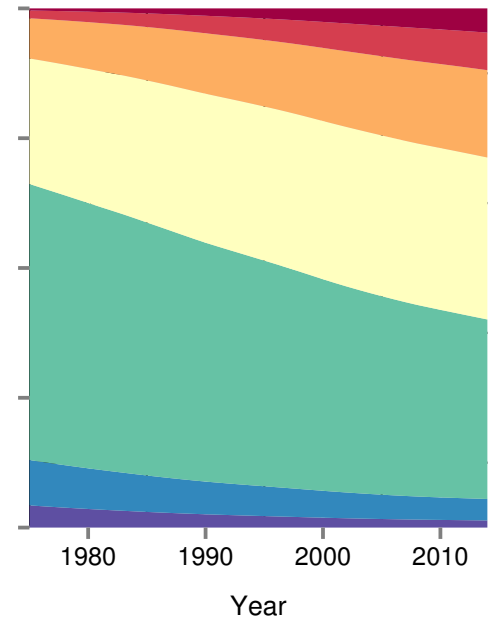

■ BMI <18.5 ■ BMI 18.5-20 ■ BMI 20-25 ■ BMI 25-30 ■ BMI 30-35 ■ BMI 35-40 ■ BMI ≥ 40

# Central African Republic

## Central Africa

### Men

### Women

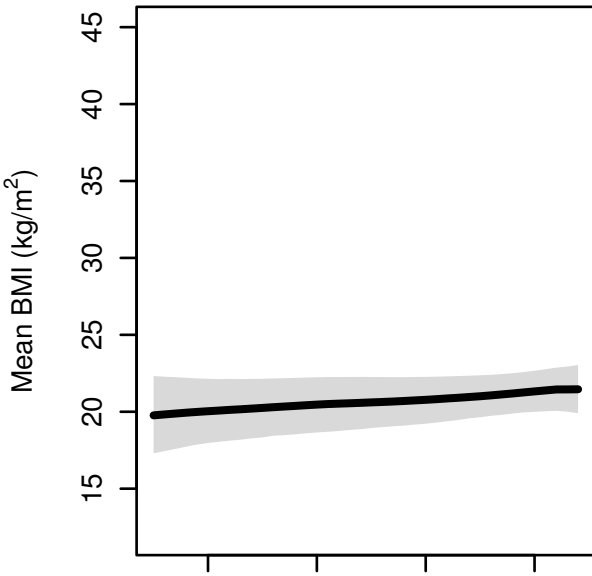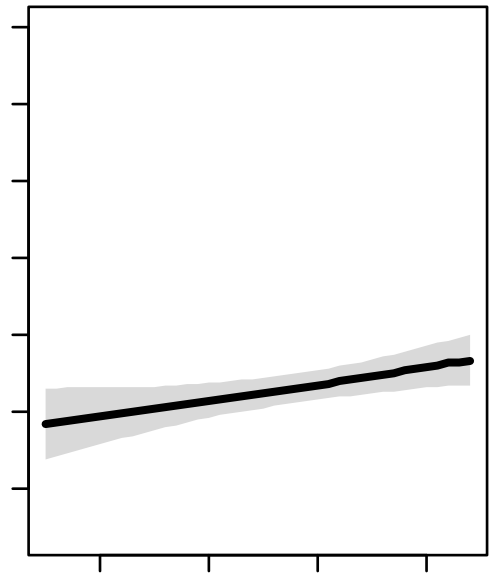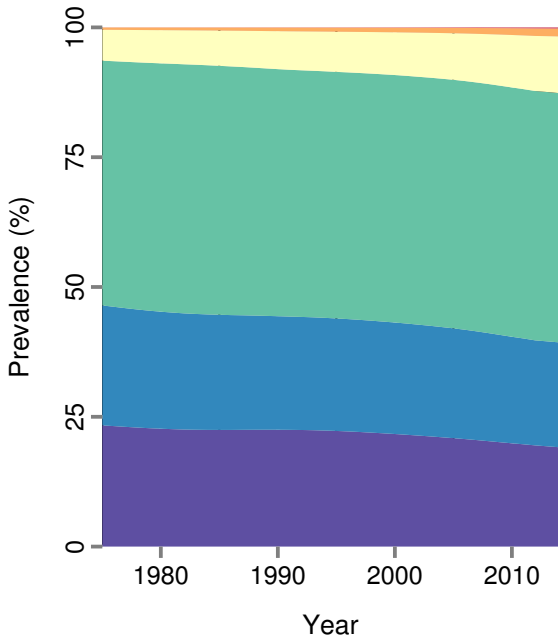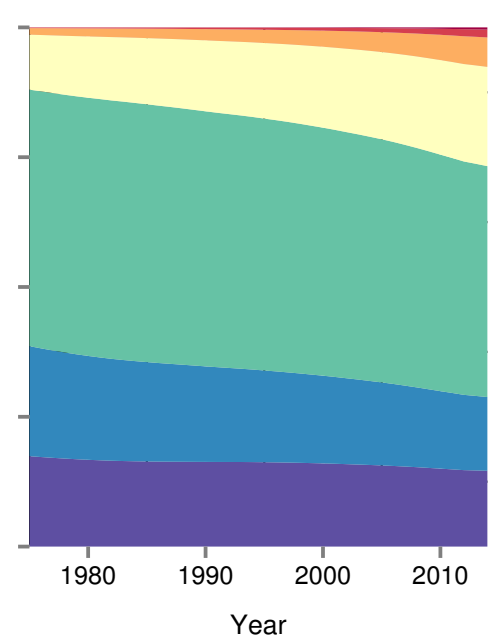

■ BMI <18.5 ■ BMI 18.5-20 ■ BMI 20-25 ■ BMI 25-30 ■ BMI 30-35 ■ BMI 35-40 ■ BMI ≥ 40



Chad  
West Africa

Men

Women

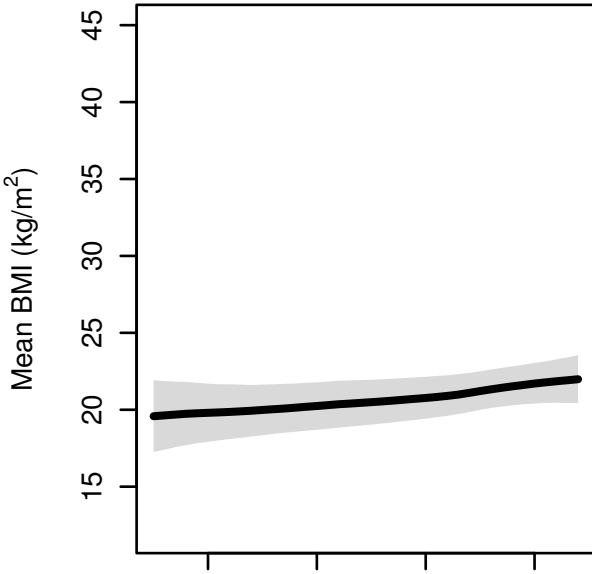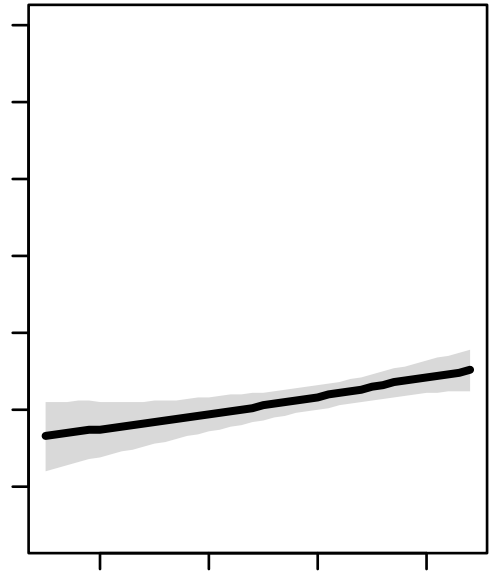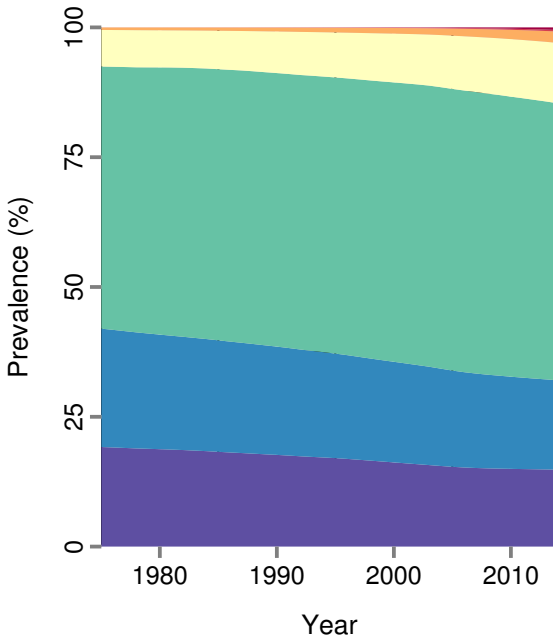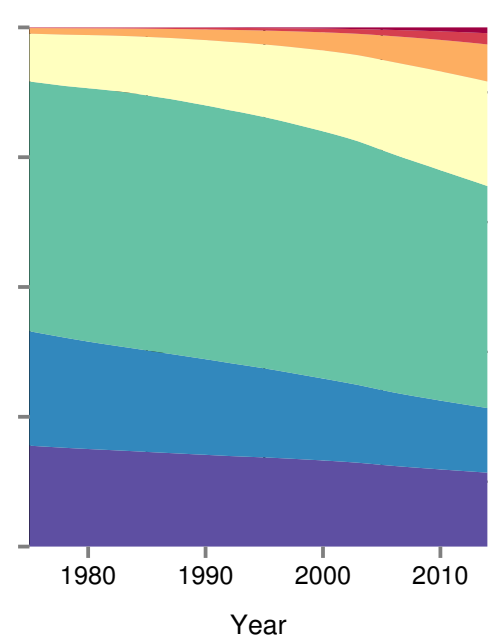

■ BMI <18.5 ■ BMI 18.5-20 ■ BMI 20-25 ■ BMI 25-30 ■ BMI 30-35 ■ BMI 35-40 ■ BMI ≥ 40

Chile  
Southern Latin America

Men

Women

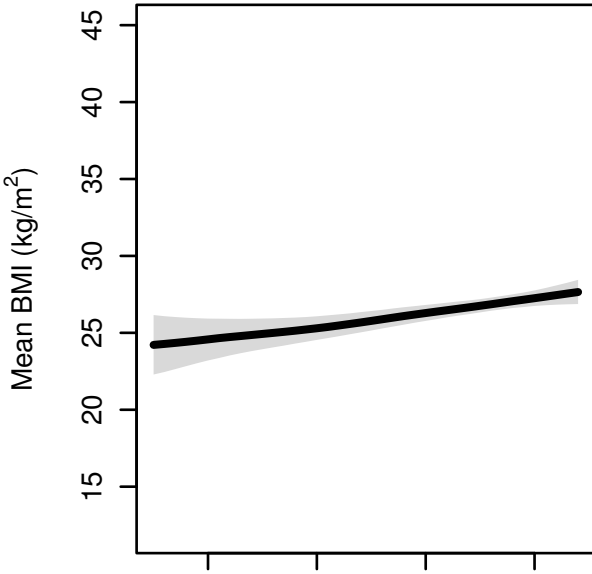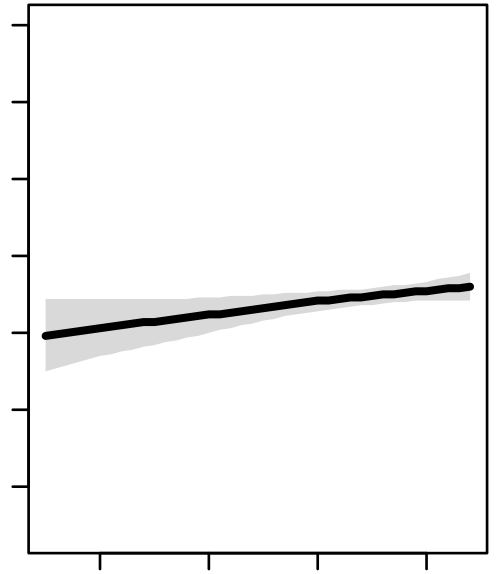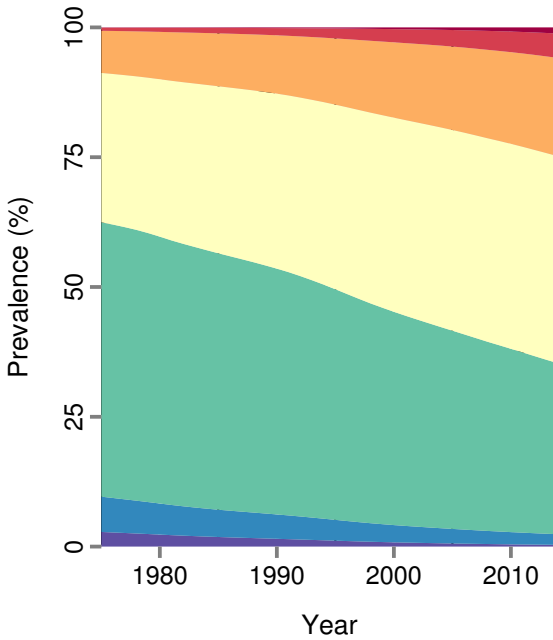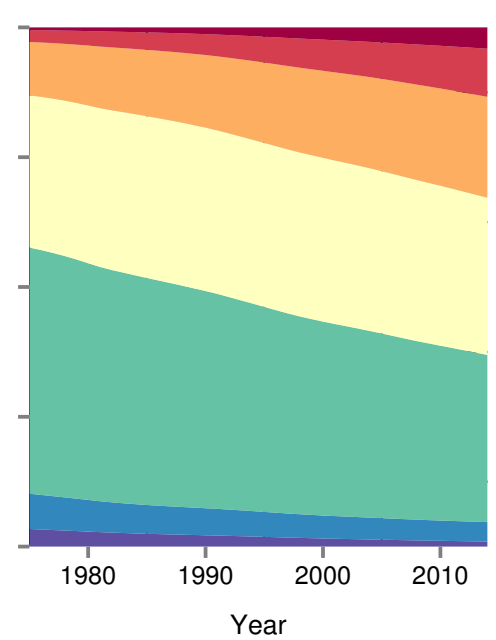

■ BMI <18.5 ■ BMI 18.5-20 ■ BMI 20-25 ■ BMI 25-30 ■ BMI 30-35 ■ BMI 35-40 ■ BMI ≥ 40

China  
East Asia

Men

Women

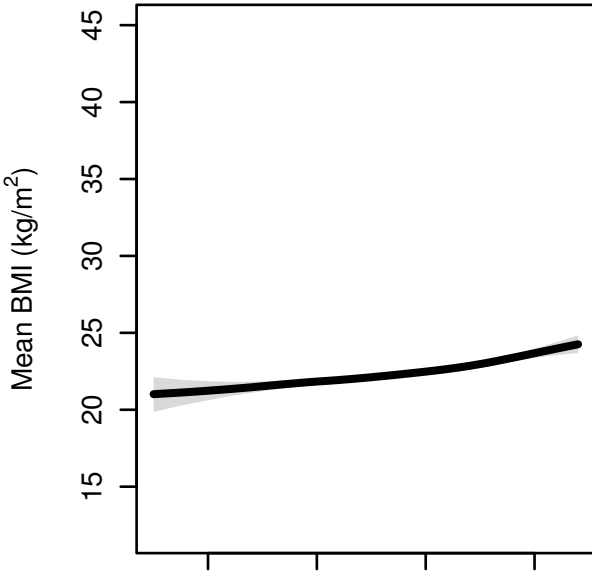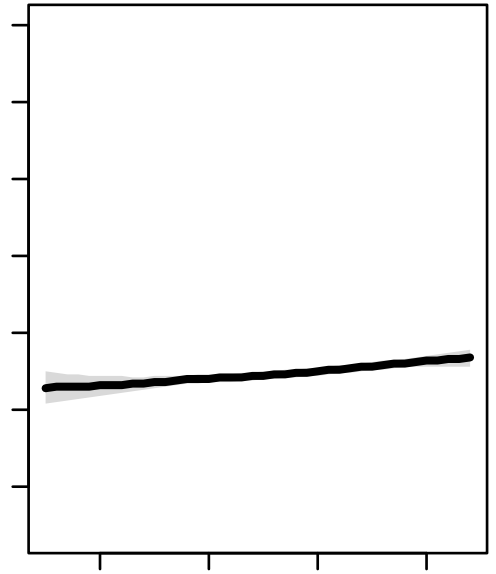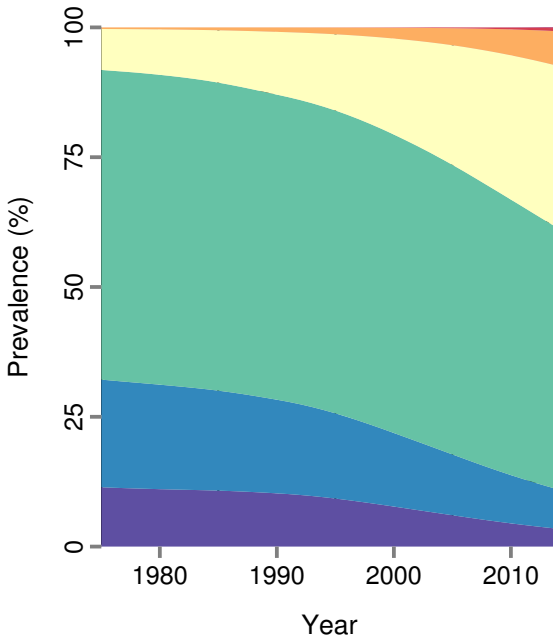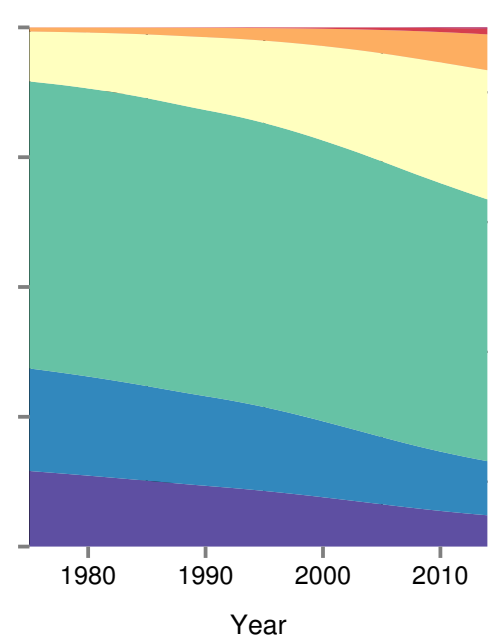

■ BMI <18.5 ■ BMI 18.5-20 ■ BMI 20-25 ■ BMI 25-30 ■ BMI 30-35 ■ BMI 35-40 ■ BMI ≥ 40

China (Hong Kong SAR)  
East Asia

Men

Women

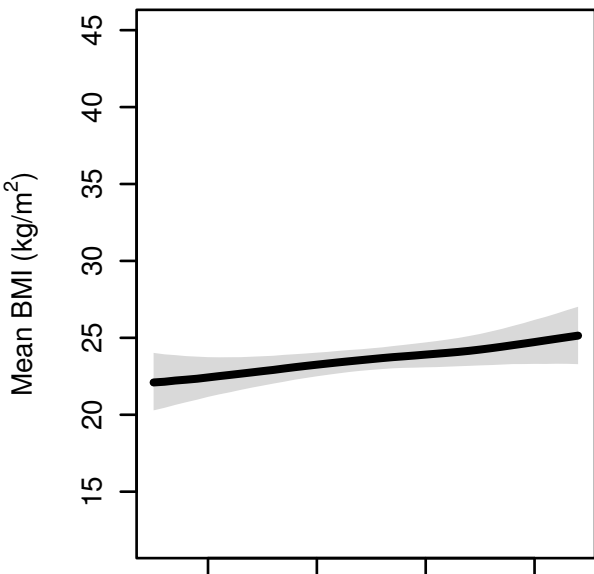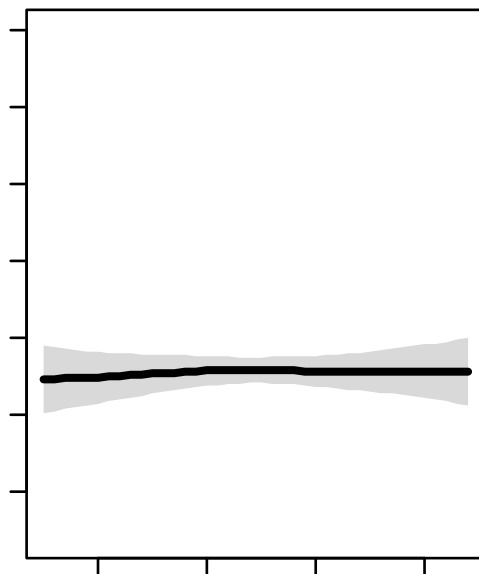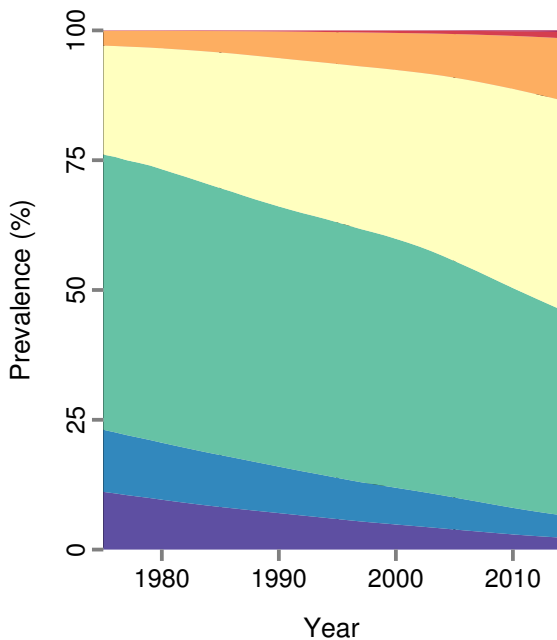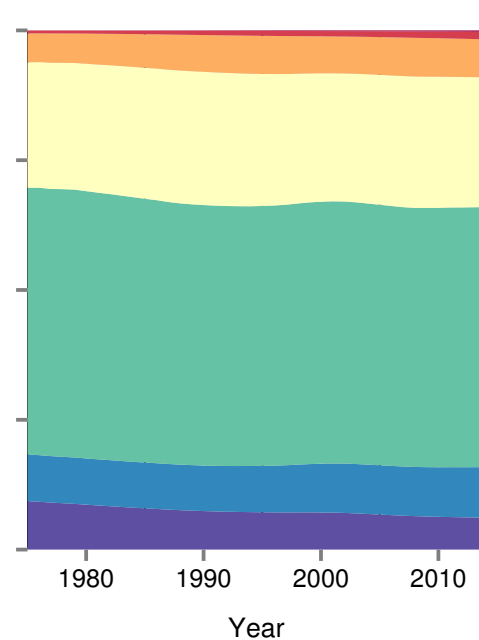

■ BMI <18.5 ■ BMI 18.5-20 ■ BMI 20-25 ■ BMI 25-30 ■ BMI 30-35 ■ BMI 35-40 ■ BMI ≥ 40

Colombia  
Central Latin America

Men

Women

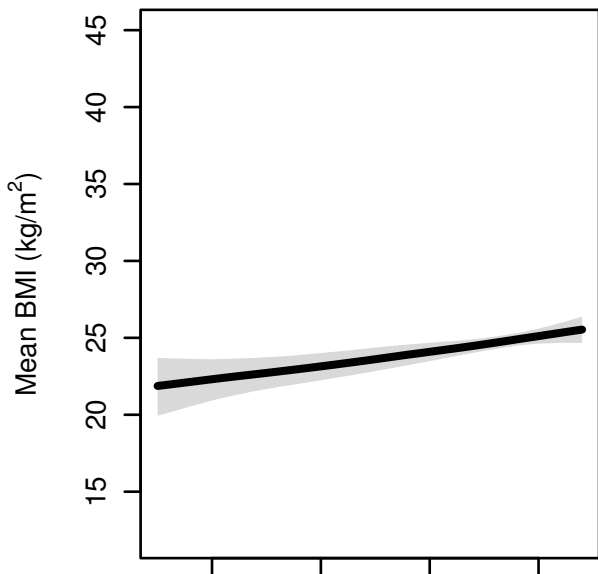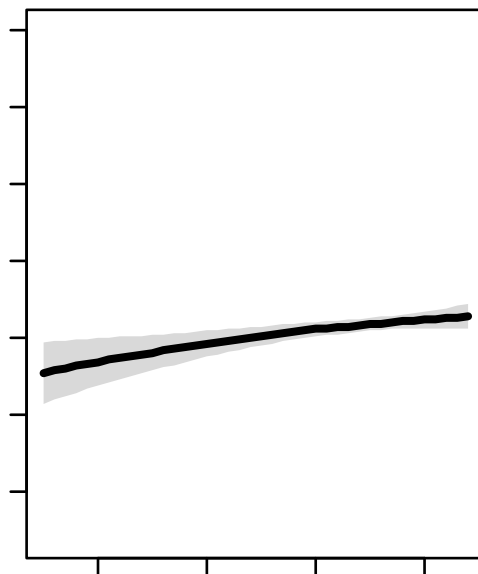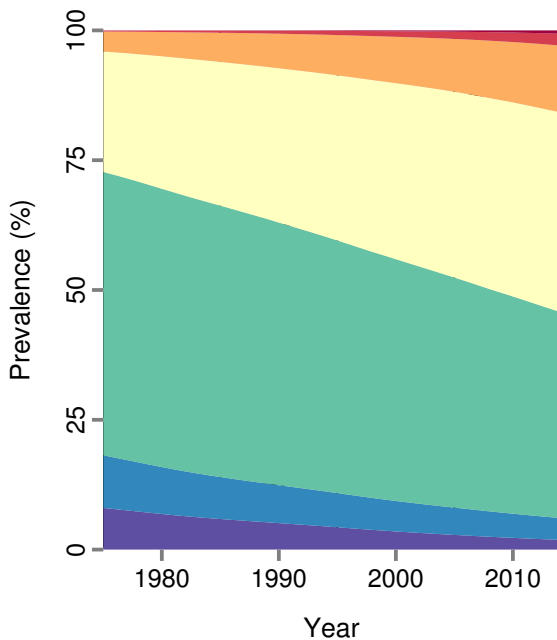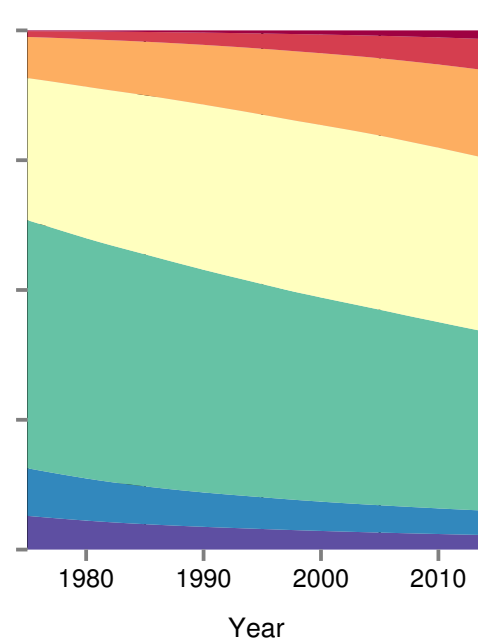

■ BMI <18.5 ■ BMI 18.5-20 ■ BMI 20-25 ■ BMI 25-30 ■ BMI 30-35 ■ BMI 35-40 ■ BMI ≥ 40

Comoros  
East Africa

Men

Women

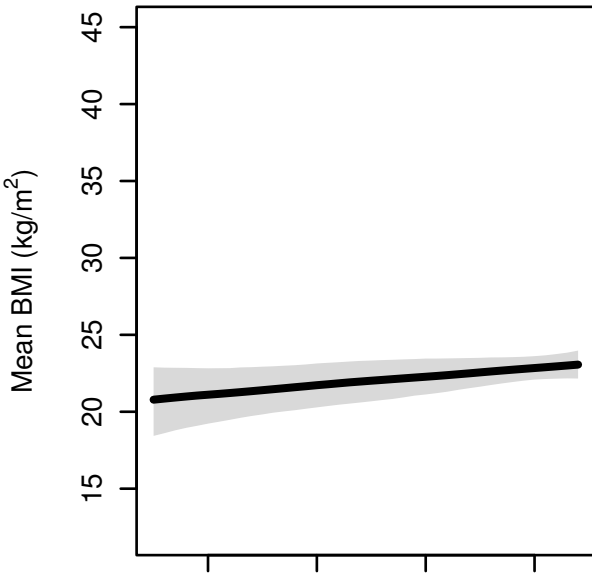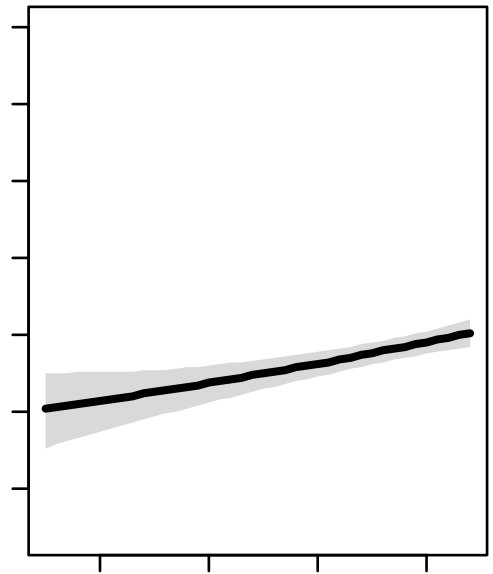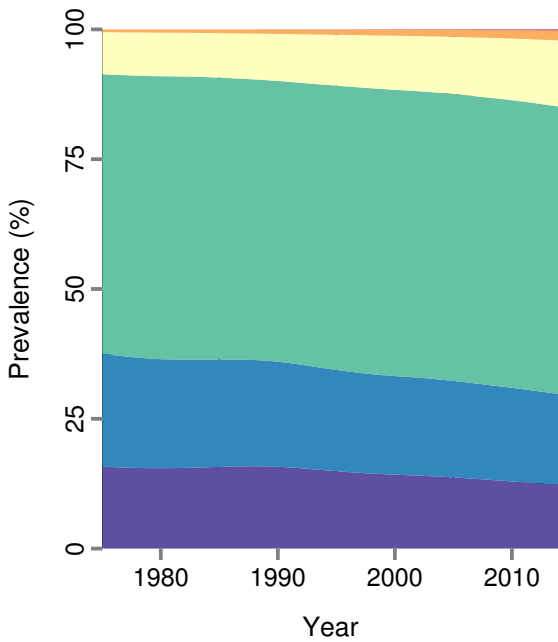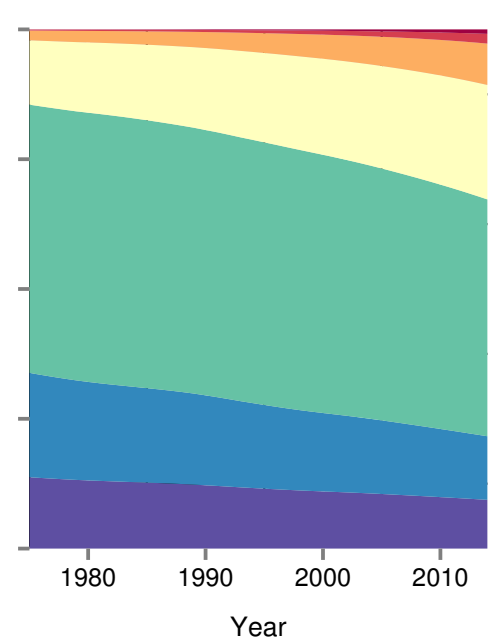

■ BMI <18.5 ■ BMI 18.5-20 ■ BMI 20-25 ■ BMI 25-30 ■ BMI 30-35 ■ BMI 35-40 ■ BMI ≥ 40

Congo  
Central Africa

Men

Women

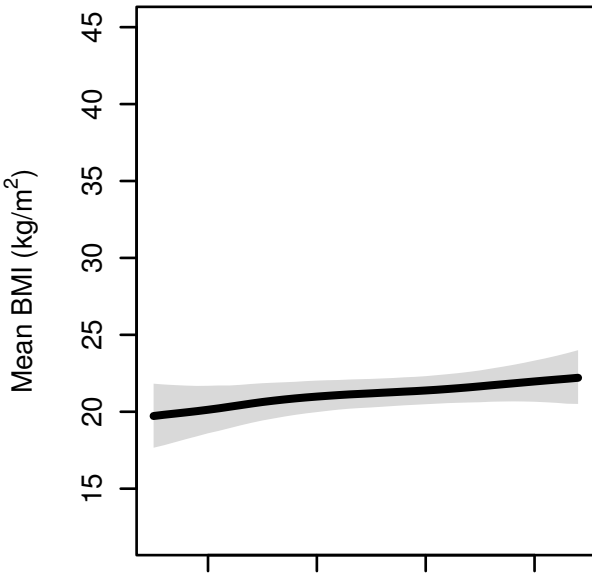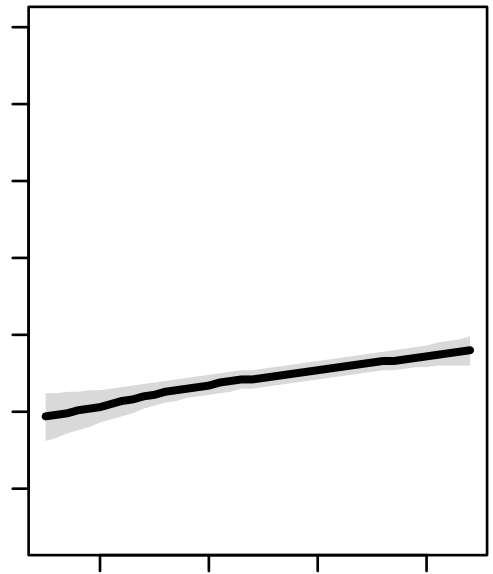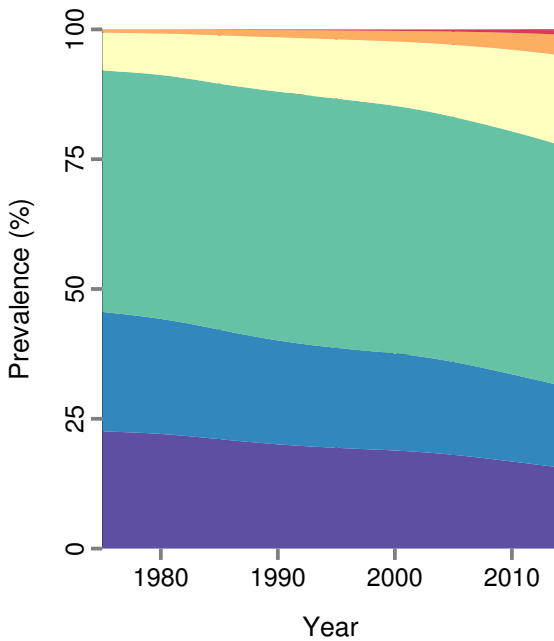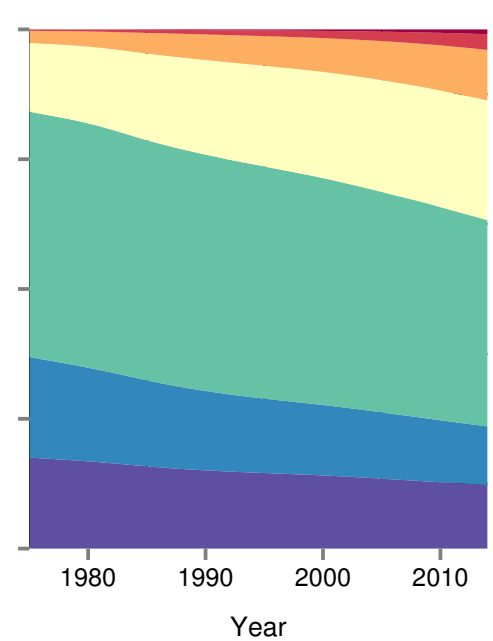

■ BMI <18.5 ■ BMI 18.5-20 ■ BMI 20-25 ■ BMI 25-30 ■ BMI 30-35 ■ BMI 35-40 ■ BMI ≥ 40

Cook Islands  
Polynesia and Micronesia

Men

Women

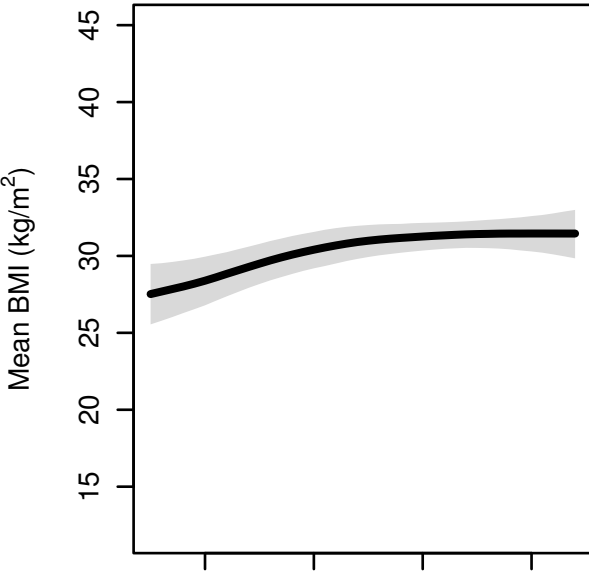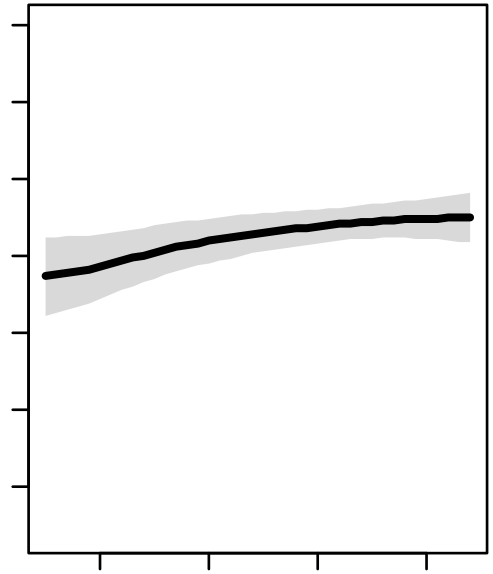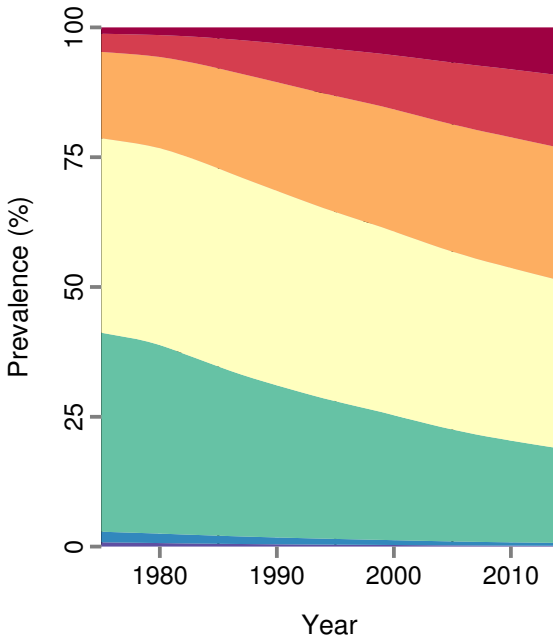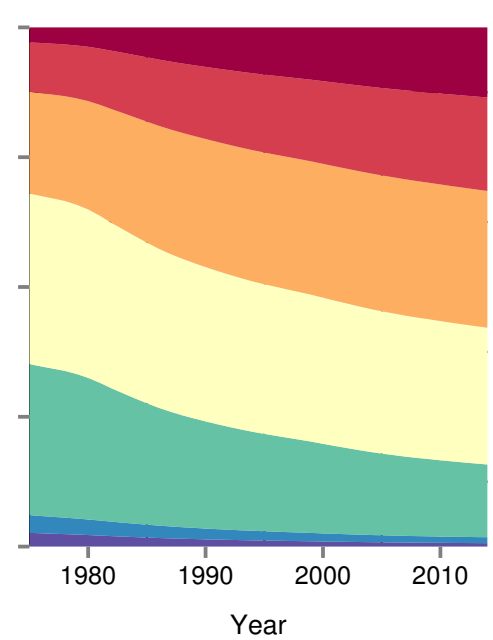

■ BMI <18.5 ■ BMI 18.5-20 ■ BMI 20-25 ■ BMI 25-30 ■ BMI 30-35 ■ BMI 35-40 ■ BMI ≥ 40



Costa Rica  
Central Latin America

Men

Women

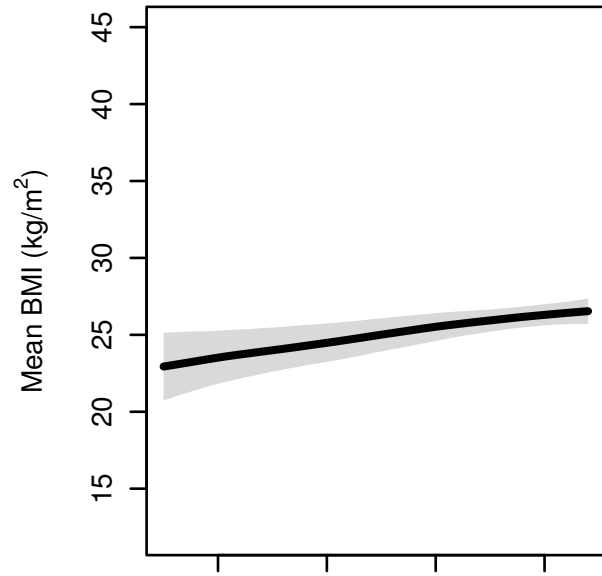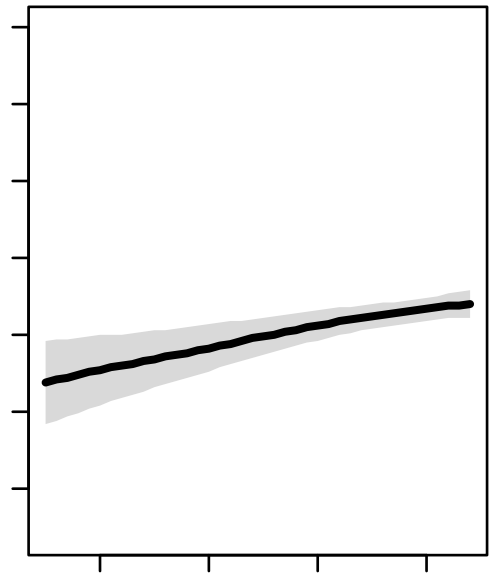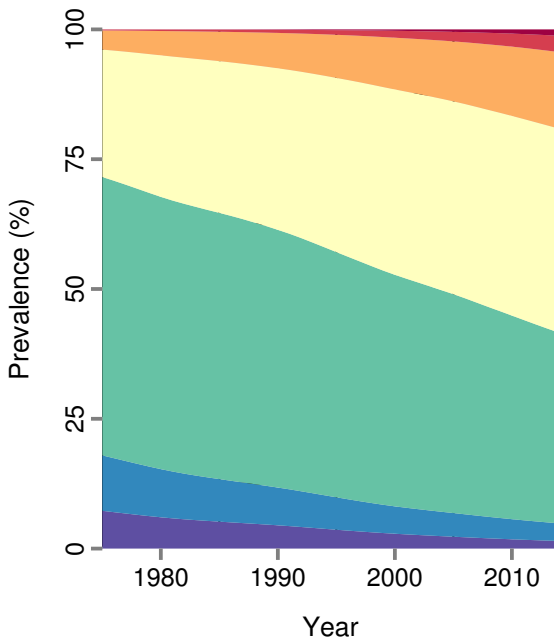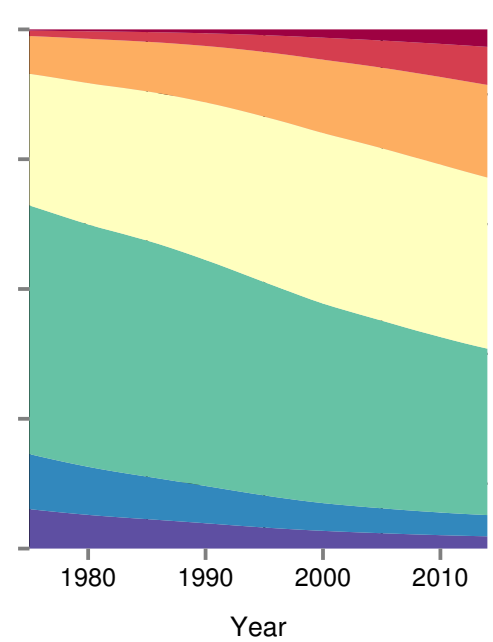

■ BMI <18.5 ■ BMI 18.5-20 ■ BMI 20-25 ■ BMI 25-30 ■ BMI 30-35 ■ BMI 35-40 ■ BMI ≥ 40

Cote d'Ivoire  
West Africa

Men

Women

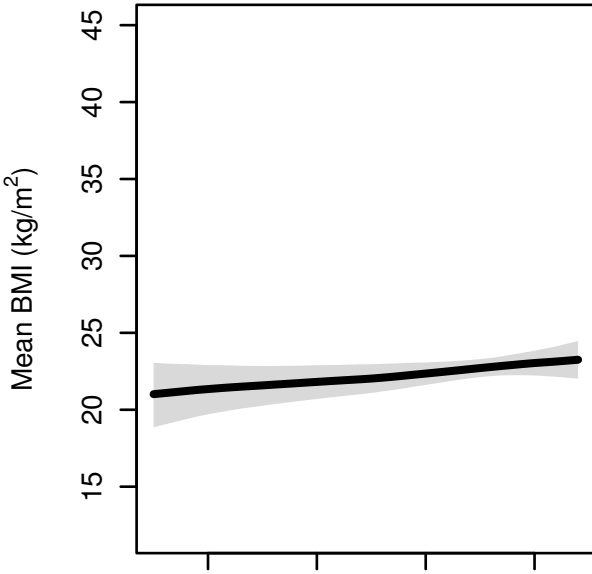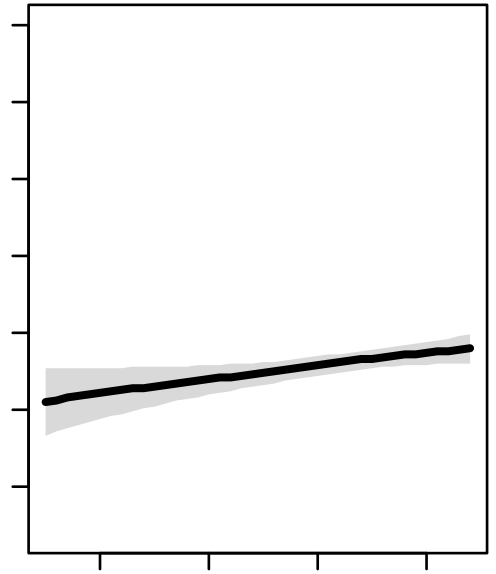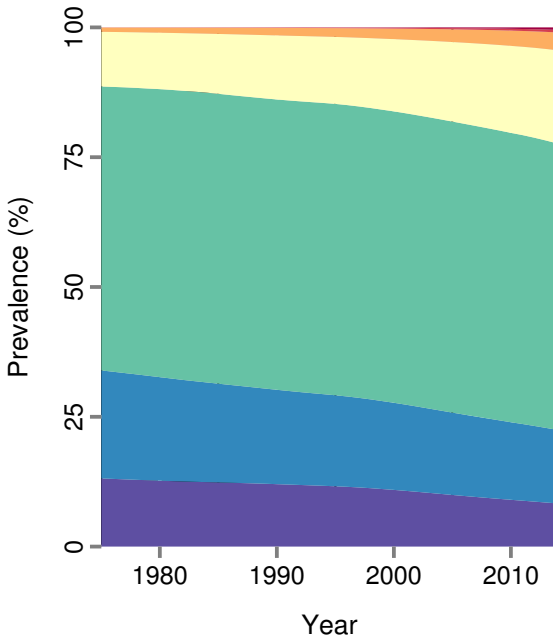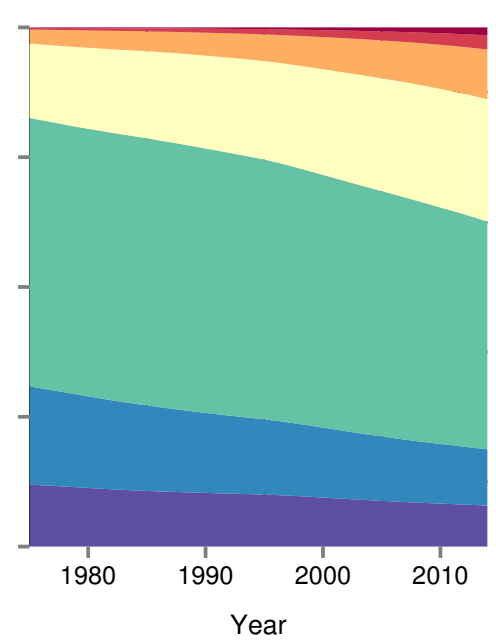

■ BMI <18.5 ■ BMI 18.5-20 ■ BMI 20-25 ■ BMI 25-30 ■ BMI 30-35 ■ BMI 35-40 ■ BMI ≥ 40

Croatia  
Central Europe

Men

Women

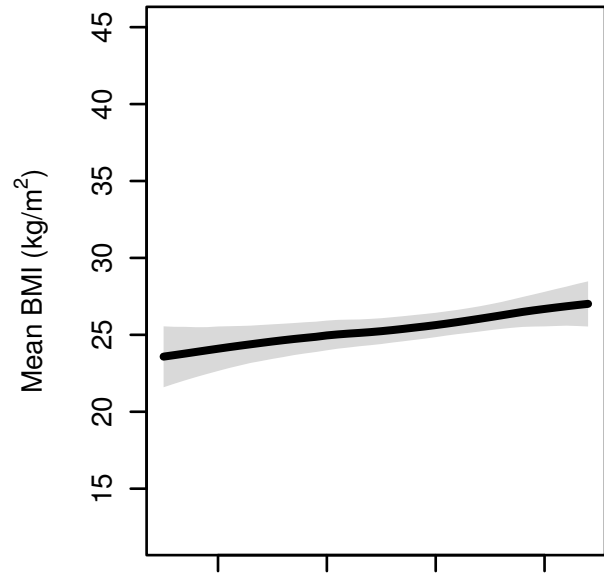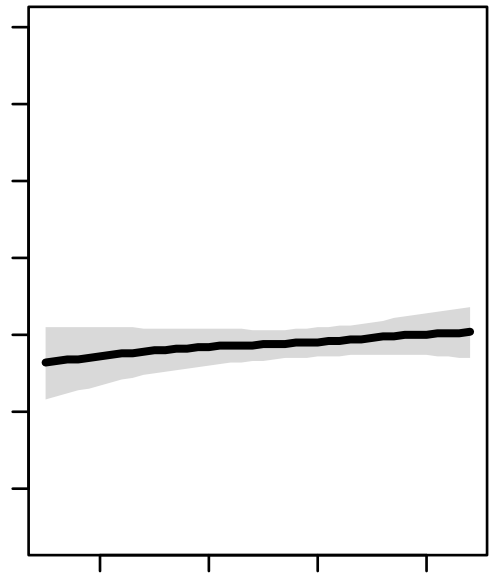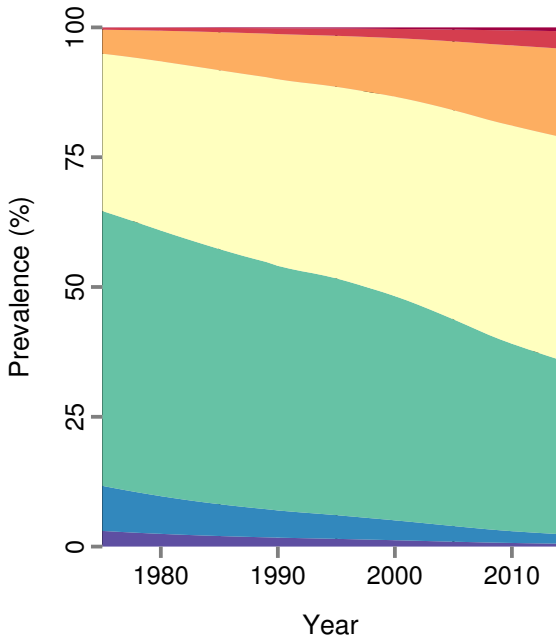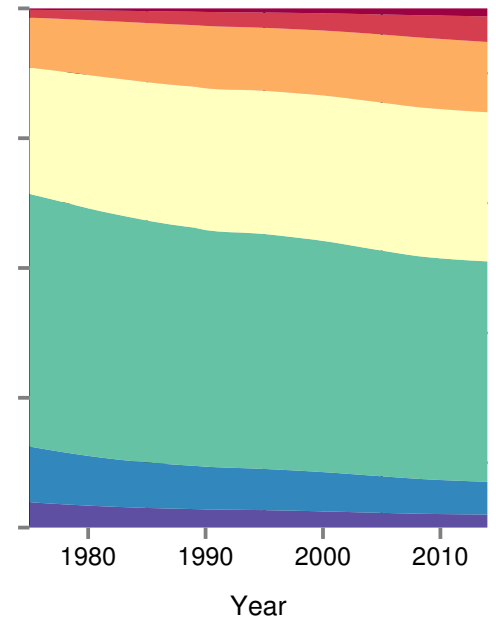

■ BMI <18.5 ■ BMI 18.5-20 ■ BMI 20-25 ■ BMI 25-30 ■ BMI 30-35 ■ BMI 35-40 ■ BMI ≥ 40

Cuba  
Caribbean

Men

Women

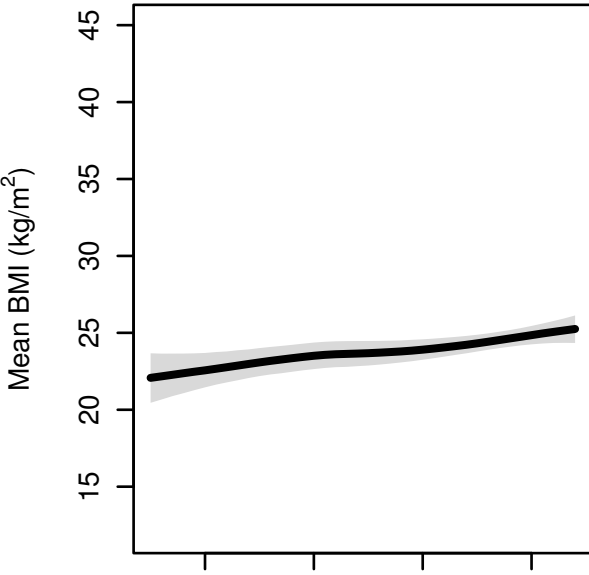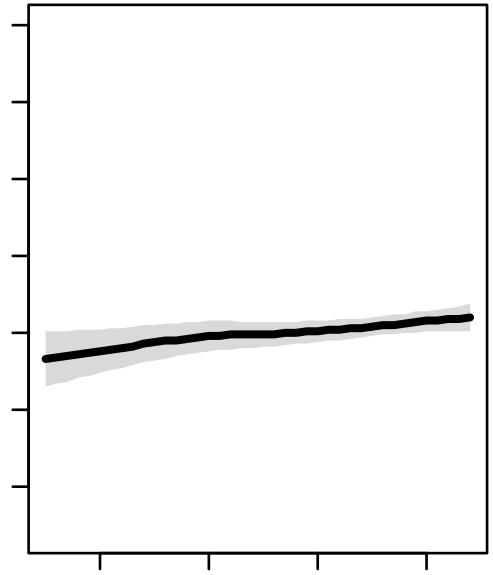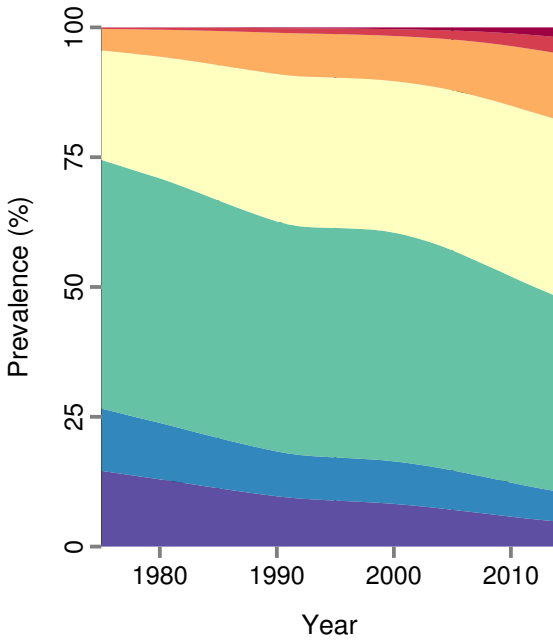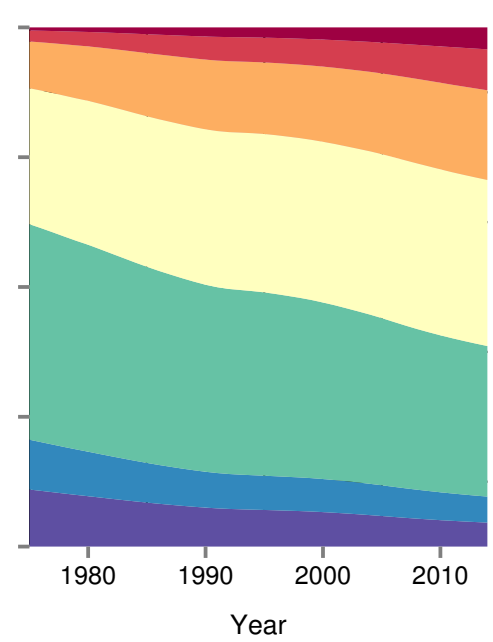

■ BMI <18.5 ■ BMI 18.5-20 ■ BMI 20-25 ■ BMI 25-30 ■ BMI 30-35 ■ BMI 35-40 ■ BMI ≥ 40

Cyprus  
South Western Europe

Men

Women

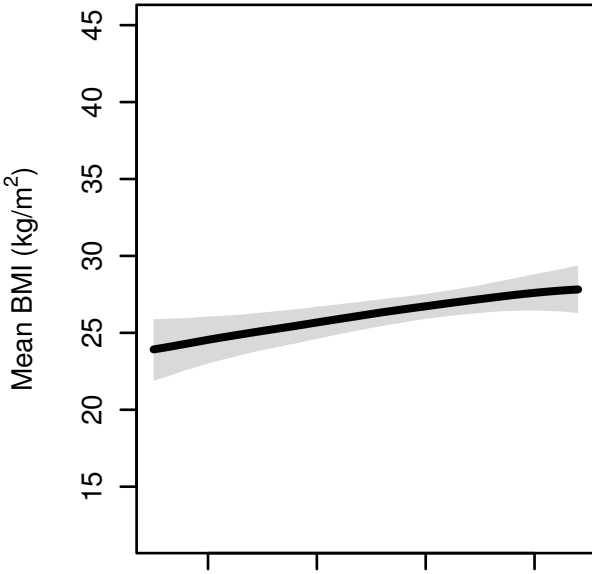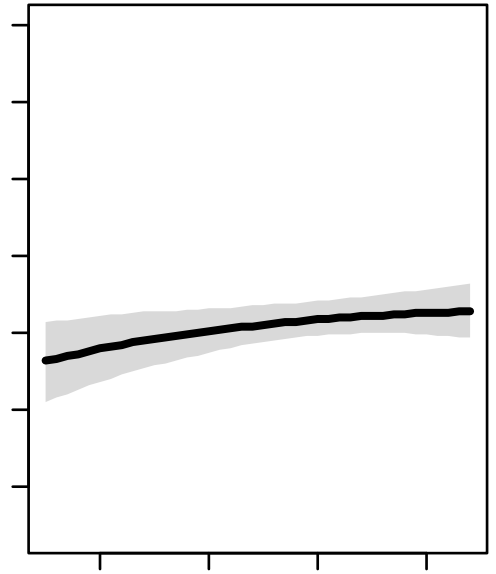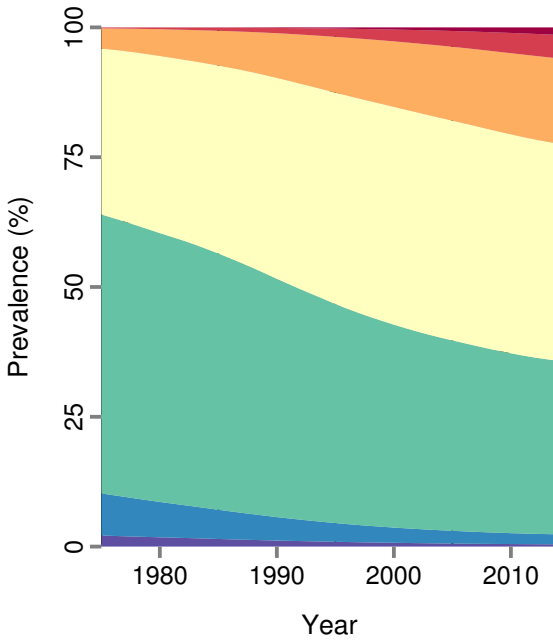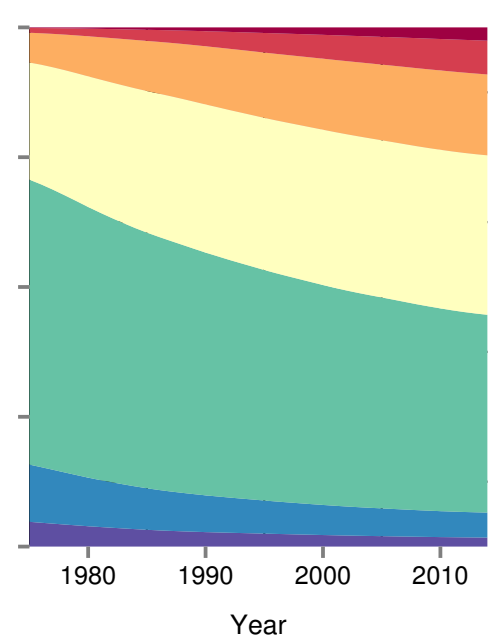

■ BMI <18.5 ■ BMI 18.5-20 ■ BMI 20-25 ■ BMI 25-30 ■ BMI 30-35 ■ BMI 35-40 ■ BMI ≥ 40

Czech Republic  
Central Europe

Men

Women

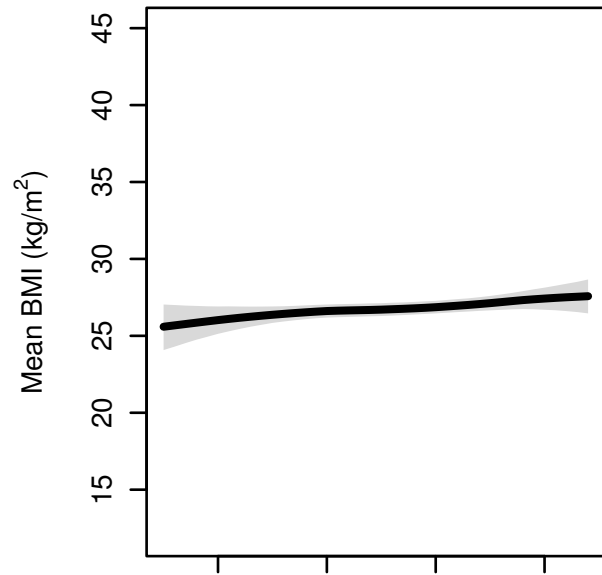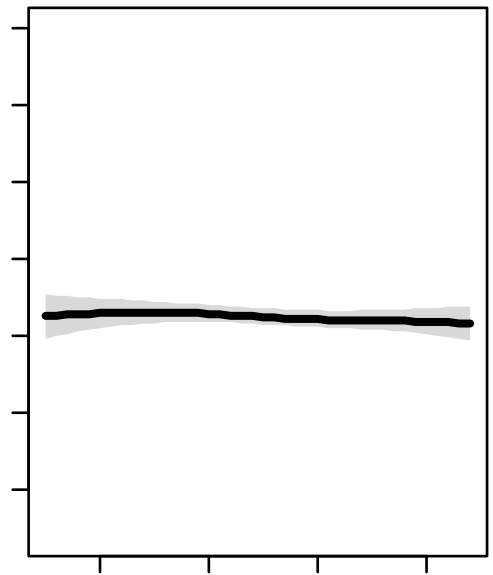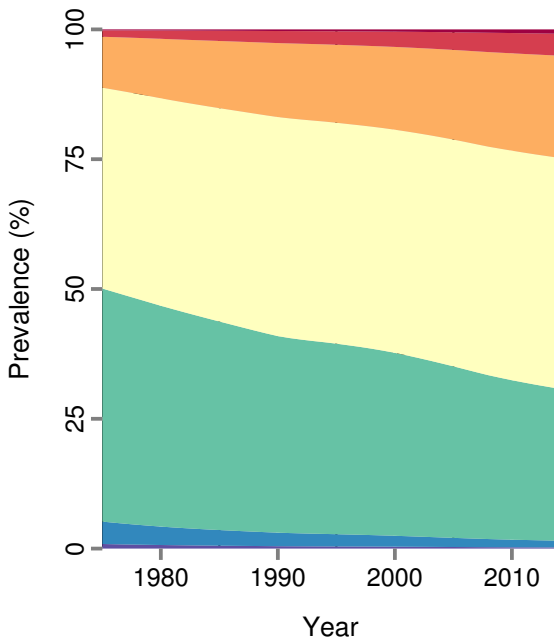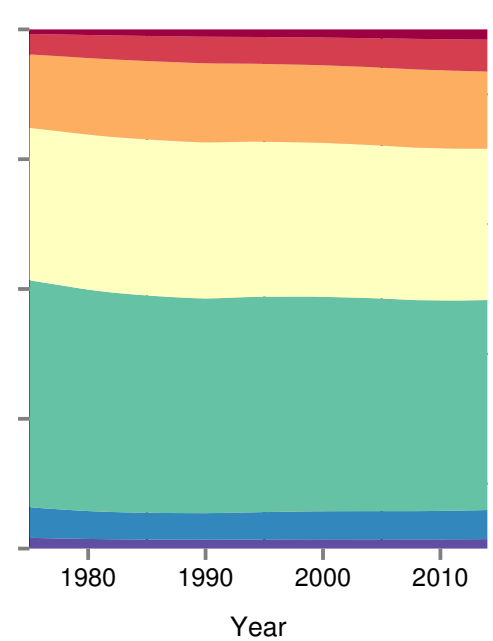

■ BMI <18.5 ■ BMI 18.5-20 ■ BMI 20-25 ■ BMI 25-30 ■ BMI 30-35 ■ BMI 35-40 ■ BMI ≥ 40

Denmark  
North Western Europe

Men

Women

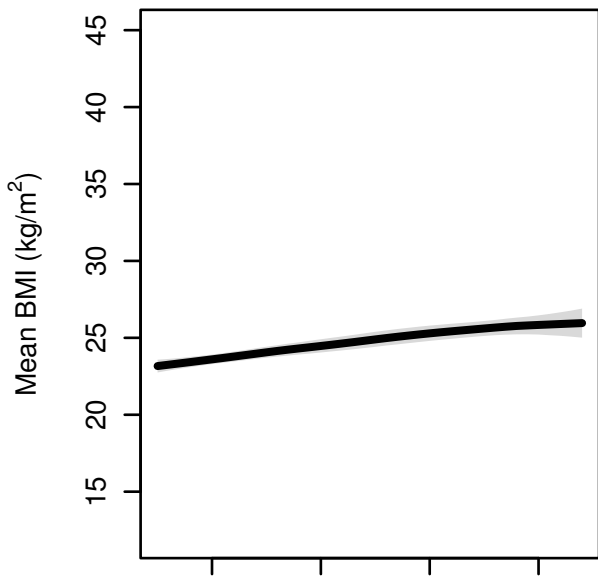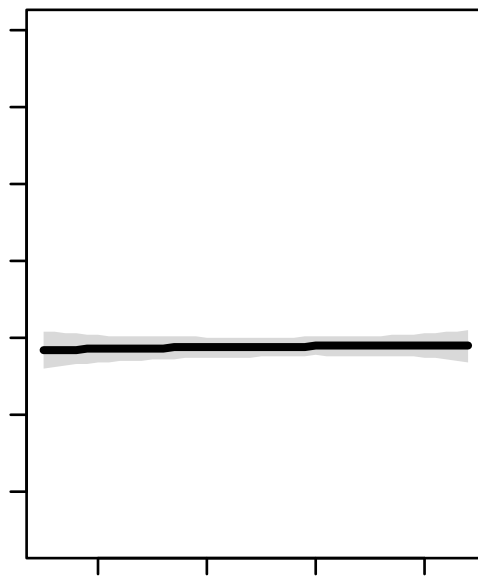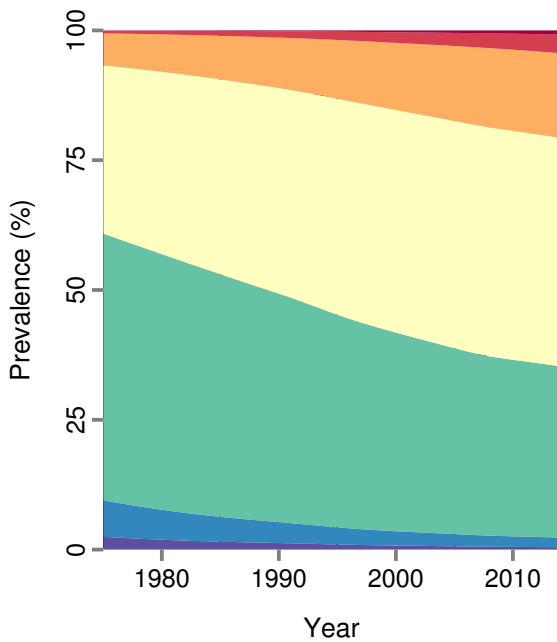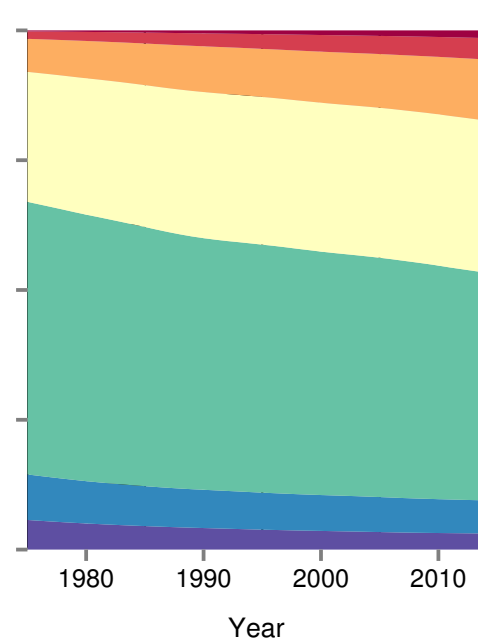

■ BMI <18.5 ■ BMI 18.5-20 ■ BMI 20-25 ■ BMI 25-30 ■ BMI 30-35 ■ BMI 35-40 ■ BMI ≥ 40

Djibouti  
East Africa

Men

Women

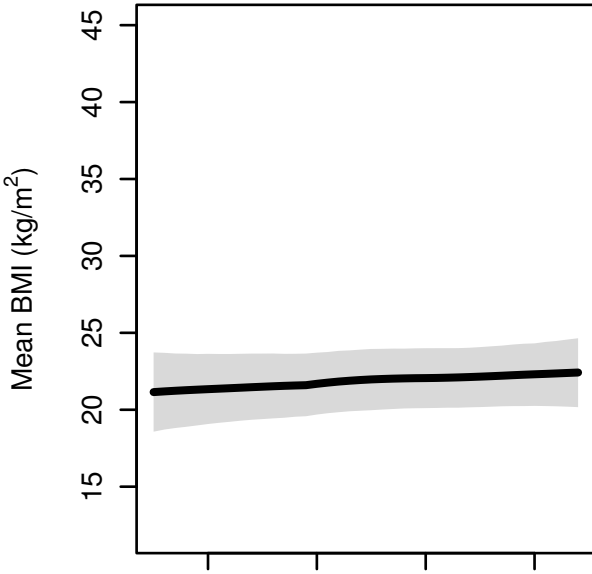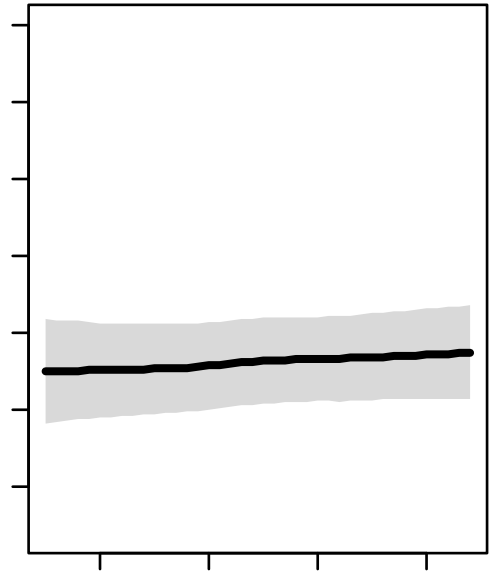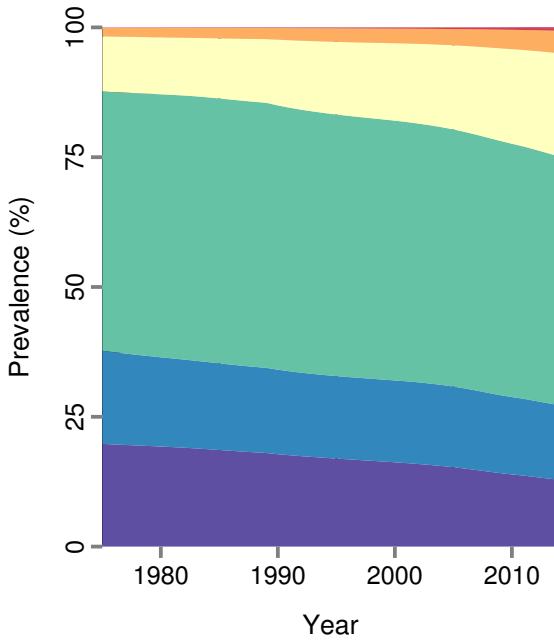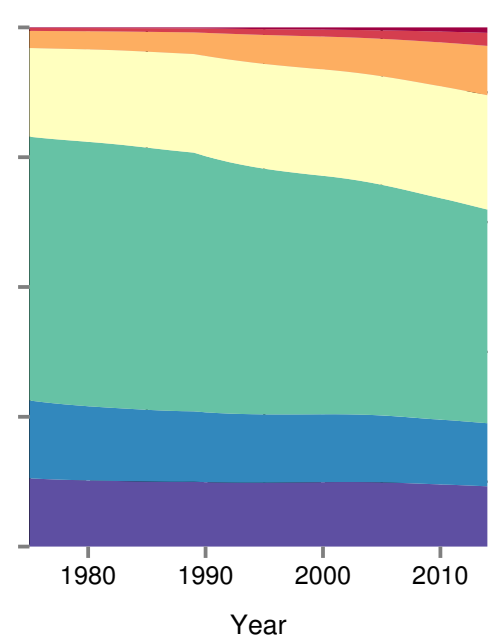

■ BMI <18.5 ■ BMI 18.5-20 ■ BMI 20-25 ■ BMI 25-30 ■ BMI 30-35 ■ BMI 35-40 ■ BMI ≥ 40



Dominica  
Caribbean

Men

Women

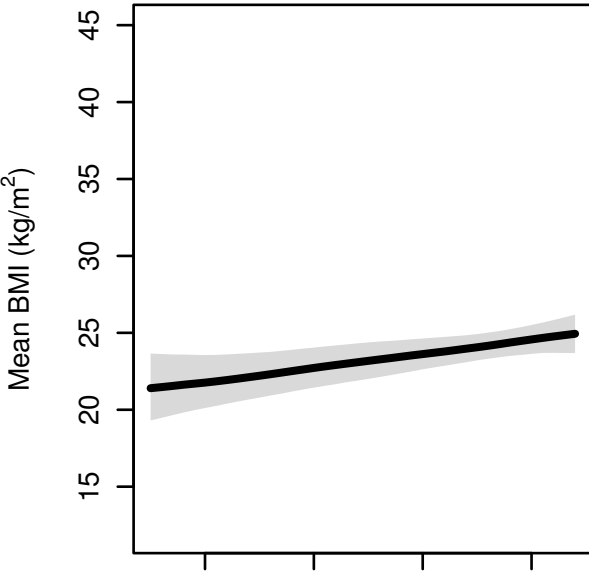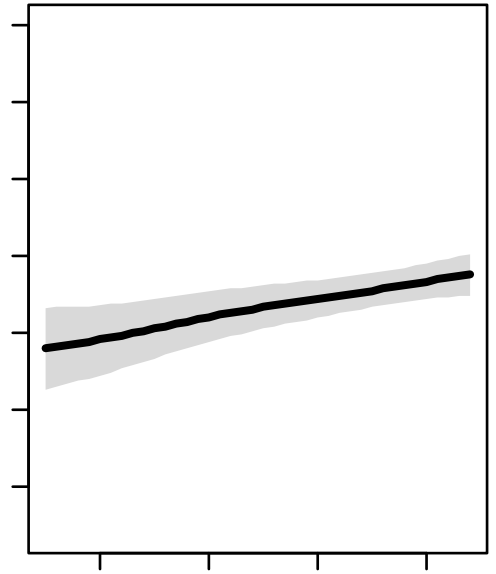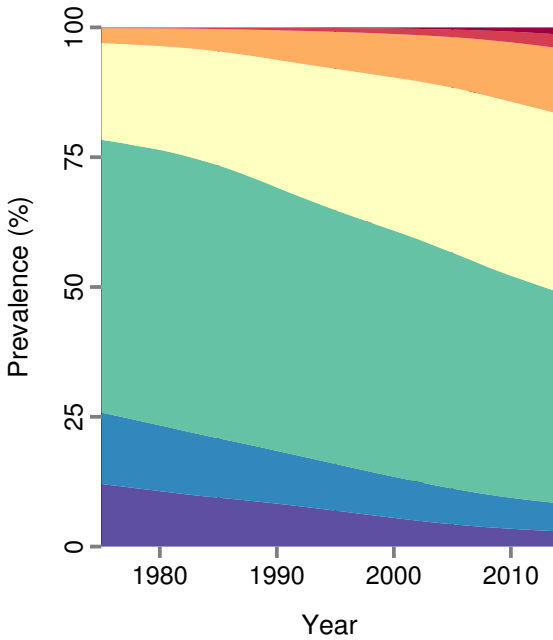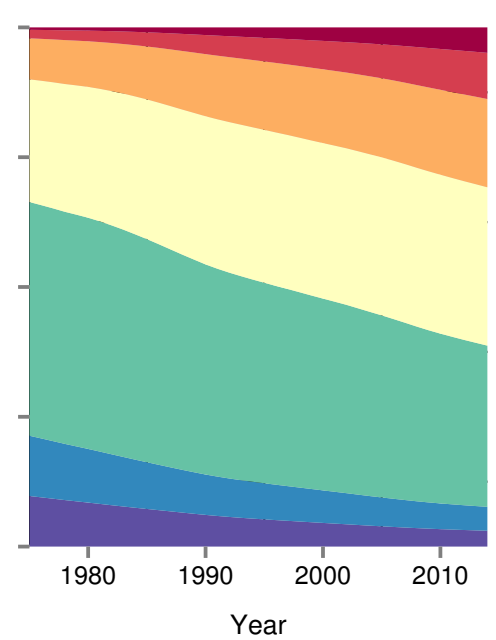

■ BMI <18.5 ■ BMI 18.5-20 ■ BMI 20-25 ■ BMI 25-30 ■ BMI 30-35 ■ BMI 35-40 ■ BMI ≥ 40

# Dominican Republic Caribbean

## Men

## Women

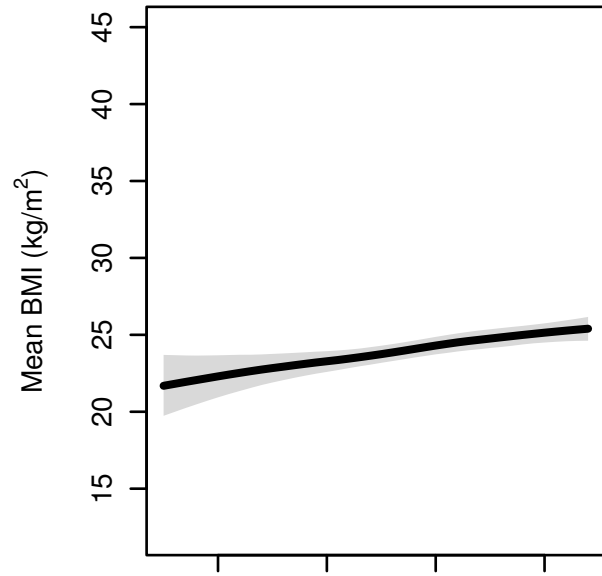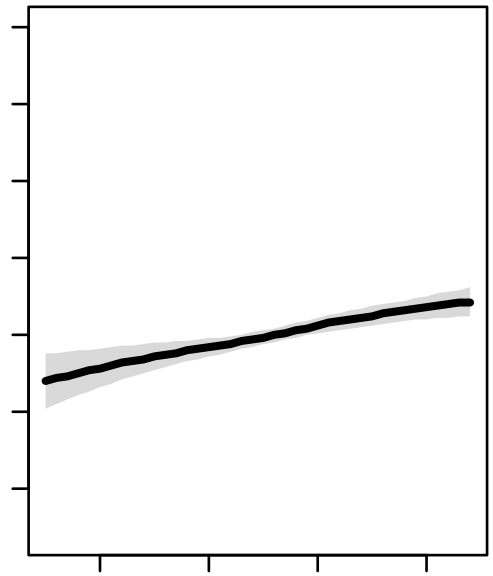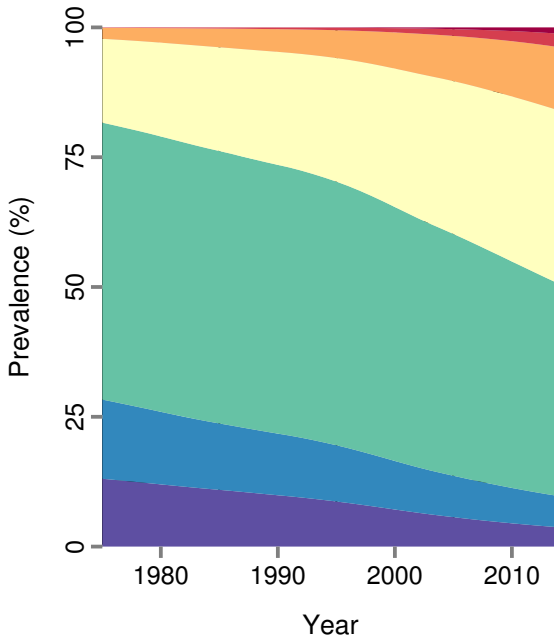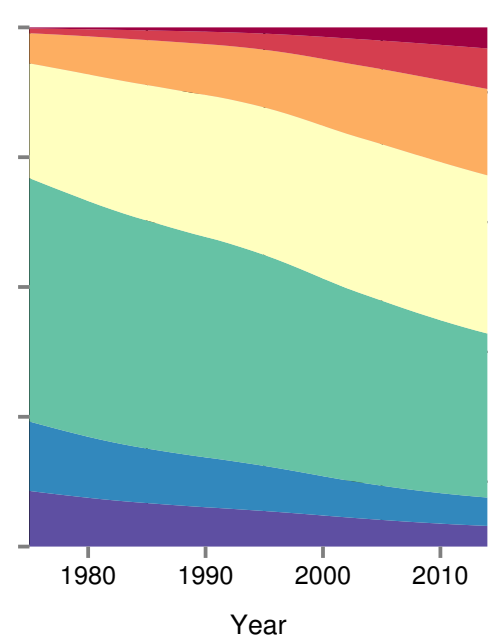

■ BMI <18.5 ■ BMI 18.5-20 ■ BMI 20-25 ■ BMI 25-30 ■ BMI 30-35 ■ BMI 35-40 ■ BMI ≥ 40

DR Congo  
Central Africa

Men

Women

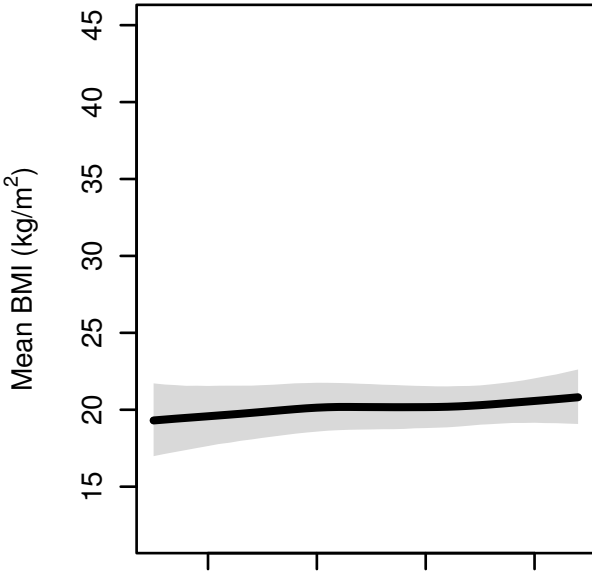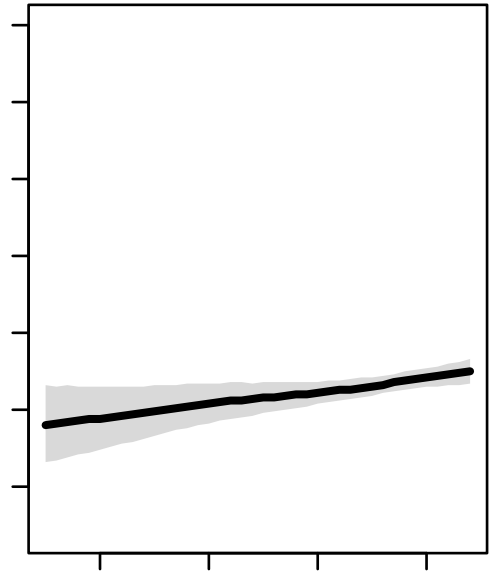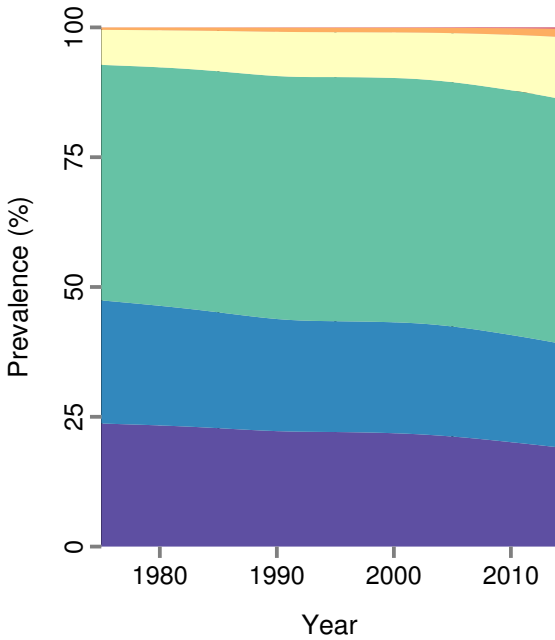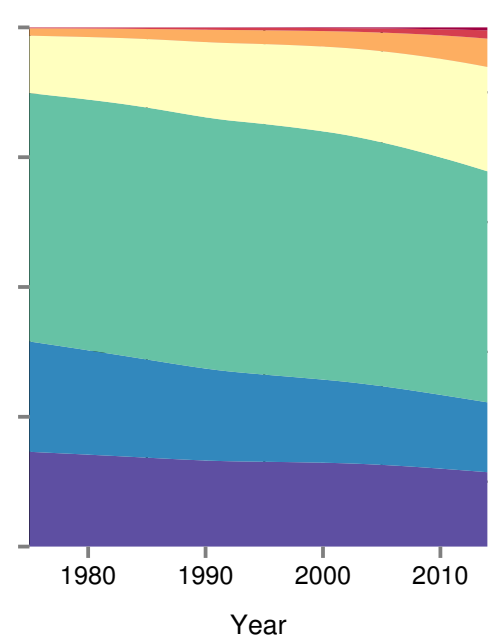

■ BMI <18.5 ■ BMI 18.5-20 ■ BMI 20-25 ■ BMI 25-30 ■ BMI 30-35 ■ BMI 35-40 ■ BMI ≥ 40

Ecuador  
Andean Latin America

Men

Women

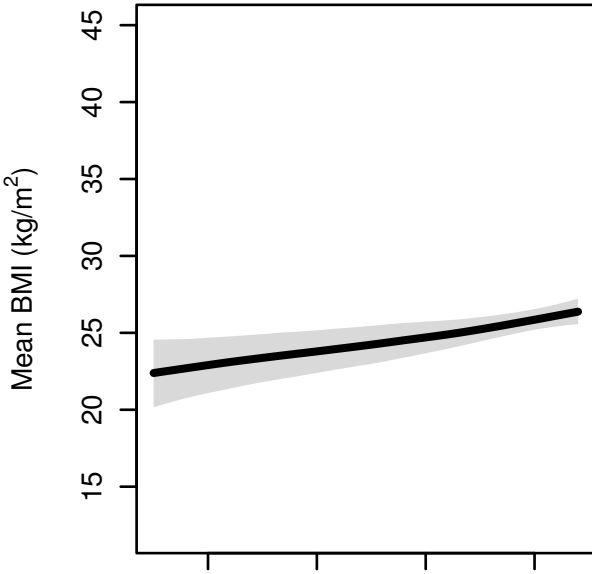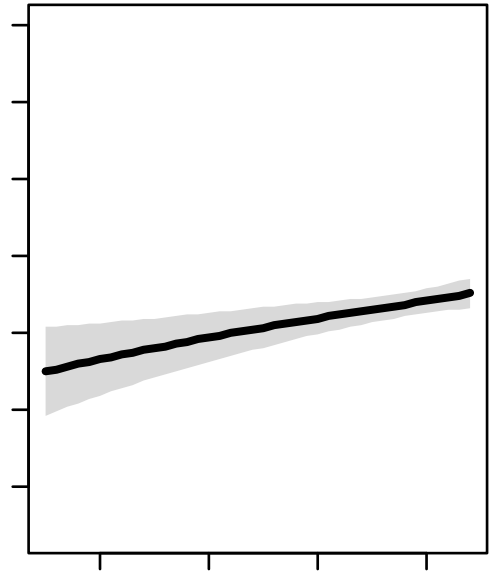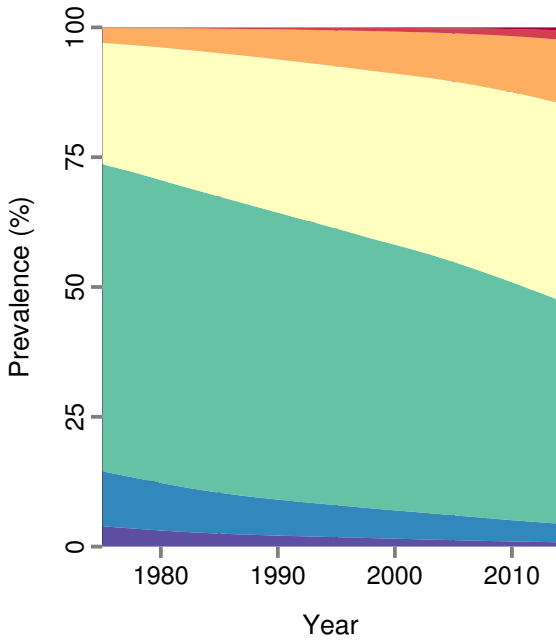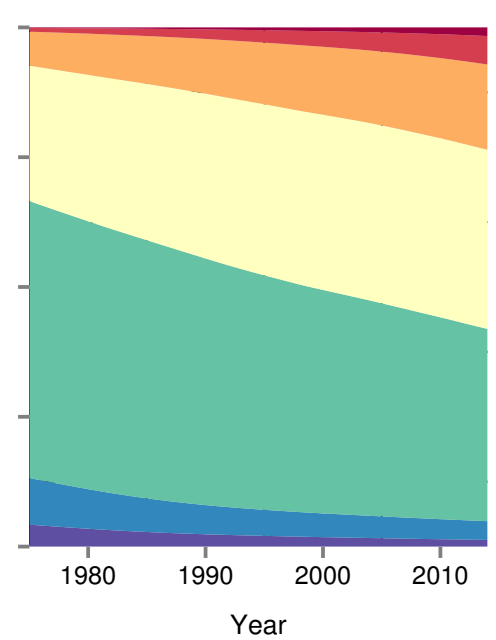

■ BMI <18.5 ■ BMI 18.5-20 ■ BMI 20-25 ■ BMI 25-30 ■ BMI 30-35 ■ BMI 35-40 ■ BMI ≥ 40

# Egypt

Middle East and North Africa

## Men

## Women

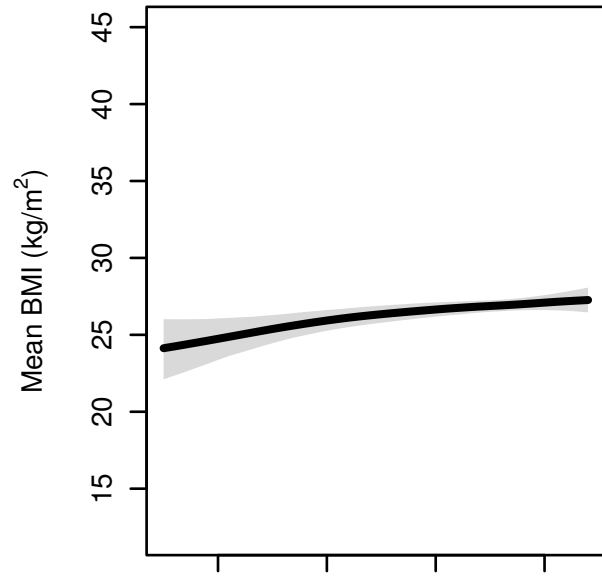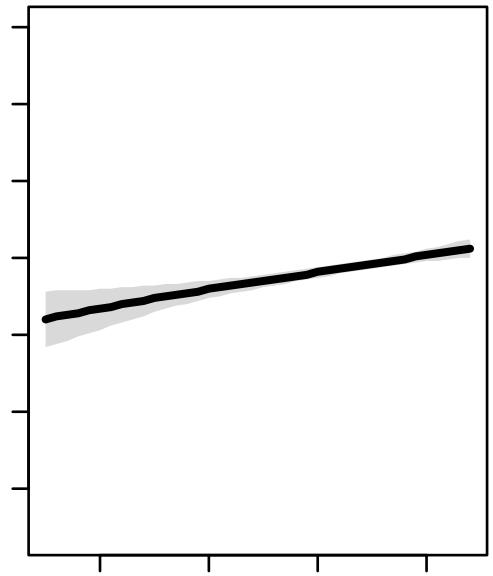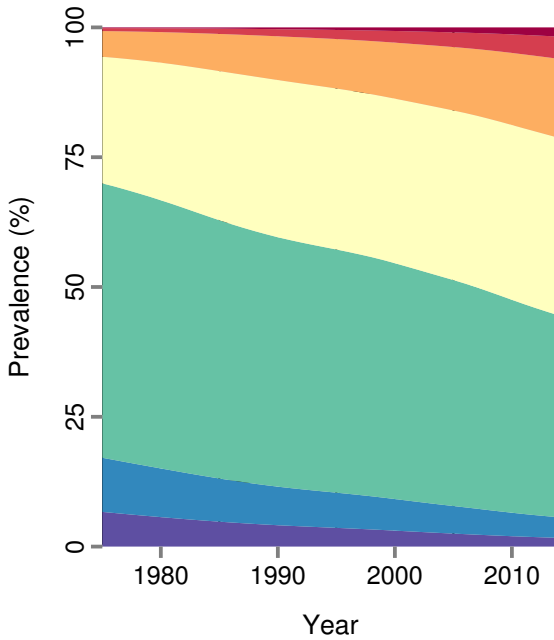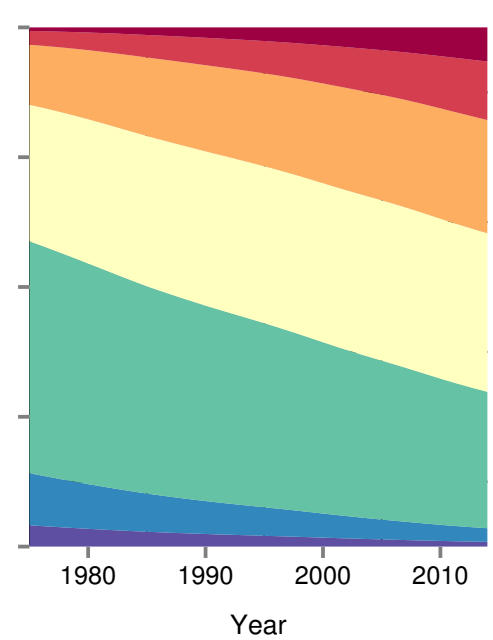

■ BMI <18.5 ■ BMI 18.5-20 ■ BMI 20-25 ■ BMI 25-30 ■ BMI 30-35 ■ BMI 35-40 ■ BMI ≥ 40

El Salvador  
Central Latin America

Men

Women

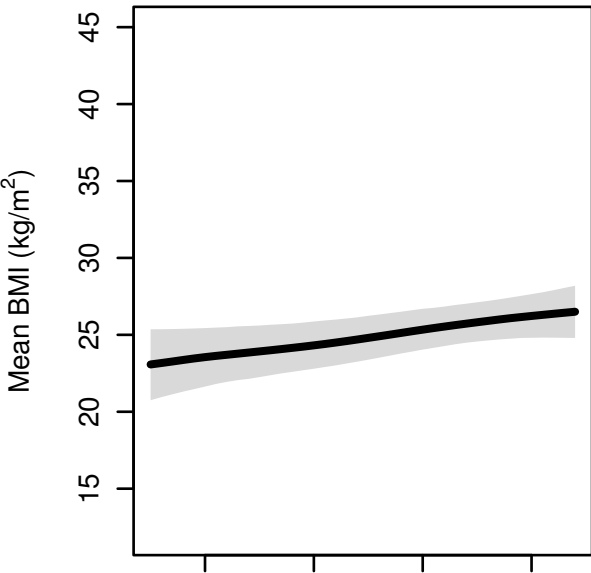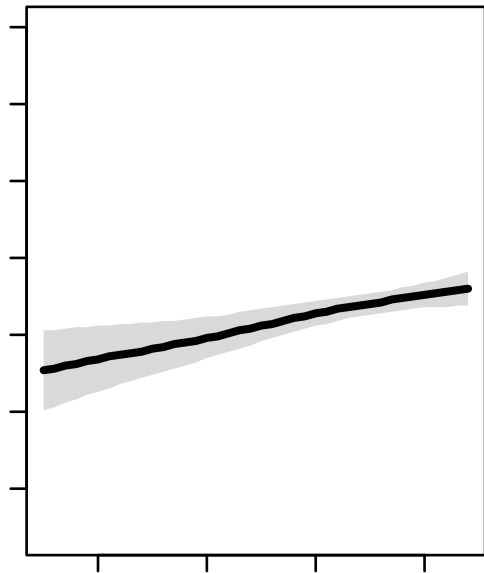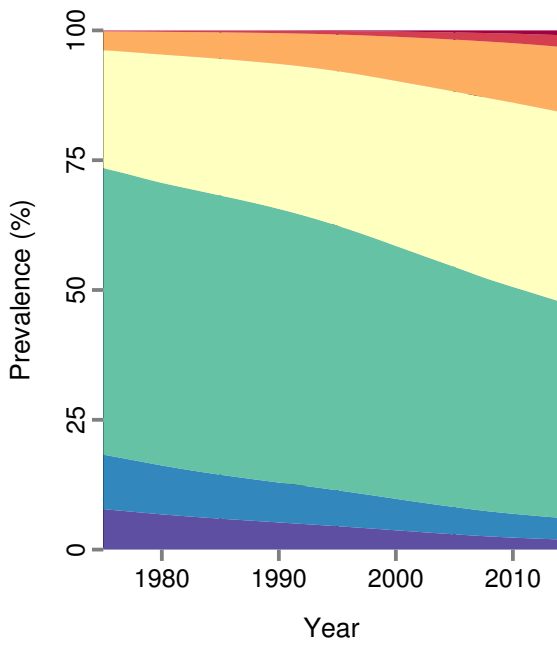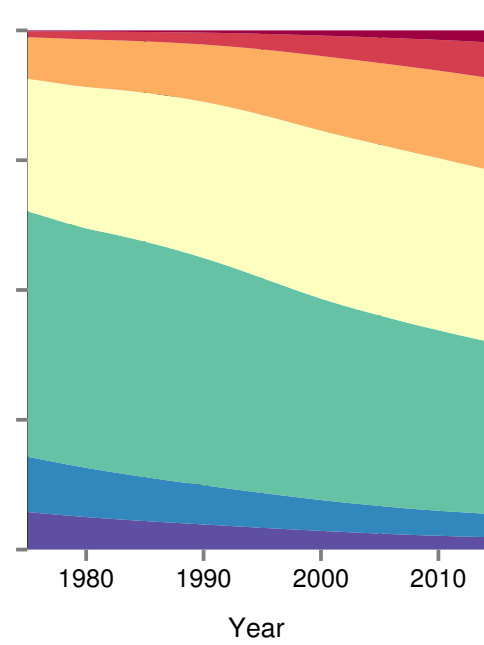

■ BMI <18.5 ■ BMI 18.5-20 ■ BMI 20-25 ■ BMI 25-30 ■ BMI 30-35 ■ BMI 35-40 ■ BMI ≥ 40

# Equatorial Guinea

## Central Africa

### Men

### Women

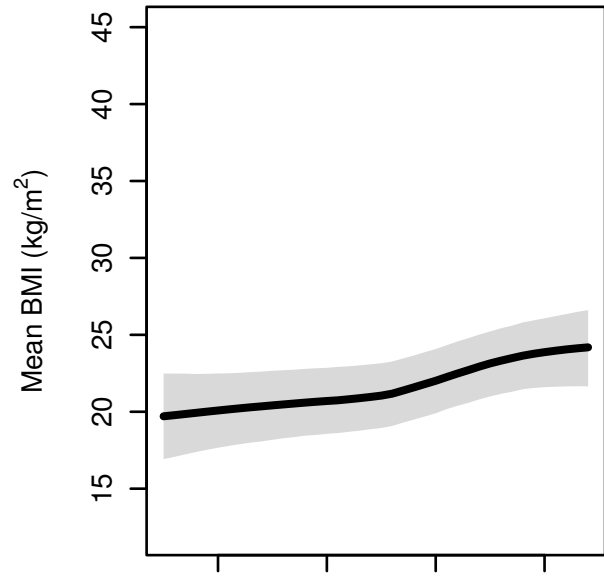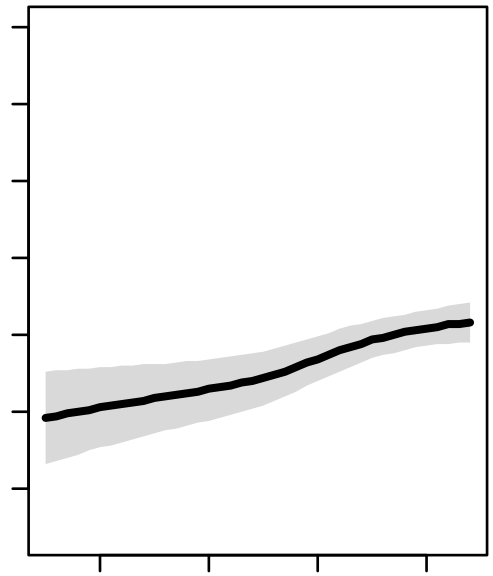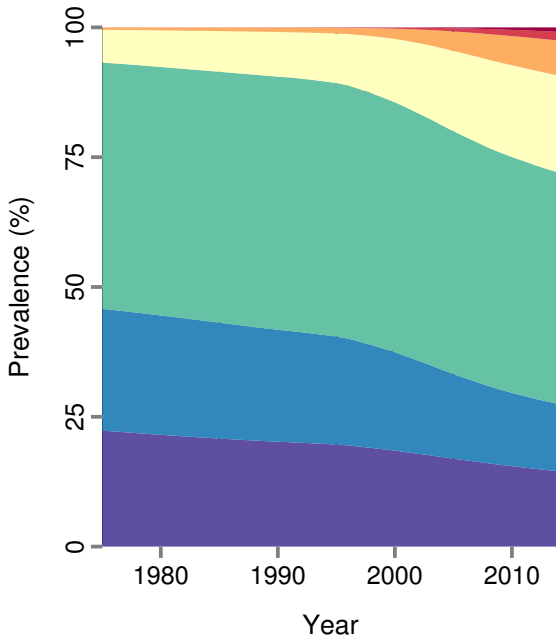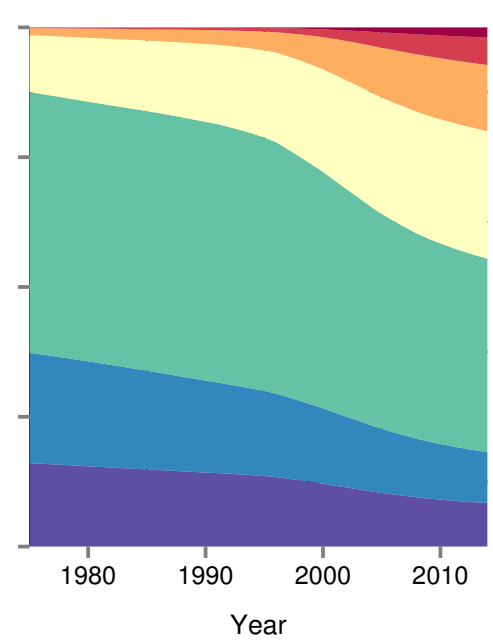

■ BMI <18.5 ■ BMI 18.5-20 ■ BMI 20-25 ■ BMI 25-30 ■ BMI 30-35 ■ BMI 35-40 ■ BMI ≥ 40

Eritrea  
East Africa

Men

Women

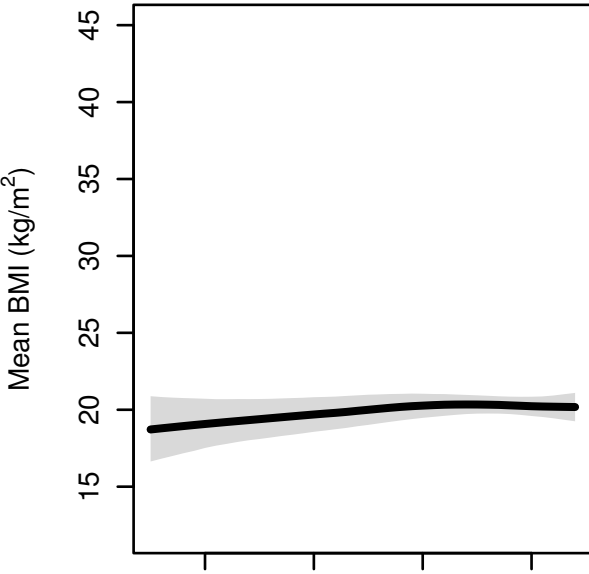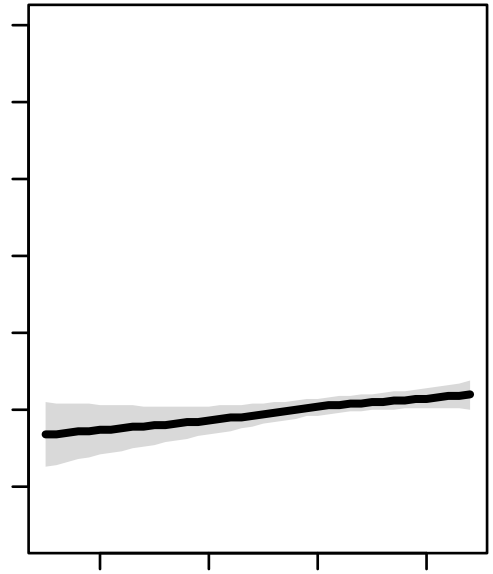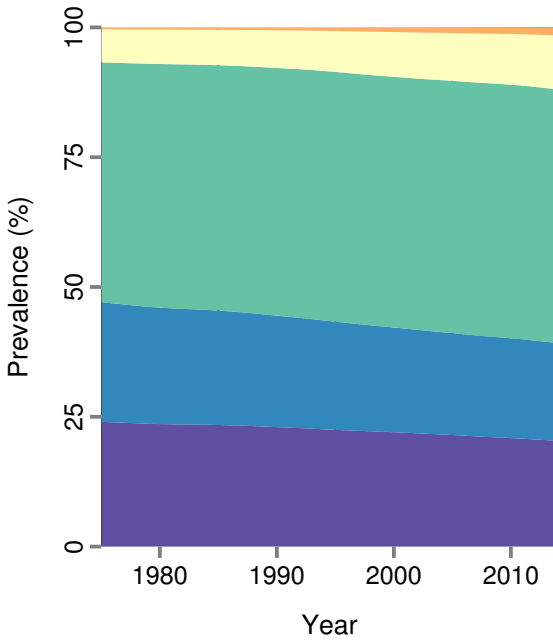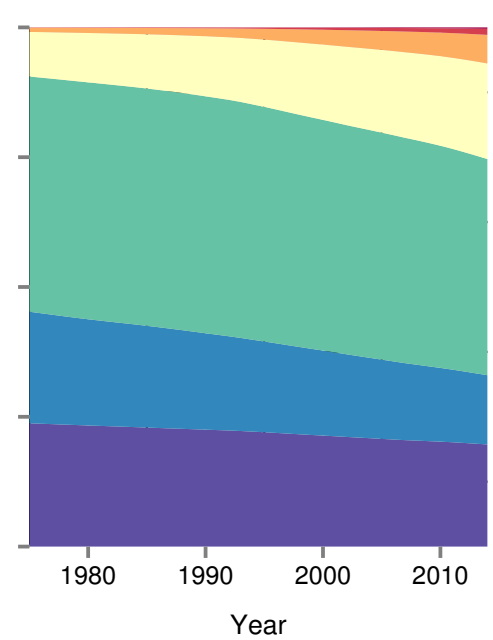

■ BMI <18.5 ■ BMI 18.5-20 ■ BMI 20-25 ■ BMI 25-30 ■ BMI 30-35 ■ BMI 35-40 ■ BMI ≥ 40



Estonia  
Eastern Europe

Men

Women

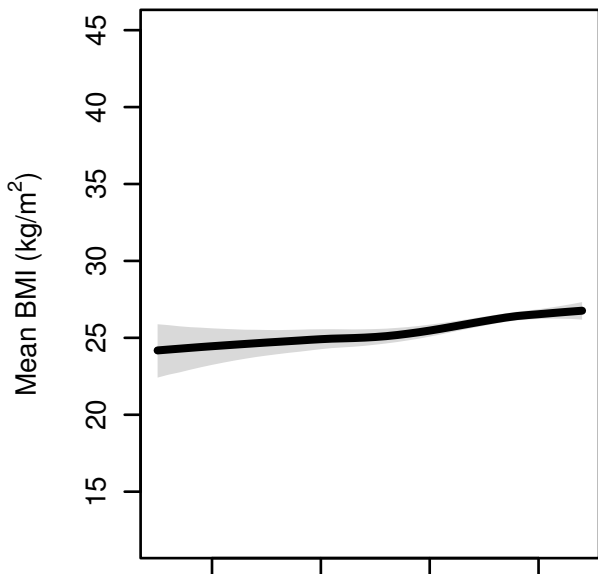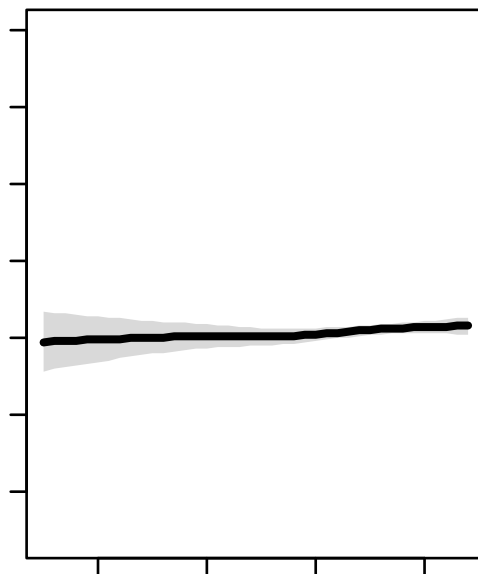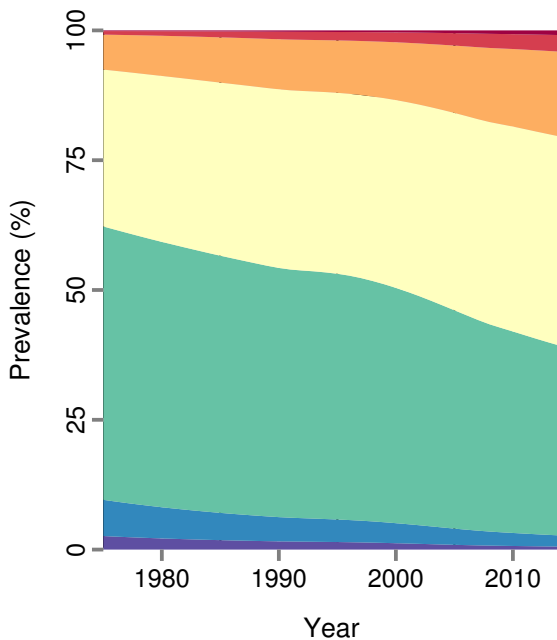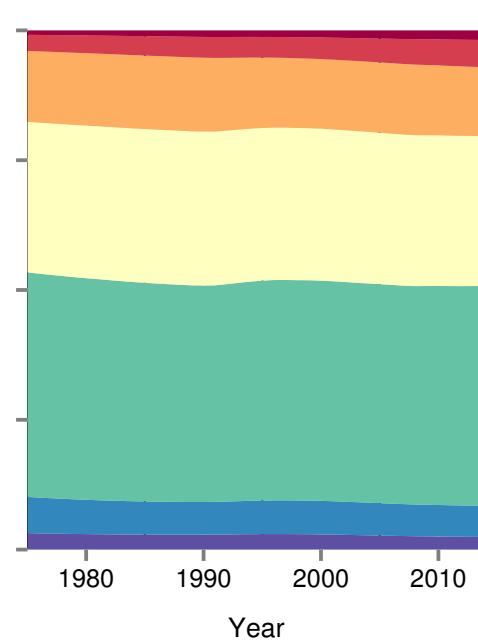

■ BMI <18.5 ■ BMI 18.5-20 ■ BMI 20-25 ■ BMI 25-30 ■ BMI 30-35 ■ BMI 35-40 ■ BMI ≥ 40

Ethiopia  
East Africa

Men

Women

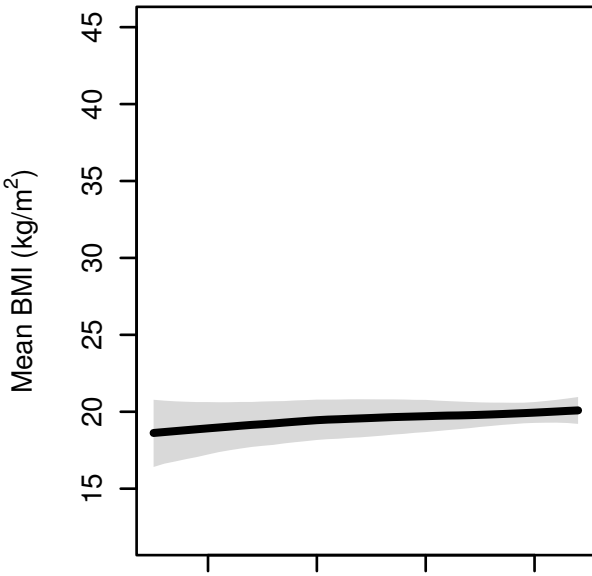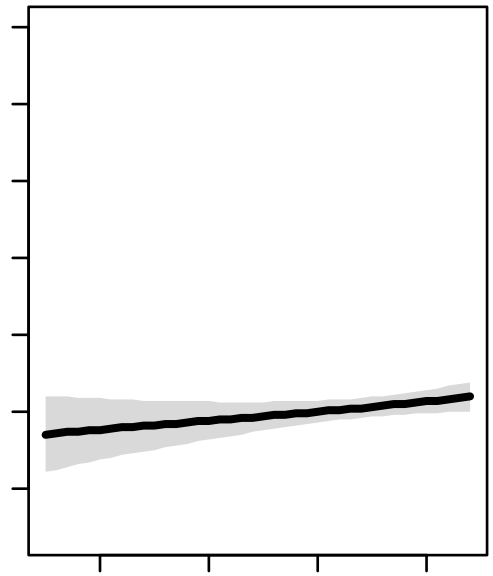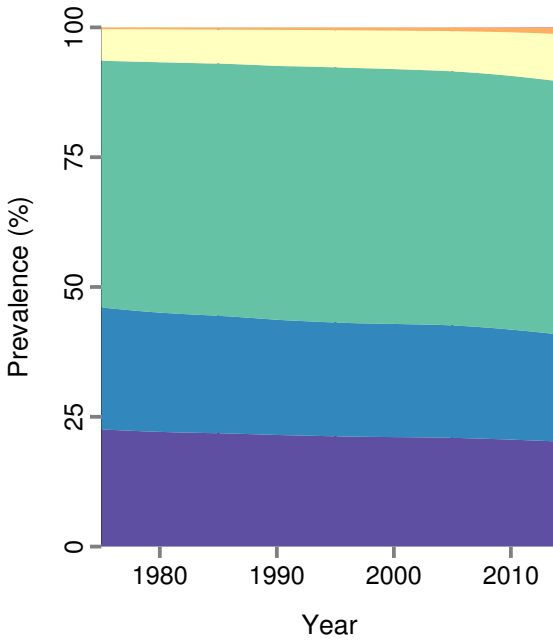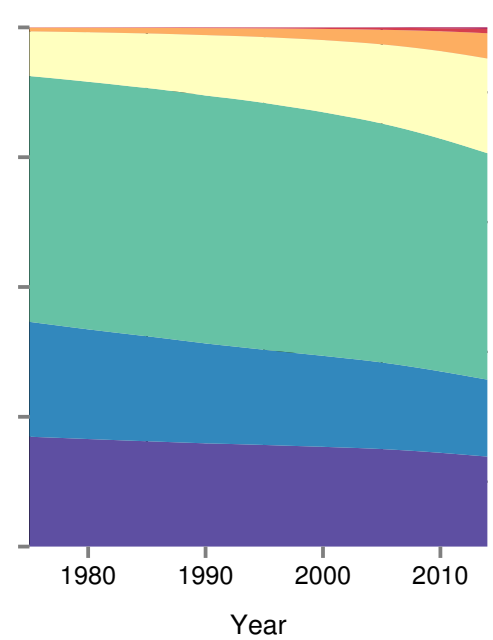

■ BMI <18.5 ■ BMI 18.5-20 ■ BMI 20-25 ■ BMI 25-30 ■ BMI 30-35 ■ BMI 35-40 ■ BMI ≥ 40

Fiji  
Melanesia

Men

Women

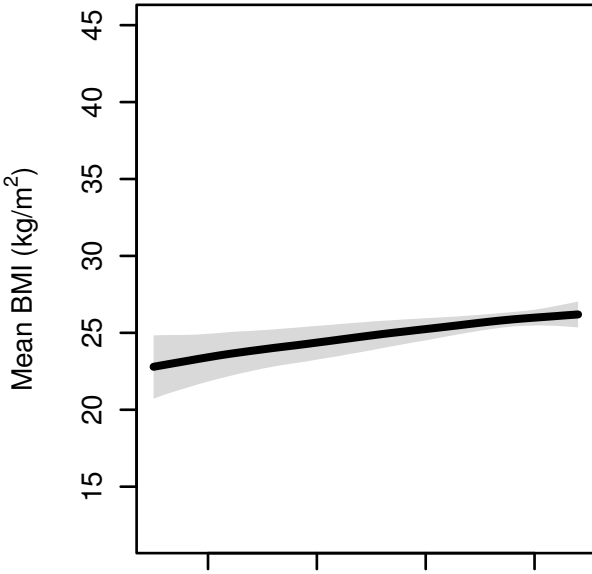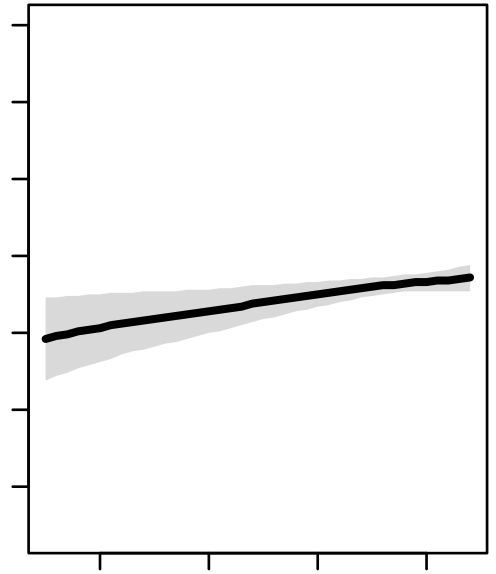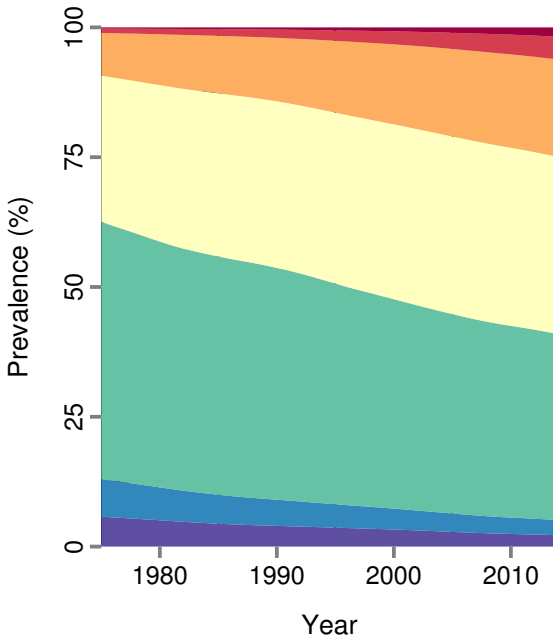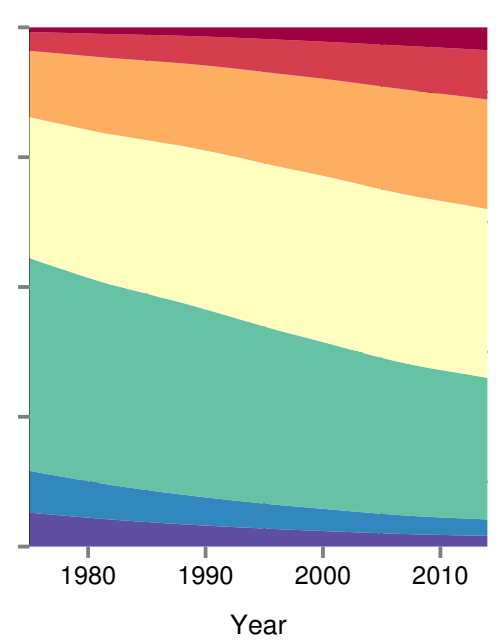

■ BMI <18.5 ■ BMI 18.5-20 ■ BMI 20-25 ■ BMI 25-30 ■ BMI 30-35 ■ BMI 35-40 ■ BMI ≥ 40

Finland  
North Western Europe

Men

Women

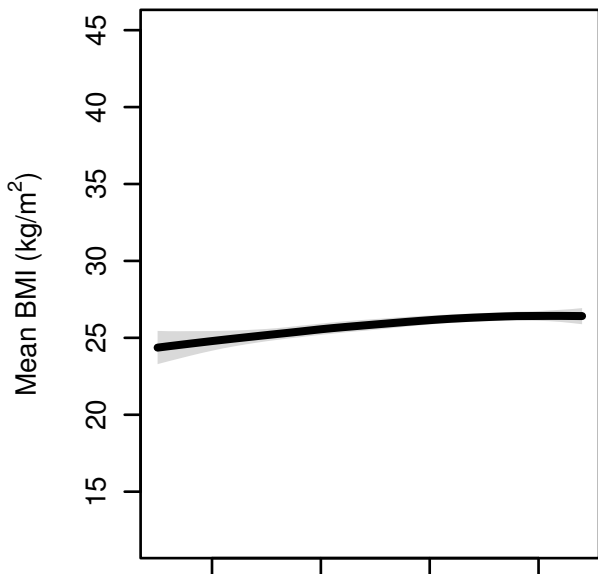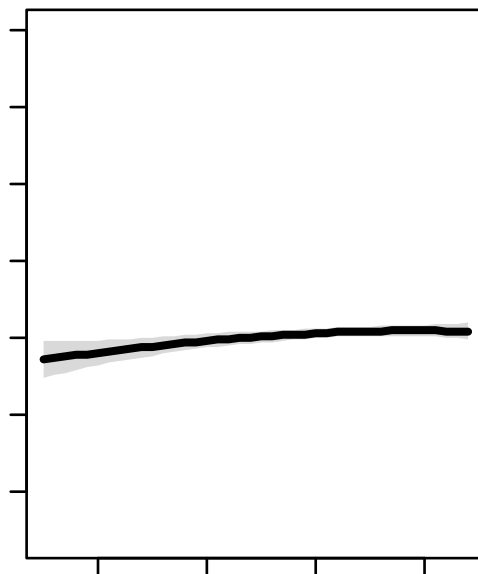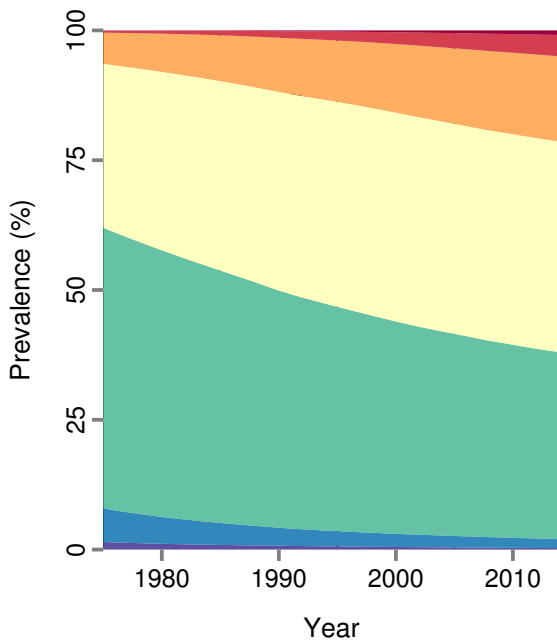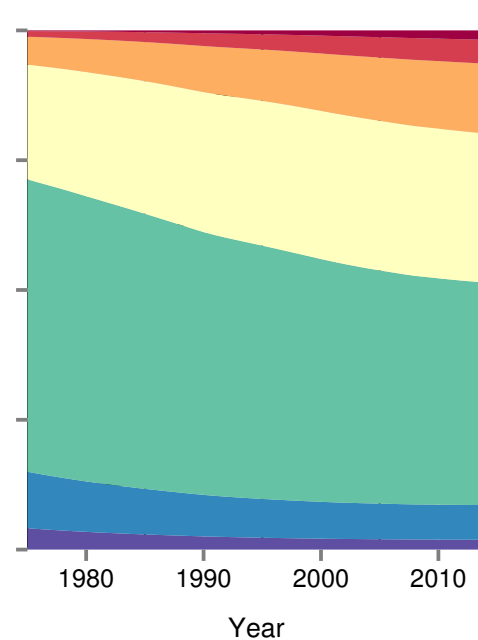

■ BMI <18.5 ■ BMI 18.5-20 ■ BMI 20-25 ■ BMI 25-30 ■ BMI 30-35 ■ BMI 35-40 ■ BMI ≥ 40

France  
South Western Europe

Men

Women

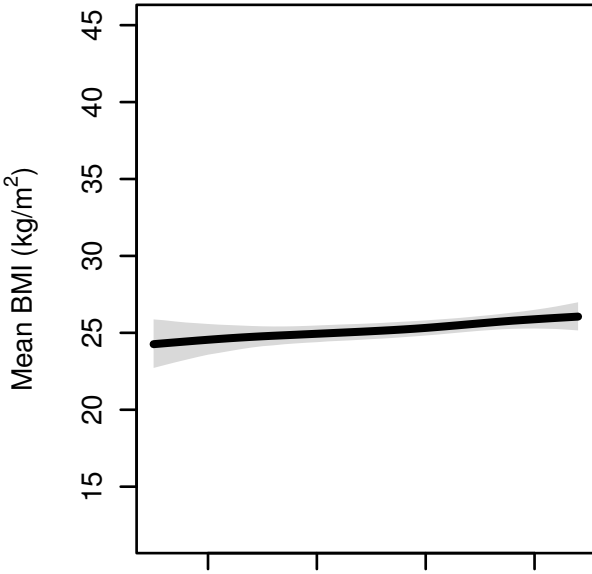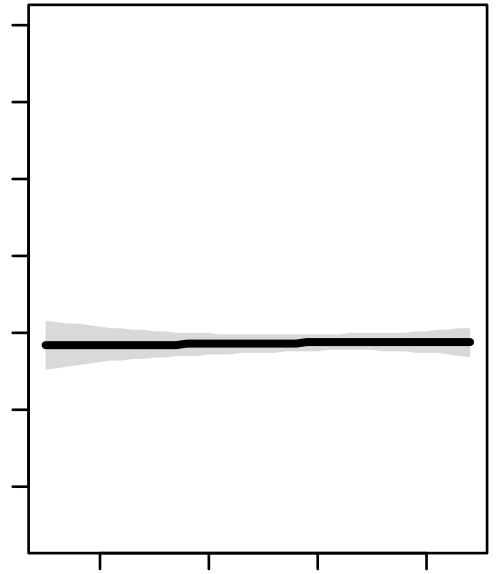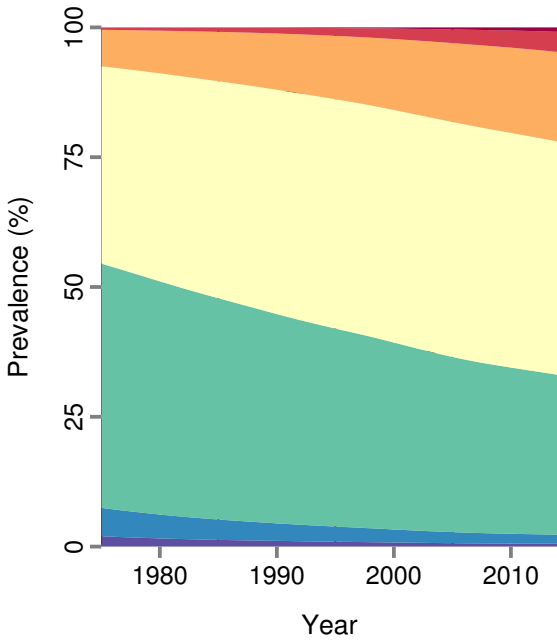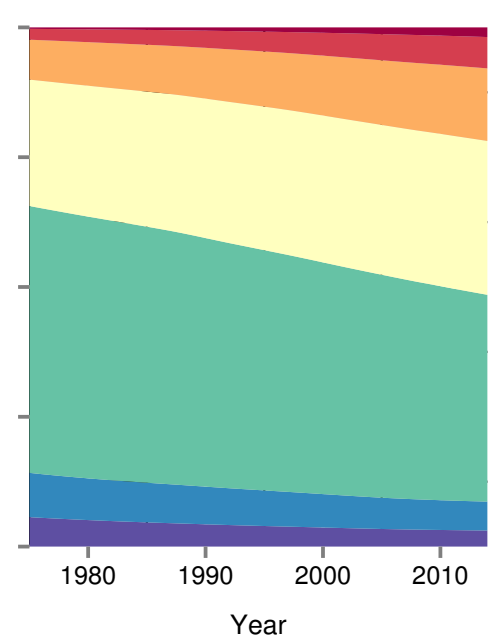

■ BMI <18.5 ■ BMI 18.5-20 ■ BMI 20-25 ■ BMI 25-30 ■ BMI 30-35 ■ BMI 35-40 ■ BMI ≥ 40

# French Polynesia Polynesia and Micronesia

## Men

## Women

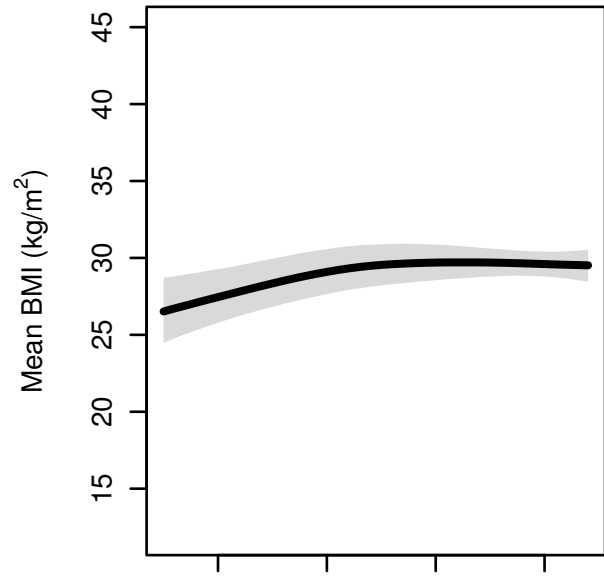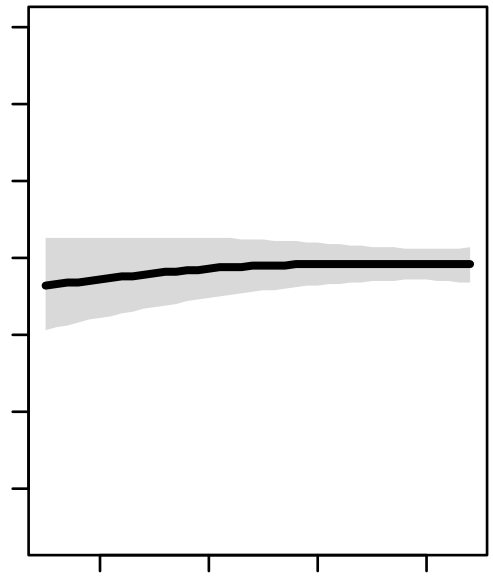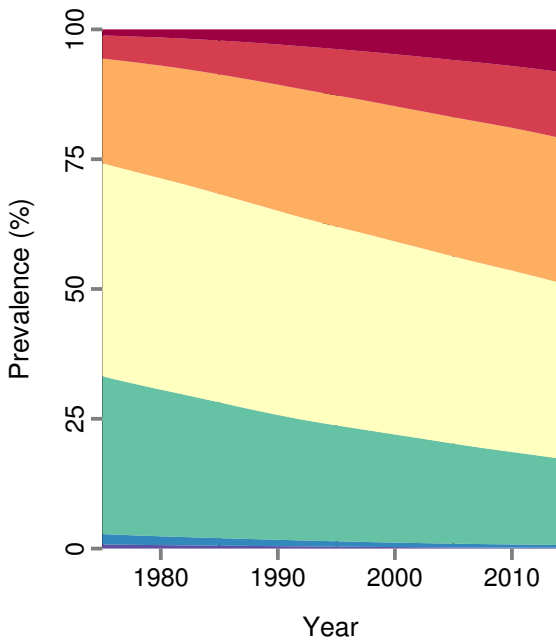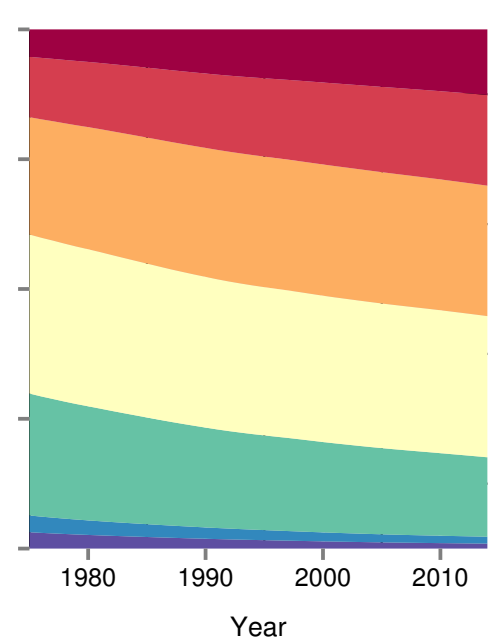

BMI <18.5
  BMI 18.5-20
  BMI 20-25
  BMI 25-30
  BMI 30-35
  BMI 35-40
  BMI ≥ 40

Gabon  
Central Africa

Men

Women

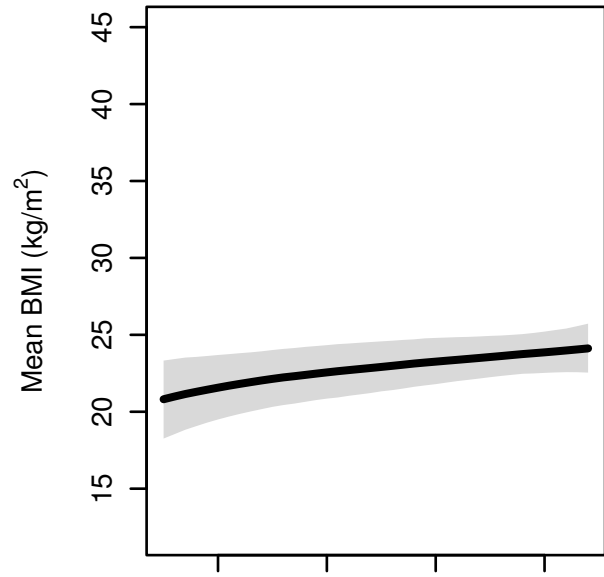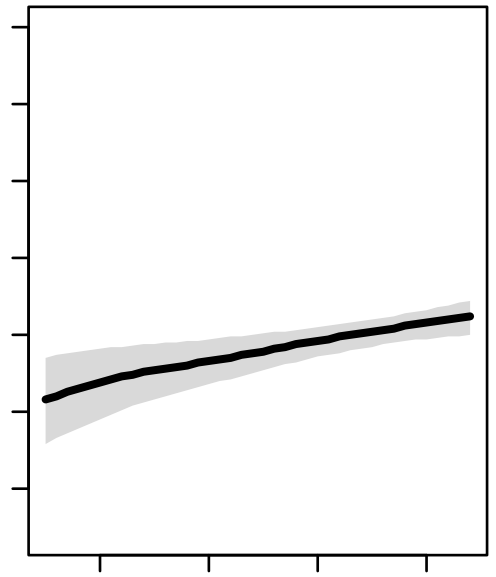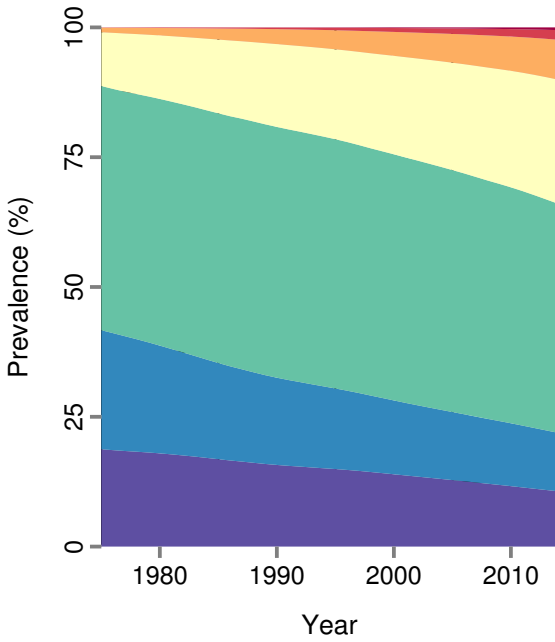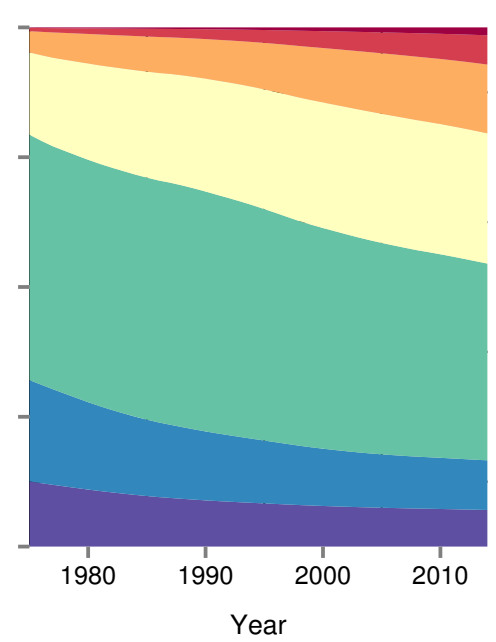

■ BMI <18.5 ■ BMI 18.5-20 ■ BMI 20-25 ■ BMI 25-30 ■ BMI 30-35 ■ BMI 35-40 ■ BMI ≥ 40

Gambia  
West Africa

Men

Women

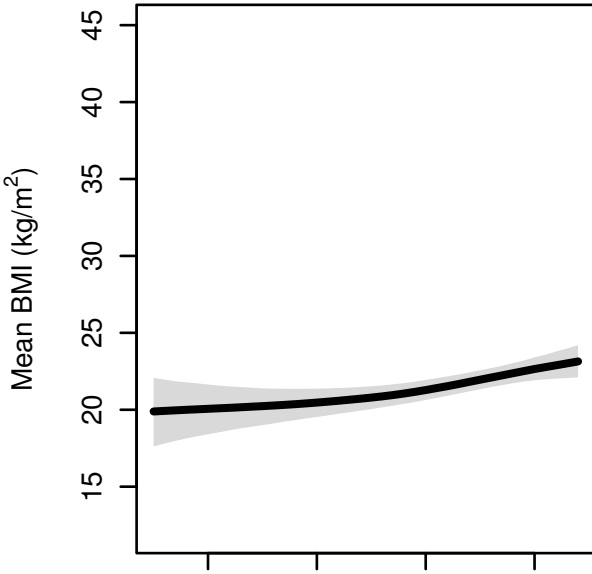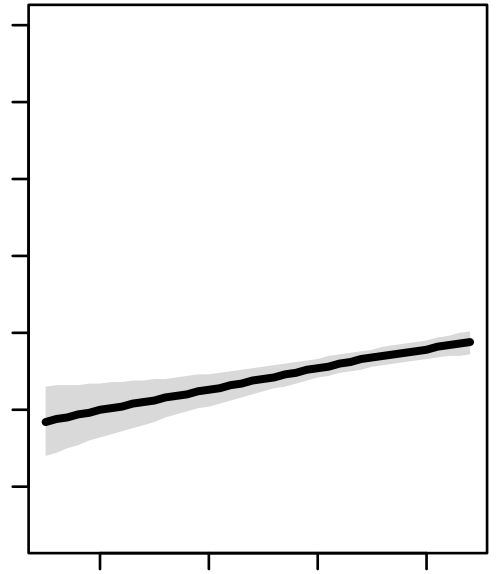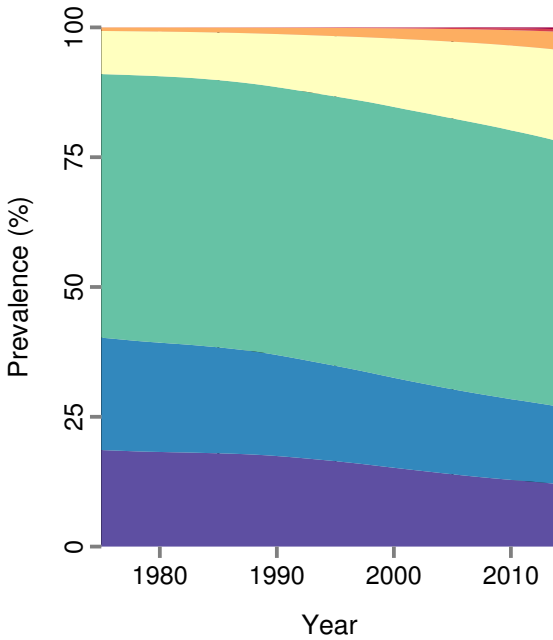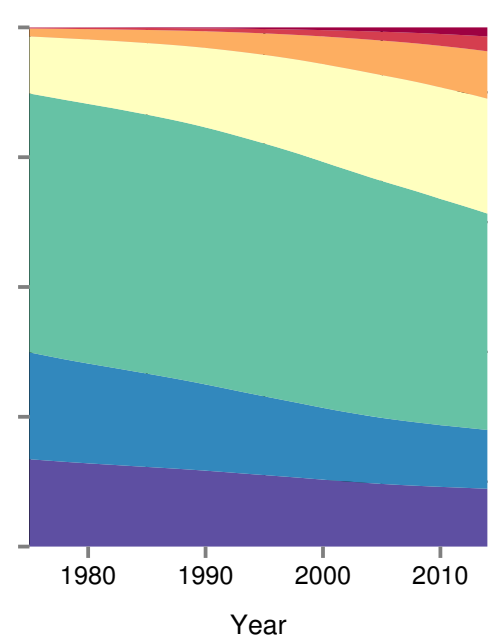

■ BMI <18.5 ■ BMI 18.5-20 ■ BMI 20-25 ■ BMI 25-30 ■ BMI 30-35 ■ BMI 35-40 ■ BMI ≥ 40



Georgia  
Central Asia

Men

Women

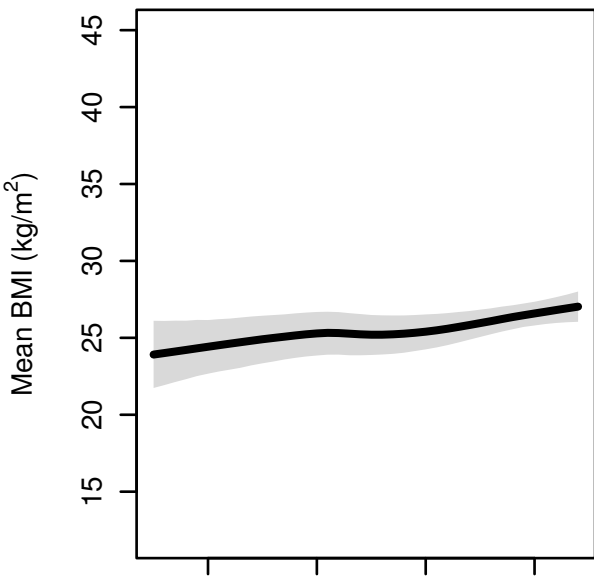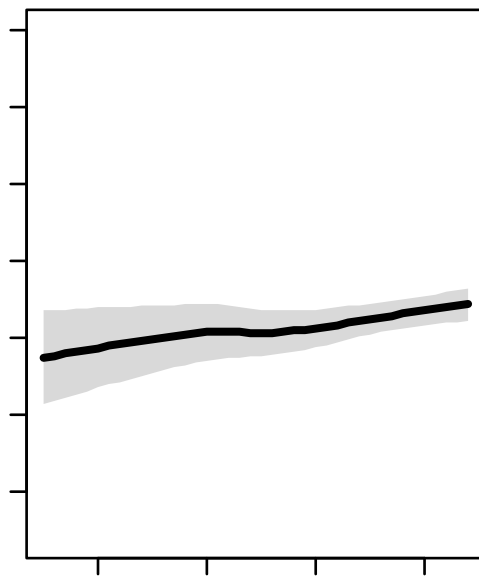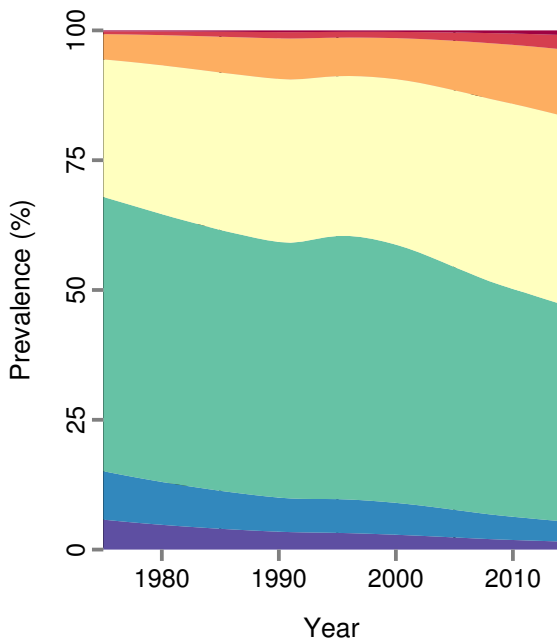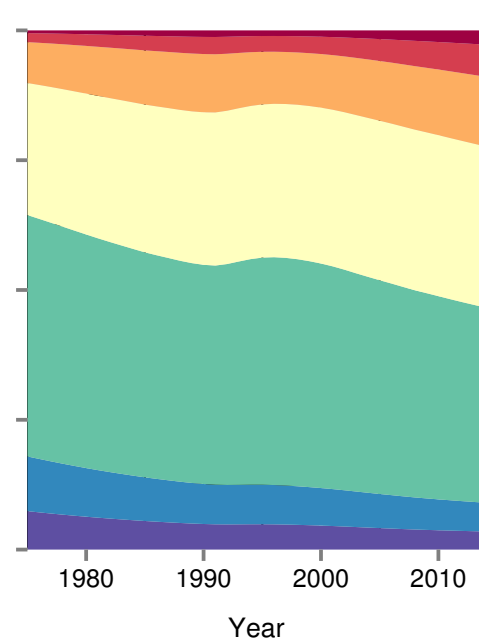

■ BMI <18.5 ■ BMI 18.5-20 ■ BMI 20-25 ■ BMI 25-30 ■ BMI 30-35 ■ BMI 35-40 ■ BMI ≥ 40

Germany  
North Western Europe

Men

Women

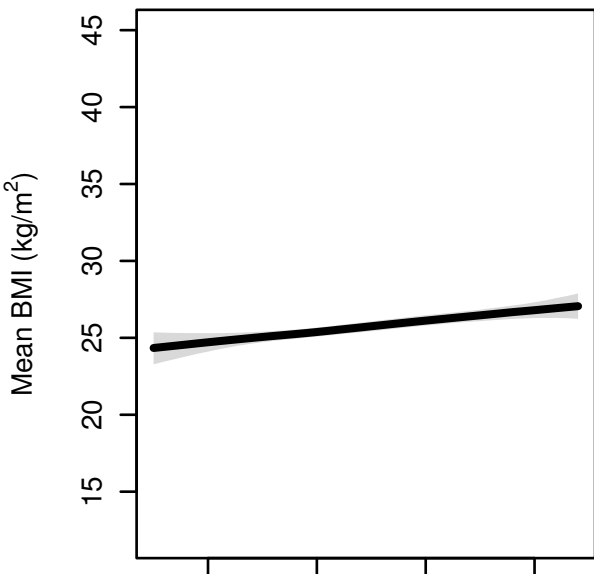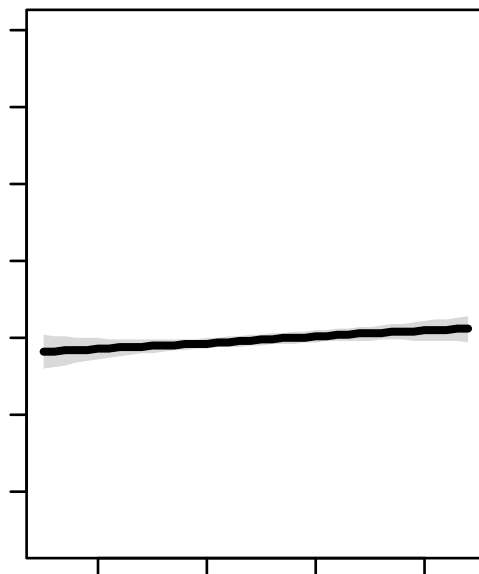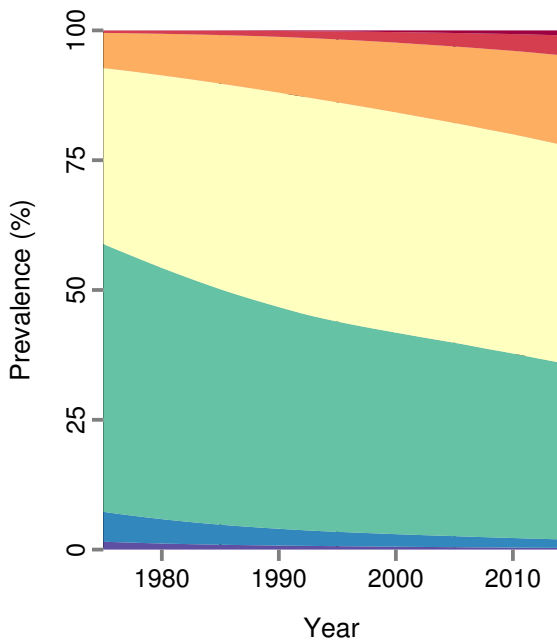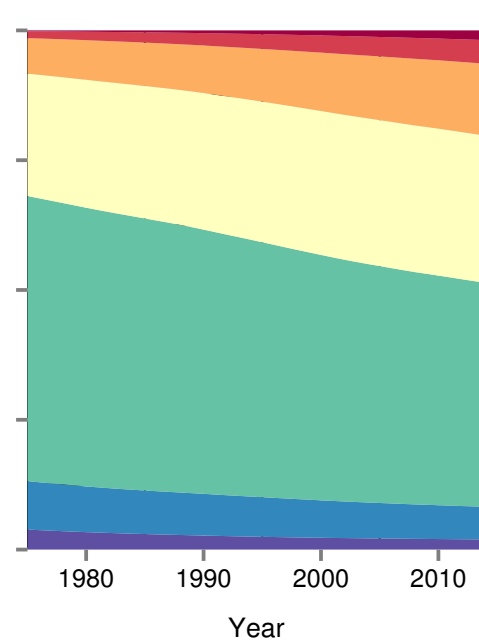

■ BMI <18.5 ■ BMI 18.5-20 ■ BMI 20-25 ■ BMI 25-30 ■ BMI 30-35 ■ BMI 35-40 ■ BMI ≥ 40

Ghana  
West Africa

Men

Women

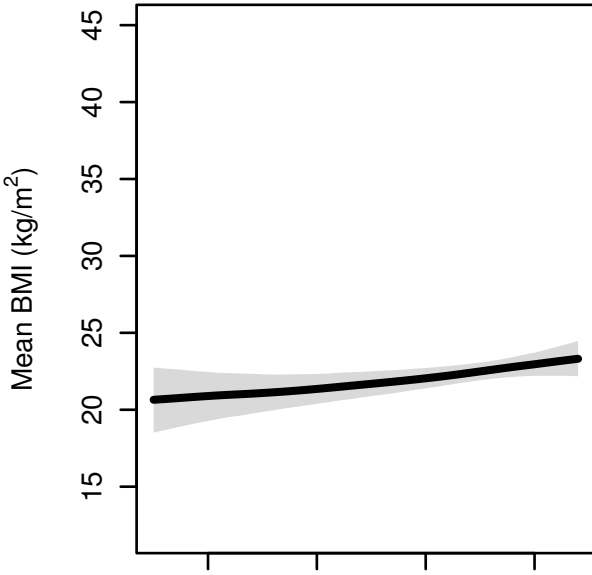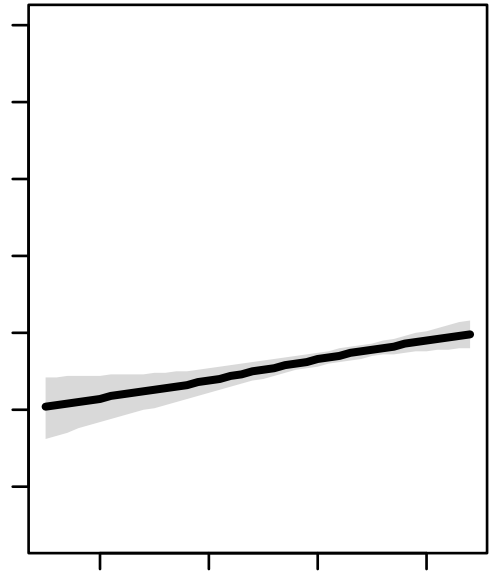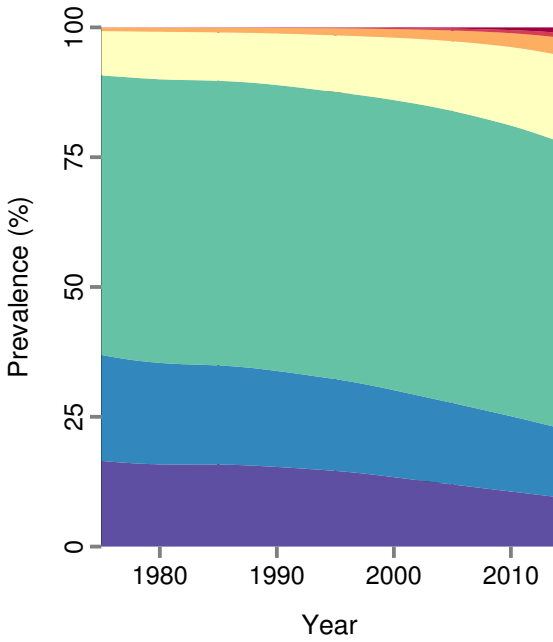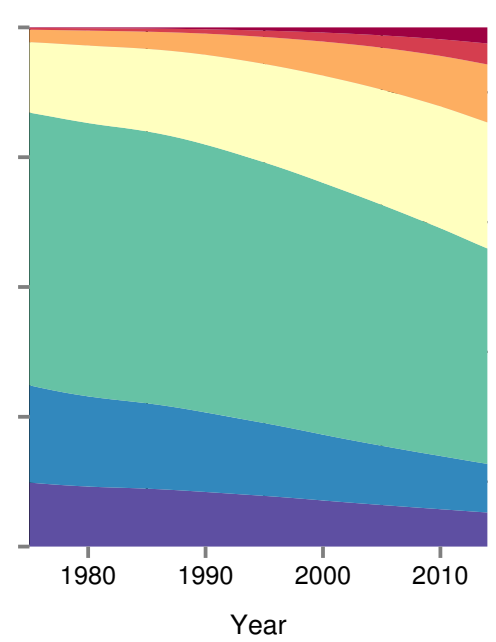

■ BMI <18.5 ■ BMI 18.5-20 ■ BMI 20-25 ■ BMI 25-30 ■ BMI 30-35 ■ BMI 35-40 ■ BMI ≥ 40

Greece  
South Western Europe

Men

Women

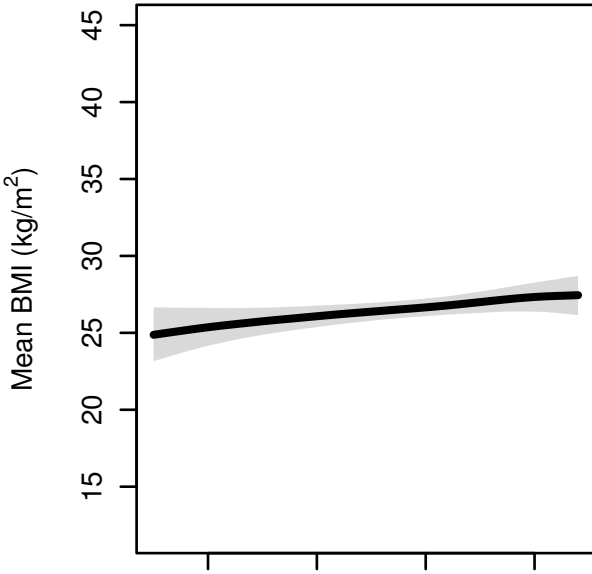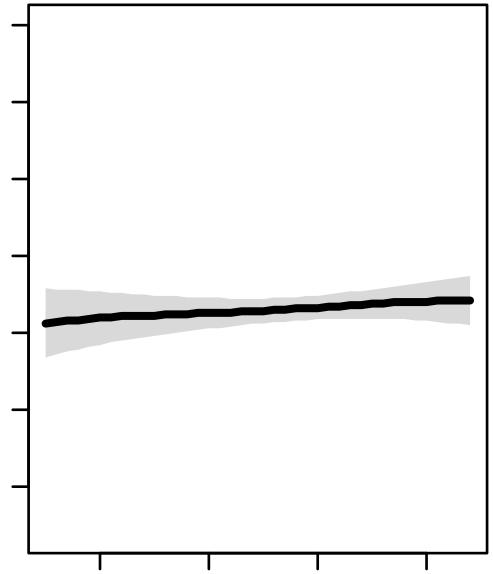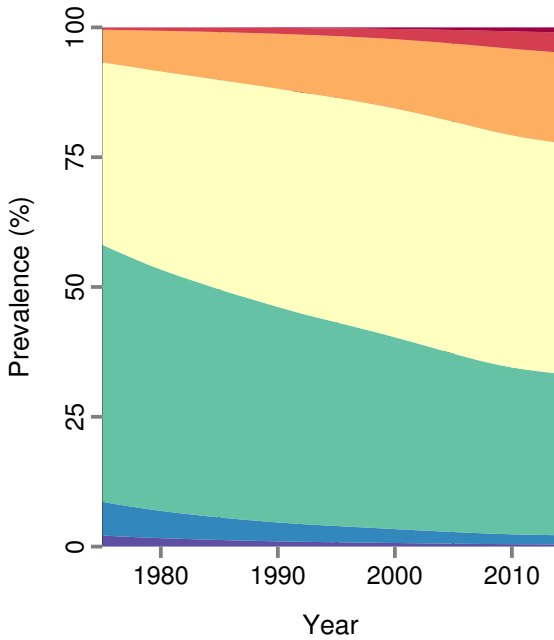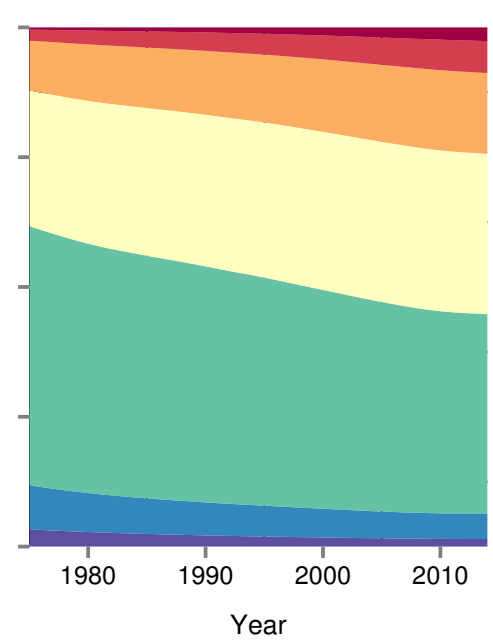

■ BMI <18.5 ■ BMI 18.5-20 ■ BMI 20-25 ■ BMI 25-30 ■ BMI 30-35 ■ BMI 35-40 ■ BMI ≥ 40

Greenland  
North Western Europe

Men

Women

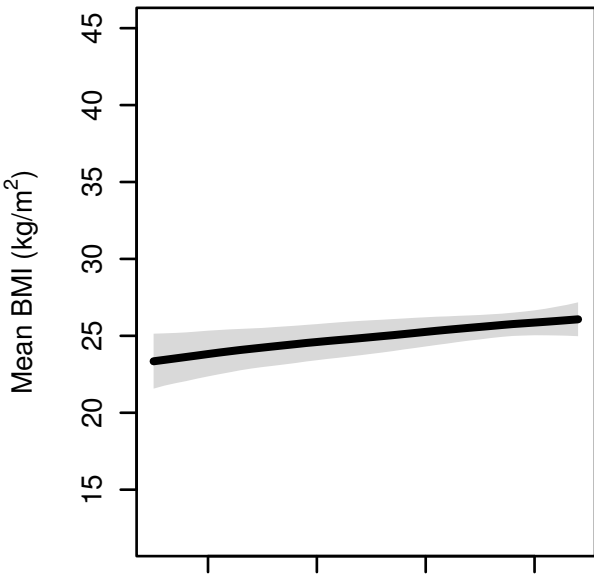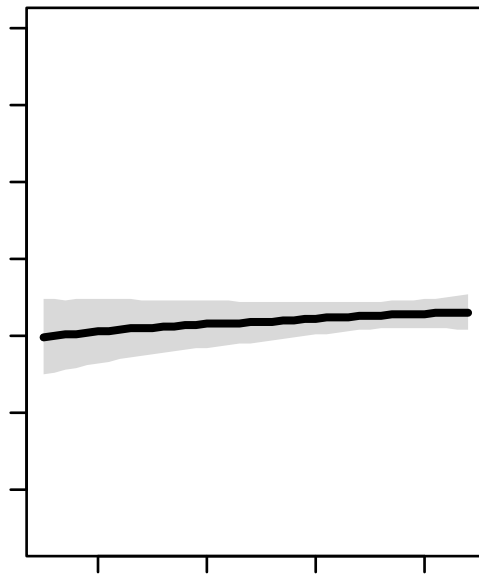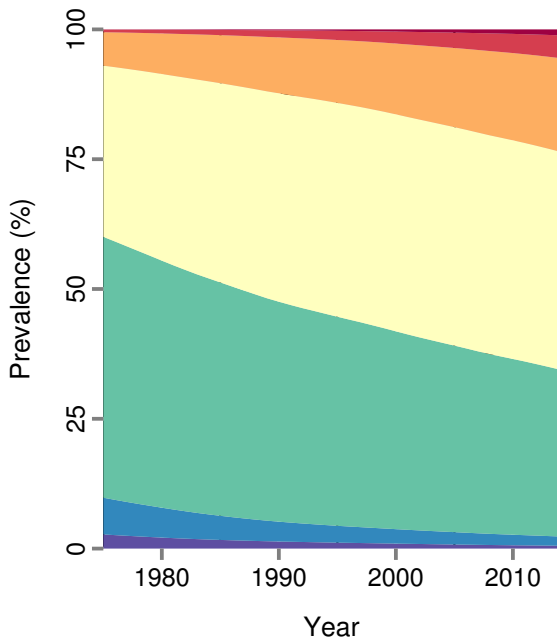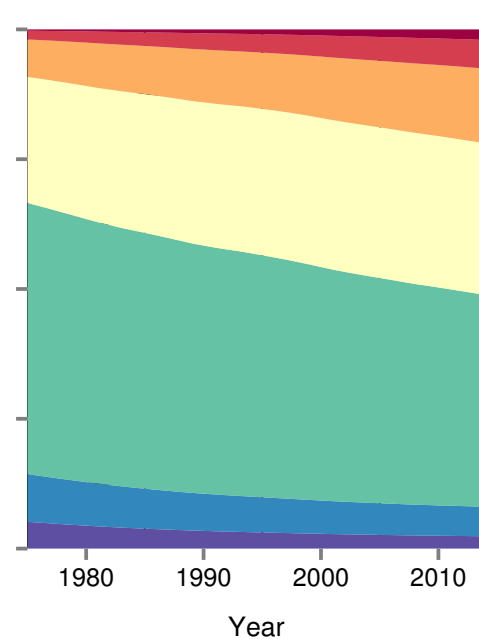

■ BMI <18.5 ■ BMI 18.5-20 ■ BMI 20-25 ■ BMI 25-30 ■ BMI 30-35 ■ BMI 35-40 ■ BMI ≥ 40

Grenada  
Caribbean

Men

Women

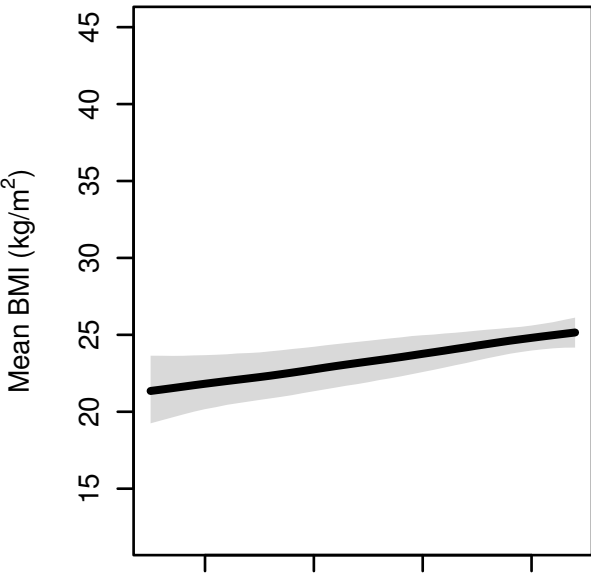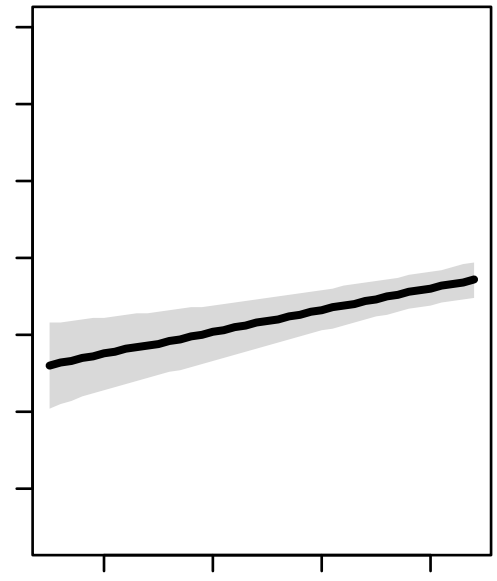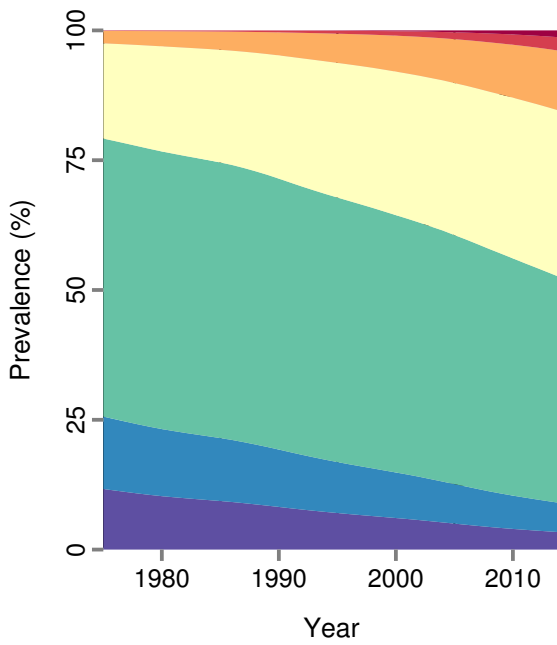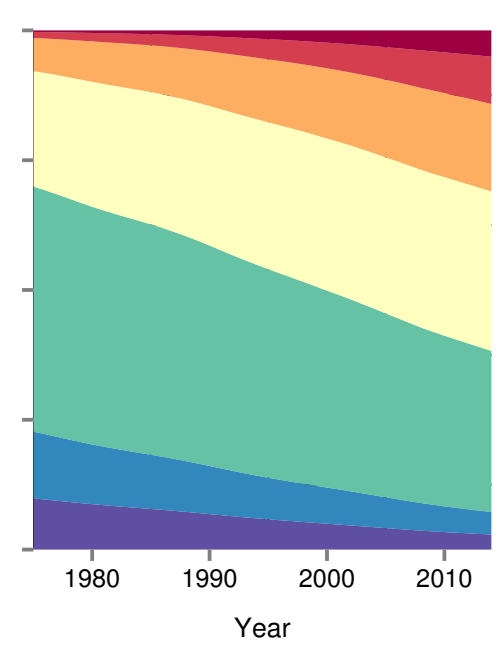

■ BMI <18.5 ■ BMI 18.5-20 ■ BMI 20-25 ■ BMI 25-30 ■ BMI 30-35 ■ BMI 35-40 ■ BMI ≥ 40

Guatemala  
Central Latin America

Men

Women

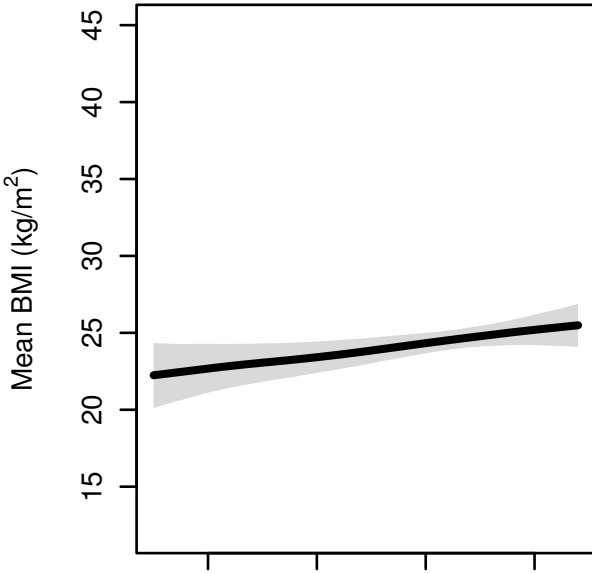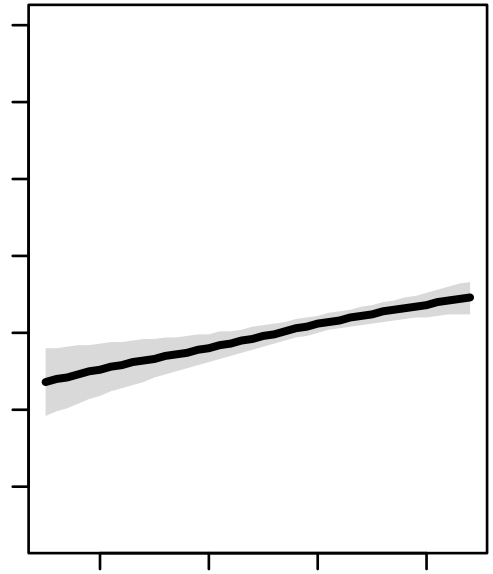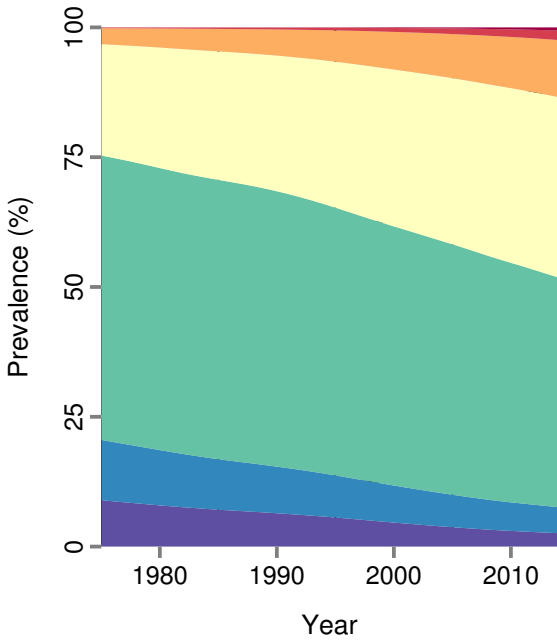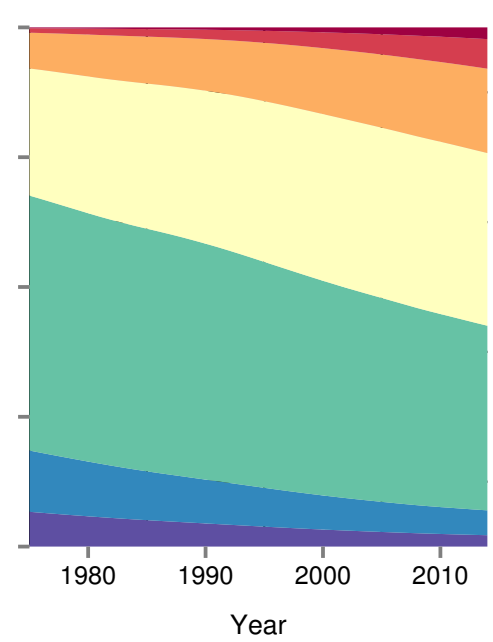

■ BMI <18.5 ■ BMI 18.5-20 ■ BMI 20-25 ■ BMI 25-30 ■ BMI 30-35 ■ BMI 35-40 ■ BMI ≥ 40

Guinea  
West Africa

Men

Women

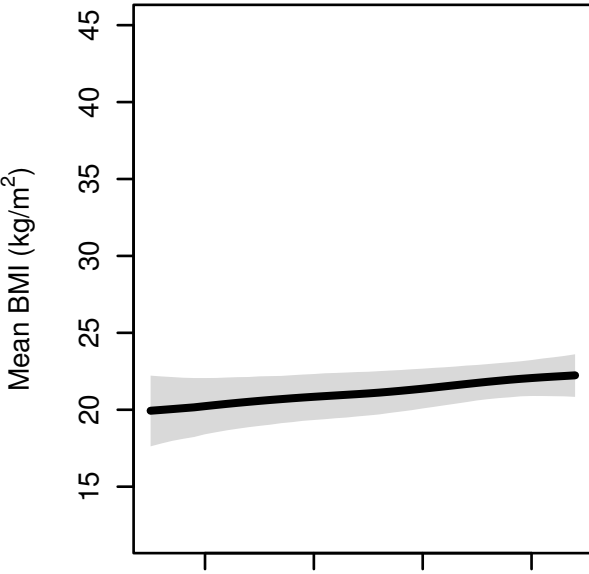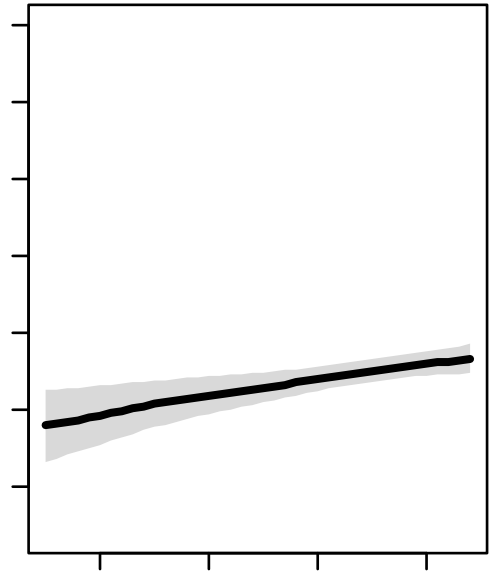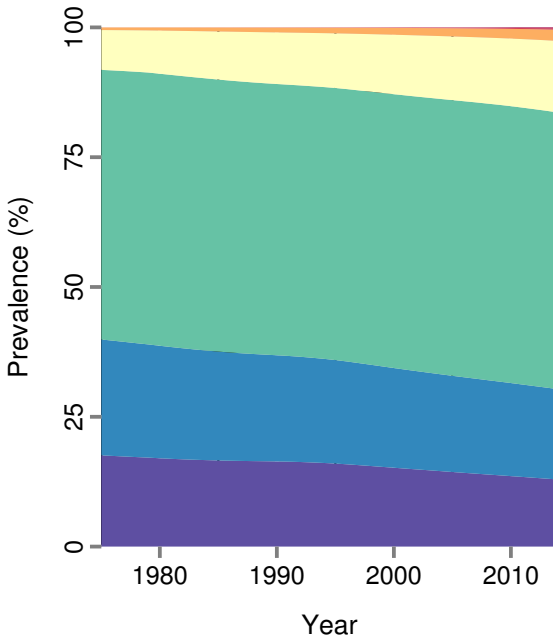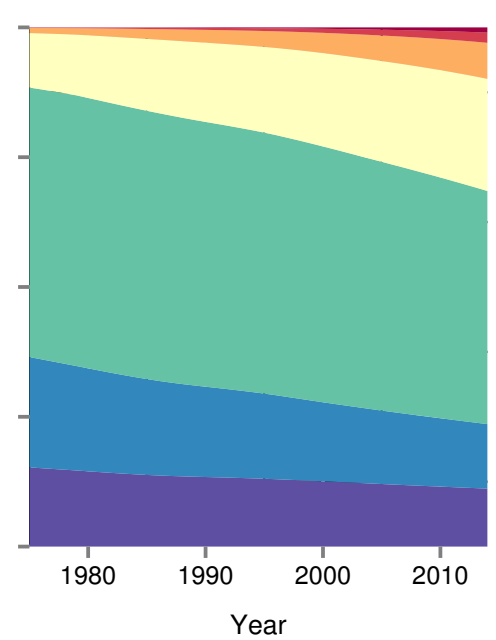

■ BMI <18.5 ■ BMI 18.5-20 ■ BMI 20-25 ■ BMI 25-30 ■ BMI 30-35 ■ BMI 35-40 ■ BMI ≥ 40



# Guinea Bissau

## West Africa

### Men

### Women

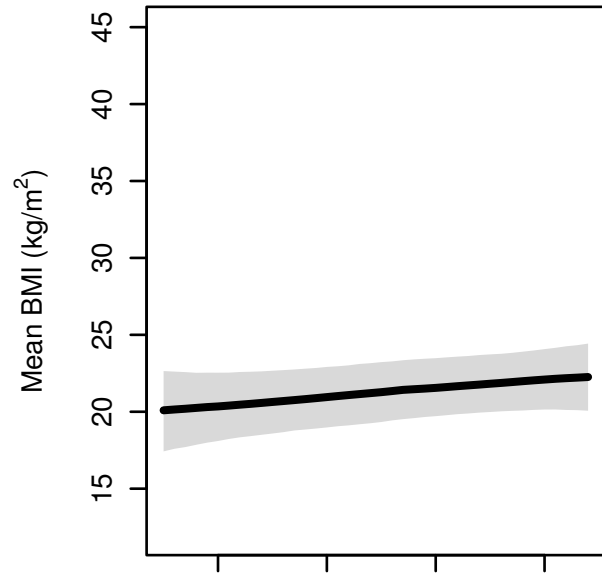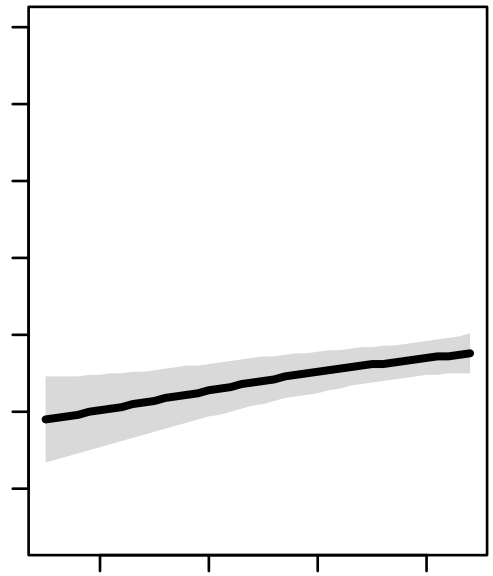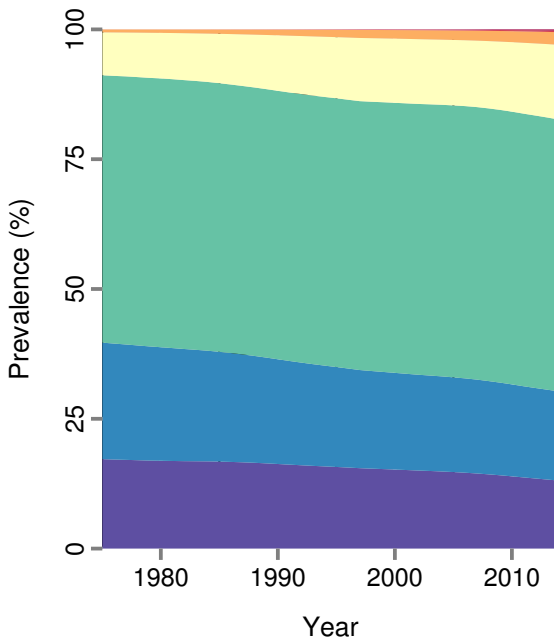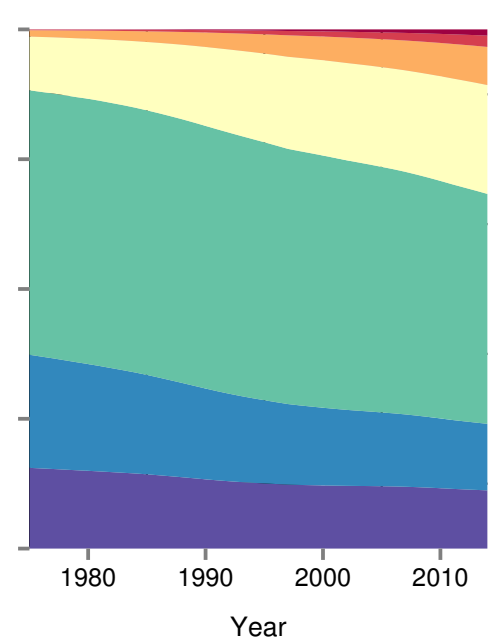

■ BMI <18.5 ■ BMI 18.5-20 ■ BMI 20-25 ■ BMI 25-30 ■ BMI 30-35 ■ BMI 35-40 ■ BMI ≥ 40

Guyana  
Caribbean

Men

Women

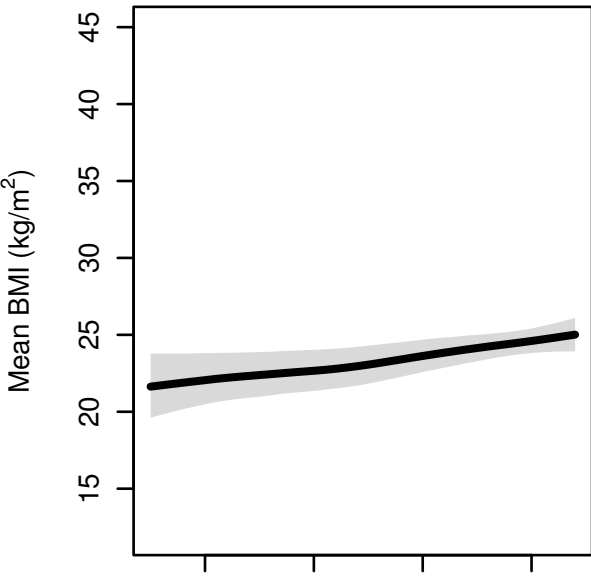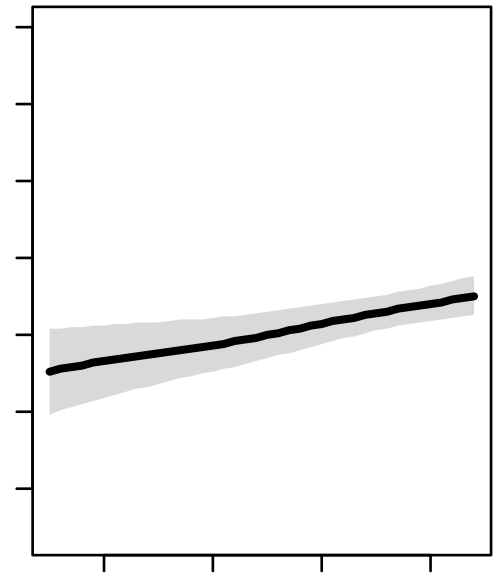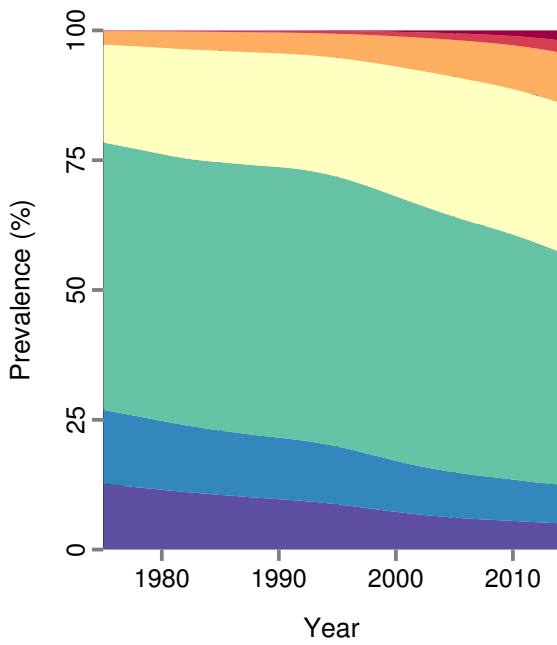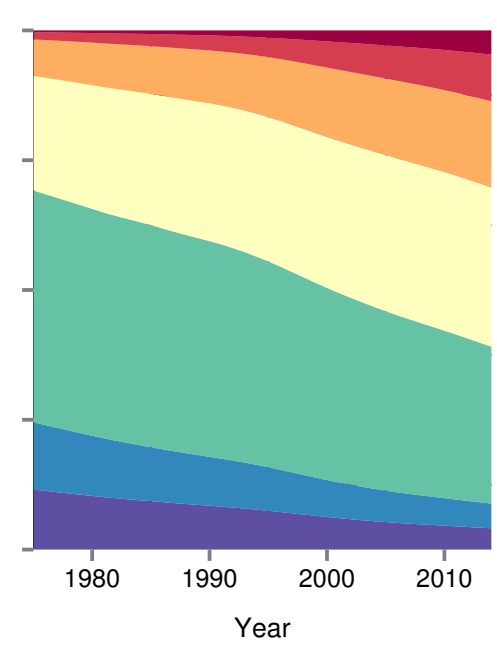

■ BMI <18.5 ■ BMI 18.5-20 ■ BMI 20-25 ■ BMI 25-30 ■ BMI 30-35 ■ BMI 35-40 ■ BMI ≥ 40

Haiti  
Caribbean

Men

Women

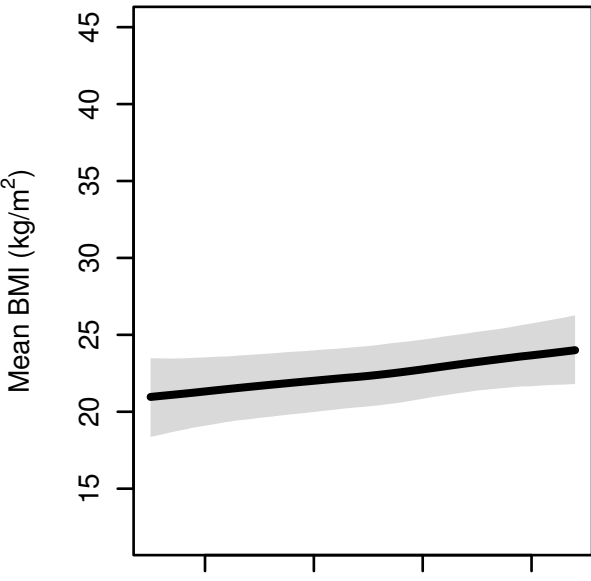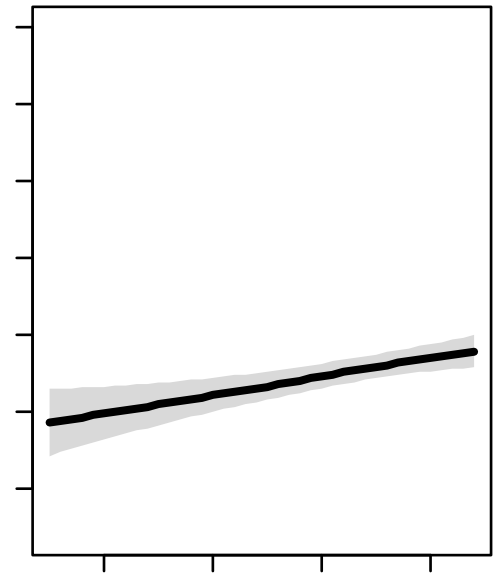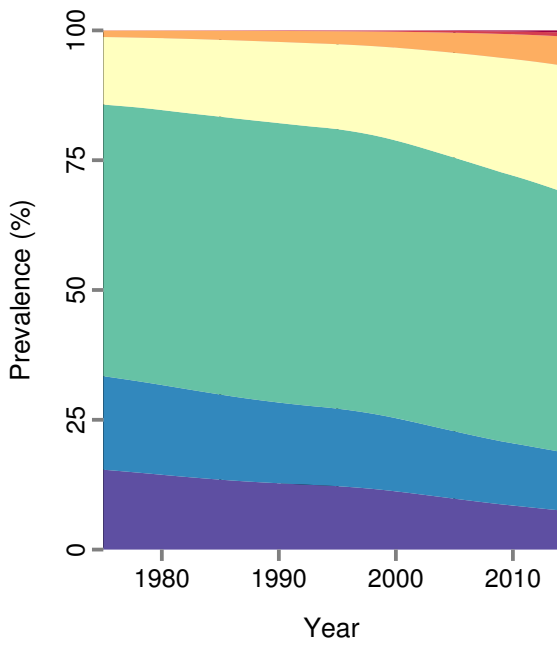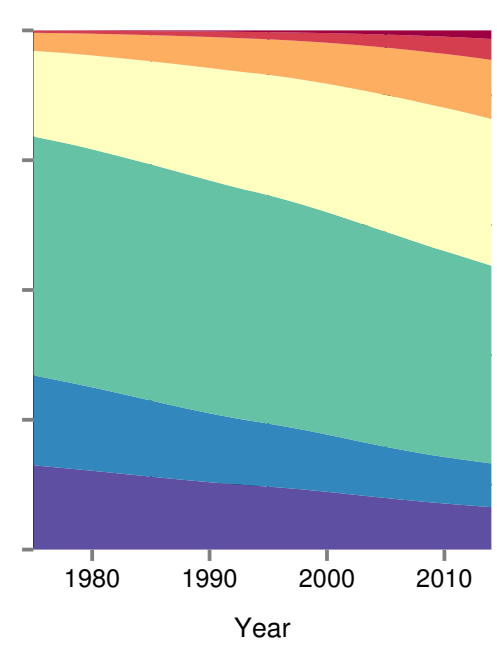

■ BMI <18.5 ■ BMI 18.5-20 ■ BMI 20-25 ■ BMI 25-30 ■ BMI 30-35 ■ BMI 35-40 ■ BMI ≥ 40

Honduras  
Central Latin America

Men

Women

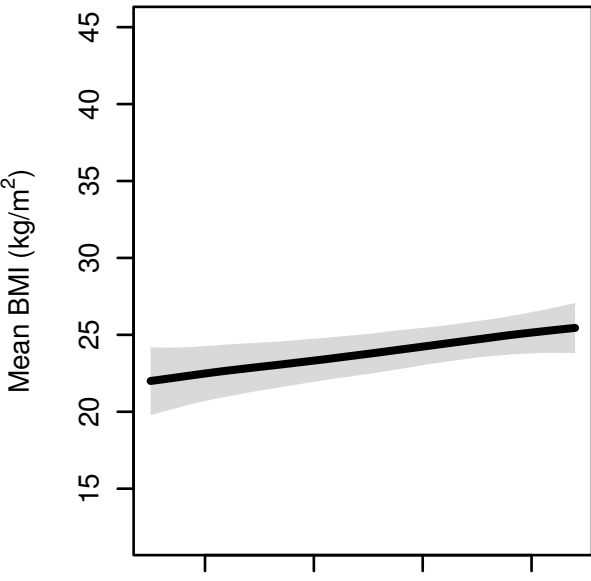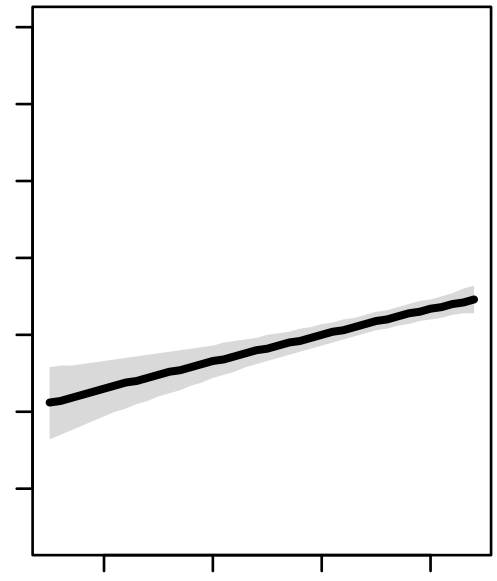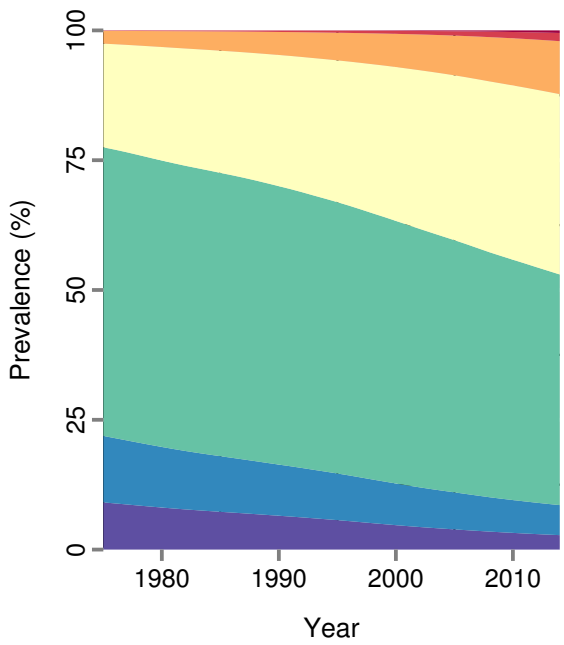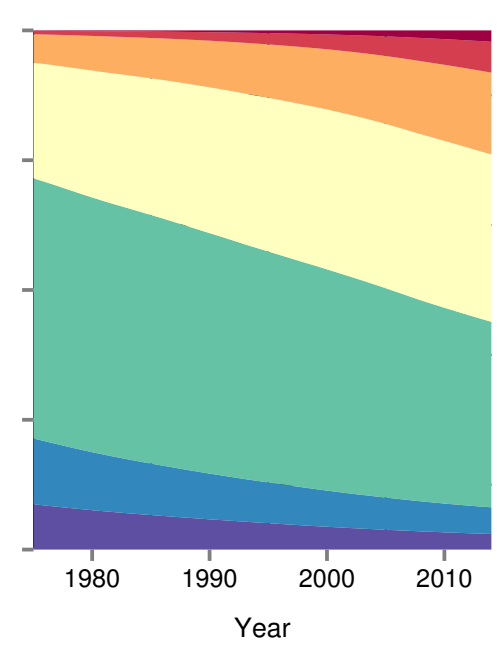

■ BMI <18.5 ■ BMI 18.5-20 ■ BMI 20-25 ■ BMI 25-30 ■ BMI 30-35 ■ BMI 35-40 ■ BMI ≥ 40

Hungary  
Central Europe

Men

Women

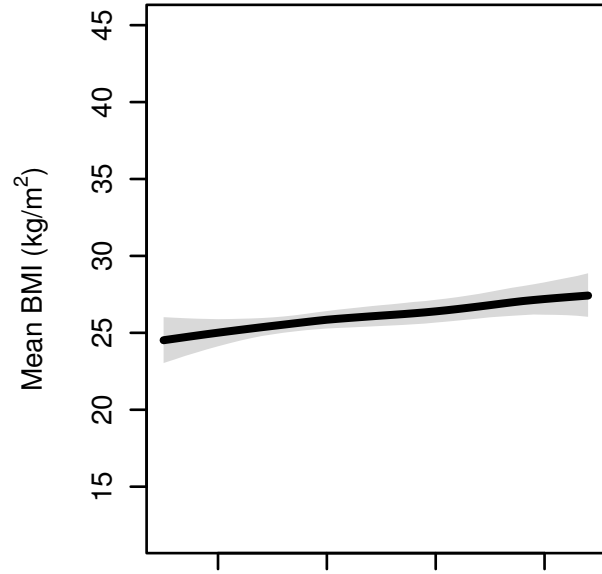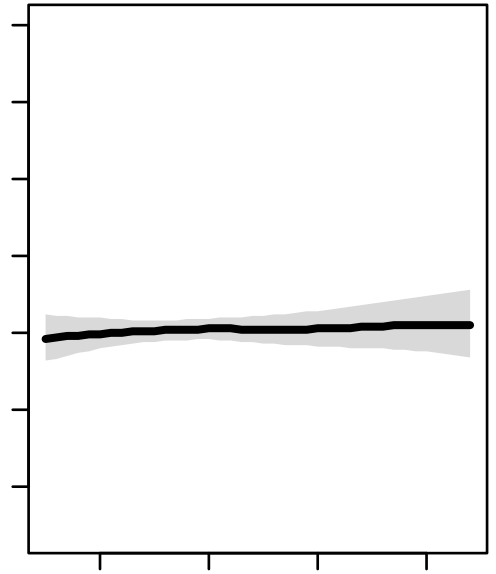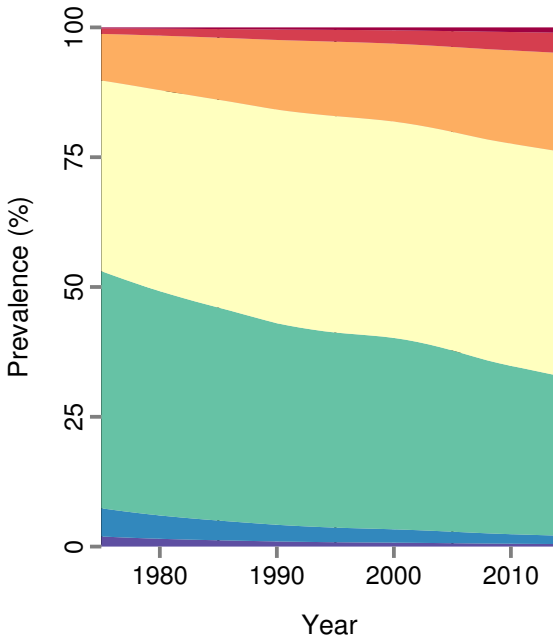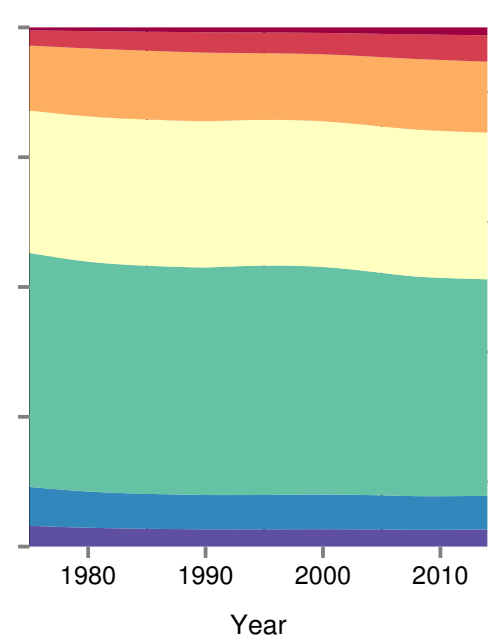

■ BMI <18.5 ■ BMI 18.5-20 ■ BMI 20-25 ■ BMI 25-30 ■ BMI 30-35 ■ BMI 35-40 ■ BMI ≥ 40

Iceland  
North Western Europe

Men

Women

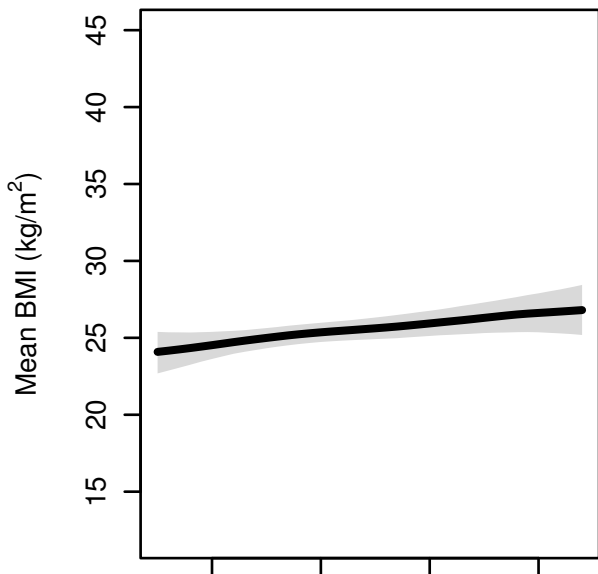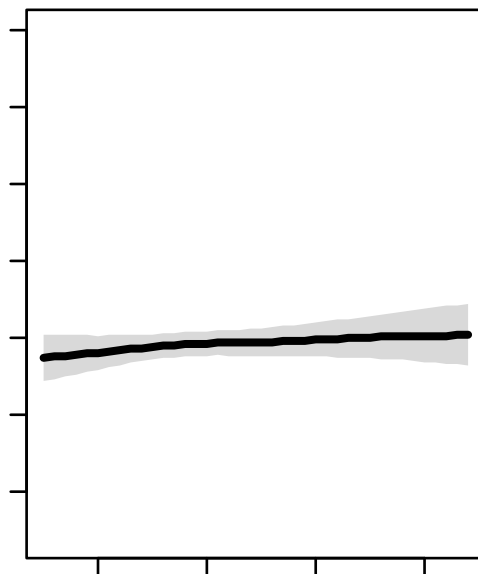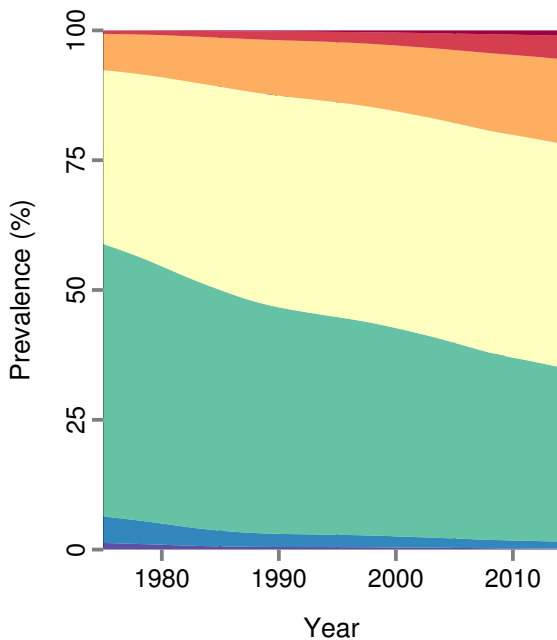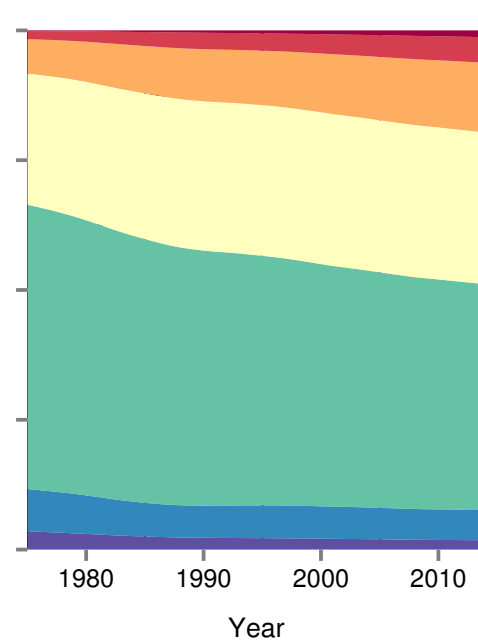

■ BMI <18.5 ■ BMI 18.5-20 ■ BMI 20-25 ■ BMI 25-30 ■ BMI 30-35 ■ BMI 35-40 ■ BMI ≥ 40

India  
South Asia

Men

Women

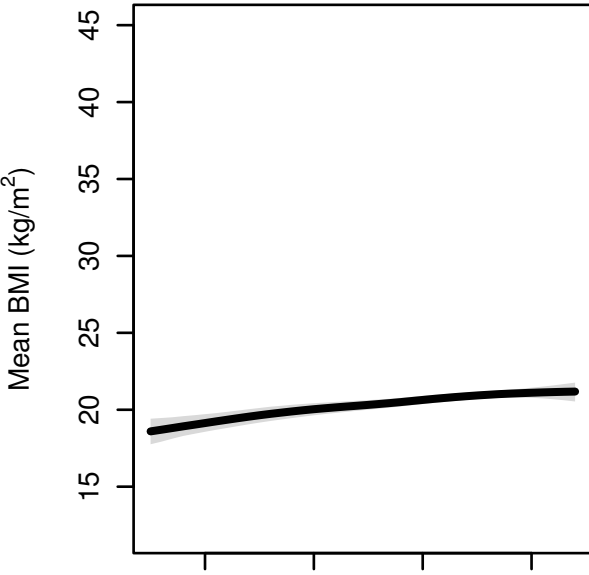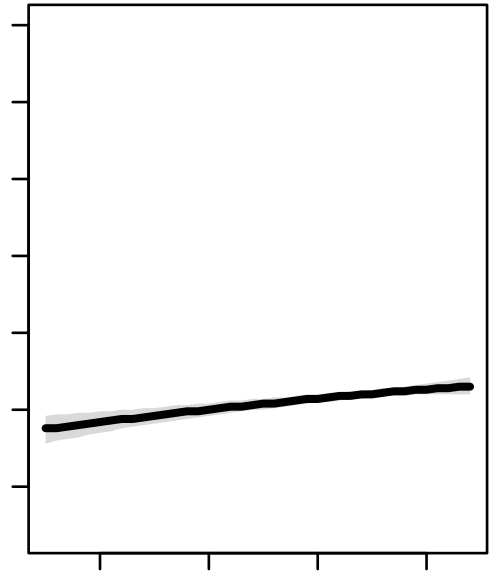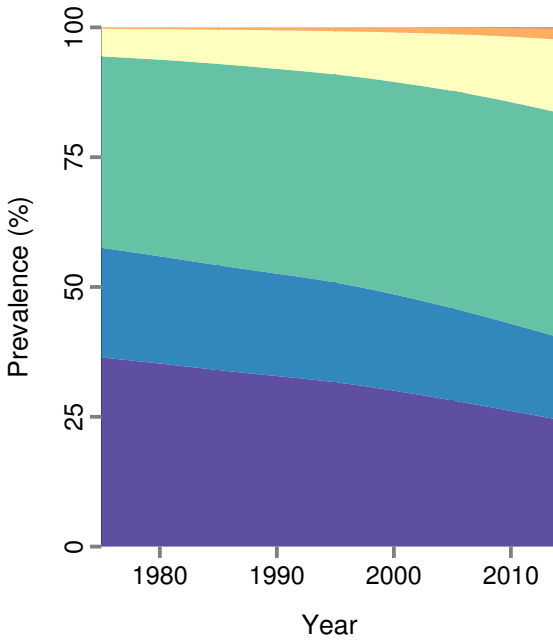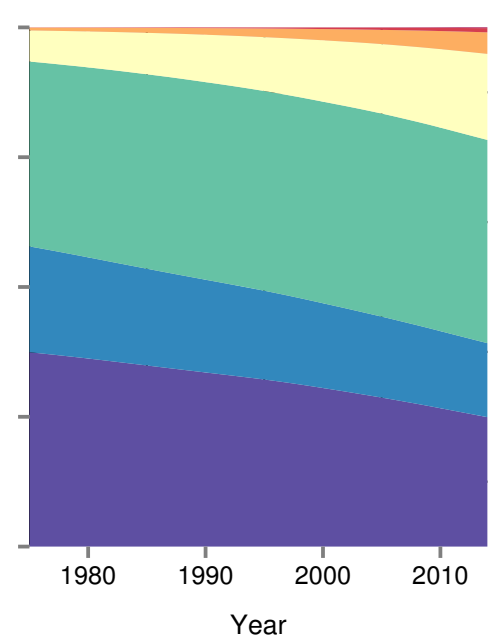

■ BMI <18.5 ■ BMI 18.5-20 ■ BMI 20-25 ■ BMI 25-30 ■ BMI 30-35 ■ BMI 35-40 ■ BMI ≥ 40

Indonesia  
South East Asia

Men

Women

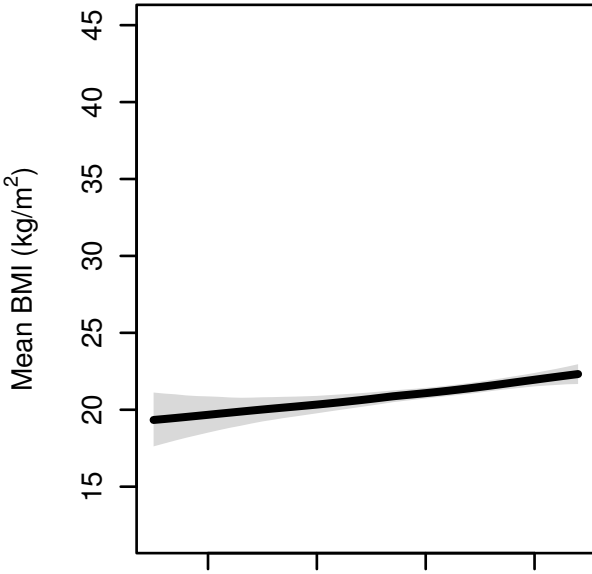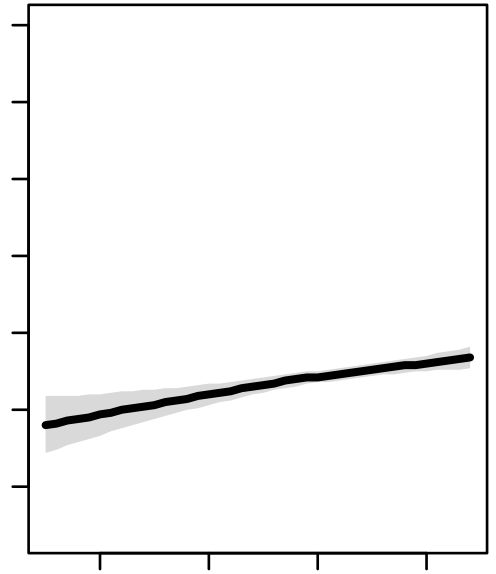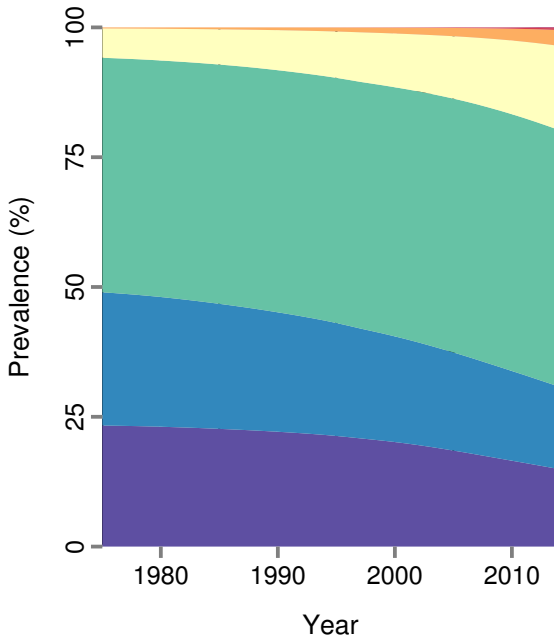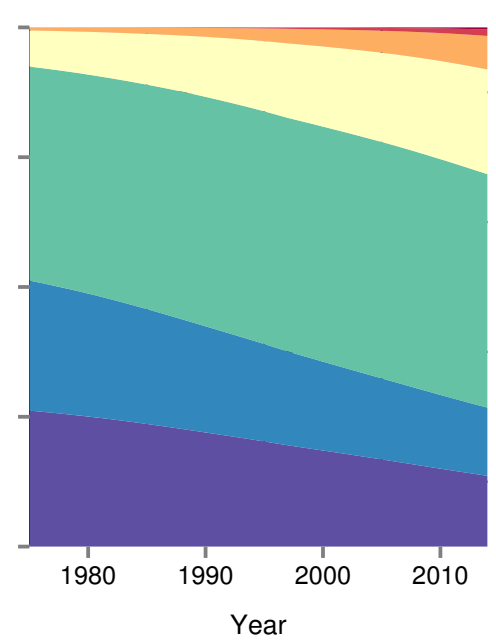

■ BMI <18.5 ■ BMI 18.5-20 ■ BMI 20-25 ■ BMI 25-30 ■ BMI 30-35 ■ BMI 35-40 ■ BMI ≥ 40



Iran  
Middle East and North Africa

Men

Women

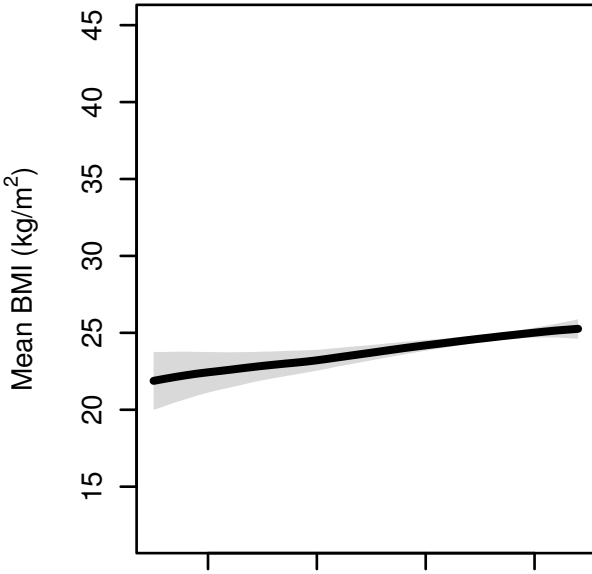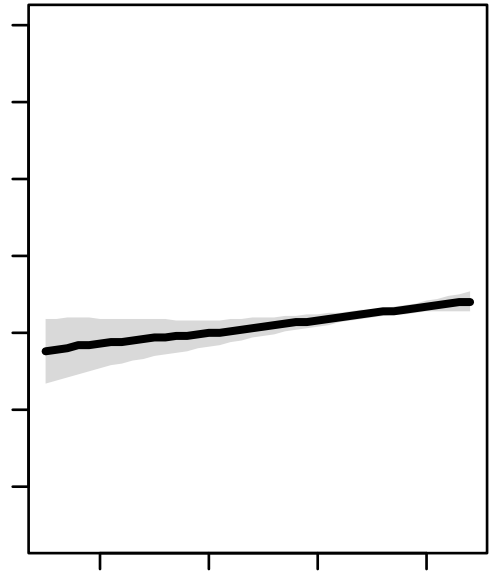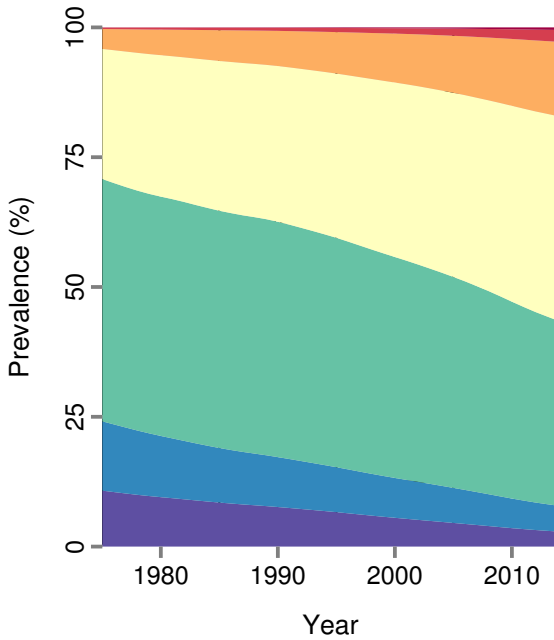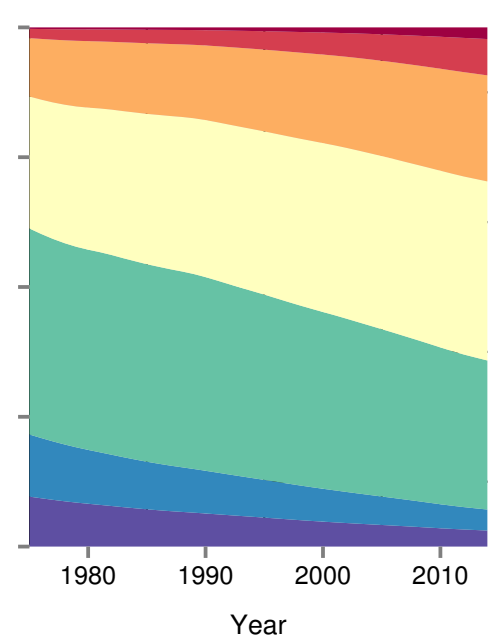

■ BMI <18.5 ■ BMI 18.5-20 ■ BMI 20-25 ■ BMI 25-30 ■ BMI 30-35 ■ BMI 35-40 ■ BMI ≥ 40

# Iraq

## Middle East and North Africa

### Men

### Women

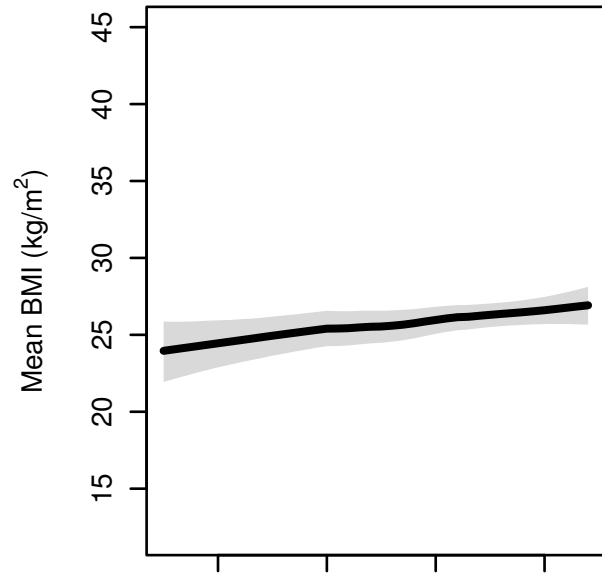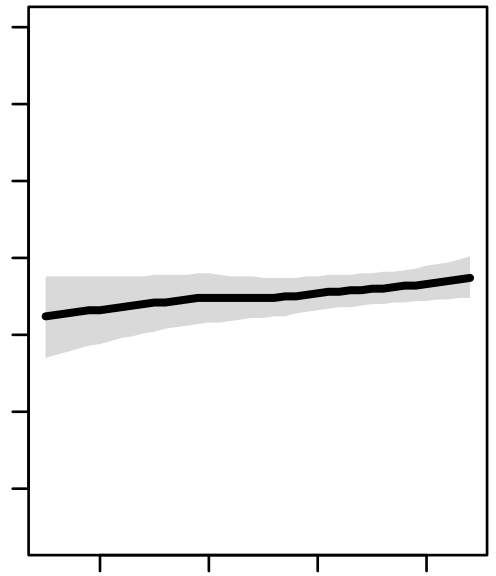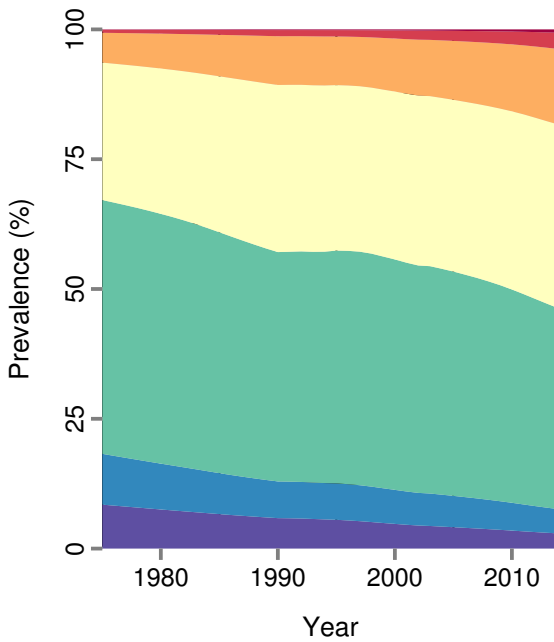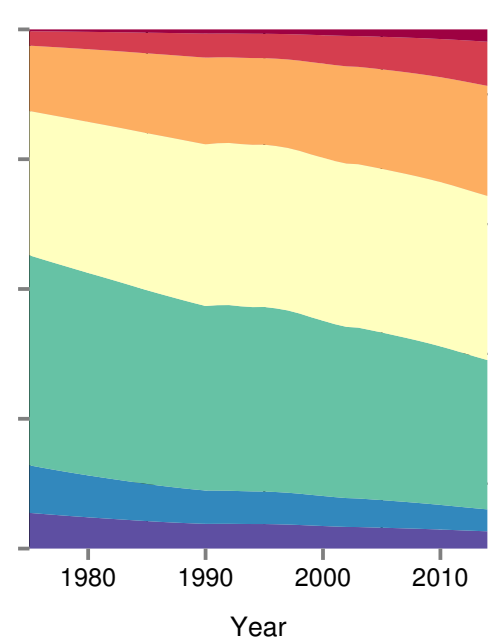

■ BMI <18.5 ■ BMI 18.5-20 ■ BMI 20-25 ■ BMI 25-30 ■ BMI 30-35 ■ BMI 35-40 ■ BMI ≥ 40

# Ireland

High-income English-speaking countries

## Men

## Women

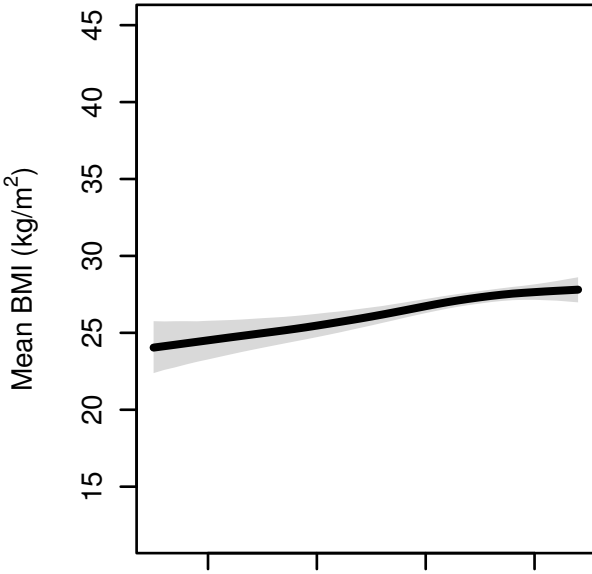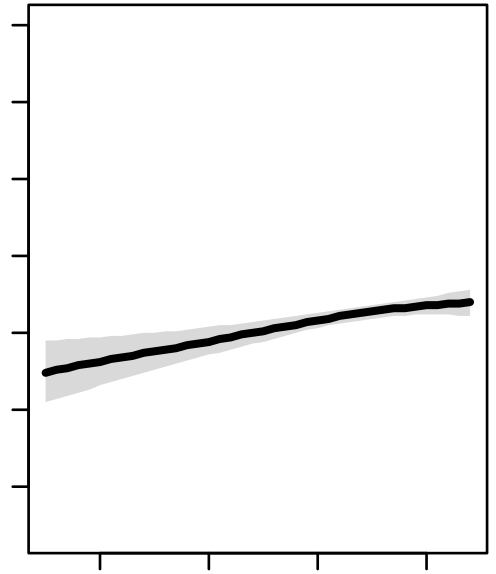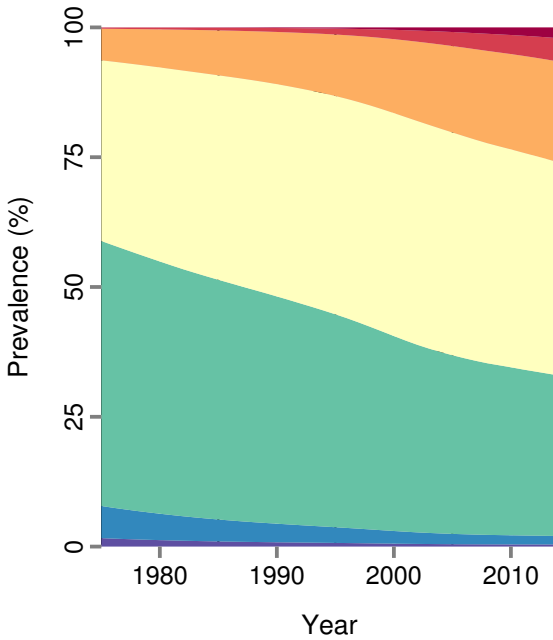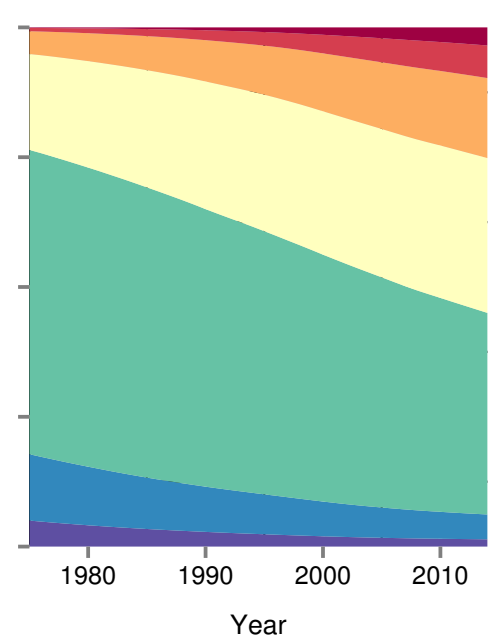

■ BMI <18.5 ■ BMI 18.5-20 ■ BMI 20-25 ■ BMI 25-30 ■ BMI 30-35 ■ BMI 35-40 ■ BMI ≥ 40

Israel  
South Western Europe

Men

Women

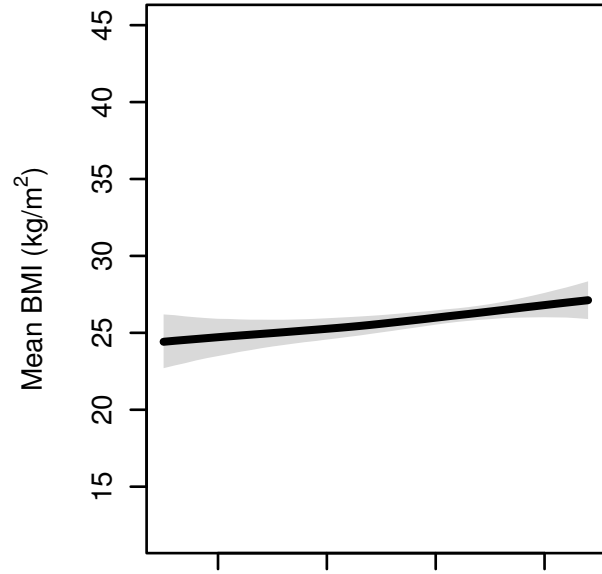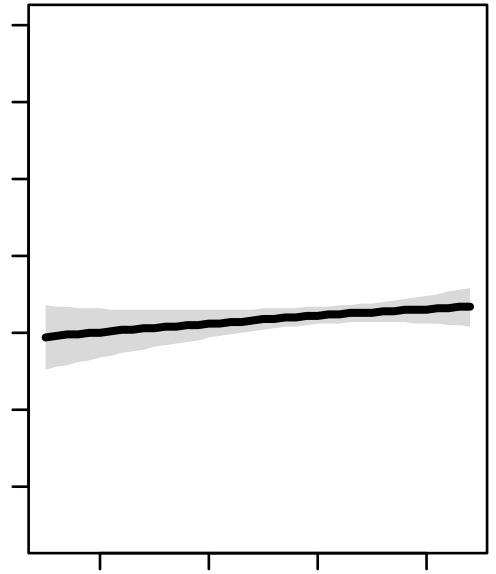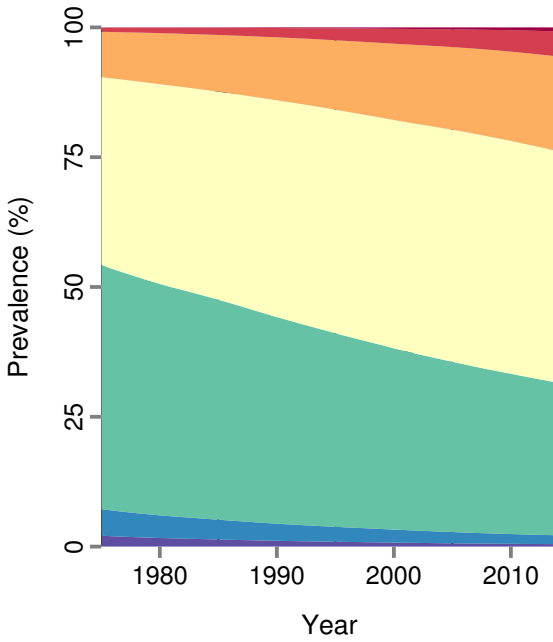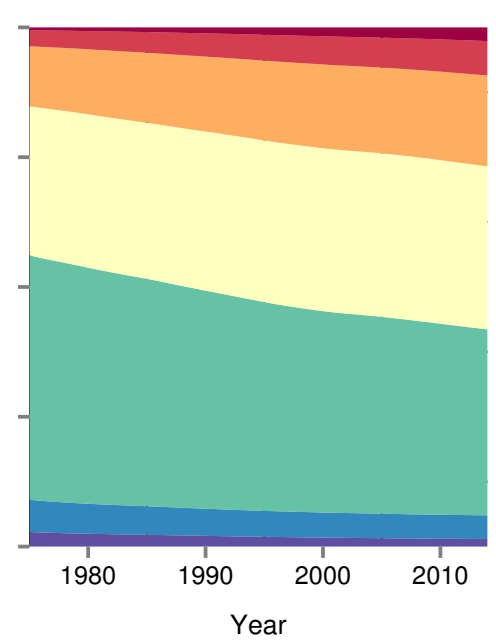

■ BMI <18.5 ■ BMI 18.5-20 ■ BMI 20-25 ■ BMI 25-30 ■ BMI 30-35 ■ BMI 35-40 ■ BMI ≥ 40

Italy  
South Western Europe

Men

Women

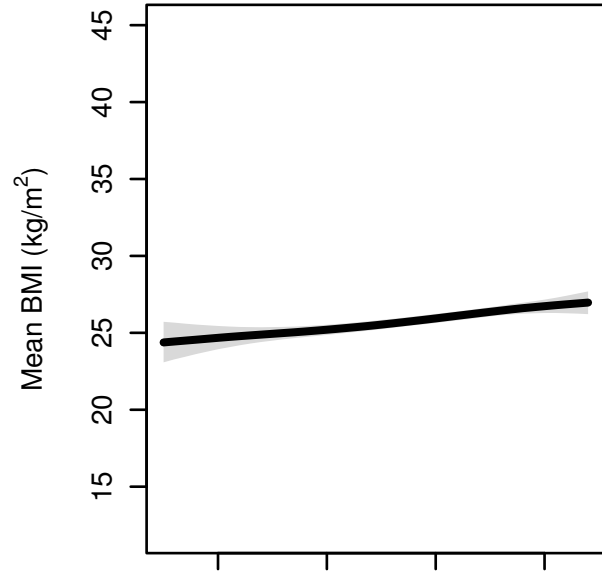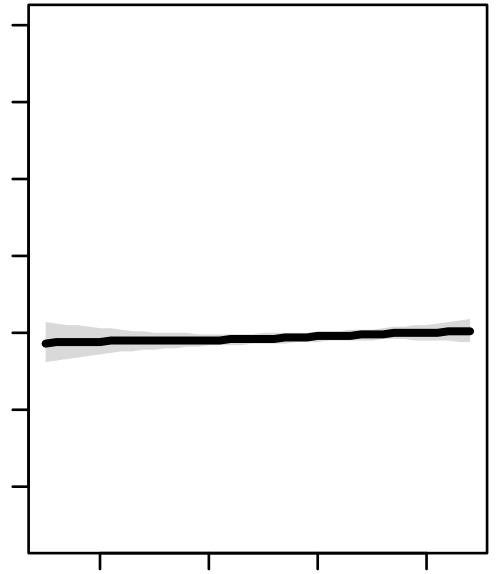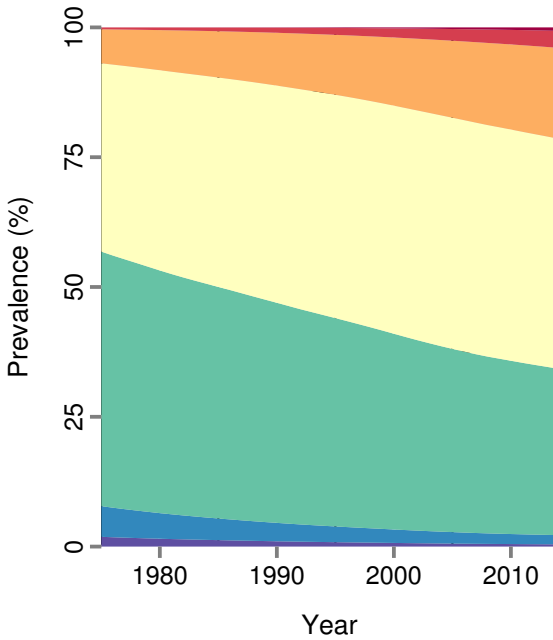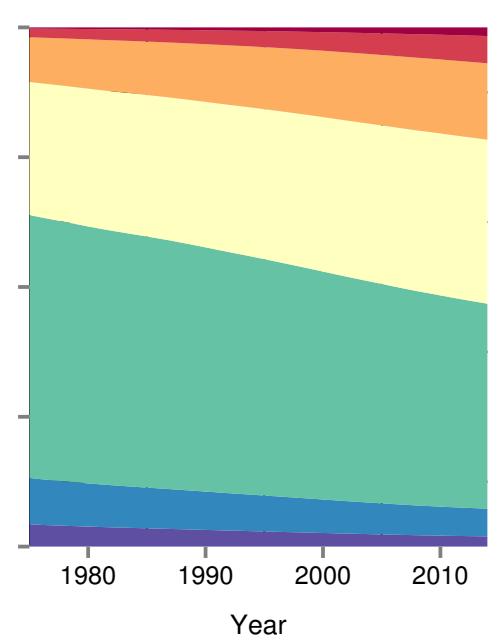

■ BMI <18.5 ■ BMI 18.5-20 ■ BMI 20-25 ■ BMI 25-30 ■ BMI 30-35 ■ BMI 35-40 ■ BMI ≥ 40

Jamaica  
Caribbean

Men

Women

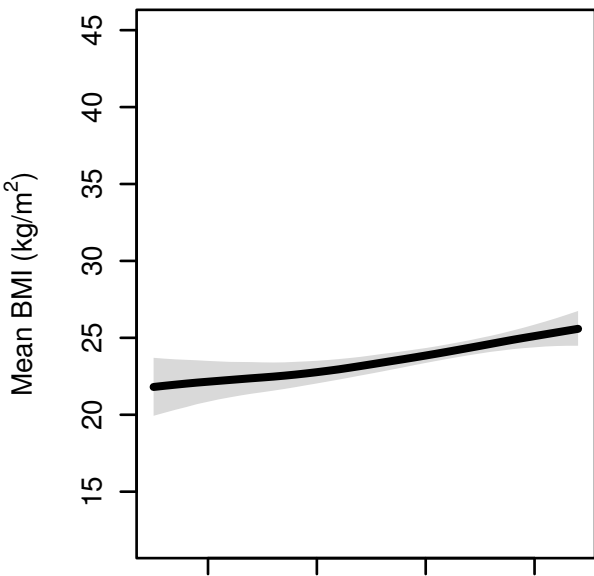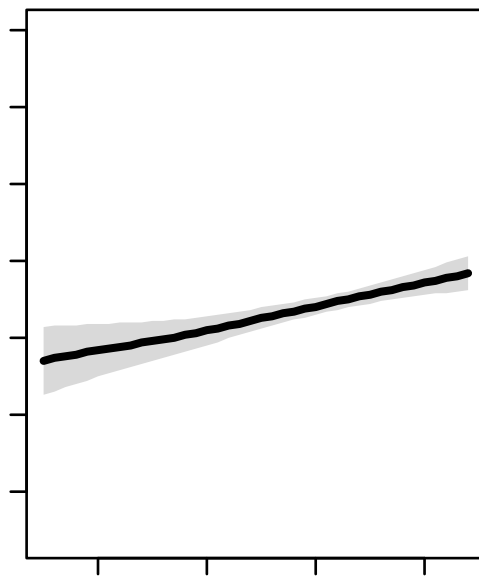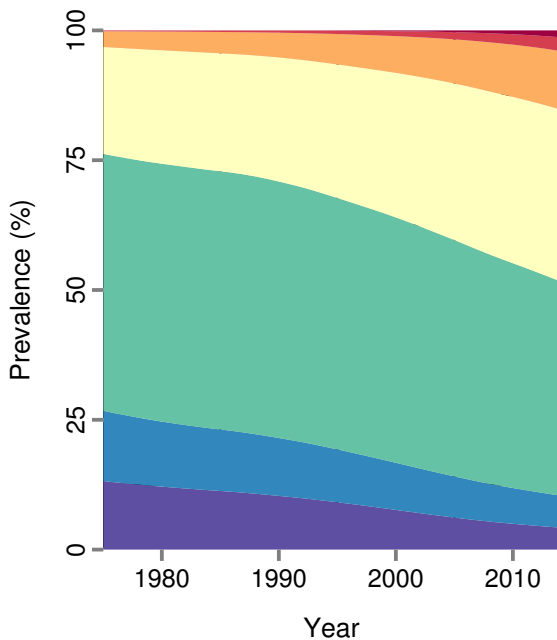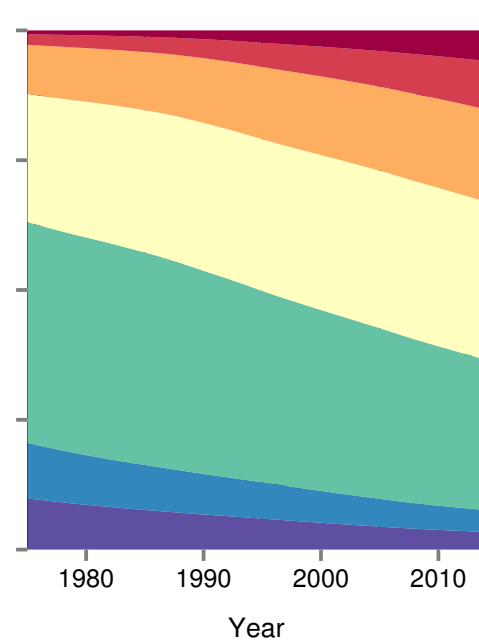

■ BMI <18.5 ■ BMI 18.5-20 ■ BMI 20-25 ■ BMI 25-30 ■ BMI 30-35 ■ BMI 35-40 ■ BMI ≥ 40

Japan  
High-income Asia Pacific

Men

Women

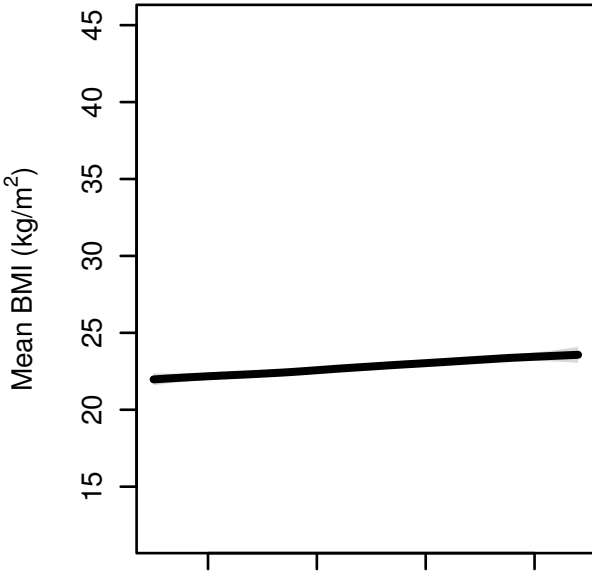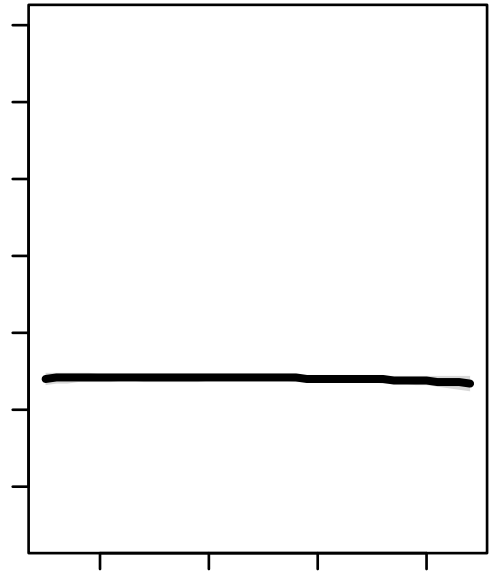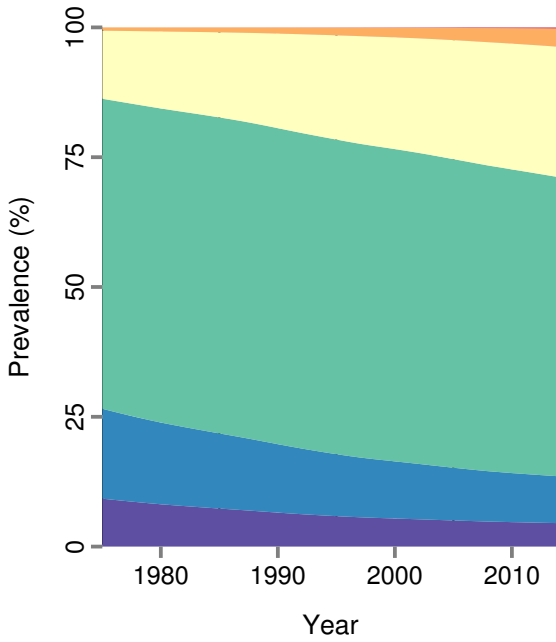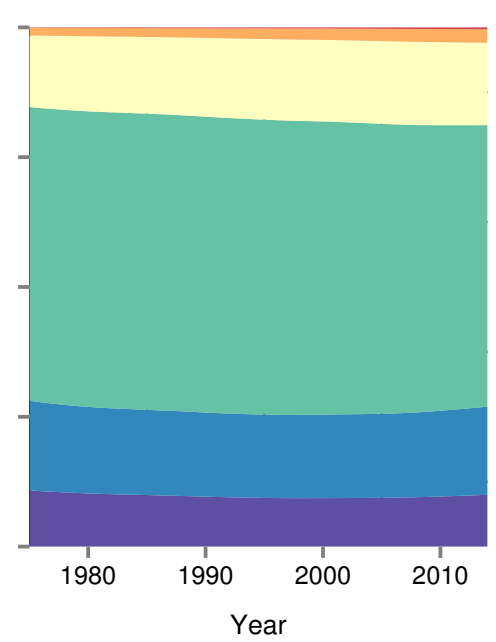

BMI <18.5 BMI 18.5-20 BMI 20-25 BMI 25-30 BMI 30-35 BMI 35-40 BMI ≥ 40

Jordan  
Middle East and North Africa

Men

Women

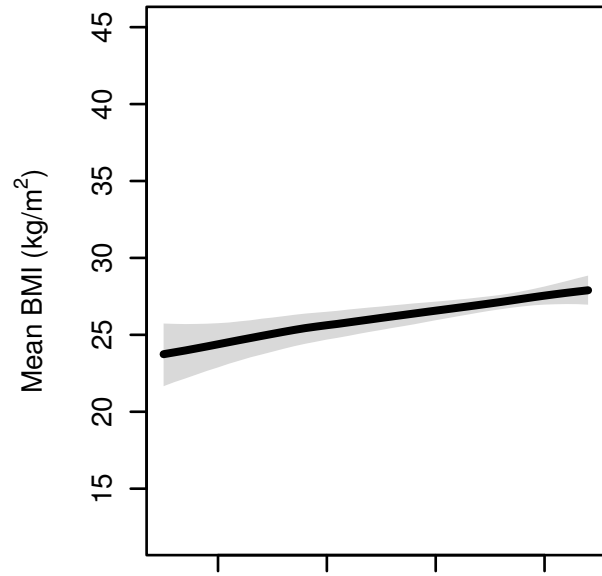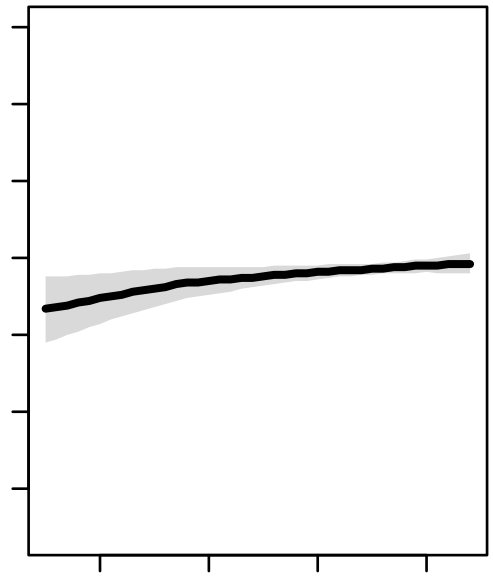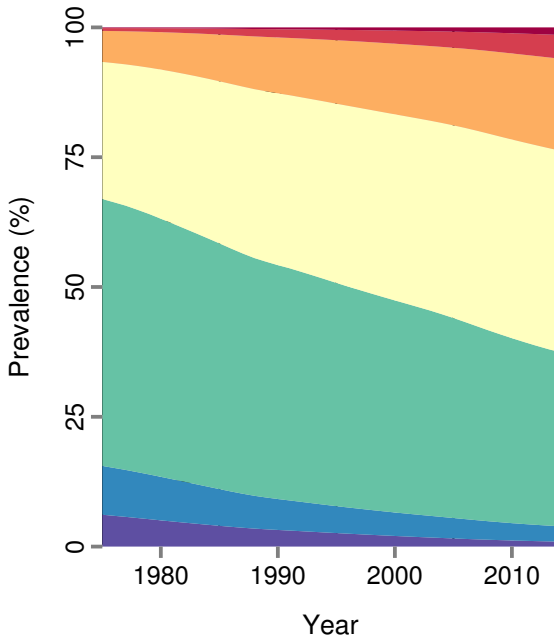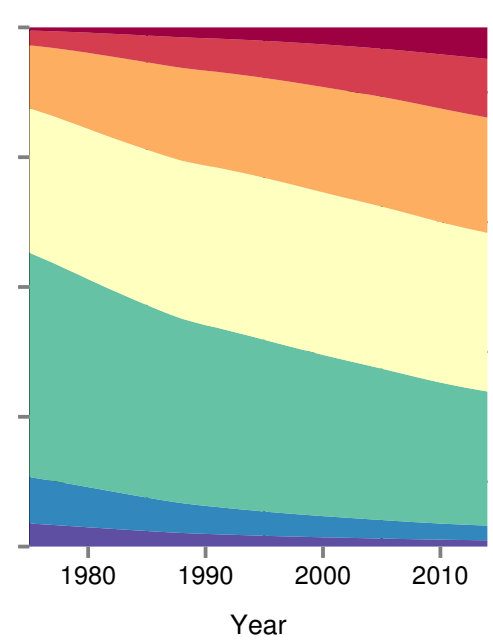

■ BMI <18.5 ■ BMI 18.5-20 ■ BMI 20-25 ■ BMI 25-30 ■ BMI 30-35 ■ BMI 35-40 ■ BMI ≥ 40



Kazakhstan  
Central Asia

Men

Women

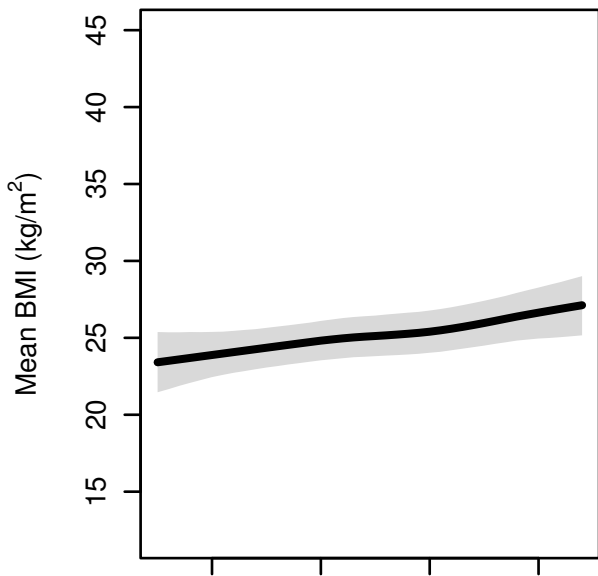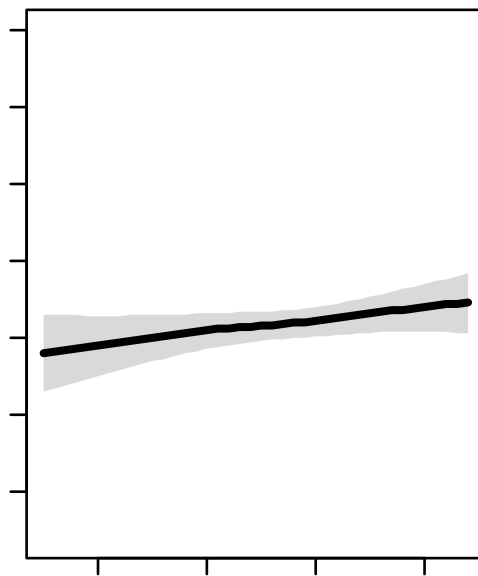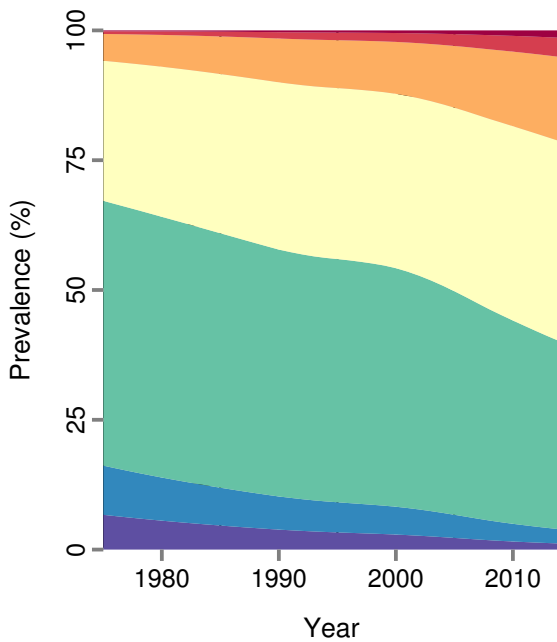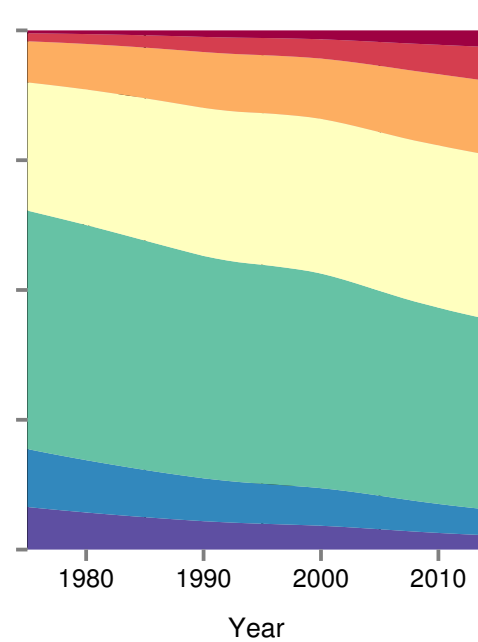

■ BMI <18.5 ■ BMI 18.5-20 ■ BMI 20-25 ■ BMI 25-30 ■ BMI 30-35 ■ BMI 35-40 ■ BMI ≥ 40

Kenya  
East Africa

Men

Women

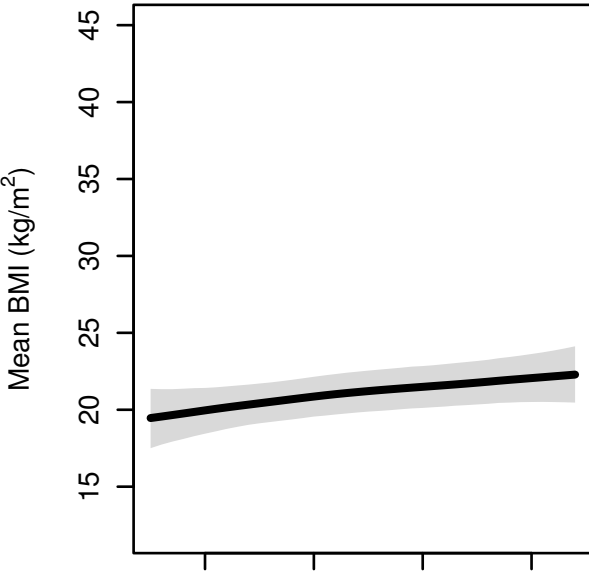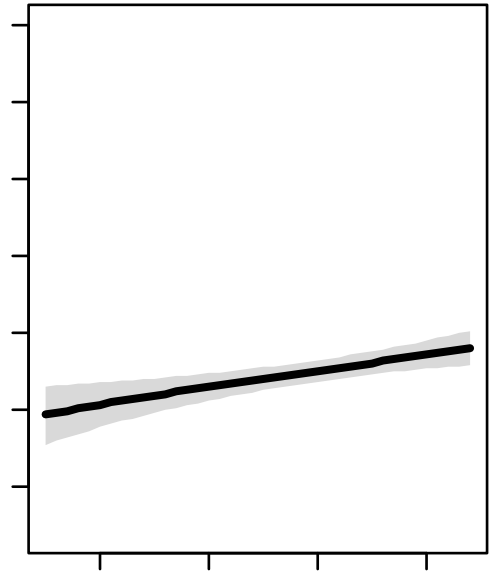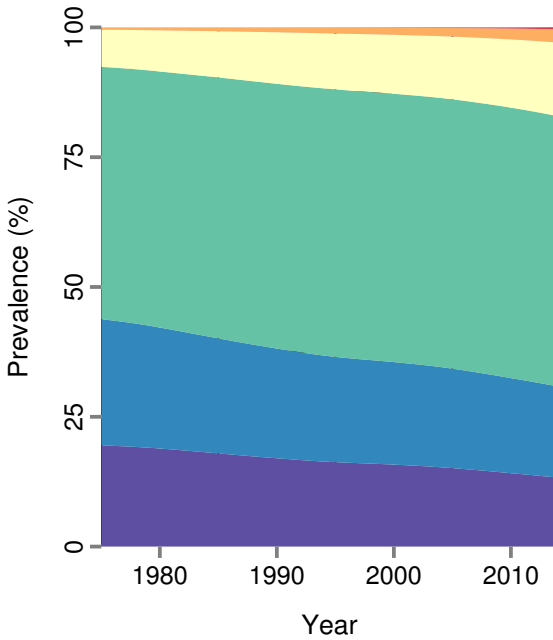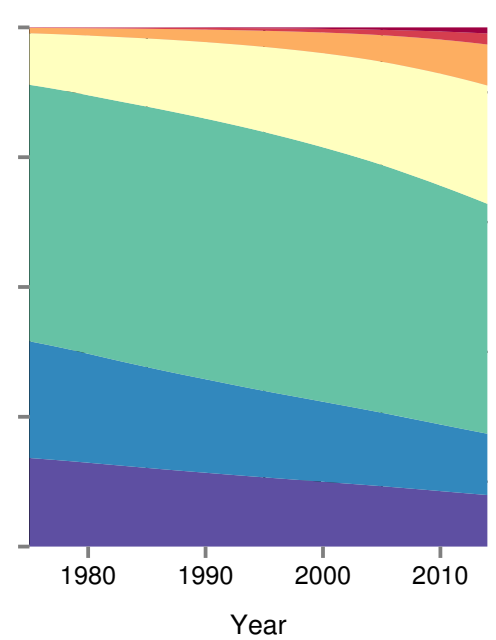

■ BMI <18.5 ■ BMI 18.5-20 ■ BMI 20-25 ■ BMI 25-30 ■ BMI 30-35 ■ BMI 35-40 ■ BMI ≥ 40

# Kiribati

Polynesia and Micronesia

## Men

## Women

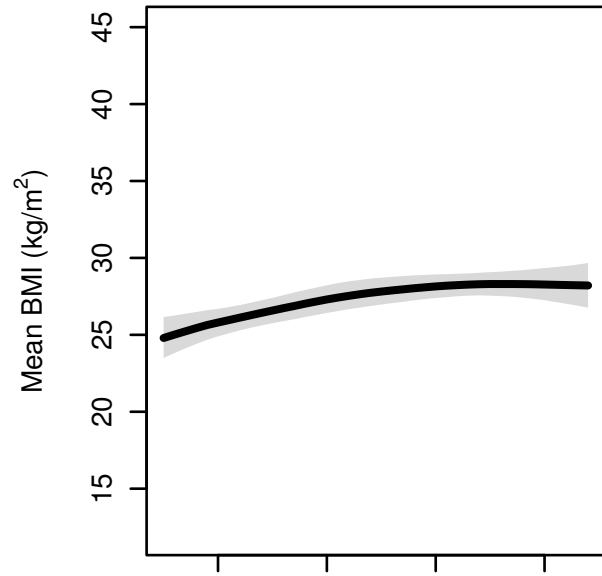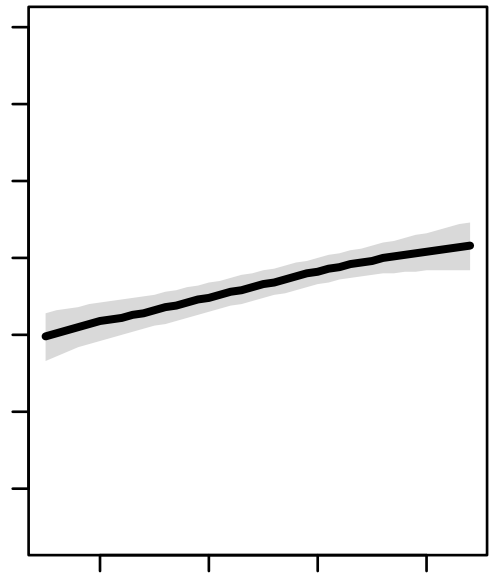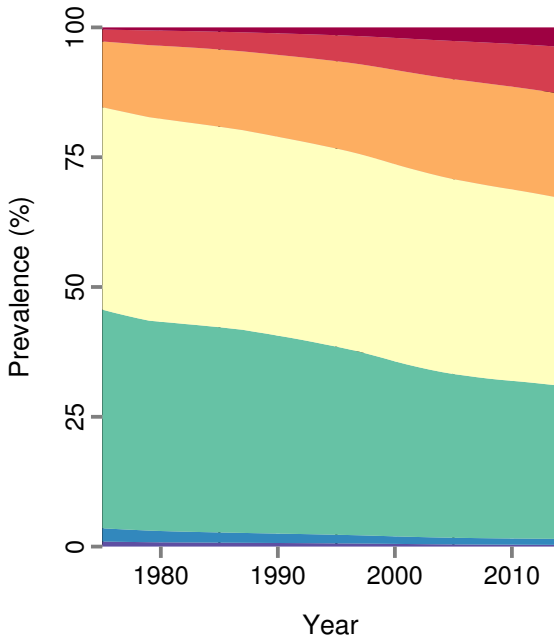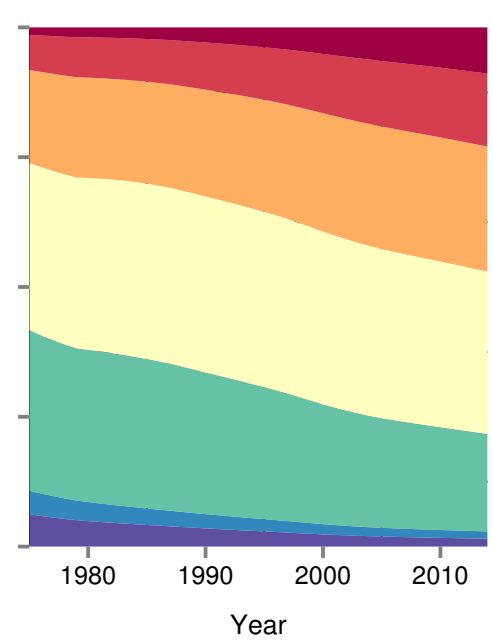

■ BMI <18.5 ■ BMI 18.5-20 ■ BMI 20-25 ■ BMI 25-30 ■ BMI 30-35 ■ BMI 35-40 ■ BMI ≥ 40

# Kuwait

Middle East and North Africa

## Men

## Women

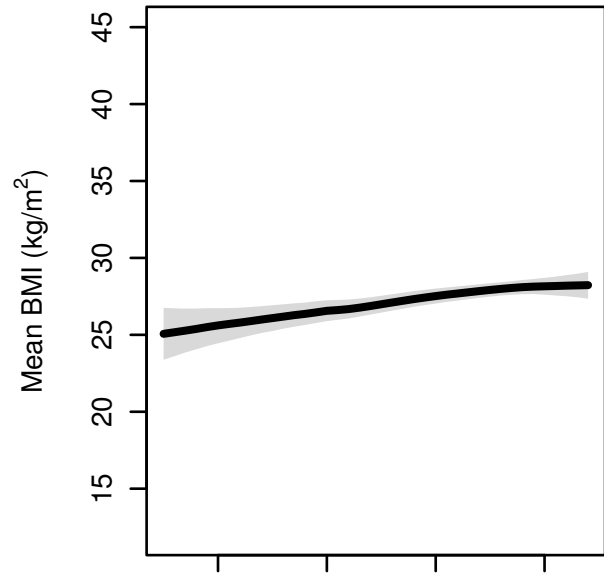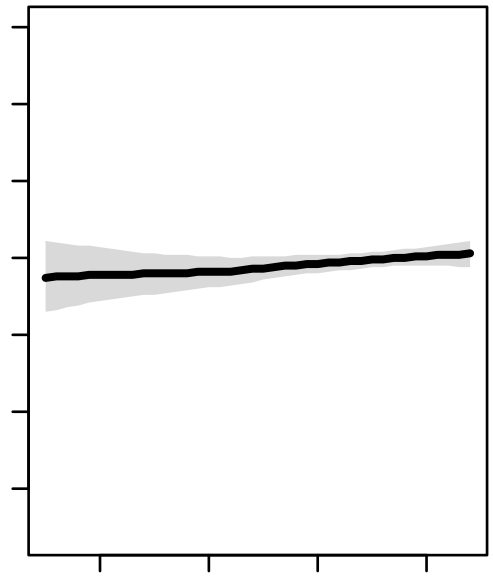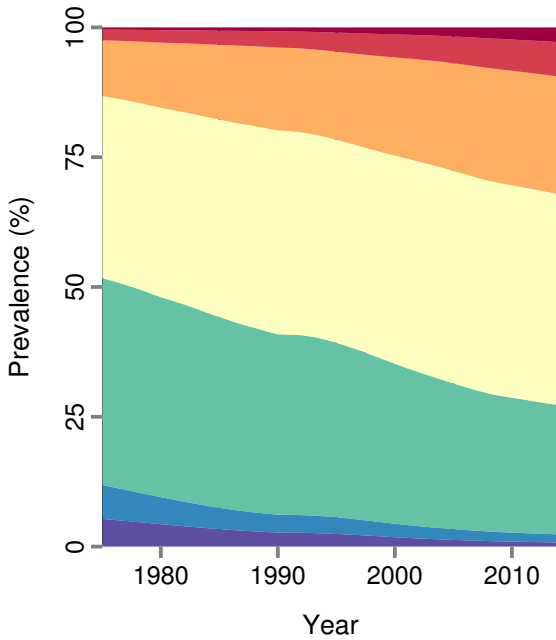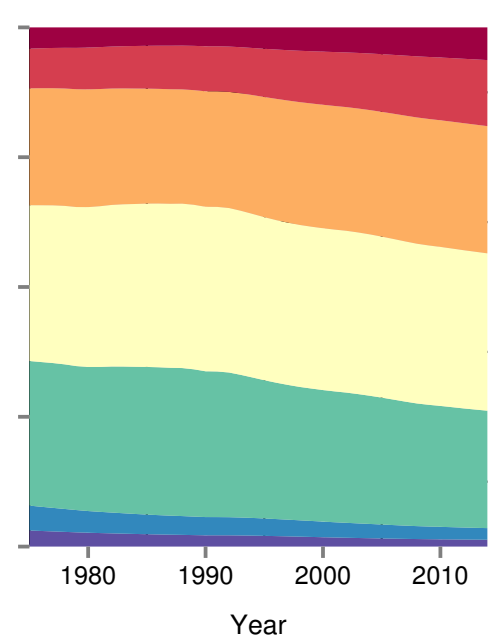

■ BMI <18.5 ■ BMI 18.5-20 ■ BMI 20-25 ■ BMI 25-30 ■ BMI 30-35 ■ BMI 35-40 ■ BMI ≥ 40

Kyrgyzstan  
Central Asia

Men

Women

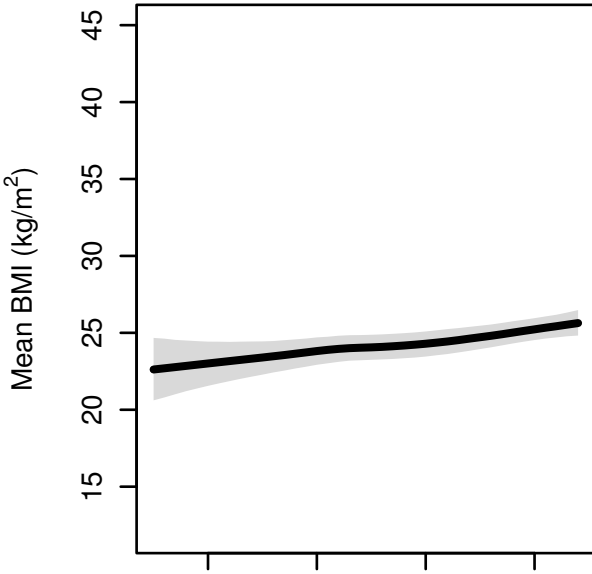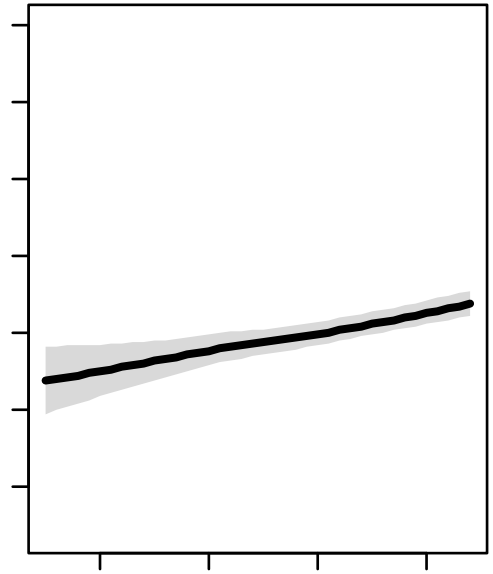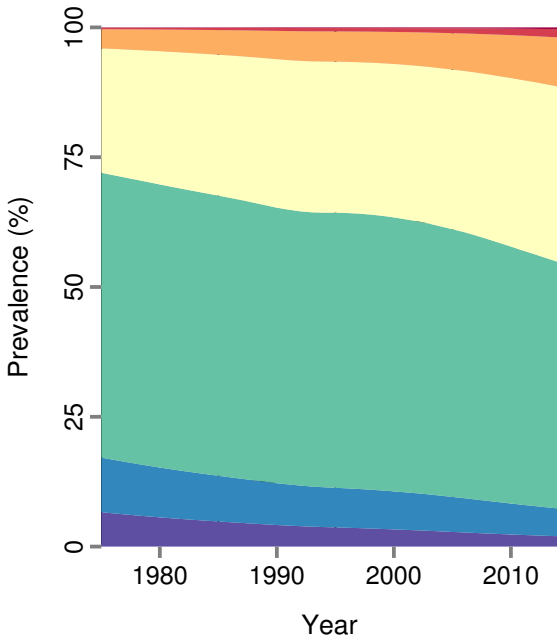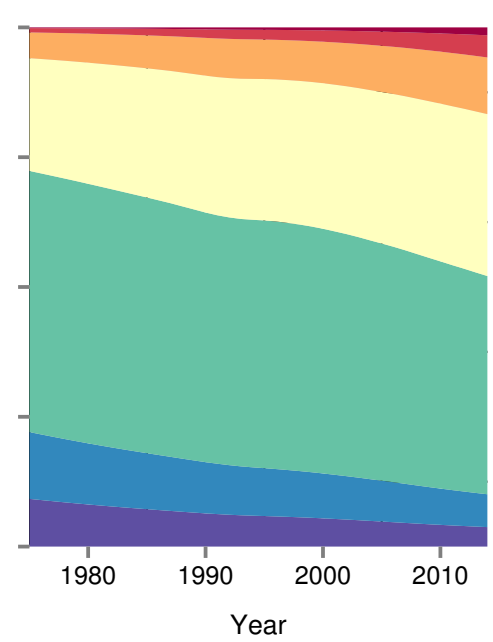

■ BMI <18.5 ■ BMI 18.5-20 ■ BMI 20-25 ■ BMI 25-30 ■ BMI 30-35 ■ BMI 35-40 ■ BMI ≥ 40

Lao PDR  
South East Asia

Men

Women

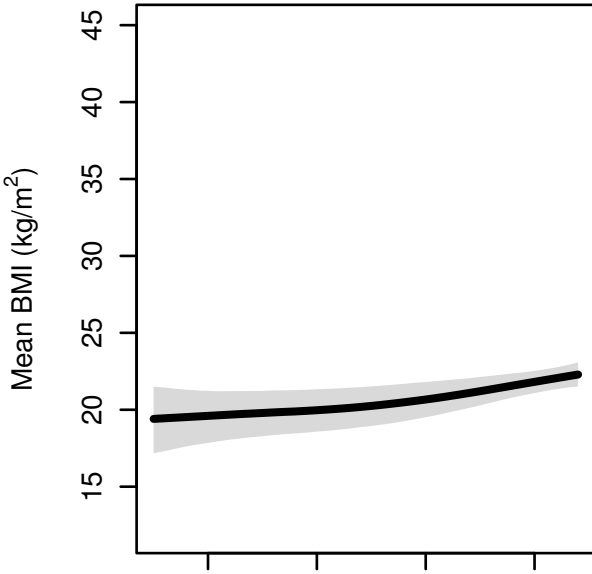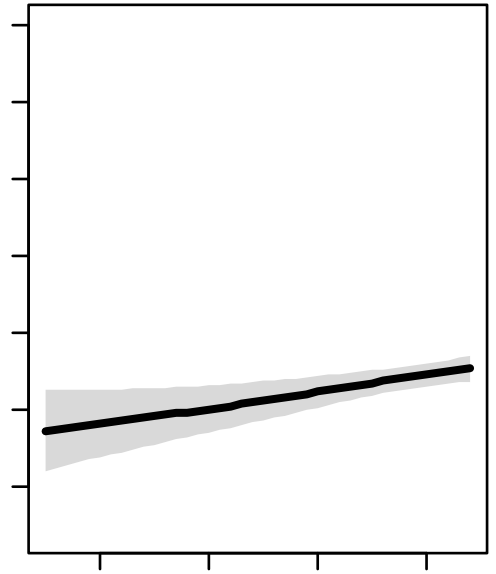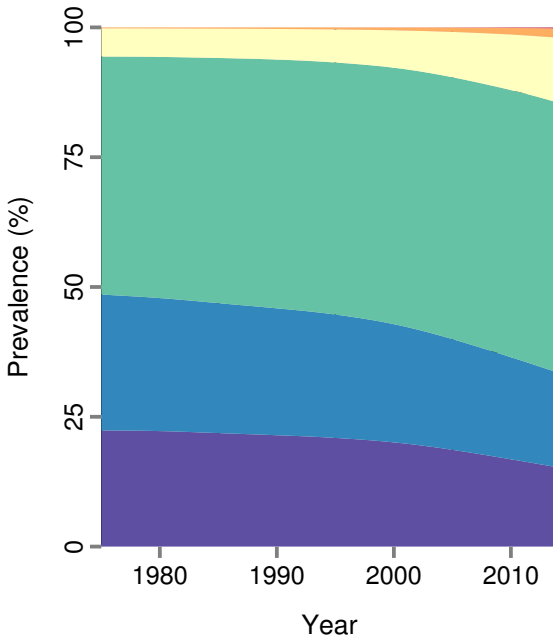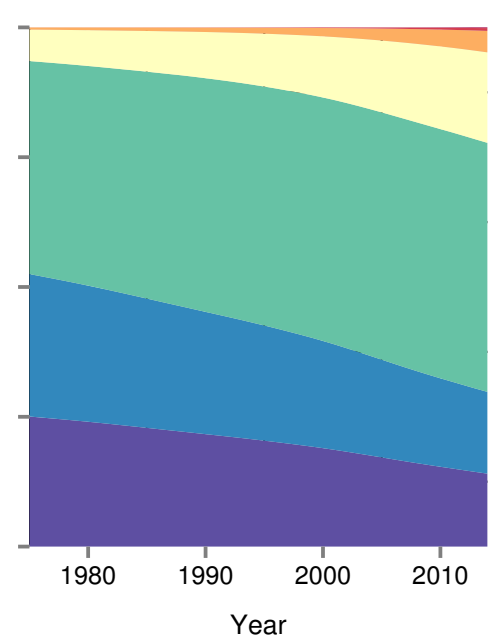

■ BMI <18.5 ■ BMI 18.5-20 ■ BMI 20-25 ■ BMI 25-30 ■ BMI 30-35 ■ BMI 35-40 ■ BMI ≥ 40

Latvia  
Eastern Europe

Men

Women

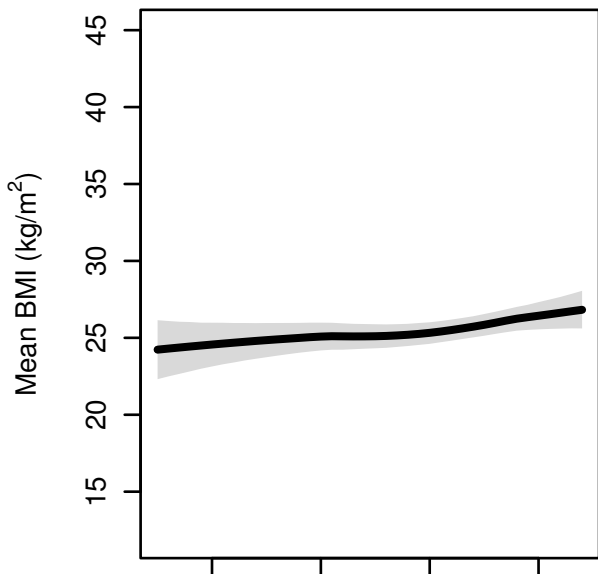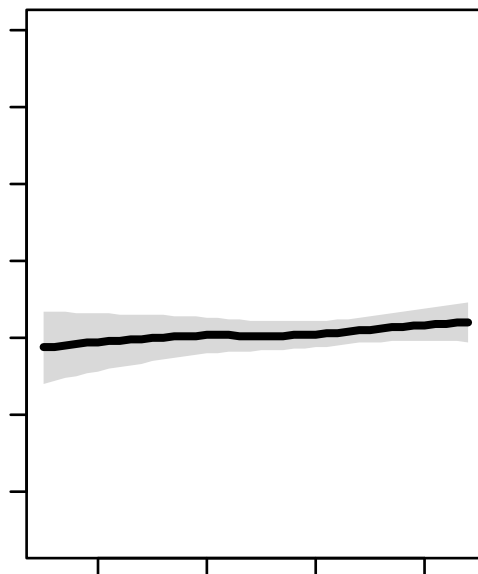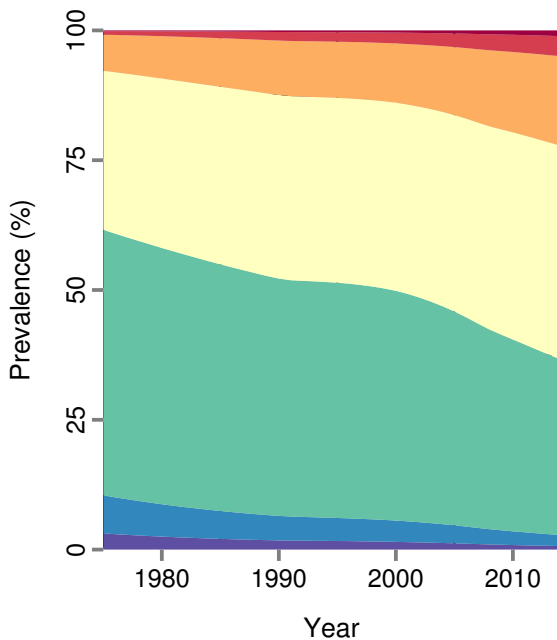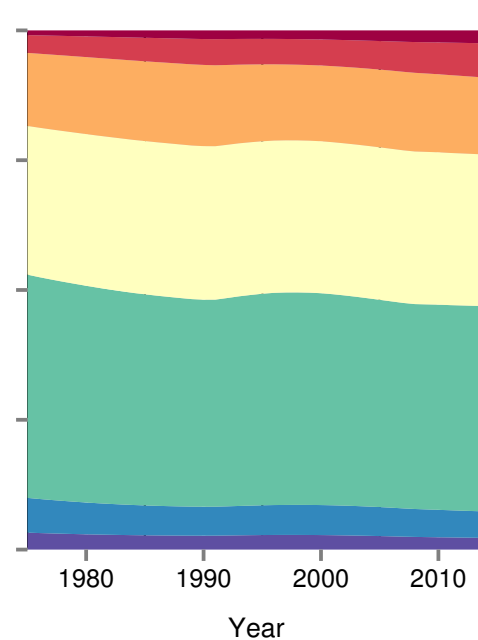

■ BMI <18.5 ■ BMI 18.5-20 ■ BMI 20-25 ■ BMI 25-30 ■ BMI 30-35 ■ BMI 35-40 ■ BMI ≥ 40

# Lebanon

Middle East and North Africa

## Men

## Women

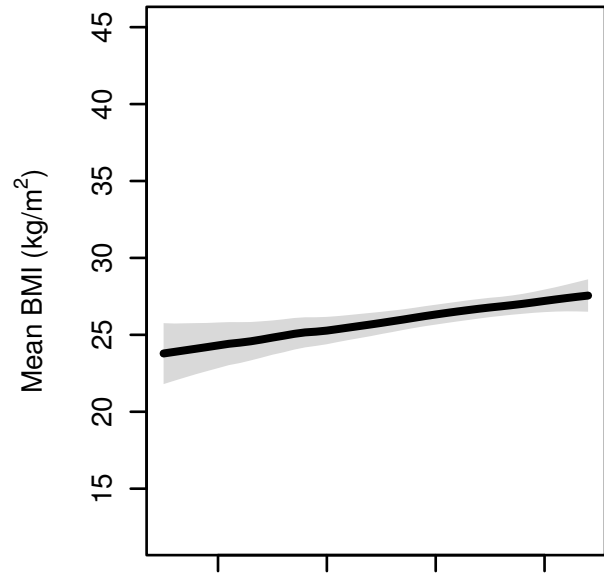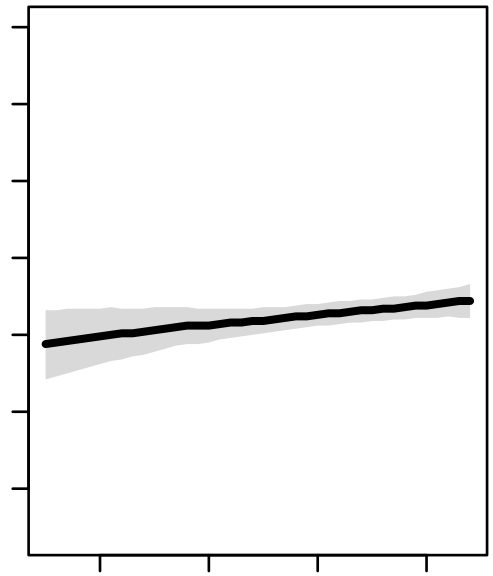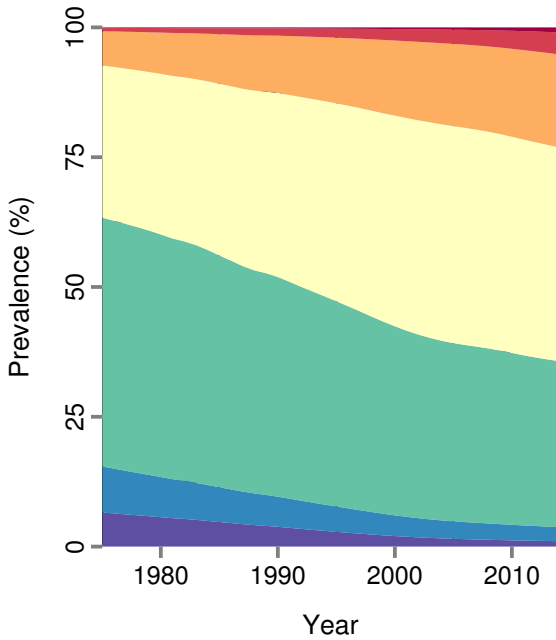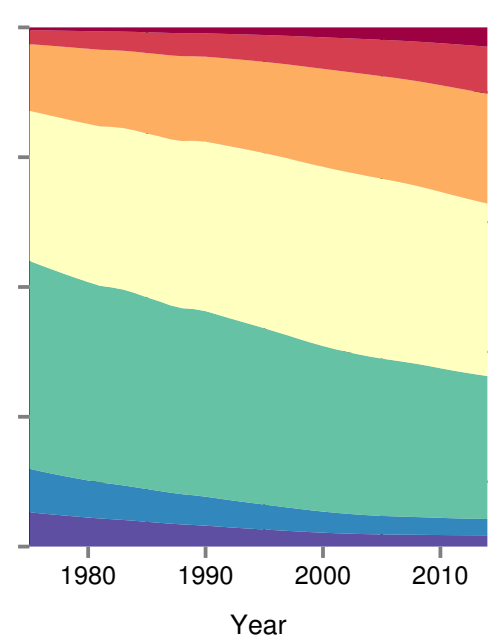

■ BMI <18.5 ■ BMI 18.5-20 ■ BMI 20-25 ■ BMI 25-30 ■ BMI 30-35 ■ BMI 35-40 ■ BMI ≥ 40



Lesotho  
Southern Africa

Men

Women

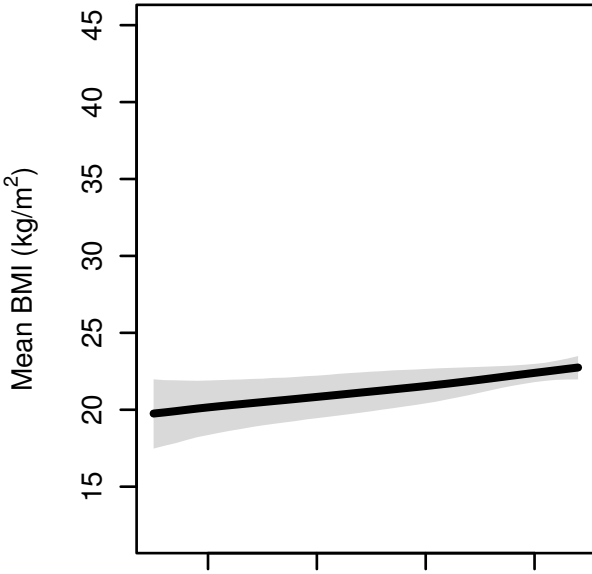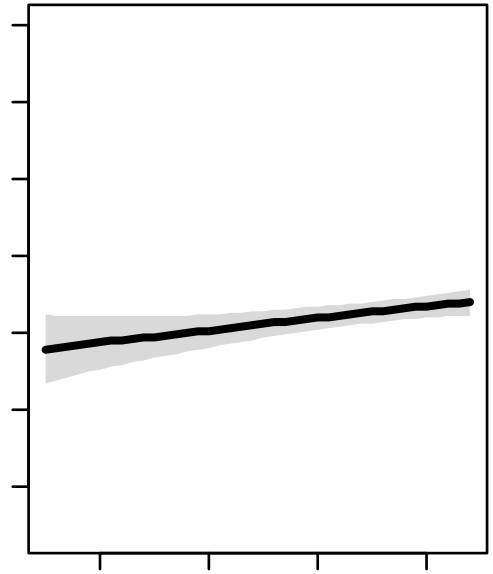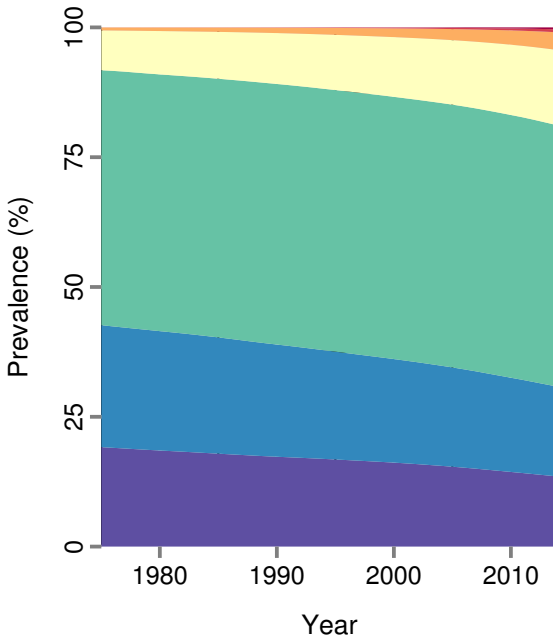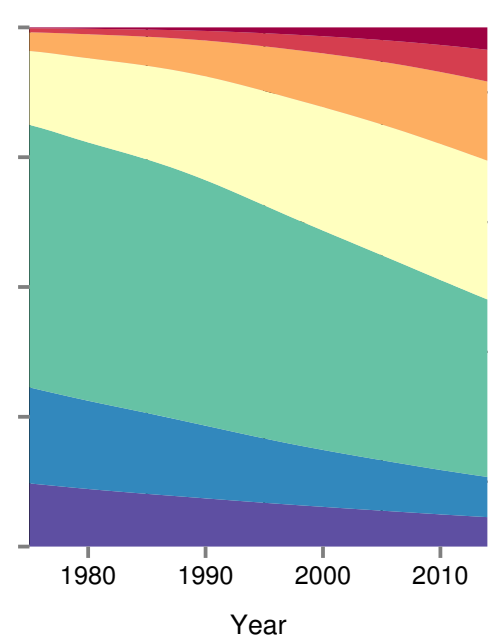

■ BMI <18.5 ■ BMI 18.5-20 ■ BMI 20-25 ■ BMI 25-30 ■ BMI 30-35 ■ BMI 35-40 ■ BMI ≥ 40

Liberia  
West Africa

Men

Women

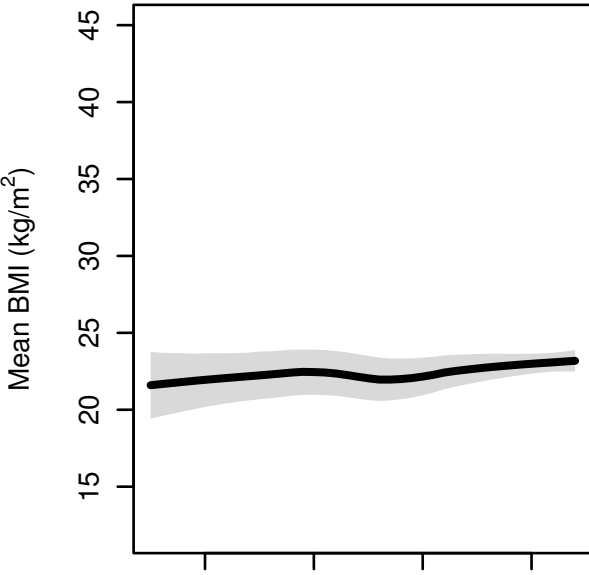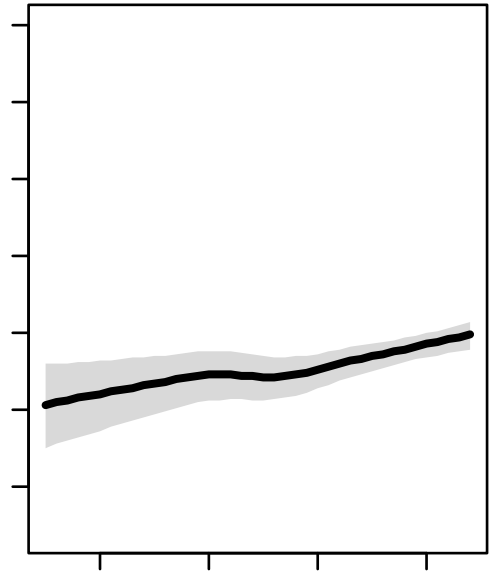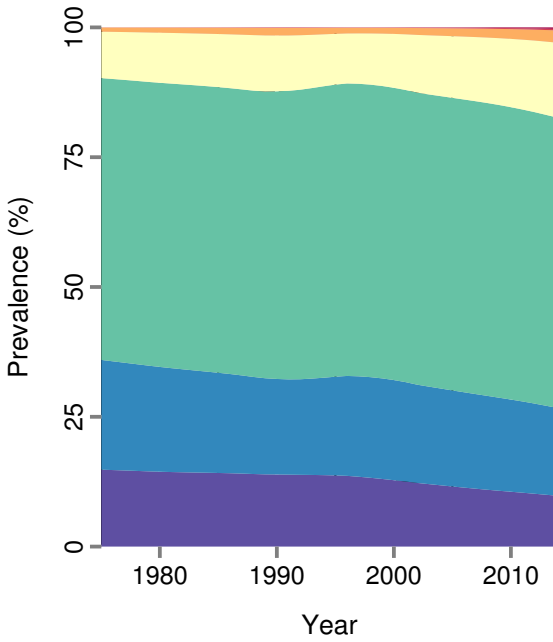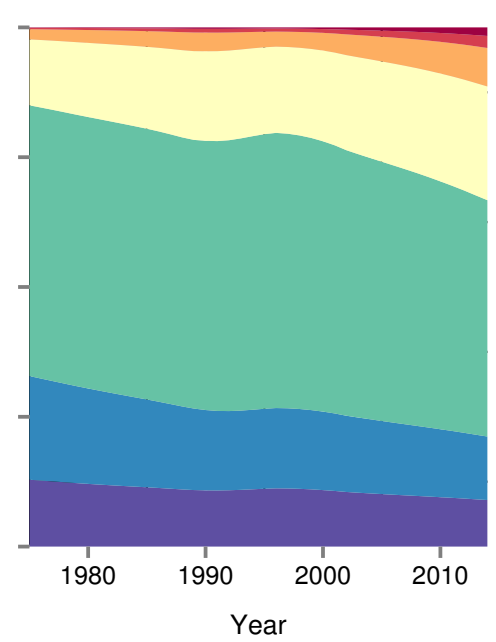

■ BMI <18.5 ■ BMI 18.5-20 ■ BMI 20-25 ■ BMI 25-30 ■ BMI 30-35 ■ BMI 35-40 ■ BMI ≥ 40

# Libya

Middle East and North Africa

## Men

## Women

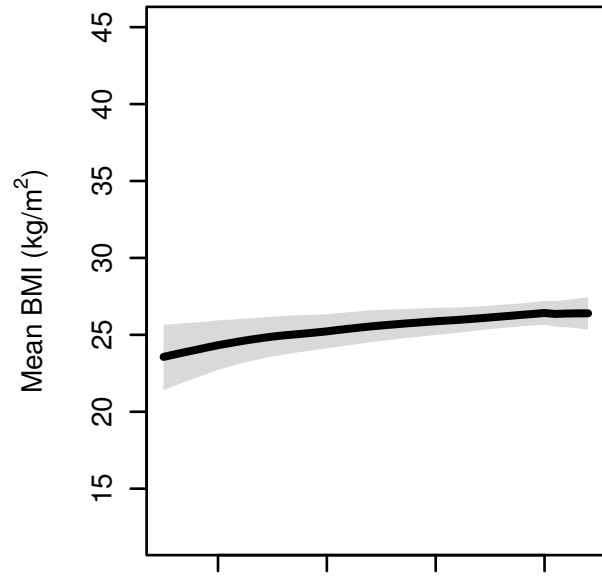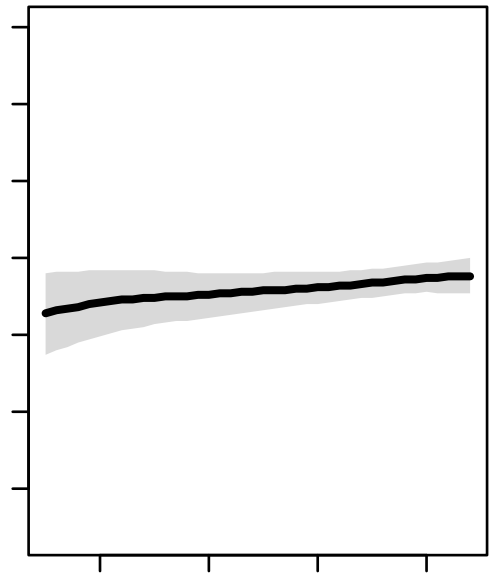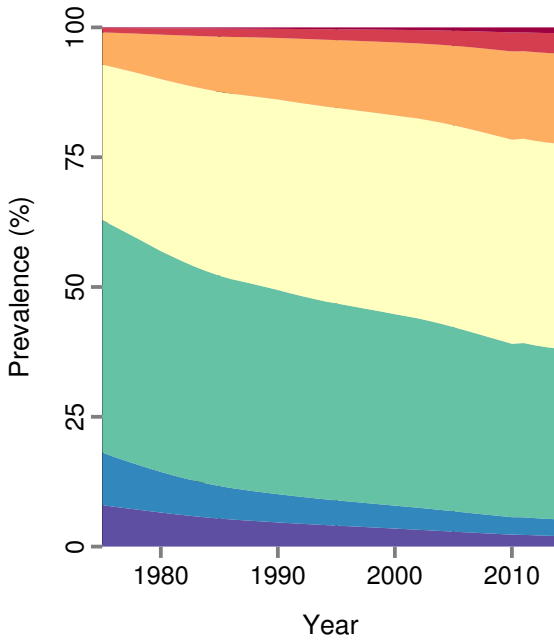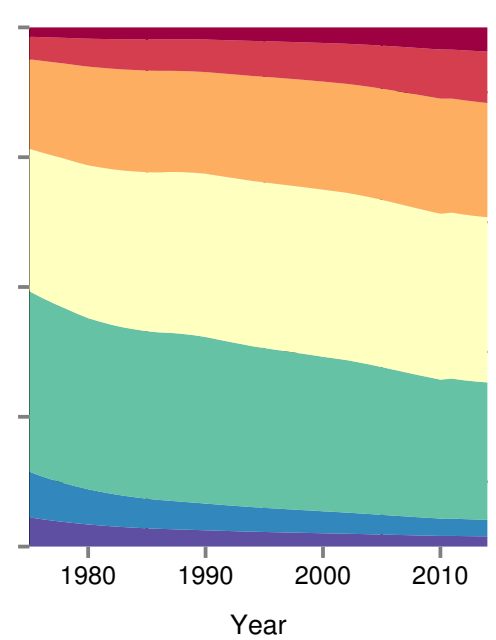

■ BMI <18.5 ■ BMI 18.5-20 ■ BMI 20-25 ■ BMI 25-30 ■ BMI 30-35 ■ BMI 35-40 ■ BMI ≥ 40

Lithuania  
Eastern Europe

Men

Women

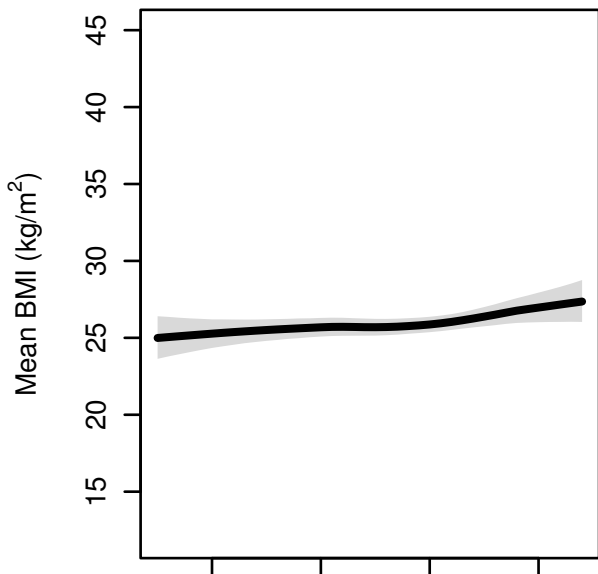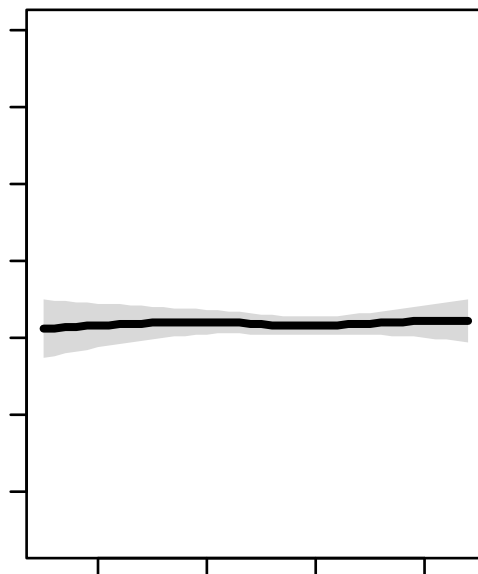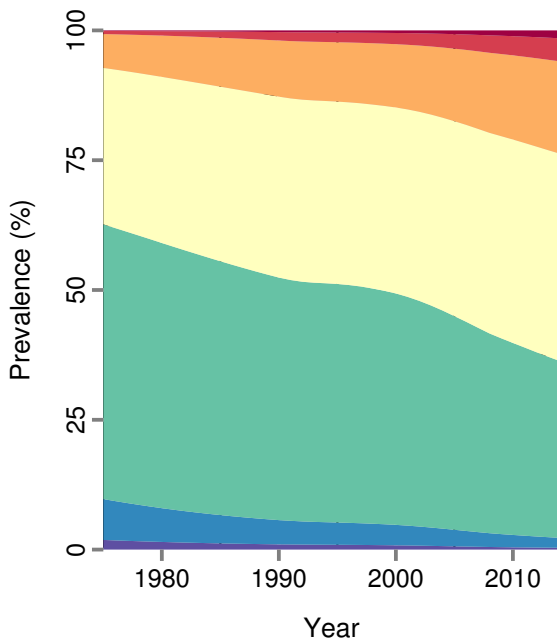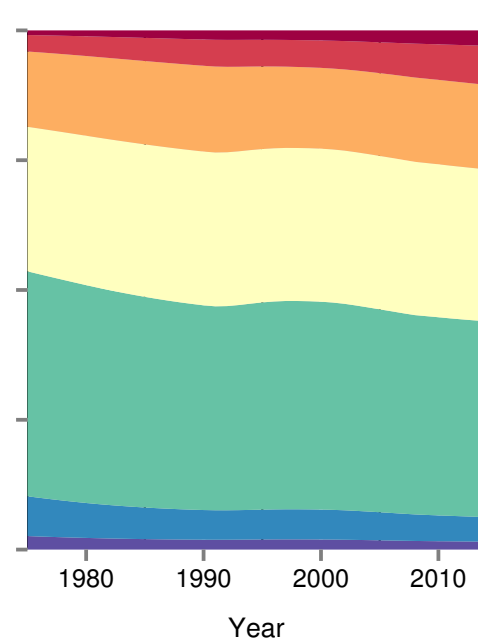

■ BMI <18.5 ■ BMI 18.5-20 ■ BMI 20-25 ■ BMI 25-30 ■ BMI 30-35 ■ BMI 35-40 ■ BMI ≥ 40

Luxembourg  
North Western Europe

Men

Women

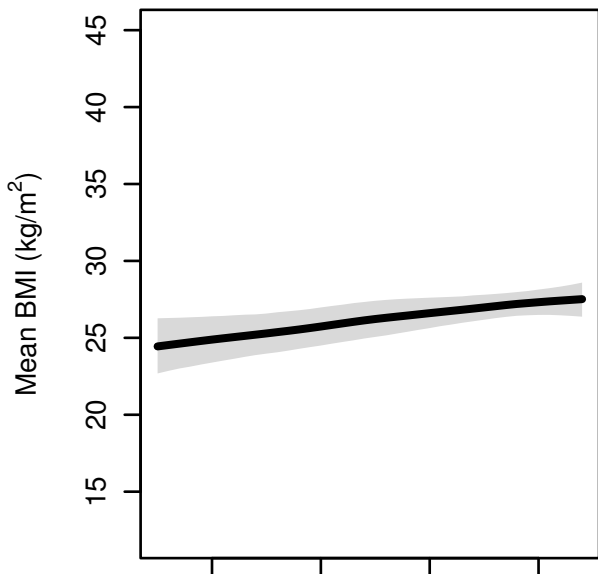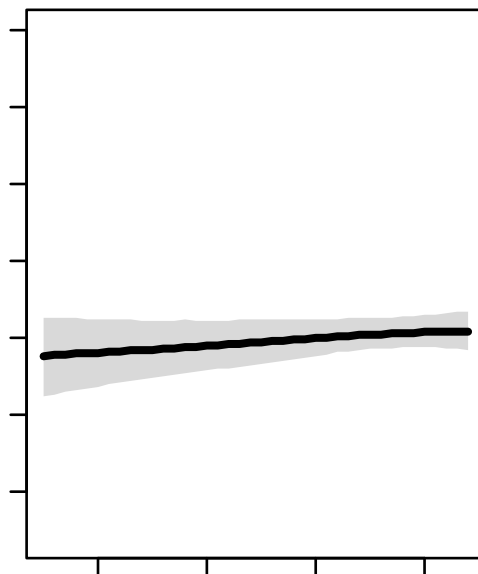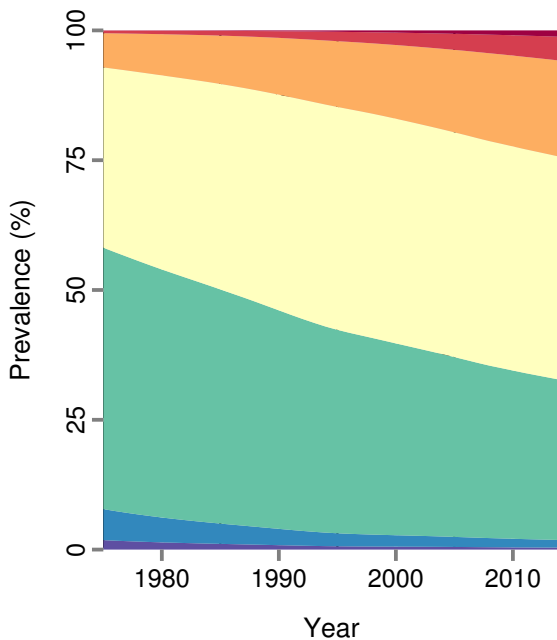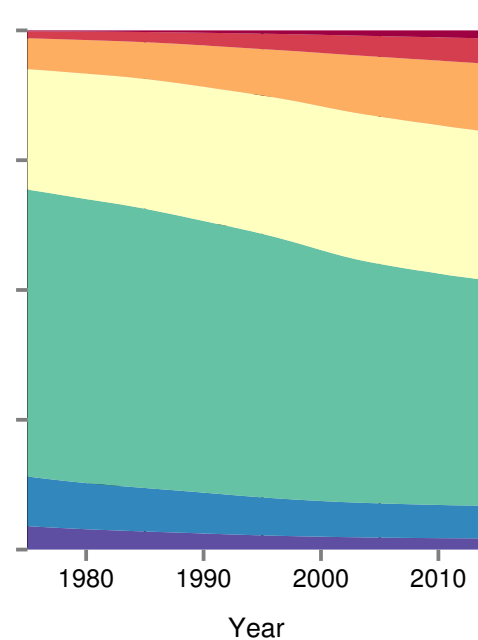

■ BMI <18.5 ■ BMI 18.5-20 ■ BMI 20-25 ■ BMI 25-30 ■ BMI 30-35 ■ BMI 35-40 ■ BMI ≥ 40

# Macedonia (TFYR)

Central Europe

## Men

## Women

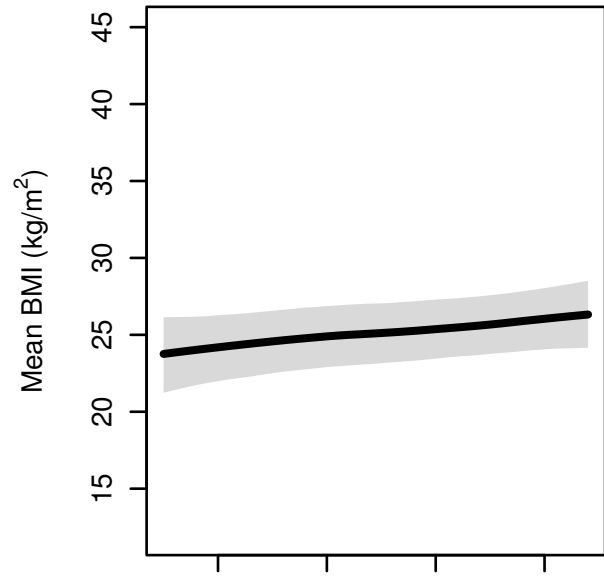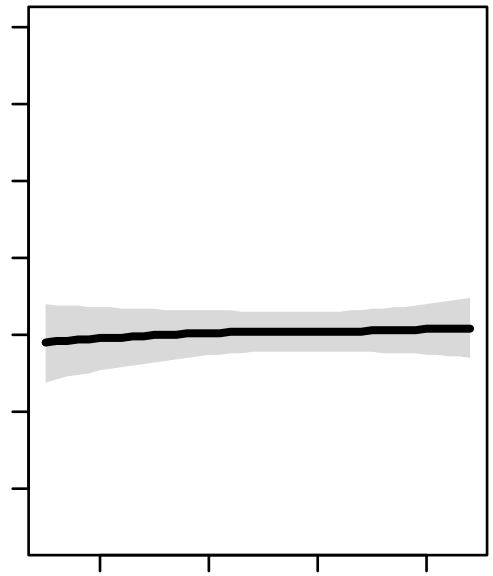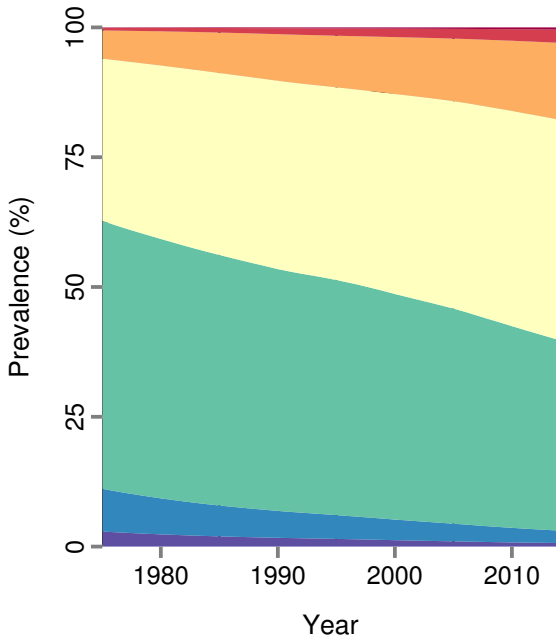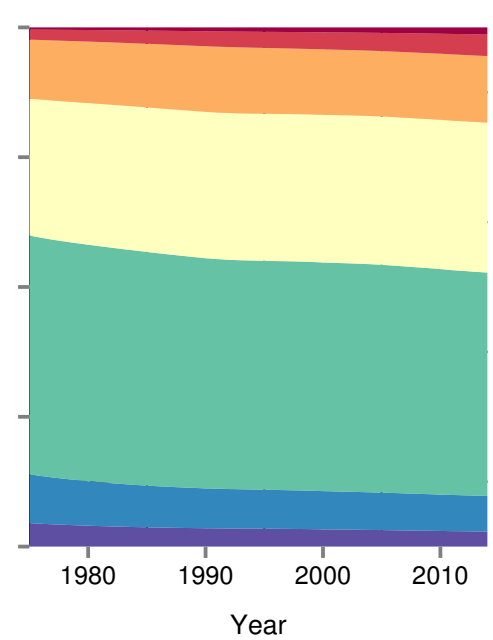

■ BMI <18.5 ■ BMI 18.5-20 ■ BMI 20-25 ■ BMI 25-30 ■ BMI 30-35 ■ BMI 35-40 ■ BMI ≥ 40

Madagascar  
East Africa

Men

Women

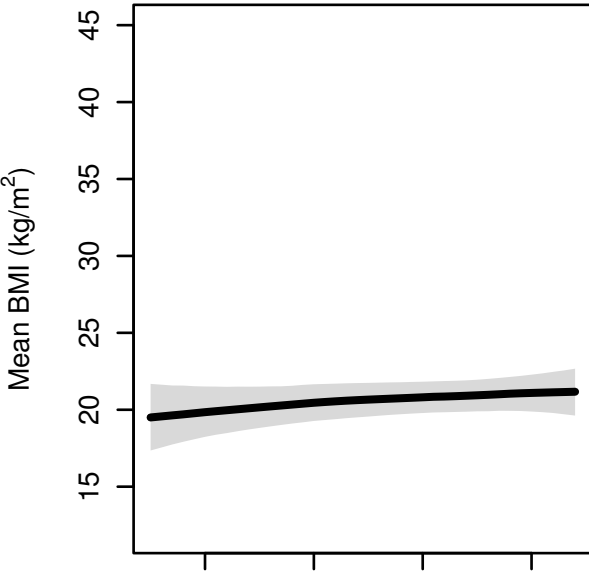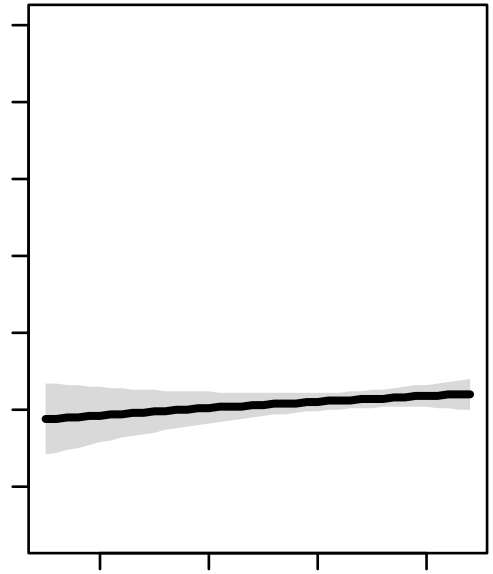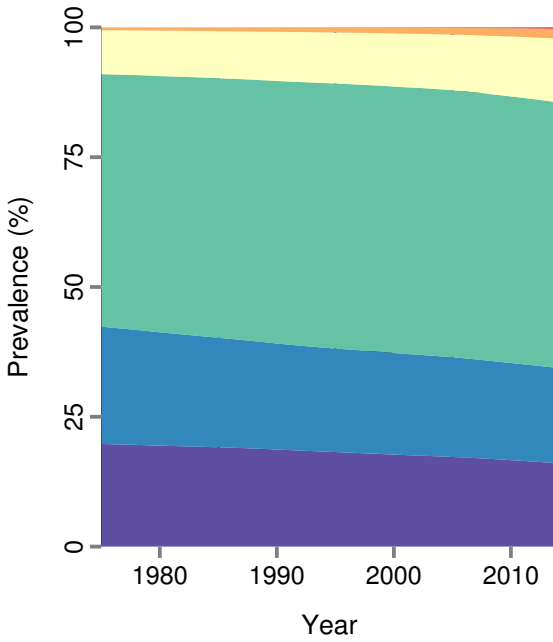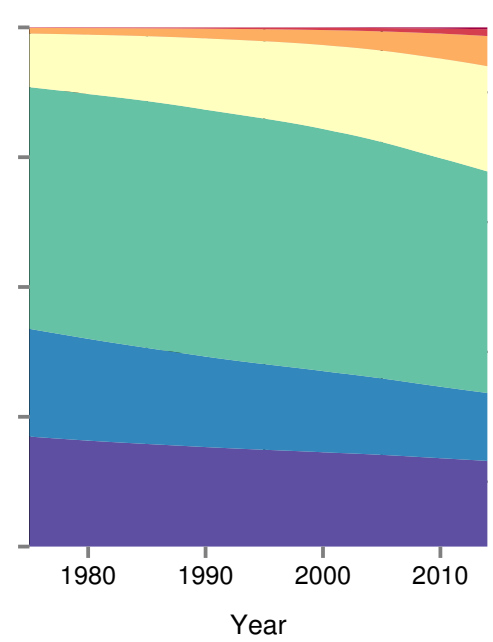

■ BMI <18.5 ■ BMI 18.5-20 ■ BMI 20-25 ■ BMI 25-30 ■ BMI 30-35 ■ BMI 35-40 ■ BMI ≥ 40

Malawi  
East Africa

Men

Women

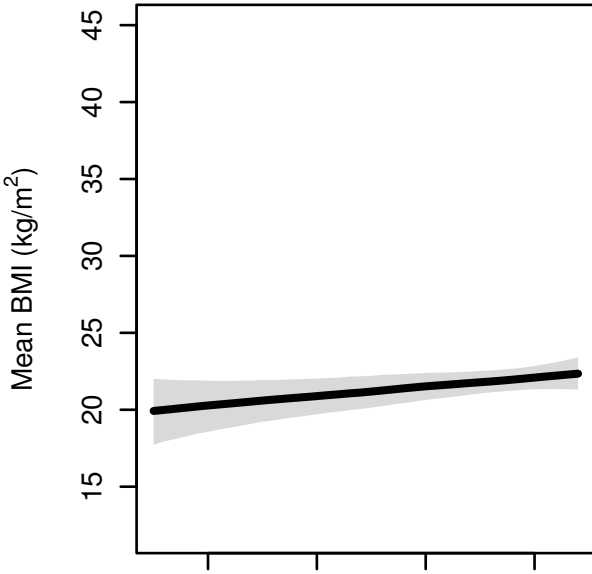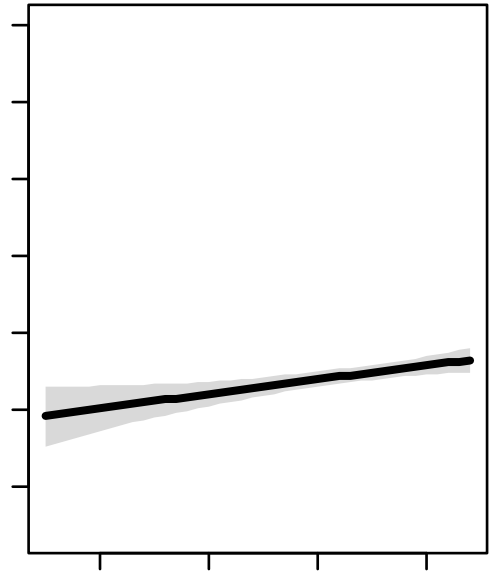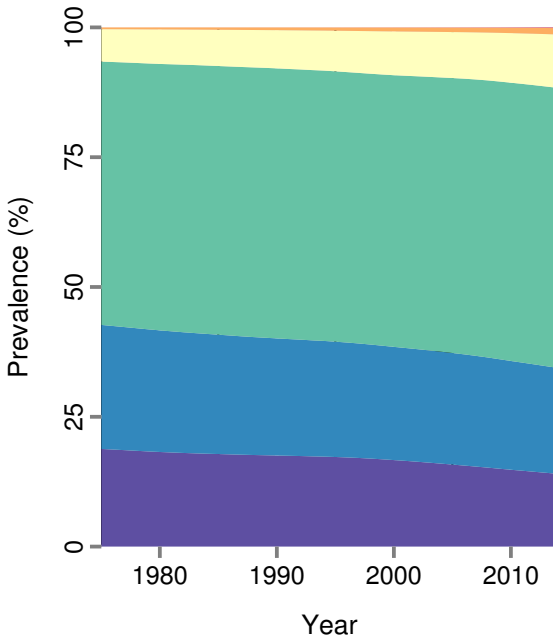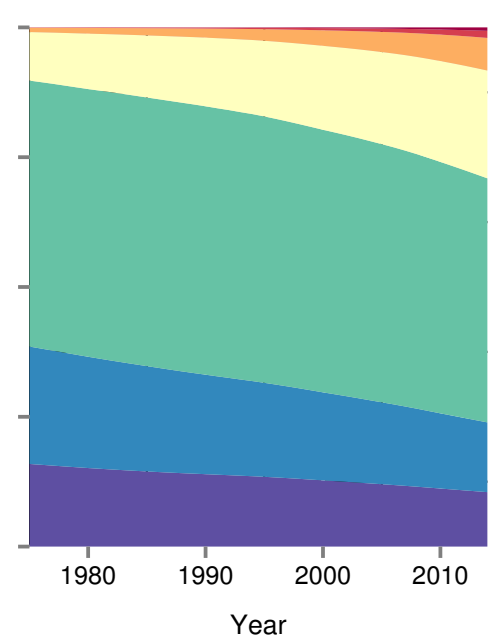

■ BMI <18.5 ■ BMI 18.5-20 ■ BMI 20-25 ■ BMI 25-30 ■ BMI 30-35 ■ BMI 35-40 ■ BMI ≥ 40



Malaysia  
South East Asia

Men

Women

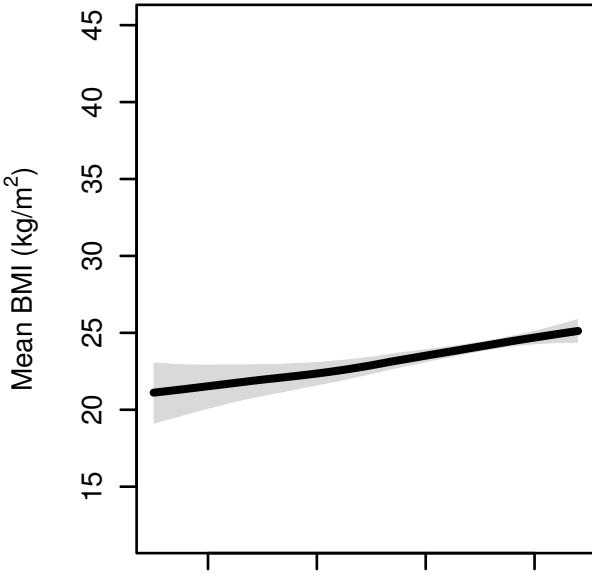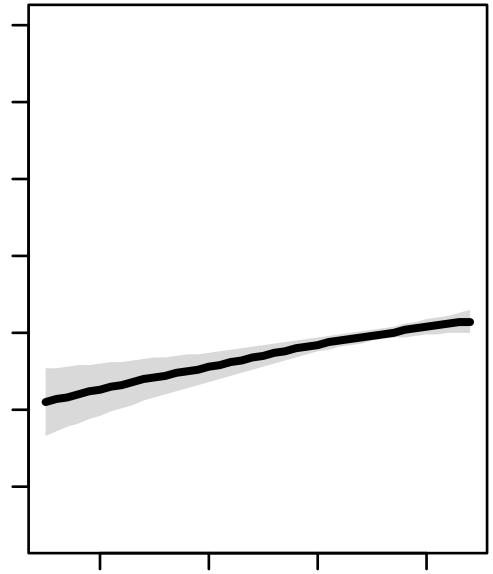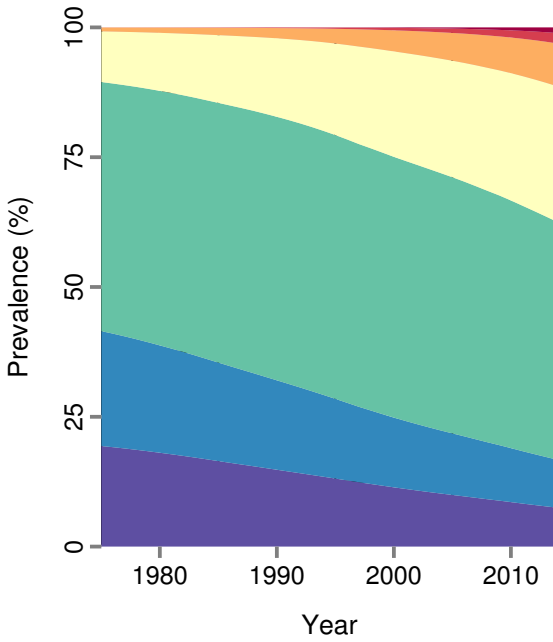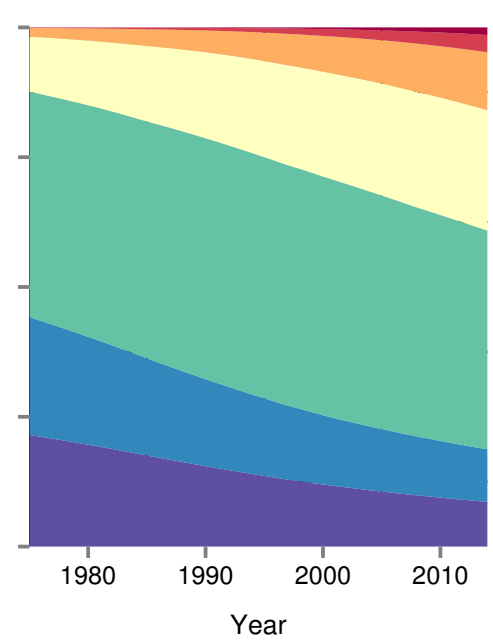

■ BMI <18.5 ■ BMI 18.5-20 ■ BMI 20-25 ■ BMI 25-30 ■ BMI 30-35 ■ BMI 35-40 ■ BMI ≥ 40

Maldives  
South East Asia

Men

Women

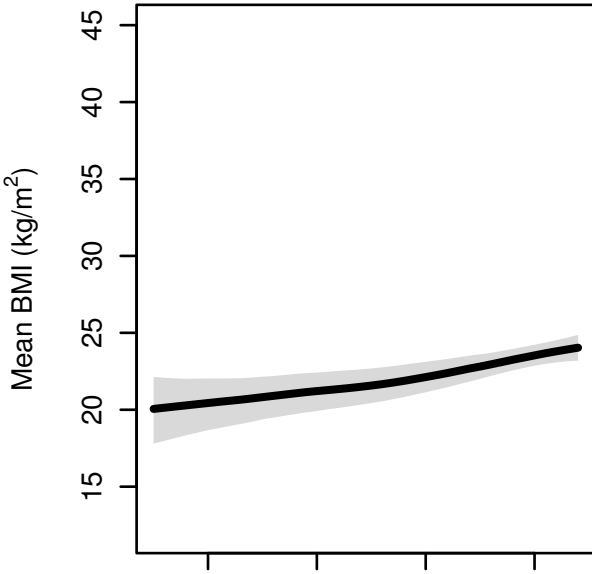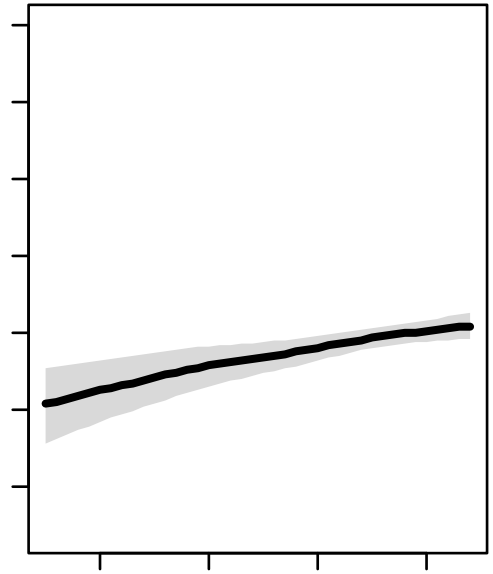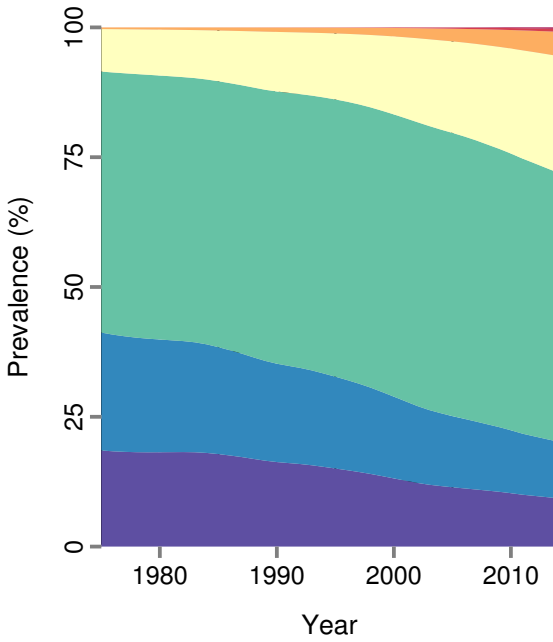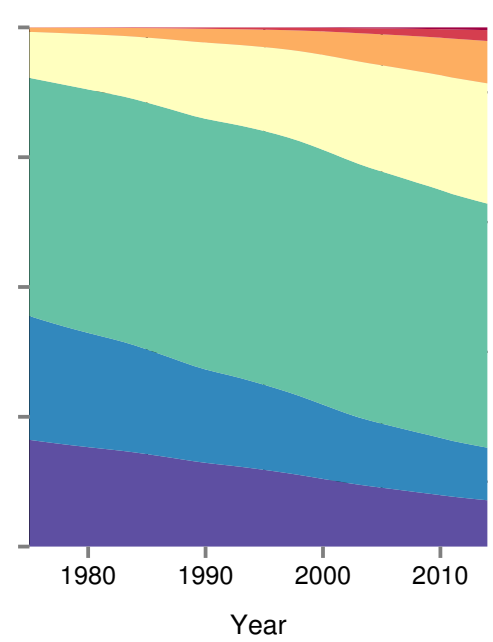

■ BMI <18.5 ■ BMI 18.5-20 ■ BMI 20-25 ■ BMI 25-30 ■ BMI 30-35 ■ BMI 35-40 ■ BMI ≥ 40

Mali  
West Africa

Men

Women

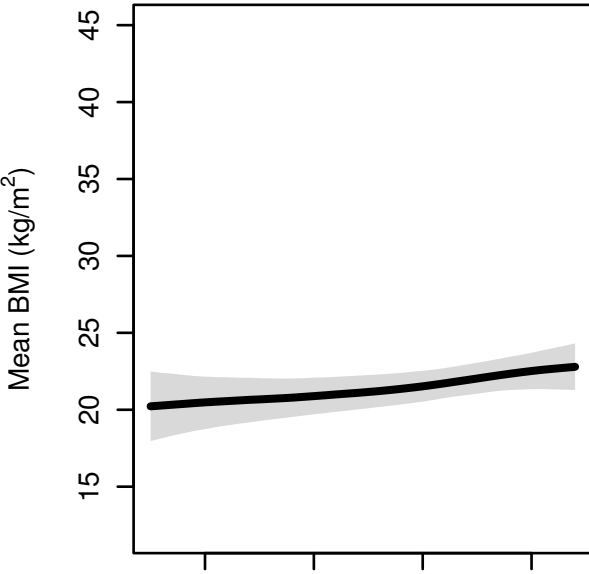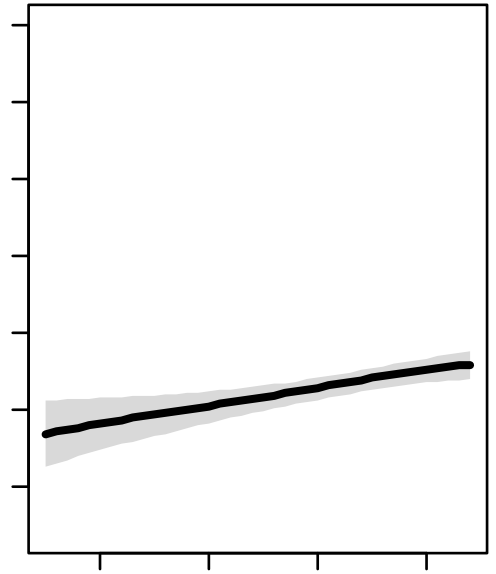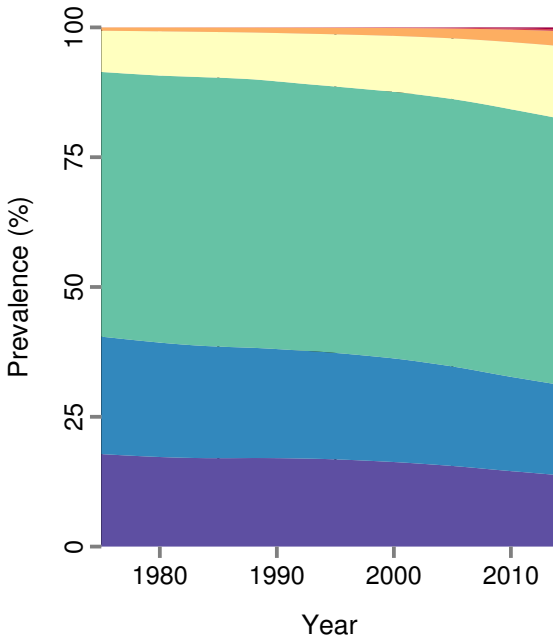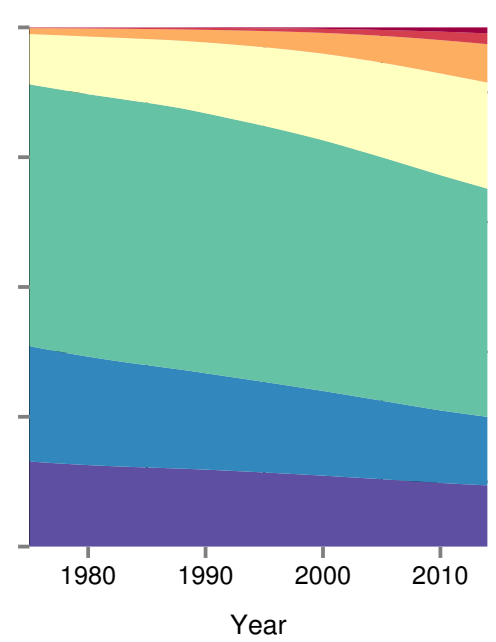

■ BMI <18.5 ■ BMI 18.5-20 ■ BMI 20-25 ■ BMI 25-30 ■ BMI 30-35 ■ BMI 35-40 ■ BMI ≥ 40

Malta  
South Western Europe

Men

Women

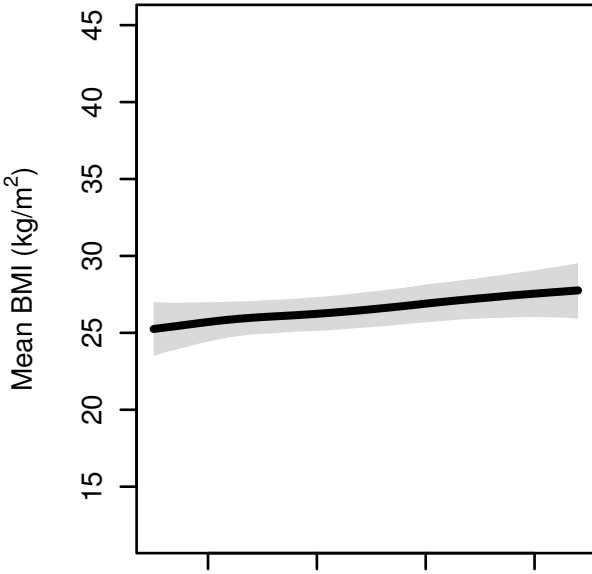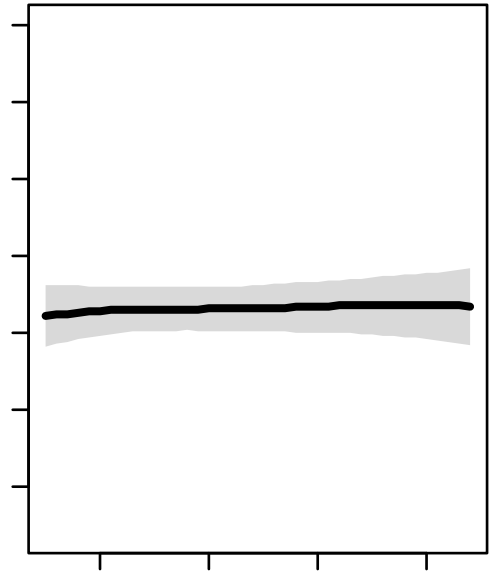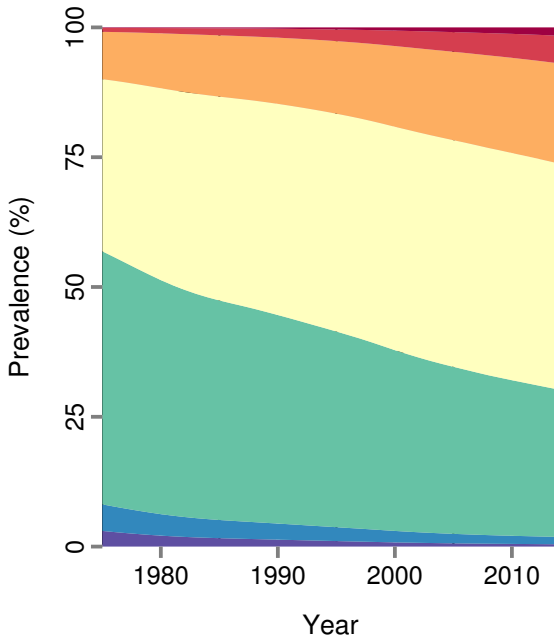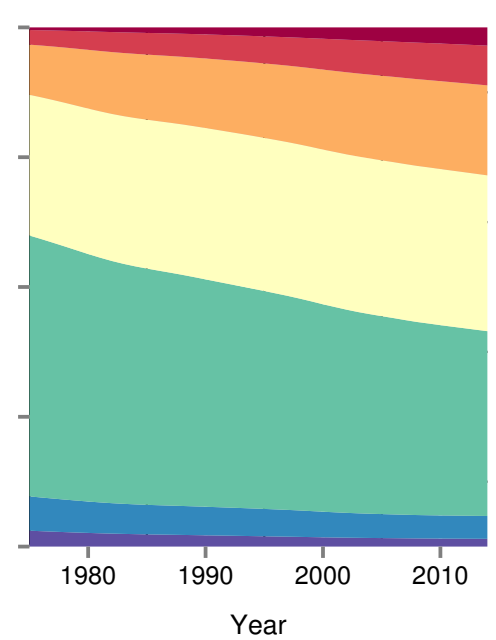

■ BMI <18.5 ■ BMI 18.5-20 ■ BMI 20-25 ■ BMI 25-30 ■ BMI 30-35 ■ BMI 35-40 ■ BMI ≥ 40

# Marshall Islands Polynesia and Micronesia

## Men

## Women

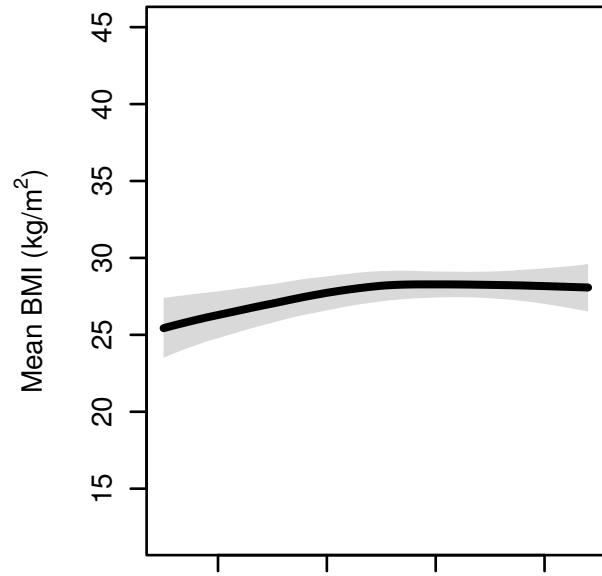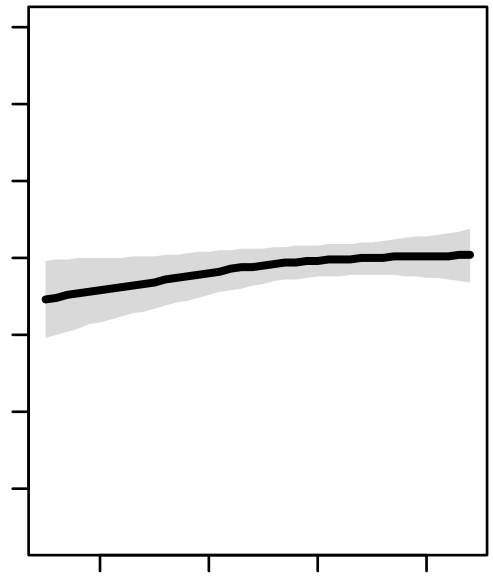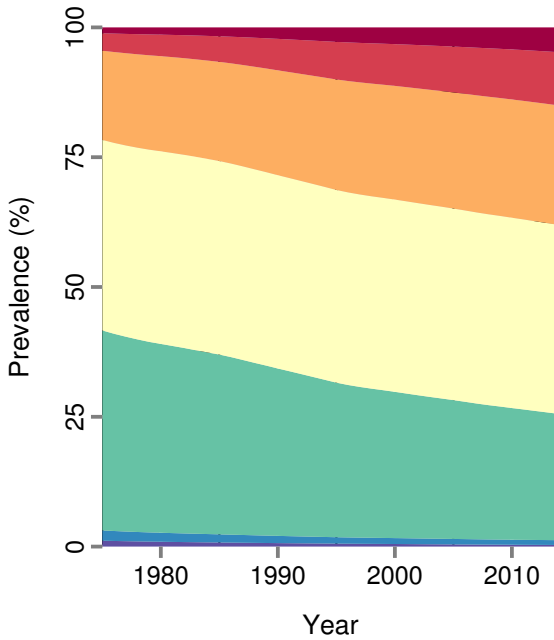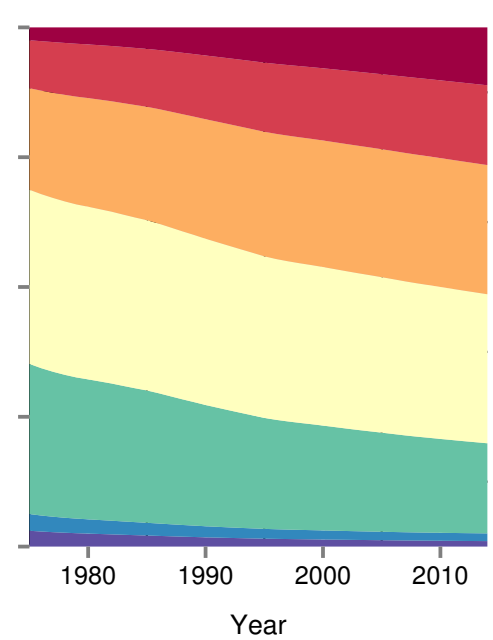

■ BMI <18.5 ■ BMI 18.5-20 ■ BMI 20-25 ■ BMI 25-30 ■ BMI 30-35 ■ BMI 35-40 ■ BMI ≥ 40

Mauritania  
West Africa

Men

Women

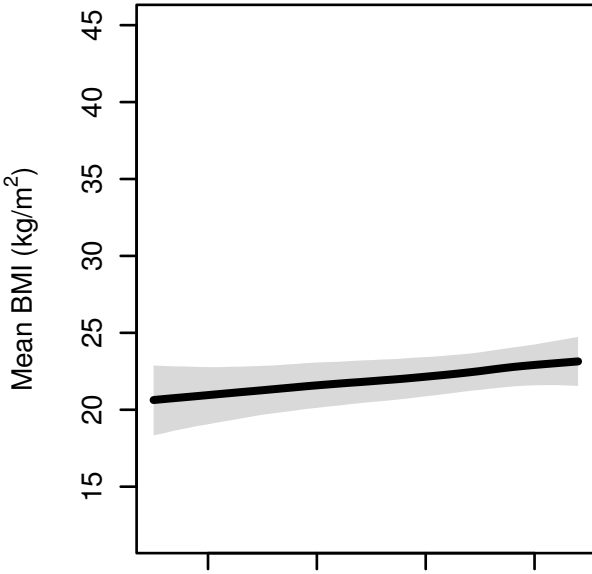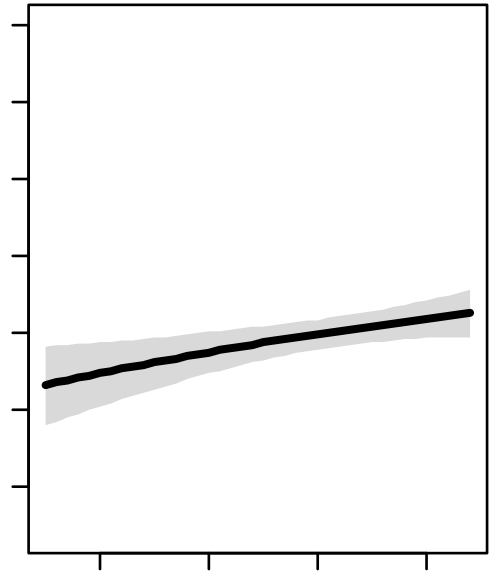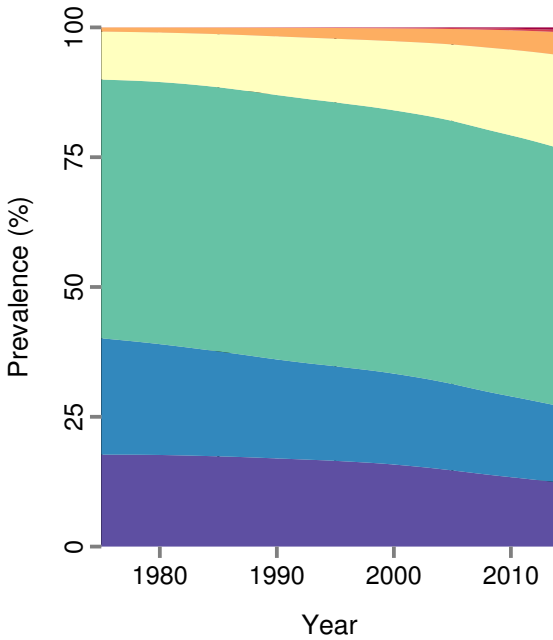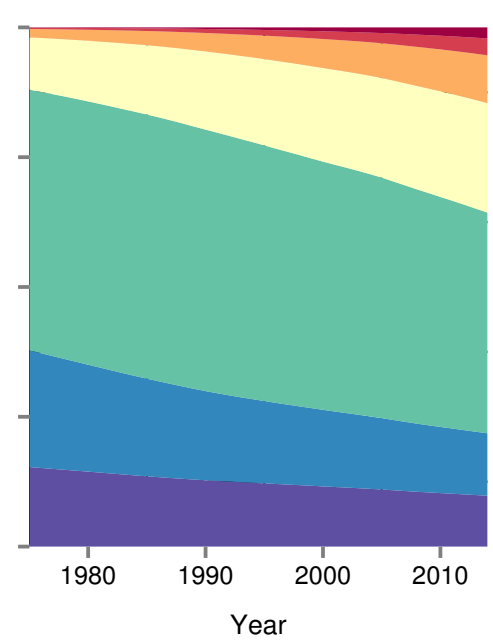

■ BMI <18.5 ■ BMI 18.5-20 ■ BMI 20-25 ■ BMI 25-30 ■ BMI 30-35 ■ BMI 35-40 ■ BMI ≥ 40

Mauritius  
East Africa

Men

Women

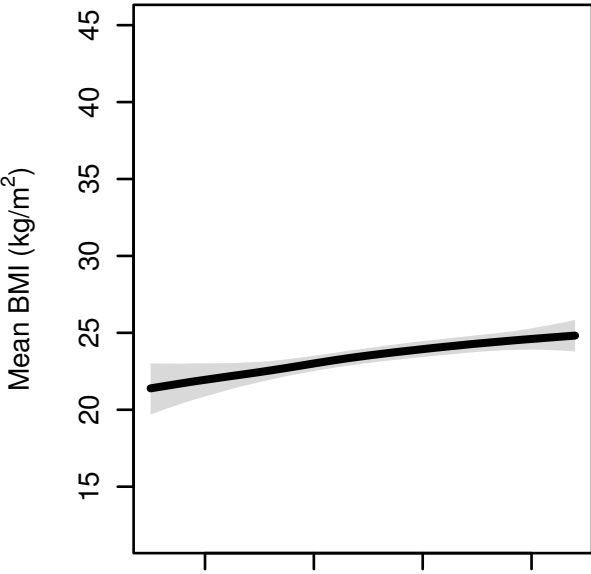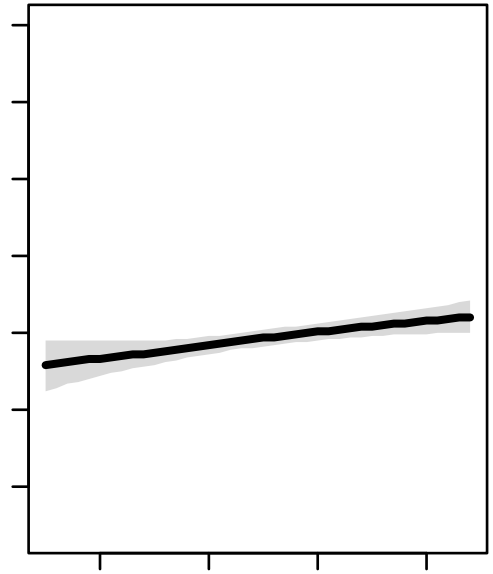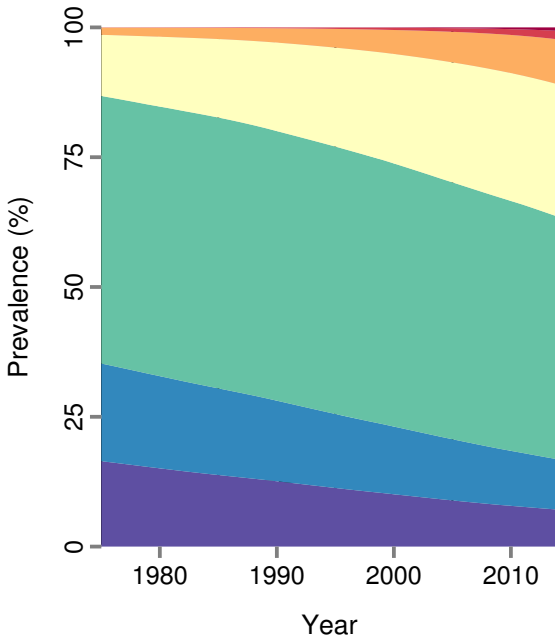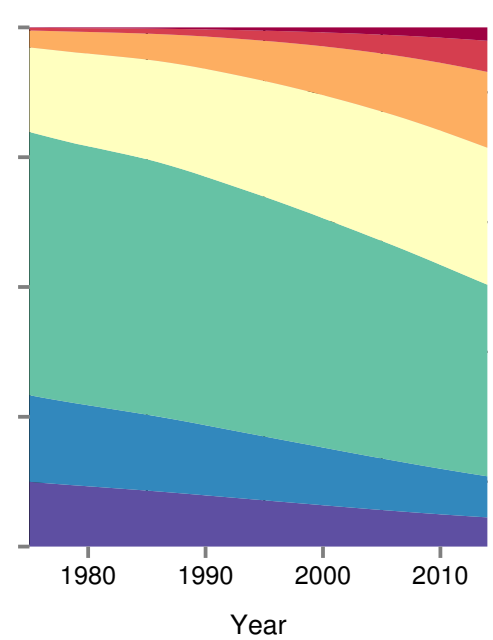

■ BMI <18.5 ■ BMI 18.5-20 ■ BMI 20-25 ■ BMI 25-30 ■ BMI 30-35 ■ BMI 35-40 ■ BMI ≥ 40

Mexico  
Central Latin America

Men

Women

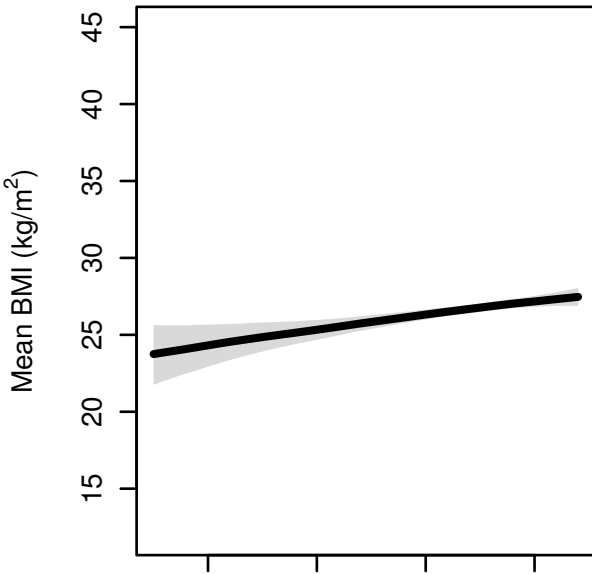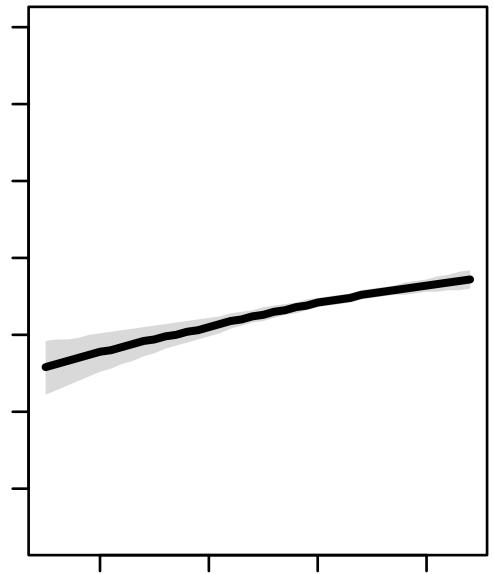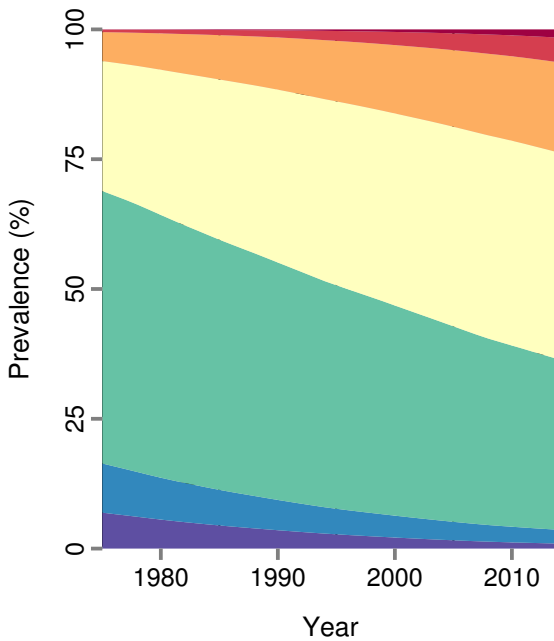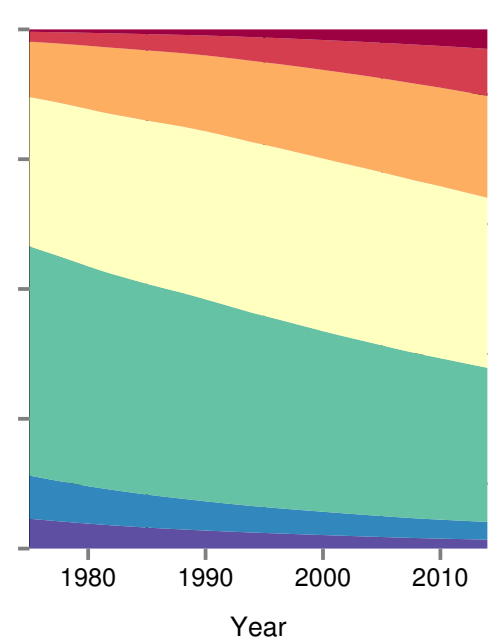

■ BMI <18.5 ■ BMI 18.5-20 ■ BMI 20-25 ■ BMI 25-30 ■ BMI 30-35 ■ BMI 35-40 ■ BMI ≥ 40



# Micronesia (Federated States of) Polynesia and Micronesia

## Men

## Women

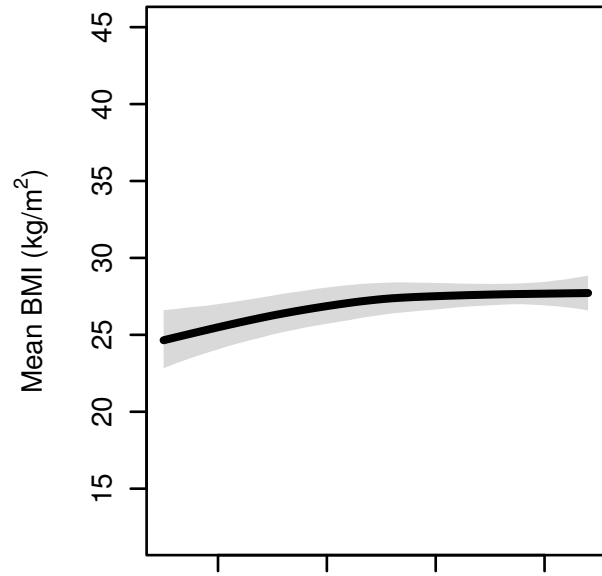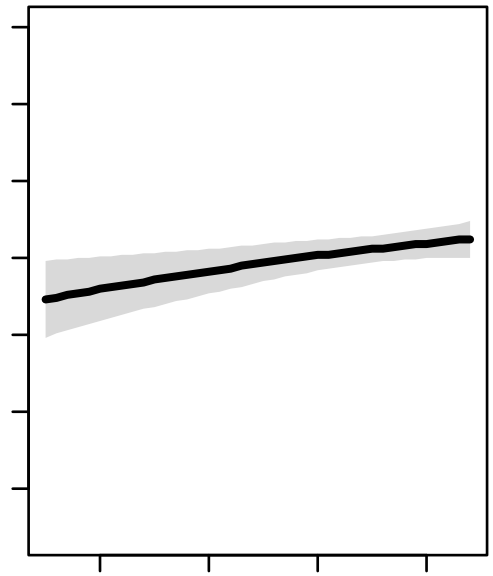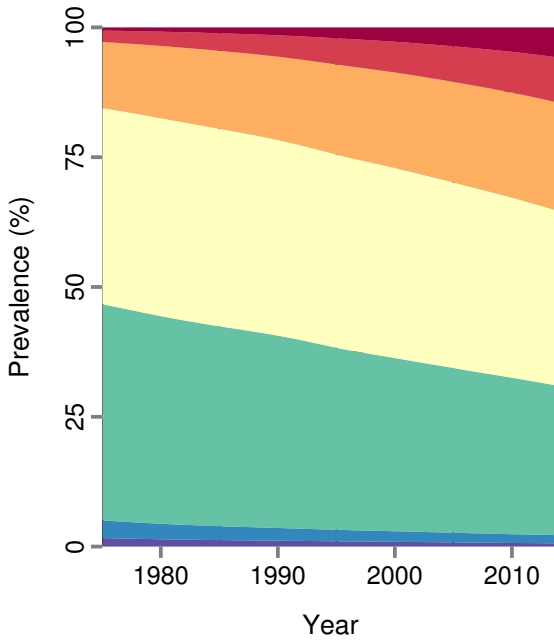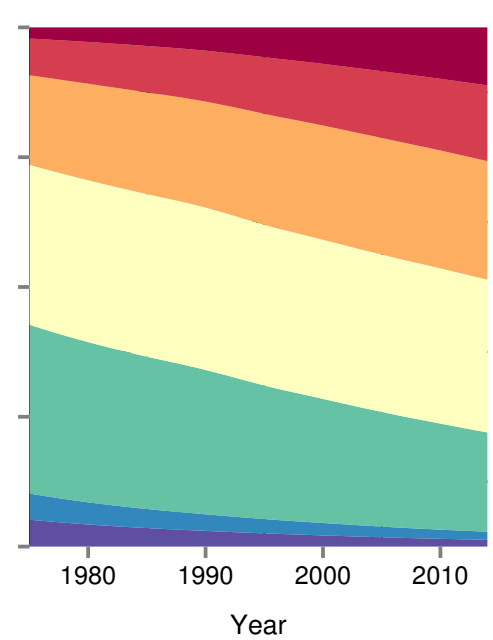

■ BMI <18.5 ■ BMI 18.5-20 ■ BMI 20-25 ■ BMI 25-30 ■ BMI 30-35 ■ BMI 35-40 ■ BMI ≥ 40

Moldova  
Eastern Europe

Men

Women

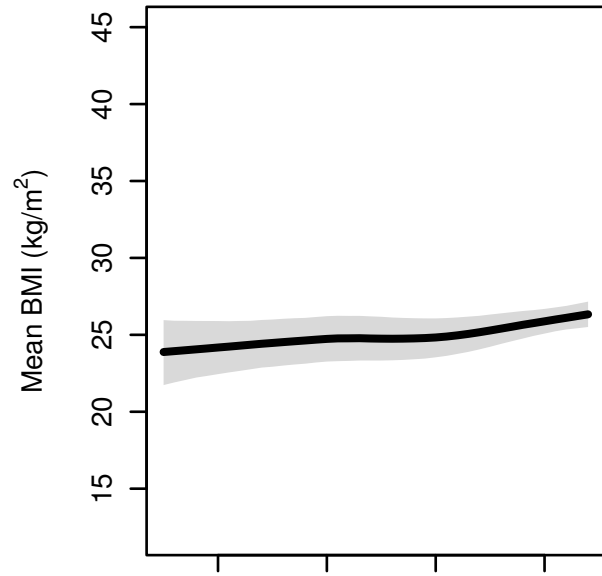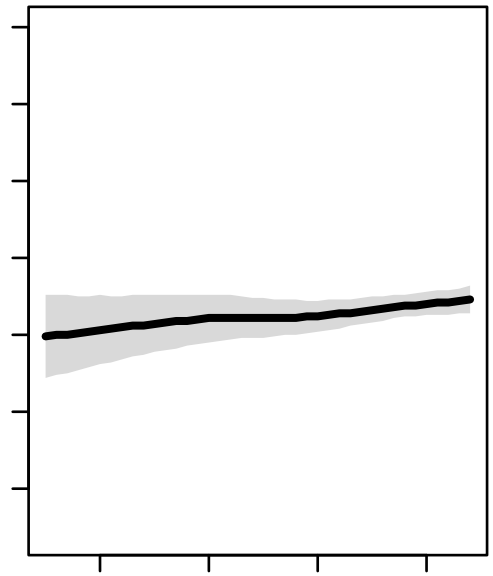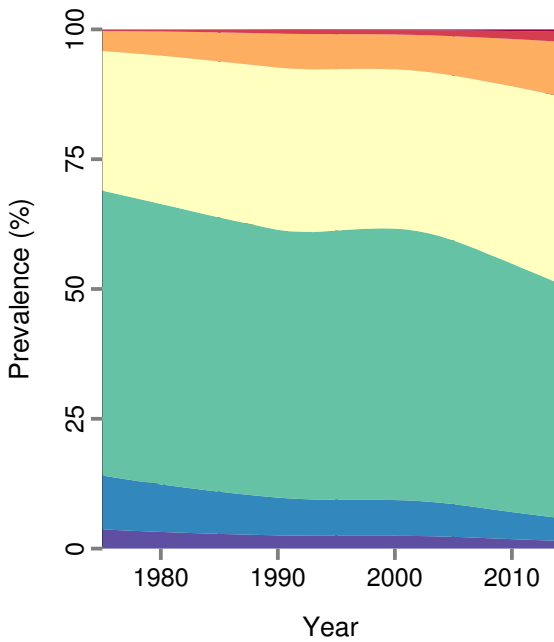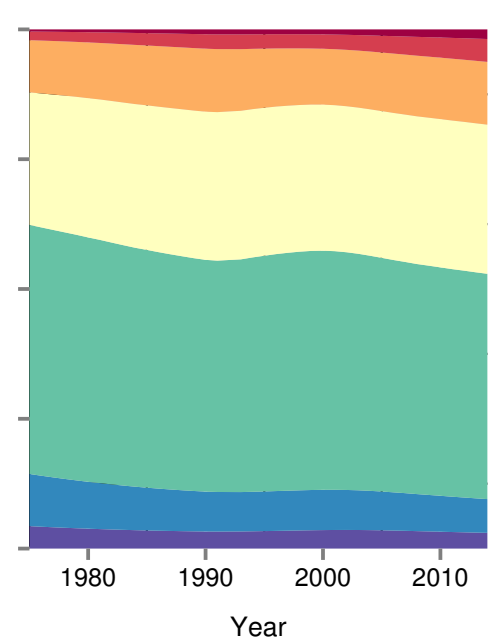

■ BMI <18.5 ■ BMI 18.5-20 ■ BMI 20-25 ■ BMI 25-30 ■ BMI 30-35 ■ BMI 35-40 ■ BMI ≥ 40

Mongolia  
Central Asia

Men

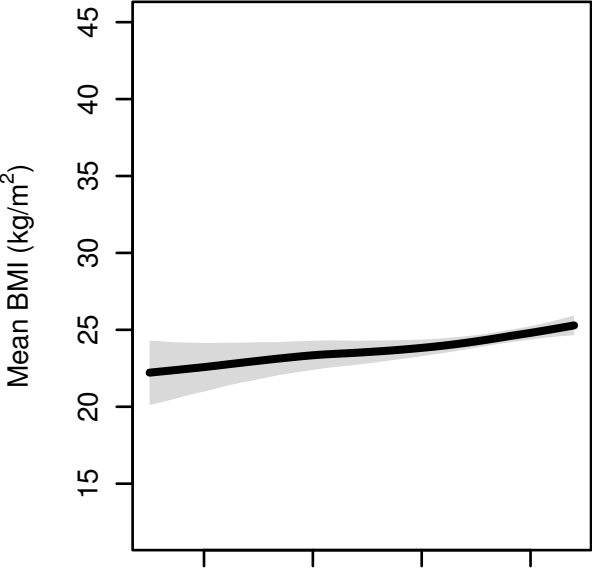

Women

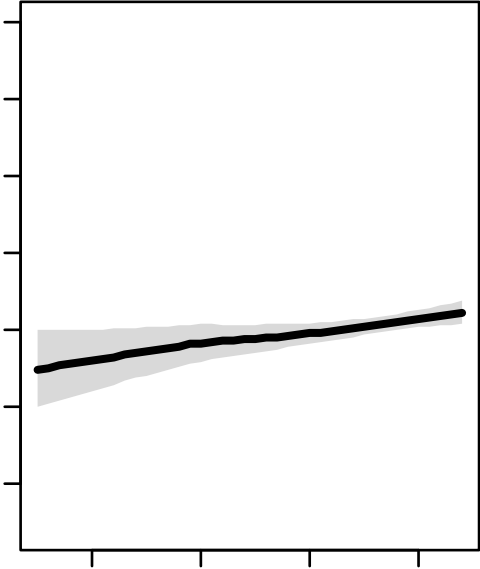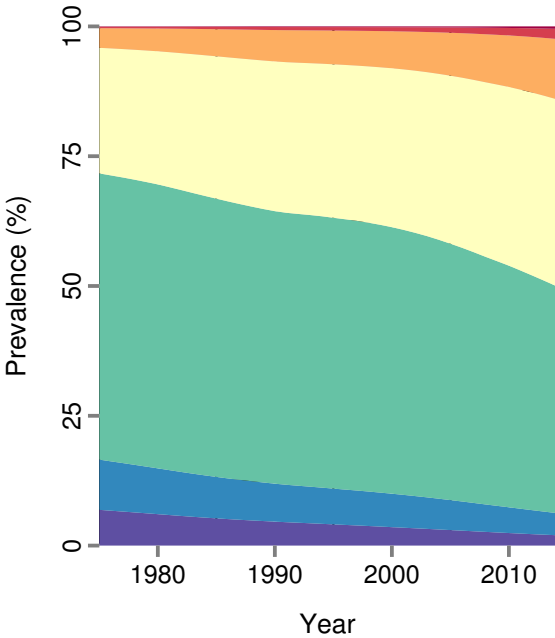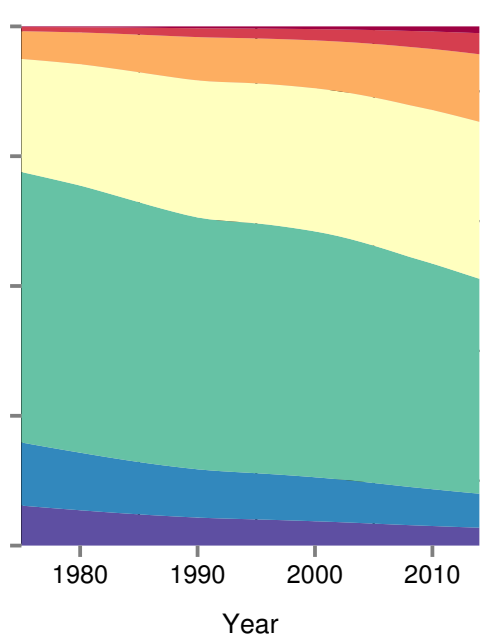

■ BMI <18.5 ■ BMI 18.5-20 ■ BMI 20-25 ■ BMI 25-30 ■ BMI 30-35 ■ BMI 35-40 ■ BMI ≥ 40

Montenegro  
Central Europe

Men

Women

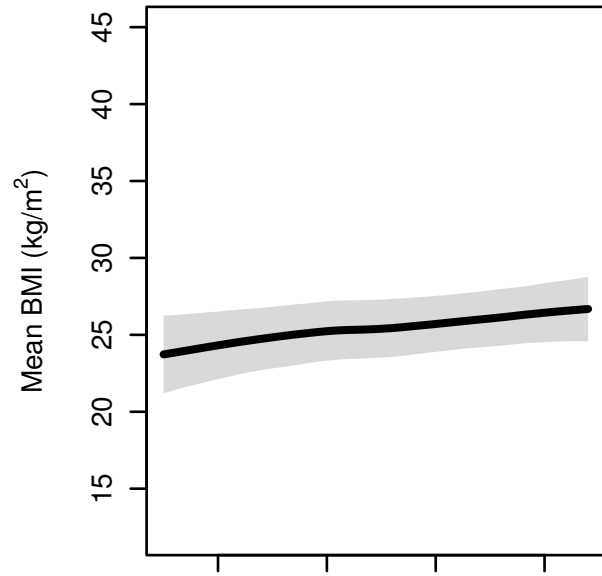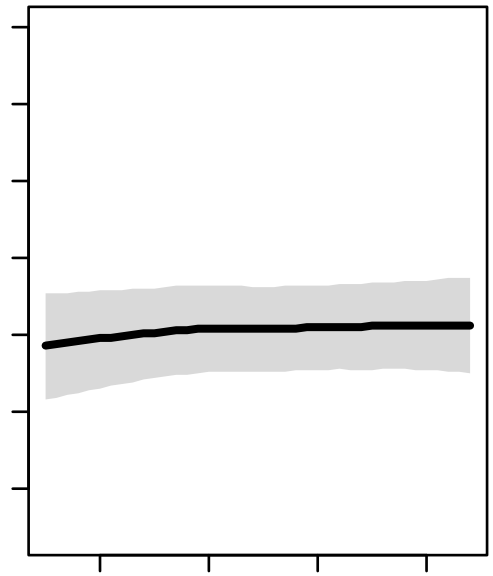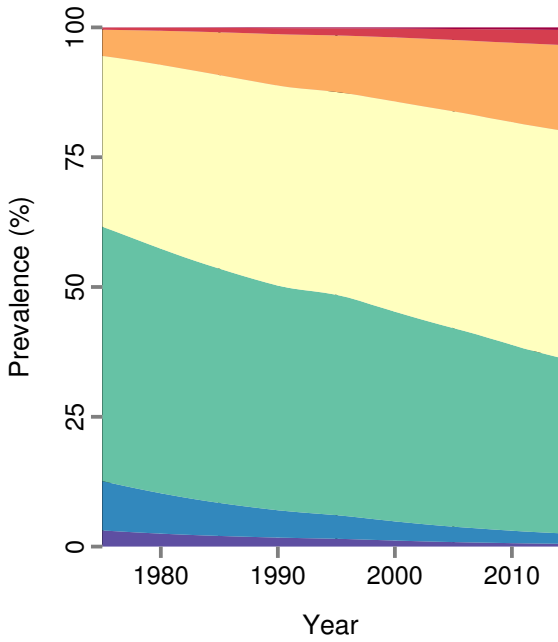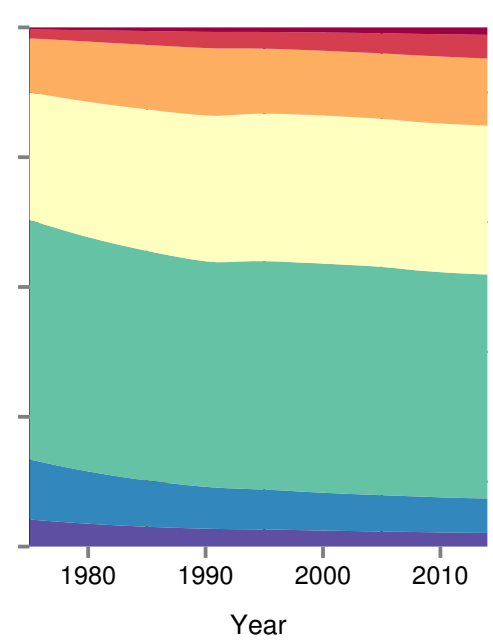

■ BMI <18.5 ■ BMI 18.5-20 ■ BMI 20-25 ■ BMI 25-30 ■ BMI 30-35 ■ BMI 35-40 ■ BMI ≥ 40

Morocco  
Middle East and North Africa

Men

Women

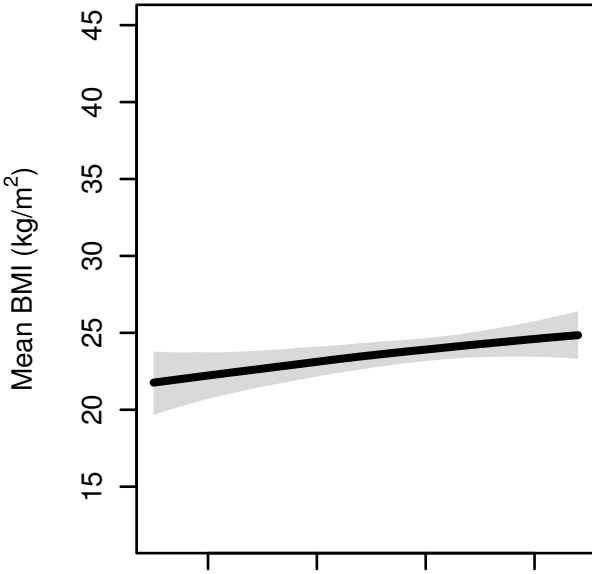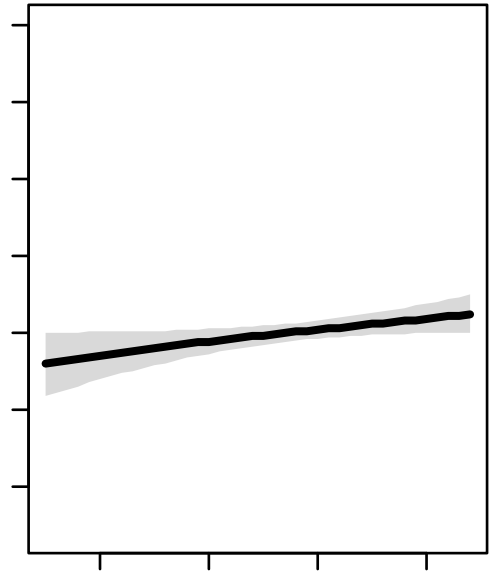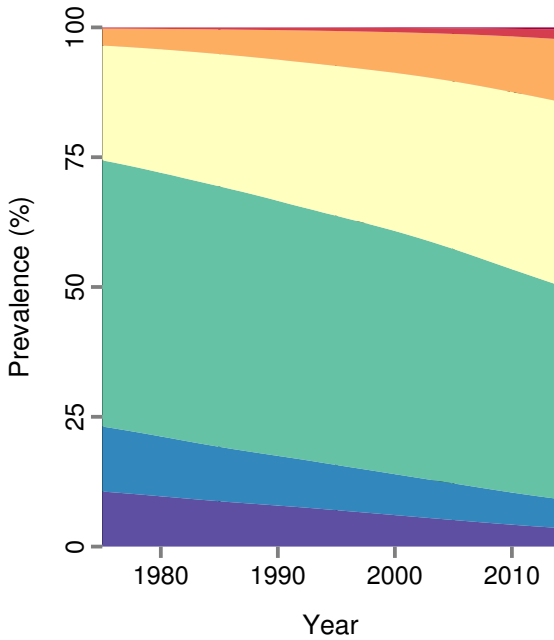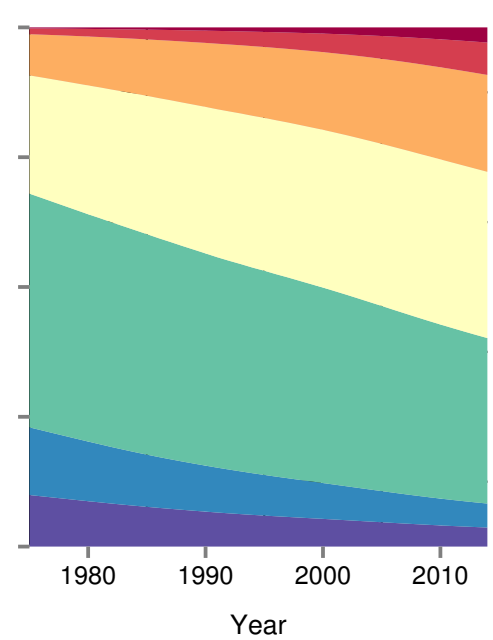

■ BMI <18.5 ■ BMI 18.5-20 ■ BMI 20-25 ■ BMI 25-30 ■ BMI 30-35 ■ BMI 35-40 ■ BMI ≥ 40

# Mozambique East Africa

## Men

## Women

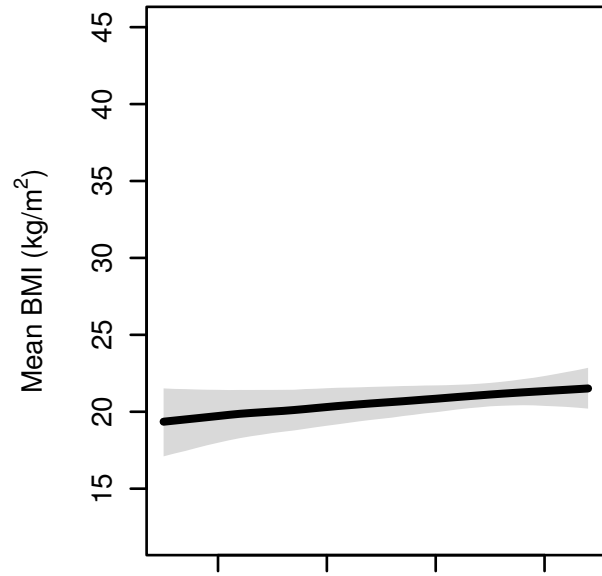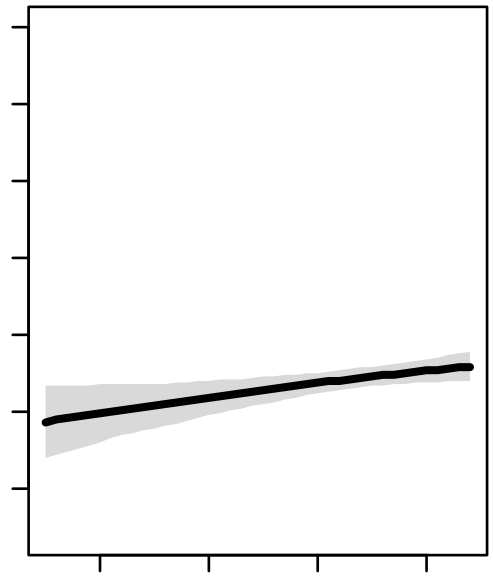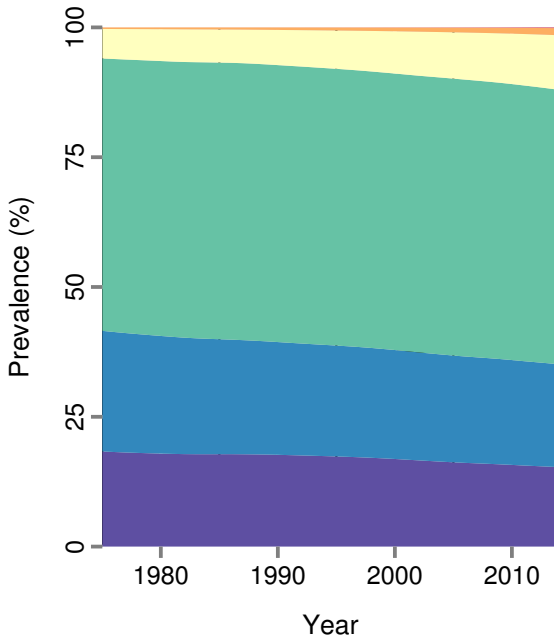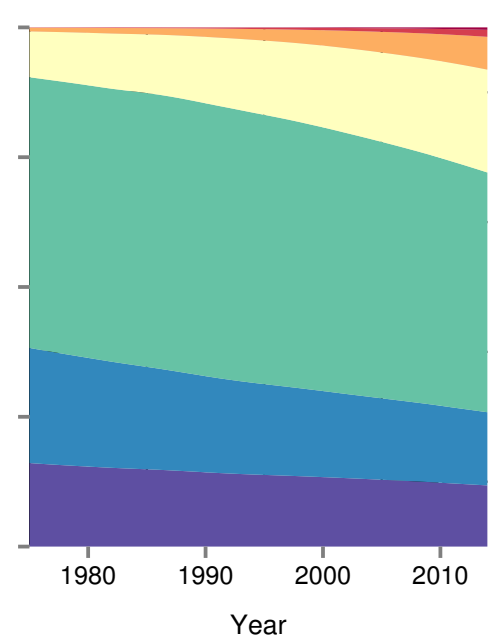

■ BMI <18.5 ■ BMI 18.5-20 ■ BMI 20-25 ■ BMI 25-30 ■ BMI 30-35 ■ BMI 35-40 ■ BMI ≥ 40

Myanmar  
South East Asia

Men

Women

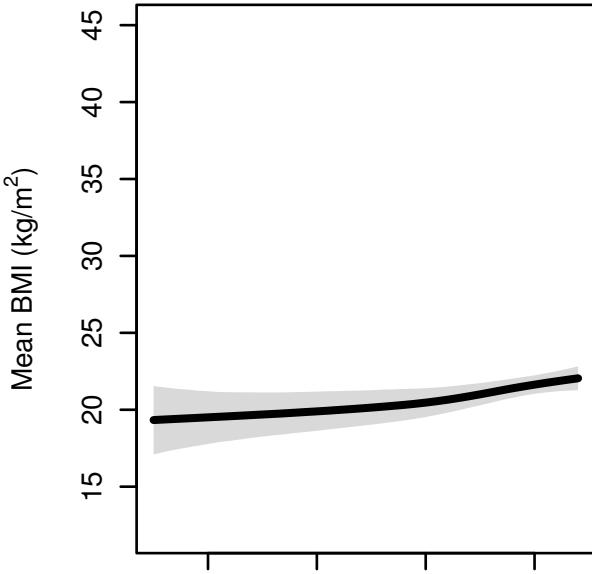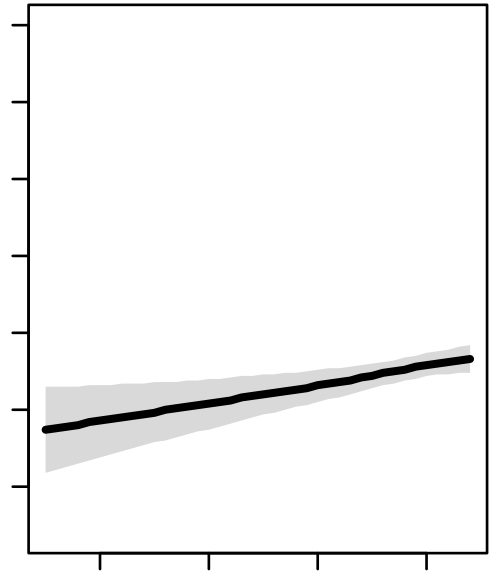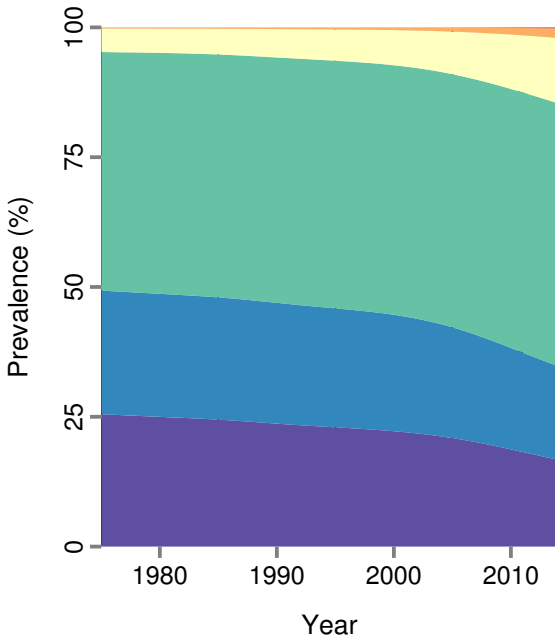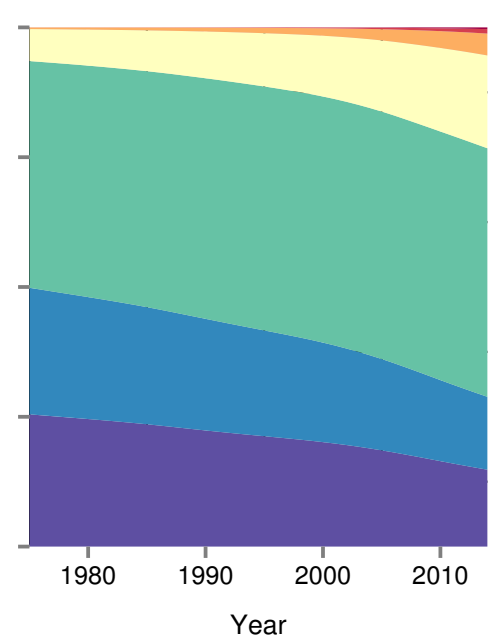

■ BMI <18.5 ■ BMI 18.5-20 ■ BMI 20-25 ■ BMI 25-30 ■ BMI 30-35 ■ BMI 35-40 ■ BMI ≥ 40

Namibia  
Southern Africa

Men

Women

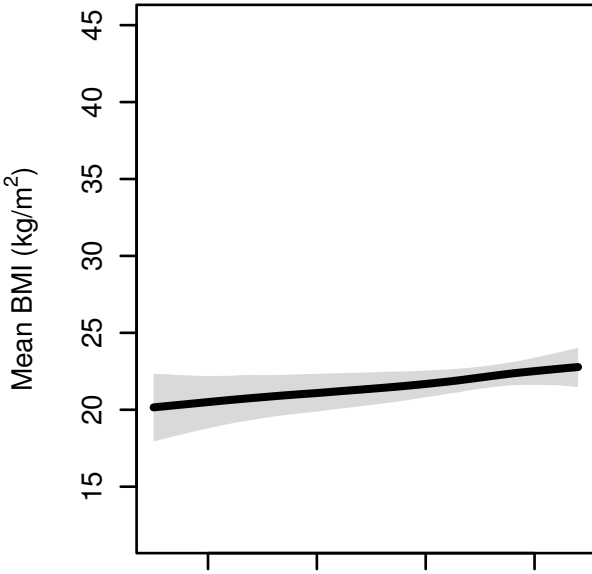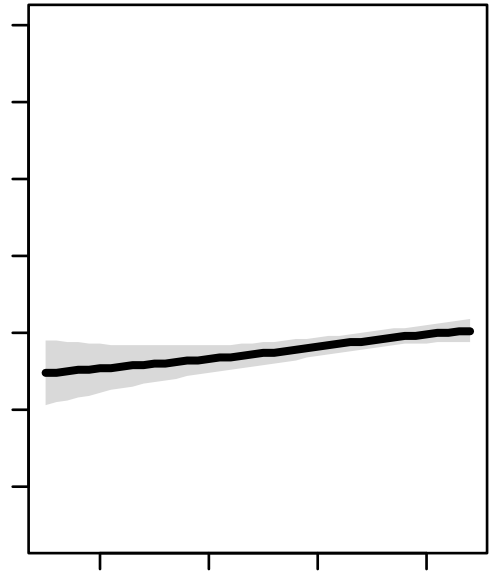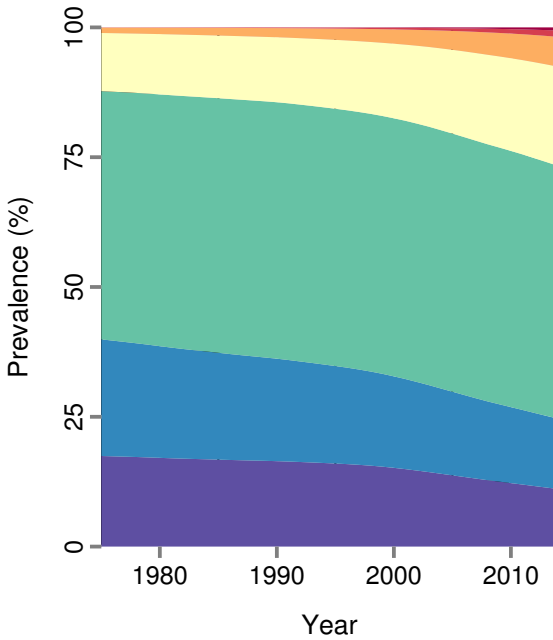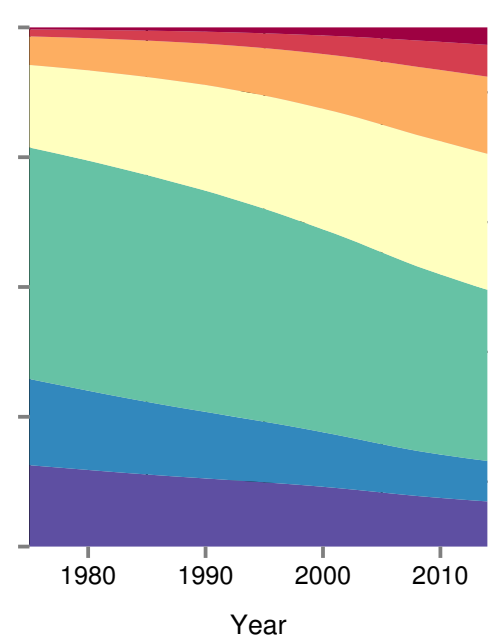

■ BMI <18.5 ■ BMI 18.5-20 ■ BMI 20-25 ■ BMI 25-30 ■ BMI 30-35 ■ BMI 35-40 ■ BMI ≥ 40



# Nauru

Polynesia and Micronesia

## Men

## Women

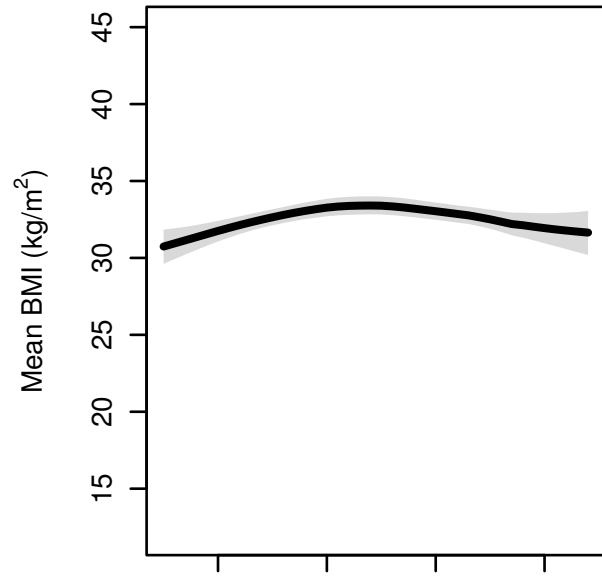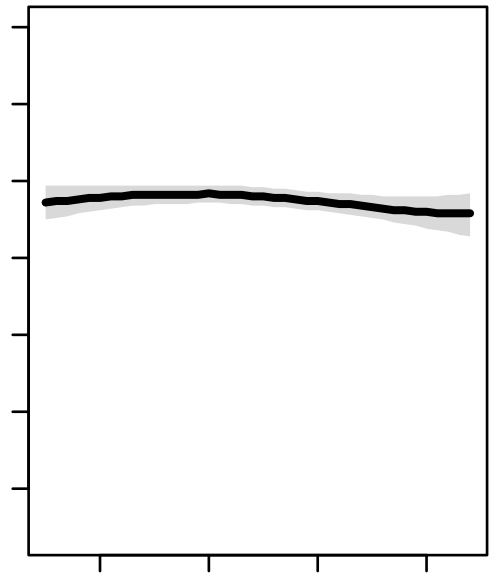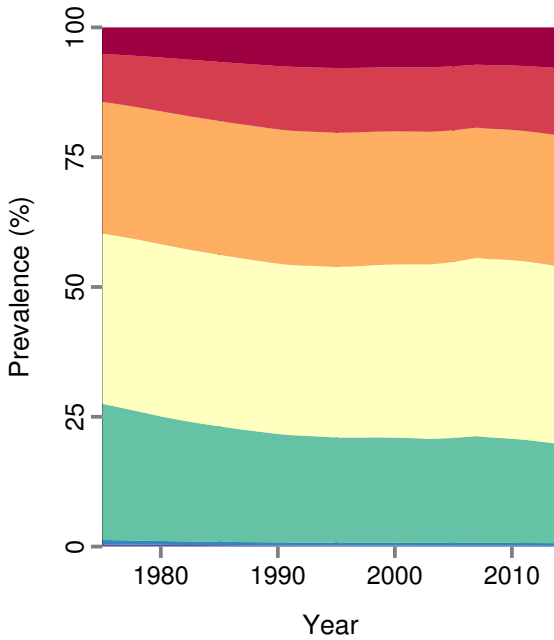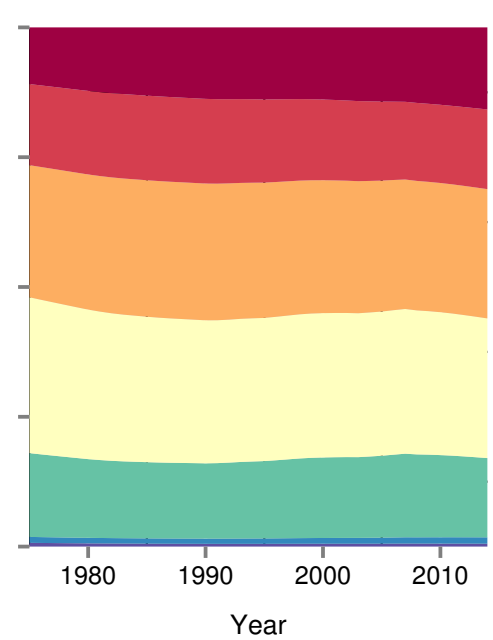

■ BMI <18.5 ■ BMI 18.5-20 ■ BMI 20-25 ■ BMI 25-30 ■ BMI 30-35 ■ BMI 35-40 ■ BMI ≥ 40

Nepal  
South Asia

Men

Women

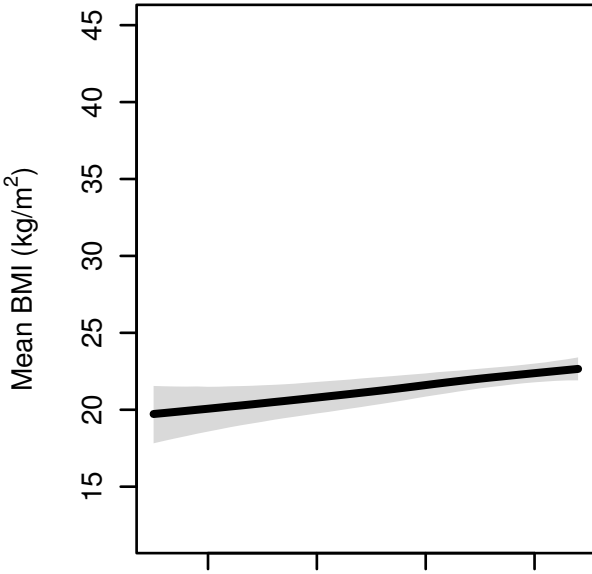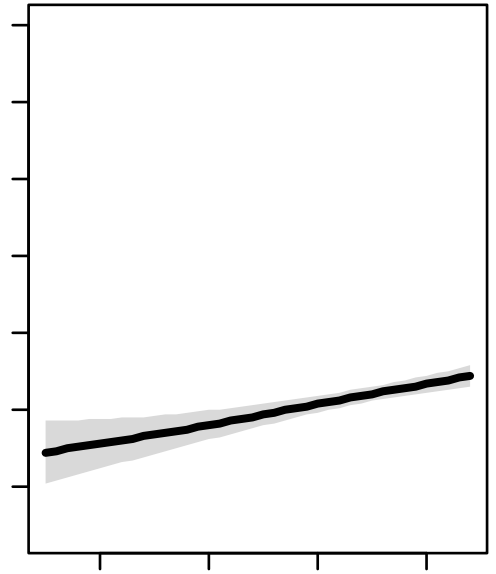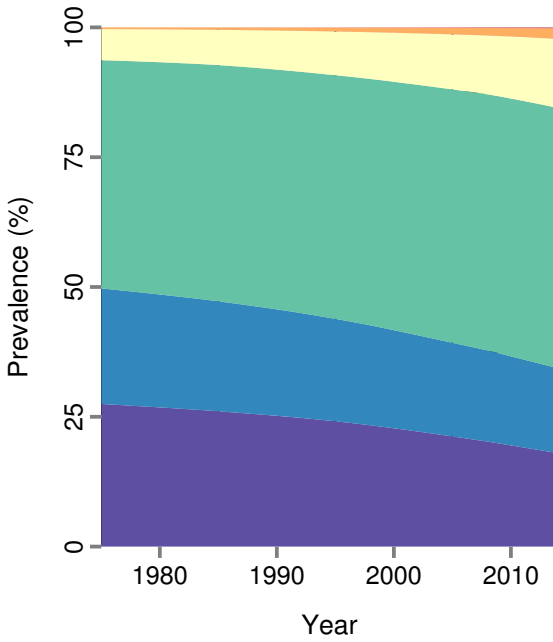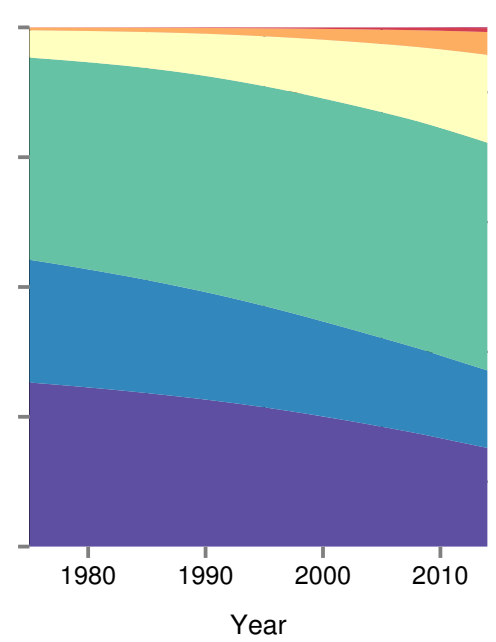

■ BMI <18.5 ■ BMI 18.5-20 ■ BMI 20-25 ■ BMI 25-30 ■ BMI 30-35 ■ BMI 35-40 ■ BMI ≥ 40

Netherlands  
North Western Europe

Men

Women

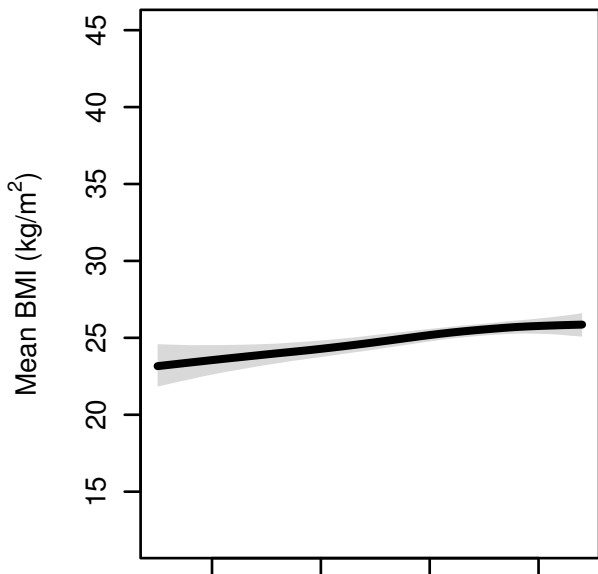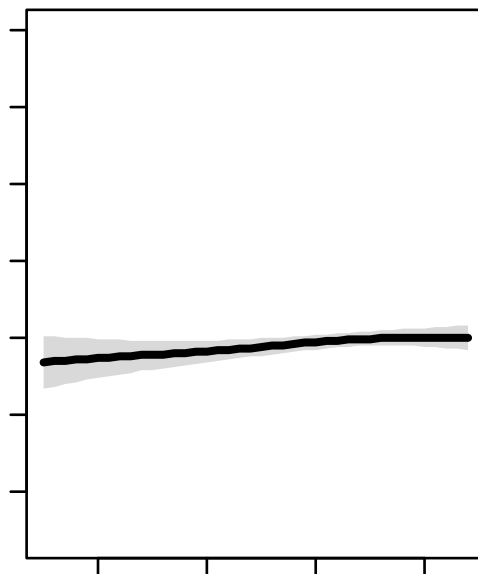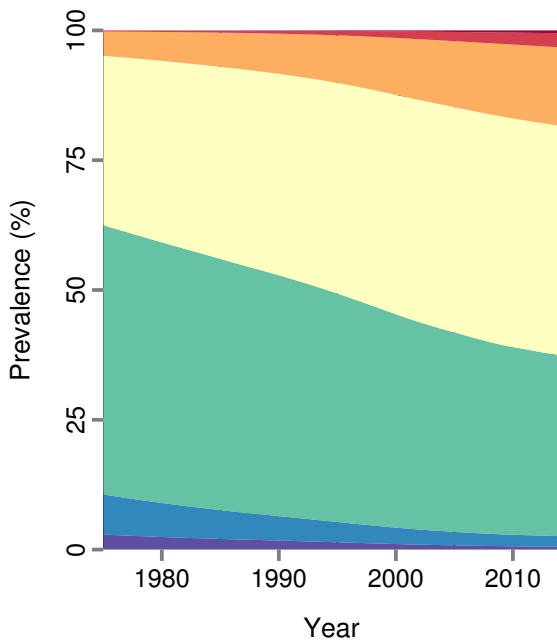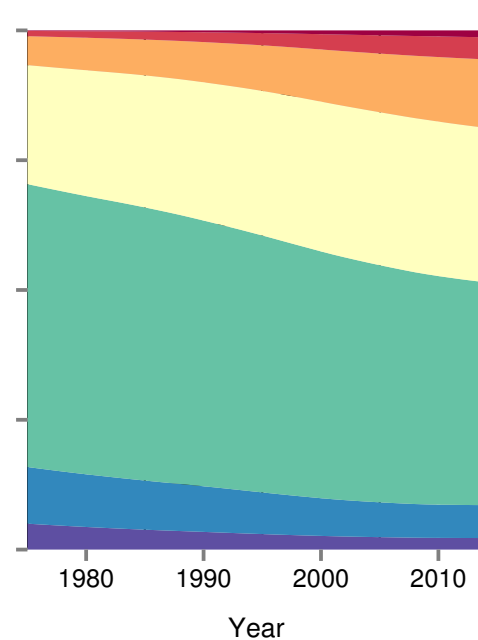

■ BMI <18.5 ■ BMI 18.5-20 ■ BMI 20-25 ■ BMI 25-30 ■ BMI 30-35 ■ BMI 35-40 ■ BMI ≥ 40

# New Zealand

High-income English-speaking countries

## Men

## Women

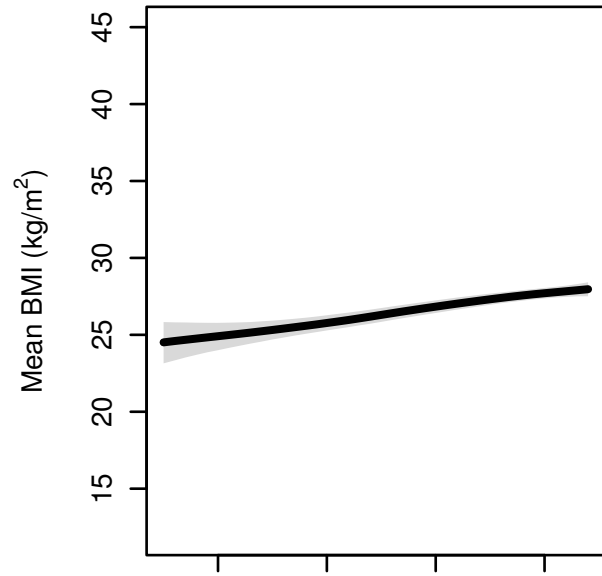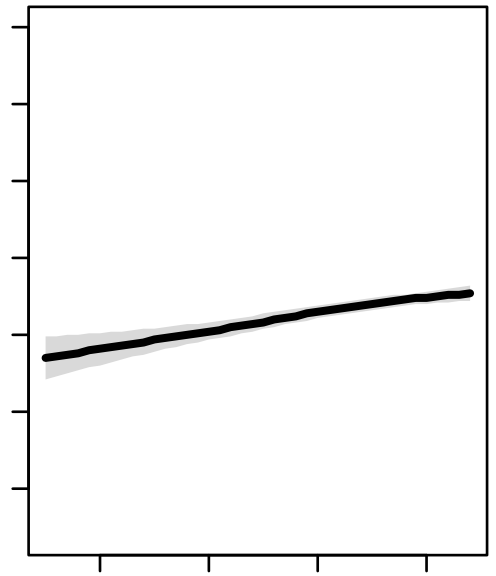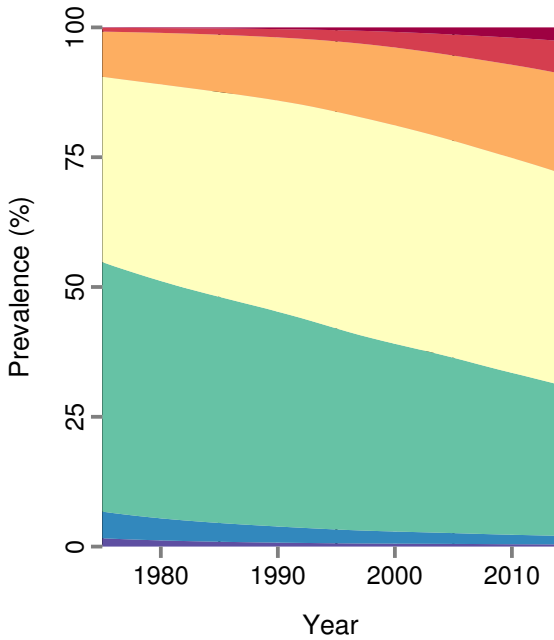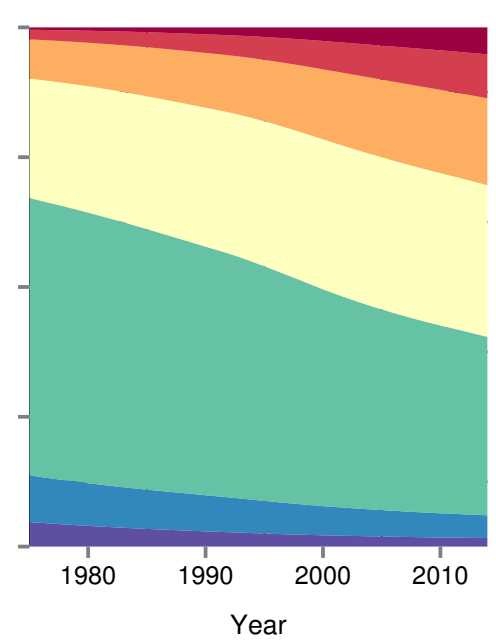

■ BMI <18.5 ■ BMI 18.5-20 ■ BMI 20-25 ■ BMI 25-30 ■ BMI 30-35 ■ BMI 35-40 ■ BMI ≥ 40

Nicaragua  
Central Latin America

Men

Women

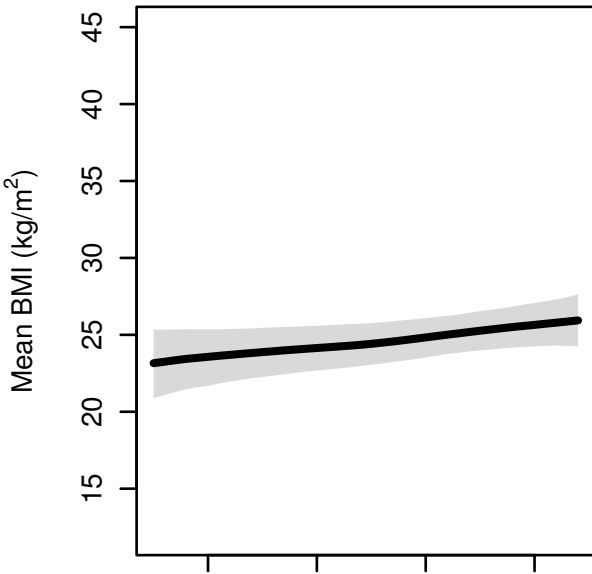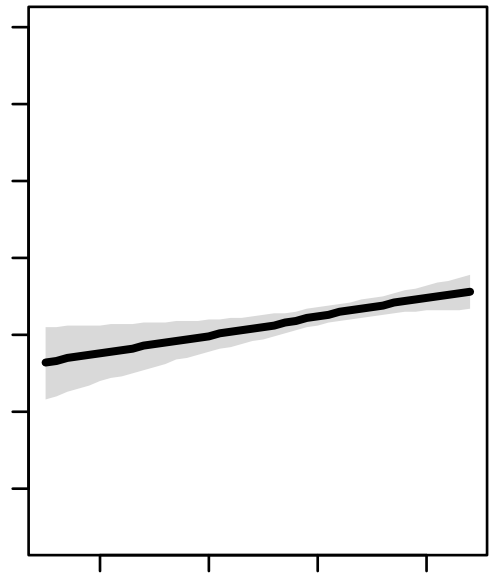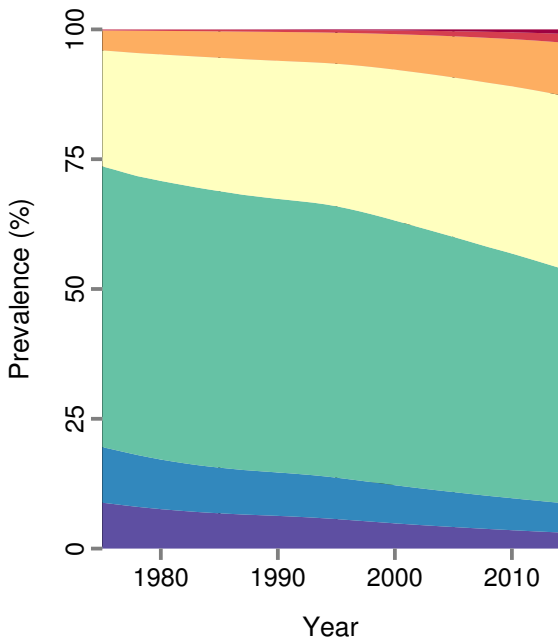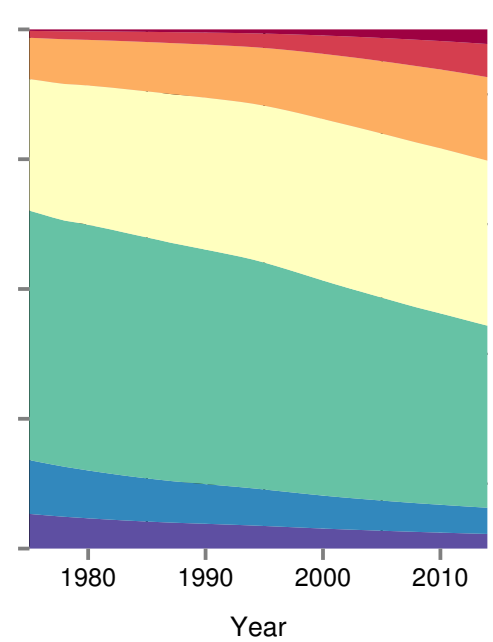

■ BMI <18.5 ■ BMI 18.5-20 ■ BMI 20-25 ■ BMI 25-30 ■ BMI 30-35 ■ BMI 35-40 ■ BMI ≥ 40

Niger  
West Africa

Men

Women

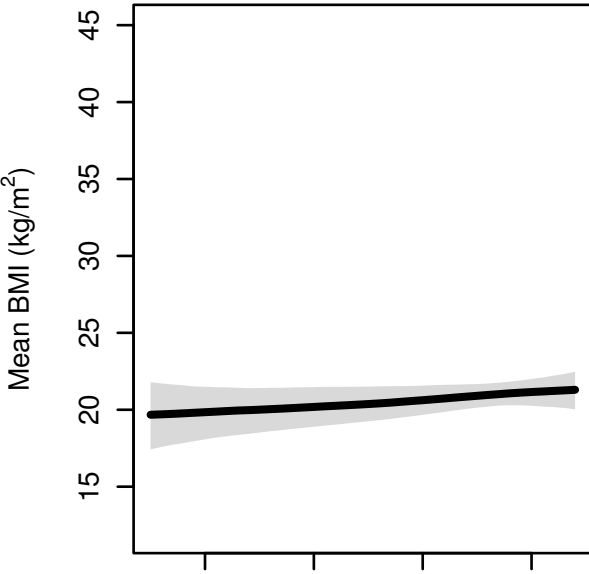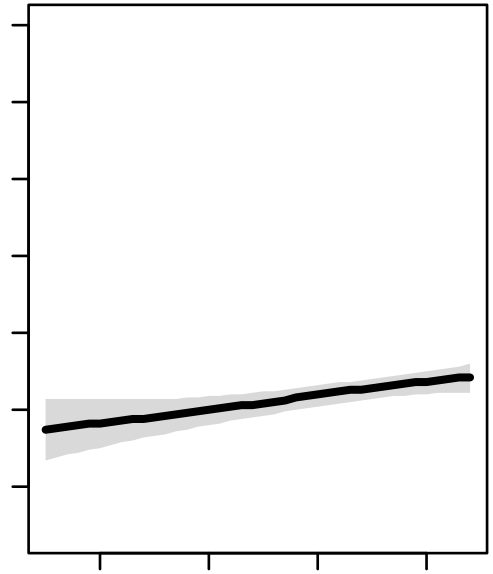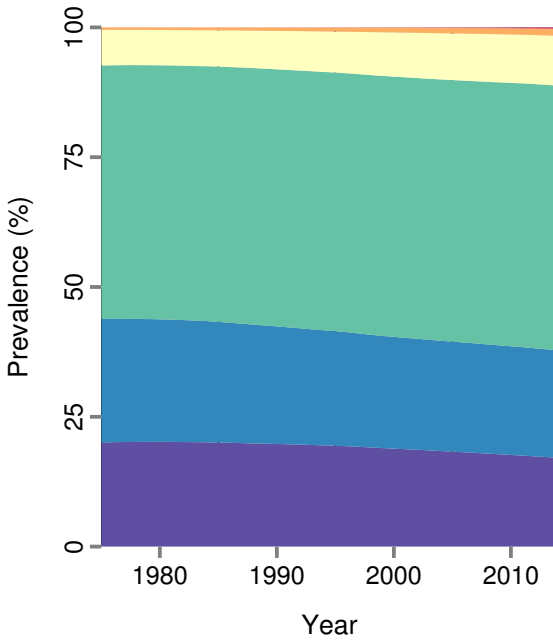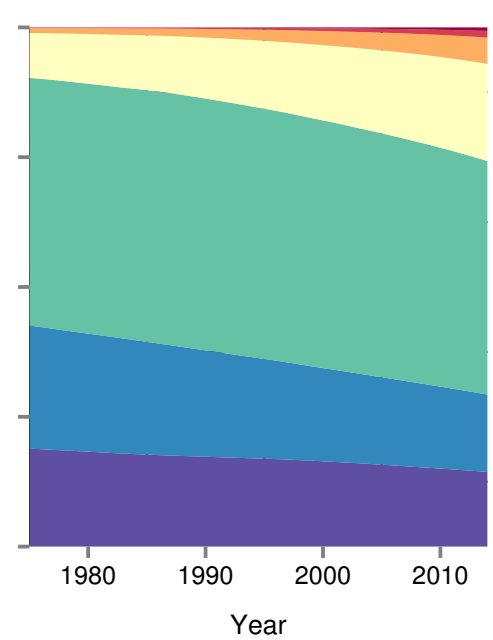

■ BMI <18.5 ■ BMI 18.5-20 ■ BMI 20-25 ■ BMI 25-30 ■ BMI 30-35 ■ BMI 35-40 ■ BMI ≥ 40

Nigeria  
West Africa

Men

Women

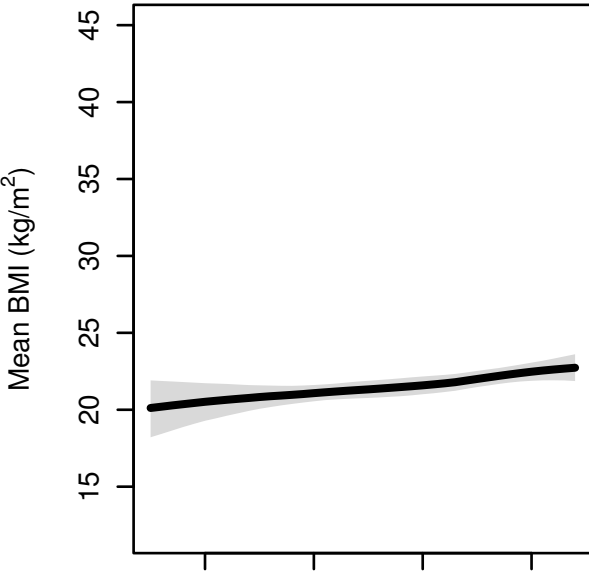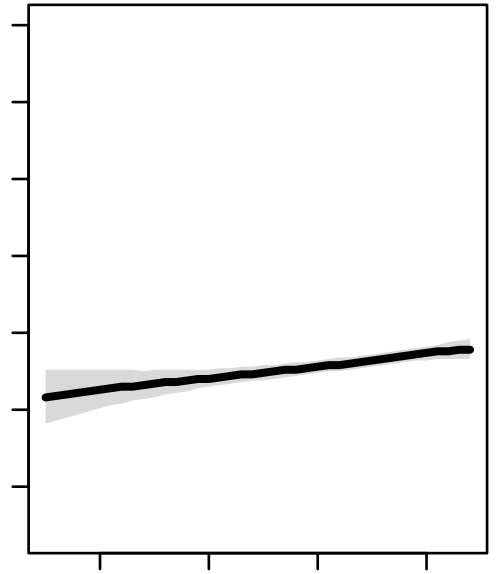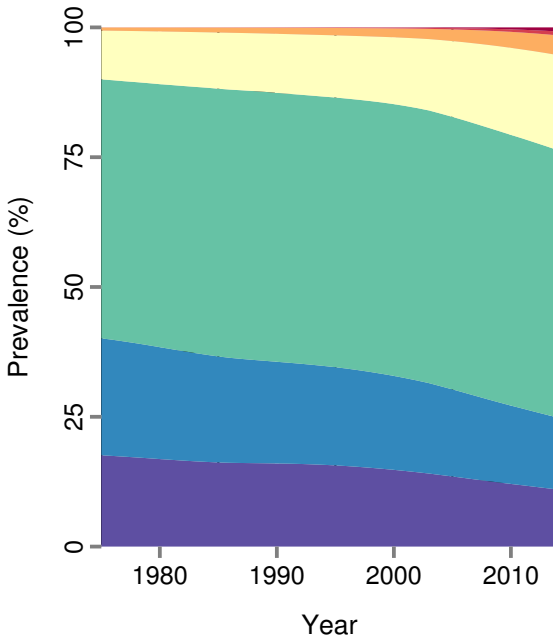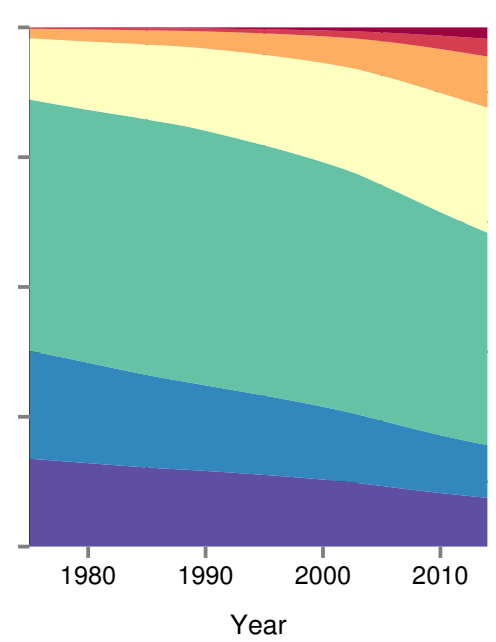

■ BMI <18.5 ■ BMI 18.5-20 ■ BMI 20-25 ■ BMI 25-30 ■ BMI 30-35 ■ BMI 35-40 ■ BMI ≥ 40

# Niue

Polynesia and Micronesia

## Men

## Women

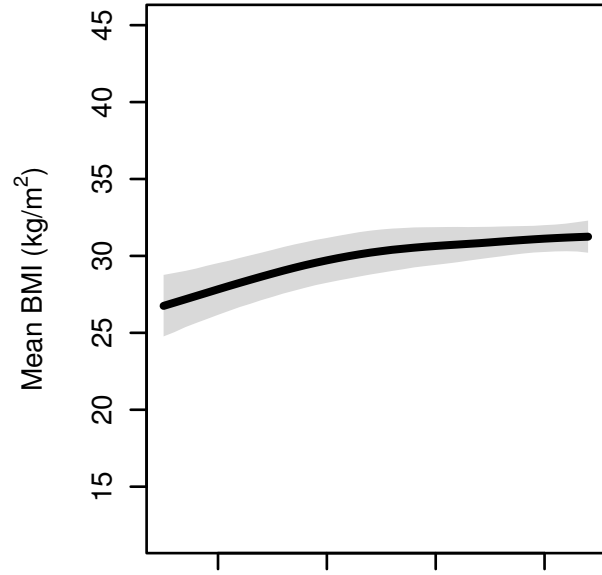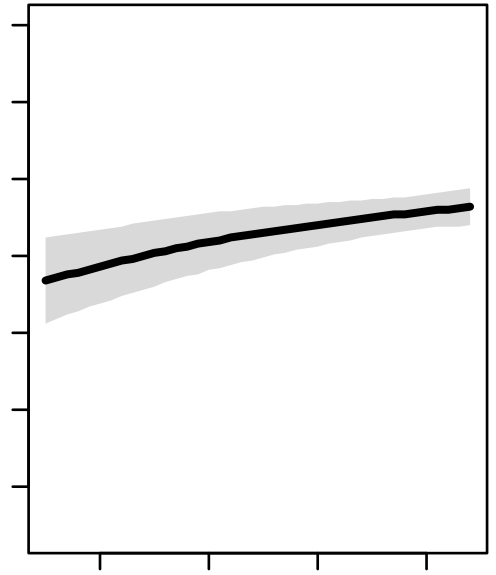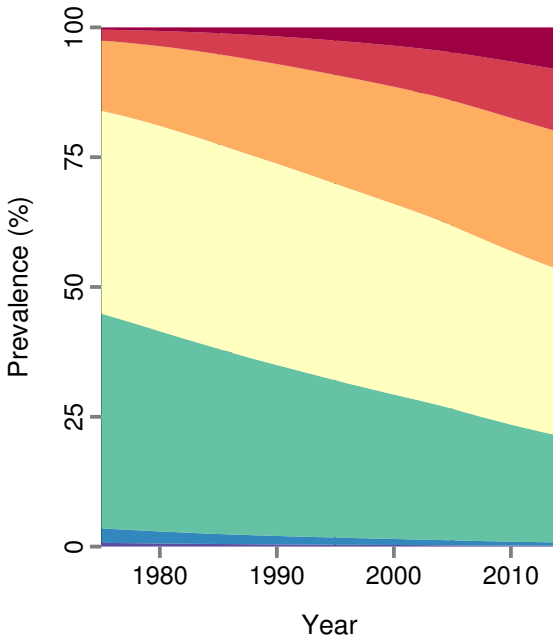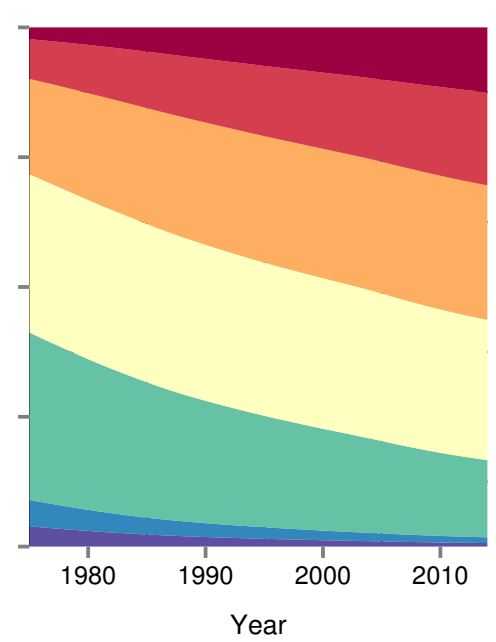

■ BMI <18.5 ■ BMI 18.5-20 ■ BMI 20-25 ■ BMI 25-30 ■ BMI 30-35 ■ BMI 35-40 ■ BMI ≥ 40



North Korea  
East Asia

Men

Women

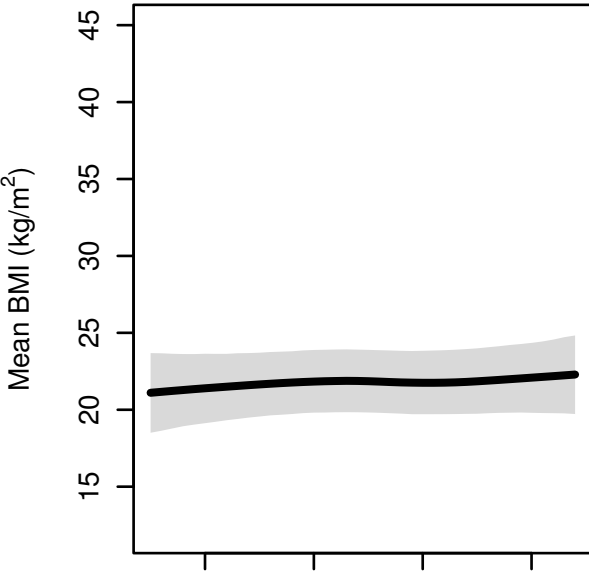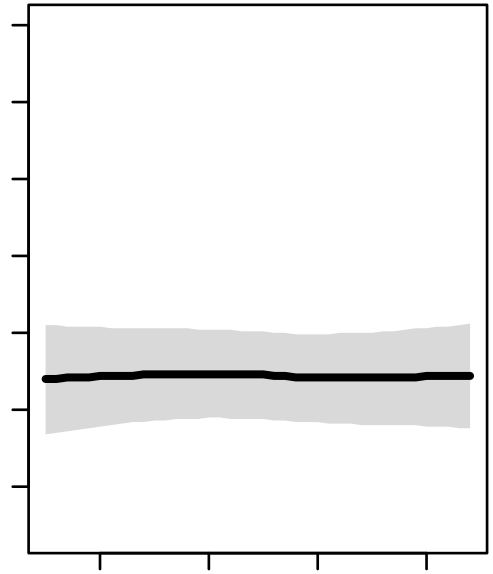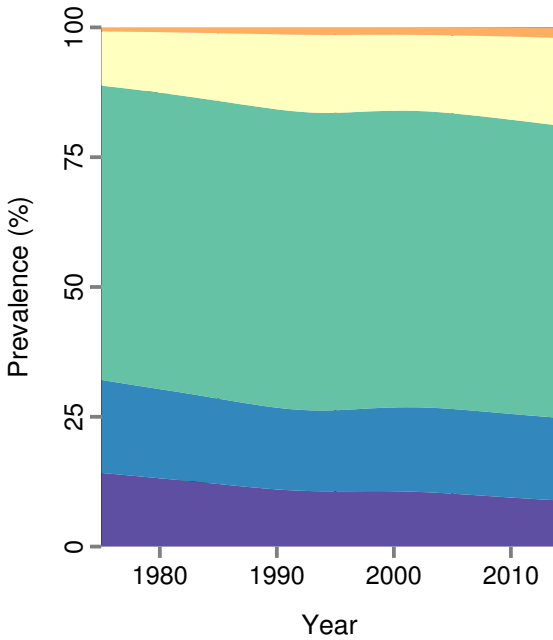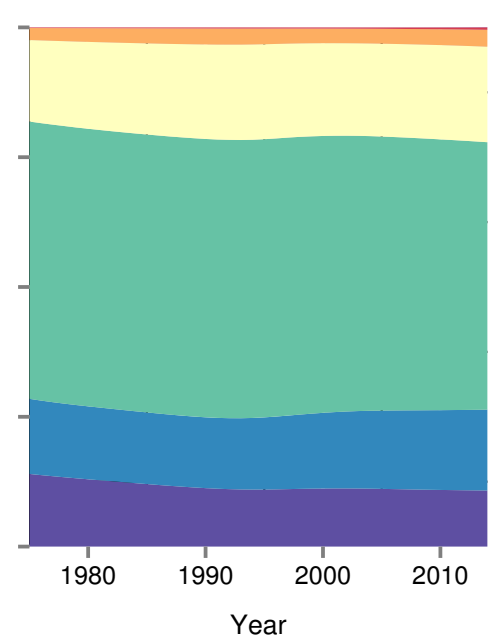

BMI <18.5 BMI 18.5-20 BMI 20-25 BMI 25-30 BMI 30-35 BMI 35-40 BMI ≥ 40

Norway  
North Western Europe

Men

Women

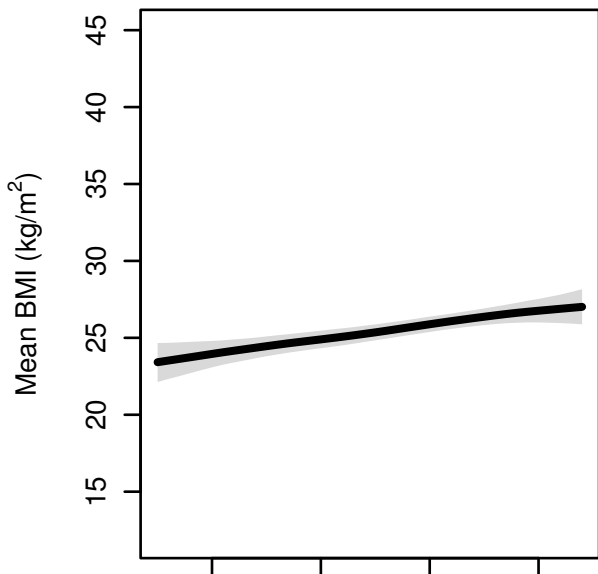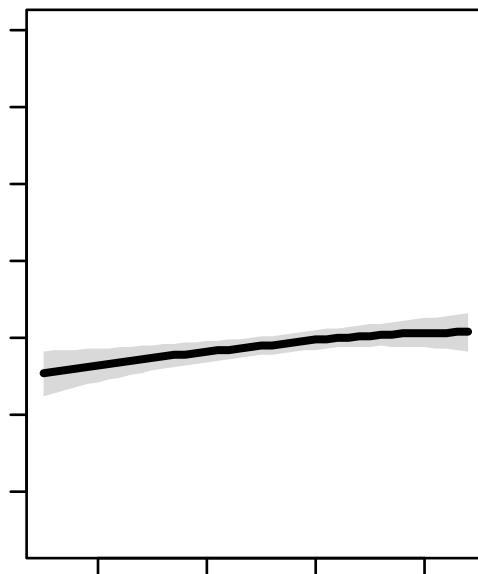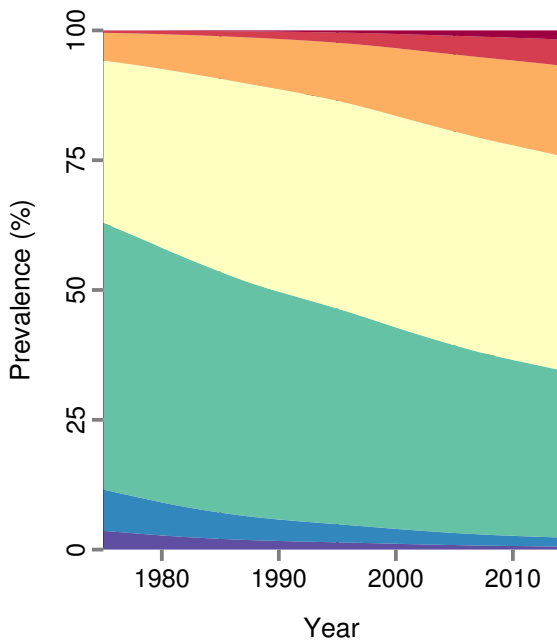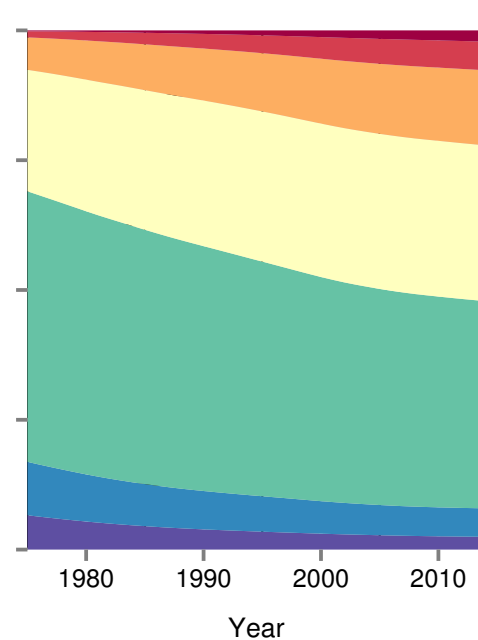

■ BMI <18.5 ■ BMI 18.5-20 ■ BMI 20-25 ■ BMI 25-30 ■ BMI 30-35 ■ BMI 35-40 ■ BMI ≥ 40

# Occupied Palestinian Territory

## Middle East and North Africa

### Men

### Women

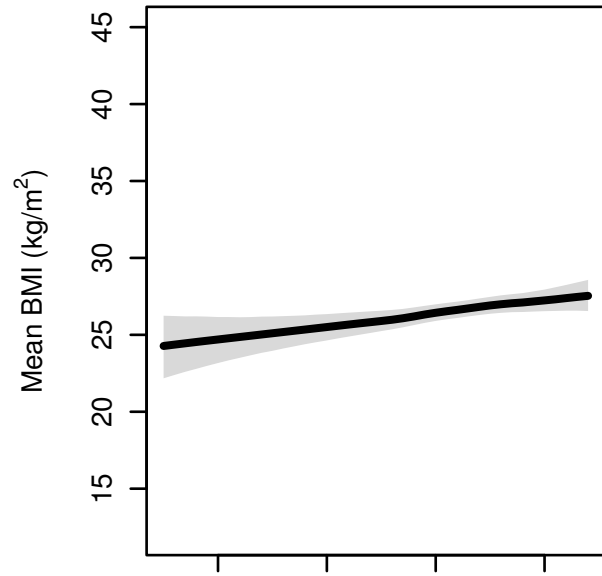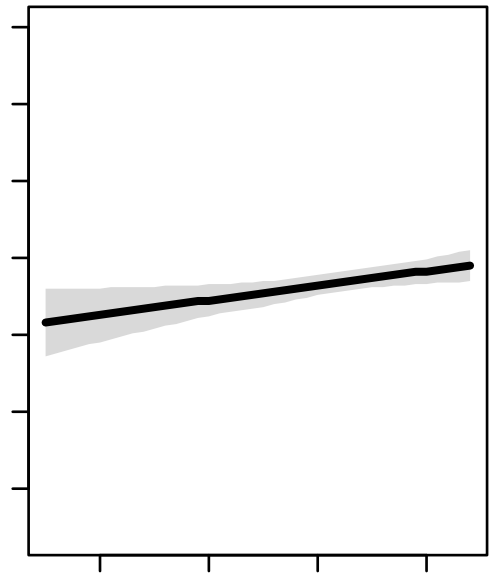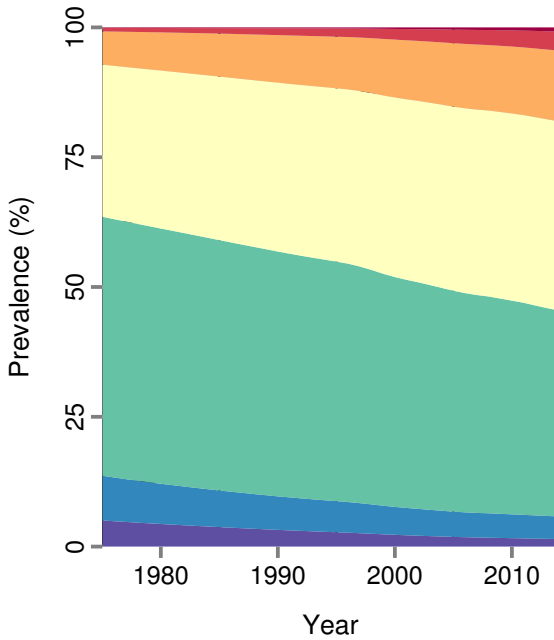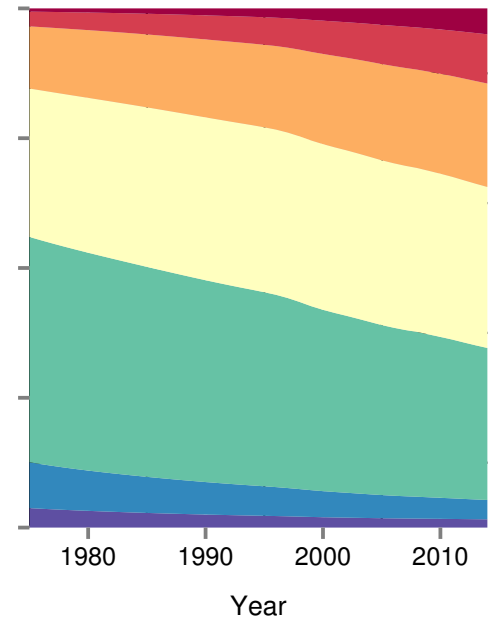

■ BMI <18.5 ■ BMI 18.5-20 ■ BMI 20-25 ■ BMI 25-30 ■ BMI 30-35 ■ BMI 35-40 ■ BMI ≥ 40

Oman  
Middle East and North Africa

Men

Women

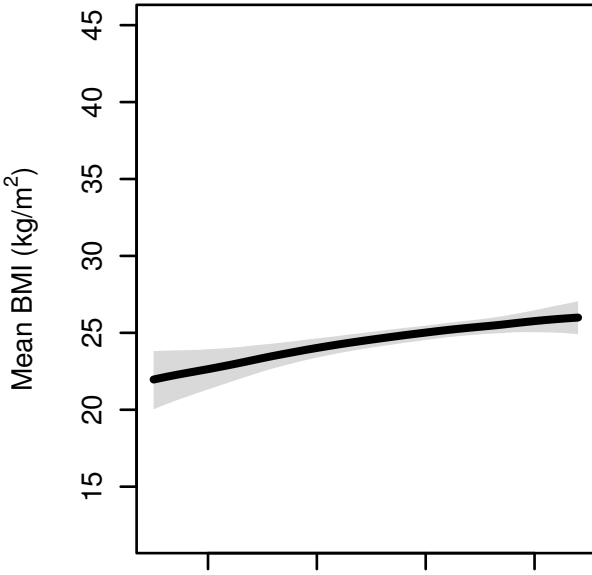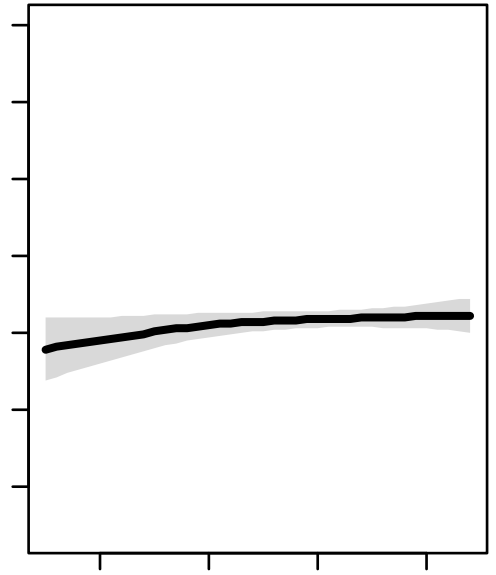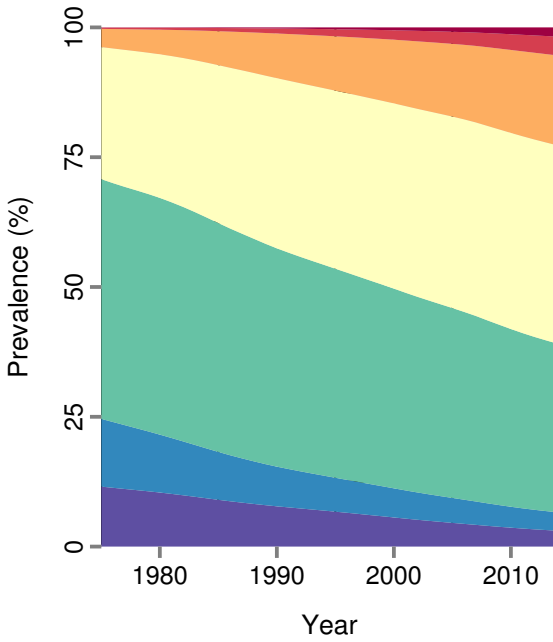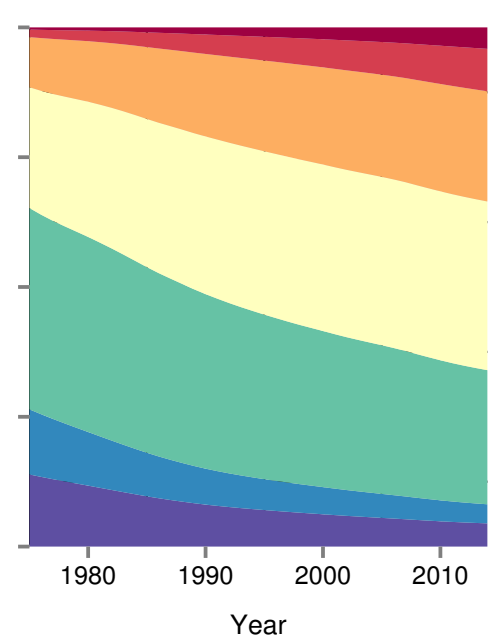

■ BMI <18.5 ■ BMI 18.5-20 ■ BMI 20-25 ■ BMI 25-30 ■ BMI 30-35 ■ BMI 35-40 ■ BMI ≥ 40

Pakistan  
South Asia

Men

Women

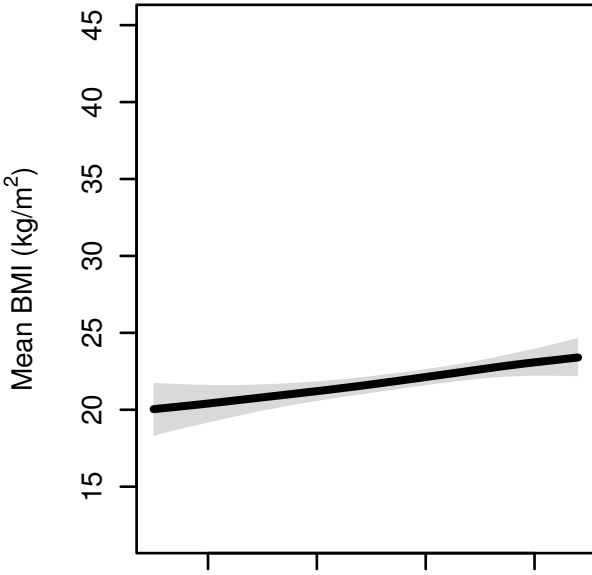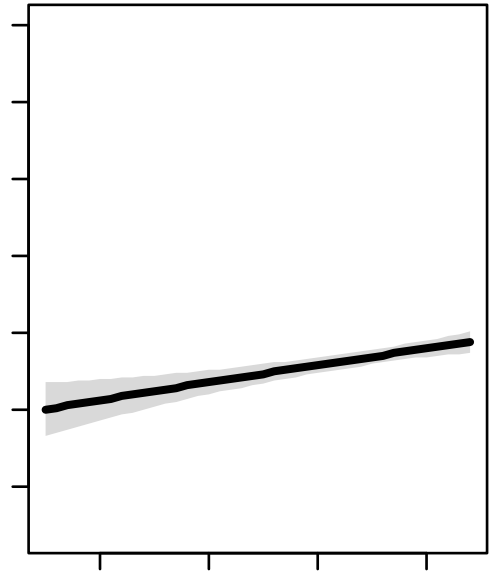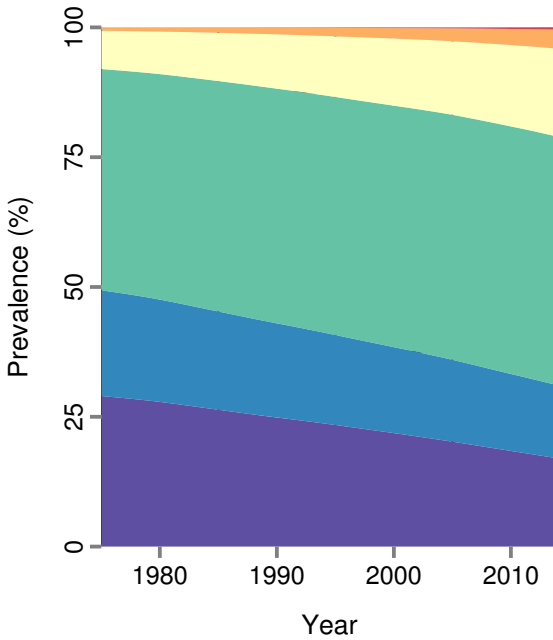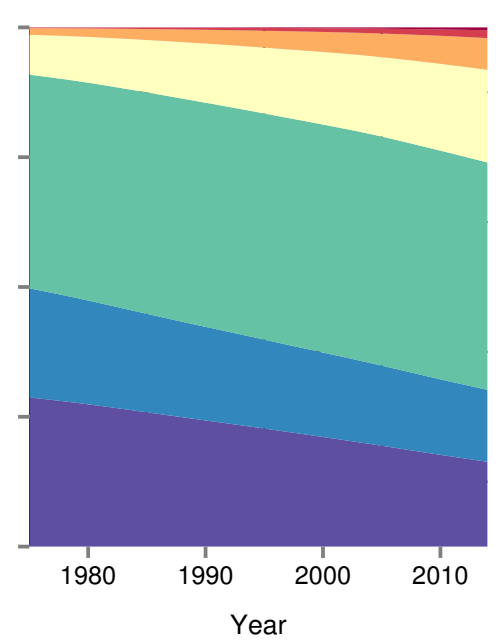

■ BMI <18.5 ■ BMI 18.5-20 ■ BMI 20-25 ■ BMI 25-30 ■ BMI 30-35 ■ BMI 35-40 ■ BMI ≥ 40

Palau  
Polynesia and Micronesia

Men

Women

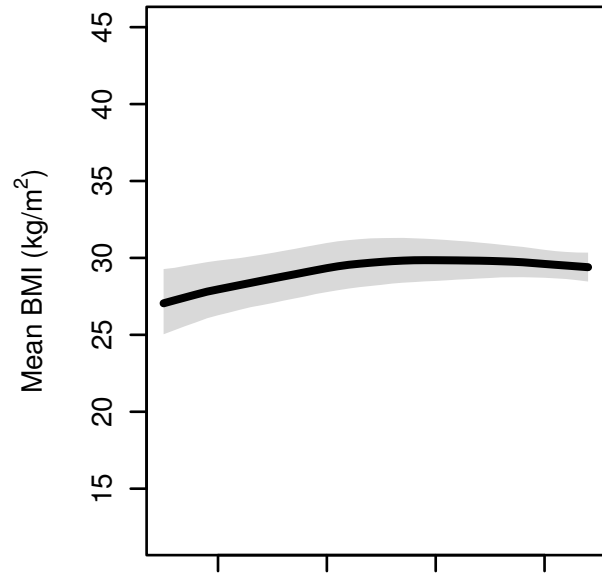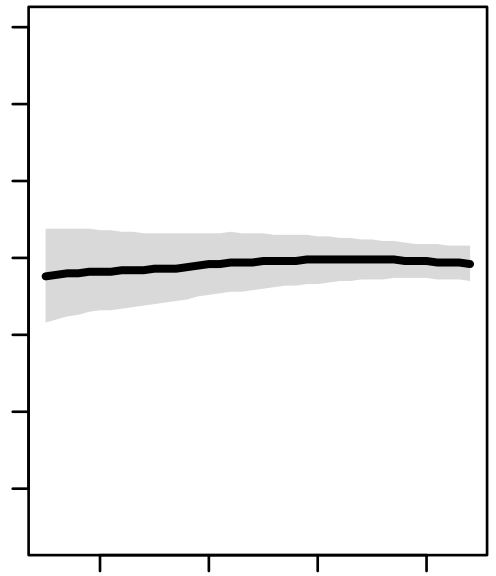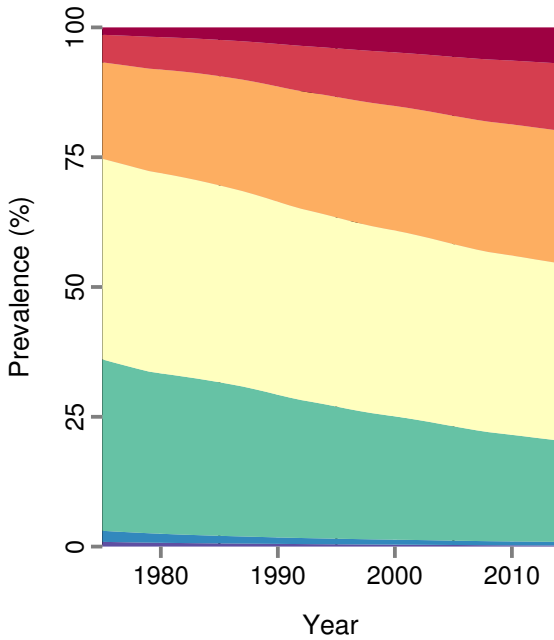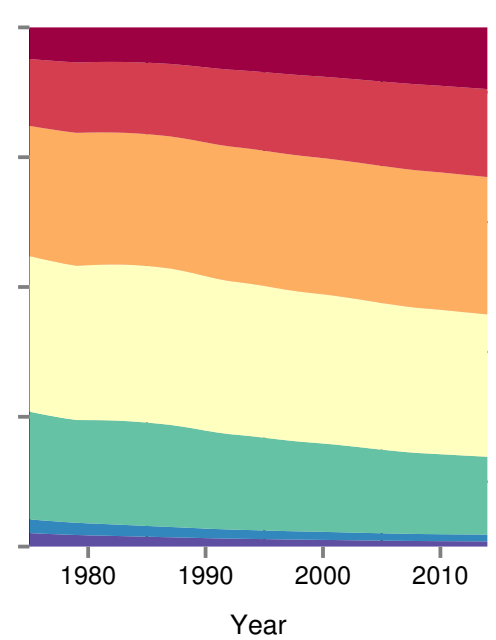

■ BMI <18.5 ■ BMI 18.5-20 ■ BMI 20-25 ■ BMI 25-30 ■ BMI 30-35 ■ BMI 35-40 ■ BMI ≥ 40

Panama  
Central Latin America

Men

Women

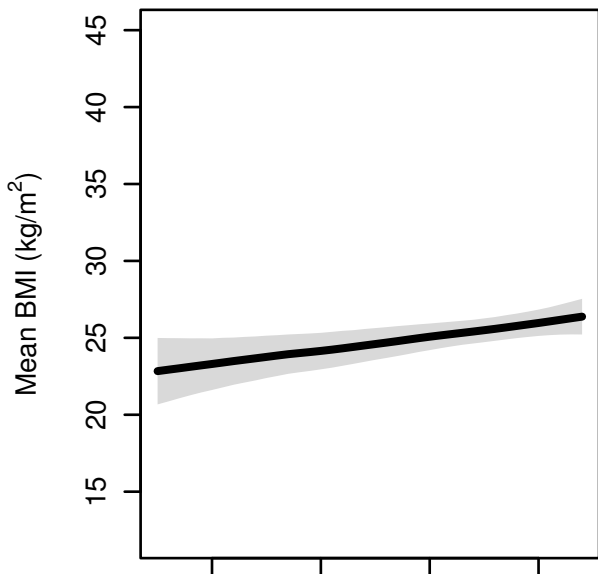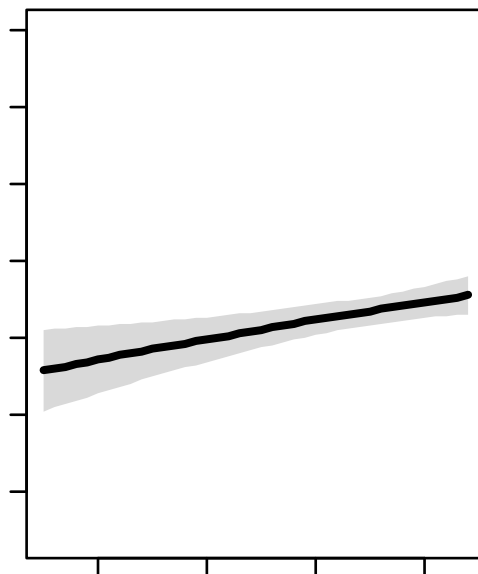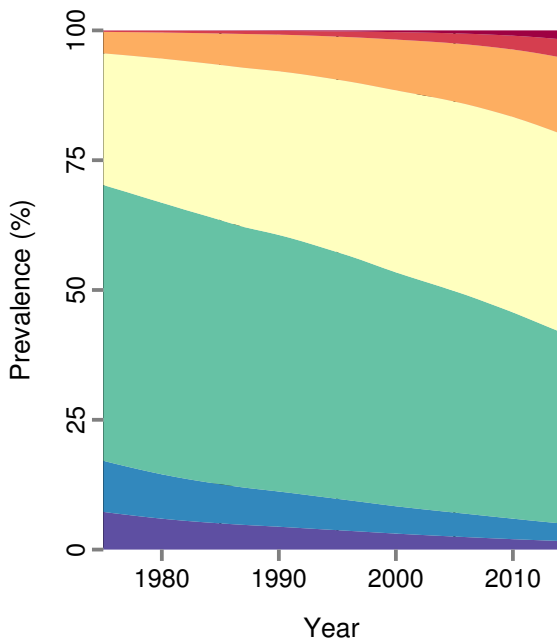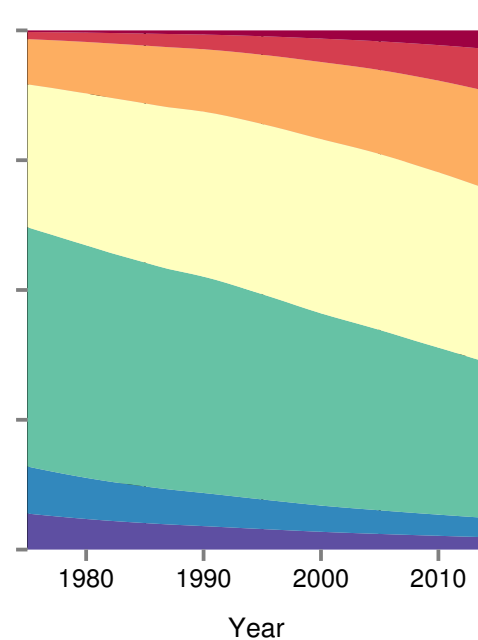

BMI <18.5
  BMI 18.5-20
  BMI 20-25
  BMI 25-30
  BMI 30-35
  BMI 35-40
  BMI ≥ 40

# Papua New Guinea Melanesia

## Men

## Women

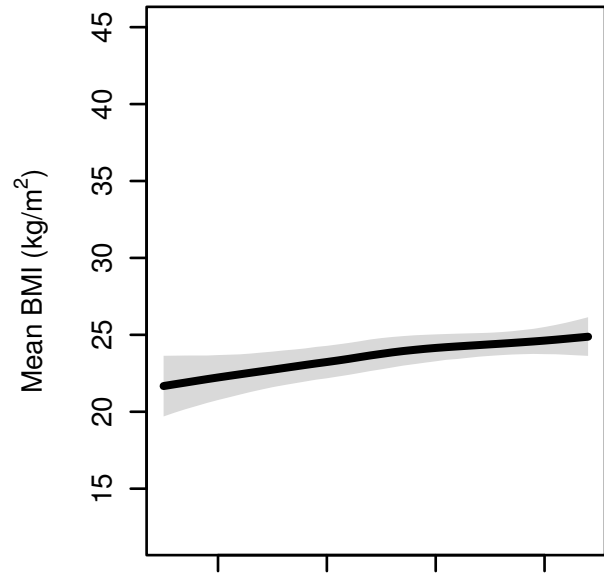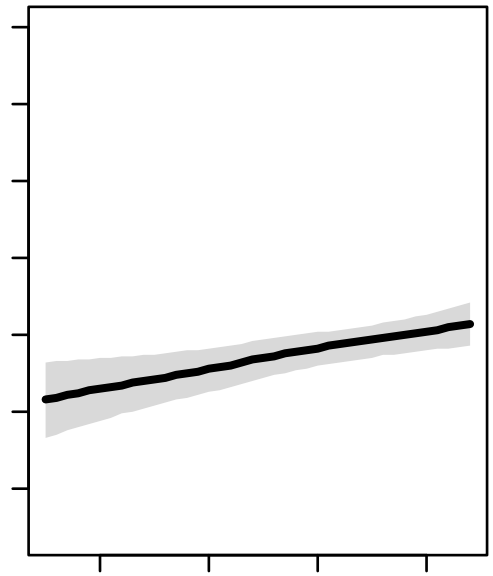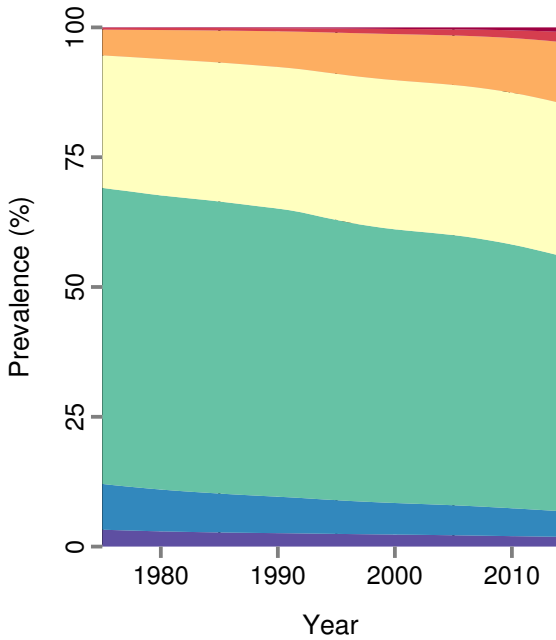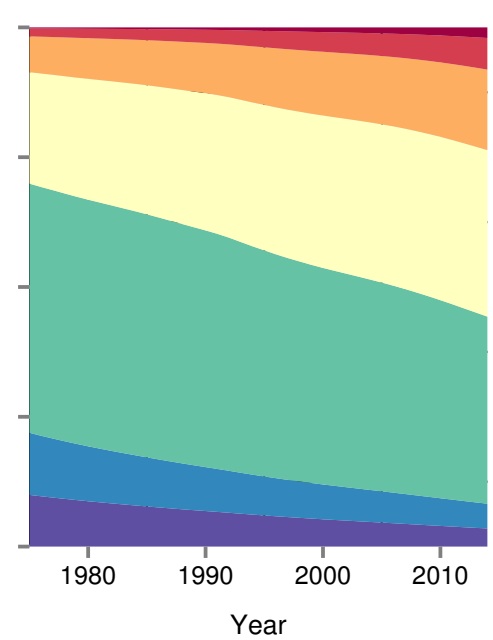

■ BMI <18.5 ■ BMI 18.5-20 ■ BMI 20-25 ■ BMI 25-30 ■ BMI 30-35 ■ BMI 35-40 ■ BMI ≥ 40



Paraguay  
Southern Latin America

Men

Women

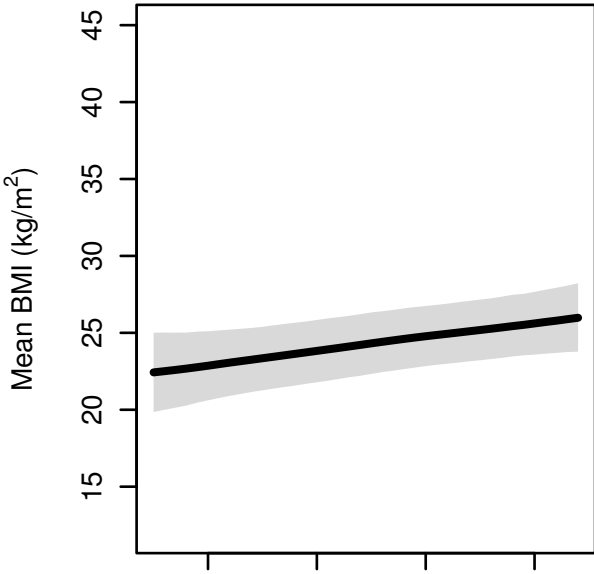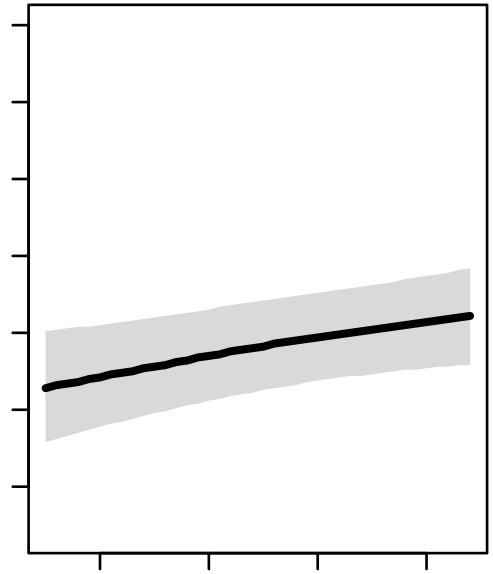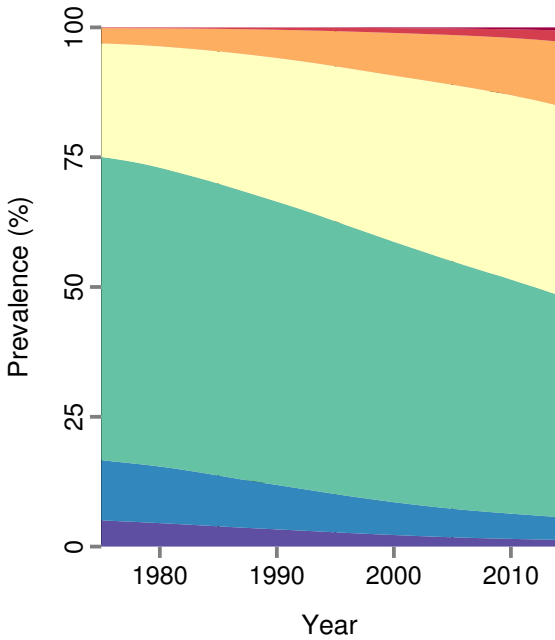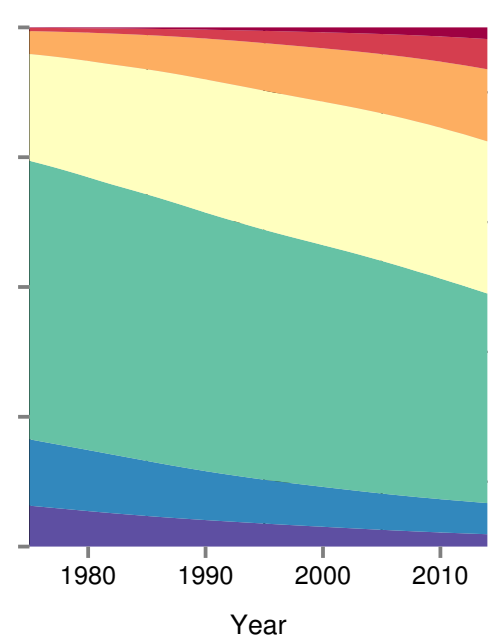

■ BMI <18.5 ■ BMI 18.5-20 ■ BMI 20-25 ■ BMI 25-30 ■ BMI 30-35 ■ BMI 35-40 ■ BMI ≥ 40

Peru  
Andean Latin America

Men

Women

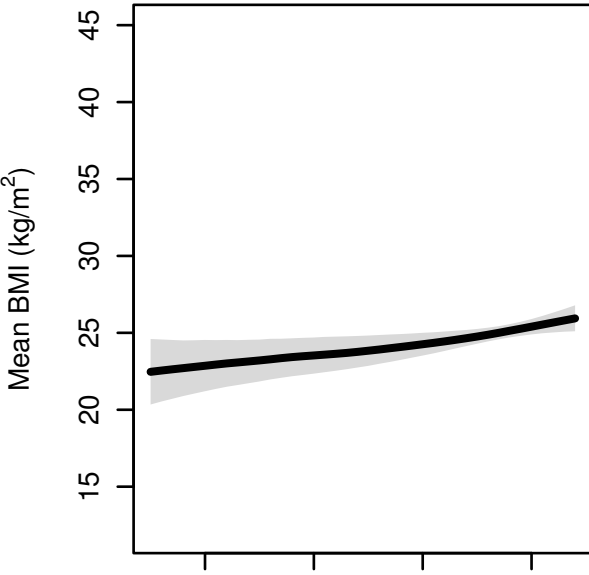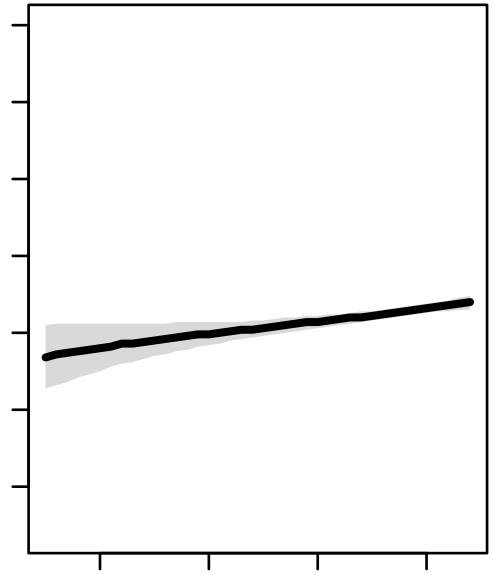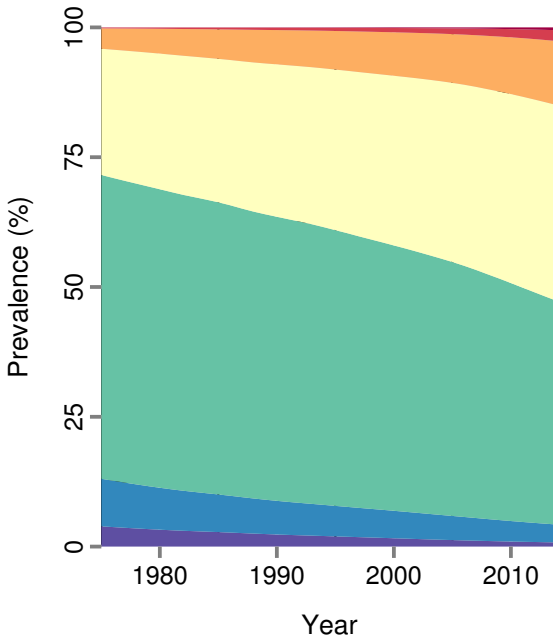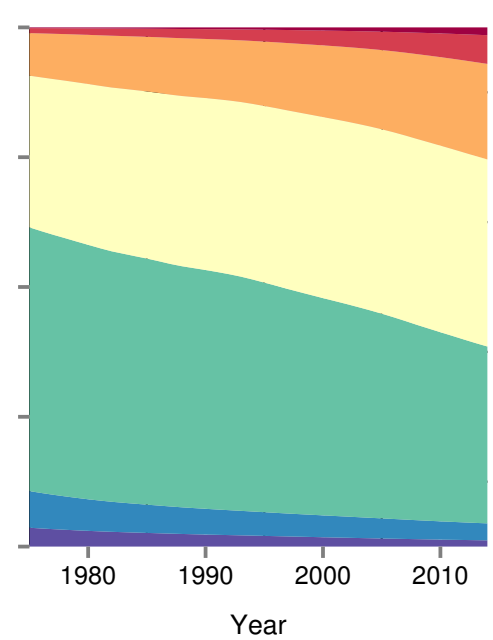

■ BMI <18.5 ■ BMI 18.5-20 ■ BMI 20-25 ■ BMI 25-30 ■ BMI 30-35 ■ BMI 35-40 ■ BMI ≥ 40

Philippines  
South East Asia

Men

Women

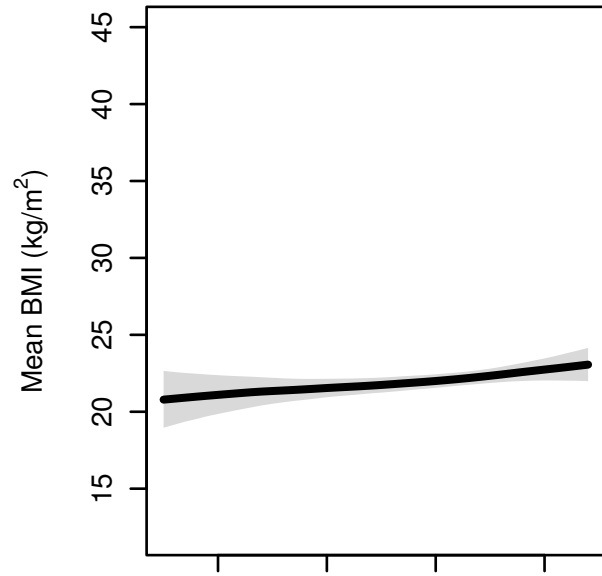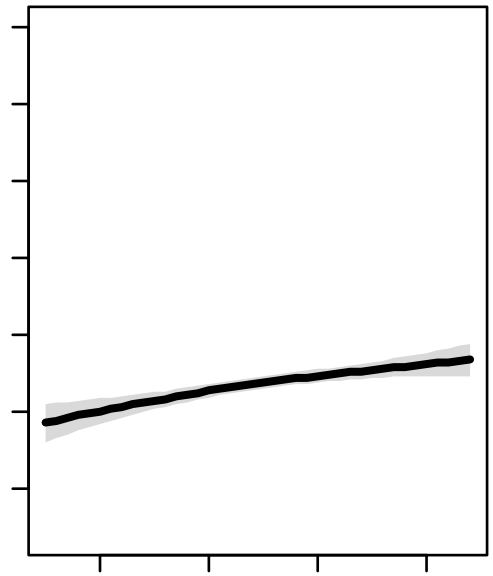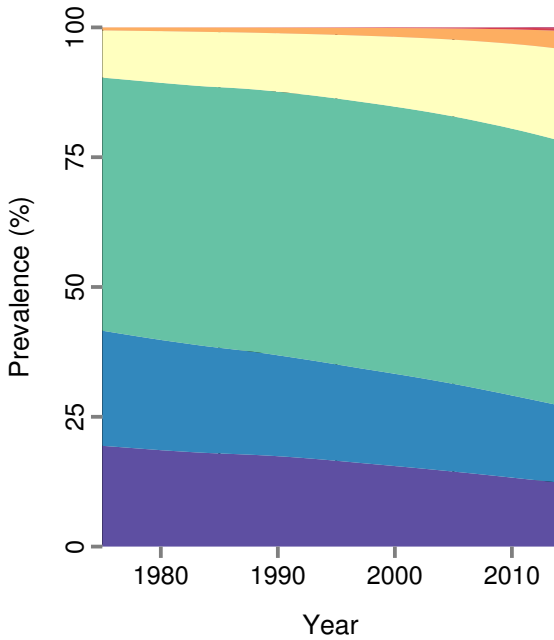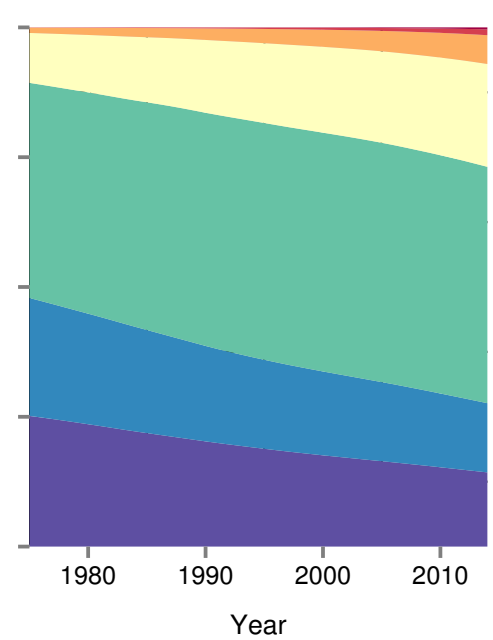

■ BMI <18.5 ■ BMI 18.5-20 ■ BMI 20-25 ■ BMI 25-30 ■ BMI 30-35 ■ BMI 35-40 ■ BMI ≥ 40

Poland  
Central Europe

Men

Women

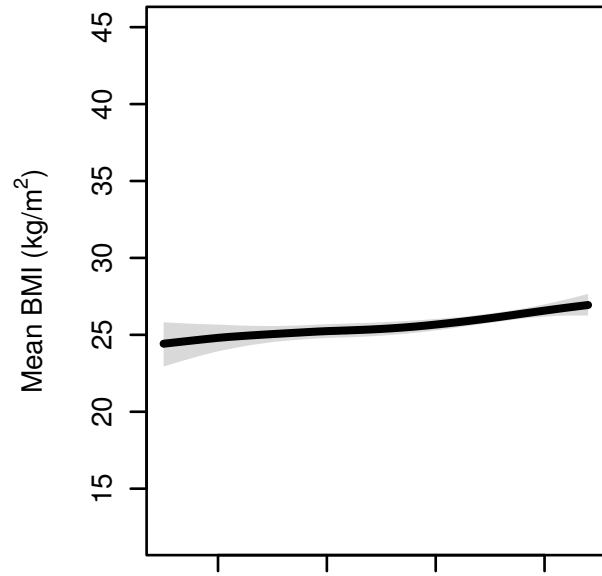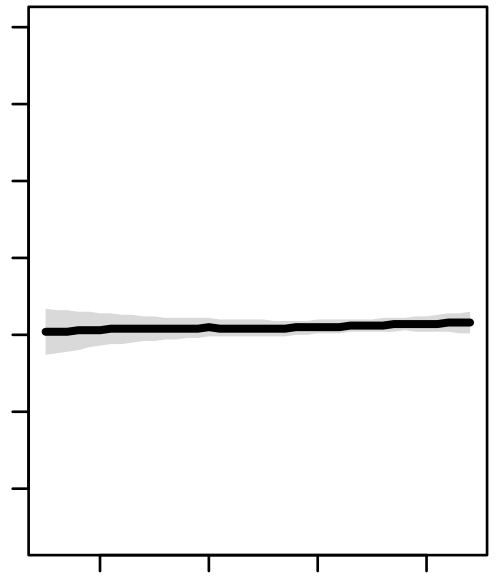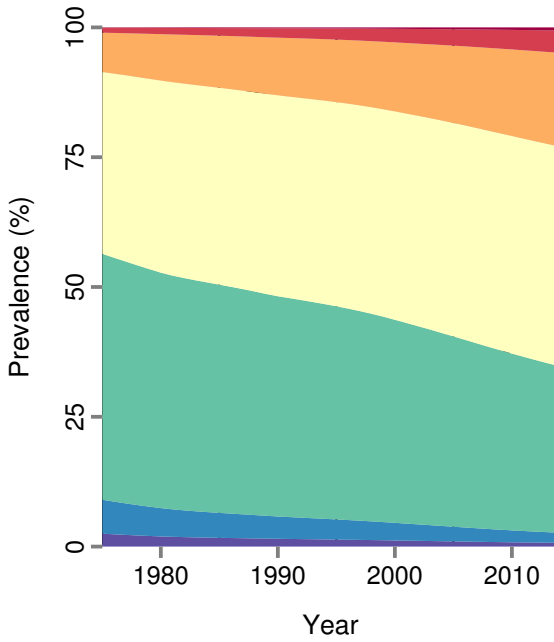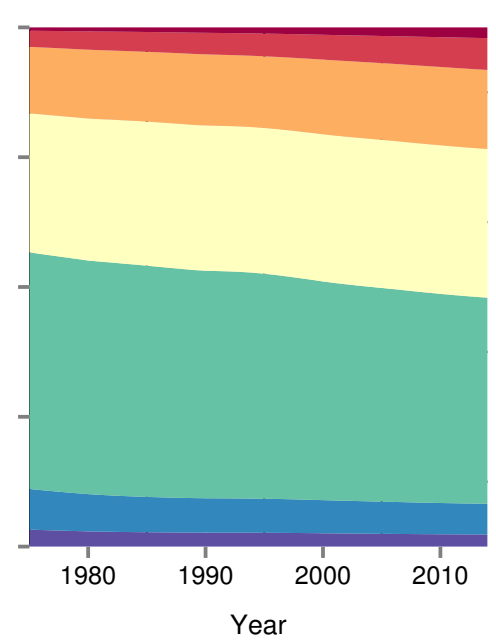

■ BMI <18.5 ■ BMI 18.5-20 ■ BMI 20-25 ■ BMI 25-30 ■ BMI 30-35 ■ BMI 35-40 ■ BMI ≥ 40

Portugal  
South Western Europe

Men

Women

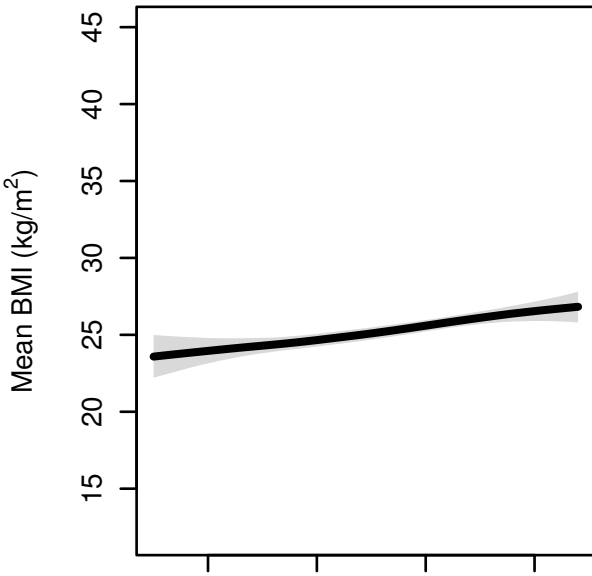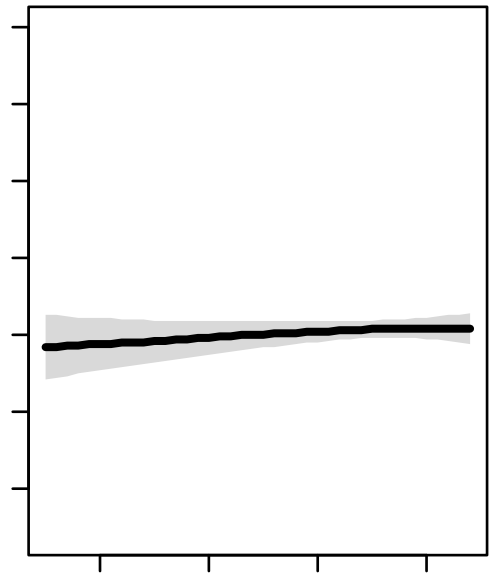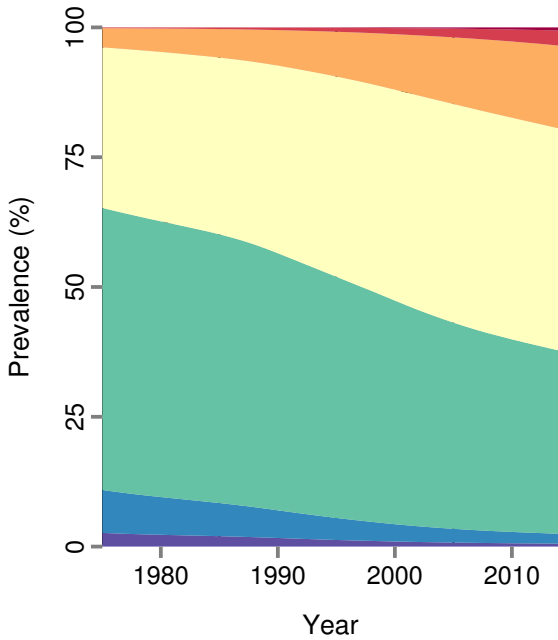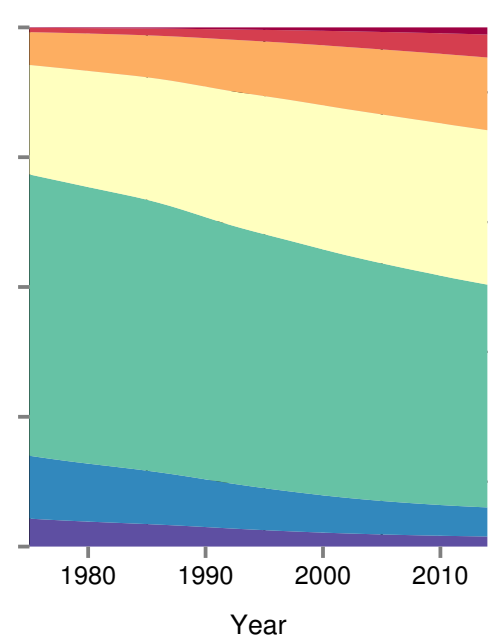

■ BMI <18.5 ■ BMI 18.5-20 ■ BMI 20-25 ■ BMI 25-30 ■ BMI 30-35 ■ BMI 35-40 ■ BMI ≥ 40

Puerto Rico  
Caribbean

Men

Women

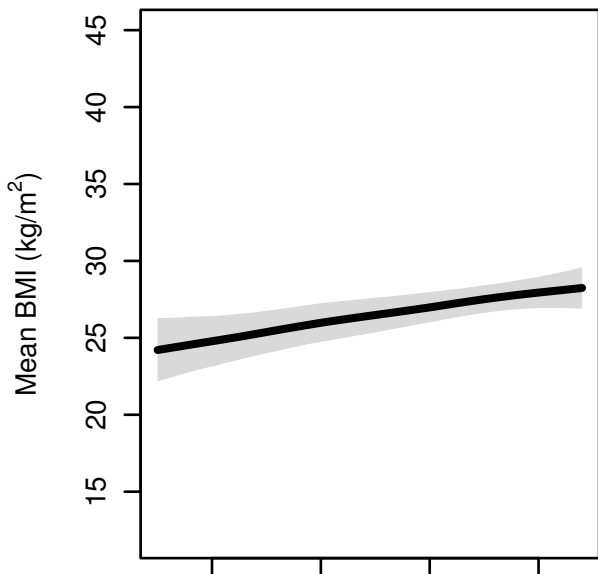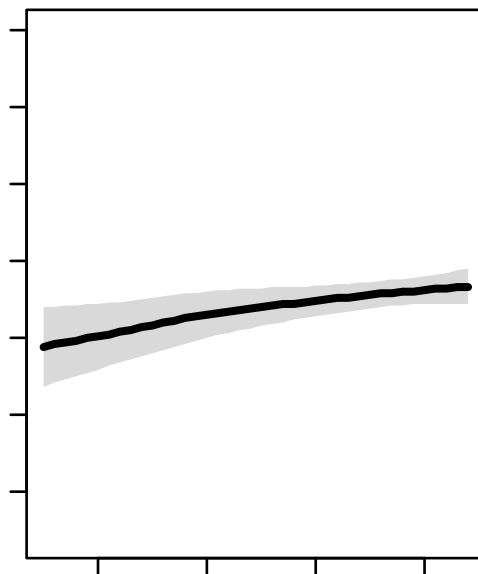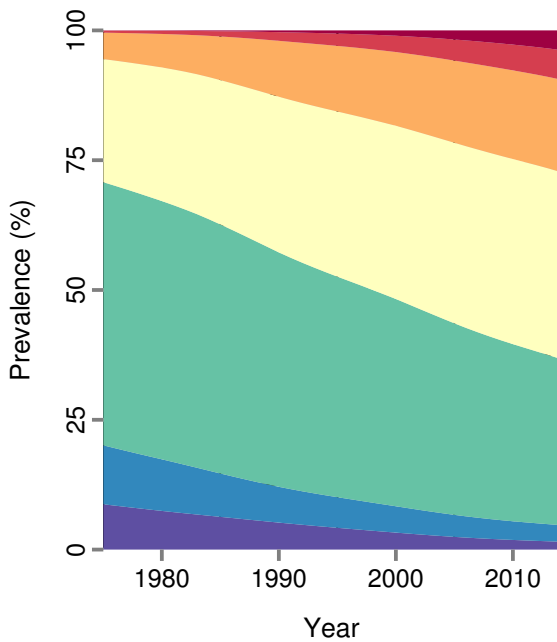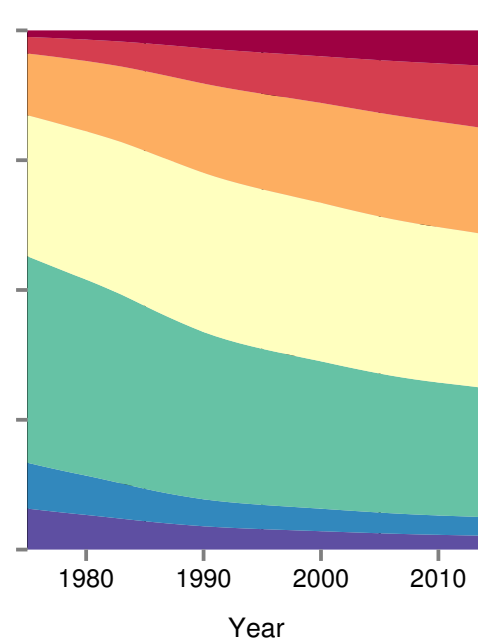

■ BMI <18.5 ■ BMI 18.5-20 ■ BMI 20-25 ■ BMI 25-30 ■ BMI 30-35 ■ BMI 35-40 ■ BMI ≥ 40

Qatar  
Middle East and North Africa

Men

Women

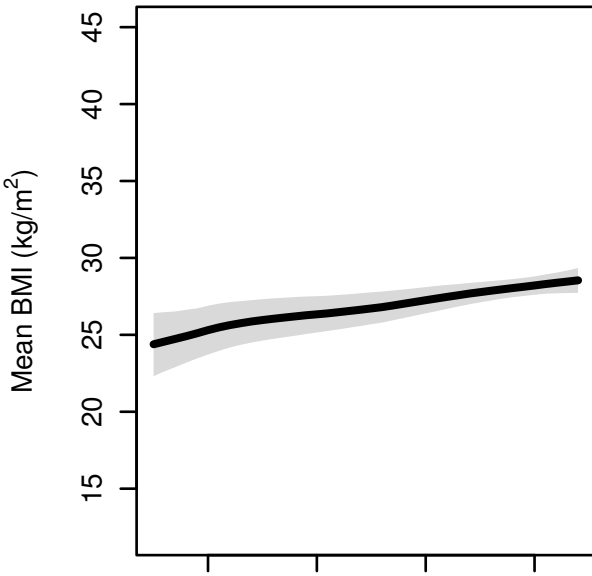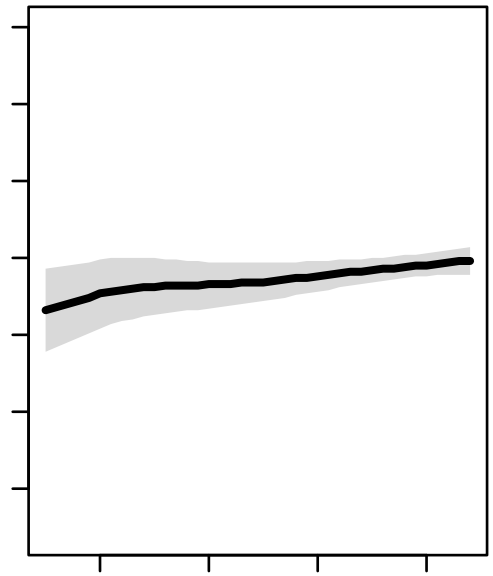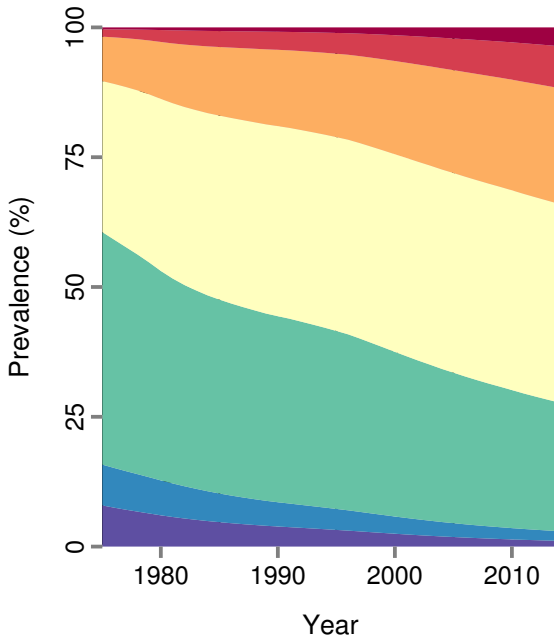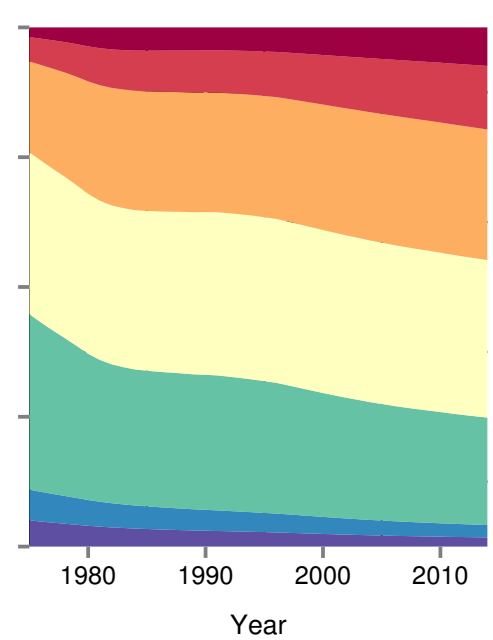

■ BMI <18.5 ■ BMI 18.5-20 ■ BMI 20-25 ■ BMI 25-30 ■ BMI 30-35 ■ BMI 35-40 ■ BMI ≥ 40

Romania  
Central Europe

Men

Women

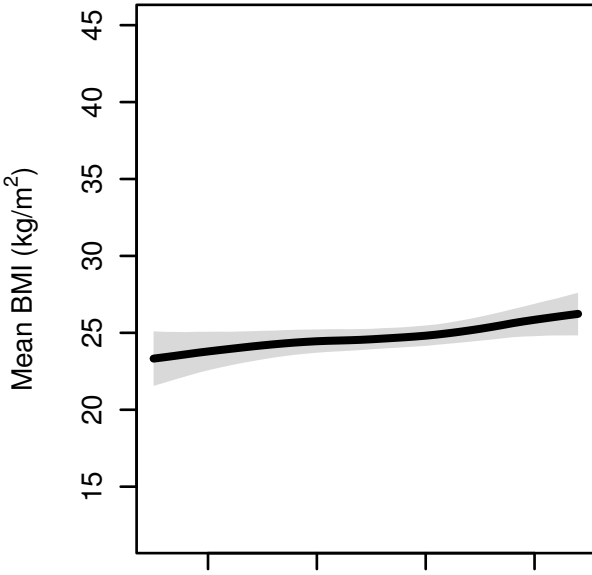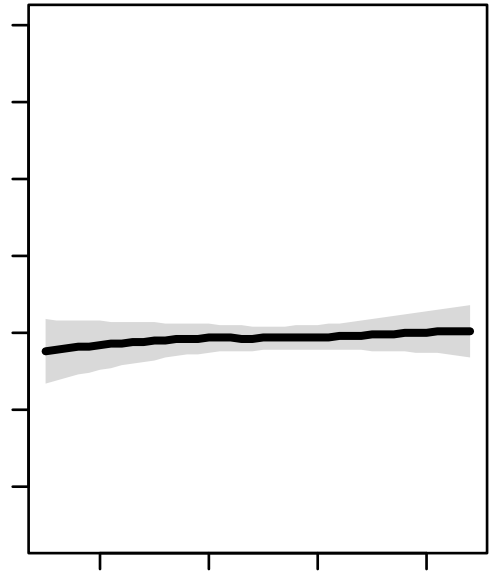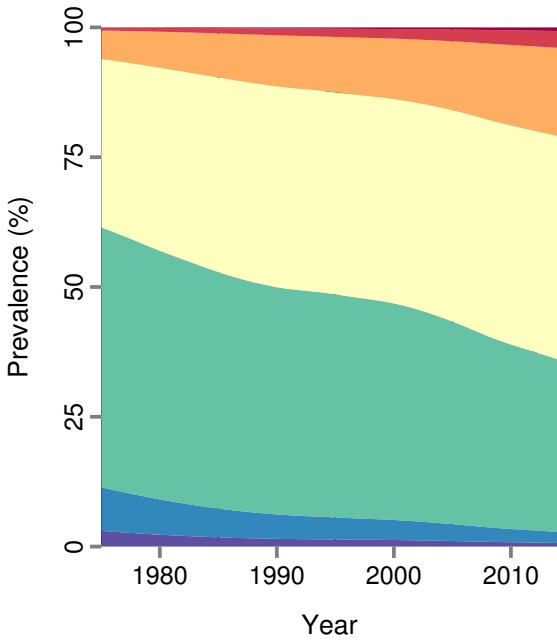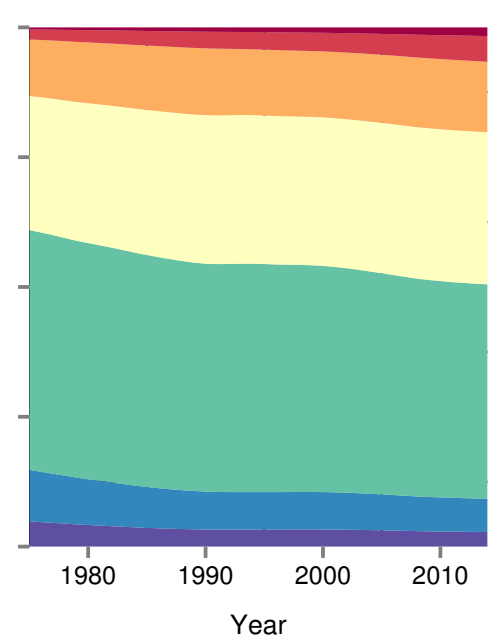

■ BMI <18.5 ■ BMI 18.5-20 ■ BMI 20-25 ■ BMI 25-30 ■ BMI 30-35 ■ BMI 35-40 ■ BMI ≥ 40



# Russian Federation Eastern Europe

## Men

## Women

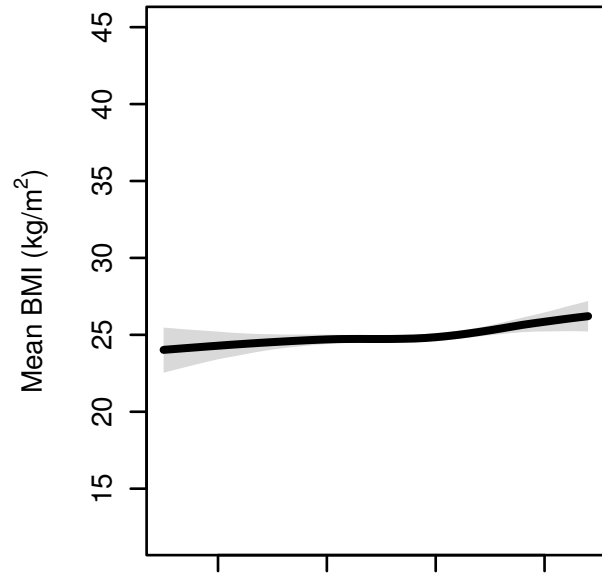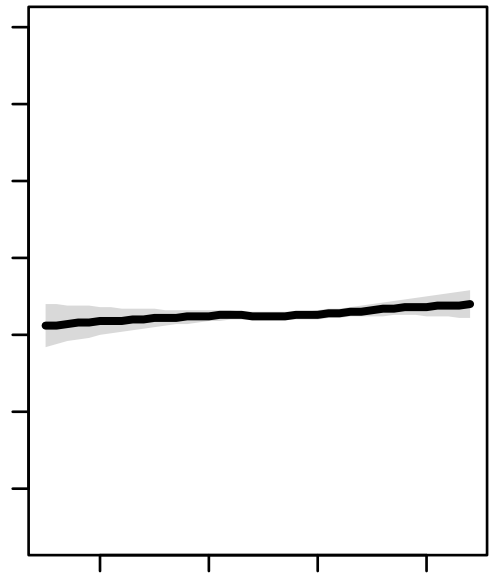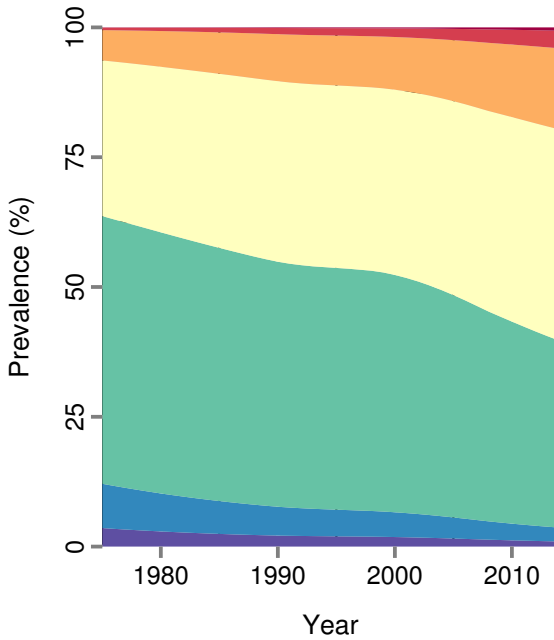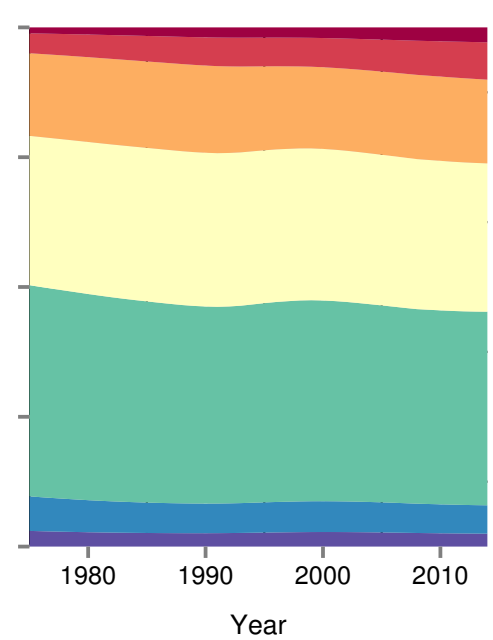

■ BMI <18.5 ■ BMI 18.5-20 ■ BMI 20-25 ■ BMI 25-30 ■ BMI 30-35 ■ BMI 35-40 ■ BMI ≥ 40

Rwanda  
East Africa

Men

Women

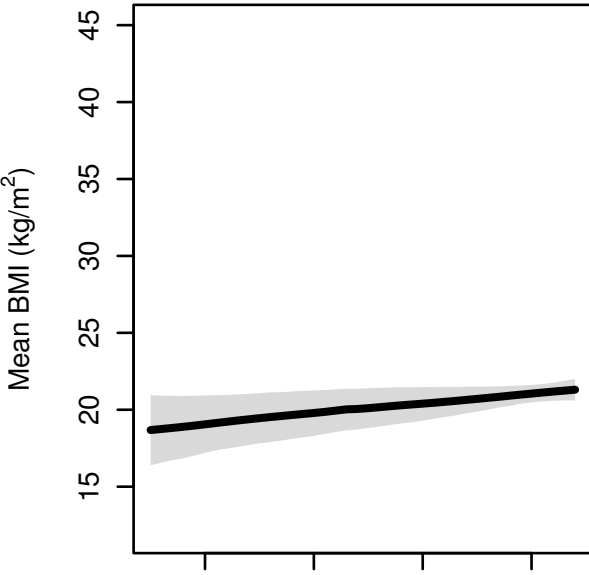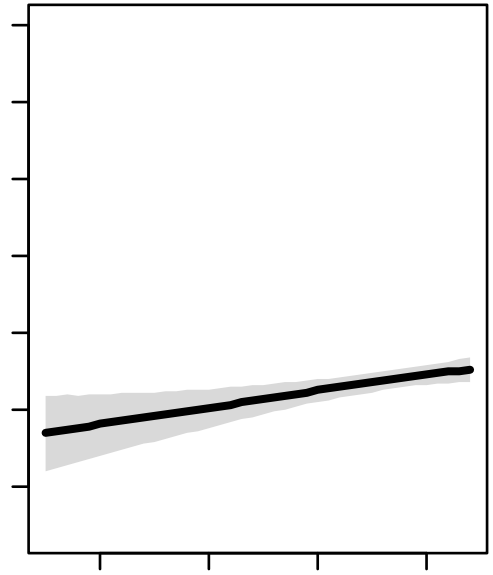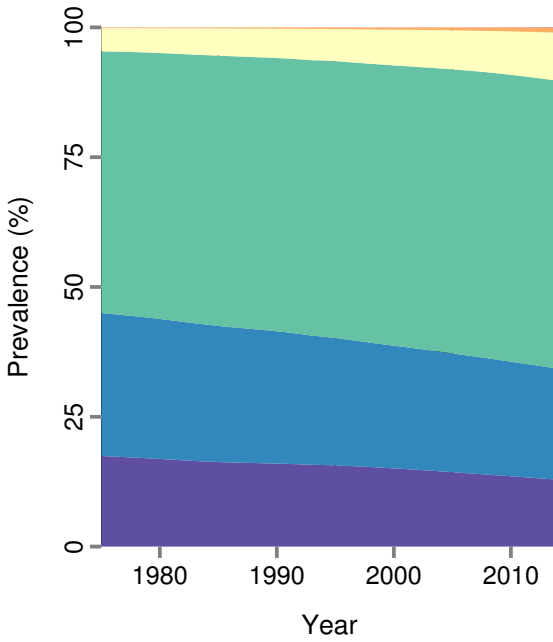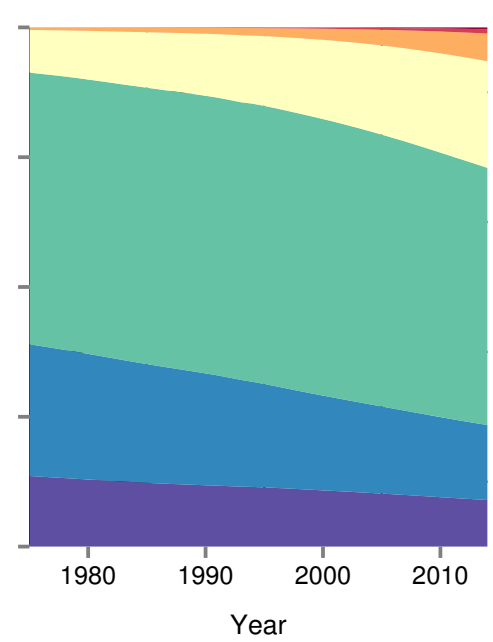

■ BMI <18.5 ■ BMI 18.5-20 ■ BMI 20-25 ■ BMI 25-30 ■ BMI 30-35 ■ BMI 35-40 ■ BMI ≥ 40

# Saint Kitts and Nevis Caribbean

## Men

## Women

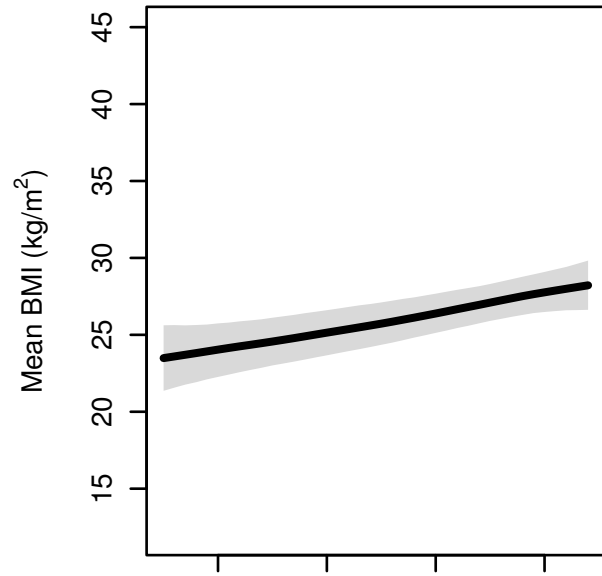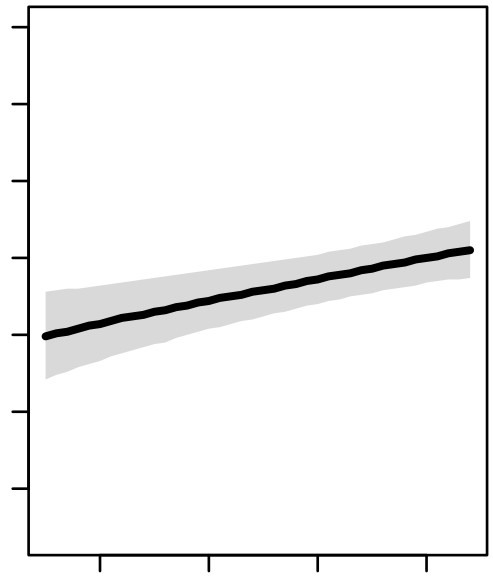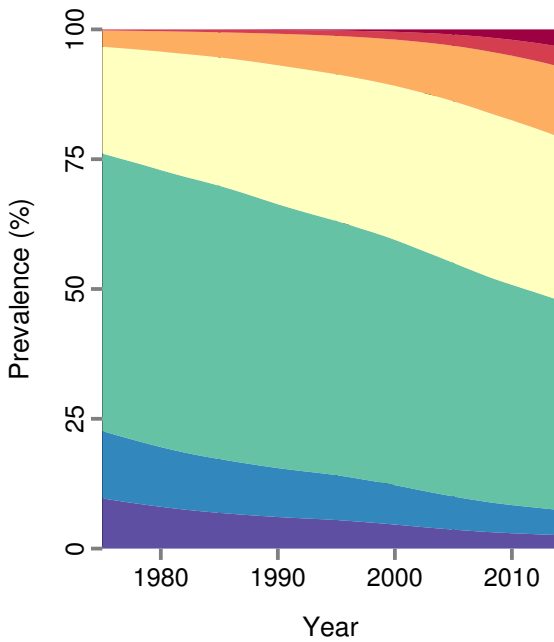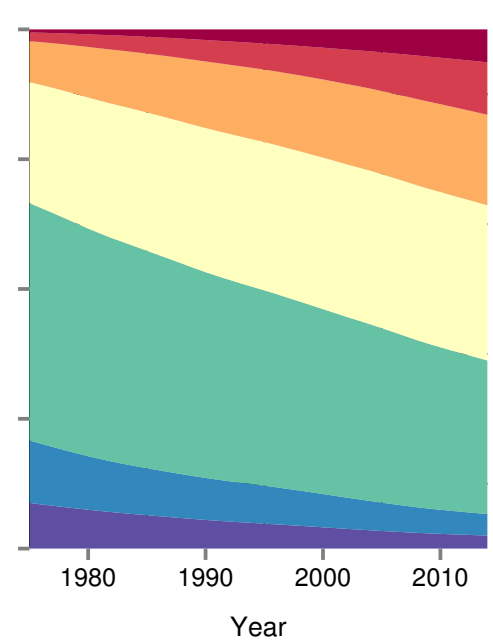

■ BMI <18.5 ■ BMI 18.5-20 ■ BMI 20-25 ■ BMI 25-30 ■ BMI 30-35 ■ BMI 35-40 ■ BMI ≥ 40

# Saint Lucia Caribbean

## Men

## Women

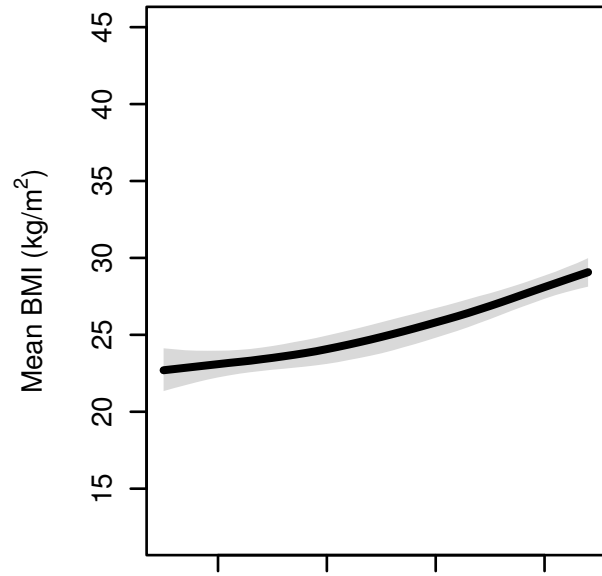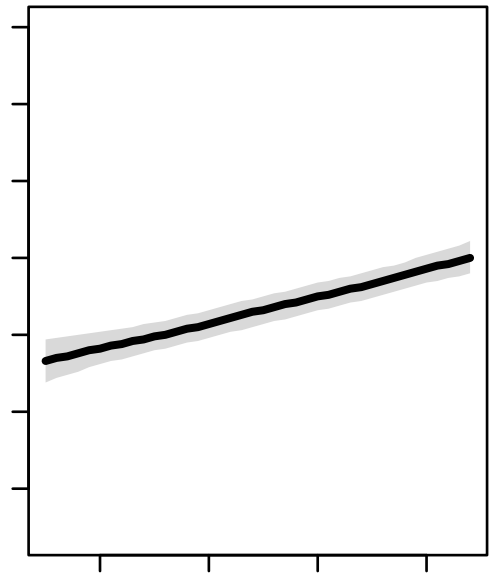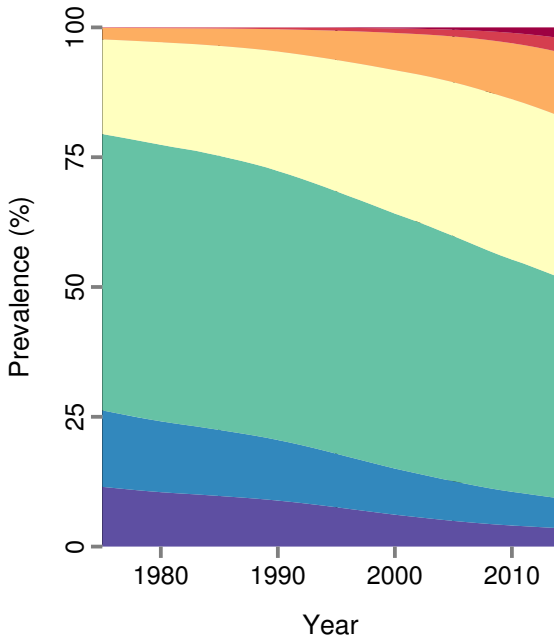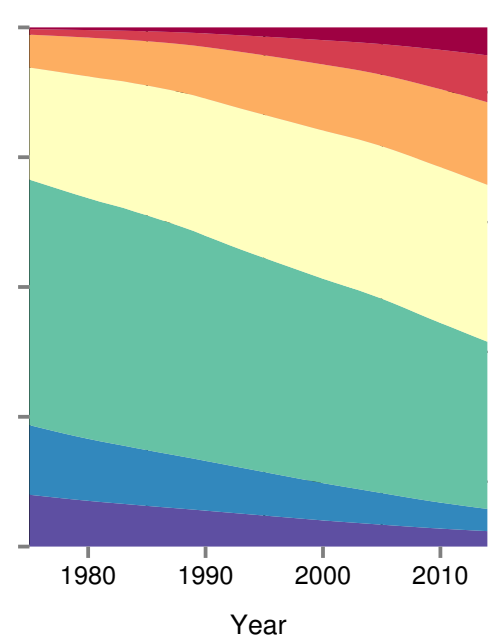

■ BMI <18.5 ■ BMI 18.5-20 ■ BMI 20-25 ■ BMI 25-30 ■ BMI 30-35 ■ BMI 35-40 ■ BMI ≥ 40

# Saint Vincent and the Grenadines Caribbean

## Men

## Women

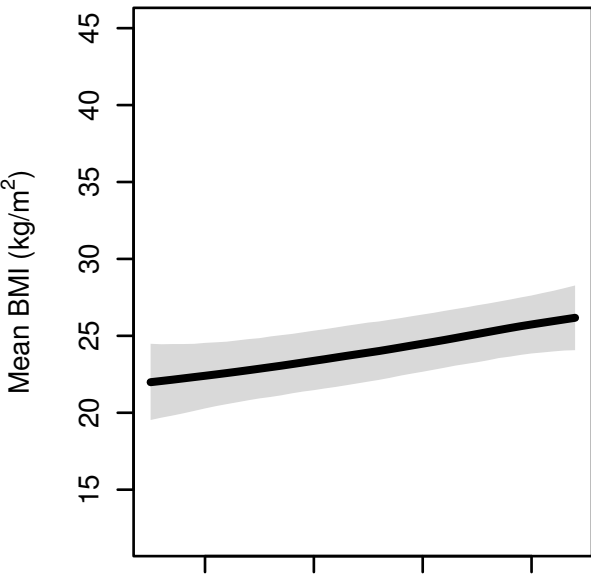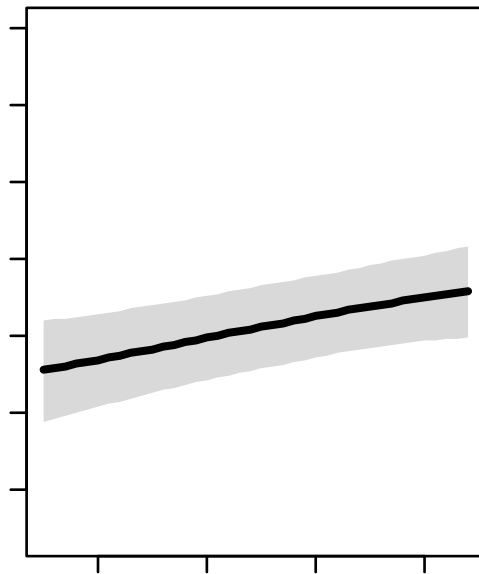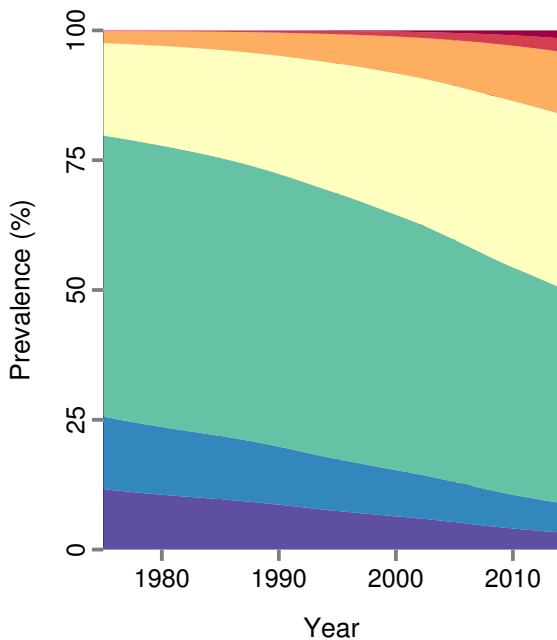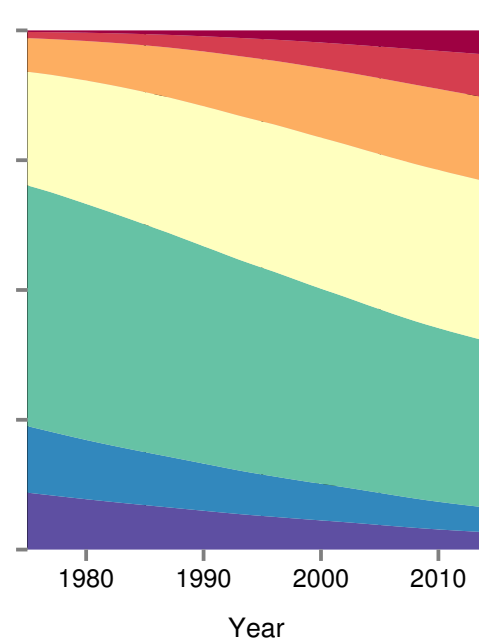

■ BMI <18.5 ■ BMI 18.5-20 ■ BMI 20-25 ■ BMI 25-30 ■ BMI 30-35 ■ BMI 35-40 ■ BMI ≥ 40

Samoa  
Polynesia and Micronesia

Men

Women

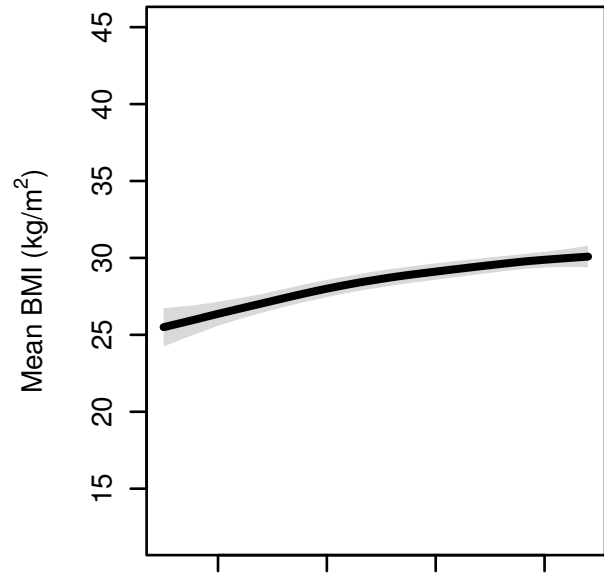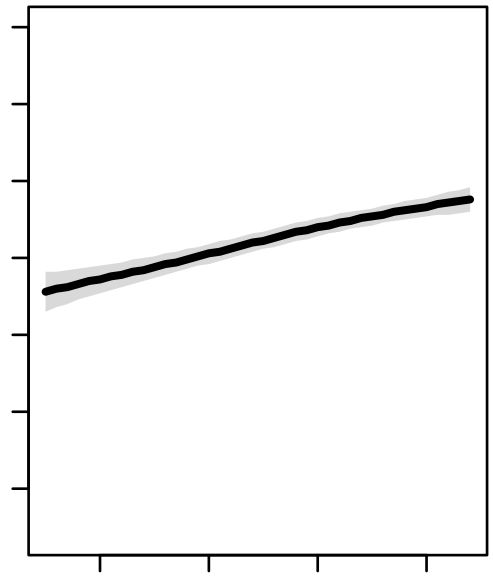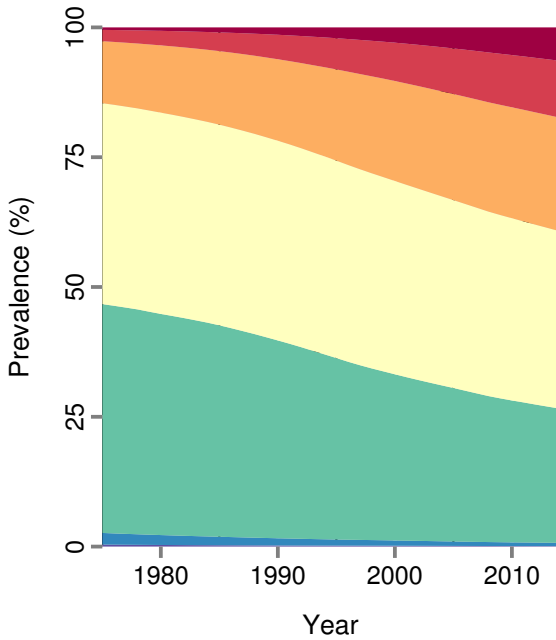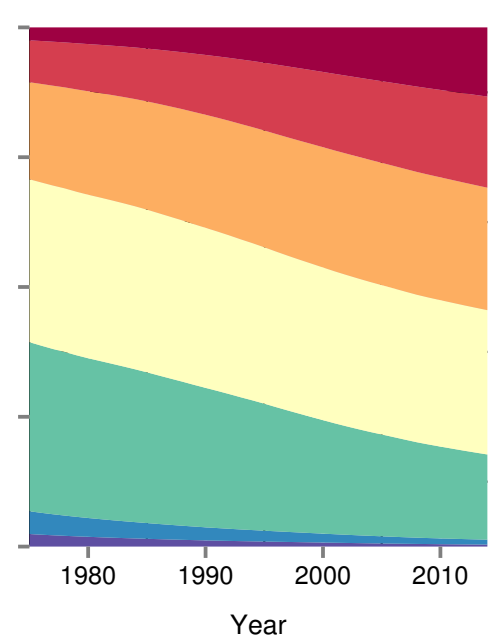

■ BMI <18.5 ■ BMI 18.5-20 ■ BMI 20-25 ■ BMI 25-30 ■ BMI 30-35 ■ BMI 35-40 ■ BMI ≥ 40

# Sao Tome and Principe

## West Africa

### Men

### Women

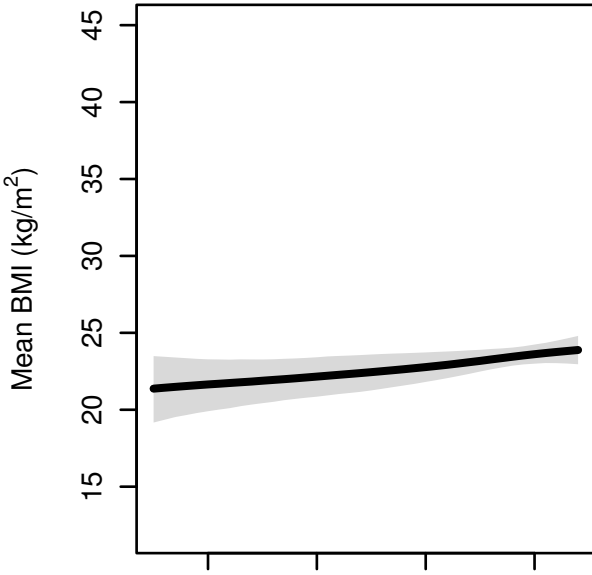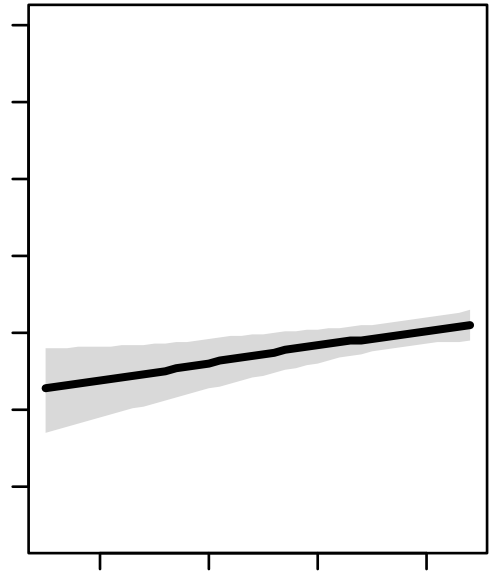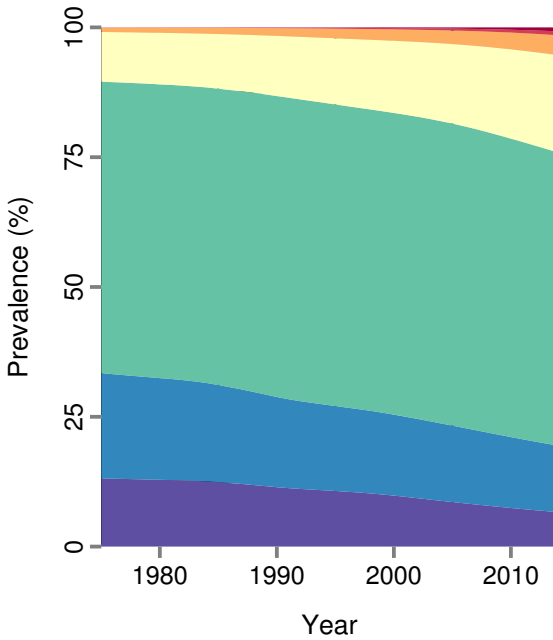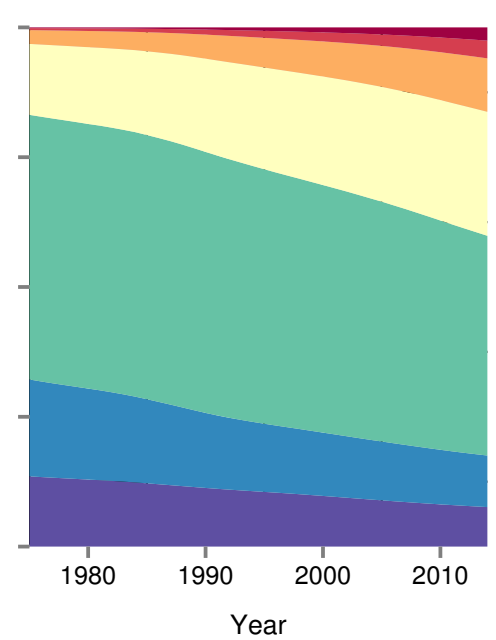

■ BMI <18.5 ■ BMI 18.5-20 ■ BMI 20-25 ■ BMI 25-30 ■ BMI 30-35 ■ BMI 35-40 ■ BMI ≥ 40

# Saudi Arabia

Middle East and North Africa

## Men

## Women

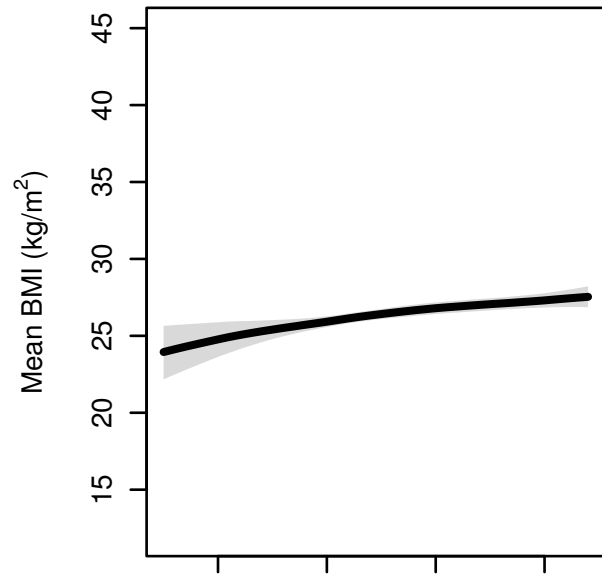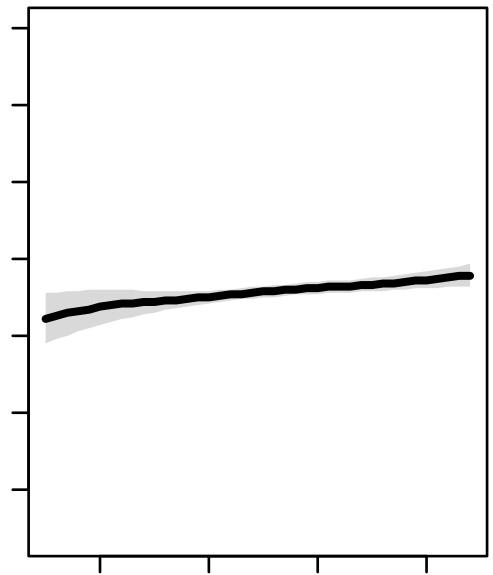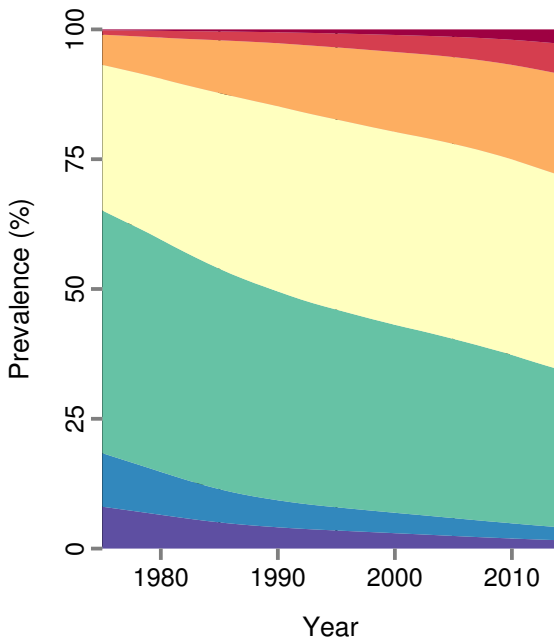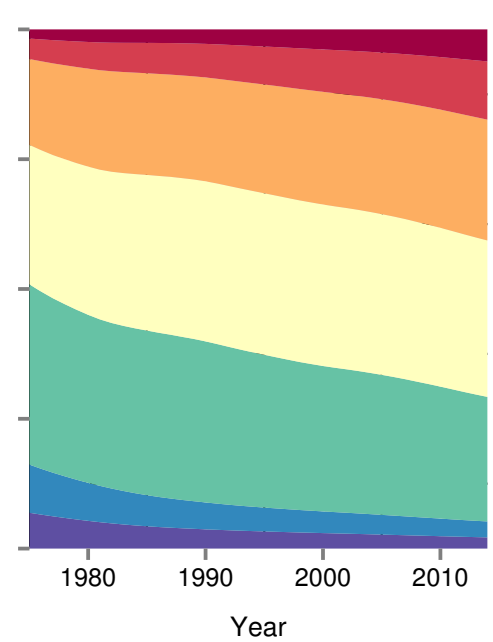

■ BMI <18.5 ■ BMI 18.5-20 ■ BMI 20-25 ■ BMI 25-30 ■ BMI 30-35 ■ BMI 35-40 ■ BMI ≥ 40



Senegal  
West Africa

Men

Women

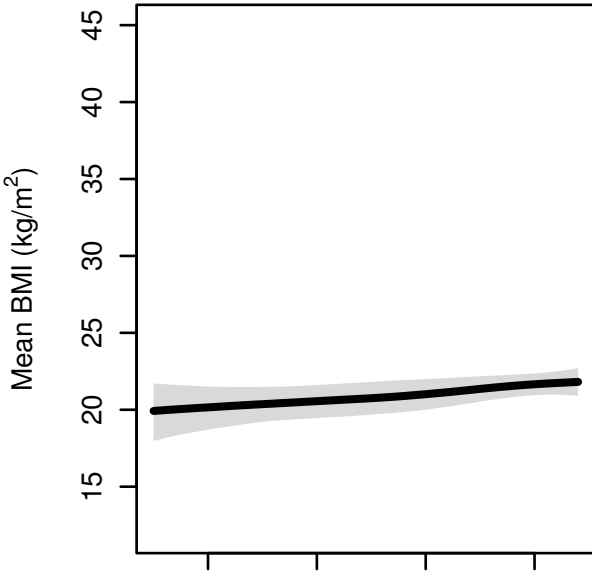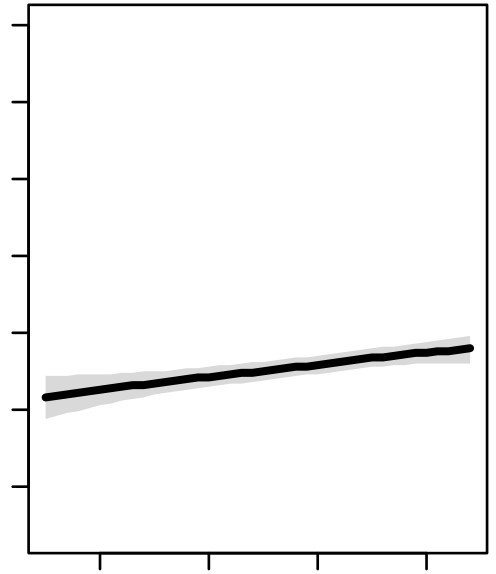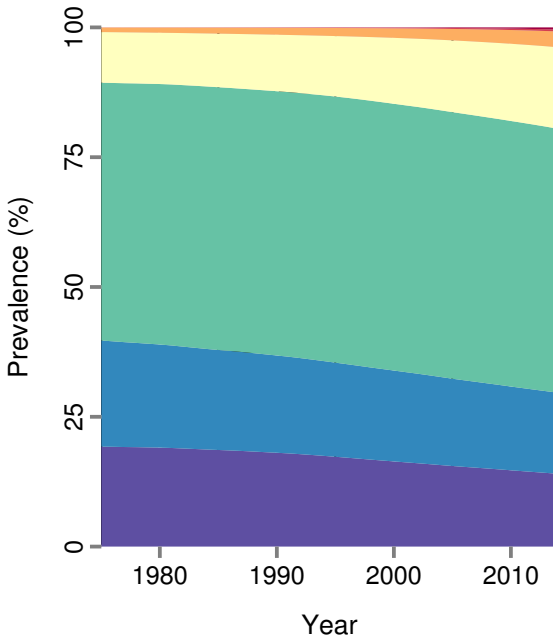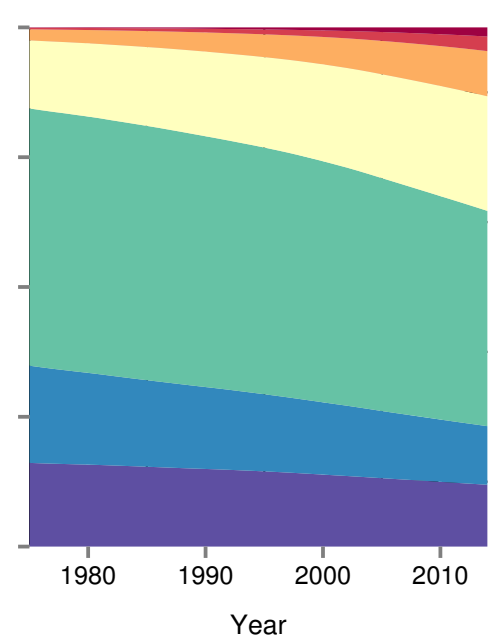

■ BMI <18.5 ■ BMI 18.5-20 ■ BMI 20-25 ■ BMI 25-30 ■ BMI 30-35 ■ BMI 35-40 ■ BMI ≥ 40

Serbia  
Central Europe

Men

Women

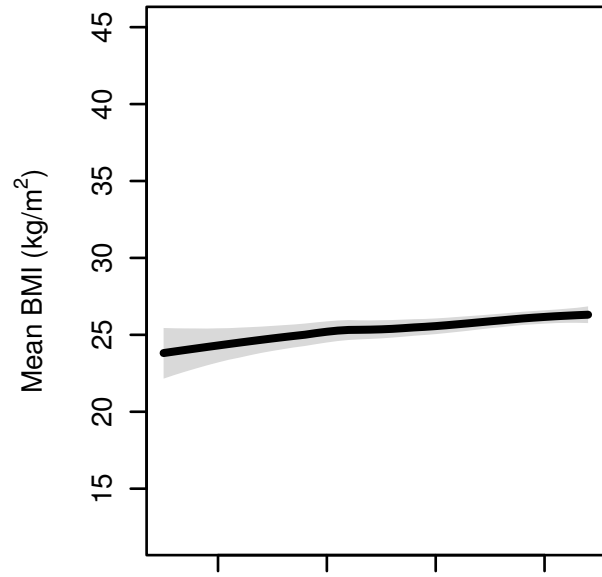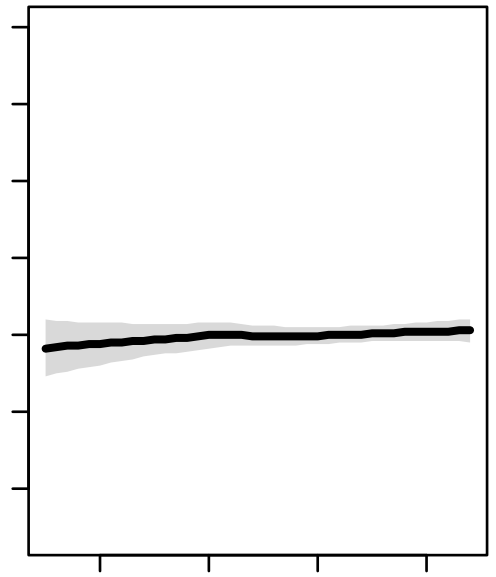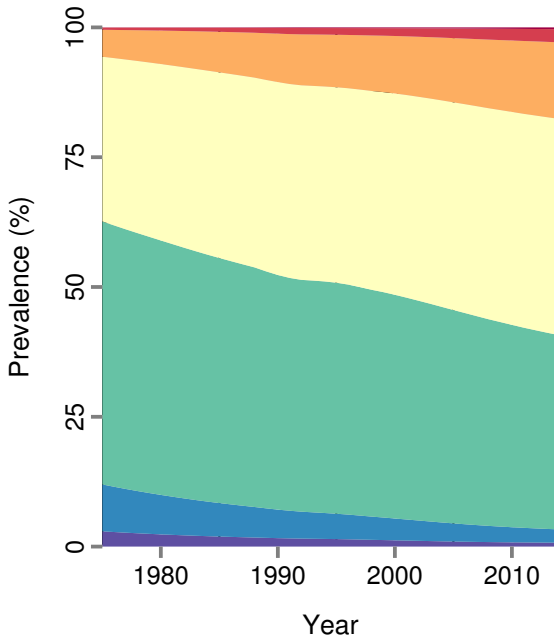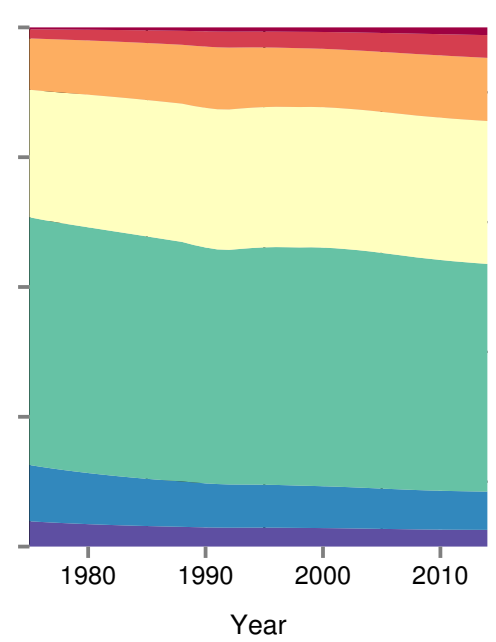

■ BMI <18.5 ■ BMI 18.5-20 ■ BMI 20-25 ■ BMI 25-30 ■ BMI 30-35 ■ BMI 35-40 ■ BMI ≥ 40

Seychelles  
East Africa

Men

Women

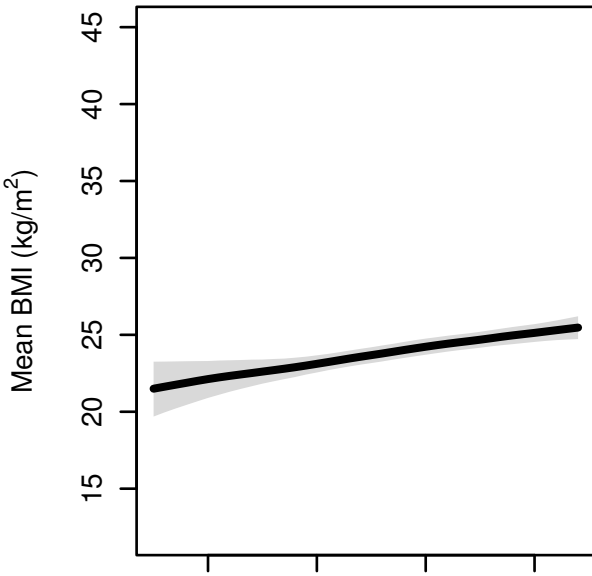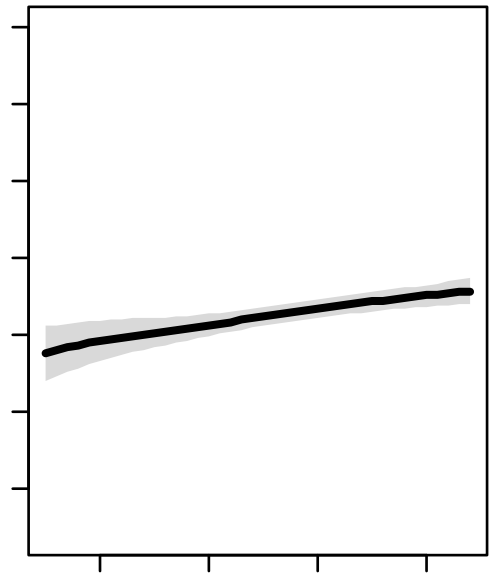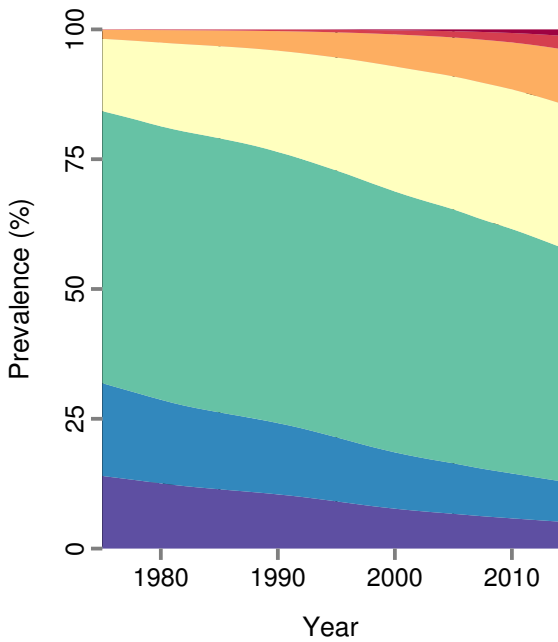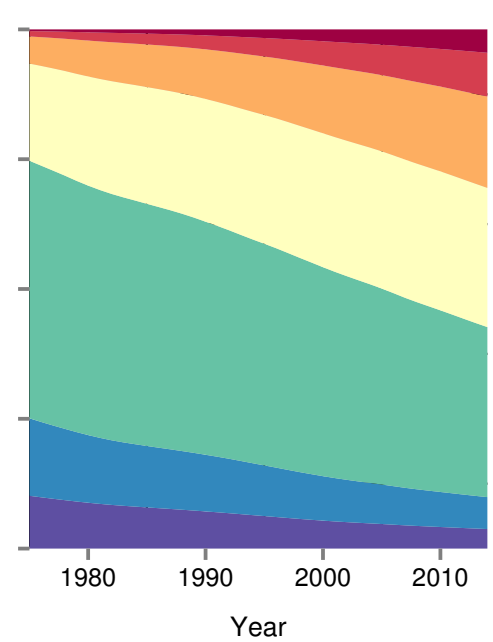

■ BMI <18.5 ■ BMI 18.5-20 ■ BMI 20-25 ■ BMI 25-30 ■ BMI 30-35 ■ BMI 35-40 ■ BMI ≥ 40

# Sierra Leone West Africa

## Men

## Women

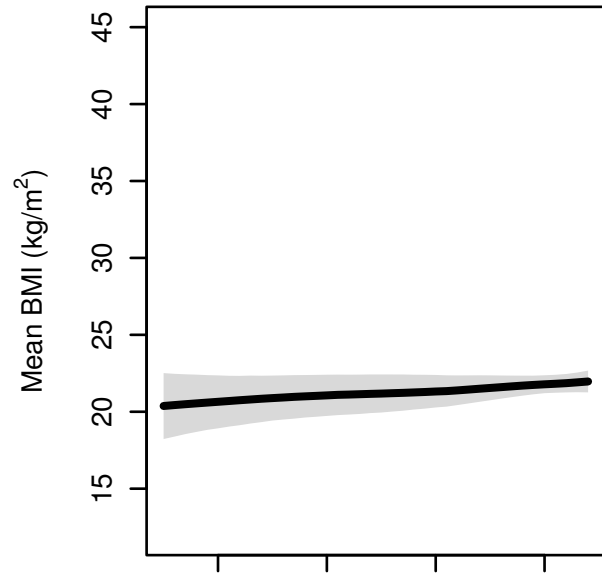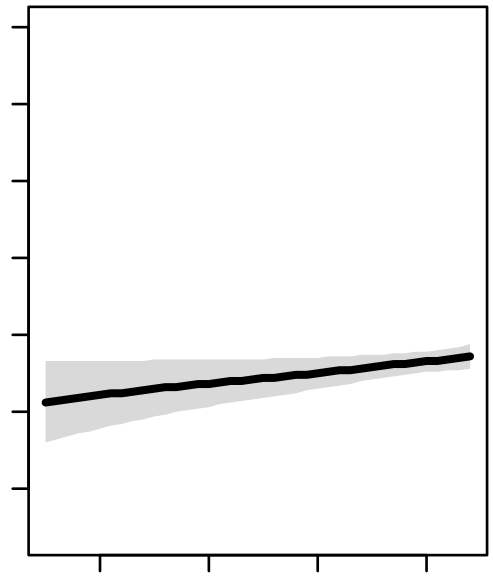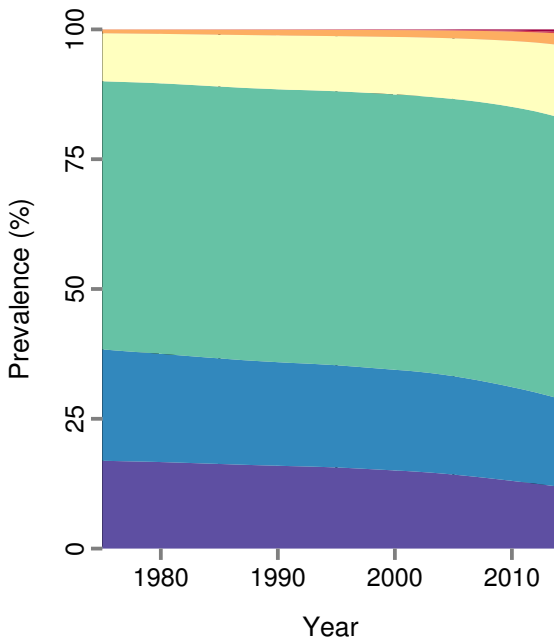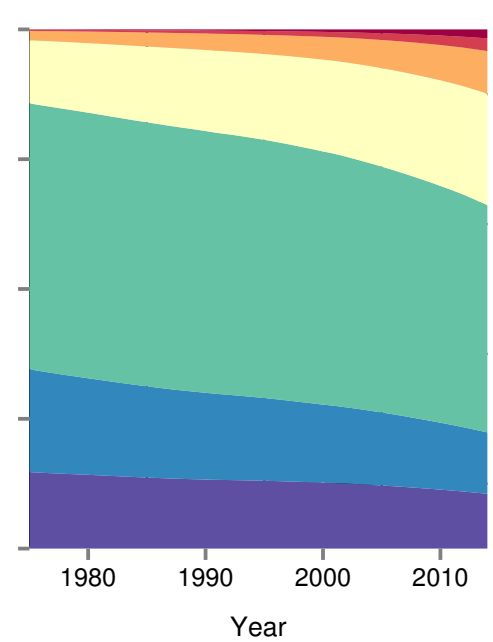

■ BMI <18.5 ■ BMI 18.5-20 ■ BMI 20-25 ■ BMI 25-30 ■ BMI 30-35 ■ BMI 35-40 ■ BMI ≥ 40

# Singapore

## High-income Asia Pacific

### Men

### Women

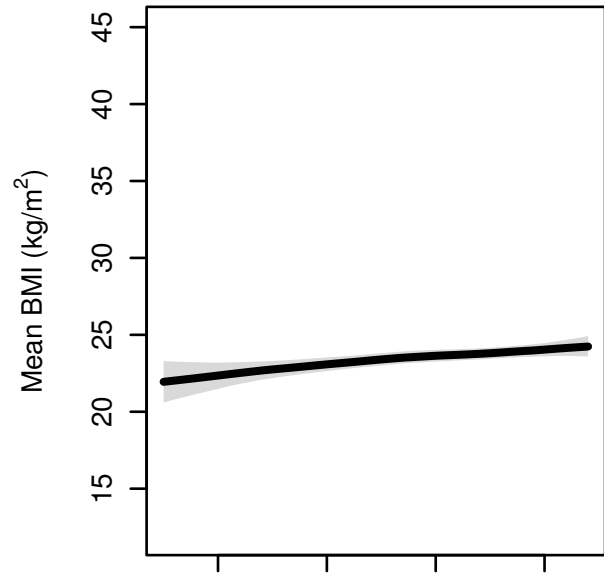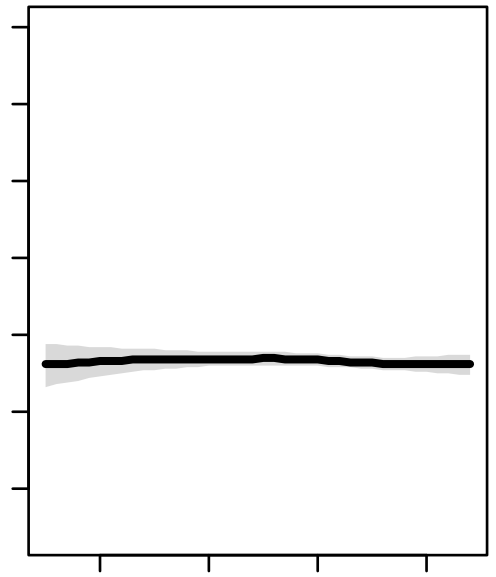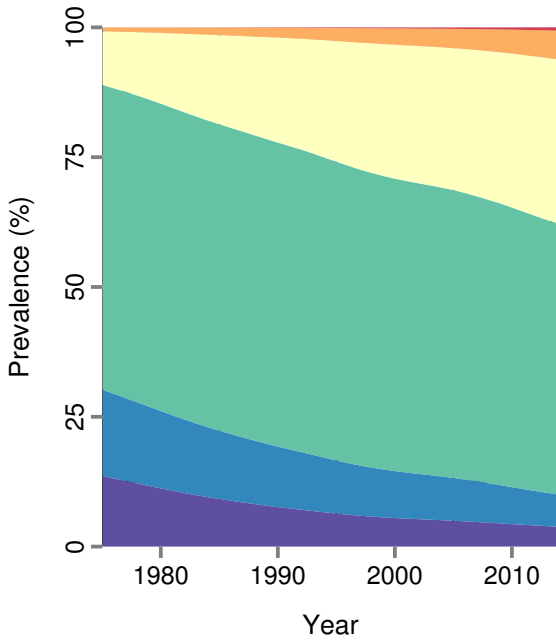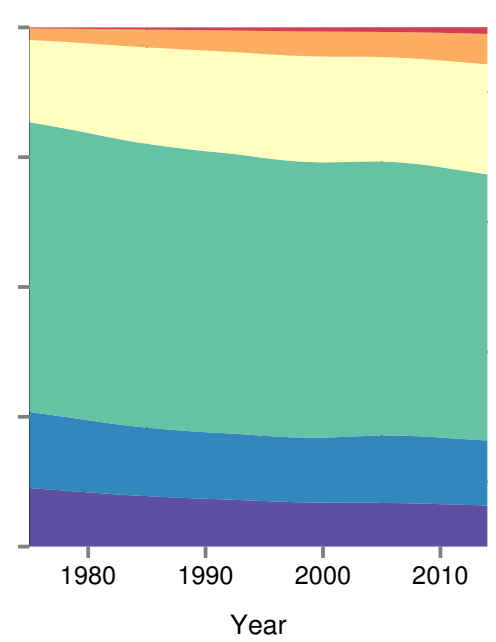

■ BMI <18.5 ■ BMI 18.5-20 ■ BMI 20-25 ■ BMI 25-30 ■ BMI 30-35 ■ BMI 35-40 ■ BMI ≥ 40

Slovakia  
Central Europe

Men

Women

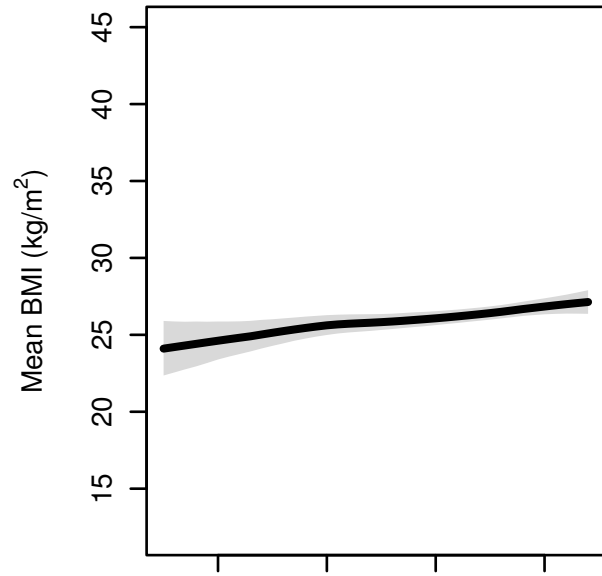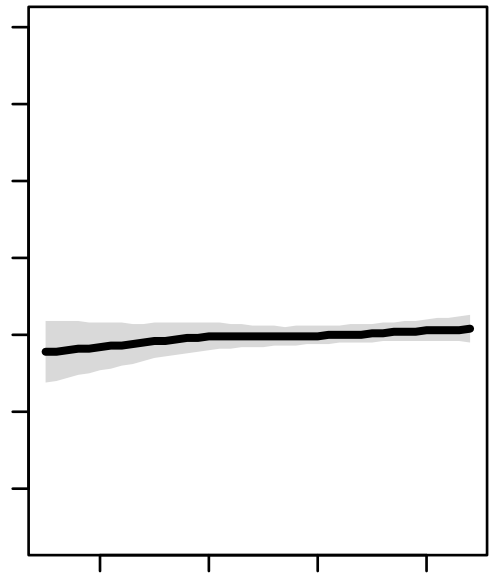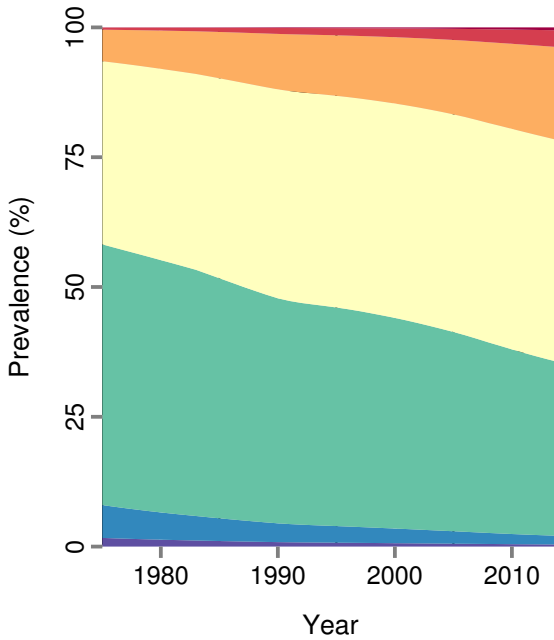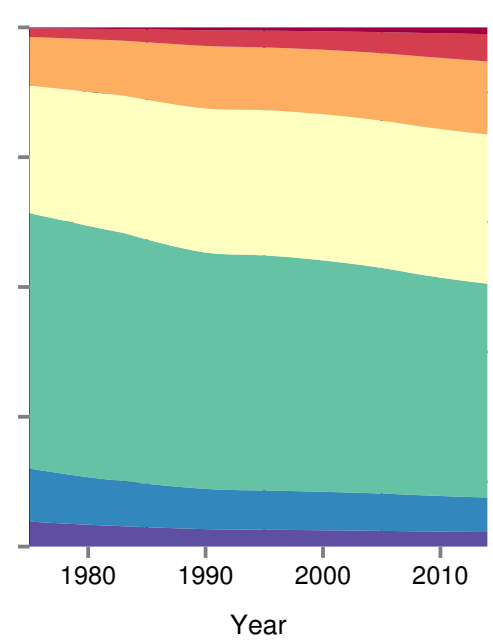

■ BMI <18.5 ■ BMI 18.5-20 ■ BMI 20-25 ■ BMI 25-30 ■ BMI 30-35 ■ BMI 35-40 ■ BMI ≥ 40

Slovenia  
Central Europe

Men

Women

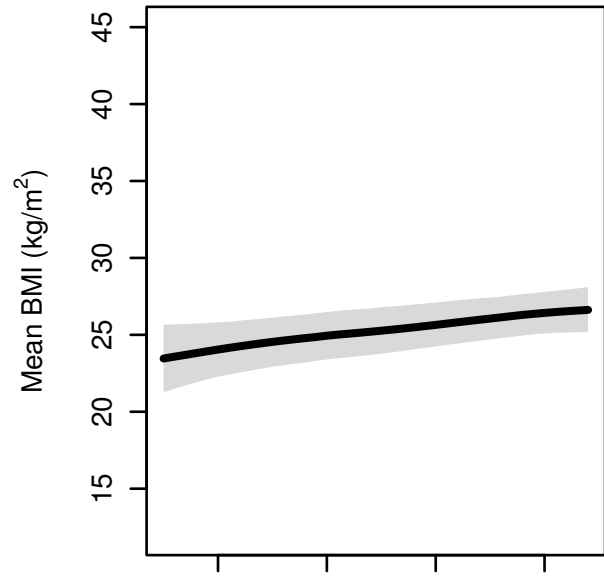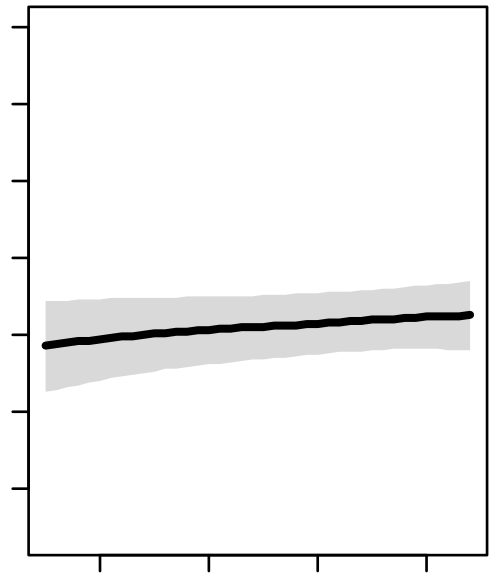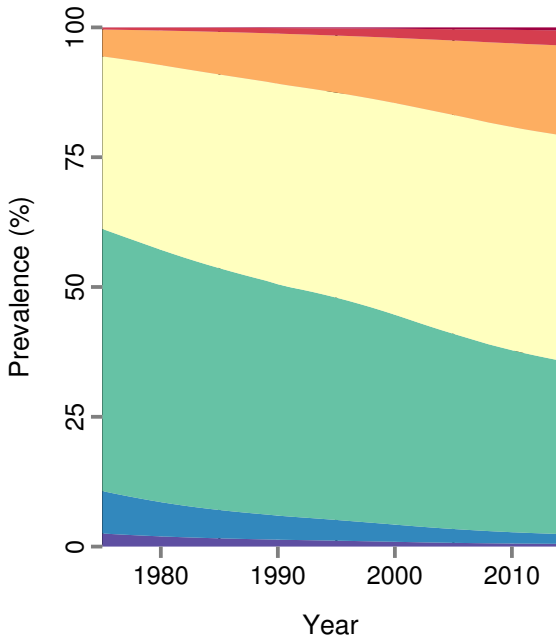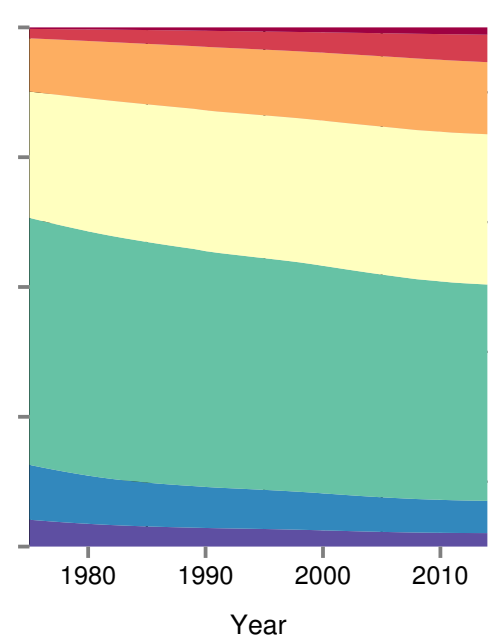

■ BMI <18.5 ■ BMI 18.5-20 ■ BMI 20-25 ■ BMI 25-30 ■ BMI 30-35 ■ BMI 35-40 ■ BMI ≥ 40

# Solomon Islands Melanesia

## Men

## Women

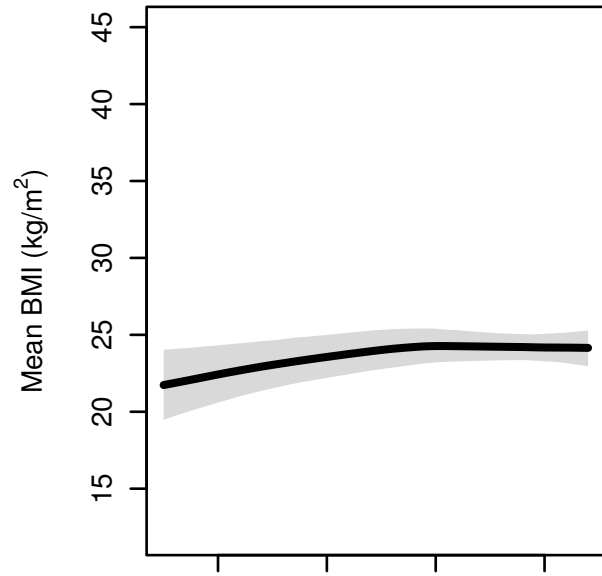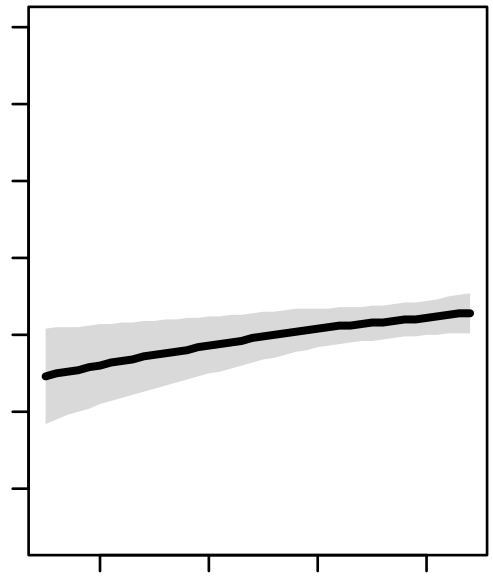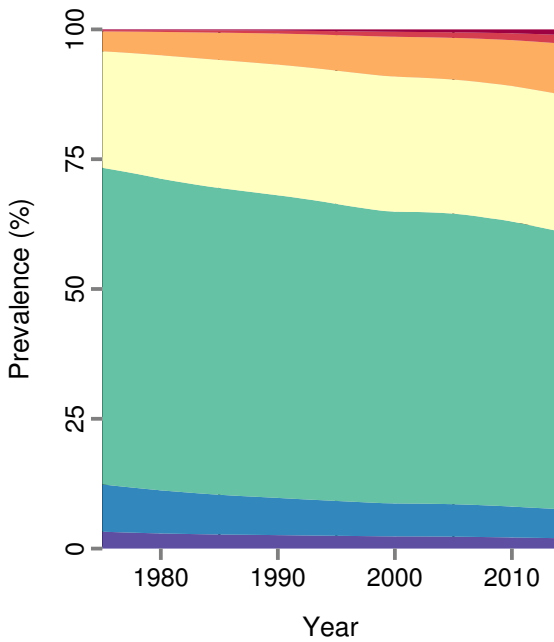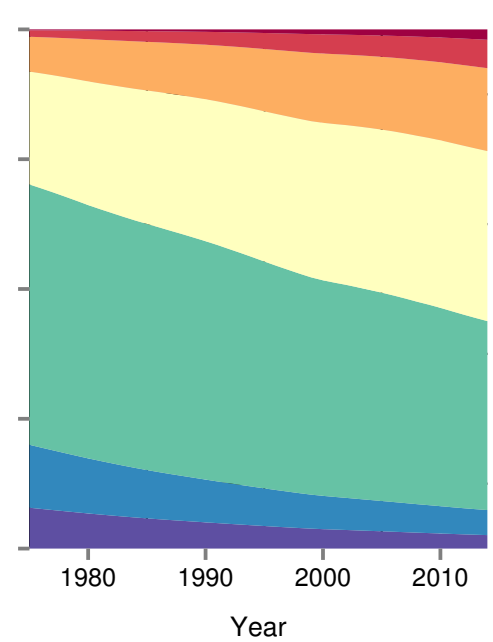

■ BMI <18.5 ■ BMI 18.5-20 ■ BMI 20-25 ■ BMI 25-30 ■ BMI 30-35 ■ BMI 35-40 ■ BMI ≥ 40



Somalia  
East Africa

Men

Women

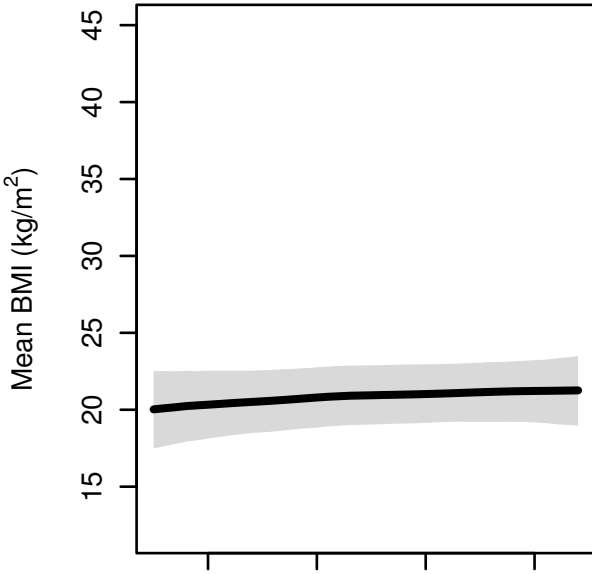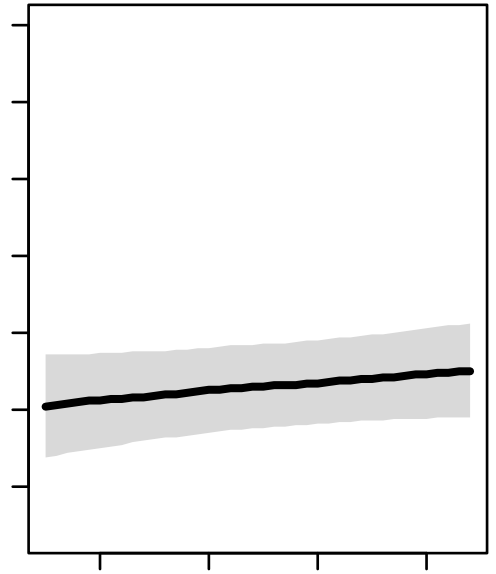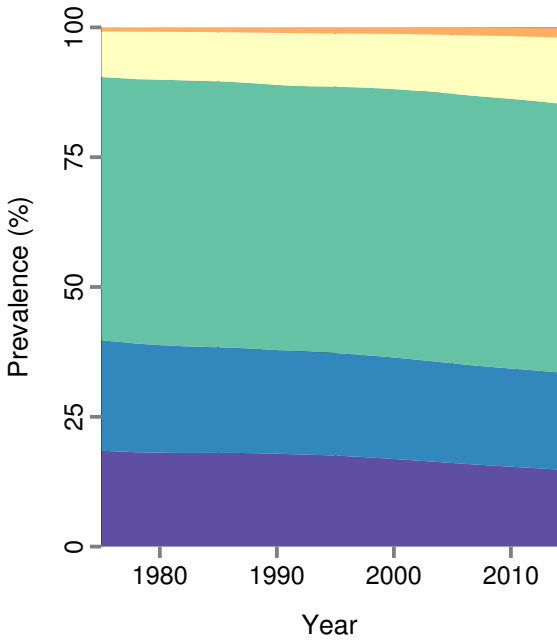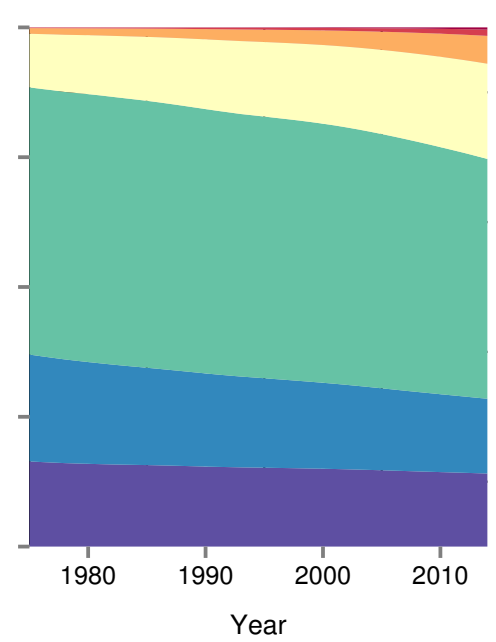

■ BMI <18.5 ■ BMI 18.5-20 ■ BMI 20-25 ■ BMI 25-30 ■ BMI 30-35 ■ BMI 35-40 ■ BMI ≥ 40

South Africa  
Southern Africa

Men

Women

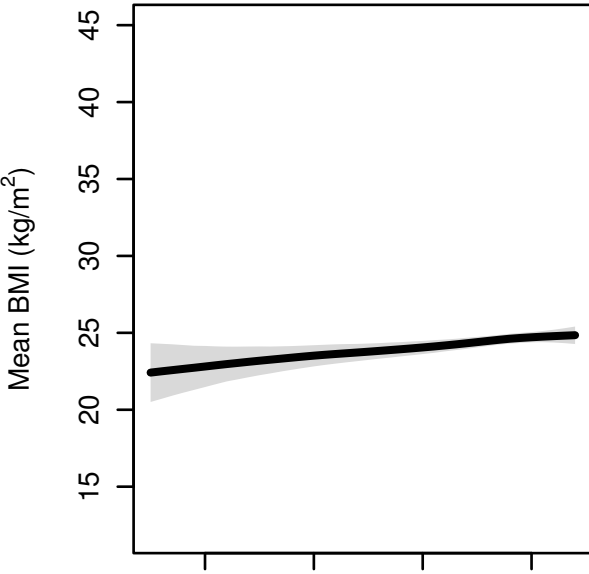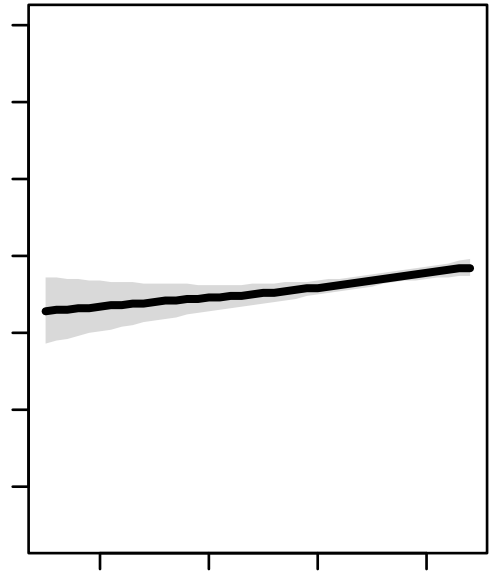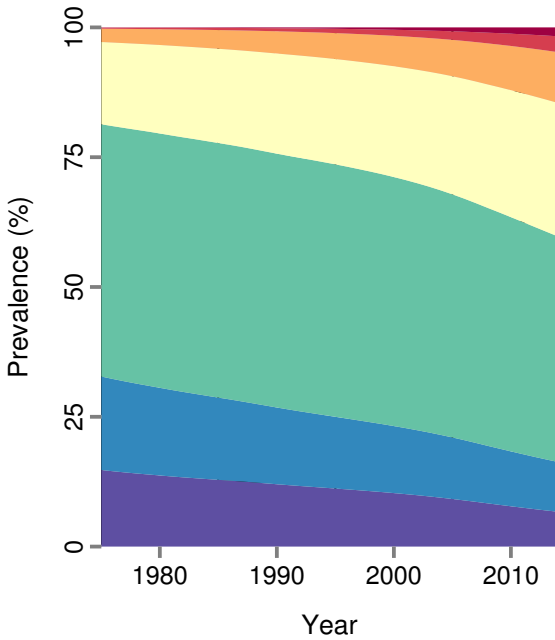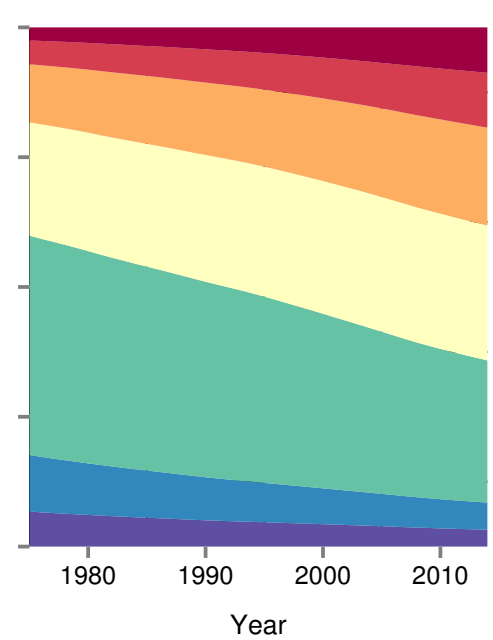

■ BMI <18.5 ■ BMI 18.5-20 ■ BMI 20-25 ■ BMI 25-30 ■ BMI 30-35 ■ BMI 35-40 ■ BMI ≥ 40

South Korea  
High-income Asia Pacific

Men

Women

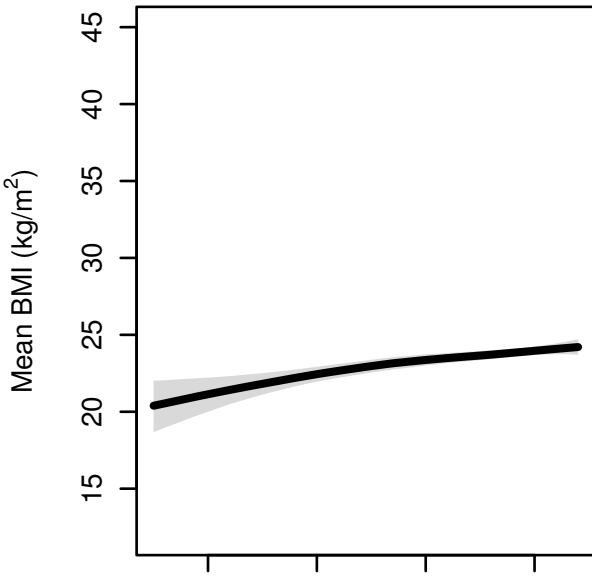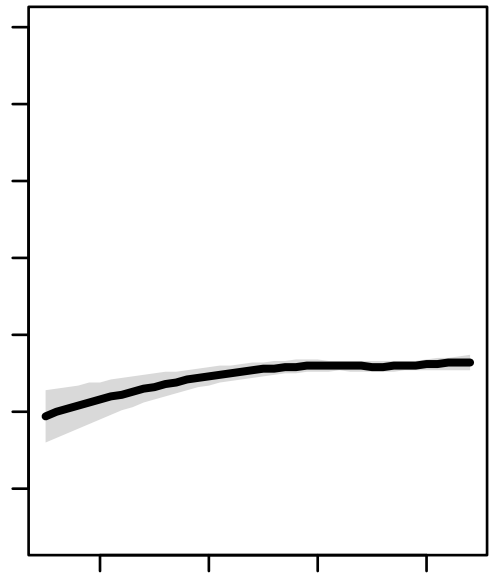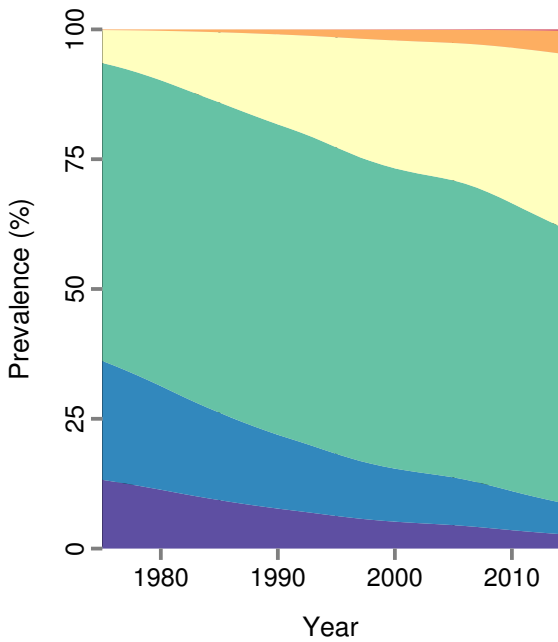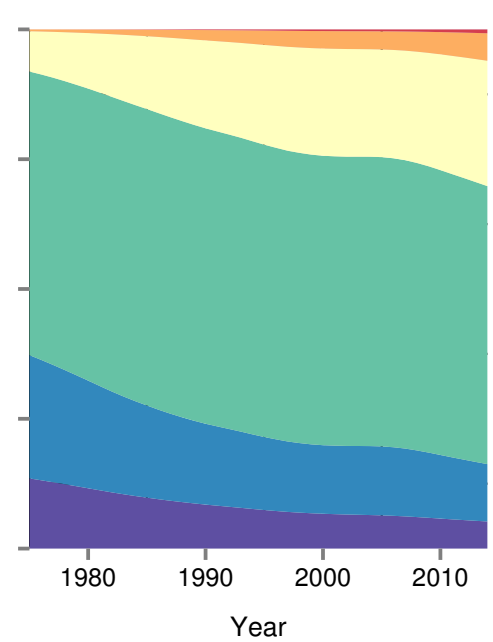

■ BMI <18.5 ■ BMI 18.5-20 ■ BMI 20-25 ■ BMI 25-30 ■ BMI 30-35 ■ BMI 35-40 ■ BMI ≥ 40

# Spain

South Western Europe

## Men

## Women

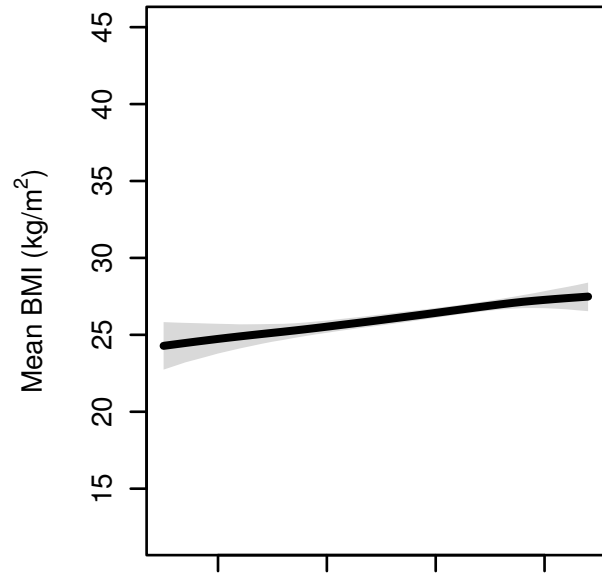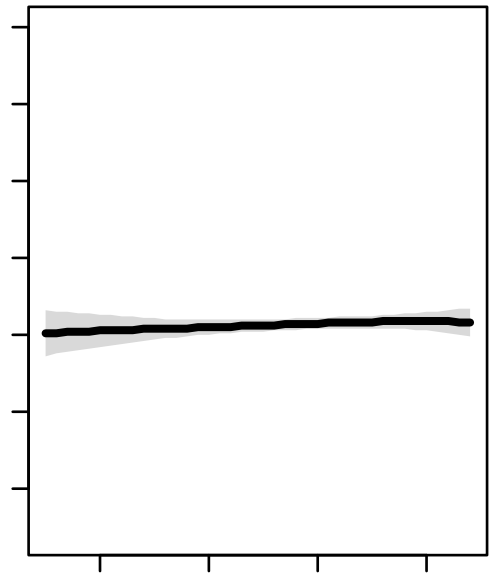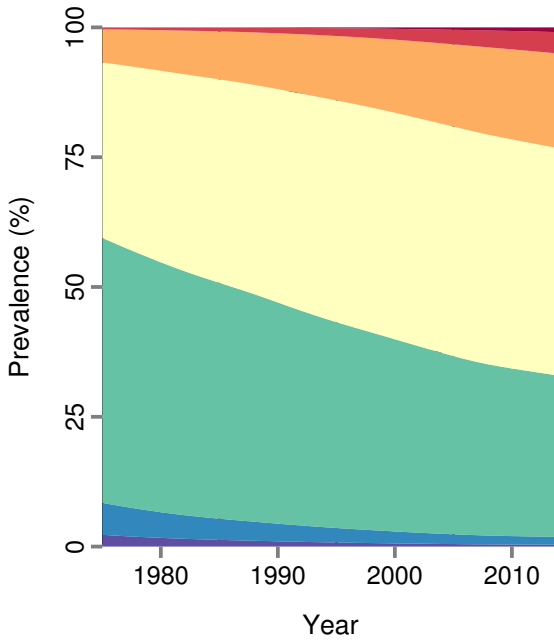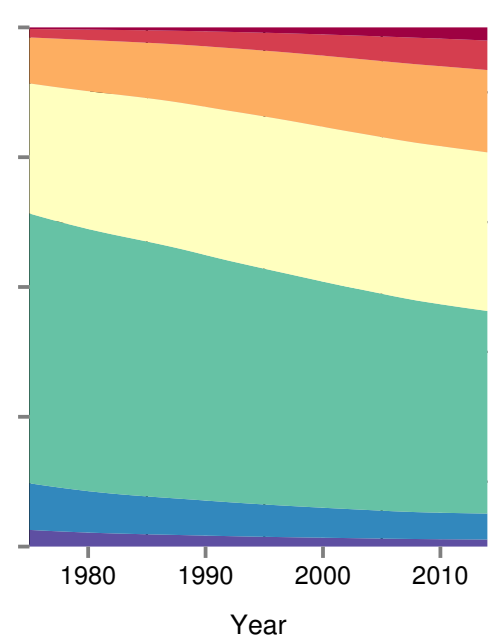

■ BMI <18.5 ■ BMI 18.5-20 ■ BMI 20-25 ■ BMI 25-30 ■ BMI 30-35 ■ BMI 35-40 ■ BMI ≥ 40

Sri Lanka  
South East Asia

Men

Women

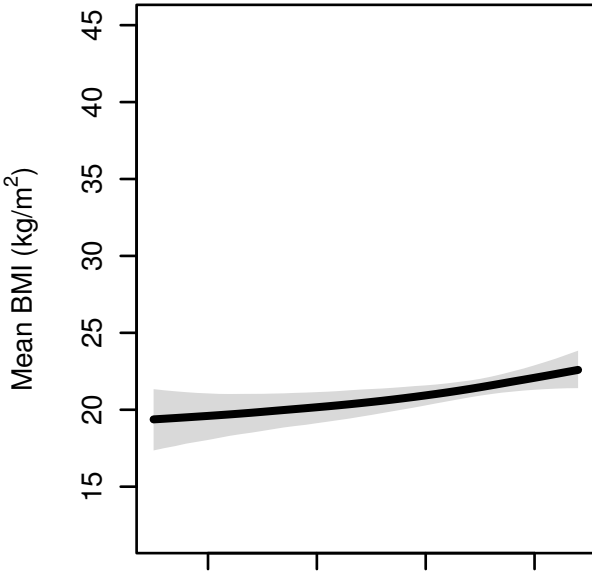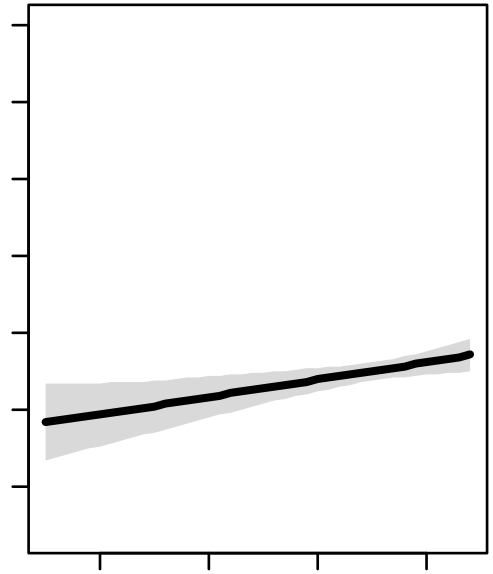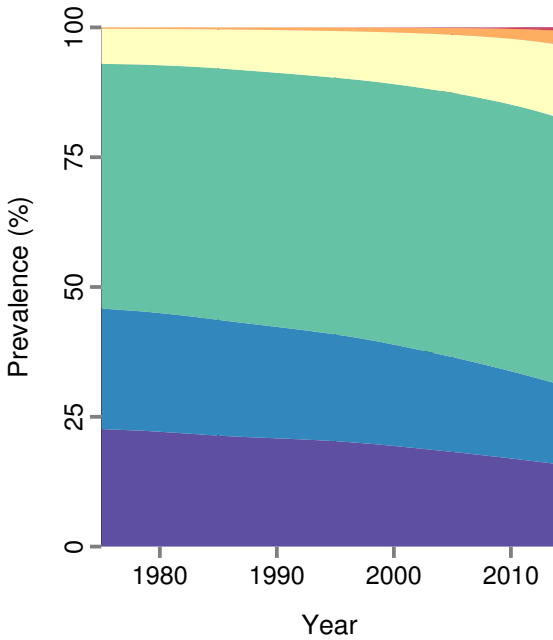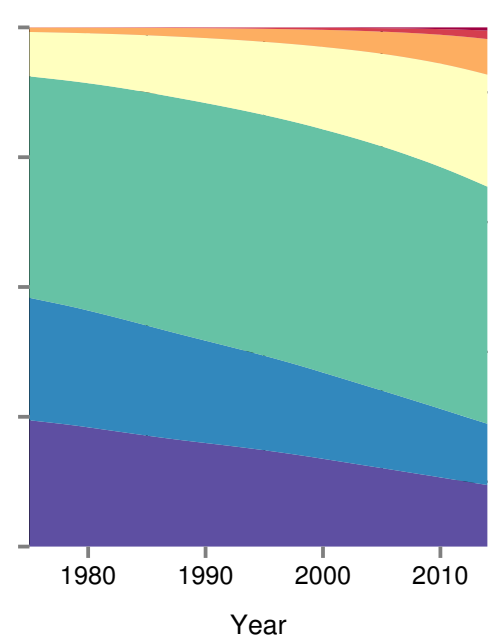

■ BMI <18.5 ■ BMI 18.5-20 ■ BMI 20-25 ■ BMI 25-30 ■ BMI 30-35 ■ BMI 35-40 ■ BMI ≥ 40

Sudan  
East Africa

Men

Women

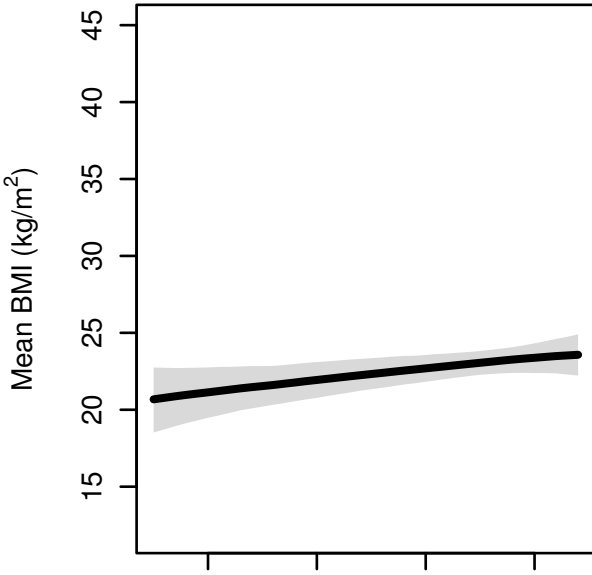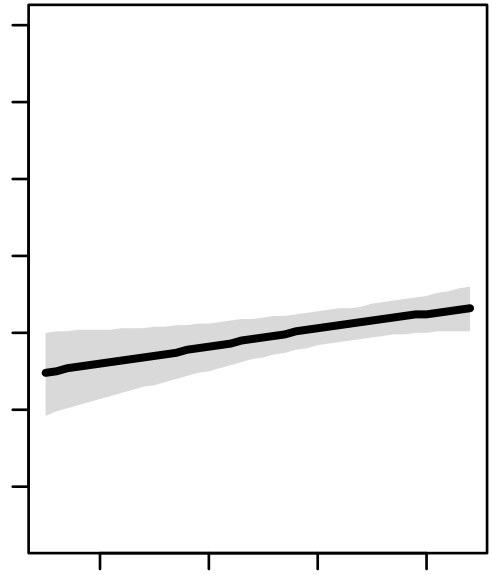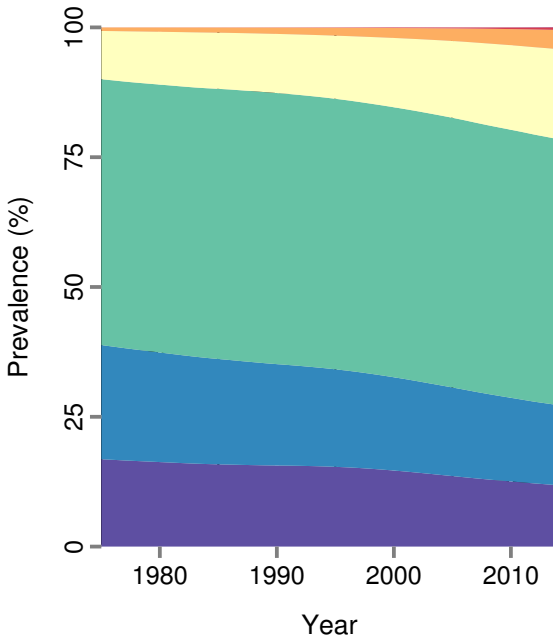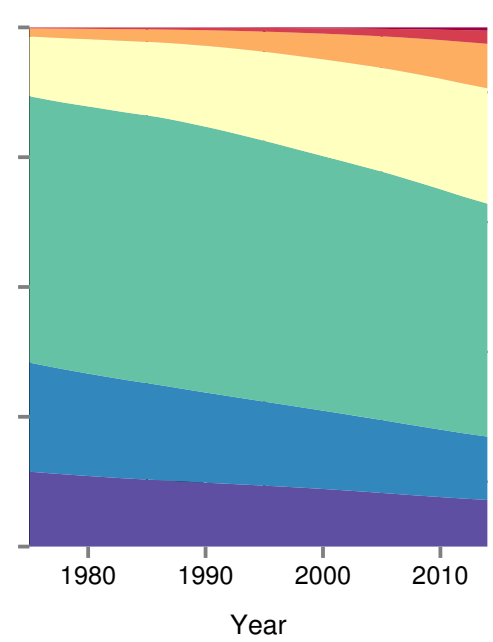

■ BMI <18.5 ■ BMI 18.5-20 ■ BMI 20-25 ■ BMI 25-30 ■ BMI 30-35 ■ BMI 35-40 ■ BMI ≥ 40

Suriname  
Caribbean

Men

Women

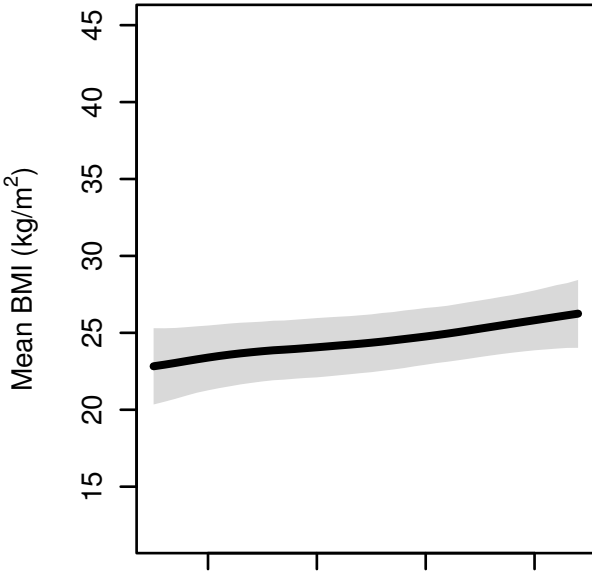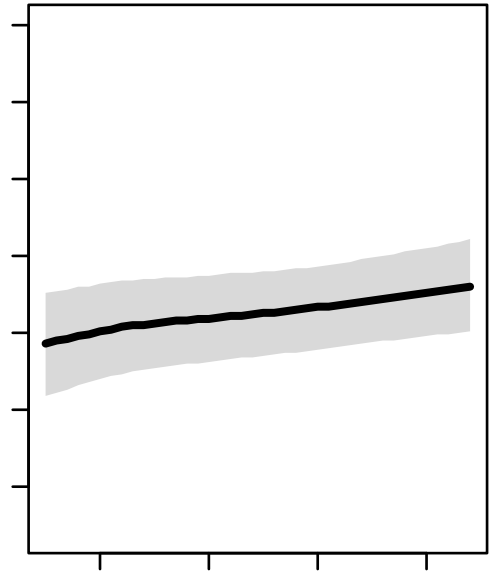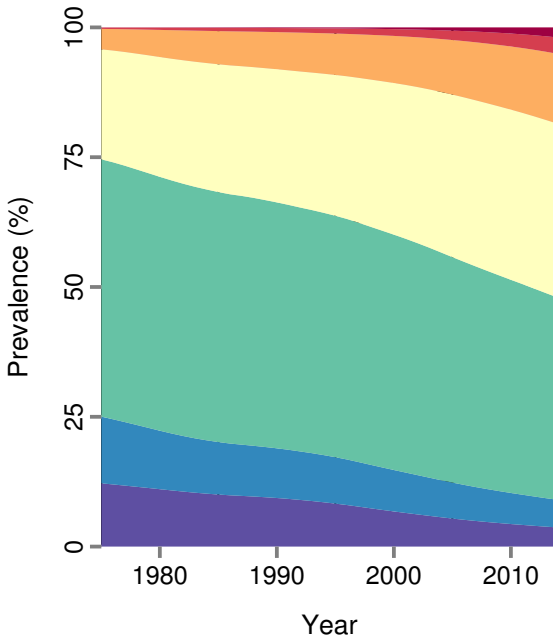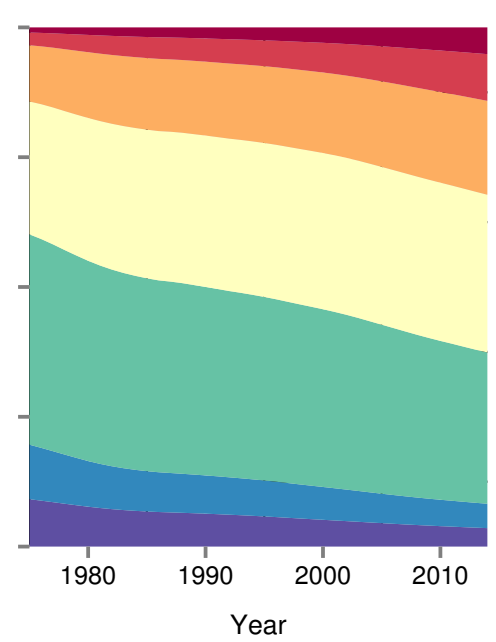

■ BMI <18.5 ■ BMI 18.5-20 ■ BMI 20-25 ■ BMI 25-30 ■ BMI 30-35 ■ BMI 35-40 ■ BMI ≥ 40

Swaziland  
Southern Africa

Men

Women

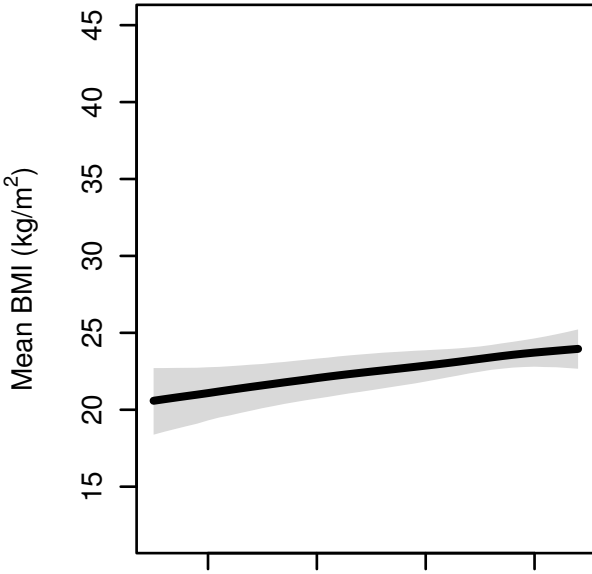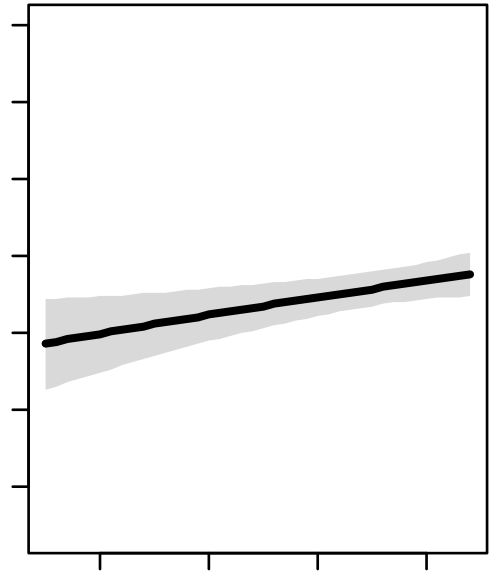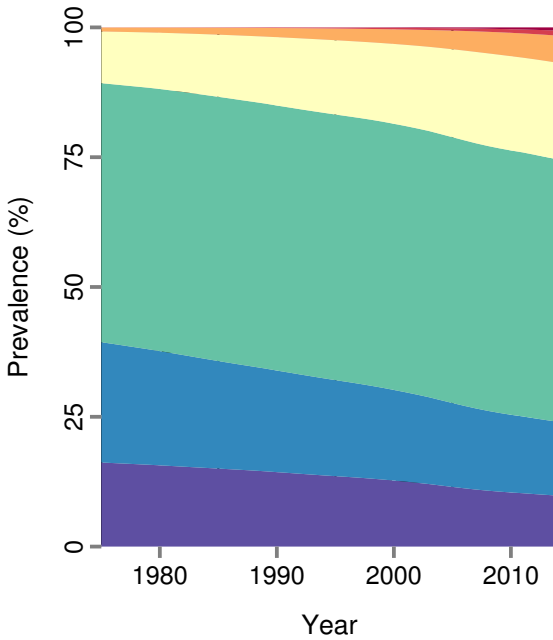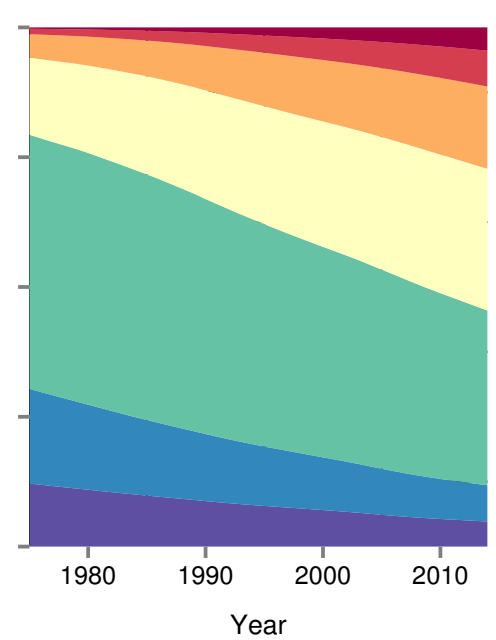

■ BMI <18.5 ■ BMI 18.5-20 ■ BMI 20-25 ■ BMI 25-30 ■ BMI 30-35 ■ BMI 35-40 ■ BMI ≥ 40



Sweden  
North Western Europe

Men

Women

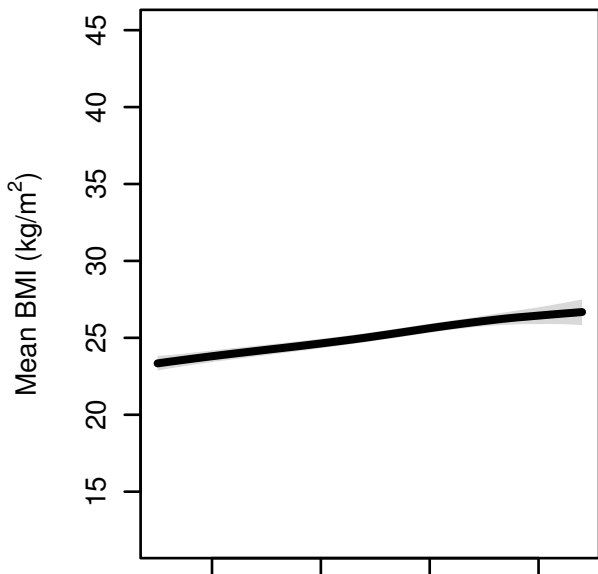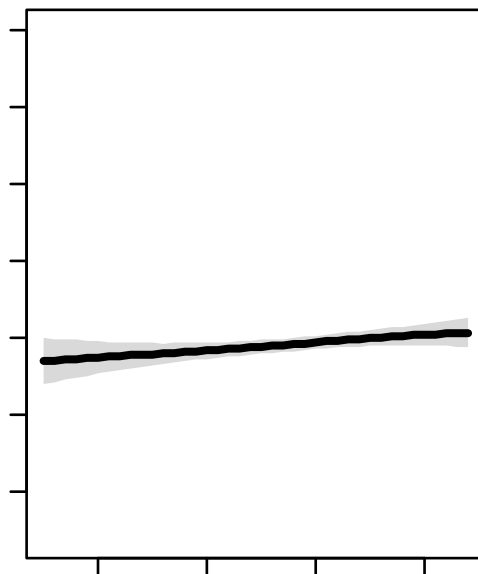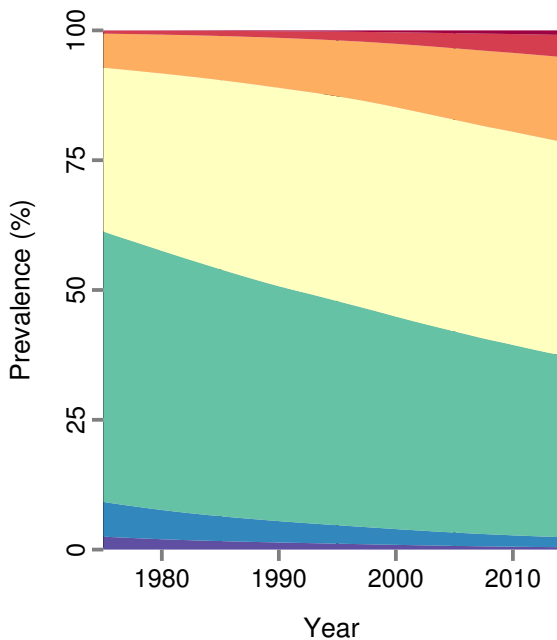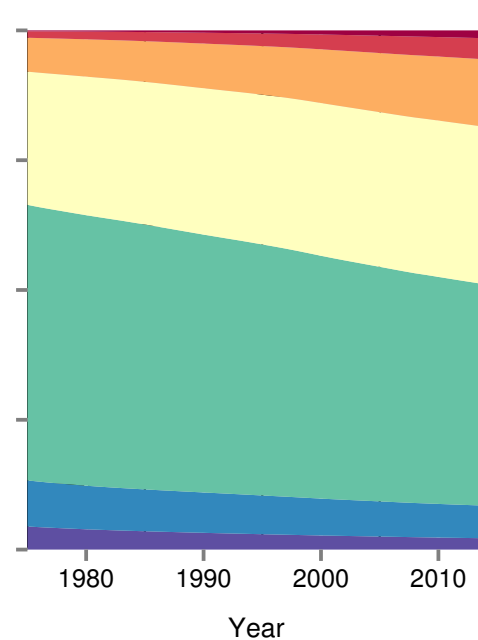

■ BMI <18.5 ■ BMI 18.5-20 ■ BMI 20-25 ■ BMI 25-30 ■ BMI 30-35 ■ BMI 35-40 ■ BMI ≥ 40

Switzerland  
North Western Europe

Men

Women

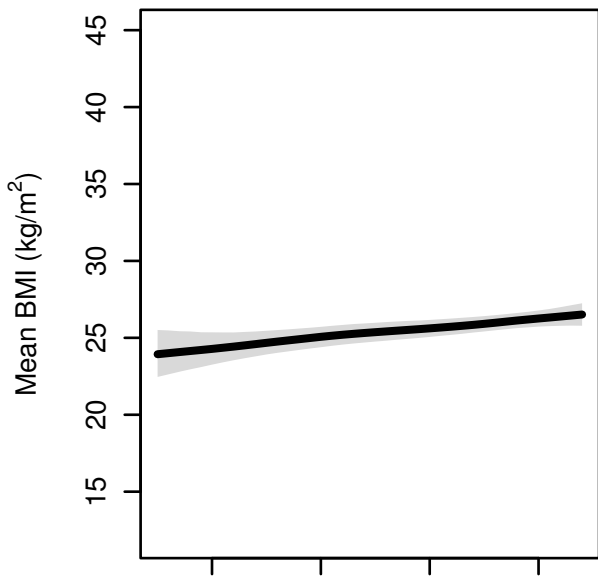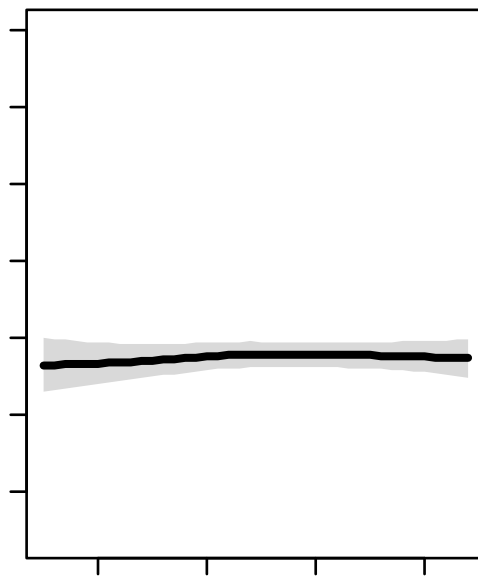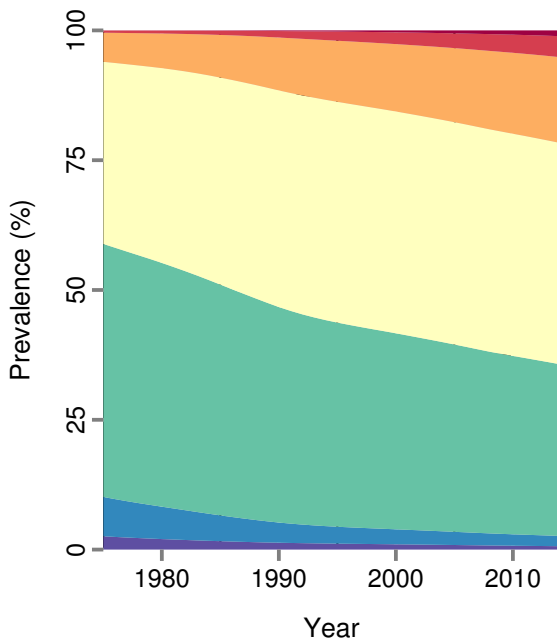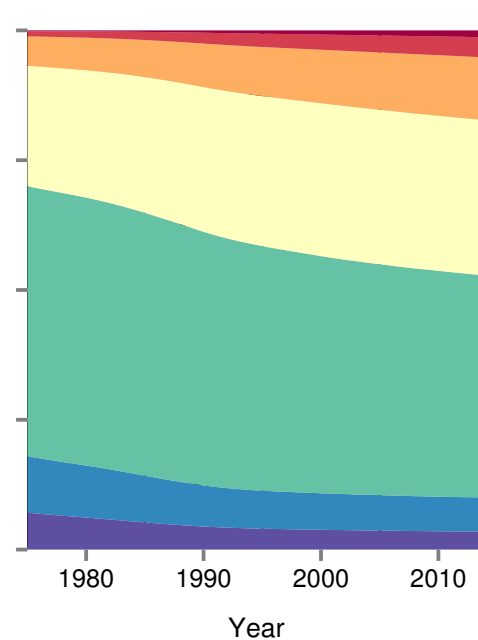

BMI <18.5 BMI 18.5-20 BMI 20-25 BMI 25-30 BMI 30-35 BMI 35-40 BMI ≥ 40

# Syrian Arab Republic

## Middle East and North Africa

### Men

### Women

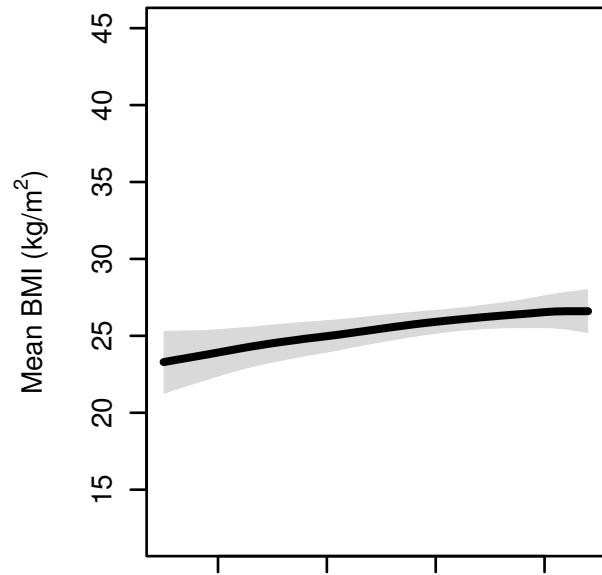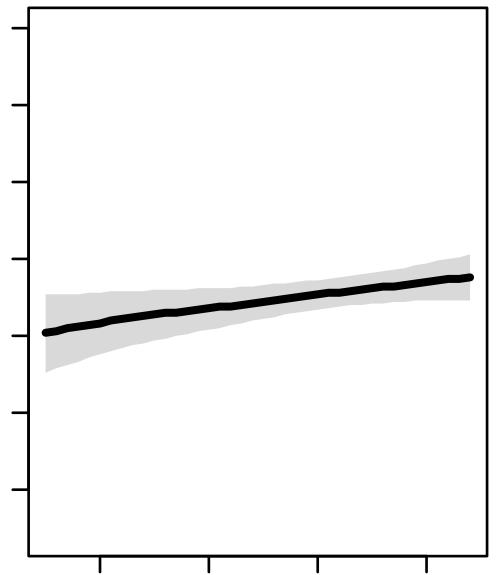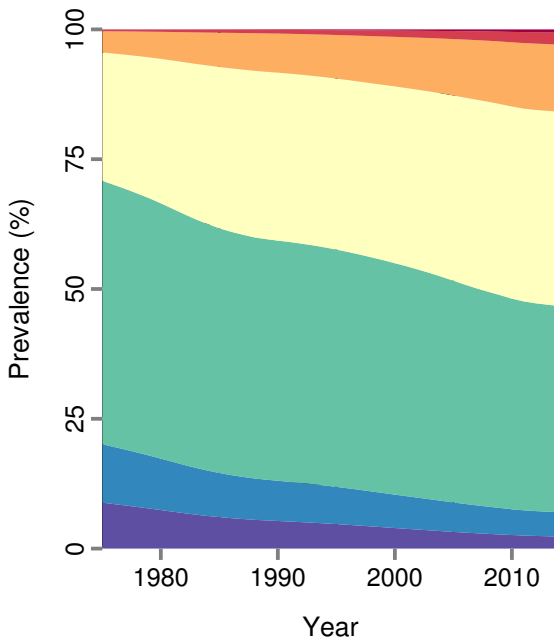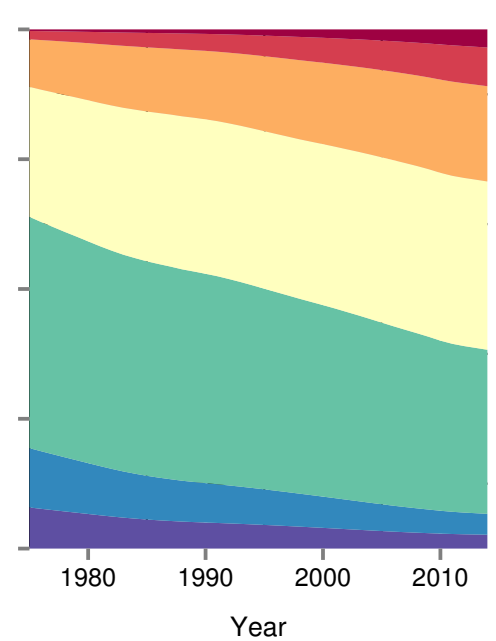

■ BMI <18.5 ■ BMI 18.5-20 ■ BMI 20-25 ■ BMI 25-30 ■ BMI 30-35 ■ BMI 35-40 ■ BMI ≥ 40

Taiwan  
East Asia

Men

Women

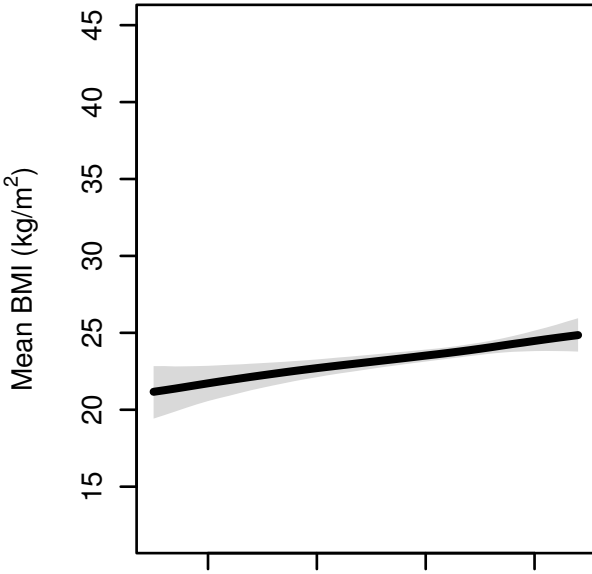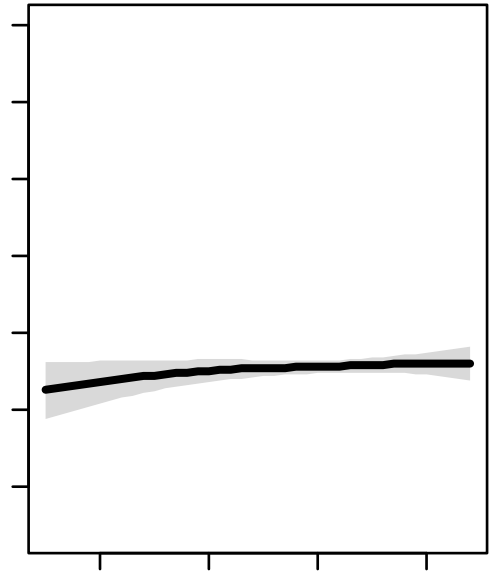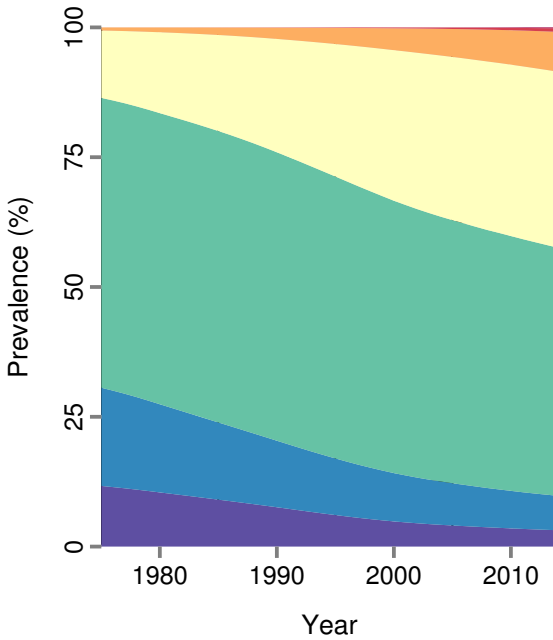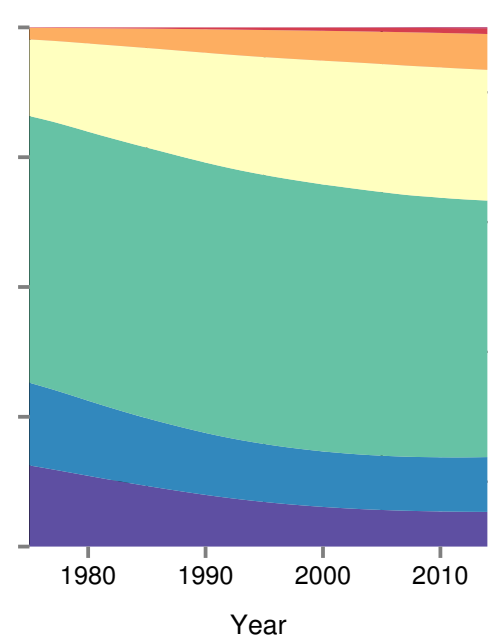

■ BMI <18.5 ■ BMI 18.5-20 ■ BMI 20-25 ■ BMI 25-30 ■ BMI 30-35 ■ BMI 35-40 ■ BMI ≥ 40

Tajikistan  
Central Asia

Men

Women

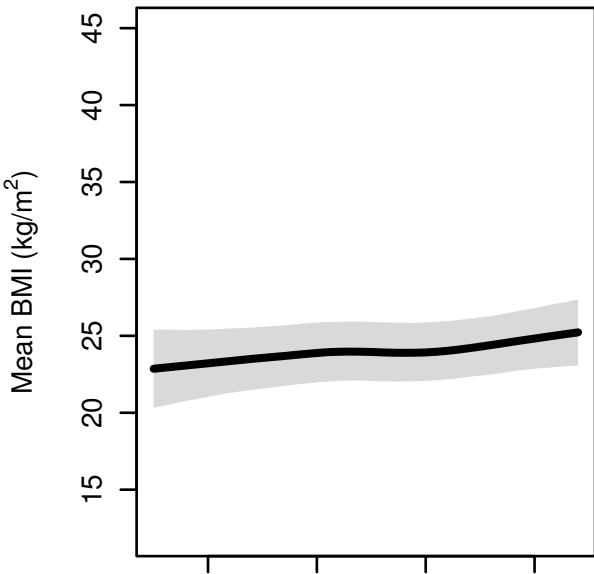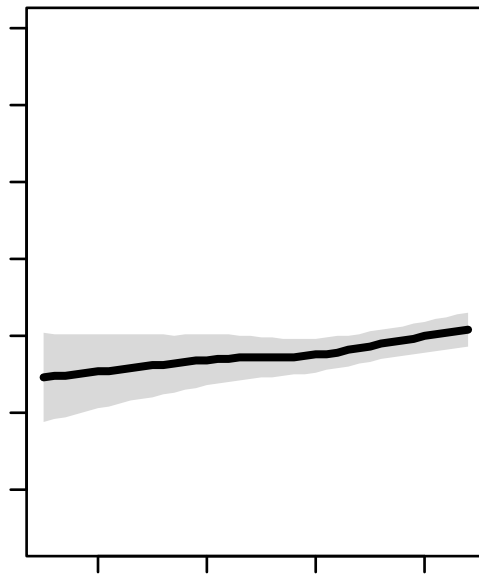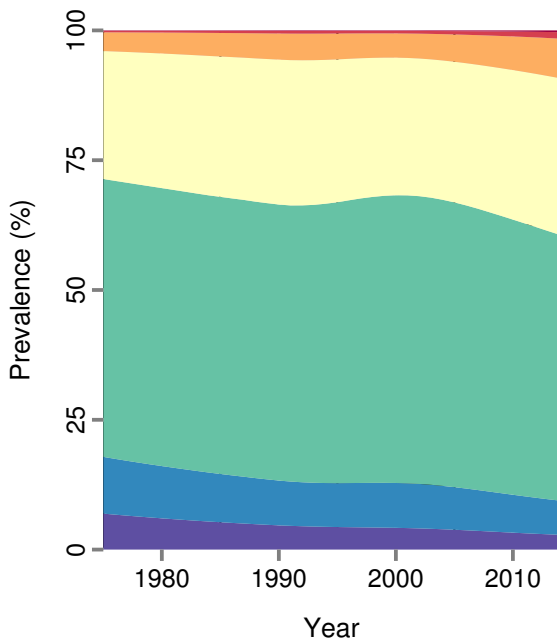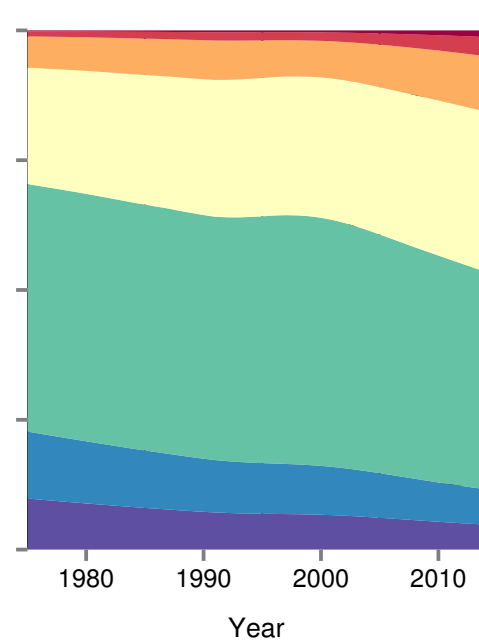

■ BMI <18.5 ■ BMI 18.5-20 ■ BMI 20-25 ■ BMI 25-30 ■ BMI 30-35 ■ BMI 35-40 ■ BMI ≥ 40

Tanzania  
East Africa

Men

Women

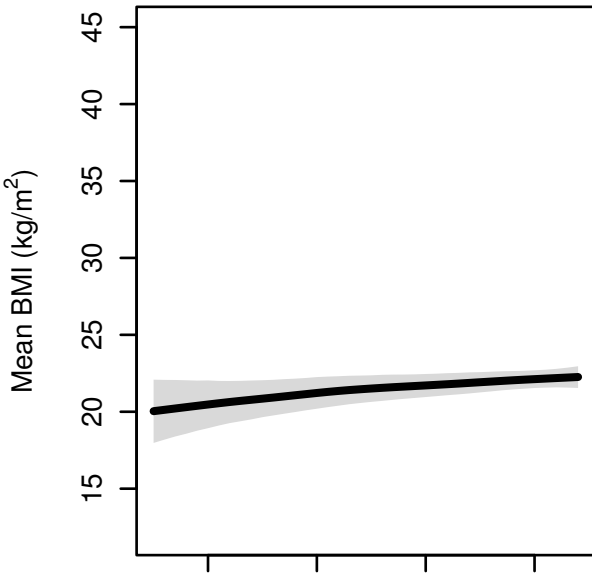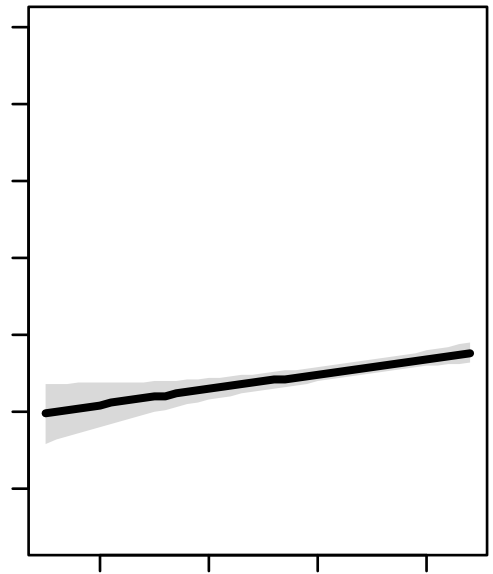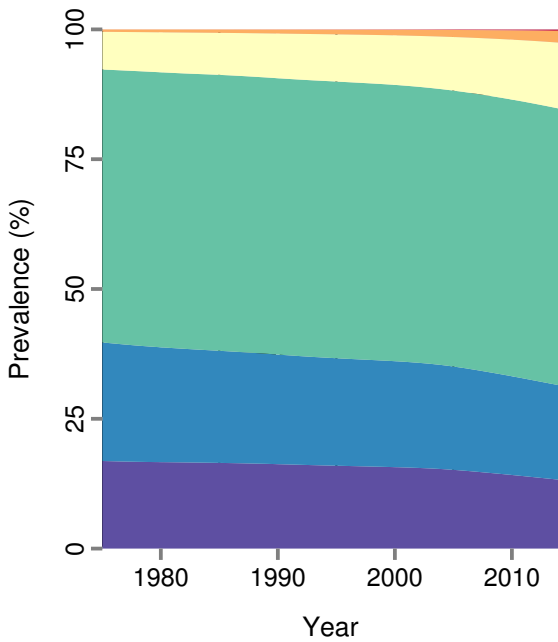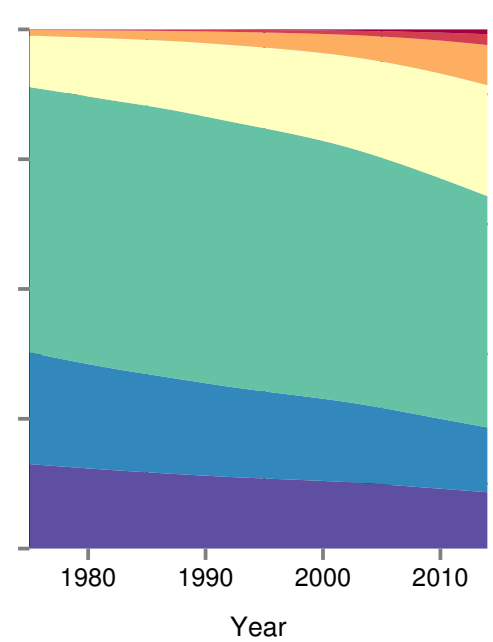

■ BMI <18.5 ■ BMI 18.5-20 ■ BMI 20-25 ■ BMI 25-30 ■ BMI 30-35 ■ BMI 35-40 ■ BMI ≥ 40

Thailand  
South East Asia

Men

Women

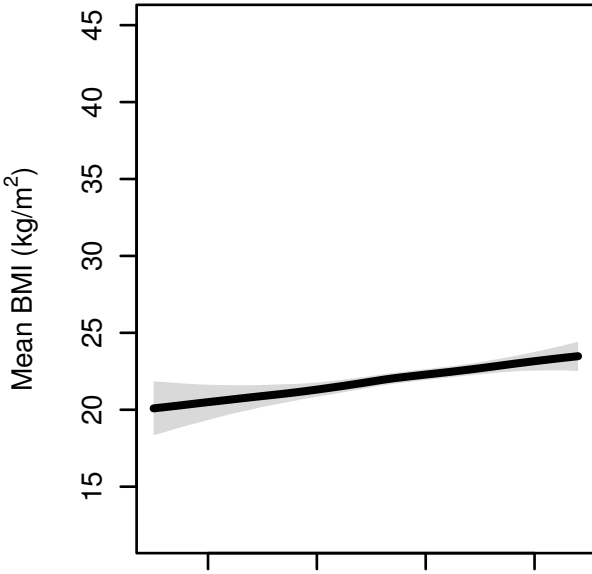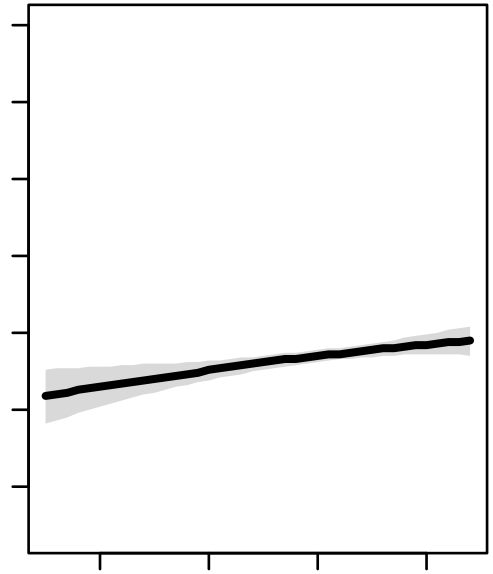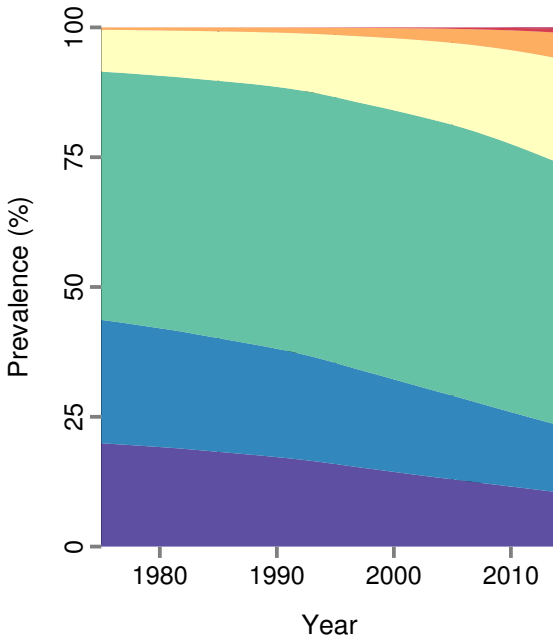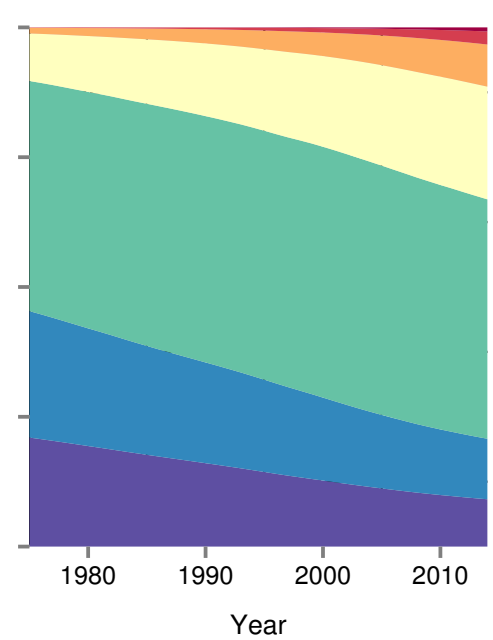

■ BMI <18.5 ■ BMI 18.5-20 ■ BMI 20-25 ■ BMI 25-30 ■ BMI 30-35 ■ BMI 35-40 ■ BMI ≥ 40

Timor-Leste  
South East Asia

Men

Women

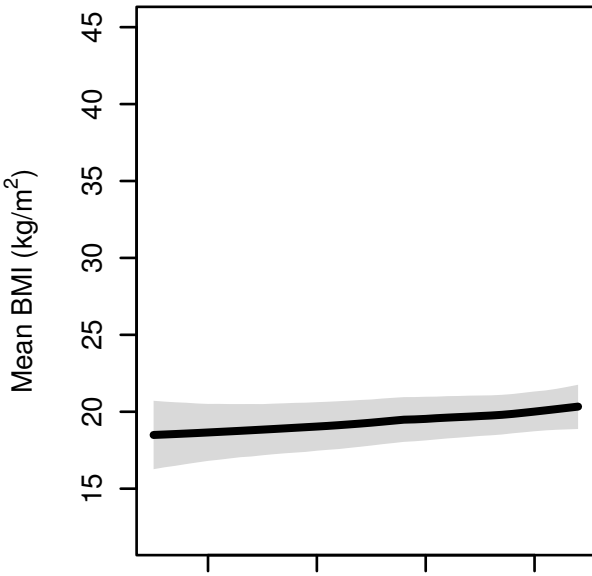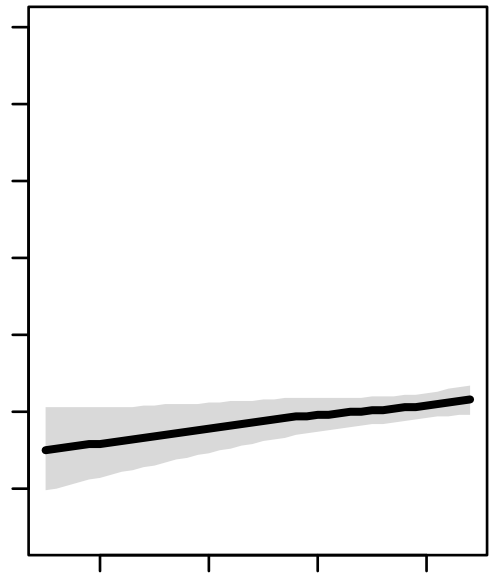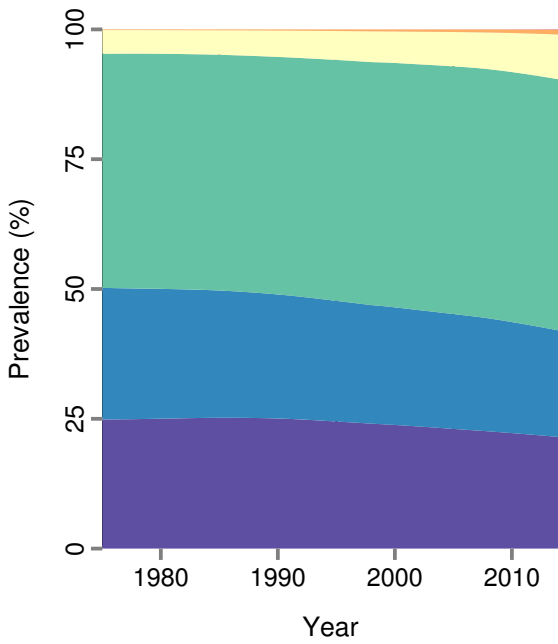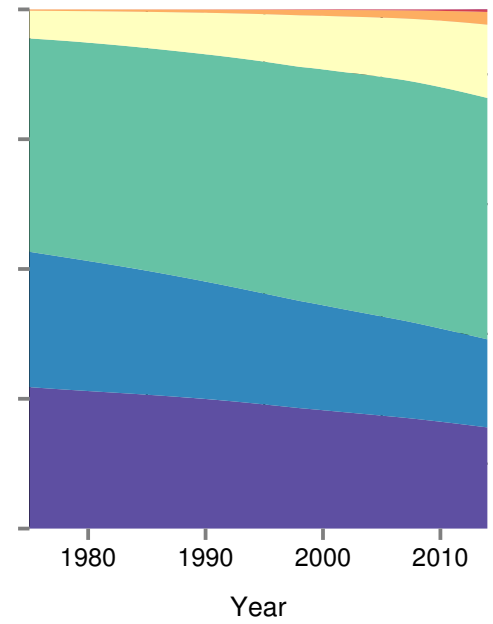

■ BMI <18.5 ■ BMI 18.5-20 ■ BMI 20-25 ■ BMI 25-30 ■ BMI 30-35 ■ BMI 35-40 ■ BMI ≥ 40



Togo  
West Africa

Men

Women

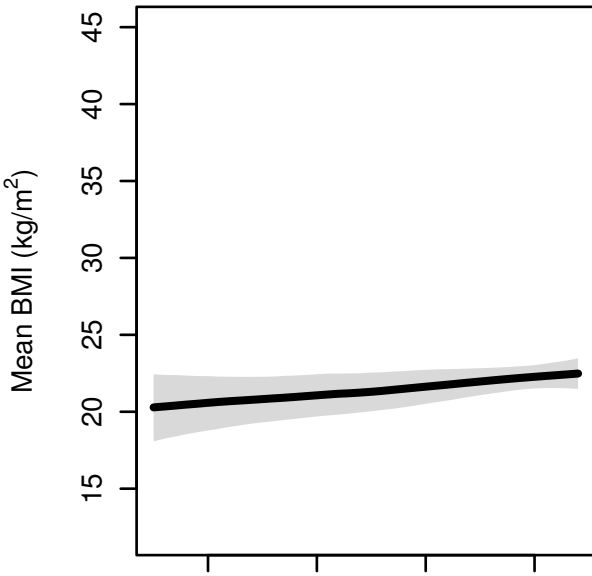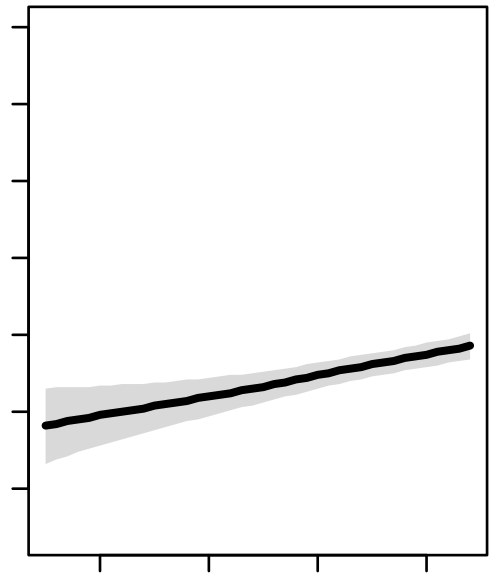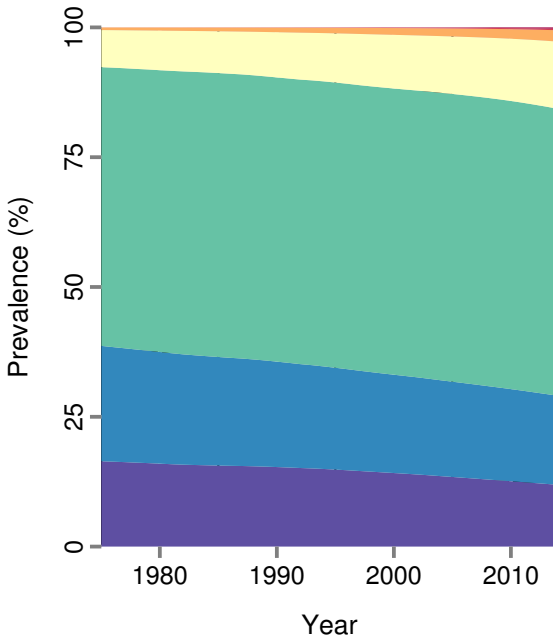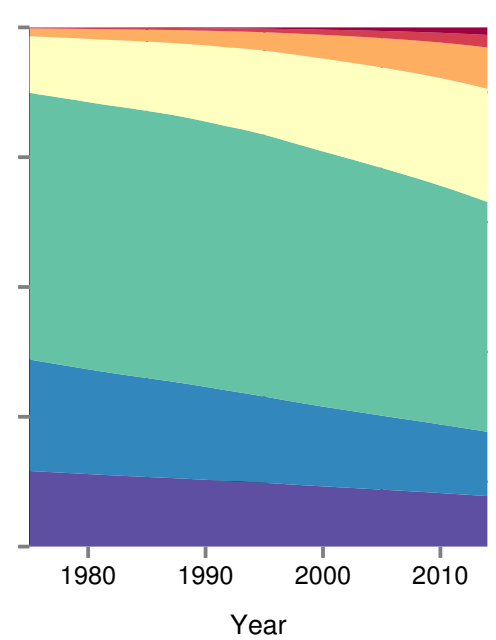

■ BMI <18.5 ■ BMI 18.5-20 ■ BMI 20-25 ■ BMI 25-30 ■ BMI 30-35 ■ BMI 35-40 ■ BMI ≥ 40

Tokelau  
Polynesia and Micronesia

Men

Women

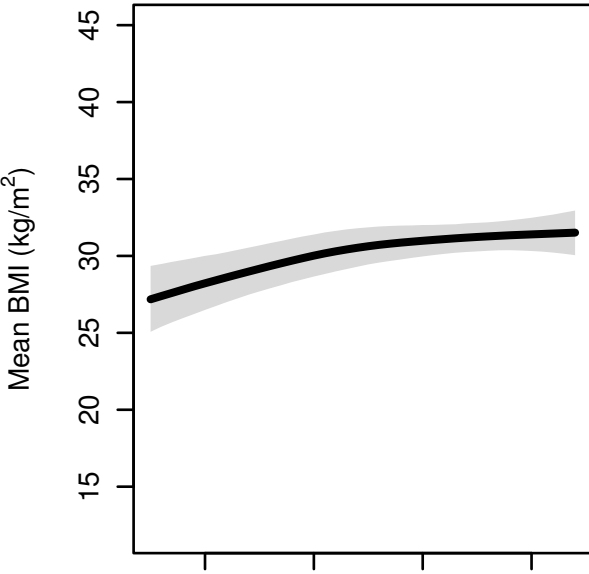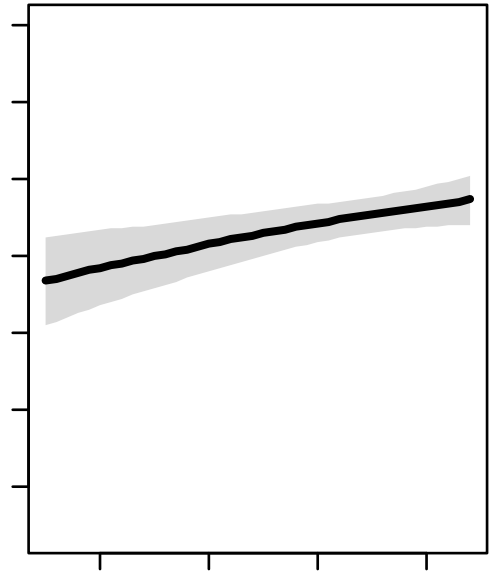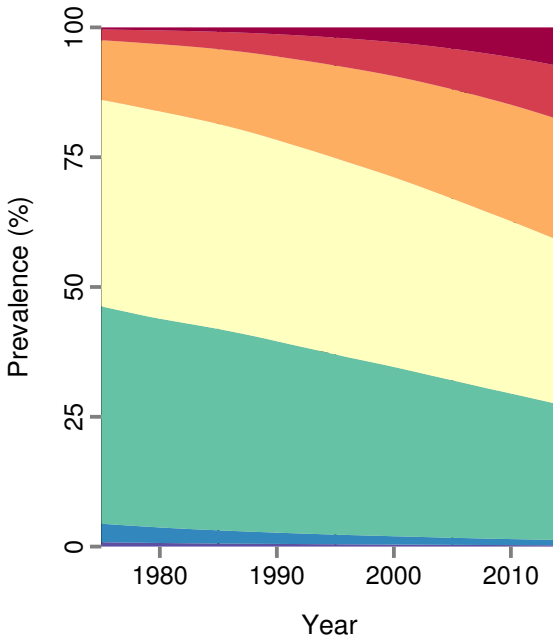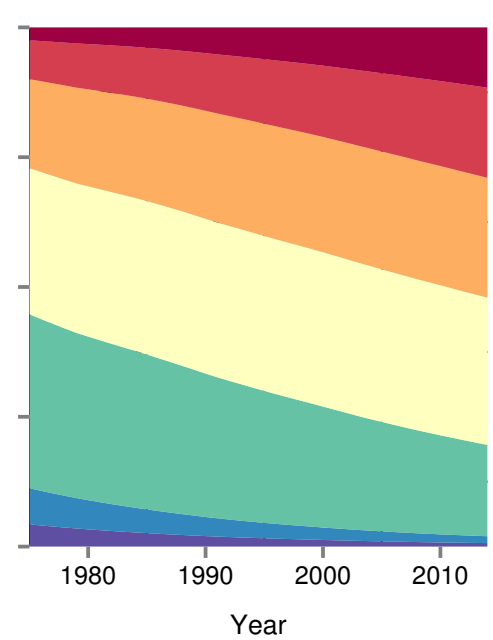

■ BMI <18.5 ■ BMI 18.5-20 ■ BMI 20-25 ■ BMI 25-30 ■ BMI 30-35 ■ BMI 35-40 ■ BMI ≥ 40

Tonga  
Polynesia and Micronesia

Men

Women

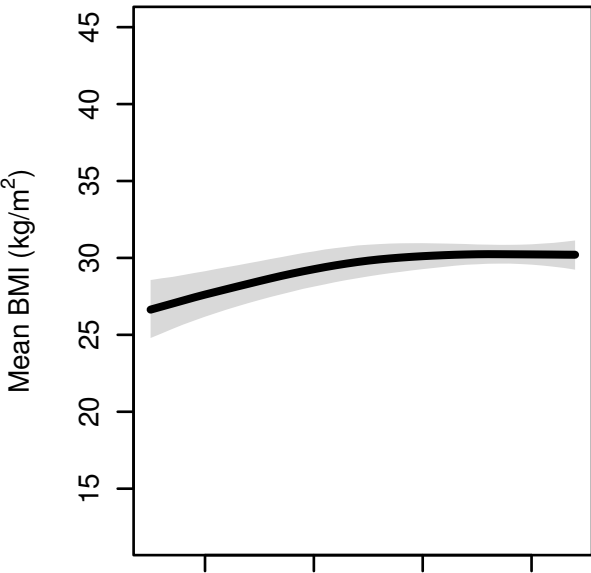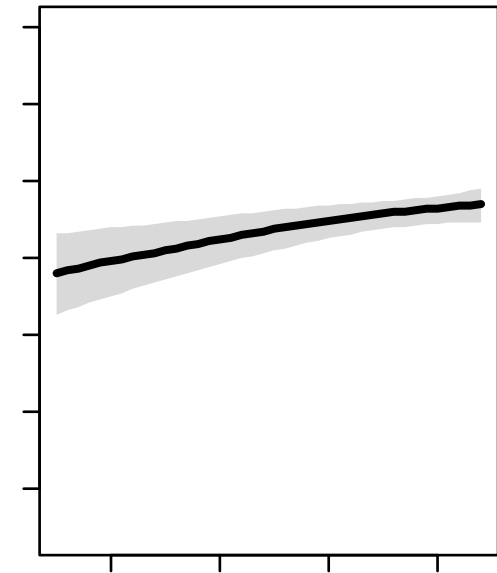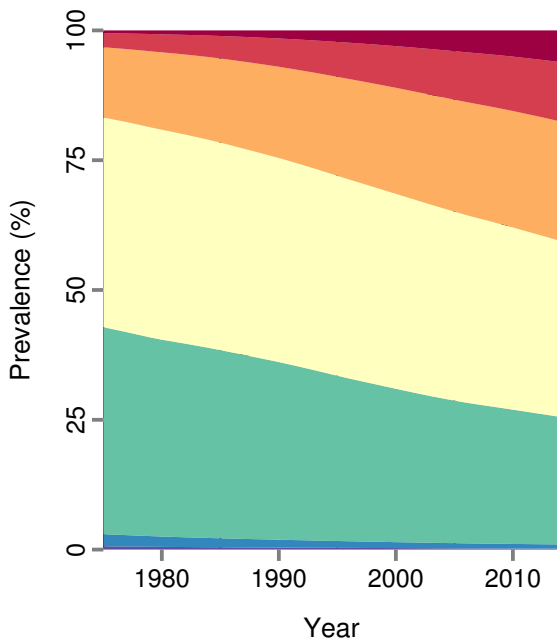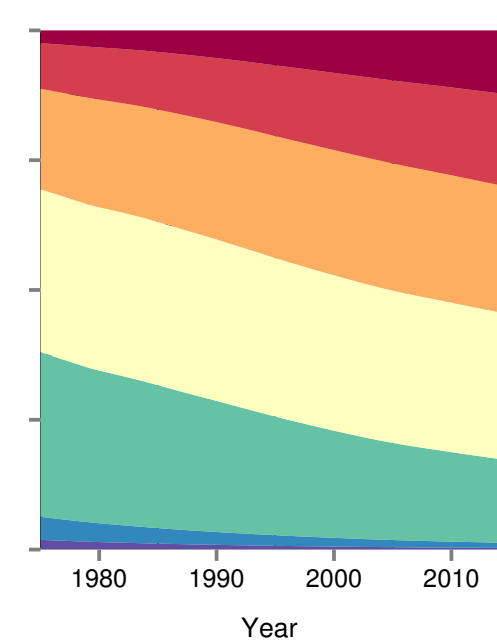

■ BMI <18.5 ■ BMI 18.5-20 ■ BMI 20-25 ■ BMI 25-30 ■ BMI 30-35 ■ BMI 35-40 ■ BMI ≥ 40

Trinidad and Tobago  
Caribbean

Men

Women

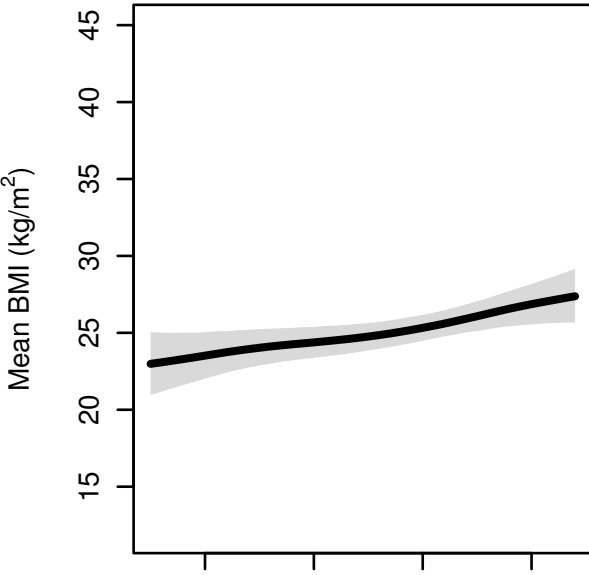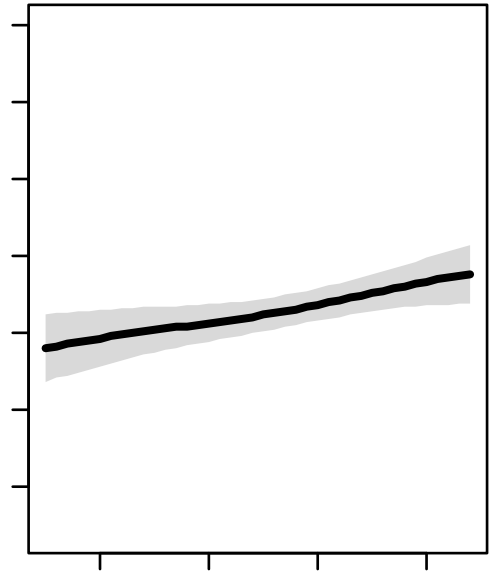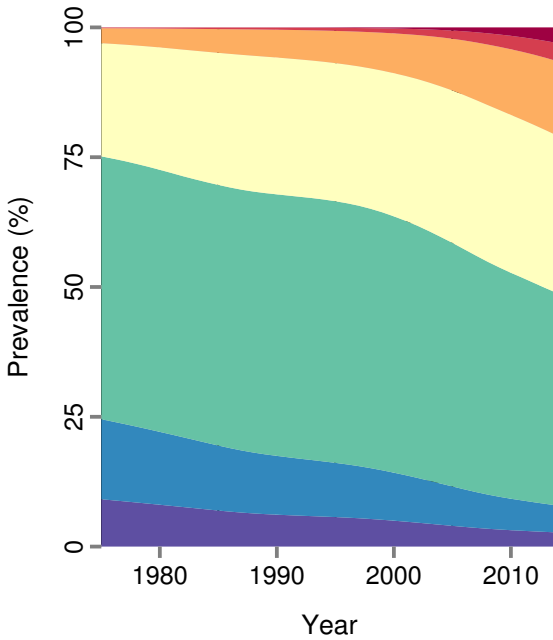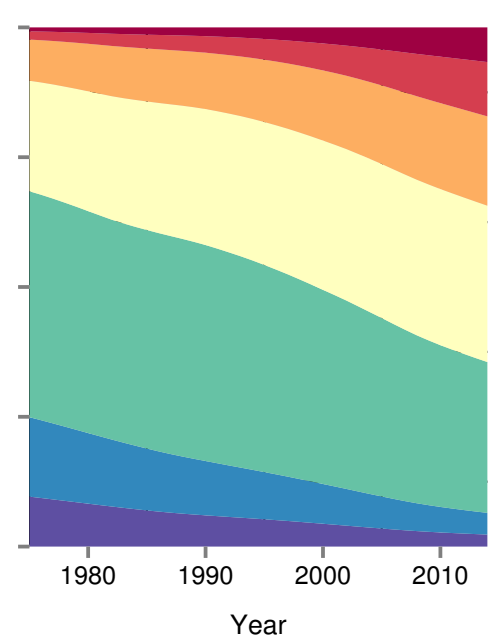

■ BMI <18.5 ■ BMI 18.5-20 ■ BMI 20-25 ■ BMI 25-30 ■ BMI 30-35 ■ BMI 35-40 ■ BMI ≥ 40

# Tunisia

Middle East and North Africa

## Men

## Women

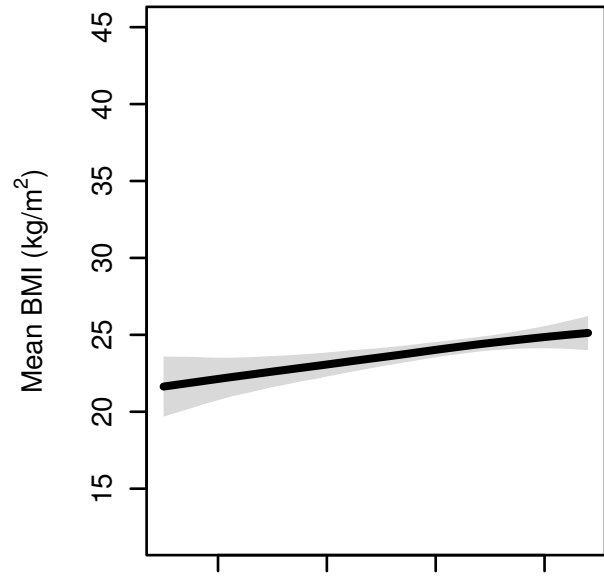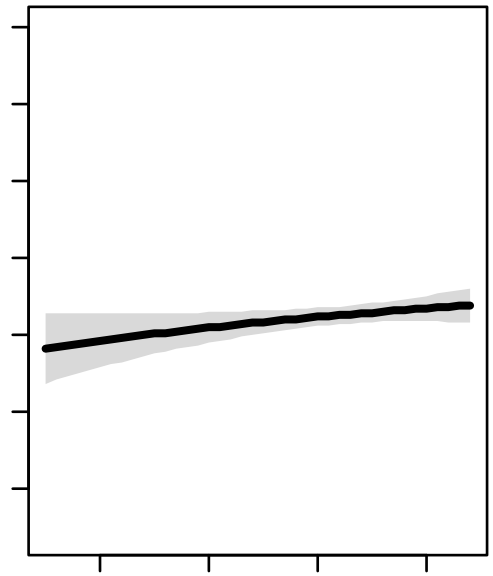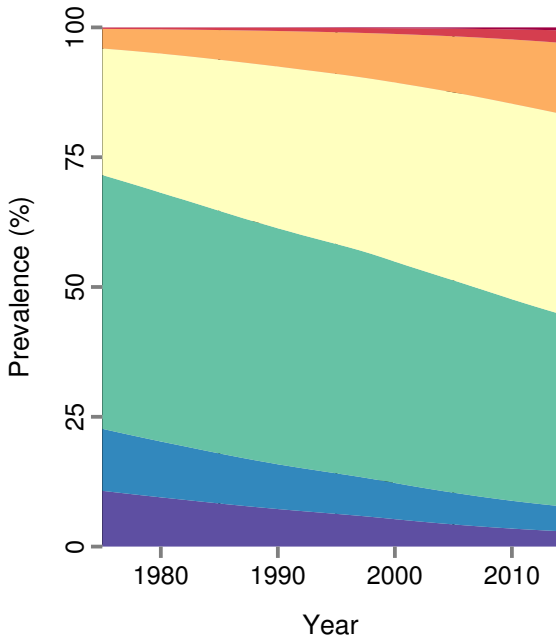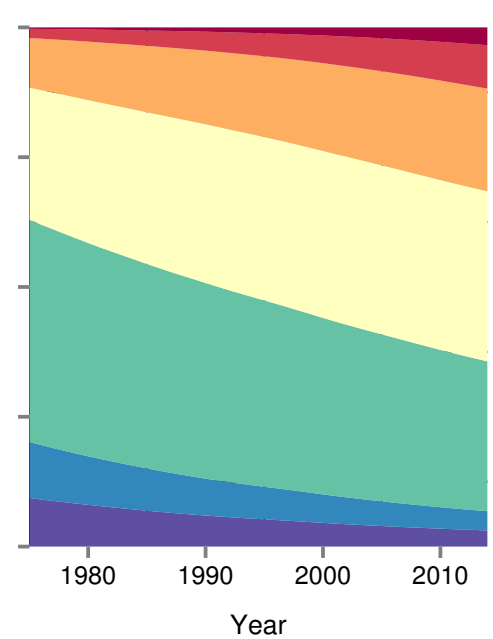

■ BMI <18.5 ■ BMI 18.5-20 ■ BMI 20-25 ■ BMI 25-30 ■ BMI 30-35 ■ BMI 35-40 ■ BMI ≥ 40

Turkey  
Middle East and North Africa

Men

Women

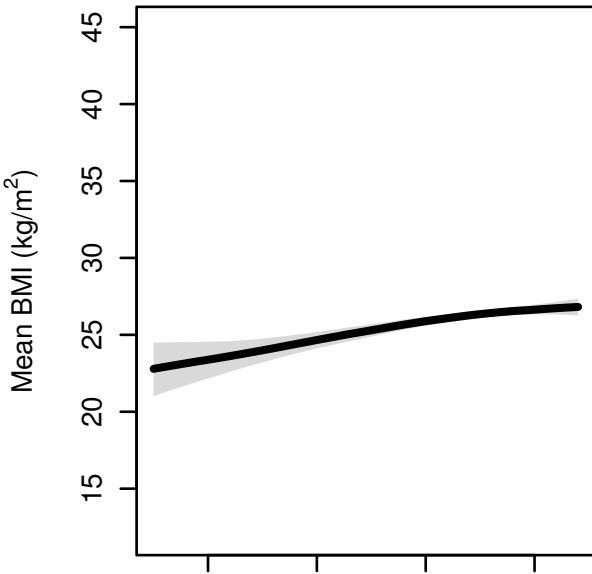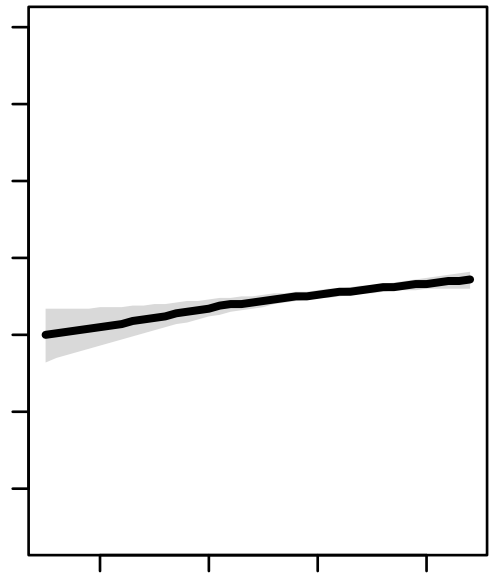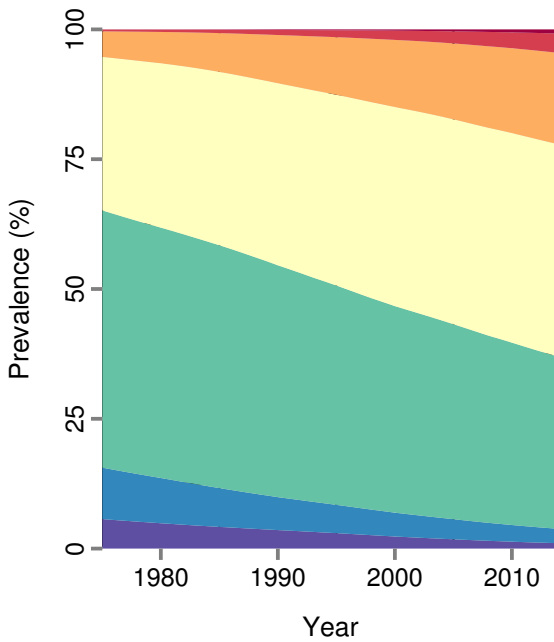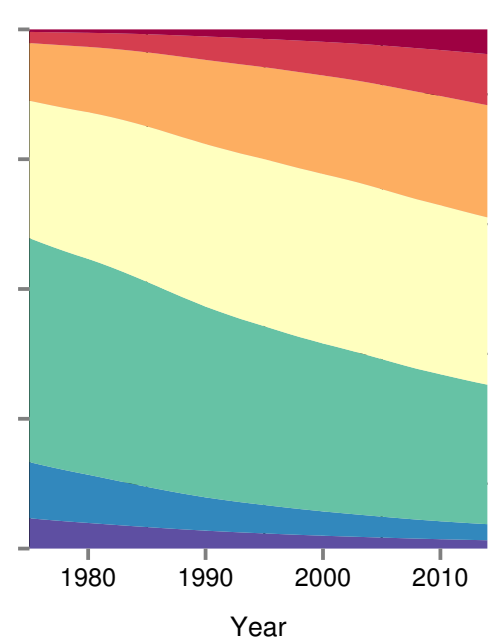

■ BMI <18.5 ■ BMI 18.5-20 ■ BMI 20-25 ■ BMI 25-30 ■ BMI 30-35 ■ BMI 35-40 ■ BMI ≥ 40

Turkmenistan  
Central Asia

Men

Women

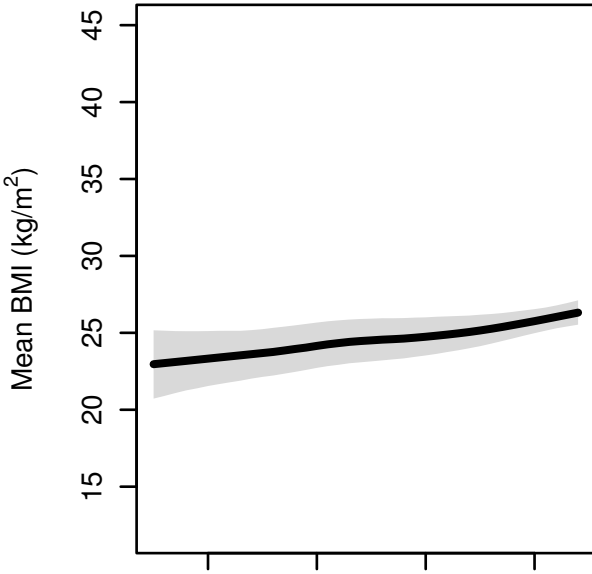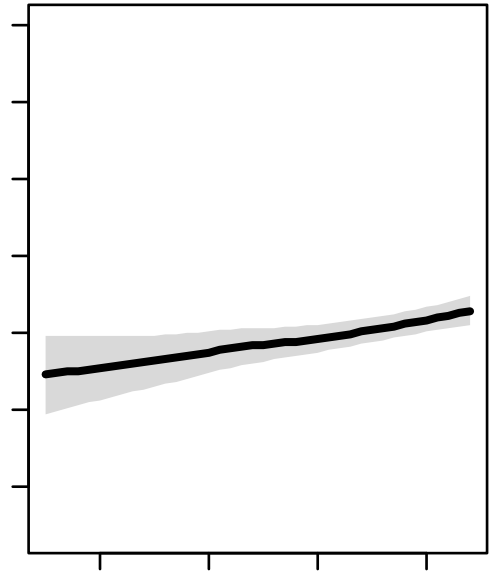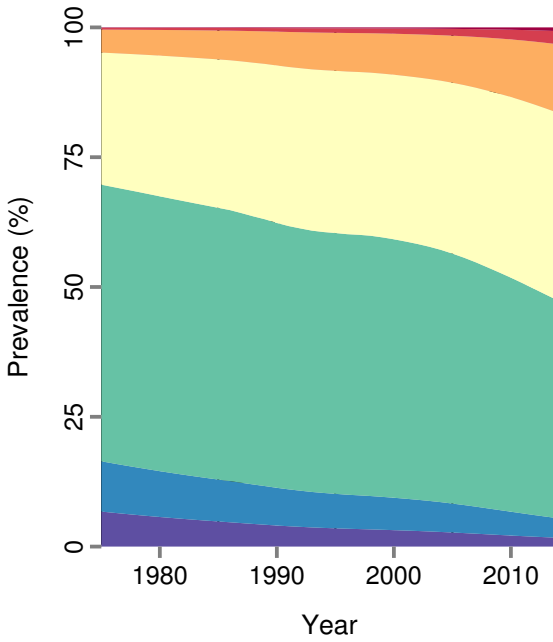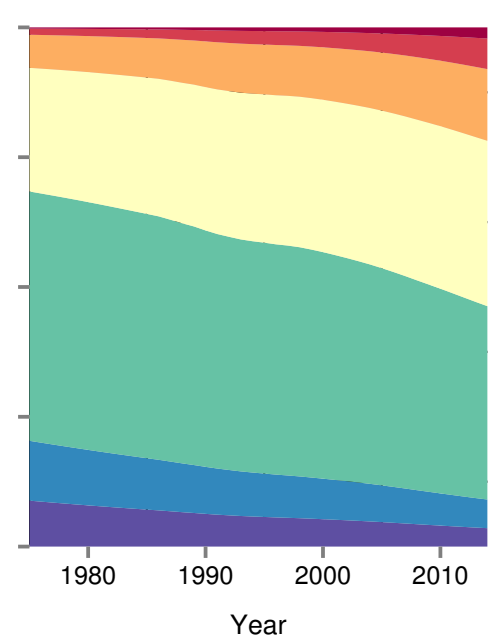

■ BMI <18.5 ■ BMI 18.5-20 ■ BMI 20-25 ■ BMI 25-30 ■ BMI 30-35 ■ BMI 35-40 ■ BMI ≥ 40

Tuvalu  
Polynesia and Micronesia

Men

Women

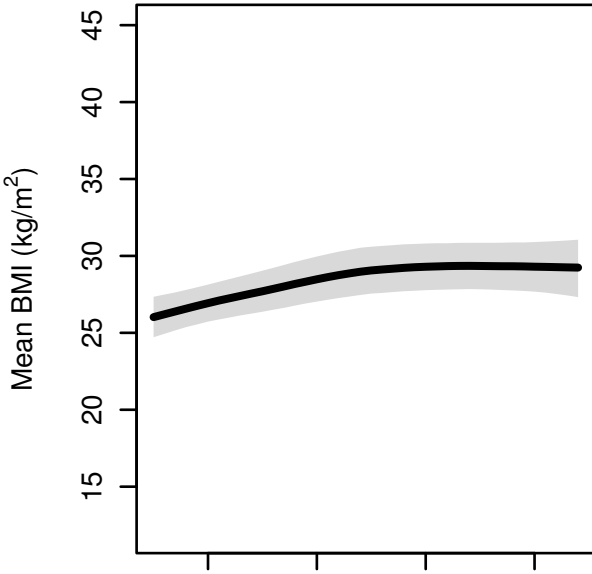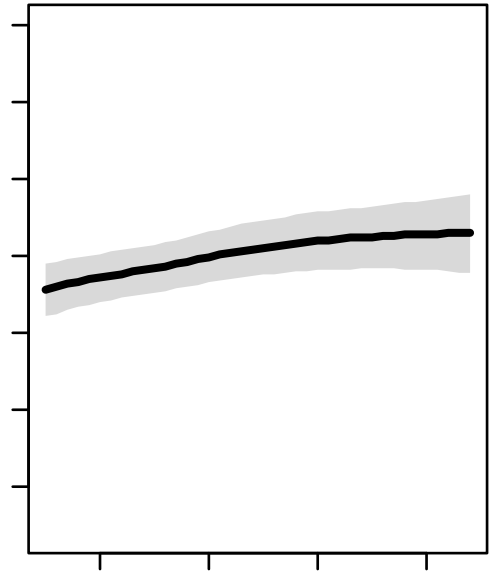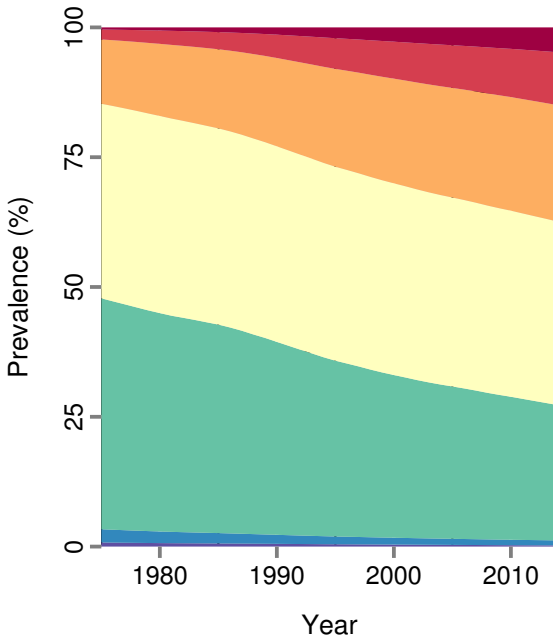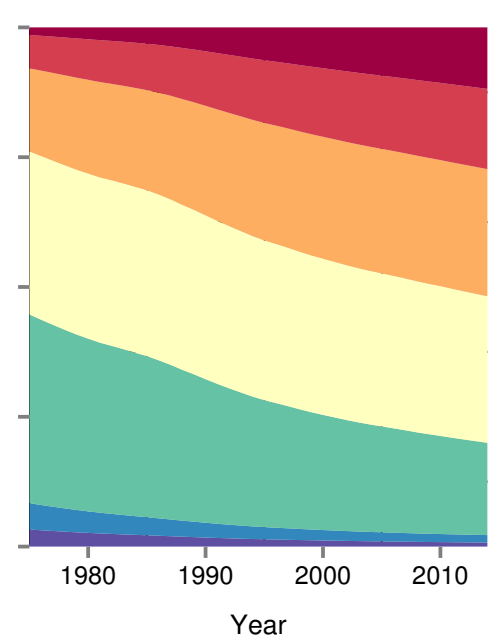

■ BMI <18.5 ■ BMI 18.5-20 ■ BMI 20-25 ■ BMI 25-30 ■ BMI 30-35 ■ BMI 35-40 ■ BMI ≥ 40



Uganda  
East Africa

Men

Women

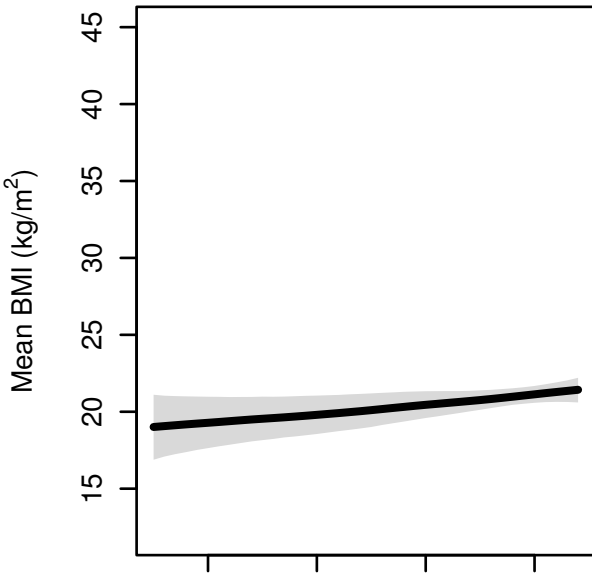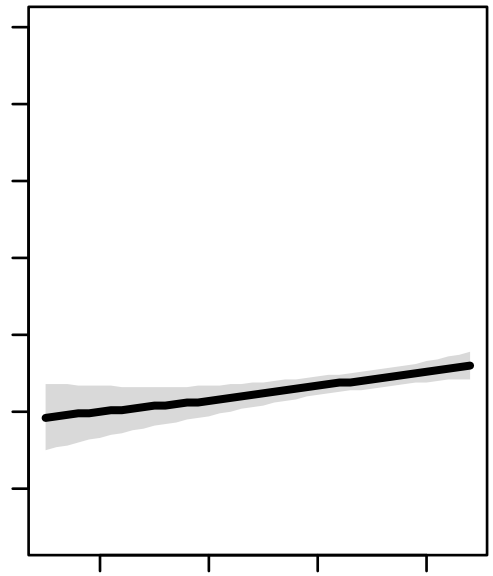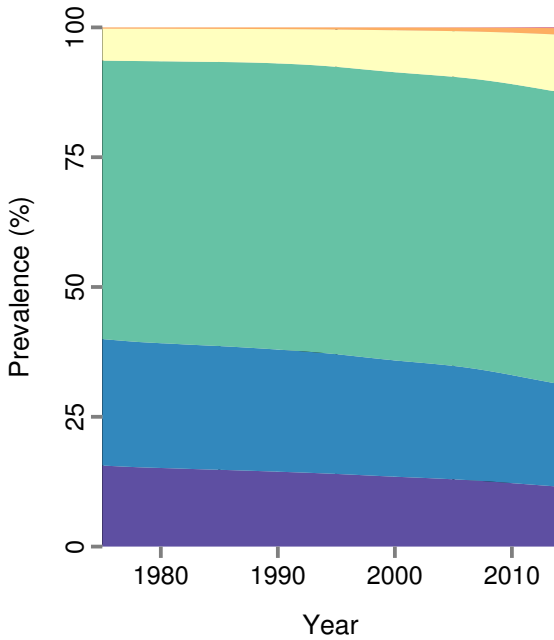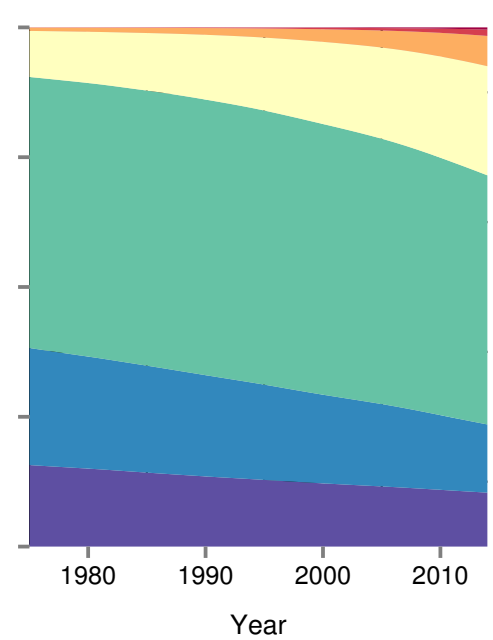

■ BMI <18.5 ■ BMI 18.5-20 ■ BMI 20-25 ■ BMI 25-30 ■ BMI 30-35 ■ BMI 35-40 ■ BMI ≥ 40

Ukraine  
Eastern Europe

Men

Women

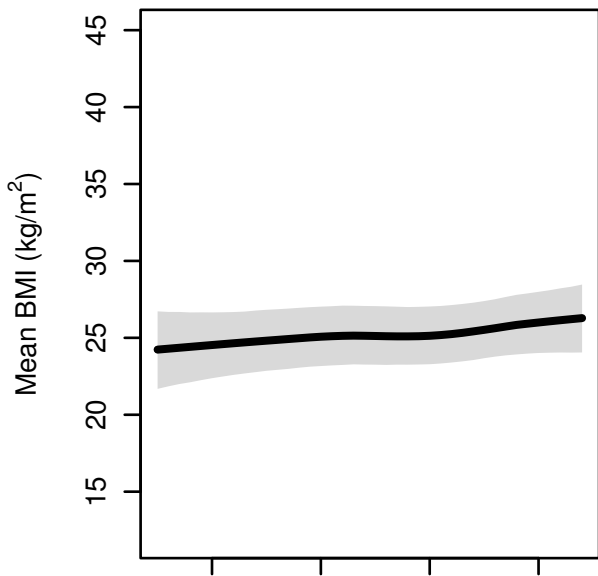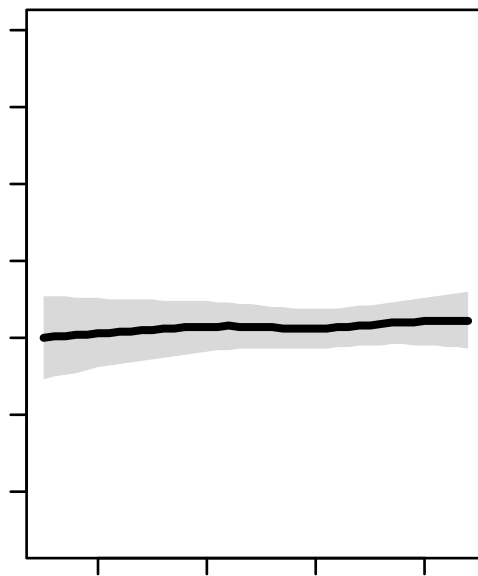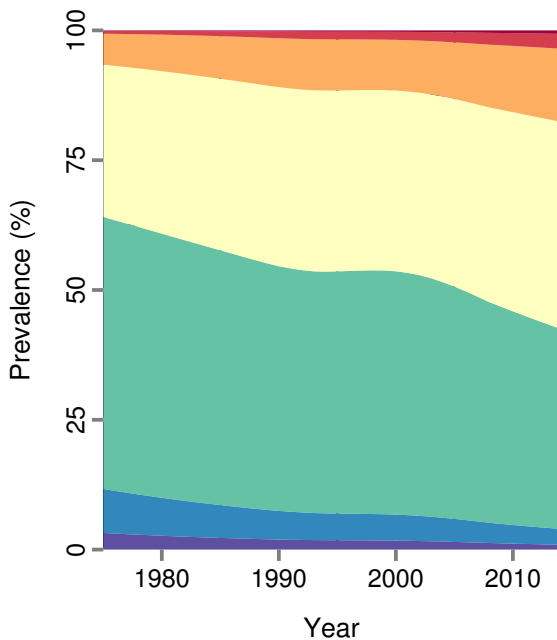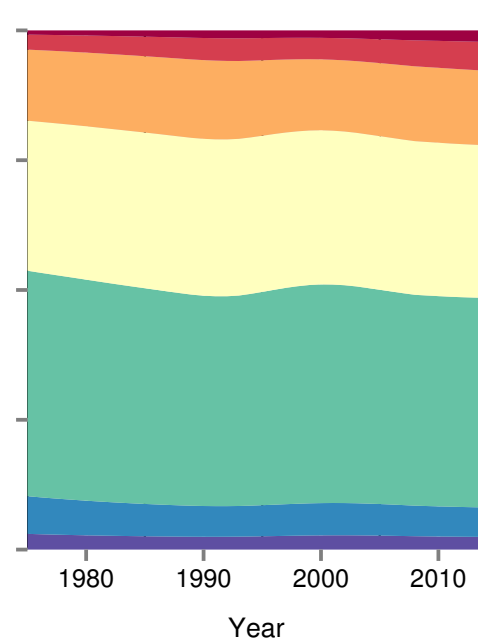

■ BMI <18.5 ■ BMI 18.5-20 ■ BMI 20-25 ■ BMI 25-30 ■ BMI 30-35 ■ BMI 35-40 ■ BMI ≥ 40

# United Arab Emirates

## Middle East and North Africa

### Men

### Women

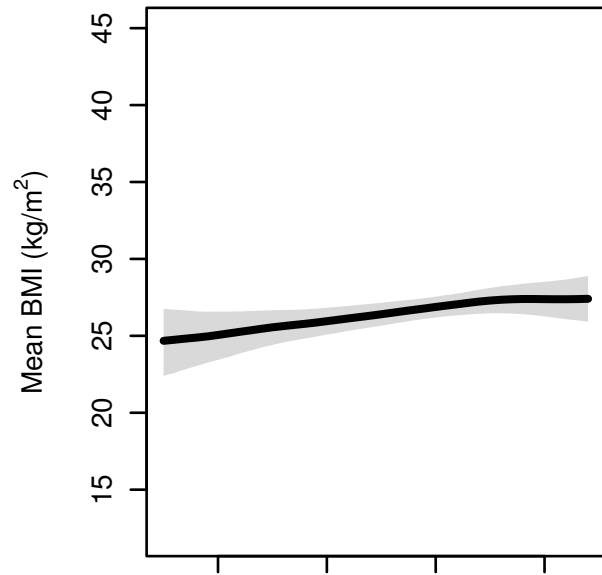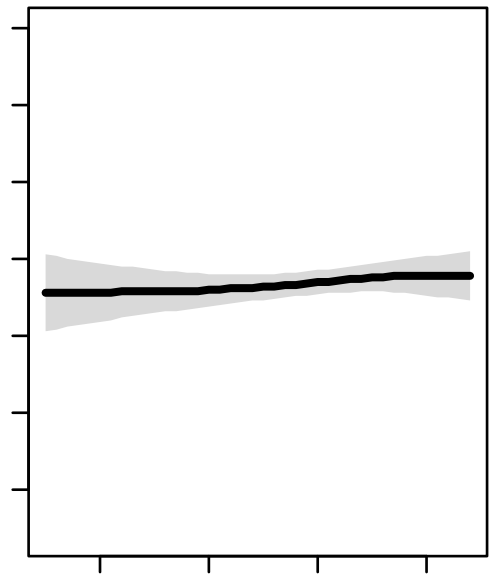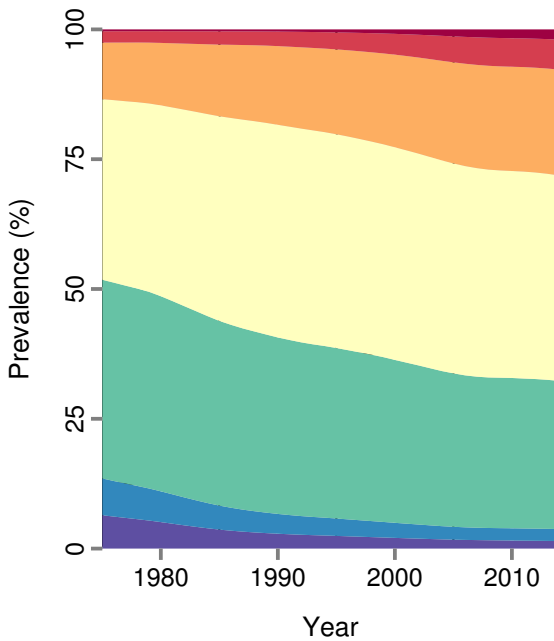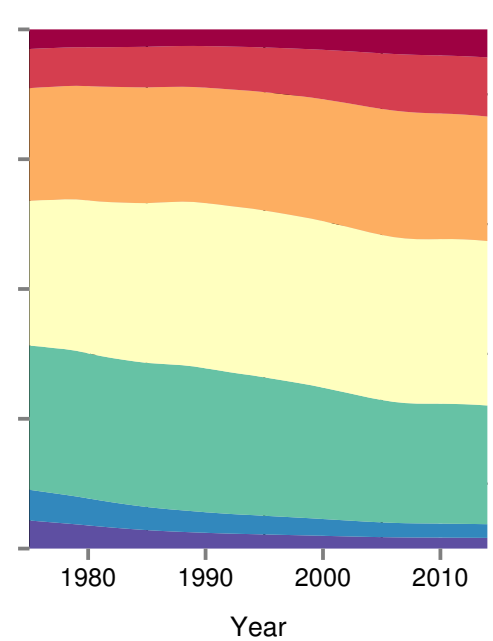

■ BMI <18.5 ■ BMI 18.5-20 ■ BMI 20-25 ■ BMI 25-30 ■ BMI 30-35 ■ BMI 35-40 ■ BMI ≥ 40

United Kingdom  
High-income English-speaking countries

Men

Women

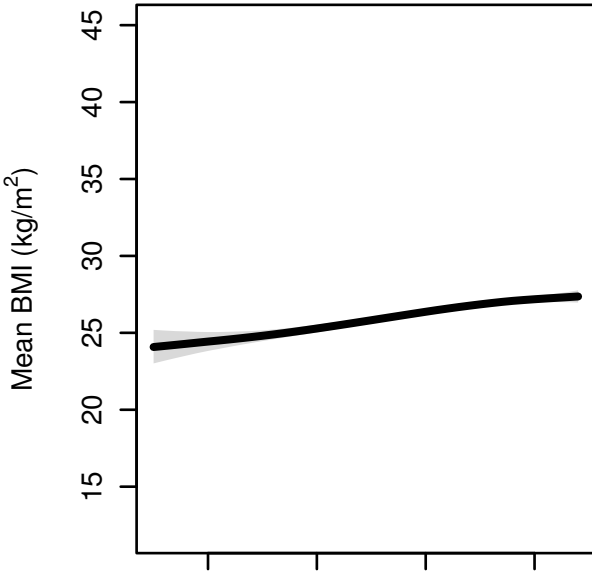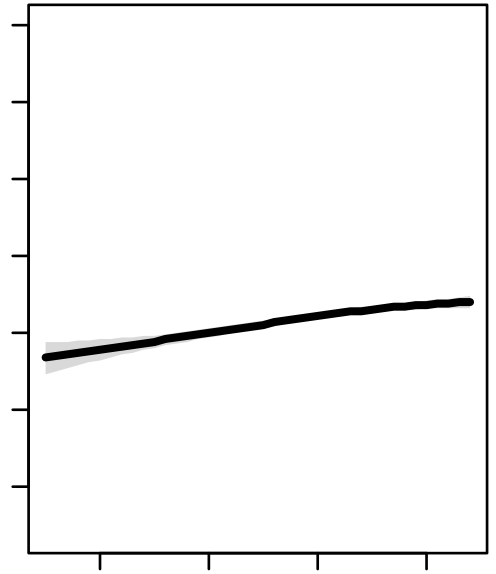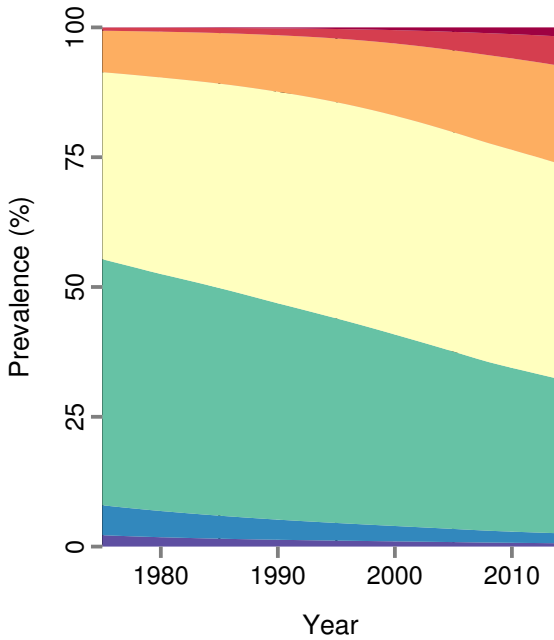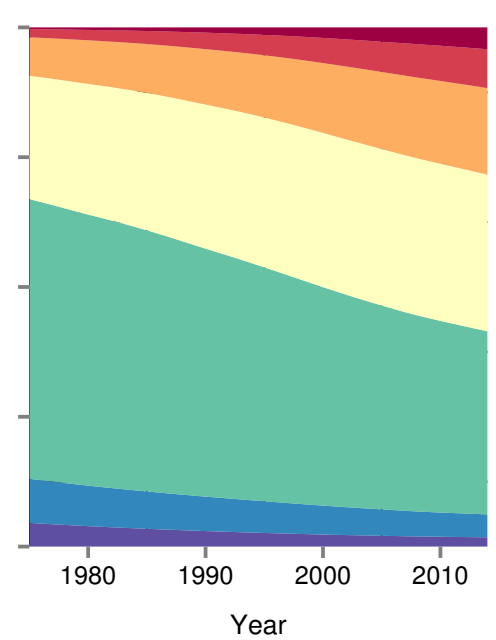

■ BMI <18.5 ■ BMI 18.5-20 ■ BMI 20-25 ■ BMI 25-30 ■ BMI 30-35 ■ BMI 35-40 ■ BMI ≥ 40

United States of America  
High-income English-speaking countries

Men

Women

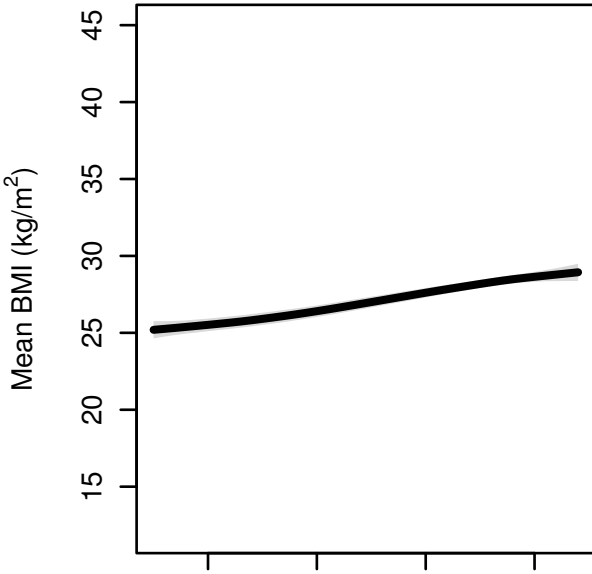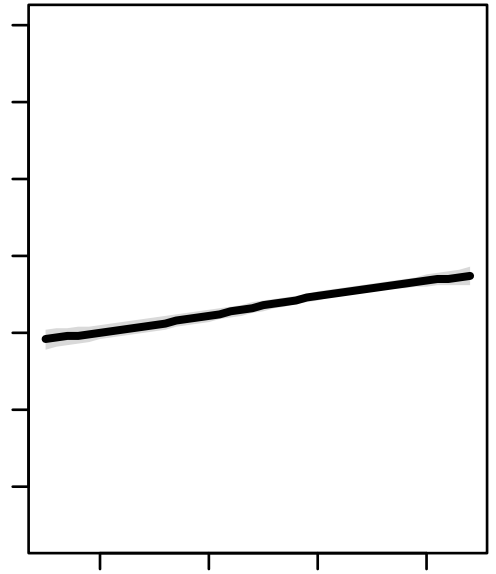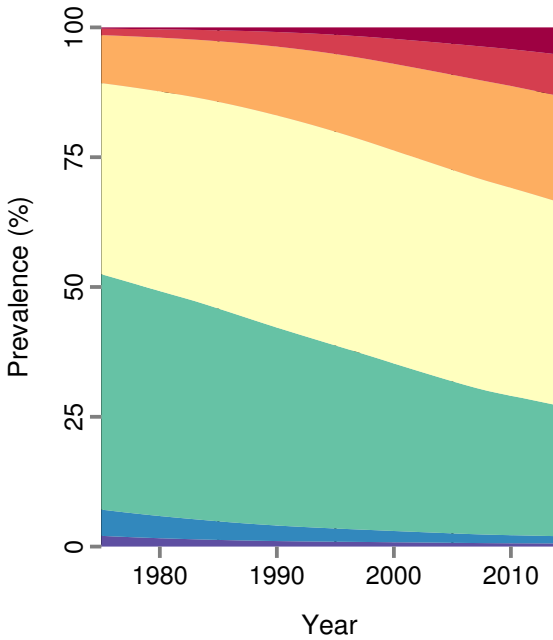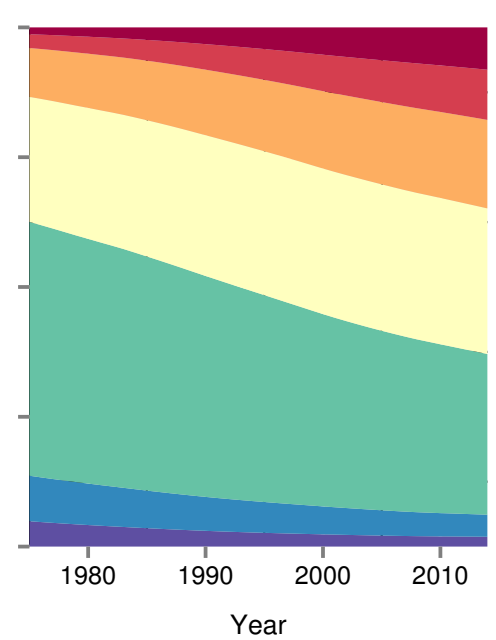

■ BMI <18.5 ■ BMI 18.5-20 ■ BMI 20-25 ■ BMI 25-30 ■ BMI 30-35 ■ BMI 35-40 ■ BMI ≥ 40

Uruguay  
Southern Latin America

Men

Women

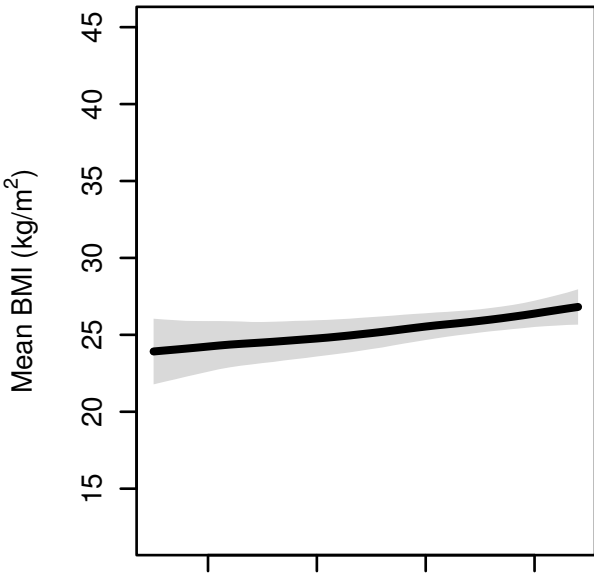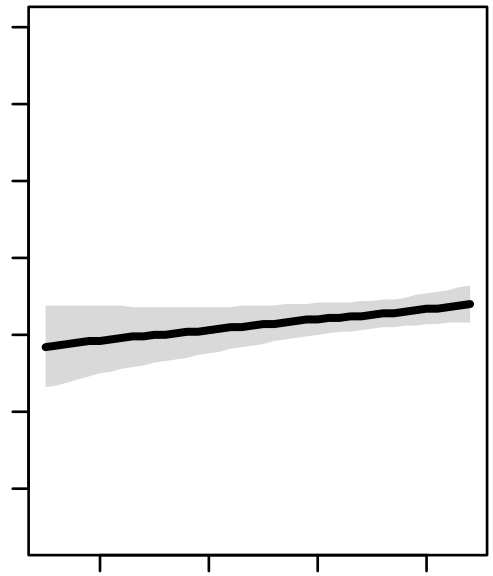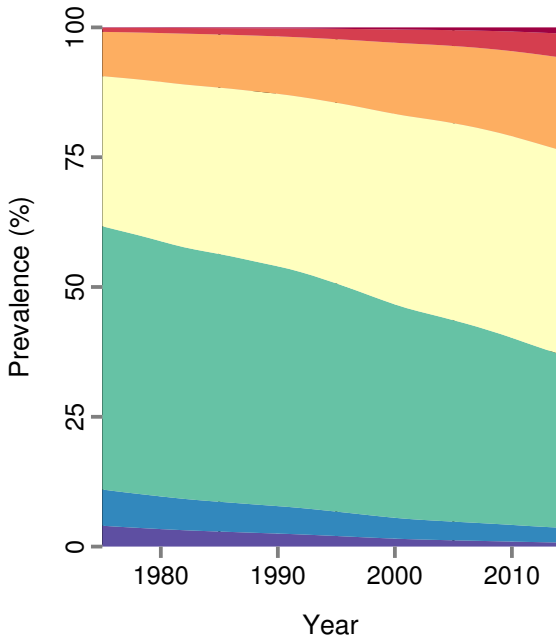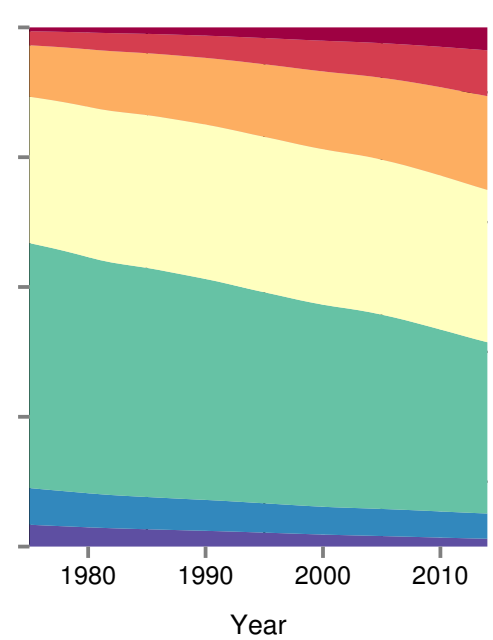

■ BMI <18.5 ■ BMI 18.5-20 ■ BMI 20-25 ■ BMI 25-30 ■ BMI 30-35 ■ BMI 35-40 ■ BMI ≥ 40

Uzbekistan  
Central Asia

Men

Women

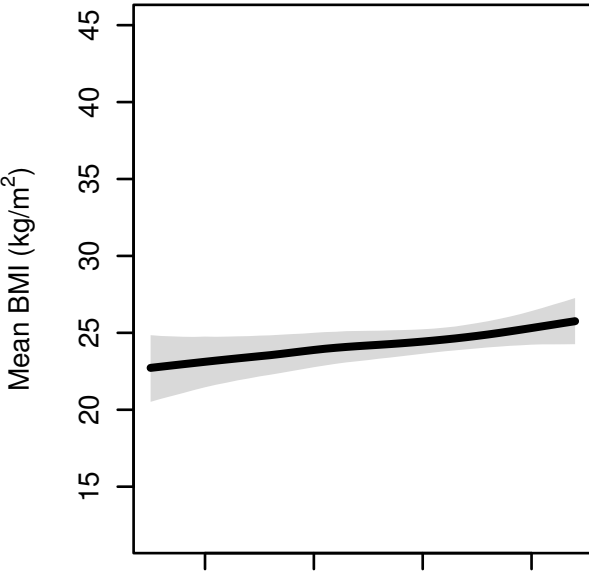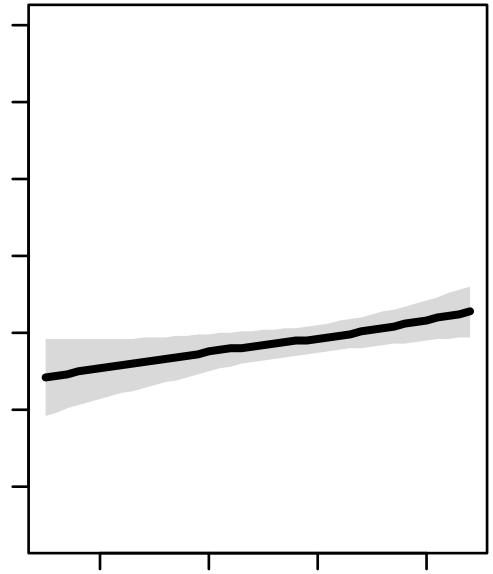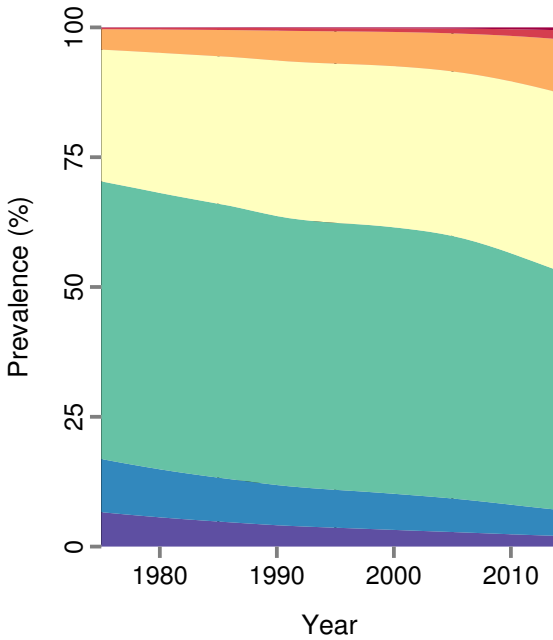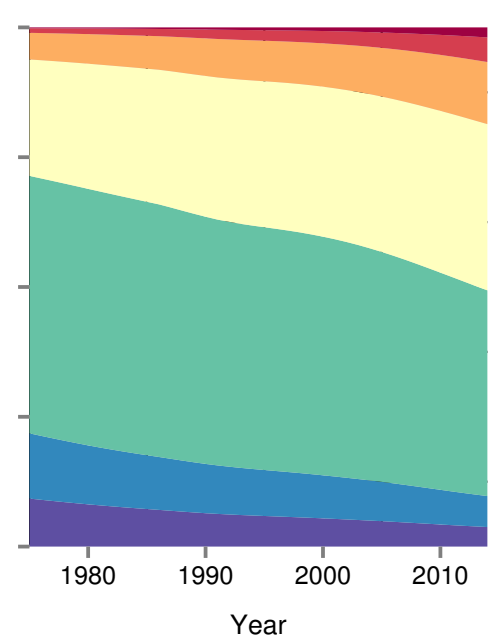

■ BMI <18.5 ■ BMI 18.5-20 ■ BMI 20-25 ■ BMI 25-30 ■ BMI 30-35 ■ BMI 35-40 ■ BMI ≥ 40

Vanuatu  
Melanesia

Men

Women

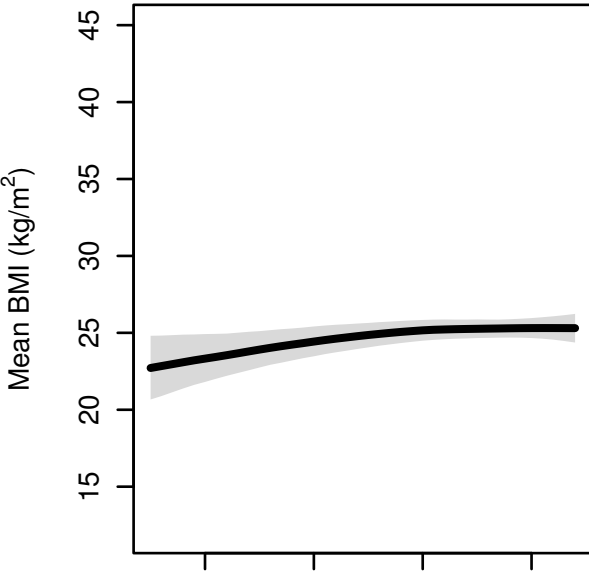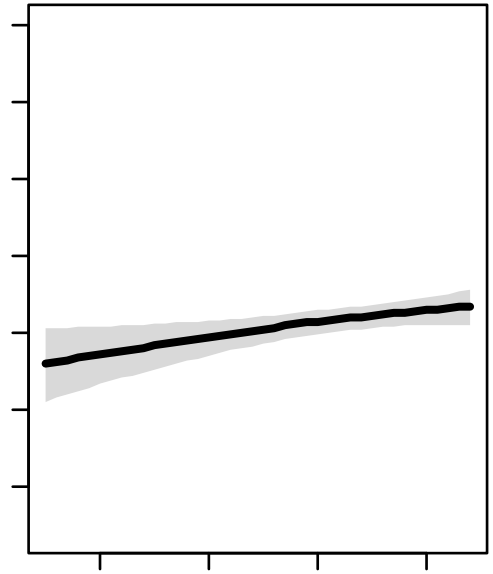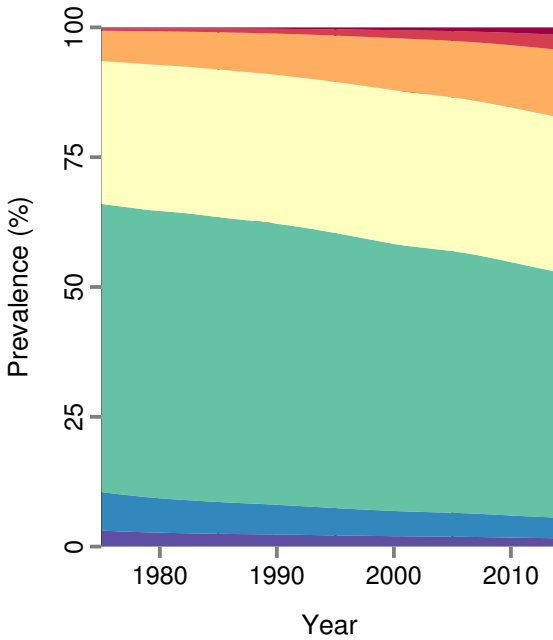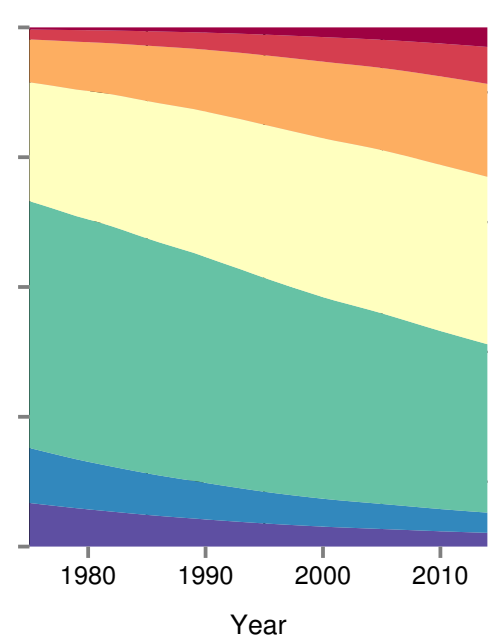

■ BMI <18.5 ■ BMI 18.5-20 ■ BMI 20-25 ■ BMI 25-30 ■ BMI 30-35 ■ BMI 35-40 ■ BMI ≥ 40



Venezuela  
Central Latin America

Men

Women

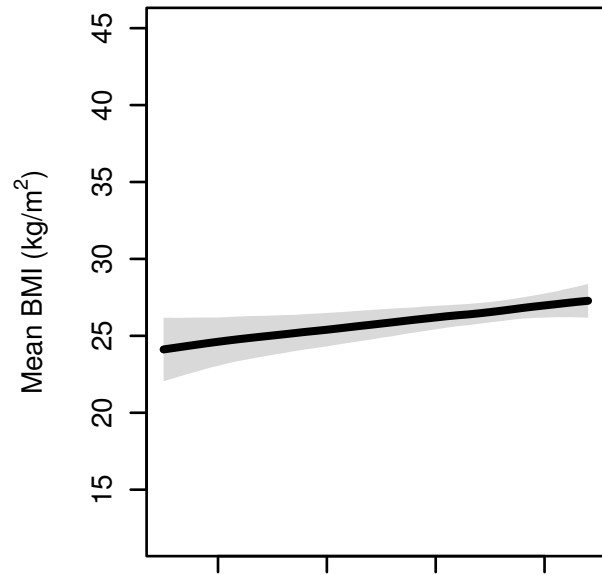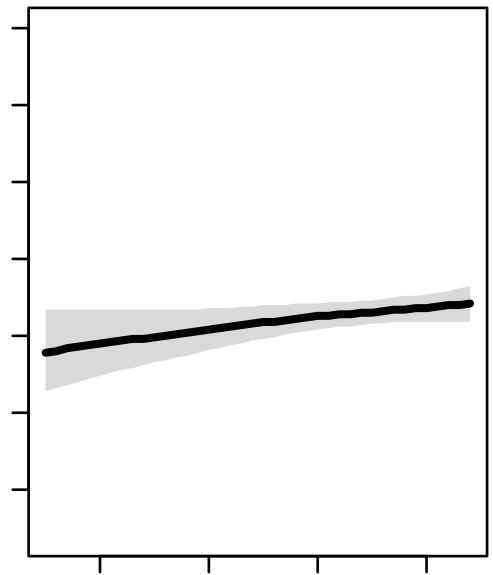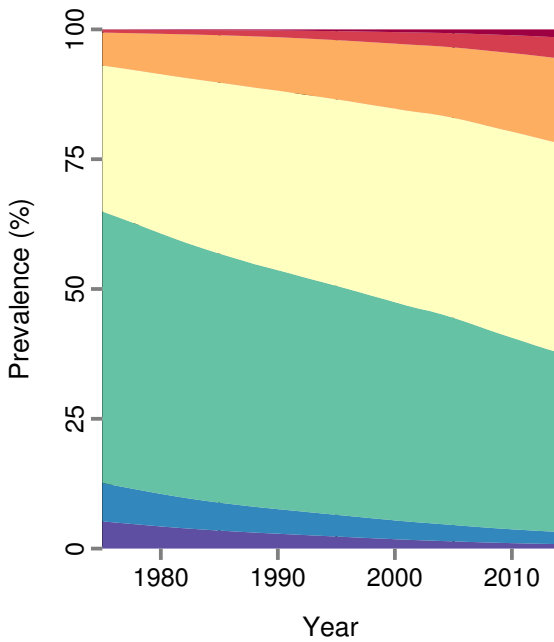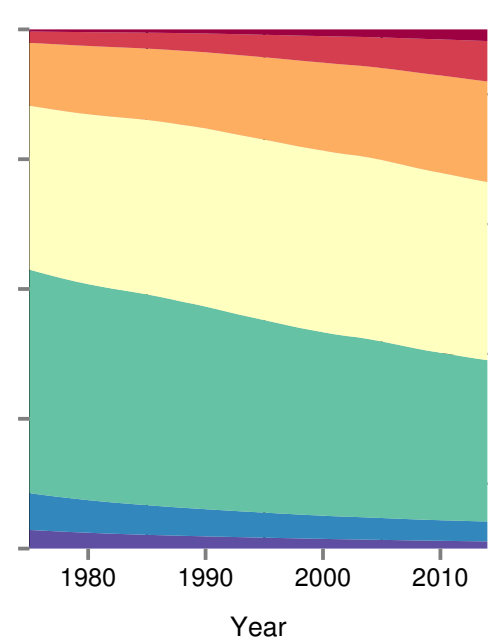

■ BMI <18.5 ■ BMI 18.5-20 ■ BMI 20-25 ■ BMI 25-30 ■ BMI 30-35 ■ BMI 35-40 ■ BMI ≥ 40

Viet Nam  
South East Asia

Men

Women

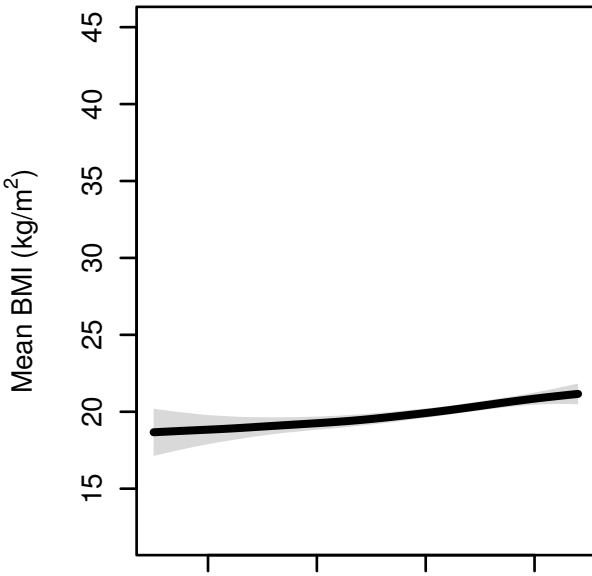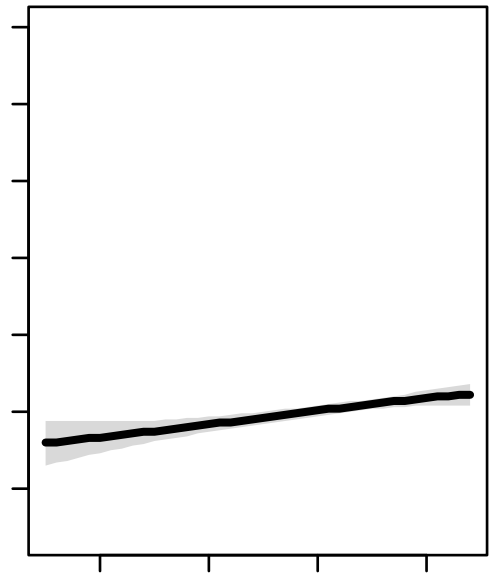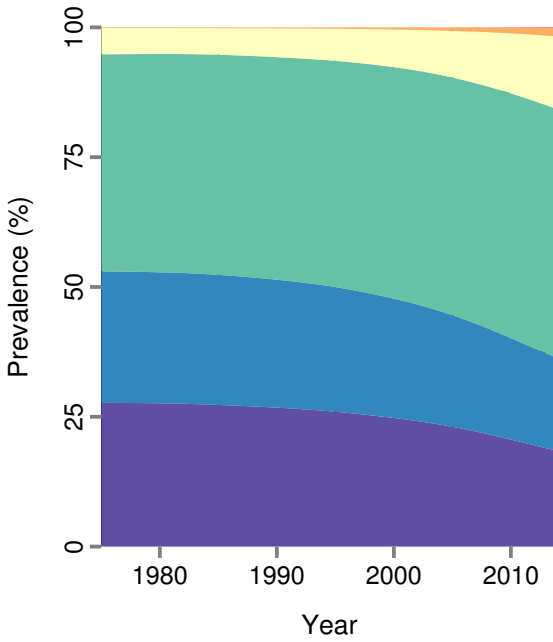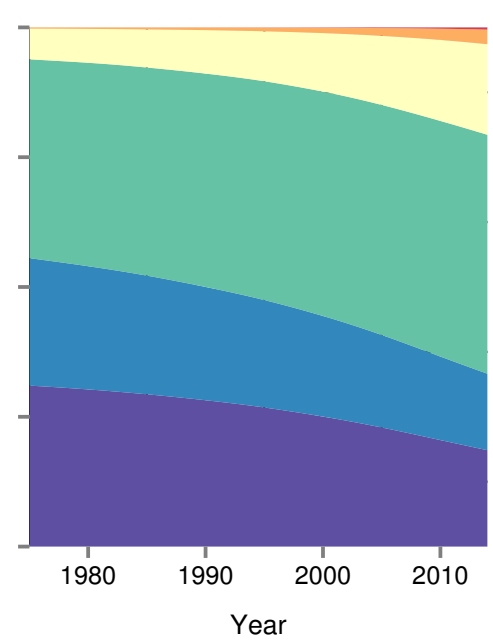

■ BMI <18.5 ■ BMI 18.5-20 ■ BMI 20-25 ■ BMI 25-30 ■ BMI 30-35 ■ BMI 35-40 ■ BMI ≥ 40

# Yemen

Middle East and North Africa

## Men

## Women

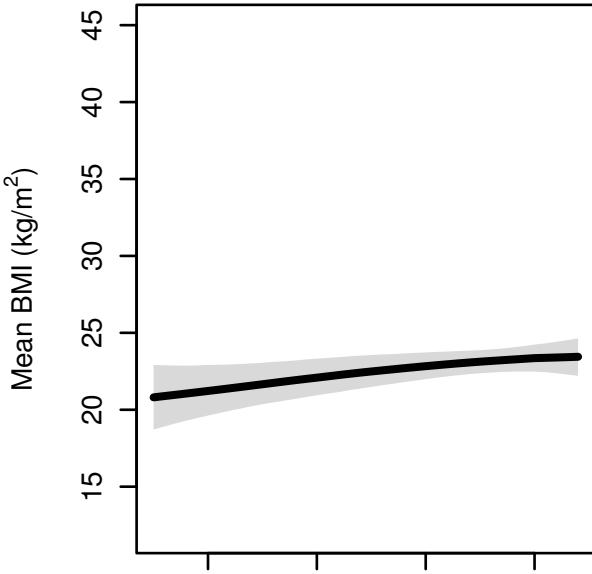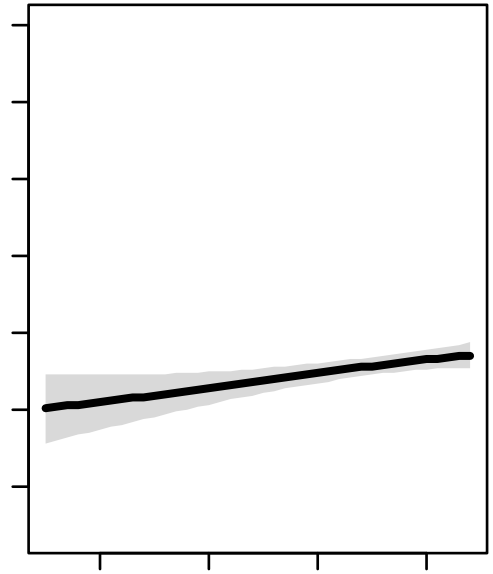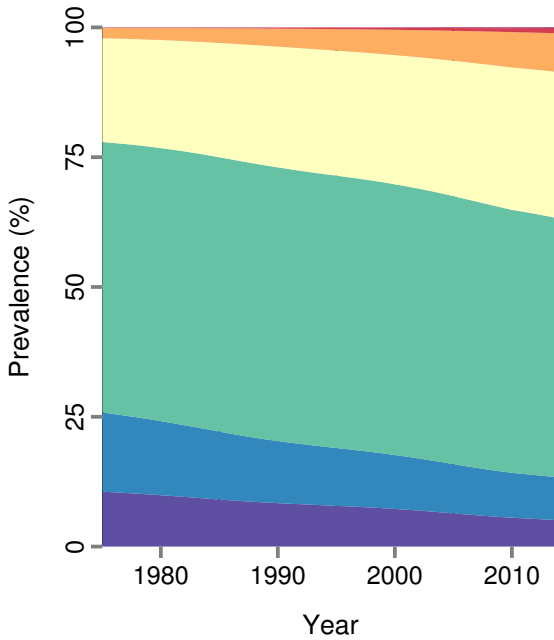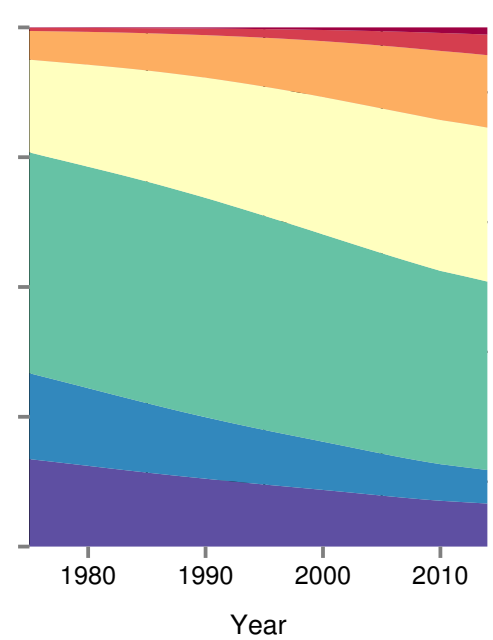

■ BMI <18.5 ■ BMI 18.5-20 ■ BMI 20-25 ■ BMI 25-30 ■ BMI 30-35 ■ BMI 35-40 ■ BMI ≥ 40

Zambia  
East Africa

Men

Women

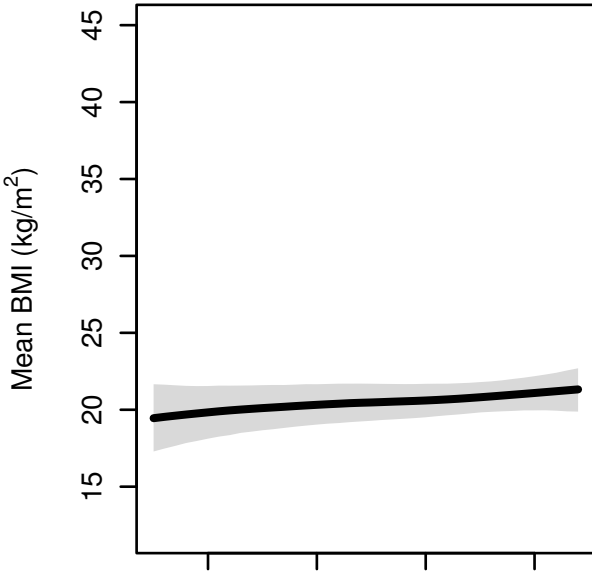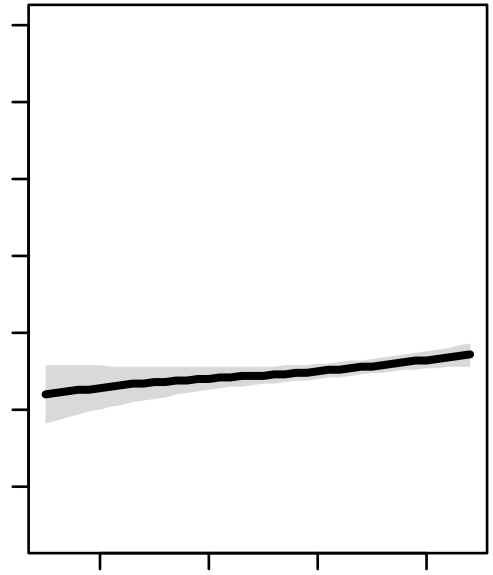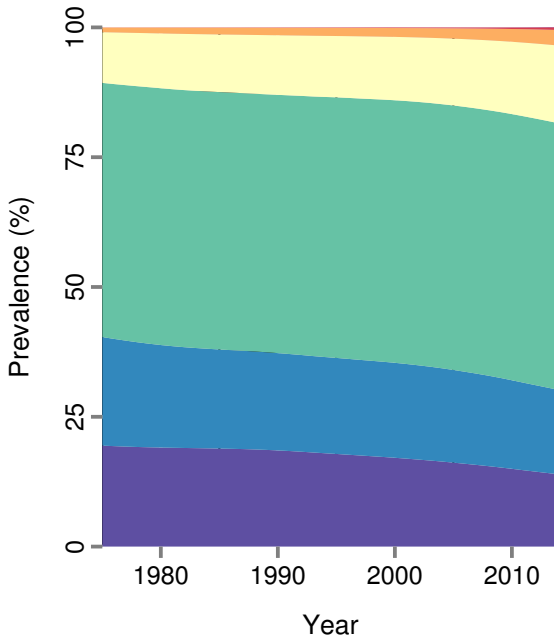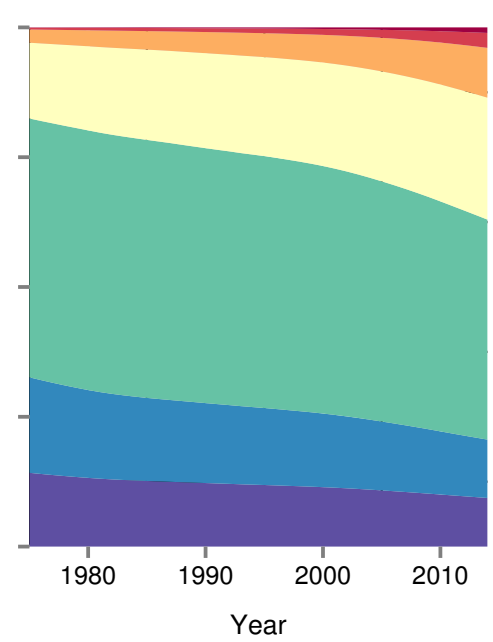

■ BMI <18.5 ■ BMI 18.5-20 ■ BMI 20-25 ■ BMI 25-30 ■ BMI 30-35 ■ BMI 35-40 ■ BMI ≥ 40

Zimbabwe  
Southern Africa

Men

Women

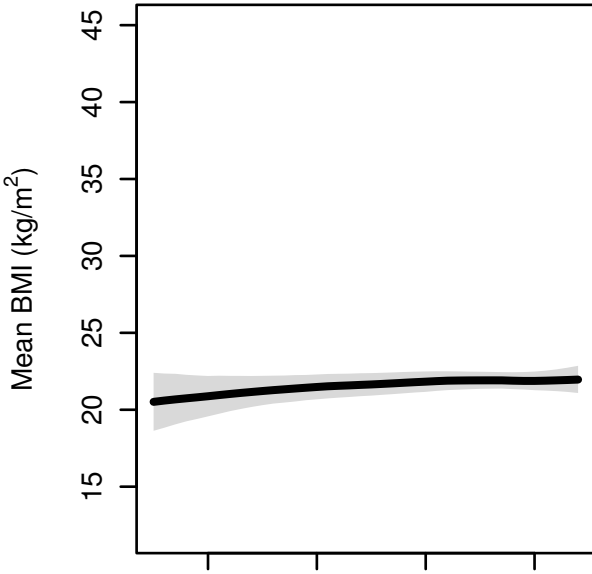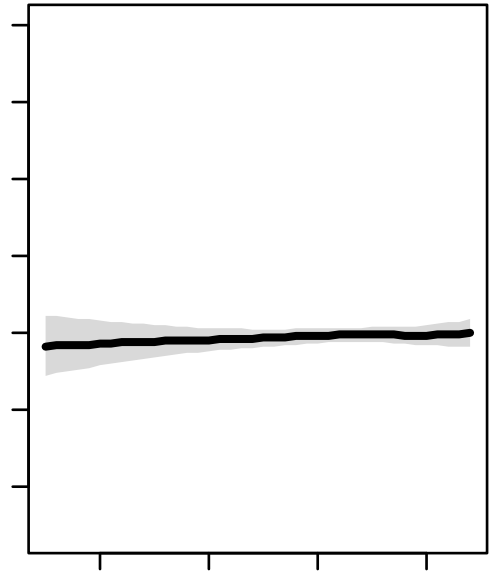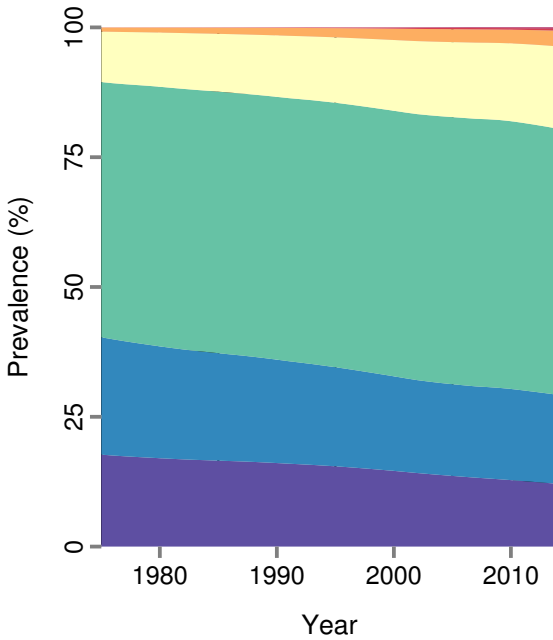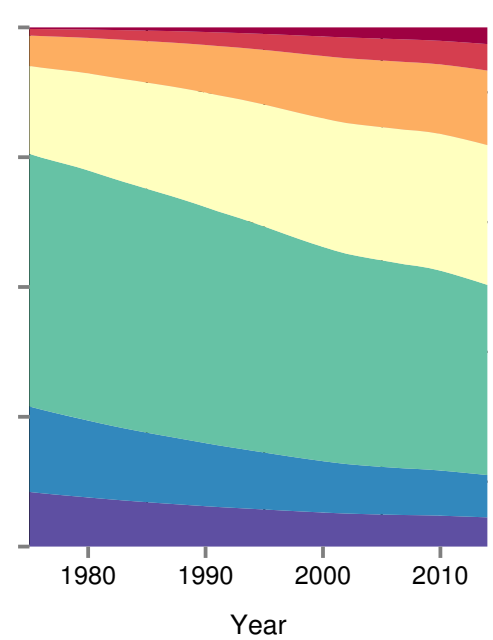

■ BMI <18.5 ■ BMI 18.5-20 ■ BMI 20-25 ■ BMI 25-30 ■ BMI 30-35 ■ BMI 35-40 ■ BMI ≥ 40
